# Supplementary material
Source: MDPI journal article supplement (https://www.mdpi.com/2304-6740/7/4/44)

# checkCIF/PLATON report

Structure factors have been supplied for datablock(s) MAB1

THIS REPORT IS FOR GUIDANCE ONLY. IF USED AS PART OF A REVIEW PROCEDURE FOR PUBLICATION, IT SHOULD NOT REPLACE THE EXPERTISE OF AN EXPERIENCED CRYSTALLOGRAPHIC REFEREE.

No syntax errors found.      CIF dictionary      Interpreting this report

## Datablock: MAB1

---

|                 |                              |                                |
|-----------------|------------------------------|--------------------------------|
| Bond precision: | C-C = 0.0030 A               | Wavelength=0.71075             |
| Cell:           | a=26.0212(3)                 | b=9.1562(1)      c=13.6318(2)  |
|                 | alpha=90                     | beta=99.580(1)      gamma=90   |
| Temperature:    | 100 K                        |                                |
|                 | Calculated                   | Reported                       |
| Volume          | 3202.56(7)                   | 3202.55(7)                     |
| Space group     | C 2/c                        | C 1 2/c 1                      |
| Hall group      | -C 2yc                       | -C 2yc                         |
| Moiety formula  | 2(C4 H19 B6 N3 O13 Zn), H2 O | C4 H19 B6 N3 O13 Zn, 0.5(H2 O) |
| Sum formula     | C8 H40 B12 N6 O27 Zn2        | C4 H20 B6 N3 O13.50 Zn         |
| Mr              | 912.96                       | 456.46                         |
| Dx,g cm-3       | 1.893                        | 1.893                          |
| Z               | 4                            | 8                              |
| Mu (mm-1)       | 1.613                        | 1.613                          |
| F000            | 1864.0                       | 1864.0                         |
| F000'           | 1867.36                      |                                |
| h,k,lmax        | 33,11,17                     | 33,11,17                       |
| Nref            | 3674                         | 3651                           |
| Tmin,Tmax       | 0.660,0.879                  | 0.752,1.000                    |
| Tmin'           | 0.503                        |                                |

Correction method= # Reported T Limits: Tmin=0.752 Tmax=1.000  
AbsCorr = MULTI-SCAN

Data completeness= 0.994      Theta(max)= 27.483

R(reflections)= 0.0240( 3541)      wR2(reflections)= 0.0666( 3651)

S = 1.095      Npar= 287

---

The following ALERTS were generated. Each ALERT has the format

**test-name\_ALERT\_alert-type\_alert-level.**

Click on the hyperlinks for more details of the test.

### ● Alert level C

|                   |                                               |                         |       |              |
|-------------------|-----------------------------------------------|-------------------------|-------|--------------|
| PLAT220_ALERT_2_C | Non-Solvent Resd 1 O                          | Ueq(max)/Ueq(min) Range | 3.7   | Ratio        |
| PLAT313_ALERT_2_C | Oxygen with Three Covalent Bonds (rare) ..... |                         | 01    | Check        |
| PLAT417_ALERT_2_C | Short Inter D-H..H-D                          | H9 ..H12                | 2.10  | Ang.         |
|                   |                                               | 1-x,1-y,1-z =           | 5_666 | Check        |
| PLAT420_ALERT_2_C | D-H Without Acceptor                          | N3 --H3AB               | .     | Please Check |
| PLAT420_ALERT_2_C | D-H Without Acceptor                          | N3 --H3BC               | .     | Please Check |

### ● Alert level G

|                   |                                                  |                |              |
|-------------------|--------------------------------------------------|----------------|--------------|
| PLAT002_ALERT_2_G | Number of Distance or Angle Restraints on AtSite | 17             | Note         |
| PLAT007_ALERT_5_G | Number of Unrefined Donor-H Atoms .....          | 13             | Report       |
| PLAT042_ALERT_1_G | Calc. and Reported MoietyFormula Strings Differ  |                | Please Check |
| PLAT045_ALERT_1_G | Calculated and Reported Z Differ by a Factor ... | 0.50           | Check        |
| PLAT083_ALERT_2_G | SHELXL Second Parameter in WGHT Unusually Large  | 5.54           | Why ?        |
| PLAT172_ALERT_4_G | The CIF-Embedded .res File Contains DFIX Records | 3              | Report       |
| PLAT173_ALERT_4_G | The CIF-Embedded .res File Contains DANG Records | 6              | Report       |
| PLAT176_ALERT_4_G | The CIF-Embedded .res File Contains SADI Records | 3              | Report       |
| PLAT230_ALERT_2_G | Hirshfeld Test Diff for                          | N3 --C4        | 8.0 s.u.     |
| PLAT230_ALERT_2_G | Hirshfeld Test Diff for                          | C3 --C4B       | 6.0 s.u.     |
| PLAT232_ALERT_2_G | Hirshfeld Test Diff (M-X)                        | Zn1 --N3       | 6.1 s.u.     |
| PLAT300_ALERT_4_G | Atom Site Occupancy of O10                       | Constrained at | 0.5 Check    |
| PLAT300_ALERT_4_G | Atom Site Occupancy of O10B                      | Constrained at | 0.5 Check    |
| PLAT300_ALERT_4_G | Atom Site Occupancy of C4                        | Constrained at | 0.5 Check    |
| PLAT300_ALERT_4_G | Atom Site Occupancy of C4B                       | Constrained at | 0.5 Check    |
| PLAT300_ALERT_4_G | Atom Site Occupancy of H3AA                      | Constrained at | 0.5 Check    |
| PLAT300_ALERT_4_G | Atom Site Occupancy of H3AB                      | Constrained at | 0.5 Check    |
| PLAT300_ALERT_4_G | Atom Site Occupancy of H3BC                      | Constrained at | 0.5 Check    |
| PLAT300_ALERT_4_G | Atom Site Occupancy of H3BD                      | Constrained at | 0.5 Check    |
| PLAT300_ALERT_4_G | Atom Site Occupancy of H4A                       | Constrained at | 0.5 Check    |
| PLAT300_ALERT_4_G | Atom Site Occupancy of H4B                       | Constrained at | 0.5 Check    |
| PLAT300_ALERT_4_G | Atom Site Occupancy of H3BE                      | Constrained at | 0.5 Check    |
| PLAT300_ALERT_4_G | Atom Site Occupancy of H3BF                      | Constrained at | 0.5 Check    |
| PLAT300_ALERT_4_G | Atom Site Occupancy of H3AC                      | Constrained at | 0.5 Check    |
| PLAT300_ALERT_4_G | Atom Site Occupancy of H3AD                      | Constrained at | 0.5 Check    |
| PLAT300_ALERT_4_G | Atom Site Occupancy of H4BA                      | Constrained at | 0.5 Check    |
| PLAT300_ALERT_4_G | Atom Site Occupancy of H10                       | Constrained at | 0.5 Check    |
| PLAT300_ALERT_4_G | Atom Site Occupancy of H4BB                      | Constrained at | 0.5 Check    |
| PLAT300_ALERT_4_G | Atom Site Occupancy of H10B                      | Constrained at | 0.5 Check    |
| PLAT300_ALERT_4_G | Atom Site Occupancy of O21                       | Constrained at | 0.5 Check    |
| PLAT300_ALERT_4_G | Atom Site Occupancy of H21A                      | Constrained at | 0.5 Check    |
| PLAT300_ALERT_4_G | Atom Site Occupancy of H21B                      | Constrained at | 0.5 Check    |
| PLAT301_ALERT_3_G | Main Residue Disorder .....                      | (Resd 1 )      | 7% Note      |
| PLAT302_ALERT_4_G | Anion/Solvent/Minor-Residue Disorder (Resd 2 )   |                | 100% Note    |
| PLAT304_ALERT_4_G | Non-Integer Number of Atoms in .....             | Resd 2         | 1.50 Check   |
| PLAT432_ALERT_2_G | Short Inter X...Y Contact                        | O21 ..B6       | 2.90 Ang.    |
|                   |                                                  | x,y,z =        | 1_555 Check  |
| PLAT720_ALERT_4_G | Number of Unusual/Non-Standard Labels .....      |                | 10 Note      |
| PLAT860_ALERT_3_G | Number of Least-Squares Restraints .....         |                | 12 Note      |
| PLAT883_ALERT_1_G | No Info for _atom_sites_solution_primary .....   |                | Please Do !  |

0 **ALERT level A** = Most likely a serious problem - resolve or explain

0 **ALERT level B** = A potentially serious problem, consider carefully

5 **ALERT level C** = Check. Ensure it is not caused by an omission or oversight

39 **ALERT level G** = General information/check it is not something unexpected

3 ALERT type 1 CIF construction/syntax error, inconsistent or missing data  
11 ALERT type 2 Indicator that the structure model may be wrong or deficient  
2 ALERT type 3 Indicator that the structure quality may be low  
27 ALERT type 4 Improvement, methodology, query or suggestion  
1 ALERT type 5 Informative message, check

---

It is advisable to attempt to resolve as many as possible of the alerts in all categories. Often the minor alerts point to easily fixed oversights, errors and omissions in your CIF or refinement strategy, so attention to these fine details can be worthwhile. In order to resolve some of the more serious problems it may be necessary to carry out additional measurements or structure refinements. However, the purpose of your study may justify the reported deviations and the more serious of these should normally be commented upon in the discussion or experimental section of a paper or in the "special\_details" fields of the CIF. checkCIF was carefully designed to identify outliers and unusual parameters, but every test has its limitations and alerts that are not important in a particular case may appear. Conversely, the absence of alerts does not guarantee there are no aspects of the results needing attention. It is up to the individual to critically assess their own results and, if necessary, seek expert advice.

### **Publication of your CIF in IUCr journals**

A basic structural check has been run on your CIF. These basic checks will be run on all CIFs submitted for publication in IUCr journals (*Acta Crystallographica*, *Journal of Applied Crystallography*, *Journal of Synchrotron Radiation*); however, if you intend to submit to *Acta Crystallographica Section C* or *E* or *IUCrData*, you should make sure that full publication checks are run on the final version of your CIF prior to submission.

### **Publication of your CIF in other journals**

Please refer to the *Notes for Authors* of the relevant journal for any special instructions relating to CIF submission.

---

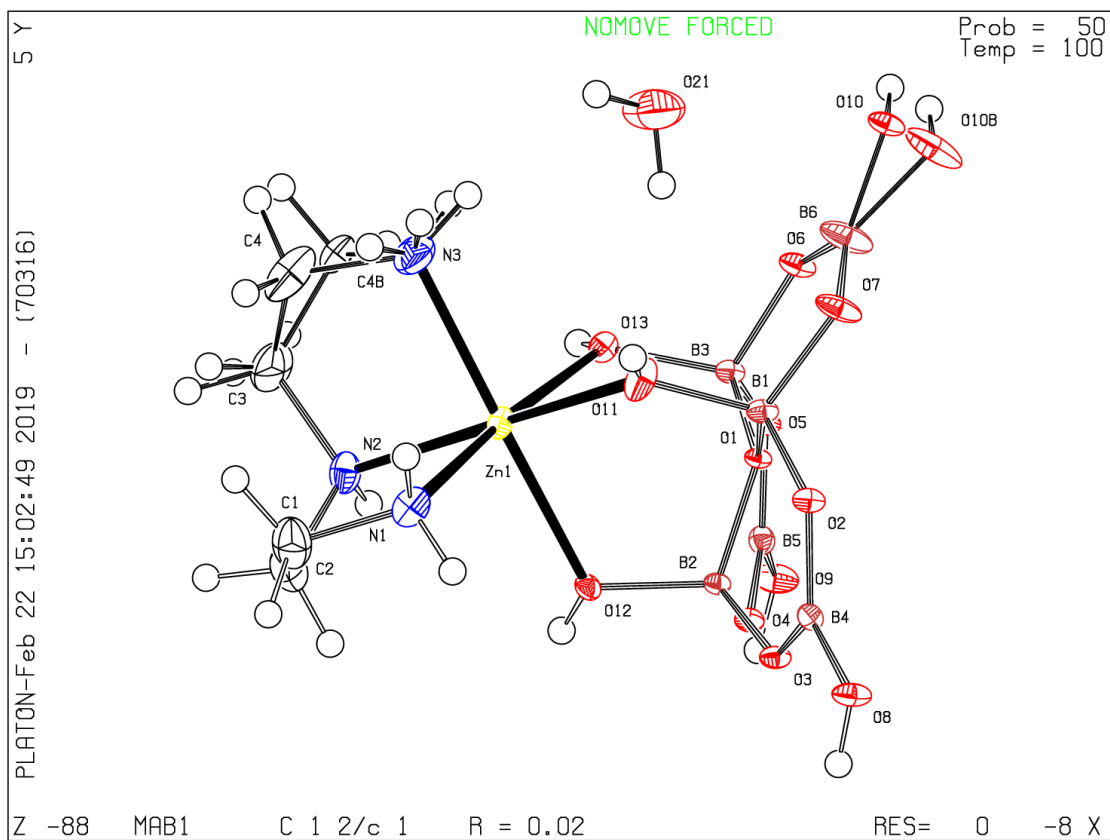

Supplement: s1 [file s1 › MAB1_checkcif.pdf]
