# Supplementary material
Source: MDPI journal article supplement (https://www.mdpi.com/2304-6740/7/4/44)

# checkCIF/PLATON report

Structure factors have been supplied for datablock(s) MAB3

THIS REPORT IS FOR GUIDANCE ONLY. IF USED AS PART OF A REVIEW PROCEDURE FOR PUBLICATION, IT SHOULD NOT REPLACE THE EXPERTISE OF AN EXPERIENCED CRYSTALLOGRAPHIC REFEREE.

No syntax errors found.      CIF dictionary      Interpreting this report

## Datablock: MAB3

---

Bond precision:    C-C = 0.0043 A

Wavelength=0.71075

Cell:                a=9.3681(2)                b=10.6910(2)                c=19.2746(4)  
                      alpha=82.954(2)        beta=76.156(2)        gamma=68.655(2)  
Temperature:        100 K

|                | Calculated                                         | Reported                                         |
|----------------|----------------------------------------------------|--------------------------------------------------|
| Volume         | 1744.44(7)                                         | 1744.44(7)                                       |
| Space group    | P -1                                               | P -1                                             |
| Hall group     | -P 1                                               | -P 1                                             |
| Moiety formula | 2(C3 H17 B12 N2 O24 Zn),<br>3(C3 H12 N2), 14(H2 O) | C3 H17 B12 N2 O24 Zn, 7(H2<br>O), 1.5(C3 H12 N2) |
| Sum formula    | C15 H98 B24 N10 O62 Zn2                            | C7.50 H49 B12 N5 O31 Zn                          |
| Mr             | 1801.25                                            | 900.60                                           |
| Dx,g cm-3      | 1.715                                              | 1.715                                            |
| Z              | 1                                                  | 2                                                |
| Mu (mm-1)      | 0.821                                              | 0.821                                            |
| F000           | 934.0                                              | 934.0                                            |
| F000'          | 935.20                                             |                                                  |
| h,k,lmax       | 12,13,25                                           | 12,13,25                                         |
| Nref           | 7973                                               | 7958                                             |
| Tmin,Tmax      | 0.871,0.936                                        | 0.910,1.000                                      |
| Tmin'          | 0.870                                              |                                                  |

Correction method= # Reported T Limits: Tmin=0.910 Tmax=1.000

AbsCorr = MULTI-SCAN

Data completeness= 0.998

Theta(max)= 27.484

R(reflections)= 0.0425( 7654)

wR2(reflections)= 0.1053( 7958)

S = 1.191

Npar= 590

---

The following ALERTS were generated. Each ALERT has the format

**test-name\_ALERT\_alert-type\_alert-level.**

Click on the hyperlinks for more details of the test.

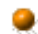

#### Alert level B

PLAT420\_ALERT\_2\_B D-H Without Acceptor O34 --H34B . Please Check

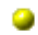

#### Alert level C

PLAT417\_ALERT\_2\_C Short Inter D-H..H-D H32A ..H34B . 2.12 Ang.  
x,y,z = 1\_555 Check

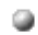

#### Alert level G

PLAT007\_ALERT\_5\_G Number of Unrefined Donor-H Atoms ..... 41 Report  
 PLAT042\_ALERT\_1\_G Calc. and Reported MoietyFormula Strings Differ Please Check  
 PLAT045\_ALERT\_1\_G Calculated and Reported Z Differ by a Factor ... 0.50 Check  
 PLAT083\_ALERT\_2\_G SHELXL Second Parameter in WGHT Unusually Large 5.38 Why ?  
 PLAT154\_ALERT\_1\_G The s.u.'s on the Cell Angles are Equal ..(Note) 0.002 Degree  
 PLAT300\_ALERT\_4\_G Atom Site Occupancy of N21 Constrained at 0.5 Check  
 PLAT300\_ALERT\_4\_G Atom Site Occupancy of N22 Constrained at 0.5 Check  
 PLAT300\_ALERT\_4\_G Atom Site Occupancy of C21 Constrained at 0.5 Check  
 PLAT300\_ALERT\_4\_G Atom Site Occupancy of C22 Constrained at 0.5 Check  
 PLAT300\_ALERT\_4\_G Atom Site Occupancy of C23 Constrained at 0.5 Check  
 PLAT300\_ALERT\_4\_G Atom Site Occupancy of H21A Constrained at 0.5 Check  
 PLAT300\_ALERT\_4\_G Atom Site Occupancy of H21B Constrained at 0.5 Check  
 PLAT300\_ALERT\_4\_G Atom Site Occupancy of H21C Constrained at 0.5 Check  
 PLAT300\_ALERT\_4\_G Atom Site Occupancy of H21D Constrained at 0.5 Check  
 PLAT300\_ALERT\_4\_G Atom Site Occupancy of H21E Constrained at 0.5 Check  
 PLAT300\_ALERT\_4\_G Atom Site Occupancy of H22A Constrained at 0.5 Check  
 PLAT300\_ALERT\_4\_G Atom Site Occupancy of H22B Constrained at 0.5 Check  
 PLAT300\_ALERT\_4\_G Atom Site Occupancy of H22C Constrained at 0.5 Check  
 PLAT300\_ALERT\_4\_G Atom Site Occupancy of H22D Constrained at 0.5 Check  
 PLAT300\_ALERT\_4\_G Atom Site Occupancy of H22E Constrained at 0.5 Check  
 PLAT300\_ALERT\_4\_G Atom Site Occupancy of H23A Constrained at 0.5 Check  
 PLAT300\_ALERT\_4\_G Atom Site Occupancy of H23B Constrained at 0.5 Check  
 PLAT302\_ALERT\_4\_G Anion/Solvent/Minor-Residue Disorder (Resd 3 ) 100% Note  
 PLAT302\_ALERT\_4\_G Anion/Solvent/Minor-Residue Disorder (Resd 9 ) 100% Note  
 PLAT302\_ALERT\_4\_G Anion/Solvent/Minor-Residue Disorder (Resd 10 ) 100% Note  
 PLAT302\_ALERT\_4\_G Anion/Solvent/Minor-Residue Disorder (Resd 11 ) 100% Note  
 PLAT302\_ALERT\_4\_G Anion/Solvent/Minor-Residue Disorder (Resd 12 ) 100% Note  
 PLAT304\_ALERT\_4\_G Non-Integer Number of Atoms in ..... Resd 3 8.50 Check  
 PLAT304\_ALERT\_4\_G Non-Integer Number of Atoms in ..... Resd 9 1.57 Check  
 PLAT304\_ALERT\_4\_G Non-Integer Number of Atoms in ..... Resd 10 1.64 Check  
 PLAT304\_ALERT\_4\_G Non-Integer Number of Atoms in ..... Resd 11 1.42 Check  
 PLAT304\_ALERT\_4\_G Non-Integer Number of Atoms in ..... Resd 12 1.36 Check  
 PLAT789\_ALERT\_4\_G Atoms with Negative \_atom\_site\_disorder\_group # 17 Check  
 PLAT790\_ALERT\_4\_G Centre of Gravity not Within Unit Cell: Resd. # 10 Note  
           H2 O  
 PLAT790\_ALERT\_4\_G Centre of Gravity not Within Unit Cell: Resd. # 12 Note  
           H2 O  
 PLAT794\_ALERT\_5\_G Tentative Bond Valency for Zn1 (II) . 1.93 Info  
 PLAT933\_ALERT\_2\_G Number of OMIT Records in Embedded .res File ... 3 Note

0 **ALERT level A** = Most likely a serious problem - resolve or explain

1 **ALERT level B** = A potentially serious problem, consider carefully

1 **ALERT level C** = Check. Ensure it is not caused by an omission or oversight

37 **ALERT level G** = General information/check it is not something unexpected

3 ALERT type 1 CIF construction/syntax error, inconsistent or missing data  
4 ALERT type 2 Indicator that the structure model may be wrong or deficient  
0 ALERT type 3 Indicator that the structure quality may be low  
30 ALERT type 4 Improvement, methodology, query or suggestion  
2 ALERT type 5 Informative message, check

---

---

It is advisable to attempt to resolve as many as possible of the alerts in all categories. Often the minor alerts point to easily fixed oversights, errors and omissions in your CIF or refinement strategy, so attention to these fine details can be worthwhile. In order to resolve some of the more serious problems it may be necessary to carry out additional measurements or structure refinements. However, the purpose of your study may justify the reported deviations and the more serious of these should normally be commented upon in the discussion or experimental section of a paper or in the "special\_details" fields of the CIF. checkCIF was carefully designed to identify outliers and unusual parameters, but every test has its limitations and alerts that are not important in a particular case may appear. Conversely, the absence of alerts does not guarantee there are no aspects of the results needing attention. It is up to the individual to critically assess their own results and, if necessary, seek expert advice.

### **Publication of your CIF in IUCr journals**

A basic structural check has been run on your CIF. These basic checks will be run on all CIFs submitted for publication in IUCr journals (*Acta Crystallographica*, *Journal of Applied Crystallography*, *Journal of Synchrotron Radiation*); however, if you intend to submit to *Acta Crystallographica Section C* or *E* or *IUCrData*, you should make sure that full publication checks are run on the final version of your CIF prior to submission.

### **Publication of your CIF in other journals**

Please refer to the *Notes for Authors* of the relevant journal for any special instructions relating to CIF submission.

---

**PLATON version of 18/02/2019; check.def file version of 18/02/2019**

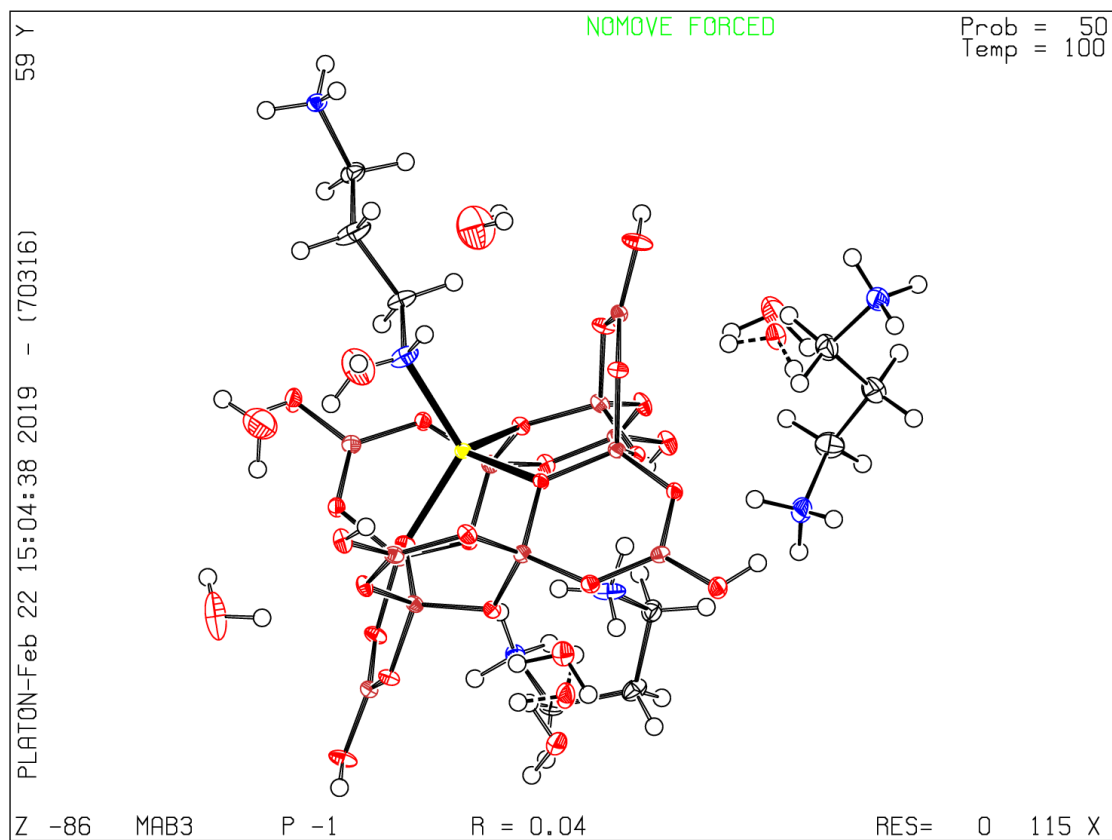

Supplement: s1 [file s1 › MAB3_checkcif.pdf]
