# Supplementary material
Source: MDPI journal article supplement (https://www.mdpi.com/2304-6740/7/4/44)
Supplement: s1 [file s1]

Archive with 7 entries (7 files):
- MAB1.cif
- MAB1_checkcif.pdf
- MAB2.cif
- MAB2_checkcif.pdf
- MAB3.cif
- MAB3_checkcif.pdf
- Thermal (TGA)and Spectroscopic (NMR, IR) ESI.pdf
