# Supplementary material
Source: MDPI journal article supplement (https://www.mdpi.com/2304-6740/7/4/44)
Supplement: s1 [file s1 › MAB1.cif]

data_MAB1

#2016ncs0789n

_audit_creation_date               2019-02-22
_audit_creation_method
;
Olex2 1.2
(compiled 2018.05.29 svn.r3508 for OlexSys, GUI svn.r5506)
;
_shelx_SHELXL_version_number       '2018/3'
_audit_contact_author_address      ?
_audit_contact_author_email        ?
_audit_contact_author_name         ''
_audit_contact_author_phone        ?
_publ_contact_author_id_orcid      ?
_publ_section_references
;
Dolomanov, O.V., Bourhis, L.J., Gildea, R.J, Howard, J.A.K. & Puschmann, H.
 (2009), J. Appl. Cryst. 42, 339-341.

Sheldrick, G.M. (2015). Acta Cryst. C71, 3-8.
;
_chemical_name_common              ?
_chemical_name_systematic          ?
_chemical_formula_moiety           'C4 H19 B6 N3 O13 Zn, 0.5(H2 O)'
_chemical_formula_sum              'C4 H20 B6 N3 O13.50 Zn'
_chemical_formula_weight           456.46
_chemical_melting_point            ?
_chemical_oxdiff_formula           'C4 N3 B6 O11 Zn H26'
_chemical_oxdiff_usercomment       MAB/M1/ZnDienB
loop_
  _atom_type_symbol
  _atom_type_description
  _atom_type_scat_dispersion_real
  _atom_type_scat_dispersion_imag
  _atom_type_scat_source
 'C' 'C' 0.0033 0.0016 'International Tables Vol C Tables 4.2.6.8 and 6.1.1.4'
 'H' 'H' 0.0000 0.0000 'International Tables Vol C Tables 4.2.6.8 and 6.1.1.4'
 'B' 'B' 0.0013 0.0007 'International Tables Vol C Tables 4.2.6.8 and 6.1.1.4'
 'N' 'N' 0.0061 0.0033 'International Tables Vol C Tables 4.2.6.8 and 6.1.1.4'
 'O' 'O' 0.0106 0.0060 'International Tables Vol C Tables 4.2.6.8 and 6.1.1.4'
 'Zn' 'Zn' 0.2839 1.4301 'International Tables Vol C Tables 4.2.6.8 and 6.1.1.4'

_shelx_space_group_comment
;
The symmetry employed for this shelxl refinement is uniquely defined
by the following loop, which should always be used as a source of
symmetry information in preference to the above space-group names.
They are only intended as comments.
;
_space_group_crystal_system        'monoclinic'
_space_group_IT_number             15
_space_group_name_H-M_alt          'C 1 2/c 1'
_space_group_name_Hall             '-C 2yc'
loop_
  _space_group_symop_operation_xyz
 'x, y, z'
 '-x, y, -z+1/2'
 'x+1/2, y+1/2, z'
 '-x+1/2, y+1/2, -z+1/2'
 '-x, -y, -z'
 'x, -y, z-1/2'
 '-x+1/2, -y+1/2, -z'
 'x+1/2, -y+1/2, z-1/2'

_cell_length_a                     26.0212(3)
_cell_length_b                     9.15620(10)
_cell_length_c                     13.6318(2)
_cell_angle_alpha                  90
_cell_angle_beta                   99.5800(10)
_cell_angle_gamma                  90
_cell_volume                       3202.55(7)
_cell_formula_units_Z              8
_cell_measurement_reflns_used      15078
_cell_measurement_temperature      100(2)
_cell_measurement_theta_max        30.2600
_cell_measurement_theta_min        2.7260
_shelx_estimated_absorpt_T_max     0.882
_shelx_estimated_absorpt_T_min     0.551
_exptl_absorpt_coefficient_mu      1.613
_exptl_absorpt_correction_T_max    1.00000
_exptl_absorpt_correction_T_min    0.75242
_exptl_absorpt_correction_type     multi-scan
_exptl_absorpt_process_details
;
CrysAlisPro 1.171.40.18b (Rigaku Oxford Diffraction, 2018)
Empirical absorption correction using spherical harmonics,
 implemented in SCALE3 ABSPACK scaling algorithm.
;
_exptl_absorpt_special_details     ?
_exptl_crystal_colour              colourless
_exptl_crystal_colour_primary      colourless
_exptl_crystal_density_diffrn      1.893
_exptl_crystal_density_meas        ?
_exptl_crystal_density_method      ?
_exptl_crystal_description         block
_exptl_crystal_F_000               1864
_exptl_crystal_recrystallization_method 
 'The material was recrystallised from water'
_exptl_crystal_size_max            0.42
_exptl_crystal_size_mid            0.22
_exptl_crystal_size_min            0.08
_exptl_transmission_factor_max     ?
_exptl_transmission_factor_min     ?
_diffrn_reflns_av_R_equivalents    0.0241
_diffrn_reflns_av_unetI/netI       0.0156
_diffrn_reflns_Laue_measured_fraction_full  0.994
_diffrn_reflns_Laue_measured_fraction_max  0.994
_diffrn_reflns_limit_h_max         33
_diffrn_reflns_limit_h_min         -32
_diffrn_reflns_limit_k_max         11
_diffrn_reflns_limit_k_min         -11
_diffrn_reflns_limit_l_max         17
_diffrn_reflns_limit_l_min         -17
_diffrn_reflns_number              18390
_diffrn_reflns_point_group_measured_fraction_full  0.994
_diffrn_reflns_point_group_measured_fraction_max  0.994
_diffrn_reflns_theta_full          25.242
_diffrn_reflns_theta_max           27.483
_diffrn_reflns_theta_min           2.734
_diffrn_ambient_environment        N~2~
_diffrn_ambient_temperature        100(2)
_diffrn_detector                   'CCD area detector'
_diffrn_detector_area_resol_mean   28.5714
_diffrn_detector_dtime             0.000
_diffrn_detector_type              'Rigaku HG Saturn724+ (2x2 bin mode)'
_diffrn_measured_fraction_theta_full  0.994
_diffrn_measured_fraction_theta_max  0.994
_diffrn_measurement_details
;
List of Runs (angles in degrees, time in seconds):

  # Type    Start    End  Width  t~exp~   \w     \q     \k     \f   Frames
--------------------------------------------------------------------------
  1  \w    -98.00  19.00   1.00    2.00    --   -9.50 -57.00 -60.00  117
  2  \w    -98.00  19.00   1.00    2.00    --   -9.50 -57.00 -90.00  117
  3  \w    -33.00  79.00   1.00    2.00    --   -9.50  38.00 -90.00  112
  4  \w    -33.00  -3.00   1.00    2.00    --   -9.50  38.00  30.00   30
;
_diffrn_measurement_device         'four-circle diffractometer'
_diffrn_measurement_device_details  'Rigaku, AFC12 \k goniometer'
_diffrn_measurement_device_type   
 'Rigaku FRE+ equipped with HF Varimax confocal mirrors and an AFC12 goniometer and HG Saturn 724+ detector'
_diffrn_measurement_method         'profile data from \w-scans'
_diffrn_measurement_specimen_support  'MiTeGen MicroLoop'
_diffrn_orient_matrix_type        
 'CrysAlisPro convention (1999,Acta A55,543-557)'
_diffrn_orient_matrix_UB_11        -0.0163980000
_diffrn_orient_matrix_UB_12        -0.0306357000
_diffrn_orient_matrix_UB_13        -0.0416834000
_diffrn_orient_matrix_UB_21        -0.0113781000
_diffrn_orient_matrix_UB_22        0.0695346000
_diffrn_orient_matrix_UB_23        -0.0118337000
_diffrn_orient_matrix_UB_31        0.0191250000
_diffrn_orient_matrix_UB_32        0.0150886000
_diffrn_orient_matrix_UB_33        -0.0301134000
_diffrn_radiation_collimation      0.2
_diffrn_radiation_monochromator    'Confocal mirrors, HF Varimax'
_diffrn_radiation_probe            x-ray
_diffrn_radiation_type             MoK\a
_diffrn_radiation_wavelength       0.71075
_diffrn_source                     'Rotating Anode'
_diffrn_source_current             55.0
_diffrn_source_power               2.475
_diffrn_source_target              Mo
_diffrn_source_type                'Rigaku FRE+'
_diffrn_source_voltage             45.0
_reflns_Friedel_coverage           0.000
_reflns_Friedel_fraction_full      .
_reflns_Friedel_fraction_max       .
_reflns_number_gt                  3541
_reflns_number_total               3651
_reflns_odcompleteness_completeness  99.33
_reflns_odcompleteness_iscentric   1
_reflns_odcompleteness_theta       27.42
_reflns_special_details
;
 Reflections were merged by SHELXL according to the crystal
 class for the calculation of statistics and refinement.
 
 _reflns_Friedel_fraction is defined as the number of unique
 Friedel pairs measured divided by the number that would be
 possible theoretically, ignoring centric projections and
 systematic absences.
;
_reflns_threshold_expression       'I > 2\s(I)'
_computing_cell_refinement         'CrysAlisPro 1.171.40.18b (Rigaku OD, 2018)'
_computing_data_collection         'CrysAlisPro 1.171.40.18b (Rigaku OD, 2018)'
_computing_data_reduction          'CrysAlisPro 1.171.40.18b (Rigaku OD, 2018)'
_computing_molecular_graphics      'Olex2 (Dolomanov et al., 2009)'
_computing_publication_material    'Olex2 (Dolomanov et al., 2009)'
_computing_structure_refinement    'ShelXL (Sheldrick, 2015)'
_computing_structure_solution      'SHELXT 2018/2 (Sheldrick, 2018)'
_refine_diff_density_max           0.349
_refine_diff_density_min           -0.303
_refine_diff_density_rms           0.065
_refine_ls_extinction_coef         .
_refine_ls_extinction_method       none
_refine_ls_goodness_of_fit_ref     1.095
_refine_ls_hydrogen_treatment      mixed
_refine_ls_matrix_type             full
_refine_ls_number_parameters       287
_refine_ls_number_reflns           3651
_refine_ls_number_restraints       12
_refine_ls_R_factor_all            0.0249
_refine_ls_R_factor_gt             0.0240
_refine_ls_restrained_S_all        1.105
_refine_ls_shift/su_max            0.004
_refine_ls_shift/su_mean           0.000
_refine_ls_structure_factor_coef   Fsqd
_refine_ls_weighting_details      
 'w=1/[\s^2^(Fo^2^)+(0.0329P)^2^+5.5365P] where P=(Fo^2^+2Fc^2^)/3'
_refine_ls_weighting_scheme        calc
_refine_ls_wR_factor_gt            0.0660
_refine_ls_wR_factor_ref           0.0666
_refine_special_details           
 'There is disorder over 2 positions of both a methylene and hydroxyl group. Witith only one of the 2 components there exists a solvent water molecule. Their occupancies were allowed to freely refine but resulted in close to 50:50 occupancies so they were then fixed as half occupied.'
_olex2_refinement_description
;
1. Fixed Uiso
 At 1.2 times of:
  All C(H,H) groups, All C(H,H,H,H) groups, All N(H) groups, All N(H,H)
  groups, All N(H,H,H,H) groups
 At 1.5 times of:
  All O(H) groups, All O(H,H) groups
2. Restrained distances
 O12-H12
 0.87 with sigma of 0.01
 O13-H13
 0.87 with sigma of 0.01
 O11-H11
 0.87 with sigma of 0.01
 B2-H12
 1.951291 with sigma of 0.02
 Zn1-H12
 2.854795 with sigma of 0.02
 B3-H13
 1.940273 with sigma of 0.02
 Zn1-H13
 2.828898 with sigma of 0.02
 B1-H11
 1.932104 with sigma of 0.02
 Zn1-H11
 2.678207 with sigma of 0.02
 N3-C4B \\sim N3-C4
 with sigma of 0.02
 C4-C3 \\sim C4B-C3
 with sigma of 0.02
 O10-B6 \\sim O10B-B6
 with sigma of 0.02
3. Others
 Fixed Sof: H3AA(0.5) H3AB(0.5) H3BC(0.5) H3BD(0.5) H3BE(0.5) H3BF(0.5)
 H3AC(0.5) H3AD(0.5) O10(0.5) H10(0.5) C4(0.5) H4A(0.5) H4B(0.5) O10B(0.5)
 H10B(0.5) C4B(0.5) H4BA(0.5) H4BB(0.5) O21(0.5) H21A(0.5) H21B(0.5)
4.a Free rotating group:
 O21(H21A,H21B)
4.b Ternary CH refined with riding coordinates:
 N2(H2)
4.c Secondary CH2 refined with riding coordinates:
 N1(H1A,H1B), N3(H3AA,H3AB), N3(H3BC,H3BD), C1(H1C,H1D), C2(H2A,H2B), C3(H3BE,
 H3BF), C3(H3AC,H3AD), C4(H4A,H4B), C4B(H4BA,H4BB)
4.d Idealised tetrahedral OH refined as rotating group:
 O8(H8), O9(H9), O10(H10), O10B(H10B)
;
_atom_sites_solution_hydrogens     mixed
_atom_sites_solution_primary       ?
_atom_sites_solution_secondary     ?
loop_
  _atom_site_label
  _atom_site_type_symbol
  _atom_site_fract_x
  _atom_site_fract_y
  _atom_site_fract_z
  _atom_site_U_iso_or_equiv
  _atom_site_adp_type
  _atom_site_occupancy
  _atom_site_site_symmetry_order
  _atom_site_calc_flag
  _atom_site_refinement_flags_posn
  _atom_site_refinement_flags_adp
  _atom_site_refinement_flags_occupancy
  _atom_site_disorder_assembly
  _atom_site_disorder_group
 Zn1 Zn 0.63743(2) 0.71238(2) 0.61489(2) 0.01141(7) Uani 1 1 d D . . . .
 O1 O 0.62453(4) 0.38670(11) 0.61163(7) 0.00706(19) Uani 1 1 d . . . . .
 O2 O 0.63099(4) 0.35970(12) 0.79065(7) 0.0098(2) Uani 1 1 d . . . . .
 O3 O 0.54752(4) 0.37101(12) 0.68541(7) 0.0094(2) Uani 1 1 d . . . . .
 O4 O 0.53959(4) 0.36734(11) 0.50908(7) 0.0088(2) Uani 1 1 d . . . . .
 O5 O 0.61659(4) 0.34148(12) 0.43507(7) 0.0097(2) Uani 1 1 d . . . . .
 O6 O 0.69974(4) 0.33112(12) 0.53786(8) 0.0116(2) Uani 1 1 d . . . . .
 O7 O 0.70520(4) 0.31573(14) 0.71477(8) 0.0163(2) Uani 1 1 d . . . . .
 O8 O 0.55521(4) 0.31031(13) 0.85621(8) 0.0130(2) Uani 1 1 d . . . . .
 H8 H 0.522744 0.320208 0.841554 0.020 Uiso 1 1 calc GR . . . .
 O9 O 0.53517(4) 0.29939(13) 0.33961(8) 0.0159(2) Uani 1 1 d . . . . .
 H9 H 0.503608 0.318579 0.339641 0.024 Uiso 1 1 calc GR . . . .
 O11 O 0.67193(5) 0.56051(12) 0.71662(8) 0.0160(2) Uani 1 1 d D . . . .
 H11 H 0.6890(7) 0.5840(17) 0.7737(9) 0.024 Uiso 1 1 d DR . . . .
 O12 O 0.56422(4) 0.59050(11) 0.59768(8) 0.0097(2) Uani 1 1 d D . . . .
 H12 H 0.5384(5) 0.6110(17) 0.5503(11) 0.015 Uiso 1 1 d DR . . . .
 O13 O 0.65681(4) 0.56297(12) 0.50367(8) 0.0106(2) Uani 1 1 d D . . . .
 H13 H 0.6497(8) 0.5809(16) 0.4403(7) 0.016 Uiso 1 1 d DR . . . .
 N1 N 0.61506(6) 0.84467(16) 0.72906(10) 0.0181(3) Uani 1 1 d . . . . .
 H1A H 0.591360 0.795857 0.758825 0.022 Uiso 1 1 calc R . . . .
 H1B H 0.643436 0.863644 0.776035 0.022 Uiso 1 1 calc R . . . .
 N2 N 0.60114(6) 0.88403(15) 0.52138(10) 0.0171(3) Uani 1 1 d . . . . .
 H2 H 0.579458 0.839874 0.461242 0.020 Uiso 1 1 calc R . . . .
 N3 N 0.70743(6) 0.82421(18) 0.59458(12) 0.0238(3) Uani 1 1 d D . . . .
 H3AA H 0.729490 0.831808 0.653606 0.029 Uiso 0.5 1 calc R . P A 1
 H3AB H 0.723909 0.774300 0.551125 0.029 Uiso 0.5 1 calc R . P A 1
 H3BC H 0.716885 0.891047 0.643668 0.029 Uiso 0.5 1 calc R . P B 2
 H3BD H 0.734110 0.760057 0.594235 0.029 Uiso 0.5 1 calc R . P B 2
 C1 C 0.59224(8) 0.9831(2) 0.68747(14) 0.0275(4) Uani 1 1 d . . . . .
 H1C H 0.619901 1.058068 0.691002 0.033 Uiso 1 1 calc R . . . .
 H1D H 0.566124 1.017791 0.727294 0.033 Uiso 1 1 calc R . . . .
 C2 C 0.56636(8) 0.9624(2) 0.57985(14) 0.0255(4) Uani 1 1 d . . . . .
 H2A H 0.533697 0.906273 0.577882 0.031 Uiso 1 1 calc R . . . .
 H2B H 0.557246 1.059120 0.549318 0.031 Uiso 1 1 calc R . . . .
 C3 C 0.64223(8) 0.9747(2) 0.48953(16) 0.0310(4) Uani 1 1 d D . . . .
 H3BE H 0.647556 1.062524 0.532380 0.037 Uiso 0.5 1 calc R . P C 2
 H3BF H 0.630086 1.007922 0.420456 0.037 Uiso 0.5 1 calc R . P C 2
 H3AC H 0.647294 0.942354 0.422500 0.037 Uiso 0.5 1 calc R . P D 1
 H3AD H 0.630004 1.077208 0.483798 0.037 Uiso 0.5 1 calc R . P D 1
 B1 B 0.65884(6) 0.40546(18) 0.71224(12) 0.0093(3) Uani 1 1 d D . . . .
 B2 B 0.56758(6) 0.42926(18) 0.60050(12) 0.0081(3) Uani 1 1 d D . . . .
 B3 B 0.64959(6) 0.40624(18) 0.51916(12) 0.0087(3) Uani 1 1 d D . . . .
 B4 B 0.57796(6) 0.34887(18) 0.77622(12) 0.0095(3) Uani 1 1 d . . . . .
 B5 B 0.56399(6) 0.33855(18) 0.42956(12) 0.0100(3) Uani 1 1 d . . . . .
 B6 B 0.72492(8) 0.2912(2) 0.62973(14) 0.0216(4) Uani 1 1 d D . . . .
 O10 O 0.77666(12) 0.2491(3) 0.6411(2) 0.0109(6) Uani 0.5 1 d D . P E 1
 H10 H 0.784848 0.234167 0.584869 0.016 Uiso 0.5 1 calc GR . P E 1
 C4 C 0.69213(18) 0.9704(5) 0.5551(3) 0.0353(10) Uani 0.5 1 d D . P F 1
 H4A H 0.690867 1.037433 0.611591 0.042 Uiso 0.5 1 calc R . P F 1
 H4B H 0.719279 1.007025 0.518318 0.042 Uiso 0.5 1 calc R . P F 1
 O10B O 0.76539(15) 0.1867(5) 0.6328(3) 0.0260(8) Uani 0.5 1 d D . P E 2
 H10B H 0.774924 0.182541 0.576947 0.039 Uiso 0.5 1 calc GR . P E 2
 C4B C 0.69307(14) 0.8989(4) 0.4937(3) 0.0211(7) Uani 0.5 1 d D . P F 2
 H4BA H 0.720378 0.970362 0.484220 0.025 Uiso 0.5 1 calc R . P F 2
 H4BB H 0.690521 0.825396 0.439802 0.025 Uiso 0.5 1 calc R . P F 2
 O21 O 0.78638(12) 0.5514(4) 0.6869(3) 0.0477(9) Uani 0.5 1 d . . P G 1
 H21A H 0.753433 0.538047 0.688028 0.072 Uiso 0.5 1 d G . P G 1
 H21B H 0.796822 0.630959 0.719007 0.072 Uiso 0.5 1 d G . P G 1

loop_
  _atom_site_aniso_label
  _atom_site_aniso_U_11
  _atom_site_aniso_U_22
  _atom_site_aniso_U_33
  _atom_site_aniso_U_23
  _atom_site_aniso_U_13
  _atom_site_aniso_U_12
 Zn1 0.01326(11) 0.00926(10) 0.01086(10) 0.00125(6) -0.00044(7) -0.00202(6)
 O1 0.0050(4) 0.0103(5) 0.0058(5) 0.0007(3) 0.0008(3) 0.0010(4)
 O2 0.0077(5) 0.0149(5) 0.0065(5) 0.0006(4) 0.0009(4) 0.0007(4)
 O3 0.0068(5) 0.0142(5) 0.0074(5) 0.0018(4) 0.0015(4) 0.0004(4)
 O4 0.0070(5) 0.0119(5) 0.0072(5) -0.0006(4) 0.0001(4) 0.0002(4)
 O5 0.0089(5) 0.0126(5) 0.0074(5) -0.0011(4) 0.0008(4) 0.0013(4)
 O6 0.0080(5) 0.0193(5) 0.0077(5) 0.0024(4) 0.0018(4) 0.0043(4)
 O7 0.0102(5) 0.0310(6) 0.0079(5) 0.0043(4) 0.0017(4) 0.0098(5)
 O8 0.0071(5) 0.0231(6) 0.0089(5) 0.0043(4) 0.0016(4) 0.0018(4)
 O9 0.0101(5) 0.0266(6) 0.0104(5) -0.0050(4) -0.0004(4) 0.0004(4)
 O11 0.0215(6) 0.0145(5) 0.0089(5) 0.0018(4) -0.0063(4) -0.0073(4)
 O12 0.0078(5) 0.0093(5) 0.0110(5) 0.0002(4) -0.0011(4) 0.0014(4)
 O13 0.0125(5) 0.0120(5) 0.0070(5) 0.0018(4) 0.0009(4) -0.0009(4)
 N1 0.0218(7) 0.0188(7) 0.0137(6) -0.0012(5) 0.0030(5) -0.0044(6)
 N2 0.0222(7) 0.0137(6) 0.0141(6) 0.0024(5) -0.0005(5) -0.0004(5)
 N3 0.0184(7) 0.0228(7) 0.0286(8) 0.0030(6) -0.0012(6) -0.0068(6)
 C1 0.0388(11) 0.0202(9) 0.0249(9) -0.0025(7) 0.0097(8) 0.0029(8)
 C2 0.0284(9) 0.0209(9) 0.0271(9) 0.0036(7) 0.0044(7) 0.0066(7)
 C3 0.0341(11) 0.0279(10) 0.0315(10) 0.0155(8) 0.0070(8) -0.0028(8)
 B1 0.0063(7) 0.0145(8) 0.0066(7) 0.0015(6) -0.0008(5) 0.0001(6)
 B2 0.0059(7) 0.0102(7) 0.0080(7) 0.0004(5) 0.0006(5) 0.0005(6)
 B3 0.0072(7) 0.0123(7) 0.0066(7) 0.0014(5) 0.0010(5) 0.0010(6)
 B4 0.0096(7) 0.0093(7) 0.0097(7) 0.0003(6) 0.0018(6) 0.0016(6)
 B5 0.0105(7) 0.0092(7) 0.0099(7) 0.0005(6) 0.0005(6) 0.0005(6)
 B6 0.0139(9) 0.0407(12) 0.0104(8) 0.0055(7) 0.0028(7) 0.0131(8)
 O10 0.0074(13) 0.0189(15) 0.0063(12) 0.0008(12) 0.0011(9) 0.0045(11)
 C4 0.043(2) 0.034(2) 0.030(2) 0.0045(18) 0.0064(18) -0.0195(19)
 O10B 0.0224(19) 0.047(2) 0.0095(14) 0.0058(17) 0.0051(12) 0.0236(17)
 C4B 0.0218(17) 0.0172(16) 0.0258(18) 0.0053(14) 0.0082(14) -0.0053(13)
 O21 0.0263(16) 0.0427(19) 0.078(3) -0.0312(18) 0.0206(16) -0.0103(14)

_geom_special_details
;
 All esds (except the esd in the dihedral angle between two l.s. planes)
 are estimated using the full covariance matrix.  The cell esds are taken
 into account individually in the estimation of esds in distances, angles
 and torsion angles; correlations between esds in cell parameters are only
 used when they are defined by crystal symmetry.  An approximate (isotropic)
 treatment of cell esds is used for estimating esds involving l.s. planes.
;
loop_
  _geom_bond_atom_site_label_1
  _geom_bond_atom_site_label_2
  _geom_bond_distance
  _geom_bond_site_symmetry_2
  _geom_bond_publ_flag
 Zn1 O11 2.0612(11) . ?
 Zn1 O12 2.1864(10) . ?
 Zn1 O13 2.1630(11) . ?
 Zn1 N1 2.1283(14) . ?
 Zn1 N2 2.1414(14) . ?
 Zn1 N3 2.1473(15) . ?
 O1 B1 1.5166(18) . ?
 O1 B2 1.5154(18) . ?
 O1 B3 1.5231(18) . ?
 O2 B1 1.4494(18) . ?
 O2 B4 1.3648(19) . ?
 O3 B2 1.4483(18) . ?
 O3 B4 1.3691(19) . ?
 O4 B2 1.4501(18) . ?
 O4 B5 1.3700(19) . ?
 O5 B3 1.4407(19) . ?
 O5 B5 1.3585(19) . ?
 O6 B3 1.4594(19) . ?
 O6 B6 1.363(2) . ?
 O7 B1 1.4552(19) . ?
 O7 B6 1.362(2) . ?
 O8 H8 0.8400 . ?
 O8 B4 1.3708(19) . ?
 O9 H9 0.8400 . ?
 O9 B5 1.374(2) . ?
 O11 H11 0.857(9) . ?
 O11 B1 1.459(2) . ?
 O12 H12 0.872(9) . ?
 O12 B2 1.4791(19) . ?
 O13 H13 0.869(9) . ?
 O13 B3 1.4672(19) . ?
 N1 H1A 0.9100 . ?
 N1 H1B 0.9100 . ?
 N1 C1 1.473(2) . ?
 N2 H2 1.0000 . ?
 N2 C2 1.487(2) . ?
 N2 C3 1.475(2) . ?
 N3 H3AA 0.9100 . ?
 N3 H3AB 0.9100 . ?
 N3 H3BC 0.9100 . ?
 N3 H3BD 0.9100 . ?
 N3 C4 1.473(5) . ?
 N3 C4B 1.526(4) . ?
 C1 H1C 0.9900 . ?
 C1 H1D 0.9900 . ?
 C1 C2 1.521(3) . ?
 C2 H2A 0.9900 . ?
 C2 H2B 0.9900 . ?
 C3 H3BE 0.9900 . ?
 C3 H3BF 0.9900 . ?
 C3 H3AC 0.9900 . ?
 C3 H3AD 0.9900 . ?
 C3 C4 1.449(5) . ?
 C3 C4B 1.487(4) . ?
 B6 O10 1.384(4) . ?
 B6 O10B 1.418(4) . ?
 O10 H10 0.8400 . ?
 C4 H4A 0.9900 . ?
 C4 H4B 0.9900 . ?
 O10B H10B 0.8400 . ?
 C4B H4BA 0.9900 . ?
 C4B H4BB 0.9900 . ?
 O21 H21A 0.8688 . ?
 O21 H21B 0.8702 . ?

loop_
  _geom_angle_atom_site_label_1
  _geom_angle_atom_site_label_2
  _geom_angle_atom_site_label_3
  _geom_angle
  _geom_angle_site_symmetry_1
  _geom_angle_site_symmetry_3
  _geom_angle_publ_flag
 O11 Zn1 O12 90.12(4) . . ?
 O11 Zn1 O13 85.33(4) . . ?
 O11 Zn1 N1 91.92(5) . . ?
 O11 Zn1 N2 174.36(5) . . ?
 O11 Zn1 N3 97.15(5) . . ?
 O13 Zn1 O12 84.41(4) . . ?
 N1 Zn1 O12 91.69(5) . . ?
 N1 Zn1 O13 175.22(5) . . ?
 N1 Zn1 N2 82.56(5) . . ?
 N1 Zn1 N3 99.44(6) . . ?
 N2 Zn1 O12 91.19(5) . . ?
 N2 Zn1 O13 100.26(5) . . ?
 N2 Zn1 N3 82.69(6) . . ?
 N3 Zn1 O12 166.45(5) . . ?
 N3 Zn1 O13 84.81(5) . . ?
 B1 O1 B3 117.80(11) . . ?
 B2 O1 B1 118.70(11) . . ?
 B2 O1 B3 115.67(10) . . ?
 B4 O2 B1 122.16(12) . . ?
 B4 O3 B2 123.08(12) . . ?
 B5 O4 B2 121.51(12) . . ?
 B5 O5 B3 120.92(12) . . ?
 B6 O6 B3 124.48(12) . . ?
 B6 O7 B1 120.08(13) . . ?
 B4 O8 H8 109.5 . . ?
 B5 O9 H9 109.5 . . ?
 Zn1 O11 H11 123.0(11) . . ?
 B1 O11 Zn1 123.80(9) . . ?
 B1 O11 H11 111.3(11) . . ?
 Zn1 O12 H12 121.4(10) . . ?
 B2 O12 Zn1 117.39(8) . . ?
 B2 O12 H12 105.6(10) . . ?
 Zn1 O13 H13 122.8(10) . . ?
 B3 O13 Zn1 117.87(8) . . ?
 B3 O13 H13 108.5(10) . . ?
 Zn1 N1 H1A 109.6 . . ?
 Zn1 N1 H1B 109.6 . . ?
 H1A N1 H1B 108.1 . . ?
 C1 N1 Zn1 110.50(11) . . ?
 C1 N1 H1A 109.6 . . ?
 C1 N1 H1B 109.6 . . ?
 Zn1 N2 H2 108.9 . . ?
 C2 N2 Zn1 106.43(10) . . ?
 C2 N2 H2 108.9 . . ?
 C3 N2 Zn1 108.60(11) . . ?
 C3 N2 H2 108.9 . . ?
 C3 N2 C2 114.95(15) . . ?
 Zn1 N3 H3AA 110.3 . . ?
 Zn1 N3 H3AB 110.3 . . ?
 Zn1 N3 H3BC 110.9 . . ?
 Zn1 N3 H3BD 110.9 . . ?
 H3AA N3 H3AB 108.5 . . ?
 H3BC N3 H3BD 108.9 . . ?
 C4 N3 Zn1 107.28(19) . . ?
 C4 N3 H3AA 110.3 . . ?
 C4 N3 H3AB 110.3 . . ?
 C4B N3 Zn1 104.14(15) . . ?
 C4B N3 H3BC 110.9 . . ?
 C4B N3 H3BD 110.9 . . ?
 N1 C1 H1C 109.6 . . ?
 N1 C1 H1D 109.6 . . ?
 N1 C1 C2 110.48(15) . . ?
 H1C C1 H1D 108.1 . . ?
 C2 C1 H1C 109.6 . . ?
 C2 C1 H1D 109.6 . . ?
 N2 C2 C1 111.46(15) . . ?
 N2 C2 H2A 109.3 . . ?
 N2 C2 H2B 109.3 . . ?
 C1 C2 H2A 109.3 . . ?
 C1 C2 H2B 109.3 . . ?
 H2A C2 H2B 108.0 . . ?
 N2 C3 H3BE 108.7 . . ?
 N2 C3 H3BF 108.7 . . ?
 N2 C3 H3AC 108.5 . . ?
 N2 C3 H3AD 108.5 . . ?
 N2 C3 C4B 114.22(19) . . ?
 H3BE C3 H3BF 107.6 . . ?
 H3AC C3 H3AD 107.5 . . ?
 C4 C3 N2 115.0(2) . . ?
 C4 C3 H3AC 108.5 . . ?
 C4 C3 H3AD 108.5 . . ?
 C4B C3 H3BE 108.7 . . ?
 C4B C3 H3BF 108.7 . . ?
 O2 B1 O1 110.05(11) . . ?
 O2 B1 O7 109.48(12) . . ?
 O2 B1 O11 113.15(12) . . ?
 O7 B1 O1 108.56(12) . . ?
 O7 B1 O11 111.19(13) . . ?
 O11 B1 O1 104.22(11) . . ?
 O3 B2 O1 107.57(11) . . ?
 O3 B2 O4 110.28(12) . . ?
 O3 B2 O12 111.15(12) . . ?
 O4 B2 O1 109.18(11) . . ?
 O4 B2 O12 110.42(12) . . ?
 O12 B2 O1 108.17(11) . . ?
 O5 B3 O1 109.24(11) . . ?
 O5 B3 O6 110.02(12) . . ?
 O5 B3 O13 111.20(12) . . ?
 O6 B3 O1 107.07(11) . . ?
 O6 B3 O13 110.73(12) . . ?
 O13 B3 O1 108.46(11) . . ?
 O2 B4 O3 122.59(13) . . ?
 O2 B4 O8 117.66(13) . . ?
 O3 B4 O8 119.73(13) . . ?
 O4 B5 O9 120.03(14) . . ?
 O5 B5 O4 123.21(14) . . ?
 O5 B5 O9 116.72(13) . . ?
 O6 B6 O10 119.2(2) . . ?
 O6 B6 O10B 116.7(2) . . ?
 O7 B6 O6 123.08(15) . . ?
 O7 B6 O10 116.6(2) . . ?
 O7 B6 O10B 118.0(2) . . ?
 B6 O10 H10 109.5 . . ?
 N3 C4 H4A 108.7 . . ?
 N3 C4 H4B 108.7 . . ?
 C3 C4 N3 114.2(3) . . ?
 C3 C4 H4A 108.7 . . ?
 C3 C4 H4B 108.7 . . ?
 H4A C4 H4B 107.6 . . ?
 B6 O10B H10B 109.5 . . ?
 N3 C4B H4BA 109.9 . . ?
 N3 C4B H4BB 109.9 . . ?
 C3 C4B N3 109.0(2) . . ?
 C3 C4B H4BA 109.9 . . ?
 C3 C4B H4BB 109.9 . . ?
 H4BA C4B H4BB 108.3 . . ?
 H21A O21 H21B 109.6 . . ?

loop_
  _geom_hbond_atom_site_label_D
  _geom_hbond_atom_site_label_H
  _geom_hbond_atom_site_label_A
  _geom_hbond_distance_DH
  _geom_hbond_distance_HA
  _geom_hbond_distance_DA
  _geom_hbond_angle_DHA
  _geom_hbond_site_symmetry_A
  _geom_hbond_publ_flag
 O8 H8 O3 0.84 1.86 2.6966(15) 171.5 2_656 yes
 O9 H9 O12 0.84 2.25 3.0286(15) 155.3 5_666 yes
 O11 H11 O10 0.857(9) 2.022(12) 2.770(3) 145.3(14) 4_656 yes
 O11 H11 O10B 0.857(9) 1.847(11) 2.663(4) 158.6(18) 4_656 yes
 O12 H12 O4 0.872(9) 2.064(10) 2.8732(14) 153.8(16) 5_666 yes
 O13 H13 O2 0.869(9) 2.089(9) 2.9557(14) 175.6(15) 6_565 yes
 N1 H1A O9 0.91 2.16 3.0619(18) 173.8 6_566 yes
 N1 H1B O10 0.91 2.43 3.190(3) 140.8 4_656 yes
 N2 H2 O8 1.00 2.01 2.9612(18) 158.2 6_565 yes
 N3 H3AA O7 0.91 2.26 3.156(2) 167.6 4_656 yes
 O10 H10 O6 0.84 1.88 2.714(3) 170.7 7_656 yes
 O10B H10B O6 0.84 1.80 2.639(4) 175.5 7_656 yes
 O21 H21A O7 0.87 2.45 3.087(4) 130.6 . yes
 O21 H21A O11 0.87 2.23 3.073(3) 163.9 . yes
 O21 H21B O7 0.87 1.92 2.758(3) 160.5 4_656 yes

loop_
  _geom_torsion_atom_site_label_1
  _geom_torsion_atom_site_label_2
  _geom_torsion_atom_site_label_3
  _geom_torsion_atom_site_label_4
  _geom_torsion
  _geom_torsion_site_symmetry_1
  _geom_torsion_site_symmetry_2
  _geom_torsion_site_symmetry_3
  _geom_torsion_site_symmetry_4
  _geom_torsion_publ_flag
 Zn1 O11 B1 O1 9.86(15) . . . . ?
 Zn1 O11 B1 O2 -109.67(12) . . . . ?
 Zn1 O11 B1 O7 126.63(11) . . . . ?
 Zn1 O12 B2 O1 -2.13(14) . . . . ?
 Zn1 O12 B2 O3 115.74(10) . . . . ?
 Zn1 O12 B2 O4 -121.54(10) . . . . ?
 Zn1 O13 B3 O1 4.74(14) . . . . ?
 Zn1 O13 B3 O5 124.88(10) . . . . ?
 Zn1 O13 B3 O6 -112.48(11) . . . . ?
 Zn1 N1 C1 C2 28.98(18) . . . . ?
 Zn1 N2 C2 C1 41.65(17) . . . . ?
 Zn1 N2 C3 C4 -24.3(3) . . . . ?
 Zn1 N2 C3 C4B 22.7(2) . . . . ?
 Zn1 N3 C4 C3 -34.0(4) . . . . ?
 Zn1 N3 C4B C3 47.4(3) . . . . ?
 N1 C1 C2 N2 -48.3(2) . . . . ?
 N2 C3 C4 N3 40.6(4) . . . . ?
 N2 C3 C4B N3 -48.6(3) . . . . ?
 C2 N2 C3 C4 94.7(3) . . . . ?
 C2 N2 C3 C4B 141.8(2) . . . . ?
 C3 N2 C2 C1 -78.61(19) . . . . ?
 B1 O1 B2 O3 -45.16(16) . . . . ?
 B1 O1 B2 O4 -164.83(11) . . . . ?
 B1 O1 B2 O12 74.98(15) . . . . ?
 B1 O1 B3 O5 162.33(11) . . . . ?
 B1 O1 B3 O6 43.22(16) . . . . ?
 B1 O1 B3 O13 -76.31(15) . . . . ?
 B1 O2 B4 O3 4.4(2) . . . . ?
 B1 O2 B4 O8 -177.42(13) . . . . ?
 B1 O7 B6 O6 -8.7(3) . . . . ?
 B1 O7 B6 O10 159.0(2) . . . . ?
 B1 O7 B6 O10B -171.1(3) . . . . ?
 B2 O1 B1 O2 41.52(17) . . . . ?
 B2 O1 B1 O7 161.32(12) . . . . ?
 B2 O1 B1 O11 -80.10(14) . . . . ?
 B2 O1 B3 O5 -48.83(15) . . . . ?
 B2 O1 B3 O6 -167.94(11) . . . . ?
 B2 O1 B3 O13 72.53(14) . . . . ?
 B2 O3 B4 O2 -9.8(2) . . . . ?
 B2 O3 B4 O8 172.09(13) . . . . ?
 B2 O4 B5 O5 11.5(2) . . . . ?
 B2 O4 B5 O9 -170.86(13) . . . . ?
 B3 O1 B1 O2 -170.60(11) . . . . ?
 B3 O1 B1 O7 -50.80(16) . . . . ?
 B3 O1 B1 O11 67.78(15) . . . . ?
 B3 O1 B2 O3 166.29(11) . . . . ?
 B3 O1 B2 O4 46.63(15) . . . . ?
 B3 O1 B2 O12 -73.57(14) . . . . ?
 B3 O5 B5 O4 -13.8(2) . . . . ?
 B3 O5 B5 O9 168.49(13) . . . . ?
 B3 O6 B6 O7 1.0(3) . . . . ?
 B3 O6 B6 O10 -166.4(2) . . . . ?
 B3 O6 B6 O10B 163.6(2) . . . . ?
 B4 O2 B1 O1 -19.42(19) . . . . ?
 B4 O2 B1 O7 -138.66(14) . . . . ?
 B4 O2 B1 O11 96.71(16) . . . . ?
 B4 O3 B2 O1 28.45(18) . . . . ?
 B4 O3 B2 O4 147.41(13) . . . . ?
 B4 O3 B2 O12 -89.79(16) . . . . ?
 B5 O4 B2 O1 -27.20(17) . . . . ?
 B5 O4 B2 O3 -145.18(13) . . . . ?
 B5 O4 B2 O12 91.60(15) . . . . ?
 B5 O5 B3 O1 31.30(18) . . . . ?
 B5 O5 B3 O6 148.56(13) . . . . ?
 B5 O5 B3 O13 -88.38(16) . . . . ?
 B6 O6 B3 O1 -17.5(2) . . . . ?
 B6 O6 B3 O5 -136.14(16) . . . . ?
 B6 O6 B3 O13 100.52(18) . . . . ?
 B6 O7 B1 O1 31.5(2) . . . . ?
 B6 O7 B1 O2 151.66(16) . . . . ?
 B6 O7 B1 O11 -82.58(19) . . . . ?

_shelx_res_file
;
TITL 2016ncs0789cap2_new2b_a.res in C2/c
    2016ncs0789n.res
    created by SHELXL-2018/3 at 10:45:56 on 22-Feb-2019
REM Old TITL 2016ncs0789CAP2_new2b in C2/c
REM SHELXT solution in C2/c: R1 0.107, Rweak 0.021, Alpha 0.042
REM <I/s> 1.222 for 211 systematic absences, Orientation as input
REM Formula found by SHELXT: C11 B3 N4 O10 Zn
CELL 0.71075 26.0212 9.1562 13.6318 90 99.58 90
ZERR 8 0.0003 0.0001 0.0002 0 0.001 0
LATT 7
SYMM -X,+Y,0.5-Z
SFAC C H B N O Zn
UNIT 32 160 48 24 108 8
EQIV $1 1-X,+Y,1.5-Z
EQIV $2 1.5-X,0.5+Y,1.5-Z
EQIV $3 1.5-X,0.5-Y,1-Z
EQIV $4 1-X,1-Y,1-Z
EQIV $5 +X,1-Y,-0.5+Z
EQIV $6 +X,1-Y,0.5+Z
DFIX 0.87 0.01 O12 H12
DFIX 0.87 0.01 O13 H13
DFIX 0.87 0.01 O11 H11
SADI N3 C4B N3 C4
SADI C4 C3 C4B C3
SADI O10 B6 O10B B6
DANG 1.951291 0.02 B2 H12
DANG 2.854795 0.02 Zn1 H12
DANG 1.940273 0.02 B3 H13
DANG 2.828898 0.02 Zn1 H13
DANG 1.932104 0.02 B1 H11
DANG 2.678207 0.02 Zn1 H11

L.S. 99
PLAN  20
SIZE 0.08 0.22 0.42
TEMP -173(2)
HTAB O12 O4_$4
HTAB O13 O2_$5
HTAB O8 O3_$1
HTAB O11 O10_$2
HTAB O11 O10B_$2
HTAB O9 O12_$4
HTAB N2 O8_$5
HTAB N1 O9_$6
HTAB N1 O10_$2
HTAB N3 O7_$2
HTAB O10 O6_$3
HTAB O21 O11
HTAB O21 O7
HTAB O21 O7_$2
HTAB O10B O6_$3
BOND $H
CONF
MORE -1
fmap 2 53
acta
REM <olex2.extras>
REM <HklSrc "%.\\2016ncs0789CAP2_new2b.hkl">
REM </olex2.extras>

WGHT    0.032900    5.536500
FVAR       0.26845
ZN1   6    0.637427    0.712384    0.614889    11.00000    0.01326    0.00926 =
         0.01086    0.00125   -0.00044   -0.00202
O1    5    0.624532    0.386696    0.611632    11.00000    0.00499    0.01035 =
         0.00582    0.00071    0.00083    0.00095
O2    5    0.630994    0.359698    0.790646    11.00000    0.00772    0.01493 =
         0.00652    0.00056    0.00090    0.00074
O3    5    0.547518    0.371009    0.685407    11.00000    0.00683    0.01421 =
         0.00741    0.00178    0.00151    0.00044
O4    5    0.539587    0.367339    0.509081    11.00000    0.00705    0.01188 =
         0.00723   -0.00063    0.00005    0.00023
O5    5    0.616586    0.341478    0.435068    11.00000    0.00889    0.01262 =
         0.00744   -0.00112    0.00083    0.00135
O6    5    0.699738    0.331121    0.537861    11.00000    0.00801    0.01932 =
         0.00772    0.00237    0.00180    0.00427
O7    5    0.705201    0.315727    0.714765    11.00000    0.01015    0.03099 =
         0.00793    0.00433    0.00168    0.00982
O8    5    0.555209    0.310309    0.856213    11.00000    0.00714    0.02314 =
         0.00890    0.00433    0.00155    0.00181
AFIX 147
H8    2    0.522744    0.320208    0.841554    11.00000   -1.50000
AFIX   0
O9    5    0.535172    0.299395    0.339607    11.00000    0.01010    0.02656 =
         0.01044   -0.00503   -0.00042    0.00036
AFIX 147
H9    2    0.503608    0.318579    0.339641    11.00000   -1.50000
AFIX   0
O11   5    0.671933    0.560510    0.716622    11.00000    0.02155    0.01451 =
         0.00890    0.00175   -0.00634   -0.00733
H11   2    0.689033    0.583987    0.773739    11.00000   -1.50000
O12   5    0.564222    0.590500    0.597680    11.00000    0.00776    0.00934 =
         0.01100    0.00022   -0.00107    0.00143
H12   2    0.538366    0.610959    0.550252    11.00000   -1.50000
O13   5    0.656806    0.562975    0.503673    11.00000    0.01247    0.01196 =
         0.00703    0.00180    0.00089   -0.00091
H13   2    0.649687    0.580879    0.440263    11.00000   -1.50000
N1    4    0.615060    0.844674    0.729057    11.00000    0.02176    0.01885 =
         0.01372   -0.00120    0.00304   -0.00444
AFIX  23
H1A   2    0.591360    0.795857    0.758825    11.00000   -1.20000
H1B   2    0.643436    0.863644    0.776035    11.00000   -1.20000
AFIX   0
N2    4    0.601143    0.884030    0.521383    11.00000    0.02223    0.01369 =
         0.01406    0.00242   -0.00049   -0.00044
AFIX  13
H2    2    0.579458    0.839874    0.461242    11.00000   -1.20000
AFIX   0
N3    4    0.707429    0.824206    0.594577    11.00000    0.01842    0.02283 =
         0.02856    0.00299   -0.00116   -0.00680
PART 1
AFIX  23
H3AA  2    0.729490    0.831808    0.653606    10.50000   -1.20000
H3AB  2    0.723909    0.774300    0.551125    10.50000   -1.20000
AFIX  23
PART 0
PART 2
H3BC  2    0.716885    0.891047    0.643668    10.50000   -1.20000
H3BD  2    0.734110    0.760057    0.594235    10.50000   -1.20000
AFIX   0
PART 0
C1    1    0.592239    0.983099    0.687473    11.00000    0.03883    0.02024 =
         0.02494   -0.00249    0.00974    0.00292
AFIX  23
H1C   2    0.619901    1.058068    0.691002    11.00000   -1.20000
H1D   2    0.566124    1.017791    0.727294    11.00000   -1.20000
AFIX   0
C2    1    0.566361    0.962449    0.579851    11.00000    0.02842    0.02091 =
         0.02710    0.00364    0.00445    0.00664
AFIX  23
H2A   2    0.533697    0.906273    0.577882    11.00000   -1.20000
H2B   2    0.557246    1.059120    0.549318    11.00000   -1.20000
AFIX   0
C3    1    0.642232    0.974695    0.489533    11.00000    0.03409    0.02789 =
         0.03146    0.01547    0.00703   -0.00275
PART 2
AFIX  23
H3BE  2    0.647556    1.062524    0.532380    10.50000   -1.20000
H3BF  2    0.630086    1.007922    0.420456    10.50000   -1.20000
AFIX  23
PART 0
PART 1
H3AC  2    0.647294    0.942354    0.422500    10.50000   -1.20000
H3AD  2    0.630004    1.077208    0.483798    10.50000   -1.20000
AFIX   0
PART 0
B1    3    0.658842    0.405465    0.712239    11.00000    0.00634    0.01448 =
         0.00656    0.00150   -0.00082    0.00013
B2    3    0.567577    0.429255    0.600499    11.00000    0.00588    0.01022 =
         0.00801    0.00037    0.00064    0.00045
B3    3    0.649593    0.406236    0.519160    11.00000    0.00720    0.01227 =
         0.00664    0.00135    0.00103    0.00103
B4    3    0.577960    0.348869    0.776216    11.00000    0.00962    0.00929 =
         0.00974    0.00030    0.00180    0.00156
B5    3    0.563987    0.338549    0.429556    11.00000    0.01053    0.00919 =
         0.00989    0.00046    0.00049    0.00050
B6    3    0.724922    0.291174    0.629726    11.00000    0.01391    0.04066 =
         0.01036    0.00548    0.00277    0.01305
PART 1
O10   5    0.776655    0.249149    0.641071    10.50000    0.00737    0.01887 =
         0.00634    0.00084    0.00105    0.00447
AFIX 147
H10   2    0.784848    0.234167    0.584869    10.50000   -1.50000
AFIX   0
C4    1    0.692129    0.970402    0.555057    10.50000    0.04288    0.03361 =
         0.02964    0.00451    0.00636   -0.01950
AFIX  23
H4A   2    0.690867    1.037433    0.611591    10.50000   -1.20000
H4B   2    0.719279    1.007025    0.518318    10.50000   -1.20000
AFIX   0
PART 0
PART 2
O10B  5    0.765389    0.186660    0.632802    10.50000    0.02240    0.04688 =
         0.00948    0.00579    0.00508    0.02364
AFIX 147
H10B  2    0.774924    0.182541    0.576947    10.50000   -1.50000
AFIX   0
C4B   1    0.693069    0.898899    0.493657    10.50000    0.02180    0.01725 =
         0.02577    0.00527    0.00820   -0.00530
AFIX  23
H4BA  2    0.720378    0.970362    0.484220    10.50000   -1.20000
H4BB  2    0.690521    0.825396    0.439802    10.50000   -1.20000
AFIX   6

PART 0
PART 1
O21   5    0.786383    0.551366    0.686870    10.50000    0.02626    0.04271 =
         0.07834   -0.03116    0.02064   -0.01032
H21A  2    0.753433    0.538047    0.688028    10.50000   -1.50000
H21B  2    0.796822    0.630959    0.719007    10.50000   -1.50000
AFIX   0
HKLF 4


REM  2016ncs0789cap2_new2b_a.res in C2/c
REM wR2 = 0.0666, GooF = S = 1.095, Restrained GooF = 1.105 for all data
REM R1 = 0.0240 for 3541 Fo > 4sig(Fo) and 0.0249 for all 3651 data
REM 287 parameters refined using 12 restraints

END

WGHT      0.0329      5.5364

REM Highest difference peak  0.349,  deepest hole -0.303,  1-sigma level  0.065
Q1    1   0.6780  1.0351  0.4768  11.00000  0.05    0.35
Q2    1   0.6606  0.9175  0.4647  11.00000  0.05    0.34
Q3    1   0.5577  0.3945  0.6463  11.00000  0.05    0.32
Q4    1   0.6150  0.9129  0.5043  11.00000  0.05    0.32
Q5    1   0.6410  1.0499  0.4450  11.00000  0.05    0.31
Q6    1   0.6023  0.4156  0.6066  11.00000  0.05    0.31
Q7    1   0.6841  0.3686  0.5367  11.00000  0.05    0.30
Q8    1   0.5654  0.5114  0.5977  11.00000  0.05    0.29
Q9    1   0.6005  0.9031  0.7104  11.00000  0.05    0.28
Q10   1   0.6382  0.3769  0.7516  11.00000  0.05    0.28
Q11   1   0.7150  0.3177  0.6805  11.00000  0.05    0.28
Q12   1   0.6382  0.4012  0.6566  11.00000  0.05    0.28
Q13   1   0.6867  0.3598  0.7065  11.00000  0.05    0.28
Q14   1   0.6055  0.3397  0.7773  11.00000  0.05    0.27
Q15   1   0.6357  0.4044  0.5752  11.00000  0.05    0.27
Q16   1   0.6726  0.4888  0.7183  11.00000  0.05    0.26
Q17   1   0.5581  0.3545  0.7196  11.00000  0.05    0.25
Q18   1   0.6584  0.4902  0.5110  11.00000  0.05    0.25
Q19   1   0.5994  1.0082  0.5784  11.00000  0.05    0.25
Q20   1   0.7159  0.3307  0.5790  11.00000  0.05    0.25
;
_shelx_res_checksum                45284
_shelx_hkl_file
;
   0   0  -3    0.80    0.25
   0   0   3    0.40    0.24
   0   0   4  592.05   13.27
   0   0  -4  596.48   12.19
   0   0   4  619.98   12.29
   0   0   5    0.54    0.31
   0   0   5    0.73    0.58
   0   0  -5   -0.08    0.26
   0   0  -6    6.07    0.65
   0   0   6    7.01    1.20
   0   0   6    7.74    0.77
   0   0   7    0.13    0.74
   0   0  -7    0.22    0.41
   0   0   7    0.77    0.49
   0   0   8 2166.32   44.54
   0   0  -8 2221.38   41.95
   0   0  -9    0.15    0.40
   0   0   9    0.21    0.84
   0   0  10 2732.87   55.77
   0   0 -10 2614.39   51.99
   0   0  11    0.89    1.32
   0   0 -11    1.26    0.56
   0   0  12  713.85   19.21
   0   0 -12  725.32   15.20
   0   0  13    3.13    1.63
   0   0 -13    0.10    0.46
   0   0  14    8.87    2.09
   0   0  15    0.13    1.75
   0   0  16    7.36    2.48
   0   0  17   -0.86    1.84
   0   2   1 2313.38   44.07
   0   2  -1 2332.34   44.12
   0  -2   2  437.92    8.98
   0   2   2  427.67    8.93
   0   2   2  431.42    8.96
   0  -2  -2  434.37    9.04
   0  -2  -2  420.28    9.12
   0  -2   2  421.98    8.84
   0  -2  -2  457.43    9.19
   0  -2   3 1592.26   30.08
   0   2  -3 1547.24   30.08
   0   2   3 1480.59   30.35
   0  -2  -3 1520.33   30.57
   0  -2  -3 1569.08   30.68
   0   2   3 1456.67   30.29
   0   2   5  464.58   11.20
   0   2   5  463.30   11.19
   0  -2  -5  481.14   11.58
   0   2  -5  495.20   10.23
   0  -2   5  487.37   10.33
   0  -2   6  195.15    5.09
   0   2   6  195.35    5.99
   0   2   6  191.83    5.99
   0   2  -6  192.93    4.86
   0  -2  -6  201.31    6.34
   0  -2  -7  641.68   14.95
   0   2   7  565.26   14.16
   0  -2   7  575.11   12.88
   0  -2  -7  608.47   13.54
   0   2   7  578.69   14.16
   0   2  -7  613.04   12.57
   0  -2  -8 1215.05   24.24
   0  -2  -8 1194.49   25.93
   0  -2   8 1150.56   23.51
   0   2  -8 1141.82   22.87
   0   2   8 1077.44   24.97
   0   2   8 1123.92   25.16
   0  -2   9   37.71    2.05
   0   2  -9   37.91    1.76
   0  -2  -9   36.73    2.27
   0   2   9   36.91    2.77
   0   2   9   37.55    2.72
   0   2  10  127.96    5.63
   0   2 -10  135.00    3.93
   0  -2 -10  129.79    4.71
   0  -2  10  129.62    4.38
   0   2  10  145.55    6.03
   0   2  11  333.64   10.56
   0  -2 -11  324.82    8.75
   0  -2  11  317.24    8.28
   0   2 -11  323.60    7.64
   0   2  12  717.07   19.14
   0  -2 -12  727.19   16.69
   0   2  12  757.22   19.39
   0  -2  12  715.16   19.89
   0  -2  12  734.08   16.22
   0   2 -12  732.79   15.41
   0  -2  13    4.96    2.10
   0   2  13    2.73    1.68
   0  -2  13    2.87    0.82
   0   2  13    0.66    1.39
   0   2 -13    1.71    0.59
   0  -2 -13    2.85    0.93
   0   2  14   92.69    5.75
   0  -2 -14   92.82    3.82
   0  -2  14   92.73    6.18
   0   2  14   96.77    5.80
   0   2  15  262.46   10.51
   0  -2  15  251.77   10.96
   0   2  15  255.12   10.42
   0  -2  16   27.39    3.76
   0   2  16   29.53    3.60
   0   2  16   28.44    3.61
   0   2  17    2.99    2.14
   0   2  17    3.08    2.13
   0  -2  17    2.10    2.06
   0   4   0 1876.44   37.31
   0  -4   0 1941.51   37.49
   0   4   0 1853.43   37.35
   0   4   0 1895.58   37.59
   0   4  -1   83.64    2.84
   0   4   1   74.28    2.69
   0  -4  -1   73.31    2.77
   0   4   1   71.08    2.74
   0   4  -1   71.79    2.84
   0  -4  -1   77.44    2.72
   0  -4   1   77.04    2.56
   0  -4   1   73.41    2.65
   0  -4  -2   64.32    2.67
   0  -4  -2   63.84    2.44
   0   4  -2   62.65    2.58
   0  -4  -2   63.52    2.60
   0   4   2   64.29    2.70
   0  -4   2   64.32    2.37
   0  -4   2   70.34    2.54
   0  -4   2   64.03    2.78
   0   4   2   63.30    2.39
   0   4   3 3419.65   65.46
   0  -4  -3 3646.42   66.55
   0   4  -3 3317.65   66.11
   0  -4   3 3301.20   66.00
   0  -4  -3 3394.07   66.20
   0  -4   3 3561.09   65.79
   0   4   3 3461.80   65.63
   0  -4  -3 3669.10   65.96
   0  -4   3 3269.54   65.47
   0  -4  -4 2449.78   50.15
   0  -4  -4 2463.17   49.54
   0   4  -4 2732.38   50.18
   0  -4   4 2506.66   49.16
   0  -4   4 2544.74   49.34
   0   4   4 2522.39   49.31
   0  -4  -4 2604.98   50.13
   0  -4   4 2627.54   49.59
   0   4   4 2502.89   49.24
   0  -4   5  654.67   14.24
   0   4   5  659.41   14.44
   0   4   5  639.83   14.31
   0  -4  -5  654.74   15.25
   0  -4  -5  662.05   15.11
   0  -4   5  657.85   14.24
   0  -4  -5  608.22   14.44
   0  -4   5  616.55   14.13
   0   4   6    2.54    0.86
   0   4   6    0.19    0.65
   0  -4  -6    0.24    0.68
   0  -4  -6    0.24    0.61
   0  -4   6    2.29    0.87
   0  -4   6    0.50    0.56
   0  -4   7  600.55   13.80
   0  -4   7  568.51   13.28
   0   4   7  587.25   14.03
   0   4   7  579.24   13.85
   0  -4  -7  594.09   15.02
   0  -4  -7  560.36   13.90
   0   4   8  291.78    8.43
   0   4   8  259.08    8.07
   0  -4   8  279.90    8.06
   0  -4   8  271.15    7.50
   0  -4  -8  251.50    8.00
   0  -4  -8  277.52    9.08
   0  -4   9    4.02    1.10
   0  -4  -9    4.56    1.14
   0   4   9    2.70    1.08
   0   4   9    2.69    0.91
   0  -4   9    3.88    0.86
   0  -4  -9    3.16    1.17
   0  -4 -10   70.54    4.58
   0   4  10   75.89    4.10
   0  -4 -10   82.87    4.25
   0  -4  10   73.43    3.52
   0   4  10   80.50    4.36
   0  -4  10   75.69    4.01
   0   4  11   36.76    3.06
   0  -4  11   34.02    2.37
   0  -4 -11   34.22    2.81
   0   4  11   32.00    2.78
   0   4  12   52.18    3.82
   0   4  12   46.75    3.50
   0  -4 -12   51.05    3.41
   0  -4  12   48.01    2.89
   0  -4  13   36.17    2.54
   0  -4 -13   38.35    3.03
   0   4  13   40.43    3.54
   0   4  13   36.53    3.41
   0   4  14   84.34    5.27
   0  -4  14   77.29    3.73
   0   4  14   83.17    5.31
   0   4  15  622.93   17.98
   0   4  15  603.57   17.83
   0  -4  16  100.84    7.28
   0  -4 -16   81.66    5.46
   0   4  16  102.51    6.33
   0   4  16   94.85    6.10
   0   6   0  165.66    5.42
   0  -6   0  166.51    5.05
   0  -6   0  173.80    5.33
   0   6   0  169.22    5.34
   0   6   0  162.88    5.12
   0   6   1 2230.32   41.98
   0  -6   1 2064.50   42.02
   0  -6  -1 2146.07   42.20
   0   6   1 2094.30   42.50
   0  -6  -1 2219.99   42.65
   0   6  -1 2174.10   42.37
   0   6  -1 2126.34   42.75
   0  -6   1 2240.45   41.87
   0   6   1 2038.05   42.19
   0  -6   1 2122.22   43.01
   0   6  -1 2179.96   42.19
   0   6   2   92.15    3.38
   0   6  -2   91.27    3.81
   0  -6   2   90.17    3.99
   0   6   2   98.95    3.67
   0   6  -2   87.35    3.89
   0   6   2   83.58    3.76
   0  -6   2   92.43    3.36
   0  -6   2   98.06    3.59
   0  -6  -2   93.29    3.80
   0   6   3  184.87    5.35
   0  -6   3  184.17    5.32
   0  -6   3  183.85    5.57
   0   6   3  181.50    5.52
   0  -6  -3  182.56    6.09
   0   6  -3  178.66    6.07
   0  -6  -3  195.42    6.34
   0  -6   3  189.83    6.14
   0  -6  -4  131.46    4.59
   0  -6   4  130.85    4.53
   0   6  -4  130.53    5.09
   0  -6  -4  127.73    5.25
   0  -6   4  131.84    4.36
   0  -6  -4  132.96    5.14
   0   6   4  134.55    4.52
   0  -6   4  126.99    4.88
   0  -6   5  220.32    6.80
   0  -6  -5  211.38    6.49
   0   6   5  205.17    6.11
   0  -6  -5  214.01    7.46
   0   6   5  205.30    6.21
   0  -6   5  205.12    6.06
   0  -6  -5  205.46    7.14
   0   6  -5  204.08    7.07
   0  -6   5  214.68    6.38
   0  -6   6   21.81    1.74
   0  -6  -6   19.20    2.19
   0   6   6   17.93    1.73
   0  -6  -6   19.89    2.14
   0  -6   6   19.60    1.89
   0   6   6   19.08    1.70
   0  -6  -6   17.25    1.76
   0  -6   6   19.89    1.76
   0  -6   7  299.32    8.48
   0  -6   7  303.52    8.83
   0  -6  -7  308.62    8.99
   0  -6   7  322.73    8.89
   0  -6  -7  308.96   10.17
   0   6   7  317.07    8.68
   0   6   7  284.08    8.47
   0  -6  -8  422.14   11.51
   0  -6   8  394.47   10.88
   0   6   8  434.78   11.24
   0   6   8  404.97   11.08
   0  -6   8  430.07   11.36
   0  -6  -8  414.86   12.84
   0   6   9  107.32    4.80
   0   6   9  105.38    4.78
   0  -6   9  106.82    4.80
   0  -6  -9  113.94    5.08
   0  -6  10  259.91    8.48
   0   6  10  257.42    8.58
   0   6  10  281.98    8.89
   0  -6 -10  274.63    9.10
   0   6  11 1638.81   35.37
   0  -6 -11 1636.06   35.61
   0  -6  11 1651.77   34.92
   0   6  11 1667.07   35.31
   0   6  12    0.72    1.37
   0  -6 -12    1.99    1.47
   0  -6 -12    0.25    1.21
   0  -6  12   -0.12    1.02
   0   6  12    1.73    1.38
   0   6  13   64.16    4.37
   0   6  13   59.93    4.14
   0  -6 -13   52.36    4.00
   0  -6  13   57.73    3.77
   0  -6 -14   71.40    4.91
   0   6  14   74.56    4.80
   0   6  14   75.24    5.00
   0   6  15  167.12    7.80
   0   6  15  169.44    7.70
   0  -8   0  363.46   10.02
   0   8   0  349.66   10.16
   0   8   0  345.67    9.94
   0  -8   0  363.94   10.69
   0   8   0  366.61    9.82
   0  -8   0  343.98    9.55
   0  -8  -1  811.55   18.73
   0   8  -1  823.54   19.48
   0  -8   1  803.29   19.61
   0   8  -1  825.88   18.82
   0   8   1  821.71   18.96
   0   8   1  834.29   18.49
   0   8  -1  858.18   19.05
   0  -8   1  824.07   18.69
   0  -8  -1  820.09   19.19
   0   8   1  789.49   19.09
   0  -8  -1  830.47   19.86
   0  -8   1  786.58   18.20
   0   8   2    1.40    0.92
   0  -8   2    4.86    1.31
   0  -8  -2    1.38    1.05
   0   8  -2    0.05    0.71
   0  -8  -2    4.36    1.32
   0  -8   2    1.28    0.85
   0   8   2    0.58    1.00
   0   8  -2    2.07    1.11
   0  -8   2    0.65    0.71
   0   8   3  233.00    6.93
   0   8   3  236.75    7.36
   0  -8  -3  232.36    7.92
   0   8  -3  254.96    7.34
   0  -8   3  224.60    6.80
   0  -8  -3  230.58    8.15
   0   8  -3  231.92    7.97
   0  -8   4  212.38    7.52
   0   8  -4  208.38    7.69
   0  -8  -4  209.31    7.63
   0   8   4  219.71    6.58
   0   8   4  212.43    6.84
   0   8   5  131.51    4.81
   0  -8   5  138.20    5.83
   0  -8   5  123.24    4.70
   0   8   5  128.32    5.00
   0   8  -5  128.94    5.94
   0  -8  -5  126.53    5.90
   0  -8   6  116.33    5.23
   0   8   6  112.41    4.63
   0   8   6  108.42    4.42
   0  -8  -6  109.80    4.84
   0  -8   6  100.89    4.28
   0  -8  -6   95.71    5.30
   0  -8   7  646.87   16.67
   0  -8  -7  645.61   16.21
   0   8   7  665.13   15.92
   0  -8  -8   46.37    3.26
   0  -8   8   46.63    3.40
   0   8   8   52.69    3.14
   0   8   9    4.48    1.32
   0   8   9    3.80    1.17
   0  -8   9    4.63    1.41
   0  -8  -9    6.81    1.71
   0   8  10    2.72    1.17
   0   8  10    2.54    1.34
   0  -8 -10    2.59    1.37
   0  -8 -11  331.64   10.91
   0   8  11  323.39   10.29
   0  -8  11  316.04   10.84
   0   8  11  348.88   10.62
   0  -8  12   10.26    1.97
   0  -8 -12   10.61    2.23
   0   8  12    9.36    1.93
   0   8  12   10.68    2.11
   0  10   0  179.39    6.82
   0 -10   0  173.17    7.45
   0  10   0  175.93    7.23
   0  10  -1   23.58    2.46
   0 -10   1   23.20    2.73
   0  10   1   20.07    2.44
   0  10   1   21.94    2.27
   0  10  -1   22.46    2.65
   0 -10  -1   20.93    2.64
   0  10  -2   20.30    2.48
   0 -10   2   22.37    2.64
   0  10  -2   17.25    1.99
   0  10   2   21.27    2.19
   0 -10  -2   23.49    2.81
   0  10   2   18.52    2.27
   0  10  -3  123.60    5.38
   0 -10  -3  117.07    6.13
   0 -10   3  115.18    5.93
   0  10   3  119.68    5.55
   0  10  -3  127.78    6.18
   0  10   3  132.58    5.33
   0 -10   4  726.95   19.13
   0  10   4  748.51   18.29
   0 -10  -4  702.64   19.28
   0  10   4  745.85   17.72
   0  10  -4  724.85   19.41
   0  10   5   62.85    3.57
   0 -10  -5   53.78    4.15
   0  10  -5   60.63    4.49
   0 -10   5   66.44    4.42
   0  10   5   56.26    3.72
   0  10   6    5.23    1.66
   0 -10   6    6.23    1.81
   0 -10  -6    5.48    1.93
   0  10   6    3.50    1.27
   0  10   7  321.31   10.04
   0 -10  -7  298.47   10.89
   0  10   7  320.11    9.55
   0 -10   7  306.92   10.75
   0  10   8  342.90   10.67
   0 -10  -8  329.65   11.66
   0 -10   8  362.18   11.81
   0  10   8  347.34   10.30
   0 -10   9   91.87    5.58
   0  10   9   99.75    4.89
   0  10   9  100.40    5.16
   0 -10  -9   96.93    5.73
  -1   1  17  271.76   11.74
  -1   1  17  279.01   11.96
  -1  -1  17  291.37   12.49
  -1  -1  16   20.45    3.33
  -1   1  16   22.04    3.13
  -1   1  16   21.63    3.19
  -1  -1  15   31.78    3.71
  -1   1  15   31.66    3.74
  -1   1  15   28.42    3.42
  -1  -1  14    9.30    2.30
   1   1 -14    6.24    0.66
  -1   1  14    7.68    2.03
   1  -1 -14    6.29    0.85
   1  -1 -13  255.75    6.70
   1   1 -13  271.77    6.18
  -1   1  13  271.58   10.13
  -1  -1  13  268.74   10.34
   1   1 -12  120.63    3.37
  -1   1  12  122.72    6.13
   1  -1 -12  116.82    3.86
  -1  -1  12  130.02    6.40
   1   1 -11  108.17    3.08
   1  -1 -11  102.80    3.55
  -1   1  11  102.84    5.33
  -1  -1  11  101.37    5.54
   1  -1 -10 1443.43   28.93
   1   1 -10 1474.11   28.13
  -1  -1  10 1524.74   28.79
  -1   1  10 1426.08   31.92
  -1  -1  10 1358.41   32.03
   1   1  -9 1394.94   25.22
   1  -1  -9 1370.49   26.09
  -1  -1   9 1222.92   25.58
  -1   1   9 1309.70   28.54
  -1  -1   9 1264.99   28.71
  -1  -1   8   25.56    1.39
   1  -1  -8   24.04    1.47
   1   1  -8   25.35    1.16
  -1   1   8   24.81    2.16
   1   1  -7 1442.41   26.69
  -1  -1   7 1409.17   27.09
   1  -1  -7 1413.42   27.46
  -1   1   7 1364.28   29.14
   1   1  -6    1.87    0.34
   1  -1  -6    0.72    0.44
  -1   1   6    0.44    0.71
   1  -1  -6    1.53    0.75
  -1  -1   6    0.98    0.38
  -1  -1   5  565.91   11.63
   1  -1  -5  571.65   13.27
   1   1  -5  591.22   11.46
  -1   1   5  576.87   13.12
   1  -1  -5  595.99   12.08
   1   1  -4  610.80   12.05
   1  -1  -4  640.78   13.57
  -1  -1   4  624.75   12.18
  -1   1   4  593.02   13.33
   1  -1  -2  222.10    4.86
   1  -1  -2  216.01    4.80
  -1  -1   2  219.04    4.28
  -1   1   2  217.84    4.75
   1  -1  -1    5.74    0.42
  -1   1   1    5.16    0.40
   1  -1   1  938.59   17.50
  -1  -1  -1  919.94   17.48
  -1  -1  -1  922.21   17.47
  -1  -1  -2  386.02    8.07
   1  -1   2  360.53    7.86
   1  -1   2  368.81    7.71
   1   1   2  381.64    7.98
  -1   1  -2  379.63    7.66
   1  -1   3 1266.76   24.75
  -1   1  -3 1295.55   24.66
  -1  -1  -3 1325.78   25.16
  -1  -1  -4  131.67    4.09
   1   1   4  121.04    3.91
   1  -1   4  126.79    3.43
  -1  -1  -4  129.73    3.67
  -1   1  -4  127.10    3.26
  -1  -1  -5  688.87   15.35
  -1  -1  -5  683.67   14.52
   1   1   5  671.15   15.15
   1  -1   5  693.67   14.24
  -1   1  -5  694.51   13.93
  -1   1  -6    2.51    0.49
   1  -1   6    2.02    0.51
  -1  -1  -6    1.71    0.59
  -1   1  -7  759.75   15.46
  -1  -1  -7  746.37   16.15
   1  -1   7  769.23   15.98
   1   1   7  734.47   17.27
  -1  -1  -8  334.56    8.33
   1  -1   8  334.94    8.21
  -1   1  -8  338.15    7.64
   1  -1   9 1367.33   27.84
  -1   1  -9 1369.34   27.09
  -1  -1  -9 1362.61   27.98
   1   1   9 1386.88   29.99
   1  -1  10    9.28    1.69
   1  -1  10   11.50    1.31
  -1  -1 -10   11.60    1.27
   1   1  10   11.29    1.86
  -1   1 -10    8.09    0.88
  -1   1 -11  125.54    3.86
  -1  -1 -11  123.47    4.39
   1   1  11  122.64    5.94
   1  -1  11  126.73    6.21
   1  -1  11  130.46    4.45
  -1  -1 -12  387.35    9.73
   1   1  12  396.83   12.44
   1  -1  12  385.52   12.66
  -1   1 -12  387.34    9.03
  -1  -1 -13   64.04    2.96
   1  -1  13   60.23    4.63
   1   1  13   65.35    4.64
  -1   1 -13   63.29    2.54
   1   1  14    0.22    1.65
  -1   1 -14    0.85    0.60
  -1  -1 -14    0.54    0.67
   1  -1  14    0.09    1.38
   1   1  15  474.50   15.50
   1  -1  15  460.06   15.75
   1   1  16    2.24    1.89
   1  -1  16    2.57    1.66
   1   1  17   67.59    5.60
   1   1  17   69.33    5.68
   1  -1  17   66.74    5.82
  -1   3  16   19.22    3.03
  -1   3  16   22.20    3.12
  -1  -3  16   19.83    3.54
  -1  -3  15   27.48    3.71
  -1   3  15   30.23    3.45
  -1   3  15   32.79    3.63
  -1  -3  14  147.55    7.93
  -1   3  14  138.95    7.04
  -1   3  14  149.49    7.22
  -1  -3  14  148.08    4.72
   1  -3 -14  135.41    5.28
  -1   3  13  678.84   18.39
  -1   3  13  693.86   18.43
   1  -3 -13  640.26   15.89
  -1  -3  13  683.88   15.15
  -1   3  12  138.02    6.46
  -1  -3  12  140.24    4.77
  -1   3  12  153.71    6.74
   1  -3 -12  137.26    5.30
  -1  -3  11  338.69    8.81
   1  -3 -11  353.71    9.66
  -1   3  11  334.62   10.73
  -1   3  11  340.65   10.74
  -1   3  10  590.73   15.13
   1  -3 -10  576.51   15.93
  -1  -3  10  580.02   13.21
  -1  -3  10  573.05   14.63
  -1   3  10  550.26   14.87
   1  -3 -10  574.94   14.05
  -1  -3   9   54.79    3.18
   1  -3  -9   50.65    2.81
  -1   3   9   51.75    3.28
   1  -3  -9   52.18    3.60
  -1   3   9   47.48    3.14
  -1  -3   9   49.88    2.43
  -1   3   8    1.74    0.98
  -1   3   8    1.28    0.91
  -1  -3   8    1.53    0.57
  -1  -3   8    0.47    0.73
   1  -3  -8    1.87    1.03
  -1  -3   7  238.17    6.97
   1  -3  -7  240.37    7.76
  -1   3   7  239.77    7.25
  -1   3   7  237.23    7.17
  -1  -3   7  234.27    6.18
  -1  -3   6   62.12    2.82
  -1  -3   6   64.11    2.49
   1  -3  -6   67.27    3.38
  -1   3   6   61.74    2.94
  -1   3   6   65.11    3.03
  -1   3   5  632.25   14.25
   1  -3  -5  658.51   14.38
  -1  -3   5  626.54   14.03
   1  -3  -5  666.42   15.00
  -1  -3   5  644.33   13.62
  -1   3   4  514.56   11.45
   1  -3  -4  510.95   11.95
  -1  -3   4  490.46   11.17
   1  -3  -4  525.95   11.93
  -1  -3   4  513.93   11.12
  -1   3   4  505.46   11.46
   1  -3  -4  534.60   11.61
  -1   3   3  632.57   13.57
  -1  -3   3  646.82   13.67
  -1  -3   3  662.78   13.45
  -1  -3   3  650.66   13.53
   1  -3  -3  644.45   14.05
   1  -3  -3  670.80   13.79
  -1   3   3  650.07   13.56
   1  -3  -3  638.92   13.96
   1   3  -3  616.33   13.73
   1  -3  -2  301.98    7.13
  -1  -3   2  285.65    6.74
  -1   3   2  289.40    6.76
   1   3  -2  303.39    6.93
  -1  -3   2  295.75    6.61
  -1   3   2  285.03    6.67
  -1   3   2  291.43    7.08
   1  -3  -2  293.09    7.03
   1  -3  -2  317.49    6.97
  -1   3   1  833.46   17.27
  -1   3   1  818.65   17.44
   1  -3  -1  828.17   17.34
  -1   3   1  873.15   17.23
   1   3  -1  833.41   17.47
  -1  -3   1  904.00   17.35
  -1  -3   1  903.14   17.11
   1  -3  -1  885.23   17.52
   1   3  -1  837.22   17.23
   1   3   1  608.04   12.58
   1   3   1  647.95   12.86
  -1  -3  -1  613.95   12.60
  -1   3  -1  567.30   12.85
   1  -3   1  616.45   12.72
  -1  -3  -1  619.00   12.56
   1  -3   1  610.91   13.11
  -1  -3  -1  637.85   12.79
   1  -3   1  618.37   12.60
   1   3   1  648.76   12.43
  -1   3  -1  585.62   12.78
   1  -3   2  124.22    3.56
  -1  -3  -2  128.51    3.61
  -1   3  -2  127.55    3.79
  -1  -3  -2  134.86    3.77
   1  -3   2  130.62    3.55
   1   3   2  124.51    3.37
   1   3   2  119.56    3.44
   1  -3   3    2.09    0.59
   1  -3   3    3.68    0.63
   1   3   3    1.28    0.46
  -1  -3  -3    2.37    0.57
  -1   3  -3    2.18    0.63
   1   3   3    1.84    0.55
   1  -3   3    2.14    0.53
  -1  -3  -3    1.77    0.52
   1   3   4 1579.45   30.90
  -1   3  -4 1628.22   30.91
   1  -3   4 1588.05   30.80
   1  -3   4 1676.75   30.96
  -1  -3  -4 1537.69   31.47
   1   3   4 1573.95   31.02
  -1   3  -5 4755.78   89.87
   1  -3   5 4916.94   90.27
  -1  -3  -5 4662.40   91.02
   1   3   5 4774.98   90.39
   1   3   5 4574.79   90.27
   1   3   6  548.27   12.98
   1  -3   6  553.01   12.37
   1  -3   6  558.15   12.82
  -1  -3  -6  551.57   13.63
   1   3   6  537.84   12.99
  -1   3  -6  561.89   12.23
   1   3   7   58.22    3.12
  -1  -3  -7   70.28    3.66
   1  -3   7   64.66    3.11
  -1   3  -7   63.40    2.62
   1  -3   7   66.39    2.83
   1   3   7   63.55    3.27
  -1  -3  -8    5.10    1.13
   1   3   8    6.44    1.35
   1  -3   8    2.96    0.74
   1  -3   8    4.39    1.11
  -1  -3  -8    5.45    1.36
   1   3   8    6.24    1.33
  -1   3  -8    4.97    0.80
  -1  -3  -9  247.74    8.72
  -1  -3  -9  256.46    7.84
   1  -3   9  247.61    7.11
   1   3   9  234.12    7.96
  -1   3  -9  250.98    6.66
   1   3   9  241.31    8.03
   1   3  10   44.28    3.21
  -1   3 -10   46.28    2.32
  -1  -3 -10   47.33    2.98
   1  -3  10   43.74    3.02
   1   3  10   49.20    3.38
   1  -3  10   44.87    2.62
  -1  -3 -11  511.69   13.26
   1   3  11  500.98   14.16
   1   3  11  518.44   14.36
  -1   3 -11  504.65   11.83
   1  -3  11  527.32   12.67
   1   3  12  598.25   16.59
  -1  -3 -12  579.98   15.03
  -1   3 -12  612.43   13.68
   1   3  12  609.68   16.49
   1  -3  12  612.59   14.53
   1   3  13  334.52   11.36
  -1   3 -13  323.28    8.44
   1  -3  13  327.65    9.20
   1   3  13  334.80   11.33
  -1  -3 -13  331.05    9.77
  -1  -3 -14  203.74    7.18
   1  -3  14  221.89    6.93
   1   3  14  218.69    9.05
   1   3  14  213.39    8.99
   1  -3  14  213.30    9.91
   1   3  15  463.00   14.93
   1   3  15  427.22   14.36
   1  -3  15  456.58   16.06
   1   3  16  433.24   14.83
   1   3  16  466.83   15.10
  -1   5  15   36.75    3.56
  -1   5  15   41.95    3.90
   1  -5 -15   33.48    3.47
  -1   5  14  238.98    9.21
  -1   5  14  245.43    9.47
   1  -5 -14  220.03    8.91
  -1   5  13   31.73    3.06
  -1   5  13   29.95    3.05
   1  -5 -13   25.29    2.76
   1  -5 -13   25.22    2.77
  -1  -5  13   27.64    2.36
  -1   5  12   11.36    1.95
   1  -5 -12    8.02    1.69
  -1   5  12   11.61    1.99
   1  -5 -12    9.26    1.77
  -1  -5  12   11.91    1.61
   1  -5 -11  153.67    6.60
   1  -5 -11  160.44    6.68
  -1   5  11  164.44    6.63
  -1  -5  11  168.87    6.02
  -1   5  11  161.90    6.66
  -1  -5  10   37.71    2.58
   1  -5 -10   40.26    3.01
  -1   5  10   39.26    2.98
  -1   5  10   40.81    3.02
  -1  -5  10   40.04    2.89
   1  -5  -9   25.71    2.34
  -1   5   9   22.64    2.24
   1  -5  -9   25.61    2.79
  -1  -5   9   25.95    2.24
  -1   5   9   23.61    2.23
  -1  -5   9   25.38    2.05
  -1   5   8  104.27    4.45
   1  -5  -8   95.28    4.38
  -1  -5   8   99.01    4.04
  -1  -5   8   97.22    4.18
  -1   5   8  101.55    4.40
   1  -5  -8   98.07    5.16
  -1   5   7   12.73    1.54
   1  -5  -7    7.59    1.54
  -1  -5   7    8.57    1.28
  -1  -5   7    9.23    1.30
   1  -5  -7    8.94    1.39
  -1   5   7    9.36    1.34
  -1  -5   7    8.90    1.28
  -1  -5   6  137.24    4.69
  -1   5   6  143.51    4.88
   1  -5  -6  133.75    5.67
  -1  -5   6  141.05    4.85
   1  -5  -6  144.85    5.13
  -1  -5   6  151.02    4.96
   1  -5  -6  136.59    5.55
  -1   5   6  137.27    4.84
   1  -5  -5  201.51    6.08
   1  -5  -5  187.17    6.67
  -1  -5   5  217.24    5.86
   1  -5  -5  189.27    6.53
  -1   5   5  183.50    5.67
  -1  -5   5  211.22    6.01
  -1   5   5  190.12    5.79
  -1  -5   5  198.45    5.99
  -1  -5   4  613.21   13.74
  -1  -5   4  622.64   14.14
  -1  -5   4  602.13   13.46
  -1   5   4  616.93   13.73
   1  -5  -4  614.43   14.79
   1  -5  -4  626.14   14.62
   1  -5  -4  630.67   13.96
  -1   5   4  618.80   13.63
   1   5  -4  619.25   14.39
  -1  -5   3  110.25    3.72
  -1  -5   3  104.38    4.04
  -1   5   3  110.88    3.73
   1   5  -3  101.30    3.94
   1  -5  -3  111.15    3.87
  -1  -5   3  111.37    3.56
   1  -5  -3  118.11    4.37
   1  -5  -3  109.71    4.19
  -1   5   2   91.48    3.17
   1  -5  -2   92.69    3.65
   1  -5  -2   97.21    3.61
  -1  -5   2   88.26    3.64
  -1  -5   2   91.95    3.06
  -1   5   2   93.11    3.66
   1   5  -2   88.65    3.43
  -1  -5   2   84.62    3.18
  -1   5   2   88.90    3.25
   1   5  -2   90.33    3.60
  -1  -5   1   52.06    2.16
   1  -5  -1   45.19    2.36
   1   5  -1   53.93    2.27
   1  -5  -1   54.50    2.44
  -1  -5   1   51.44    2.31
  -1   5   1   49.91    2.46
   1   5  -1   49.51    2.52
   1   5  -1   45.81    2.26
  -1   5   1   50.83    2.28
  -1   5   1   51.73    2.39
   1   5   0   78.27    2.97
   1  -5   0   82.29    3.10
   1  -5   0   76.45    2.88
   1   5   0   77.28    3.11
   1   5   0   72.09    2.80
  -1   5   0   79.53    3.00
   1  -5   0   75.92    3.34
  -1  -5   0   73.40    2.76
  -1   5   0   74.98    2.98
  -1   5   0   76.60    3.12
   1  -5   1 2992.99   58.07
   1   5   1 3045.98   57.75
   1  -5   1 3261.25   59.14
   1   5   1 3068.01   58.17
   1   5   1 2960.17   58.31
  -1   5  -1 2816.32   58.52
  -1  -5  -1 2935.57   57.98
  -1   5  -1 2921.55   58.27
   1  -5   1 3201.00   58.02
  -1  -5  -1 2981.37   58.32
   1   5   2   75.79    2.89
   1  -5   2   80.07    2.89
  -1  -5  -2   77.15    2.93
   1   5   2   76.71    2.78
   1  -5   2   79.42    3.04
  -1   5  -2   77.13    3.32
  -1  -5  -2   76.57    3.12
   1  -5   2   75.87    3.34
  -1   5  -2   71.17    3.21
  -1  -5  -2   84.84    3.37
   1  -5   3   40.36    2.04
  -1  -5  -3   41.65    2.14
   1  -5   3   40.06    2.36
  -1  -5  -3   40.43    2.30
  -1  -5  -3   37.09    2.32
   1  -5   3   38.98    2.05
   1   5   3   42.62    2.08
   1   5   3   40.75    1.94
  -1   5  -3   40.95    2.44
  -1  -5  -4 1116.63   23.33
   1  -5   4 1083.00   22.99
   1  -5   4 1048.89   22.32
   1   5   4 1075.67   22.18
   1  -5   4 1106.44   22.56
  -1  -5  -4 1102.78   22.69
  -1   5  -4 1045.04   23.30
  -1  -5  -4 1101.51   23.58
   1   5   4 1072.55   22.33
  -1  -5  -5  107.12    4.08
   1  -5   5  114.77    4.05
  -1  -5  -5  102.15    4.35
   1  -5   5   98.57    3.98
   1   5   5  106.12    3.81
  -1  -5  -5  102.54    4.54
   1   5   5  112.79    3.97
   1  -5   5   99.52    3.77
  -1  -5  -6  305.17    8.59
   1  -5   6  310.15    8.20
   1  -5   6  310.61    8.48
   1   5   6  303.30    8.23
   1  -5   6  314.39    8.38
   1   5   6  293.46    8.15
  -1  -5  -6  314.85    9.43
   1  -5   7    8.70    1.23
   1  -5   7    8.49    1.24
   1   5   7    6.92    1.22
  -1  -5  -7    6.13    1.08
  -1  -5  -7    8.18    1.49
   1  -5   7    8.78    1.24
   1   5   7    8.49    1.30
   1  -5   8  430.11   11.28
  -1  -5  -8  424.90   12.74
   1  -5   8  428.08   11.30
  -1  -5  -8  468.76   12.01
   1   5   8  433.35   11.54
   1   5   8  432.50   11.40
   1   5   9   25.60    2.23
   1   5   9   23.09    2.21
   1  -5   9   23.05    2.12
  -1  -5  -9   25.99    2.37
   1  -5   9   24.63    2.19
   1   5  10 1149.74   25.86
   1  -5  10 1117.80   25.32
  -1  -5 -10 1110.98   26.58
  -1  -5 -10 1199.48   26.40
   1   5  10 1178.87   26.11
   1   5  11  426.37   12.16
  -1  -5 -11  410.75   12.57
   1  -5  11  419.02   11.65
  -1  -5 -11  408.81   12.34
   1   5  11  435.87   12.46
  -1  -5 -12  331.18   11.21
  -1  -5 -12  369.31   11.55
   1  -5  12  368.24   10.61
   1   5  12  358.55   11.17
  -1  -5 -13   59.89    4.19
   1  -5  13   61.81    3.72
  -1  -5 -13   57.55    4.20
   1   5  13   64.18    4.32
   1   5  14   96.35    5.46
  -1  -5 -14   96.03    5.62
   1  -5  14   91.29    4.60
  -1  -5 -15   10.49    2.33
   1   5  15    8.72    2.02
  -1   7  14  362.22   11.90
  -1   7  14  364.51   12.09
   1  -7 -14  361.77   12.39
  -1   7  13    0.95    1.57
   1  -7 -13   -0.44    1.30
  -1   7  13    2.00    1.53
  -1  -7  13    1.71    1.11
   1  -7 -12    0.40    1.26
  -1  -7  12    3.83    1.34
  -1   7  12    6.77    1.88
  -1   7  12    4.03    1.67
  -1   7  11   51.77    3.61
   1  -7 -11   48.85    3.67
  -1   7  11   50.74    3.57
  -1  -7  11   49.20    3.49
  -1   7  10 1055.70   23.30
   1  -7 -10  967.44   23.48
  -1   7  10  977.71   23.05
  -1  -7  10 1003.86   23.32
   1  -7  -9  454.79   12.43
  -1   7   9  429.58   11.80
  -1  -7   9  427.40   12.07
  -1   7   9  424.12   11.77
  -1   7   8    5.77    1.46
  -1   7   8    7.30    1.45
   1  -7  -8    4.21    1.47
  -1  -7   8    3.33    1.21
  -1  -7   8    4.10    1.28
  -1   7   7    3.79    1.07
   1  -7  -7    5.33    1.40
  -1  -7   7    4.71    1.18
  -1  -7   7    5.56    1.15
  -1   7   7    6.63    1.31
   1  -7  -7    4.82    1.43
   1  -7  -6  226.31    8.61
  -1  -7   6  229.79    6.87
   1  -7  -6  234.34    7.37
  -1  -7   6  227.68    7.15
   1  -7  -6  225.62    8.32
  -1  -7   6  235.28    7.65
  -1   7   6  236.39    6.96
  -1   7   5   15.51    1.54
  -1  -7   5   15.66    1.86
   1   7  -5   12.79    1.70
  -1  -7   5   14.68    1.55
   1  -7  -5   15.35    1.69
   1  -7  -5   12.83    1.81
  -1  -7   5   16.07    1.51
   1  -7  -5   13.46    1.88
  -1   7   5   16.31    1.64
   1  -7  -4  675.95   17.37
  -1  -7   4  715.57   16.85
  -1  -7   4  693.41   15.89
  -1  -7   4  703.59   15.51
   1   7  -4  710.27   17.01
   1  -7  -4  722.44   17.29
  -1   7   4  701.62   15.68
  -1   7   4  676.76   15.87
   1  -7  -3  160.86    6.07
  -1  -7   3  154.34    5.85
  -1   7   3  156.47    5.33
   1   7  -3  162.74    5.18
   1   7  -3  151.35    5.71
  -1  -7   3  160.58    5.28
   1  -7  -3  148.02    5.73
  -1   7   3  158.18    5.11
  -1  -7   2 1459.73   29.29
  -1  -7   2 1405.22   29.60
  -1   7   2 1455.89   29.97
  -1  -7   2 1485.99   30.98
  -1   7   2 1392.21   29.44
   1  -7  -2 1486.14   30.53
   1   7  -2 1395.56   30.18
   1   7  -2 1496.54   30.81
   1   7  -2 1443.21   29.58
  -1   7   2 1366.14   30.53
   1  -7  -2 1511.61   30.84
  -1   7   1   19.23    1.84
   1   7  -1   17.35    1.75
   1  -7  -1   14.78    1.87
   1   7  -1   14.86    1.54
   1  -7  -1   21.34    1.91
  -1   7   1   19.13    1.65
  -1  -7   1   16.68    1.43
   1   7  -1   18.01    1.63
   1  -7  -1   25.58    2.17
  -1  -7   1   17.30    1.96
  -1  -7   1   22.52    1.80
  -1   7   1   20.20    1.83
  -1   7   0  685.44   16.36
   1  -7   0  714.30   16.19
   1  -7   0  694.28   15.83
  -1  -7   0  738.48   16.22
   1   7   0  698.04   16.16
  -1  -7   0  703.31   15.69
   1   7   0  708.35   16.36
  -1   7   0  692.85   16.04
   1   7   0  706.65   15.89
  -1   7   0  677.61   16.22
   1  -7   0  689.88   16.90
   1   7   1  253.32    7.01
  -1   7  -1  243.98    7.41
   1  -7   1  242.83    7.92
  -1   7  -1  257.71    7.87
   1   7   1  246.65    7.38
  -1  -7  -1  250.66    7.29
  -1  -7  -1  256.91    7.58
   1   7   1  238.48    7.42
   1  -7   1  253.31    7.28
  -1   7  -1  252.45    7.34
   1   7   2 1290.11   26.81
   1   7   2 1259.60   27.28
  -1  -7  -2 1299.80   27.75
  -1   7  -2 1349.49   28.37
   1  -7   2 1315.46   26.95
  -1   7  -2 1287.67   27.98
   1  -7   2 1275.36   28.22
  -1   7  -2 1388.72   27.50
   1  -7   2 1238.51   27.13
  -1  -7  -2 1404.79   28.39
   1   7   3   49.32    2.45
  -1   7  -3   44.68    2.98
   1  -7   3   43.57    2.90
   1  -7   3   44.12    2.40
  -1  -7  -3   46.16    3.07
   1  -7   3   44.99    2.54
   1   7   3   44.56    2.57
   1   7   4  807.78   17.37
   1  -7   4  804.74   18.74
  -1   7  -4  792.00   19.05
  -1  -7  -4  802.72   18.85
   1   7   4  782.90   17.68
  -1  -7  -4  820.03   19.43
   1  -7   4  759.84   17.41
   1  -7   4  814.90   17.91
  -1  -7  -4  794.15   17.89
  -1   7  -5    0.35    0.96
   1  -7   5    3.77    1.00
   1  -7   5    2.28    0.90
  -1  -7  -5    1.03    0.97
   1   7   5    2.65    1.02
   1  -7   5    1.85    1.01
   1   7   5    2.54    0.95
  -1  -7  -5    2.35    1.04
  -1  -7  -6   23.38    2.58
  -1  -7  -6   23.22    2.37
   1   7   6   19.89    1.75
   1  -7   6   24.10    1.95
   1  -7   6   18.46    2.02
  -1  -7  -6   20.07    1.94
   1  -7   7    6.58    1.36
   1   7   7    7.23    1.30
  -1  -7  -7   10.70    1.64
   1  -7   7    5.47    1.17
   1   7   7    6.65    1.30
   1   7   8 2317.41   46.10
  -1  -7  -8 2272.50   46.73
   1  -7   8 2233.33   46.92
   1   7   8 2258.91   46.13
   1   7   9    4.77    1.44
  -1  -7  -9    2.27    1.38
   1  -7   9    2.27    1.30
   1   7   9    3.81    1.39
  -1  -7 -10  142.55    6.24
   1  -7  10  136.65    6.10
   1   7  10  147.19    5.97
   1   7  10  137.69    5.77
   1   7  11   16.56    2.25
   1   7  11   18.85    2.38
  -1  -7 -11   13.49    2.24
   1  -7  11   14.74    2.14
  -1  -7 -12  212.95    8.48
   1  -7  12  223.68    8.54
   1   7  12  227.06    8.29
   1   7  12  220.00    8.23
   1  -7  13    0.35    1.14
   1   7  13    3.92    1.79
   1   7  13    2.69    1.55
  -1  -7 -13    0.55    1.45
   1   7  14   31.61    3.22
   1   7  14   26.78    3.16
   1  -9 -11   39.50    3.52
  -1   9  11   37.84    3.21
  -1   9  11   37.59    3.27
  -1  -9  11   36.95    3.45
   1  -9 -11   31.90    3.23
  -1   9  10  271.23    9.21
  -1   9  10  266.70    8.92
   1  -9 -10  271.10    9.58
  -1  -9  10  273.03    9.92
  -1  -9   9   12.55    1.92
   1  -9  -9   16.08    2.27
  -1   9   9   15.21    2.10
  -1   9   8    1.81    1.25
  -1   9   8    3.76    1.29
  -1  -9   8    2.10    1.26
  -1  -9   7  216.02    8.08
  -1   9   7  209.91    7.15
  -1   9   7  217.90    7.47
  -1   9   6  720.90   17.64
   1  -9  -6  741.59   19.06
  -1  -9   6  734.95   18.72
  -1   9   6  735.25   17.31
   1   9  -5  167.72    5.96
  -1   9   5  178.27    6.12
  -1   9   5  164.88    6.31
  -1  -9   5  176.02    7.02
   1   9  -5  161.48    7.16
   1  -9  -5  172.40    7.21
  -1  -9   4  113.66    4.66
   1   9  -4  123.04    5.89
   1   9  -4  125.53    4.94
  -1   9   4  138.39    5.16
   1  -9  -4  118.64    5.85
  -1  -9   4  130.30    5.88
  -1   9   4  137.58    5.51
   1   9  -3   27.68    2.63
  -1   9   3   25.39    2.46
   1  -9  -3   26.36    2.66
  -1   9   3   31.74    2.43
  -1  -9   3   27.06    2.68
   1  -9  -3   33.39    3.06
   1   9  -3   28.15    2.27
  -1  -9   3   27.60    2.12
   1  -9  -2  390.85   11.97
   1  -9  -2  376.77   11.33
  -1  -9   2  375.54   10.28
  -1   9   2  408.05   10.83
   1   9  -2  410.41   11.51
   1   9  -2  393.67   10.87
  -1   9   2  400.18   11.23
  -1  -9   2  407.47   11.95
   1  -9  -1    4.02    1.19
  -1  -9   1    3.16    0.95
   1   9  -1    0.03    1.30
  -1   9   1    3.58    1.21
  -1  -9   1    1.99    1.19
  -1   9   1    2.58    1.14
   1   9  -1    4.28    1.28
   1  -9  -1    3.59    1.46
   1   9  -1    1.15    1.01
  -1   9   1    2.10    1.10
   1   9   0  136.43    5.36
   1  -9   0  124.08    5.21
   1   9   0  127.70    5.46
  -1  -9   0  126.06    5.95
  -1   9   0  134.35    5.48
  -1  -9   0  129.65    5.16
  -1   9   0  139.24    5.87
   1  -9   0  137.13    6.14
  -1   9   0  125.94    5.52
   1   9   0  141.36    5.84
   1   9   1  274.56    8.13
   1   9   1  259.29    8.47
  -1   9  -1  269.53    8.58
  -1  -9  -1  240.28    8.15
  -1   9  -1  251.05    8.75
  -1   9  -1  257.84    8.34
   1  -9   1  263.54    9.06
  -1  -9  -1  261.21    9.15
   1  -9   1  253.13    7.84
  -1   9  -2  668.17   16.66
   1  -9   2  689.62   17.72
   1  -9   2  644.63   16.01
  -1   9  -2  716.77   17.57
  -1  -9  -2  679.69   17.92
   1   9   2  722.93   16.39
  -1  -9  -2  680.61   17.22
   1   9   2  733.13   17.11
  -1   9  -3    1.29    1.02
  -1  -9  -3   -0.55    1.10
   1   9   3    2.91    1.38
   1   9   3    0.54    1.01
   1  -9   3    4.47    1.58
  -1   9  -3    0.03    1.11
  -1   9  -4  829.78   19.35
  -1   9  -4  826.05   20.96
   1   9   4  853.45   19.04
   1  -9   4  858.46   20.77
   1   9   4  873.85   19.73
   1   9   5  546.39   14.22
  -1   9  -5  535.82   15.83
   1  -9   5  587.24   15.58
   1   9   5  569.76   13.78
   1  -9   6  304.06   10.17
   1   9   6  303.37    8.80
   1   9   6  303.62    9.24
   1  -9   7   15.25    2.27
   1   9   7   17.80    1.94
   1   9   7   15.08    1.97
   1   9   8  672.37   16.87
  -1  -9  -8  685.45   17.44
   1  -9   8  676.64   18.16
   1   9   8  697.11   16.68
   1   9   9    8.74    1.70
  -1  -9  -9    9.20    1.86
   1  -9   9    6.54    1.81
  -1  -9 -10    3.72    1.57
   1   9  10    0.24    1.14
   1   9  10    0.33    1.20
   1  -9  10    3.79    1.63
   1   9  11  244.89    8.66
  -1  -9 -11  242.71    9.09
   1  -9  11  223.58    9.27
   1   9  11  226.78    8.24
  -1  11   6   76.31    4.63
  -1 -11   6   75.51    5.03
   1 -11  -6   84.06    5.45
  -1  11   6   78.49    4.34
  -1  11   5   65.00    4.29
  -1  11   5   71.09    4.18
   1 -11  -5   67.10    4.87
  -1 -11   5   64.47    4.64
  -1 -11   4    6.06    2.00
   1  11  -4    2.18    1.48
   1 -11  -4    2.30    1.48
  -1  11   4    3.88    1.61
  -1  11   4    3.64    1.42
  -1 -11   3   87.66    5.32
  -1  11   3   84.04    4.57
   1  11  -3   83.54    5.20
   1 -11  -3   86.95    5.43
  -1  11   3   88.52    5.05
  -1 -11   2   27.30    3.03
   1  11  -2   25.46    2.84
  -1  11   2   24.16    2.78
  -1  11   2   25.11    2.54
   1 -11  -2   22.87    2.91
  -1 -11   1   51.67    4.07
  -1  11   1   49.69    3.52
  -1  11   1   53.65    4.01
   1  11  -1   50.62    3.79
   1 -11  -1   47.18    4.05
   1  11   0   35.02    3.07
  -1  11   0   29.10    3.03
   1  11   0   29.11    3.01
  -1 -11   0   26.38    3.05
  -1  11   0   26.95    2.80
   1 -11   0   32.06    3.35
  -1 -11  -1  365.23   12.57
   1  11   1  377.48   11.40
   1  11   1  382.69   12.15
   1 -11   1  394.18   12.76
  -1  11  -1  397.95   12.20
   1  11   2   75.46    4.72
   1  11   2   78.36    4.34
  -1 -11  -2   79.70    5.35
   1 -11   2   88.23    5.36
  -1  11  -2   89.81    5.26
   1  11   3   34.40    3.18
  -1  11  -3   43.08    3.78
  -1 -11  -3   37.80    3.70
   1  11   3   41.16    3.11
   1 -11   3   41.23    3.74
  -1  11  -4   -0.18    1.64
   1 -11   4    3.09    1.64
   1  11   4    1.86    1.46
  -1 -11  -4    2.88    1.55
   1  11   4    1.78    1.09
   1 -11   5  456.02   14.41
   1  11   5  454.91   12.67
   1  11   5  456.66   13.42
  -1 -11  -5  446.79   14.54
  -1  11  -5  477.09   15.18
   1 -11   6  274.55   10.38
   1  11   6  266.68    8.77
  -1 -11  -6  275.23   10.66
   1  11   6  261.96    9.33
  -2   0  17   -1.01    2.20
  -2   0  16  548.96   17.83
  -2   0  15   -0.87    2.07
  -2   0  14   91.50    5.79
  -2   0  13    0.41    1.41
   2   0 -13    0.12    0.30
  -2   0  12 5971.51  116.89
   2   0 -12 5858.84  111.05
   2   0 -11    0.61    0.39
  -2   0  11    5.09    1.75
  -2   0  10 2207.89   46.71
   2   0 -10 2324.12   42.54
  -2   0   9    1.40    1.03
   2   0  -9    0.79    0.32
  -2   0   8 3202.21   63.56
  -2   0   7    0.37    0.70
   2   0  -7    0.06    0.24
   2   0  -6  268.97    5.63
  -2   0   6  253.82    7.47
   2   0  -5    0.29    0.16
  -2   0   5   -0.15    0.47
  -2   0   4   52.55    2.30
  -2   0   3    0.59    0.42
  -2   0  -3    0.14    0.30
   2   0   3    0.05    0.31
  -2   0  -4 1187.20   22.82
   2   0   4 1115.17   22.80
   2   0   5    0.44    0.53
  -2   0  -5    0.64    0.43
   2   0   5    0.06    0.39
  -2   0  -6 1827.36   34.28
   2   0   6 1734.57   35.51
   2   0   6 1744.89   34.35
   2   0   7    0.43    0.61
   2   0   7    0.53    0.75
  -2   0  -7    0.36    0.46
   2   0   8  605.14   15.44
  -2   0  -8  624.63   13.73
   2   0   8  641.01   14.06
   2   0   9    0.08    0.58
   2   0   9    0.11    1.03
  -2   0  -9   -0.35    0.57
  -2   0 -10 2743.54   53.56
   2   0  10 2760.00   56.62
   2   0  11    0.20    1.22
  -2   0 -11    1.53    0.69
   2   0  12  434.54   13.58
  -2   0 -12  439.49   10.55
   2   0  13    2.53    1.79
  -2   0 -13    0.58    0.60
   2   0  14   12.28    2.44
  -2   0 -14    8.80    1.12
   2   0  15   -0.33    1.65
   2   0  16  529.52   17.52
   2   0  17   -0.20    1.94
  -2   2  17  106.51    6.89
  -2   2  17  104.09    6.90
  -2  -2  17  115.59    7.67
  -2   2  16  398.63   14.06
  -2   2  16  397.10   14.11
  -2  -2  16  405.62   14.98
  -2   2  15    1.90    1.65
  -2  -2  15    0.88    1.61
  -2   2  15    2.01    1.75
   2  -2 -14   56.22    2.53
  -2  -2  14   64.74    5.08
  -2   2  14   57.40    4.48
  -2   2  14   49.26    4.20
   2  -2 -13   18.31    1.50
  -2   2  13   17.37    2.60
  -2  -2  13   15.65    2.78
  -2   2  13   18.23    2.57
  -2   2  12 1002.92   25.02
  -2   2  12 1006.64   25.06
   2  -2 -12 1028.94   21.99
  -2  -2  12 1057.10   26.18
  -2  -2  12 1084.17   21.25
  -2   2  11    0.01    1.14
  -2   2  11   -0.02    1.03
  -2  -2  11    0.04    0.51
   2  -2 -11    0.66    0.59
  -2  -2  10  440.84    9.84
  -2   2  10  429.37   12.24
  -2   2  10  426.02   12.27
   2  -2 -10  437.22   10.52
   2  -2  -9  674.61   17.09
  -2  -2   9  665.42   14.01
  -2   2   9  640.26   16.23
  -2   2   9  625.71   16.27
   2  -2  -9  689.38   14.77
  -2   2   8  354.48    9.83
   2  -2  -8  370.80   10.49
  -2   2   8  369.07    9.99
   2  -2  -8  375.13    8.73
  -2   2   7  125.15    4.80
  -2  -2   7  125.11    3.52
   2  -2  -7  123.17    5.04
  -2   2   7  123.28    4.73
  -2  -2   6  224.58    5.39
  -2   2   6  230.97    6.77
  -2   2   6  233.14    6.73
   2  -2  -6  241.34    7.16
   2  -2  -5 1149.09   23.78
  -2   2   5 1099.97   23.22
  -2   2   5 1127.11   23.33
  -2  -2   5 1144.69   21.97
   2  -2  -4 1718.14   34.81
  -2  -2   4 1731.72   34.01
  -2   2   4 1636.61   34.85
  -2   2   4 1687.25   34.91
   2  -2  -4 1810.53   35.35
   2  -2  -4 1776.34   35.35
  -2   2   3 2610.54   46.96
   2  -2  -3 2494.04   47.12
  -2  -2   3 2498.93   46.56
  -2  -2   2   11.32    0.68
  -2   2   2   10.98    0.79
   2  -2  -2   13.32    0.86
  -2   2   2   12.25    0.88
   2  -2  -2   11.93    0.88
   2  -2  -2   13.80    0.94
  -2   2   2    9.18    0.73
   2   2  -1 1147.48   23.97
  -2  -2   1 1378.82   24.02
   2  -2  -1 1256.34   24.19
   2   2  -1 1213.70   23.80
   2  -2  -1 1214.42   24.15
   2  -2  -1 1092.26   24.19
   2  -2   0  268.45    5.80
  -2   2   0  275.15    5.85
  -2  -2   0  261.28    5.61
   2   2   0  268.88    5.41
  -2  -2   0  273.05    5.45
   2  -2   0  252.80    5.95
  -2  -2   0  264.62    5.40
   2   2   0  266.95    5.65
  -2   2   0  241.54    5.74
   2   2   0  280.19    5.57
  -2   2  -1 2382.98   45.76
  -2   2  -1 2223.69   45.55
  -2  -2  -2  351.15    7.77
  -2  -2  -2  357.71    7.77
  -2   2  -2  369.31    7.96
   2  -2   2  351.56    7.79
   2   2   2  361.04    7.62
   2  -2   2  356.43    7.65
   2  -2   2  369.15    7.73
  -2   2  -2  361.30    7.80
   2   2   3  207.06    5.21
  -2  -2  -3  208.78    5.46
  -2   2  -3  217.51    5.14
  -2   2  -3  197.90    5.39
   2   2   3  206.86    5.26
   2  -2   3  199.22    5.16
   2  -2   3  217.86    5.22
   2   2   4   78.98    3.01
   2  -2   4   86.78    3.00
   2   2   4   84.14    3.04
  -2   2  -4   85.38    2.73
  -2  -2  -4   85.18    3.23
   2  -2   4   85.63    2.85
   2  -2   5    4.73    0.81
   2   2   5    7.44    1.01
   2  -2   5    5.08    0.79
  -2   2  -5    7.11    0.79
  -2  -2  -5    7.46    0.95
  -2  -2  -5    5.46    1.01
   2   2   5    7.61    1.00
  -2   2  -6 4089.96   75.59
  -2  -2  -6 3859.34   77.24
   2  -2   6 3969.48   76.09
   2  -2   6 3961.48   76.63
  -2  -2  -6 3837.42   76.56
   2   2   6 4137.91   77.06
   2   2   7   19.03    1.81
  -2  -2  -7   19.28    1.63
  -2   2  -7   19.37    1.26
   2  -2   7   18.60    1.48
  -2  -2  -7   18.23    1.87
   2   2   8   23.79    2.13
   2  -2   8   23.16    1.74
  -2  -2  -8   25.10    1.94
  -2   2  -8   26.28    1.56
  -2  -2  -9  242.99    7.26
   2   2   9  245.38    8.06
   2  -2   9  241.11    6.92
  -2   2  -9  232.59    6.23
  -2   2 -10 1266.67   25.78
   2   2  10 1266.35   28.63
  -2  -2 -10 1297.01   27.20
   2  -2  10 1267.89   26.74
  -2  -2 -11  122.43    4.82
   2   2  11  112.95    5.61
   2  -2  11  115.90    4.52
  -2   2 -11  119.96    4.01
  -2   2 -12   93.43    3.46
   2  -2  12   96.06    4.10
   2   2  12   94.85    5.31
  -2  -2 -12   91.62    4.21
   2  -2  12   99.63    5.87
  -2   2 -13  105.56    3.75
   2  -2  13  120.30    6.68
   2   2  13  106.99    5.96
   2  -2  13  107.75    4.47
  -2  -2 -13  104.29    4.53
   2   2  13  100.48    5.73
   2   2  14  431.39   13.86
   2  -2  14  415.55   10.97
   2  -2  14  427.15   14.66
  -2  -2 -14  411.49   11.06
   2   2  14  421.05   13.89
   2  -2  15    8.47    2.48
   2   2  15    8.65    2.19
   2   2  15   11.11    2.50
   2   2  16  307.52   12.07
   2   2  16  323.10   12.46
   2  -2  16  294.12   12.66
   2   2  17   49.59    4.85
   2   2  17   44.12    4.66
   2  -4 -16  153.24    7.54
  -2  -4  16  150.60    8.92
  -2   4  16  164.21    8.01
  -2   4  16  154.50    7.89
  -2  -4  15   92.31    6.58
  -2   4  15   94.26    5.79
   2  -4 -15   83.29    5.28
  -2   4  15   82.25    5.52
   2  -4 -14  358.00   11.76
  -2   4  14  352.75   12.04
  -2   4  14  355.81   12.09
   2  -4 -13  719.65   18.24
  -2  -4  13  775.07   17.19
  -2   4  13  788.41   20.19
  -2   4  13  790.26   20.22
   2  -4 -13  786.22   19.84
  -2   4  12   45.78    3.64
   2  -4 -12   43.89    3.43
  -2   4  12   43.48    3.37
   2  -4 -12   53.55    3.34
  -2  -4  12   47.91    2.68
   2  -4 -11    2.16    1.06
  -2  -4  11    1.97    0.79
  -2   4  11    2.47    1.22
  -2   4  11    0.48    1.30
   2  -4 -11    0.47    1.20
  -2   4  10   59.05    3.65
  -2   4  10   53.95    3.67
   2  -4 -10   60.47    4.20
  -2  -4  10   56.83    3.41
   2  -4 -10   56.50    3.36
  -2  -4  10   58.55    2.89
  -2  -4   9 1220.13   25.23
  -2   4   9 1210.96   26.74
   2  -4  -9 1153.65   27.84
   2  -4  -9 1215.75   26.73
  -2  -4   9 1261.80   26.54
  -2  -4   8  620.93   14.14
  -2   4   8  652.76   15.52
   2  -4  -8  665.44   15.45
  -2  -4   8  649.66   15.06
   2  -4  -8  641.89   16.49
  -2   4   7   96.01    4.03
  -2   4   7   89.91    4.00
   2  -4  -7  101.92    4.22
  -2  -4   7   95.62    3.49
  -2  -4   7   94.65    3.88
   2  -4  -6  290.74    8.56
  -2  -4   6  282.81    7.33
  -2  -4   6  278.16    7.51
  -2   4   6  270.16    7.69
   2  -4  -6  291.77    8.71
   2  -4  -6  278.34    7.86
  -2  -4   5 2333.85   45.43
   2  -4  -5 2350.28   46.79
   2  -4  -5 2374.48   45.97
   2  -4  -5 2309.31   46.65
  -2   4   5 2326.20   45.80
  -2   4   5 2444.61   45.86
  -2  -4   5 2254.42   45.40
  -2  -4   4   10.49    1.10
  -2   4   4   10.52    1.11
   2  -4  -4   10.24    1.15
  -2   4   4   10.71    1.10
   2  -4  -4   10.06    1.21
   2  -4  -4   12.23    1.34
  -2  -4   4   12.20    1.12
  -2  -4   4   10.90    1.02
  -2  -4   3  644.35   13.61
   2  -4  -3  665.24   14.62
   2  -4  -3  648.98   14.08
  -2   4   3  650.47   13.90
   2   4  -3  653.85   14.15
  -2  -4   3  661.34   14.28
  -2   4   3  627.14   14.50
  -2   4   3  654.81   13.87
   2  -4  -3  667.62   14.59
  -2  -4   3  637.84   13.81
   2  -4  -2   76.32    2.96
  -2   4   2   71.10    2.91
   2  -4  -2   73.55    2.88
   2   4  -2   65.50    2.59
  -2  -4   2   70.77    2.56
  -2   4   2   75.18    2.68
  -2  -4   2   72.04    2.43
  -2   4   2   69.69    2.54
   2   4  -1   64.87    2.65
   2  -4  -1   64.93    2.67
  -2  -4   1   74.44    2.56
  -2   4   1   73.99    2.58
   2  -4  -1   65.76    2.84
   2  -4  -1   63.94    2.54
   2   4  -1   65.22    2.41
  -2   4   1   73.00    2.64
  -2   4   1   66.80    2.69
   2   4  -1   71.34    2.38
   2   4   0  882.04   18.03
   2   4   0  879.29   18.39
  -2   4   0  908.58   18.65
   2  -4   0  909.55   19.04
   2   4   0  876.59   18.19
  -2   4   0  897.20   18.54
   2  -4   0  907.45   18.38
  -2   4   0  889.21   18.47
  -2  -4   0  881.88   17.97
   2  -4   0  955.04   18.56
  -2  -4   0  880.52   18.28
  -2   4  -1  756.99   16.71
   2  -4   1  812.43   16.46
   2   4   1  762.87   16.43
  -2  -4  -1  795.27   16.22
  -2  -4  -1  795.27   16.10
   2   4   1  774.48   16.27
  -2   4  -1  775.31   16.63
   2  -4   1  795.34   16.96
  -2  -4  -1  802.45   16.51
   2   4   1  810.27   15.99
   2  -4   1  790.99   16.30
  -2  -4  -2  533.67   11.30
   2  -4   2  467.21   10.96
   2   4   2  496.17   10.65
   2  -4   2  533.51   11.12
   2   4   2  503.74   10.90
  -2   4  -2  491.67   11.51
   2  -4   2  490.85   11.51
  -2   4  -2  458.38   11.34
  -2  -4  -2  509.90   10.97
  -2  -4  -2  531.29   11.42
   2  -4   3 1057.43   21.67
   2   4   3  973.06   20.93
   2  -4   3 1108.94   21.35
   2  -4   3 1046.89   21.16
  -2  -4  -3 1030.19   21.68
  -2  -4  -3 1020.29   21.27
  -2   4  -3 1011.91   21.76
  -2  -4  -3 1007.54   21.50
   2   4   3 1074.82   20.92
   2  -4   4    4.61    0.87
   2  -4   4    5.14    0.86
   2  -4   4    5.39    0.82
  -2  -4  -4    6.42    1.01
  -2  -4  -4    4.81    0.93
   2   4   4    4.66    0.79
   2   4   4    6.53    0.98
  -2   4  -4    5.89    1.10
  -2  -4  -4    4.43    0.84
   2  -4   5  432.95   10.61
   2   4   5  451.24   10.60
  -2  -4  -5  436.21   10.77
  -2   4  -5  450.24   10.67
  -2  -4  -5  443.46   11.30
   2  -4   5  444.84   10.53
   2   4   5  437.52   10.45
  -2   4  -6   53.82    2.63
   2   4   6   50.54    2.69
   2  -4   6   49.21    2.62
   2   4   6   48.06    2.59
  -2  -4  -6   51.55    3.08
   2  -4   6   51.45    2.65
  -2   4  -7 1161.56   23.86
   2  -4   7 1151.58   24.26
   2   4   7 1131.27   24.37
   2   4   7 1104.77   24.20
   2  -4   7 1124.02   24.03
  -2  -4  -7 1125.49   25.40
   2  -4   8  124.73    4.72
   2  -4   8  128.67    4.93
   2   4   8  124.97    4.97
  -2   4  -8  133.76    4.58
   2   4   8  129.67    5.10
  -2  -4  -8  123.08    5.32
  -2  -4  -8  126.68    5.64
  -2  -4  -9  294.57    9.25
  -2   4  -9  296.71    8.07
  -2  -4  -9  293.50    9.87
   2   4   9  299.98    9.08
   2   4   9  285.24    8.98
   2  -4   9  298.93    8.89
   2  -4   9  295.03    8.59
   2  -4  10   58.23    3.26
  -2  -4 -10   54.16    4.04
  -2  -4 -10   59.64    3.73
  -2   4 -10   56.40    2.92
   2   4  10   54.67    3.46
   2   4  10   59.88    3.71
   2  -4  10   56.54    3.45
  -2   4 -11    2.56    0.79
   2   4  11    4.67    1.51
   2  -4  11    2.59    1.07
  -2  -4 -11    2.43    1.19
   2   4  11    1.49    1.34
   2  -4  12   28.14    2.42
  -2  -4 -12   26.06    2.70
   2   4  12   23.89    2.72
   2   4  12   31.96    3.15
  -2  -4 -13  562.03   15.66
   2  -4  13  587.58   15.13
   2   4  13  609.11   16.77
   2   4  13  629.58   17.08
   2   4  14  301.28   10.80
   2   4  14  291.82   10.65
   2  -4  14  280.74    8.95
   2   4  15    1.69    1.81
   2   4  15    1.07    1.39
   2   4  16    2.06    1.56
   2   4  16    2.38    1.70
   2  -4  16    5.67    2.52
  -2   6  15    8.75    2.12
  -2   6  15   10.68    2.25
   2  -6 -15    9.05    2.21
  -2   6  14   95.77    5.47
   2  -6 -14   93.95    5.59
  -2   6  14   99.37    5.73
  -2   6  13  530.81   15.27
  -2   6  13  537.15   15.43
  -2  -6  13  522.59   14.04
   2  -6 -12    3.99    1.27
  -2  -6  12    6.35    1.36
   2  -6 -12    6.63    1.79
  -2   6  12    7.18    1.87
  -2   6  11    4.11    1.52
   2  -6 -11    3.26    1.33
  -2  -6  11    3.11    1.09
  -2   6  11    4.16    1.46
  -2  -6  10  129.94    5.26
  -2   6  10  136.90    5.74
  -2   6  10  134.25    5.73
   2  -6 -10  130.74    5.76
  -2  -6   9 1042.78   23.05
   2  -6  -9 1023.66   23.68
  -2  -6   9 1052.40   23.18
  -2   6   9 1053.87   23.46
  -2   6   9 1018.15   23.35
  -2  -6   8  150.11    5.60
   2  -6  -8  147.88    5.75
  -2  -6   8  148.30    5.36
  -2   6   8  148.95    5.60
  -2   6   8  141.09    5.52
   2  -6  -8  151.76    6.98
  -2  -6   8  150.02    5.47
   2  -6  -7   73.70    3.73
  -2  -6   7   72.86    3.37
   2  -6  -7   70.89    4.43
  -2  -6   7   72.89    3.54
  -2   6   7   74.01    3.63
  -2  -6   7   75.15    3.59
  -2   6   7   79.75    3.69
   2  -6  -7   67.72    4.20
  -2   6   6  232.78    6.97
   2  -6  -6  246.16    8.30
  -2  -6   6  239.43    7.11
  -2  -6   6  240.86    7.25
   2  -6  -6  234.34    7.27
  -2  -6   6  250.95    6.92
   2  -6  -6  233.97    8.36
  -2   6   6  231.78    7.01
   2  -6  -5  687.79   15.71
  -2  -6   5  678.10   15.07
   2  -6  -5  693.36   17.09
  -2  -6   5  665.14   15.35
  -2   6   5  678.72   15.40
  -2   6   5  678.88   15.31
   2  -6  -5  695.72   16.84
  -2  -6   4   21.99    1.66
   2   6  -4   21.94    1.89
  -2  -6   4   25.74    2.06
   2  -6  -4   21.51    1.98
   2  -6  -4   23.98    2.16
  -2   6   4   20.80    1.62
  -2   6   4   21.33    1.66
  -2  -6   4   21.87    1.56
   2  -6  -4   23.81    1.87
  -2   6   3   13.94    1.30
   2  -6  -3    8.18    1.29
  -2   6   3    8.65    1.18
  -2  -6   3   10.58    1.21
   2  -6  -3   10.78    1.39
  -2   6   3    9.28    1.23
   2   6  -3    8.66    1.26
  -2  -6   3   10.16    1.05
  -2  -6   3    7.66    1.25
  -2  -6   2  966.15   19.52
   2   6  -2  953.72   20.69
   2  -6  -2  996.54   20.93
   2   6  -2  954.23   19.71
   2  -6  -2  957.69   21.07
   2  -6  -2  955.26   20.59
  -2   6   2  895.20   20.01
  -2  -6   2  933.63   19.89
  -2   6   2  933.55   19.81
   2   6  -2  885.45   20.13
  -2   6   2  932.52   20.79
  -2  -6   1 1799.62   35.02
  -2   6   1 1790.47   36.15
   2   6  -1 1768.62   35.33
   2  -6  -1 1784.24   36.59
  -2   6   1 1736.00   35.76
   2   6  -1 1775.11   36.09
  -2   6   1 1781.38   35.52
   2  -6  -1 1775.80   36.07
   2   6  -1 1704.56   35.44
   2  -6  -1 1787.43   35.85
  -2  -6   1 1827.71   35.50
   2   6   0   16.59    1.54
   2   6   0   13.40    1.21
   2  -6   0   12.05    1.23
  -2  -6   0   13.81    1.32
  -2   6   0   13.08    1.44
  -2   6   0   13.44    1.35
  -2  -6   0   13.82    1.21
   2   6   0   15.06    1.29
  -2   6   0   14.11    1.35
   2  -6   0   14.35    1.65
   2  -6   0   15.53    1.45
  -2   6  -1 1795.66   36.52
   2  -6   1 1799.81   35.57
   2  -6   1 1784.84   36.63
  -2  -6  -1 1729.27   35.58
  -2  -6  -1 1822.00   36.08
   2   6   1 1857.29   35.92
  -2   6  -1 1789.24   35.94
   2   6   1 1816.63   35.30
  -2   6  -1 1749.80   36.11
   2   6   1 1712.47   35.93
   2  -6   1 1812.82   35.79
   2   6   2  228.28    5.95
  -2  -6  -2  222.65    6.80
  -2   6  -2  207.09    6.69
  -2  -6  -2  225.00    6.52
  -2   6  -2  219.51    6.92
   2   6   2  205.43    6.15
   2  -6   2  228.94    6.37
   2  -6   3  312.29    8.03
  -2   6  -3  304.48    8.88
   2   6   3  305.01    7.73
  -2  -6  -3  327.37    8.77
   2  -6   3  330.36    8.34
  -2  -6  -3  307.37    8.14
   2  -6   3  317.24    8.90
   2   6   3  318.55    8.12
  -2  -6  -3  319.42    9.01
  -2  -6  -4  179.33    5.58
   2   6   4  176.35    5.38
  -2   6  -4  156.39    6.03
   2  -6   4  180.93    5.59
   2  -6   4  178.43    5.44
  -2  -6  -4  175.64    6.26
   2   6   4  169.73    5.08
   2  -6   4  177.49    6.03
  -2  -6  -4  174.89    6.05
   2   6   5  552.50   12.73
  -2  -6  -5  558.98   13.34
   2  -6   5  566.62   13.07
  -2   6  -5  519.66   14.22
   2   6   5  552.85   12.92
   2  -6   5  560.92   13.17
   2  -6   5  576.12   13.87
  -2  -6  -5  553.74   14.41
  -2  -6  -5  566.88   14.20
  -2  -6  -6  112.47    5.36
  -2  -6  -6  114.36    4.66
   2  -6   6  117.45    4.83
   2   6   6  105.76    4.17
   2  -6   6  119.60    4.54
   2  -6   6  122.79    4.53
   2   6   6  116.93    4.37
   2  -6   7 1115.27   24.64
   2   6   7 1161.12   24.42
   2   6   7 1106.49   24.32
  -2  -6  -7 1120.95   26.45
   2  -6   7 1158.43   25.17
  -2  -6  -7 1168.75   25.07
   2  -6   7 1125.21   24.47
   2   6   8   75.05    3.73
   2  -6   8   75.85    3.77
  -2  -6  -8   72.24    3.89
  -2  -6  -8   67.32    4.43
   2   6   8   71.68    3.66
   2  -6   8   75.20    3.97
  -2  -6  -9 1341.34   28.89
   2   6   9 1256.28   27.89
   2  -6   9 1294.46   28.50
   2   6   9 1279.83   28.17
  -2  -6 -10    7.66    1.88
   2  -6  10    7.92    1.56
   2   6  10   10.57    1.70
  -2  -6 -10    6.49    1.56
   2   6  10    7.99    1.71
  -2  -6 -11    4.84    1.38
   2   6  11    9.50    1.98
  -2  -6 -11    8.85    1.93
   2   6  11    8.34    1.83
   2  -6  11    8.29    1.70
   2   6  12   29.70    2.84
   2  -6  12   31.50    2.88
  -2  -6 -12   28.25    2.96
   2   6  12   32.92    3.02
   2   6  13  246.77    9.06
   2  -6  13  243.67    8.92
  -2  -6 -13  251.44    9.57
   2   6  13  260.46    9.48
   2   6  14  110.04    5.98
   2   6  14  101.74    5.70
  -2  -6 -14  106.81    6.11
  -2   8  13  197.44    8.01
   2  -8 -13  186.92    7.67
  -2   8  13  209.75    8.22
  -2  -8  12   12.81    2.11
  -2   8  12   16.21    2.33
   2  -8 -12   12.11    2.28
  -2   8  12   12.71    2.07
   2  -8 -12   13.25    2.12
  -2   8  11    5.86    1.47
   2  -8 -11    7.65    1.79
  -2   8  11    6.95    1.61
  -2  -8  11    7.00    1.72
  -2   8  10    2.92    1.27
   2  -8 -10    4.09    1.55
  -2   8  10    2.65    1.10
  -2  -8  10    1.02    1.01
   2  -8  -9  173.87    6.98
  -2   8   9  180.04    6.67
  -2  -8   9  181.76    7.09
  -2   8   9  191.73    6.88
  -2  -8   8  269.66    8.95
   2  -8  -8  282.64    9.05
  -2   8   8  272.09    8.44
  -2   8   7    0.12    0.85
  -2   8   7    1.19    1.15
  -2  -8   7    0.48    0.78
  -2  -8   7    1.22    1.14
   2  -8  -7    0.61    1.15
  -2   8   6   23.81    2.18
  -2  -8   6   19.85    1.78
  -2  -8   6   22.98    2.36
  -2   8   6   20.52    2.02
  -2   8   5  779.12   17.54
  -2  -8   5  730.86   17.00
   2  -8  -5  797.48   19.07
  -2   8   5  779.59   17.79
  -2  -8   5  777.41   18.57
   2  -8  -5  740.30   19.28
   2  -8  -4  121.75    5.71
  -2  -8   4  133.50    5.57
  -2   8   4  121.32    4.92
   2   8  -4  118.90    5.43
   2   8  -4  133.94    4.71
  -2   8   4  122.74    4.71
   2  -8  -4  126.20    5.63
  -2  -8   4  128.18    4.55
  -2   8   3   10.16    1.59
  -2   8   3   13.12    1.56
   2   8  -3   13.55    1.43
  -2  -8   3    9.66    1.67
   2  -8  -3    8.06    1.45
   2  -8  -3    8.25    1.62
  -2  -8   3    9.56    1.35
   2   8  -3   10.86    1.65
  -2  -8   3   11.87    1.34
   2  -8  -2   24.09    2.42
   2   8  -2   24.50    2.00
   2   8  -2   22.63    2.16
  -2   8   2   24.27    2.05
  -2   8   2   26.18    2.20
   2  -8  -2   26.58    2.35
   2  -8  -2   24.76    2.38
  -2   8   2   22.59    2.25
  -2  -8   2   23.33    2.32
  -2  -8   2   21.47    1.87
  -2  -8   2   22.59    1.80
  -2   8   1  698.97   16.24
   2   8  -1  687.89   15.92
  -2  -8   1  685.96   15.26
  -2   8   1  661.74   16.42
  -2   8   1  671.82   15.73
   2  -8  -1  652.67   16.29
   2   8  -1  691.65   16.55
  -2  -8   1  679.38   15.78
  -2  -8   1  683.15   16.89
   2   8  -1  638.27   15.60
   2  -8  -1  671.76   16.05
   2  -8   0  201.50    7.29
   2  -8   0  192.49    6.47
   2  -8   0  188.15    6.70
   2   8   0  197.92    6.64
   2   8   0  216.50    6.58
   2   8   0  198.54    6.90
  -2   8   0  204.35    7.03
  -2   8   0  196.22    6.85
  -2  -8   0  193.82    6.59
  -2   8   0  205.40    6.74
  -2  -8   0  199.73    6.38
   2  -8   1 1116.07   24.21
  -2  -8  -1 1132.62   24.54
  -2  -8  -1 1104.07   24.91
  -2   8  -1 1121.99   25.36
   2   8   1 1133.09   24.71
  -2   8  -1 1218.47   25.20
   2  -8   1 1110.10   25.45
   2   8   1 1125.72   24.02
   2  -8   1 1098.79   24.47
  -2   8  -1 1116.13   24.67
   2   8   2   45.66    2.87
  -2   8  -2   48.48    3.23
   2   8   2   49.50    2.72
   2  -8   2   46.88    3.22
  -2   8  -2   53.22    3.00
  -2  -8  -2   40.77    2.80
  -2  -8  -2   43.42    3.12
   2  -8   2   42.96    2.60
   2  -8   3  285.66    8.26
  -2  -8  -3  288.59    9.13
   2   8   3  314.63    8.77
   2   8   3  294.96    8.10
  -2   8  -3  310.48    9.64
  -2   8  -3  319.11    8.86
  -2  -8  -3  298.60    9.65
   2  -8   3  305.15    9.51
   2   8   4  220.39    6.79
  -2  -8  -4  202.03    7.40
  -2   8  -4  208.34    7.79
   2  -8   4  202.99    6.45
  -2  -8  -4  204.61    7.86
   2   8   4  209.39    6.28
   2  -8   4  202.97    7.49
  -2  -8  -5 1238.16   25.81
   2   8   5 1211.09   25.51
   2  -8   5 1211.51   26.84
  -2  -8  -5 1171.79   27.06
  -2   8  -5 1117.74   27.34
   2   8   5 1198.31   24.97
   2  -8   5 1106.40   25.09
  -2  -8  -6    5.67    1.42
   2  -8   6    3.43    1.35
   2   8   6    5.63    1.15
  -2  -8  -6    5.00    1.45
   2   8   6    7.89    1.36
   2   8   7    6.89    1.35
  -2  -8  -7    8.96    1.72
   2   8   7    6.57    1.39
   2  -8   7    5.30    1.55
   2   8   8  242.56    7.75
  -2  -8  -8  256.80    8.54
   2  -8   8  266.20    9.13
   2   8   9   81.93    4.22
  -2  -8  -9   81.26    4.48
   2  -8   9   77.71    4.69
   2   8   9   72.09    3.89
   2   8  10  390.38   11.17
   2  -8  10  373.14   12.22
  -2  -8 -10  385.18   11.89
   2   8  10  405.90   11.49
   2  -8  11    8.23    2.00
   2   8  11    7.60    1.72
  -2  -8 -11   10.98    2.10
   2   8  11    5.70    1.59
   2   8  12   13.87    2.15
   2   8  12   19.12    2.45
   2  -8  12   16.09    2.41
  -2  -8 -12   17.90    2.61
  -2  10   9   17.24    2.22
   2 -10  -9   16.20    2.59
  -2 -10   9   15.84    2.36
  -2  10   9   17.92    2.32
   2 -10  -8  180.48    8.06
  -2  10   8  190.42    7.38
  -2  10   8  195.21    7.16
  -2 -10   8  193.12    7.95
  -2  10   7    2.67    1.39
  -2  10   7    1.07    1.28
   2 -10  -7    0.22    1.37
  -2 -10   7    1.43    1.32
  -2  10   6   17.82    2.18
   2 -10  -6   15.22    2.43
  -2  10   6   11.44    1.79
  -2 -10   6   15.90    2.29
   2 -10  -5  212.88    8.66
  -2  10   5  228.25    7.62
  -2  10   5  219.37    7.95
  -2 -10   5  219.07    8.46
  -2  10   4   32.38    2.89
   2  10  -4   24.88    2.78
  -2 -10   4   27.89    2.86
  -2  10   4   29.88    2.63
   2  10  -4   26.67    2.31
   2 -10  -4   23.72    2.80
   2  10  -3   40.20    3.35
  -2  10   3   37.91    2.84
  -2 -10   3   37.01    3.27
   2  10  -3   33.14    2.64
  -2  10   3   36.22    3.01
   2 -10  -3   29.20    3.06
   2  10  -2  418.04   12.30
   2  10  -2  464.61   13.20
  -2  10   2  477.10   13.21
  -2  10   2  473.21   12.68
   2 -10  -2  460.67   13.82
  -2 -10   2  464.43   13.71
   2  10  -1  144.73    5.99
   2  10  -1  121.23    5.53
  -2 -10   1  126.75    6.29
  -2  10   1  134.25    6.08
   2 -10  -1  142.95    6.58
  -2 -10   1  121.10    5.26
  -2  10   1  146.11    5.94
  -2 -10   0    2.50    1.49
  -2  10   0    1.90    1.11
  -2  10   0    4.30    1.36
   2  10   0   -0.40    1.50
  -2 -10   0    2.51    1.17
   2  10   0    5.43    1.52
   2 -10   1    3.06    1.62
  -2  10  -1    0.38    1.33
  -2 -10  -1    1.25    0.99
  -2  10  -1    4.11    1.50
   2  10   1   -0.19    1.35
   2  10   1    1.41    1.02
  -2 -10  -1    0.99    1.35
   2  10   2  665.66   16.54
   2  10   2  671.35   17.30
  -2 -10  -2  692.46   18.51
   2 -10   2  693.62   18.26
  -2  10  -2  694.28   18.02
   2  10   3  227.79    8.04
  -2  10  -3  239.59    8.97
   2 -10   3  224.01    8.75
  -2 -10  -3  204.13    8.51
   2  10   3  229.82    7.41
  -2  10  -4  117.18    6.22
   2  10   4  113.79    5.30
   2 -10   4  108.75    5.94
   2  10   4  114.58    4.91
   2  10   5  550.56   14.47
  -2  10  -5  512.34   16.05
   2  10   5  541.05   13.69
   2 -10   5  551.22   15.64
   2  10   6  170.18    6.66
   2  10   6  162.55    6.12
   2 -10   6  172.07    7.53
   2  10   7   59.46    3.80
   2 -10   7   57.22    4.36
   2  10   8   99.85    5.07
   2 -10   8   91.50    5.57
   2  10   8   98.05    4.67
   2  10   9  116.79    5.58
   2  10   9  110.65    5.15
   2 -10   9  113.52    6.37
  -3   1  17    6.05    2.27
  -3   1  17    5.14    2.20
  -3  -1  17   11.08    3.07
  -3   1  16   27.49    3.53
  -3   1  16   36.42    4.02
  -3  -1  16   29.46    3.91
  -3  -1  15  481.28   15.57
  -3   1  15  466.96   15.05
  -3  -1  14   36.69    3.81
  -3   1  14   36.39    3.58
   3  -1 -14   34.40    1.18
  -3   1  14   39.10    3.69
  -3   1  13   80.33    5.07
   3  -1 -13   83.79    2.41
  -3   1  13   81.20    5.16
  -3  -1  13   84.48    5.42
  -3  -1  12 1562.41   35.68
  -3   1  12 1536.60   35.24
   3  -1 -12 1578.21   30.39
  -3  -1  11  133.35    6.38
  -3   1  11  130.95    6.11
   3  -1 -11  139.81    3.77
  -3  -1  10   36.07    3.02
  -3   1  10   37.65    3.03
   3  -1 -10   40.16    1.71
   3  -1  -9 2044.43   37.06
  -3  -1   9 2048.58   40.77
  -3  -1   8  251.04    8.20
  -3  -1   8  259.77    5.54
   3  -1  -8  248.72    5.97
  -3   1   8  253.82    7.96
   3  -1  -7  866.07   17.05
  -3  -1   7  856.17   16.52
  -3   1   6  575.33   13.43
  -3   1   6  569.45   13.56
   3  -1  -6  587.25   11.85
  -3  -1   6  576.61   11.33
   3  -1  -6  561.47   13.65
  -3   1   5  913.61   19.82
  -3   1   5  947.15   20.03
   3  -1  -5  977.74   20.25
  -3  -1   5  956.00   18.03
  -3  -1   4  186.70    3.88
  -3   1   4  192.64    5.24
  -3   1   4  185.78    5.13
   3  -1  -4  185.43    5.28
  -3   1   3   48.53    1.89
   3  -1  -3   46.62    1.95
  -3   1   3   46.35    1.90
   3  -1  -3   44.99    1.70
   3  -1  -3   46.28    1.41
   3  -1  -3   40.56    1.82
  -3   1   2  174.90    4.35
   3  -1  -2  185.06    4.51
   3  -1  -2  189.33    4.13
  -3   1   2  189.81    4.45
  -3   1   2  181.81    4.41
   3  -1  -2  188.86    4.34
   3  -1   0  437.66    9.67
  -3   1   0  455.19    9.61
   3  -1   0  461.17    9.60
   3  -1   1    8.83    0.53
  -3   1  -1    8.47    0.64
  -3  -1  -1    8.33    0.75
  -3  -1  -1    8.07    0.50
   3  -1   1    8.25    0.57
   3   1   1    8.93    0.47
   3  -1   1    9.33    0.69
  -3  -1  -2  153.76    4.20
   3   1   2  161.58    3.84
   3  -1   2  159.14    4.01
   3  -1   2  149.74    3.82
  -3  -1  -2  150.33    3.85
  -3   1  -2  154.27    3.94
  -3   1  -2  155.57    3.86
  -3  -1  -4  700.12   14.73
   3  -1   4  676.31   14.46
   3   1   4  663.57   14.63
  -3   1  -4  698.56   14.18
   3   1   5  140.27    4.55
  -3  -1  -5  137.27    4.33
   3  -1   5  137.35    4.23
  -3   1  -5  139.14    3.96
   3   1   6 2923.55   59.22
  -3   1  -6 3131.96   58.12
  -3  -1  -6 2954.69   58.72
   3  -1   6 3071.27   58.57
  -3   1  -7 2955.26   56.11
  -3  -1  -7 3007.23   56.96
   3  -1   7 2920.01   56.70
  -3  -1  -8    4.63    0.86
   3   1   8    2.07    0.93
   3  -1   8    4.11    0.84
  -3   1  -8    3.66    0.75
   3  -1   9  738.87   17.00
  -3   1  -9  770.96   16.33
   3   1   9  783.26   18.61
  -3  -1  -9  762.53   17.12
  -3  -1 -10  197.84    6.16
   3   1  10  188.77    7.26
   3  -1  10  183.81    7.49
   3  -1  10  184.98    6.04
  -3   1 -10  184.02    5.46
   3  -1  11 1943.75   42.48
  -3   1 -11 1907.84   38.56
   3   1  11 1973.98   42.04
   3  -1  11 1939.39   39.59
  -3  -1 -11 1994.46   39.60
  -3  -1 -12    5.51    1.11
   3   1  12    2.19    1.38
   3  -1  12    5.30    1.16
  -3   1 -12    5.30    0.90
   3  -1  12    3.40    1.57
  -3  -1 -13  228.88    7.12
   3  -1  13  226.41    9.46
   3   1  13  242.83    9.51
  -3   1 -13  229.66    6.51
   3   1  14   28.63    3.33
  -3   1 -14   28.32    1.88
  -3  -1 -14   33.44    2.27
   3  -1  14   31.90    3.69
   3   1  15  285.35   11.36
   3  -1  15  287.35   11.75
   3   1  16  118.71    7.25
   3  -1  16  126.75    7.62
   3   1  17   32.59    4.17
   3  -1  17   37.45    4.42
  -3   3  17   71.15    5.53
  -3   3  17   67.27    5.53
   3  -3 -17   64.40    4.84
  -3   3  16  168.23    8.31
  -3  -3  16  181.04    9.51
  -3   3  16  159.07    8.11
   3  -3 -16  153.24    7.44
  -3   3  15   57.63    4.66
  -3   3  15   58.66    4.67
  -3  -3  15   61.19    5.30
   3  -3 -14    7.52    1.20
  -3  -3  14    6.45    2.09
  -3   3  14   12.60    2.47
  -3   3  14    8.70    2.05
  -3   3  13  200.03    8.09
  -3  -3  13  206.26    9.13
  -3   3  13  188.50    7.98
   3  -3 -13  196.54    6.22
  -3  -3  13  183.13    5.02
  -3  -3  12 3564.49   66.89
   3  -3 -12 3452.74   68.17
  -3   3  12 3535.52   71.03
  -3   3  12 3525.88   70.87
   3  -3 -11  323.85    8.92
   3  -3 -11  332.10   11.46
  -3   3  11  323.21   10.38
  -3  -3  11  330.43    8.02
  -3   3  11  328.52   10.41
   3  -3 -10  198.01    6.38
  -3   3  10  200.32    7.39
   3  -3 -10  211.91    8.24
  -3   3  10  216.48    7.53
  -3  -3  10  206.47    5.63
  -3   3   9  387.15   10.85
   3  -3  -9  372.46   11.43
  -3   3   9  376.71   10.62
  -3  -3   9  372.18    8.84
  -3  -3   8  327.76    7.68
   3  -3  -8  315.55    8.97
  -3   3   8  300.13    9.10
  -3   3   8  319.95    9.19
  -3  -3   7  254.17    6.28
  -3   3   7  258.22    7.61
   3  -3  -7  260.56    7.44
  -3   3   7  257.11    7.64
   3  -3  -7  265.52    8.23
  -3  -3   6  177.03    5.21
  -3  -3   6  174.33    4.53
   3  -3  -6  176.78    6.01
  -3   3   6  179.02    5.50
  -3   3   6  170.98    5.42
  -3  -3   5 1158.01   23.37
  -3   3   5 1140.31   23.69
   3  -3  -5 1098.01   23.61
   3  -3  -5 1130.51   24.28
  -3   3   5 1145.74   23.76
   3  -3  -4  384.24    9.70
  -3   3   4  408.06    9.33
  -3  -3   4  411.92    9.00
  -3   3   4  398.09    9.31
   3  -3  -4  380.74    9.24
  -3  -3   4  397.44    8.92
   3  -3  -4  381.28    9.68
  -3  -3   3  276.92    6.23
   3  -3  -3  293.06    7.12
  -3   3   3  286.93    6.61
  -3  -3   3  284.33    6.42
   3  -3  -3  266.67    6.92
   3  -3  -3  297.71    6.75
  -3   3   3  277.38    6.96
  -3   3   2   10.24    0.86
   3  -3  -2   10.99    0.98
  -3   3   2   10.54    0.98
   3   3  -2   12.80    0.86
   3  -3  -2   10.30    0.96
  -3  -3   2   11.08    0.83
  -3  -3   2   11.82    0.74
  -3   3   2    8.99    0.83
   3  -3  -2   10.46    0.97
  -3   3   1 1870.51   37.00
   3  -3  -1 1916.52   37.18
   3   3  -1 1825.53   36.60
   3  -3  -1 2050.18   37.34
  -3   3   1 2018.30   37.35
  -3  -3   1 1803.79   36.74
  -3  -3   1 2096.37   36.56
   3  -3  -1 1906.63   37.48
   3   3  -1 1851.23   36.98
  -3   3   1 1900.43   37.06
  -3  -3   0  707.64   14.62
   3  -3   0  769.92   14.96
   3  -3   0  746.47   14.92
  -3  -3   0  739.17   14.36
   3   3   0  709.06   14.69
  -3   3   0  698.92   14.97
   3   3   0  701.17   14.52
  -3   3   0  704.35   14.93
  -3  -3   0  709.40   14.31
   3  -3   1    5.30    0.64
  -3  -3  -1    3.06    0.46
  -3   3  -1    3.23    0.57
  -3  -3  -1    3.12    0.45
  -3   3  -1    2.62    0.54
  -3  -3  -1    5.62    0.64
   3  -3   1    3.57    0.69
   3  -3   1    4.49    0.62
   3   3   1    4.10    0.53
  -3   3  -1    5.36    0.77
   3  -3   2  282.83    7.23
  -3   3  -2  309.93    7.41
   3   3   2  308.26    6.64
   3  -3   2  320.68    7.08
  -3  -3  -2  295.45    6.94
   3  -3   2  299.23    6.98
  -3   3  -2  295.73    7.34
   3   3   2  297.65    6.74
  -3  -3  -2  295.39    6.95
  -3  -3  -2  284.00    7.01
  -3   3  -3 6311.79  119.25
   3  -3   4  262.76    6.79
  -3  -3  -4  267.57    7.12
  -3   3  -4  250.02    7.03
   3   3   4  255.59    6.62
   3   3   4  253.69    6.50
   3  -3   4  264.23    6.67
   3  -3   5    3.31    0.84
  -3   3  -5    2.77    0.68
   3  -3   5    2.70    0.76
   3   3   5    2.17    0.71
  -3  -3  -5    2.34    0.79
   3   3   5    3.88    0.78
  -3  -3  -6 3130.33   61.73
   3  -3   6 3180.03   61.02
   3  -3   6 3063.04   60.82
  -3   3  -6 3238.05   60.43
  -3  -3  -6 3277.65   62.00
   3   3   6 2954.23   61.02
   3   3   6 3126.02   61.09
   3  -3   7 2602.09   50.46
   3  -3   7 2450.45   50.08
  -3  -3  -7 2578.57   51.41
  -3  -3  -7 2511.41   50.95
  -3   3  -7 2516.70   49.48
   3   3   7 2558.43   50.64
   3   3   7 2478.82   50.60
   3   3   8    0.29    0.86
  -3   3  -8    1.56    0.66
  -3  -3  -8    2.31    0.98
   3  -3   8    1.79    0.77
  -3  -3  -8    1.04    0.86
   3  -3   8    0.74    0.81
   3   3   8    1.82    0.96
   3   3   9  104.87    4.87
   3  -3   9  104.11    4.33
  -3   3  -9  108.60    3.88
   3  -3   9  107.54    4.66
  -3  -3  -9  109.13    5.30
   3   3   9  101.95    4.76
  -3  -3  -9  111.79    4.84
   3   3  10   45.13    3.20
  -3   3 -10   46.95    2.43
   3   3  10   43.90    3.23
   3  -3  10   43.85    2.81
  -3  -3 -10   50.67    3.23
   3  -3  10   44.24    3.07
  -3   3 -11  834.73   18.20
   3   3  11  830.56   20.70
   3  -3  11  841.25   19.39
  -3  -3 -11  833.85   19.92
   3   3  11  839.66   20.64
   3   3  12    1.38    1.50
  -3  -3 -12    0.80    1.08
   3   3  12    0.70    1.31
   3  -3  12    1.39    0.93
  -3   3 -13  238.09    7.01
  -3  -3 -13  233.93    8.22
   3   3  13  256.41    9.58
   3  -3  13  255.69    8.13
   3   3  13  258.14    9.65
   3   3  14  397.09   13.26
   3  -3  14  411.49   11.37
  -3  -3 -14  390.84   11.61
   3  -3  14  420.93   14.77
   3   3  14  408.23   13.50
   3   3  15  300.47   11.54
   3   3  15  316.47   11.54
   3  -3  15  279.89   12.23
   3   3  16    8.41    2.35
   3  -3  16    8.90    2.79
   3   3  16   13.27    2.84
  -3   5  16  246.75   10.16
  -3   5  16  249.19   10.05
  -3   5  15   41.09    3.83
  -3   5  15   36.97    3.63
   3  -5 -15   38.29    3.61
  -3   5  14  113.78    6.15
   3  -5 -14  122.22    6.27
  -3   5  14  113.54    6.02
  -3   5  13  140.57    6.51
   3  -5 -13  122.19    5.78
   3  -5 -13  144.12    6.59
  -3  -5  13  132.08    4.99
  -3   5  13  130.99    6.36
  -3   5  12  487.86   13.80
   3  -5 -12  470.47   13.37
   3  -5 -12  478.33   13.76
  -3   5  12  491.26   13.92
  -3  -5  12  478.42   12.13
  -3  -5  11  971.92   21.45
   3  -5 -11 1002.82   23.29
  -3   5  11  969.16   23.02
  -3   5  11  976.51   23.10
  -3   5  10   -0.77    1.20
  -3  -5  10    1.48    1.05
  -3   5  10    1.33    1.14
  -3  -5  10    1.83    0.82
   3  -5 -10    0.25    1.09
  -3  -5   9    5.07    0.97
  -3  -5   9    5.61    1.16
  -3   5   9    5.63    1.35
   3  -5  -9    5.14    1.48
  -3   5   9    5.49    1.32
   3  -5  -9    5.51    1.22
  -3   5   8  434.73   11.65
  -3   5   8  458.74   11.73
  -3  -5   8  425.03   10.83
   3  -5  -8  448.95   13.18
   3  -5  -8  455.99   11.84
  -3  -5   8  449.51   11.36
  -3  -5   7    6.00    1.06
  -3   5   7    6.94    1.29
   3  -5  -7    4.25    1.14
   3  -5  -7    4.67    1.31
  -3   5   7    8.27    1.38
   3  -5  -7    5.78    1.38
  -3  -5   7    4.25    0.89
  -3   5   6    3.67    0.98
  -3   5   6    2.69    0.96
  -3  -5   6    2.74    0.89
  -3  -5   6    5.50    0.97
   3  -5  -6    2.56    1.07
  -3  -5   6    2.08    0.79
   3  -5  -6    1.35    0.90
   3  -5  -6    2.57    0.95
  -3  -5   5  620.97   13.46
   3  -5  -5  617.05   14.07
   3  -5  -5  630.04   15.15
  -3   5   5  577.61   13.75
  -3  -5   5  601.44   13.89
  -3  -5   5  597.60   13.71
  -3   5   5  612.84   13.78
   3  -5  -5  613.58   14.98
  -3  -5   4 1330.37   27.84
   3  -5  -4 1406.97   29.19
   3  -5  -4 1391.02   29.23
   3  -5  -4 1404.12   28.28
  -3   5   4 1332.73   27.89
  -3  -5   4 1355.23   28.38
  -3   5   4 1390.43   28.05
  -3  -5   4 1434.39   27.62
  -3  -5   3   13.00    1.17
   3  -5  -3   15.11    1.52
   3  -5  -3   14.44    1.47
  -3   5   3   14.22    1.22
  -3   5   3   12.36    1.16
   3   5  -3   13.59    1.29
  -3  -5   3   12.99    1.05
   3   5  -2  551.52   11.94
   3  -5  -2  553.02   13.05
  -3  -5   2  555.02   12.29
  -3   5   2  574.93   12.57
   3  -5  -2  568.20   13.23
  -3  -5   2  564.71   11.90
  -3   5   2  552.38   12.38
   3  -5  -2  566.74   12.96
  -3   5   2  564.42   13.07
   3   5  -2  529.53   12.35
  -3   5   1 1285.74   25.84
   3  -5  -1 1289.29   26.04
  -3   5   1 1298.47   26.30
   3   5  -1 1270.82   25.44
   3  -5  -1 1292.31   26.65
   3  -5  -1 1356.71   26.34
  -3  -5   1 1280.76   25.22
  -3  -5   1 1293.21   25.63
  -3   5   1 1291.04   25.98
   3   5  -1 1200.85   25.97
   3   5  -1 1186.84   25.44
  -3  -5   0  380.55    8.77
  -3   5   0  374.34    9.45
  -3   5   0  376.10    9.37
   3  -5   0  400.90    9.29
   3  -5   0  371.22    9.75
   3   5   0  392.18    9.30
  -3   5   0  391.06    9.50
   3   5   0  368.43    9.00
  -3  -5   0  413.90    9.30
   3  -5   0  411.57    9.50
   3   5   0  382.13    8.82
   3   5   1   43.02    2.17
  -3  -5  -1   44.19    2.06
  -3   5  -1   38.87    2.27
  -3   5  -1   42.04    2.41
   3   5   1   42.24    1.89
  -3  -5  -1   45.33    2.26
   3  -5   1   50.60    2.33
   3  -5   1   49.30    2.25
   3  -5   2   14.74    1.52
  -3   5  -2   12.18    1.32
   3  -5   2   15.24    1.31
  -3  -5  -2   14.87    1.37
   3  -5   2   17.94    1.36
   3   5   2   15.78    1.12
  -3  -5  -2   15.20    1.32
  -3   5  -2   15.64    1.54
  -3  -5  -2   15.78    1.22
  -3   5  -3    3.75    0.98
   3   5   3    3.26    0.58
   3  -5   3    4.34    0.84
  -3  -5  -3    2.99    0.77
   3  -5   3    3.31    0.96
  -3  -5  -3    2.76    0.75
  -3  -5  -3    4.50    0.87
   3   5   3    3.46    0.71
   3  -5   3    4.67    0.80
  -3  -5  -4  187.61    5.87
   3  -5   4  188.91    5.53
   3  -5   4  175.04    5.78
   3   5   4  178.81    5.21
   3  -5   4  171.33    5.29
  -3   5  -4  172.05    6.09
   3   5   4  180.85    5.07
  -3  -5  -4  187.61    6.09
  -3  -5  -4  185.57    5.56
   3  -5   5  464.38   11.85
  -3  -5  -5  465.52   11.67
  -3   5  -5  450.83   12.39
   3   5   5  479.01   11.23
   3   5   5  470.71   11.16
   3  -5   5  480.18   11.47
  -3  -5  -5  497.39   12.51
   3  -5   6  755.46   16.94
  -3  -5  -6  726.22   16.73
   3  -5   6  768.10   16.53
  -3  -5  -6  747.58   17.73
   3   5   6  717.58   16.20
   3  -5   7  337.84    9.25
   3   5   7  345.36    9.26
  -3  -5  -7  334.17   10.41
   3   5   7  345.84    9.34
   3  -5   7  349.05    9.66
   3  -5   7  360.58    9.46
  -3  -5  -7  332.00    9.58
   3   5   8  248.54    7.57
   3  -5   8  238.82    7.70
   3  -5   8  246.25    7.50
   3   5   8  246.01    7.68
   3  -5   8  228.48    7.44
  -3  -5  -8  259.74    8.89
  -3  -5  -8  237.68    7.82
  -3  -5  -9   48.50    3.58
   3  -5   9   46.10    3.02
   3   5   9   47.05    3.01
  -3  -5  -9   45.14    3.60
   3   5   9   48.33    3.16
   3  -5   9   49.79    3.18
   3  -5  10  634.84   15.89
   3   5  10  616.02   15.60
  -3  -5 -10  595.64   16.63
   3  -5  11    2.64    1.05
   3   5  11    0.45    1.31
  -3  -5 -11    1.28    1.08
   3   5  11    1.65    1.12
  -3  -5 -12   86.68    5.13
   3  -5  12   87.59    4.66
   3   5  12   82.98    4.73
   3   5  12   80.75    4.78
   3   5  13   44.92    3.67
   3   5  13   46.91    3.74
   3  -5  13   49.51    3.61
   3   5  14  517.77   15.21
   3   5  14  529.46   15.61
   3  -5  14  502.93   14.27
   3   5  15  208.22    8.76
  -3  -5 -15  204.92    8.92
   3   5  15  207.50    8.98
   3  -7 -14    6.69    1.92
  -3   7  14   11.32    2.28
  -3   7  14   11.45    2.32
   3  -7 -14    6.57    1.51
  -3   7  13   22.35    2.74
   3  -7 -13   22.64    2.42
  -3   7  13   25.28    2.95
   3  -7 -13   21.36    2.80
  -3   7  12  245.81    8.85
  -3   7  12  249.23    8.83
  -3  -7  12  245.98    8.49
   3  -7 -12  241.10    8.34
   3  -7 -12  241.25    9.02
   3  -7 -11    1.63    1.26
  -3   7  11    2.73    1.43
  -3  -7  11    1.80    1.26
  -3   7  10   82.74    4.43
  -3   7  10   91.99    4.60
   3  -7 -10   79.25    4.48
  -3  -7  10   81.91    4.25
  -3  -7   9   33.26    2.65
   3  -7  -9   36.40    2.88
  -3   7   9   29.39    2.52
  -3   7   9   32.77    2.65
  -3   7   8 2676.25   52.75
   3  -7  -8 2681.84   53.12
  -3   7   8 2673.33   52.69
  -3  -7   8 2532.13   52.63
  -3  -7   8 2539.07   52.16
  -3   7   7   78.60    3.82
  -3   7   7   75.24    3.72
  -3  -7   7   80.86    3.96
  -3  -7   7   75.25    3.47
   3  -7  -7   76.90    3.97
   3  -7  -7   74.67    4.63
  -3  -7   6    6.99    1.12
   3  -7  -6    6.70    1.68
   3  -7  -6    6.68    1.32
   3  -7  -6    6.32    1.55
  -3   7   6   10.30    1.49
  -3  -7   6    9.14    1.51
  -3   7   6    7.02    1.23
  -3  -7   6    4.96    1.07
   3  -7  -5   78.83    4.52
  -3  -7   5   76.31    3.23
  -3  -7   5   72.92    3.78
   3  -7  -5   71.58    4.24
  -3   7   5   86.55    3.65
  -3  -7   5   75.84    3.48
  -3   7   5   78.54    3.58
   3  -7  -5   79.07    4.09
  -3  -7   4  485.31   11.82
  -3  -7   4  475.35   11.27
   3  -7  -4  488.38   13.20
   3  -7  -4  461.28   13.27
  -3   7   4  486.67   11.83
   3  -7  -4  459.24   12.75
  -3  -7   4  484.29   12.69
  -3   7   4  503.93   12.07
   3   7  -4  506.72   12.72
   3   7  -4  510.12   11.51
   3  -7  -3   -0.19    0.92
  -3  -7   3   -0.69    0.93
  -3   7   3    0.58    0.74
   3   7  -3    0.91    0.72
  -3   7   3   -1.03    1.10
  -3  -7   3    0.79    0.62
  -3  -7   3    0.82    0.79
  -3   7   3    0.87    0.94
   3   7  -3    0.54    0.82
   3  -7  -3    3.44    1.35
  -3  -7   2  280.11    7.14
  -3   7   2  273.02    7.62
   3  -7  -2  270.45    8.20
   3  -7  -2  277.38    8.41
  -3   7   2  262.71    8.24
  -3   7   2  266.37    7.81
   3  -7  -2  277.57    8.59
   3   7  -2  258.53    7.71
   3   7  -2  264.75    7.34
  -3  -7   2  278.80    7.53
  -3   7   1   98.09    3.96
   3   7  -1   91.75    3.75
   3  -7  -1   96.19    4.20
   3   7  -1   88.66    3.65
  -3  -7   1   97.34    3.83
  -3   7   1   95.10    4.05
   3  -7  -1   95.59    4.08
  -3   7   1   88.67    4.11
  -3  -7   1   92.70    3.49
   3   7  -1   86.72    4.03
   3  -7  -1   88.84    4.45
   3  -7   0 1633.67   35.40
  -3   7   0 1655.68   34.74
  -3   7   0 1697.51   34.93
   3   7   0 1659.71   34.06
  -3  -7   0 1703.47   34.03
   3  -7   0 1783.41   34.90
  -3  -7   0 1774.98   34.66
   3   7   0 1702.71   34.83
   3  -7   0 1683.36   34.44
   3   7   0 1656.70   34.42
  -3   7   0 1620.06   34.90
  -3  -7  -1   11.09    1.53
   3   7   1   10.05    1.34
  -3   7  -1    9.07    1.39
   3   7   1   10.56    1.18
   3  -7   1   10.13    1.26
  -3   7  -1    9.70    1.25
  -3   7  -1    9.81    1.42
  -3  -7  -1   10.54    1.26
   3  -7   1    9.25    1.26
   3  -7   1   13.37    1.75
   3  -7   2  914.71   20.38
   3   7   2  856.04   18.53
  -3  -7  -2  854.56   19.87
  -3  -7  -2  885.73   19.50
  -3   7  -2  898.81   20.36
   3  -7   2  912.99   19.12
   3  -7   2  840.36   19.15
   3   7   2  882.70   19.29
  -3   7  -2  831.15   19.93
  -3   7  -3  191.04    6.90
  -3  -7  -3  193.15    6.79
  -3  -7  -3  203.33    6.60
   3  -7   3  194.32    6.88
   3  -7   3  196.05    6.00
   3   7   3  195.36    6.03
   3  -7   3  193.02    6.12
   3  -7   4   29.58    2.01
  -3  -7  -4   18.43    2.05
   3   7   4   22.76    1.85
  -3  -7  -4   22.82    2.09
  -3   7  -4   17.93    2.09
  -3  -7  -4   24.02    1.90
   3  -7   4   20.61    1.81
   3   7   4   19.23    1.59
   3  -7   4   25.54    2.30
  -3  -7  -5   68.37    3.36
   3  -7   5   74.61    3.96
  -3  -7  -5   70.42    4.16
  -3   7  -5   64.20    3.99
   3   7   5   69.61    3.26
   3  -7   5   65.55    3.21
  -3  -7  -5   66.80    3.82
   3  -7   5   64.71    3.31
  -3  -7  -6   49.28    2.99
  -3  -7  -6   47.55    3.58
   3  -7   6   50.76    3.34
   3   7   6   51.89    2.74
   3  -7   6   48.70    2.87
  -3  -7  -7  301.76   10.47
  -3  -7  -7  314.90    9.23
   3  -7   7  290.23    9.50
   3   7   7  293.64    8.53
   3   7   7  305.75    8.48
   3  -7   8   54.82    3.64
   3   7   8   52.38    3.14
   3   7   8   50.28    3.09
  -3  -7  -8   56.98    3.52
   3   7   9  132.11    5.38
   3   7   9  134.61    5.43
  -3  -7  -9  121.07    5.61
   3  -7   9  136.87    6.09
  -3  -7 -10 1177.09   27.15
   3  -7  10 1113.44   27.35
   3   7  10 1174.71   26.38
   3   7  11   74.07    4.25
   3   7  11   75.18    4.30
   3  -7  11   69.39    4.55
  -3  -7 -11   75.86    4.57
   3   7  12   29.36    2.91
   3   7  12   30.20    2.89
   3  -7  12   25.22    2.87
  -3  -7 -12   24.93    2.87
  -3  -7 -13    0.49    1.41
   3  -7  13    1.04    1.37
   3   7  13   -0.23    1.23
   3   7  13    2.96    1.70
  -3   9  11   85.34    4.75
  -3  -9  11   81.85    5.00
   3  -9 -11   88.30    5.22
   3  -9 -11   86.93    5.13
  -3   9  11   83.62    4.87
   3  -9 -10    2.77    1.63
  -3   9  10    0.23    1.17
  -3   9  10    1.39    1.34
   3  -9 -10    2.70    1.54
  -3  -9  10   -0.75    1.45
  -3  -9   9    8.81    1.78
   3  -9  -9   11.07    2.08
  -3   9   9   11.63    1.91
  -3   9   9    8.45    1.77
  -3   9   8  697.27   17.55
  -3  -9   8  724.96   18.29
   3  -9  -8  702.87   18.60
  -3   9   8  714.37   17.42
  -3   9   7   92.82    4.59
   3  -9  -7   93.77    5.27
  -3  -9   7   92.80    4.90
  -3   9   7   96.87    4.54
  -3  -9   6  110.08    5.36
  -3   9   6  103.55    4.87
   3  -9  -6  106.03    5.53
   3   9  -6  105.86    4.31
  -3   9   6  112.89    4.83
   3  -9  -5  276.52    9.41
  -3  -9   5  252.49    8.80
  -3   9   5  251.39    8.24
   3   9  -5  259.59    7.56
  -3   9   5  264.93    8.04
   3   9  -4 1151.33   26.25
  -3   9   4 1200.94   25.55
  -3  -9   4 1141.45   26.14
   3   9  -4 1128.01   24.45
   3  -9  -4 1164.51   26.79
  -3   9   4 1142.31   24.92
   3  -9  -3   50.65    3.66
   3   9  -3   50.62    2.94
  -3  -9   3   48.78    2.74
  -3   9   3   58.23    3.29
  -3  -9   3   50.58    3.60
  -3   9   3   45.48    3.18
   3   9  -3   50.94    3.43
  -3   9   2  535.05   13.46
   3   9  -2  494.95   13.02
   3   9  -2  522.26   13.70
  -3  -9   2  511.32   12.66
   3  -9  -2  506.89   14.39
  -3   9   2  535.30   13.81
  -3  -9   2  528.99   14.51
  -3  -9   1  129.95    4.98
  -3   9   1  141.07    5.59
   3   9  -1  117.48    5.07
   3   9  -1  141.70    5.98
  -3  -9   1  124.80    5.88
   3   9  -1  131.10    5.35
  -3   9   1  138.86    5.74
   3  -9  -1  135.83    6.07
   3   9   0  151.96    6.20
   3  -9   0  162.17    6.70
  -3   9   0  158.87    6.46
   3   9   0  159.36    5.75
  -3   9   0  145.35    6.09
  -3  -9   0  142.11    5.48
  -3   9   0  160.98    6.17
   3  -9   1   20.99    2.43
   3   9   1   18.87    1.78
  -3   9  -1   18.84    2.08
  -3   9  -1   21.24    2.40
   3   9   1   18.39    2.03
  -3  -9  -1   19.93    2.00
  -3   9  -1   17.57    2.17
  -3   9  -2  279.18    8.80
   3   9   2  273.72    8.10
  -3  -9  -2  275.81    8.94
   3  -9   2  285.11    9.55
  -3   9  -2  292.52    9.56
   3   9   2  293.80    8.89
  -3   9  -3  143.15    6.31
  -3   9  -3  132.41    5.53
   3   9   3  141.26    5.60
   3  -9   3  135.95    6.22
  -3  -9  -3  125.40    5.73
   3   9   3  143.85    5.18
   3   9   4  579.06   14.70
   3   9   4  618.66   14.19
  -3   9  -4  590.03   16.40
   3  -9   4  588.90   15.96
  -3  -9  -5   13.81    2.14
   3  -9   5   16.52    2.28
   3   9   5   18.14    1.85
  -3   9  -5   18.92    2.59
   3   9   5   16.35    1.96
   3   9   6  263.58    8.28
   3   9   6  257.48    7.80
   3  -9   6  263.93    9.44
  -3  -9  -7  479.22   12.91
   3   9   7  458.60   12.41
   3  -9   7  447.42   13.68
   3   9   7  460.71   11.97
   3   9   8   14.53    1.83
   3   9   8   15.87    2.01
   3  -9   8   18.07    2.42
  -3  -9  -8   17.81    2.24
  -3  -9  -9   12.26    2.05
   3   9   9   11.31    1.88
   3  -9   9   11.58    2.17
   3   9   9    8.50    1.56
   3  -9  10  192.93    8.49
   3   9  10  194.25    7.32
  -3  -9 -10  191.60    7.78
   3   9  10  184.62    6.97
   3   9  11   49.11    3.56
  -3  -9 -11   56.38    4.23
   3  -9  11   51.11    4.41
  -3  11   6   19.23    2.54
  -3 -11   6   12.18    2.23
   3 -11  -6   13.54    2.40
  -3  11   6   14.28    2.17
   3 -11  -5  364.11   12.41
  -3 -11   5  342.15   11.87
  -3  11   5  363.55   11.48
  -3  11   5  364.87   11.09
  -3  11   4  144.74    6.21
   3 -11  -4  142.28    7.11
  -3  11   4  147.14    6.63
   3  11  -4  144.06    6.93
  -3 -11   4  132.76    6.72
   3  11  -3  101.95    5.64
  -3  11   3  112.86    5.74
  -3  11   3  104.22    5.22
  -3 -11   2   10.59    2.05
   3  11  -2    9.68    1.86
  -3  11   2   10.60    1.98
   3 -11  -2   11.15    2.47
  -3  11   2    7.43    1.64
   3  11  -1  250.49    8.73
  -3  11   1  239.95    8.72
   3 -11  -1  224.25    9.21
  -3  11   1  241.30    9.13
  -3 -11   1  220.45    9.19
   3  11   0   54.23    4.04
  -3  11   0   56.21    4.22
   3 -11   0   60.53    4.50
  -3  11   0   58.90    4.13
  -3 -11   0   57.90    4.38
   3  11   0   56.48    3.78
   3 -11   1   56.35    4.40
   3  11   1   65.28    4.38
   3  11   1   67.95    4.07
  -3  11  -1   74.72    4.69
  -3 -11  -1   58.55    4.55
  -3 -11  -2    5.25    1.69
  -3  11  -2    4.50    1.73
   3  11   2    5.27    1.57
   3 -11   2    5.54    2.06
   3  11   2    5.73    1.35
  -3  11  -3  190.86    8.43
   3 -11   3  195.71    8.43
  -3 -11  -3  189.19    8.43
   3  11   3  195.10    7.10
   3  11   3  193.57    7.75
   3  11   4  314.12   10.32
   3 -11   4  301.72   11.20
   3  11   4  306.36    9.43
  -3 -11  -4  296.79   11.22
  -3  11  -4  315.44   11.59
   3 -11   5   40.17    3.77
   3  11   5   49.20    3.63
   3  11   5   44.50    3.11
  -3 -11  -5   34.32    3.67
  -3  11  -5   40.28    4.08
   3  11   6  114.89    5.62
   3  11   6  105.37    4.94
   3 -11   6  107.94    6.29
  -4   0  17   -1.54    2.11
  -4   0  17   -0.60    2.00
  -4   0  16   26.02    3.35
  -4   0  16   35.11    3.93
  -4   0  15   -1.92    1.89
  -4   0  14  358.18   12.67
  -4   0  13   -1.17    1.61
  -4   0  12 2304.69   49.23
  -4   0  11   -0.34    0.99
  -4   0  10 4578.74   90.23
  -4   0   9    0.00    0.95
  -4   0   8 1138.16   25.05
  -4   0   7   -0.42    0.82
  -4   0   6 1384.79   28.67
  -4   0   5    0.79    0.62
  -4   0   4   13.11    1.09
  -4   0   3    0.43    0.37
   4   0  -3    0.22    0.31
  -4   0   3    0.75    0.37
  -4   0   1    0.53    0.16
   4   0  -1    0.36    0.17
  -4   0   1    0.12    0.20
   4   0  -1    0.43    0.17
  -4   0  -1    0.19    0.32
  -4   0  -1    0.18    0.18
   4   0   1    0.36    0.20
   4   0   1    0.17    0.27
  -4   0  -2  119.37    3.43
   4   0   2  117.60    3.47
  -4   0  -3    0.54    0.36
   4   0   3    0.30    0.43
  -4   0  -4  125.89    3.89
   4   0   4  125.93    3.99
   4   0   5    0.64    0.55
  -4   0  -5    1.22    0.64
   4   0   6 1675.12   34.50
   4   0   6 1660.87   35.15
   4   0   7    0.87    0.75
  -4   0  -7    0.94    0.57
   4   0   7    0.28    0.79
   4   0   8 1175.98   26.81
  -4   0  -8 1239.20   25.52
   4   0   8 1251.78   25.94
   4   0   9    0.35    0.78
  -4   0  -9   -0.22    0.57
   4   0   9   -0.28    0.91
   4   0  10  183.19    7.33
   4   0  10  199.03    6.44
  -4   0 -10  198.26    6.11
  -4   0 -11    0.55    0.64
   4   0  11    0.46    1.26
   4   0  12    8.57    2.02
  -4   0 -12    6.35    1.11
   4   0  13    1.18    1.63
  -4   0 -13   -0.10    0.63
   4   0  14   58.39    4.65
  -4   0 -14   55.33    2.92
   4   0  15    0.90    1.60
   4   0  16  133.75    7.90
  -4  -2  17   77.18    6.33
  -4   2  17   81.95    6.04
  -4   2  17   75.25    5.76
  -4   2  16   19.20    3.06
  -4   2  16   28.59    3.66
  -4  -2  16   24.20    3.49
  -4   2  15  378.84   13.19
  -4  -2  15  395.86   14.23
  -4   2  15  397.77   13.54
   4  -2 -14  339.71    7.64
  -4   2  14  369.33   12.47
  -4   2  14  379.29   12.39
  -4  -2  14  360.47   13.01
   4  -2 -14  364.53    7.92
   4  -2 -13    5.84    0.78
  -4  -2  13    1.92    1.54
  -4   2  13    2.62    1.52
  -4   2  13    2.59    1.53
  -4   2  12   97.92    5.30
  -4   2  12   93.15    5.25
  -4  -2  12  106.08    5.93
   4  -2 -12   99.63    3.40
  -4   2  11  353.89   11.18
   4  -2 -11  366.16    8.62
  -4  -2  11  369.82   11.93
  -4   2  11  341.42   10.95
  -4  -2  10  187.83    4.28
   4  -2 -10  189.79    5.18
  -4   2   9    3.86    1.21
   4  -2  -9    6.23    1.47
  -4  -2   9    4.45    0.52
  -4   2   9    4.00    1.14
   4  -2  -9    4.75    0.76
  -4   2   8   83.11    3.98
  -4  -2   8   90.36    2.59
  -4   2   8   94.54    4.25
   4  -2  -8   92.53    4.51
  -4  -2   7  209.33    4.66
  -4   2   7  207.97    6.53
  -4   2   6 2453.02   50.72
  -4   2   6 2341.98   50.48
   4  -2  -6 2420.33   50.25
  -4  -2   6 2378.64   48.73
  -4   2   5  477.30   11.09
   4  -2  -5  497.03   10.89
   4  -2  -5  479.04   11.45
  -4  -2   5  482.35    9.69
  -4   2   4  615.31   12.57
   4  -2  -4  603.82   11.83
   4  -2  -4  627.05   12.89
   4  -2  -4  608.05   12.89
   4  -2  -3  991.14   18.36
   4  -2  -3  970.52   17.90
  -4   2   3 1003.76   17.95
   4  -2  -3  986.51   18.36
  -4   2   3  979.20   18.16
   4  -2  -3  995.27   17.69
   4   2  -1  314.35    6.39
  -4   2   1  332.16    6.92
  -4  -2   1  312.18    6.60
  -4   2   1  314.09    6.95
  -4  -2   1  320.88    6.31
   4  -2  -1  309.69    7.14
   4  -2  -1  326.20    7.10
  -4   2   1  318.11    7.19
   4  -2  -1  310.66    7.04
  -4  -2   0   64.35    1.82
  -4   2   0   67.51    2.29
  -4  -2   0   66.12    1.61
  -4   2   0   66.35    2.20
   4  -2   0   65.64    2.16
   4  -2   0   64.82    2.28
   4   2   0   67.44    1.87
  -4   2   0   65.44    2.13
   4   2   0   69.44    1.59
   4   2   1   52.76    1.47
  -4   2  -1   50.95    1.95
  -4   2  -1   50.15    1.95
  -4  -2  -1   52.40    1.66
   4  -2   1   53.20    1.86
   4  -2   1   51.39    2.01
   4  -2   1   50.26    1.77
   4   2   1   50.80    1.52
  -4   2  -1   49.40    1.85
   4  -2   3 2058.94   40.12
   4   2   3 1983.80   39.89
   4  -2   3 2052.39   40.35
  -4   2  -3 2045.38   40.47
  -4  -2  -3 1989.06   40.23
  -4  -2  -3 2098.99   41.01
   4   2   3 1940.47   39.94
  -4  -2  -4 1737.24   35.06
  -4   2  -4 1830.60   34.21
   4  -2   4 1799.07   34.59
   4  -2   4 1662.96   34.25
  -4  -2  -4 1893.48   34.90
   4   2   4 1655.06   34.23
  -4  -2  -5  171.56    5.44
  -4  -2  -5  178.58    5.41
   4   2   5  160.31    5.05
   4  -2   5  170.92    5.10
  -4   2  -5  169.71    4.73
   4   2   6  513.96   11.83
  -4   2  -6  504.40   10.96
   4  -2   6  500.05   11.49
  -4  -2  -6  492.32   11.87
  -4   2  -7    2.53    0.66
   4  -2   7    3.04    0.76
  -4  -2  -7    2.33    0.89
   4  -2   7    2.21    0.82
   4   2   7    2.89    0.98
  -4  -2  -8  448.65   11.50
  -4   2  -8  432.66   10.29
   4  -2   8  438.72   11.11
   4   2   8  428.95   11.67
   4  -2   8  435.96   11.40
   4  -2   9   11.08    1.44
  -4  -2  -9    8.98    1.39
   4  -2   9    8.83    1.41
  -4   2  -9   11.62    1.18
   4   2   9   10.28    1.63
  -4  -2 -10  125.05    5.09
   4  -2  10  121.68    4.87
   4  -2  10  121.38    5.30
  -4   2 -10  120.80    4.21
   4   2  10  119.83    5.55
  -4   2 -11  252.12    7.10
   4   2  11  256.23    9.05
  -4  -2 -11  253.24    8.10
   4  -2  11  257.63    8.00
  -4  -2 -12  579.01   15.09
   4  -2  12  605.17   15.06
   4   2  12  600.73   16.66
  -4   2 -12  608.39   13.82
   4  -2  13    0.32    1.59
   4   2  13    1.25    1.37
  -4   2 -13    0.17    0.63
  -4  -2 -13    1.02    0.94
   4  -2  13    1.69    0.97
   4  -2  14  385.07   13.80
   4  -2  14  402.44   11.03
  -4  -2 -14  361.96   10.67
  -4   2 -14  361.19    9.63
   4   2  14  406.93   13.26
   4  -2  15   35.59    4.17
   4   2  15   26.82    3.41
   4   2  15   30.75    3.64
   4   2  16  181.53    9.18
   4   2  16  187.93    9.05
   4  -2  16  183.35    9.62
  -4   4  16   49.70    4.38
  -4   4  16   63.20    4.85
  -4  -4  16   52.06    5.25
   4  -4 -16   58.78    4.50
  -4  -4  15  307.84   12.54
   4  -4 -15  275.00   10.33
  -4   4  15  292.06   10.97
  -4   4  15  285.05   10.79
   4  -4 -14  217.45    8.46
   4  -4 -14  205.69    6.23
  -4   4  14  218.83    8.82
  -4   4  14  217.55    8.79
  -4  -4  13   49.62    2.34
   4  -4 -13   45.14    3.47
   4  -4 -13   42.59    2.90
  -4   4  13   43.32    3.64
  -4   4  13   45.19    3.53
  -4  -4  12  194.57    5.61
   4  -4 -12  179.30    6.50
  -4   4  12  181.18    7.39
   4  -4 -12  191.59    7.36
  -4   4  12  188.69    7.57
  -4  -4  11  204.34    5.93
  -4  -4  11  215.57    7.56
   4  -4 -11  205.72    6.92
  -4   4  11  204.01    7.69
   4  -4 -11  196.35    7.36
  -4  -4  10  219.75    6.17
   4  -4 -10  216.42    8.60
  -4  -4  10  223.60    7.44
  -4   4  10  214.48    7.67
   4  -4 -10  214.95    7.44
  -4   4  10  210.58    7.53
  -4  -4   9   67.18    3.47
  -4   4   9   63.19    3.63
   4  -4  -9   61.75    4.15
   4  -4  -9   69.74    3.72
  -4   4   9   63.10    3.56
  -4  -4   9   59.49    2.64
   4  -4  -8  199.08    7.53
  -4  -4   8  196.30    5.54
  -4   4   8  198.38    6.62
  -4  -4   8  208.91    6.45
  -4   4   8  215.66    6.81
  -4   4   7 1014.50   22.34
   4  -4  -7 1057.06   22.37
  -4  -4   7 1015.28   21.11
  -4  -4   7 1055.62   21.94
  -4   4   7  975.10   22.10
   4  -4  -7 1028.04   23.54
  -4  -4   6   14.53    1.31
  -4   4   6   14.73    1.51
  -4   4   6   14.55    1.46
   4  -4  -6   15.28    1.72
  -4  -4   6   13.73    1.20
   4  -4  -6   12.87    1.60
   4  -4  -6   15.41    1.50
  -4  -4   5   42.39    2.08
   4  -4  -5   53.72    2.60
   4  -4  -5   44.62    2.73
  -4   4   5   43.51    2.34
  -4   4   5   47.52    2.41
   4  -4  -5   45.75    2.75
  -4  -4   5   47.36    2.24
   4  -4  -4  534.22   12.17
  -4  -4   4  517.42   10.80
  -4   4   4  514.13   11.24
  -4   4   4  497.82   11.89
   4  -4  -4  502.08   11.47
  -4  -4   4  485.68   10.94
   4  -4  -4  497.08   12.06
   4  -4  -4  508.01   11.36
  -4   4   3 2603.44   48.86
   4  -4  -3 2483.20   48.76
  -4   4   3 2472.79   47.98
   4  -4  -3 2519.50   48.66
  -4   4   3 2373.91   47.93
  -4  -4   3 2496.06   47.80
   4  -4  -3 2682.74   49.09
  -4  -4   3 2393.94   47.36
   4   4  -2  614.53   13.05
   4  -4  -2  619.41   13.84
  -4   4   2  618.92   13.31
   4  -4  -2  604.95   13.71
  -4   4   2  617.75   13.30
  -4  -4   2  625.33   12.70
   4  -4  -2  624.06   13.93
  -4   4   2  632.53   13.84
   4   4  -2  631.21   12.59
  -4  -4   2  607.12   13.05
  -4   4   1 1114.94   20.91
   4   4  -1 1030.19   20.77
   4  -4  -1 1001.25   21.24
  -4  -4   1 1047.74   20.01
   4   4  -1 1039.60   20.16
  -4  -4   1 1122.40   20.58
  -4   4   1 1083.79   20.89
   4   4  -1 1041.93   20.28
  -4   4   1 1032.77   21.14
   4  -4  -1 1106.83   21.11
   4   4   0   73.36    2.32
  -4   4   0   67.97    2.77
  -4  -4   0   73.01    2.31
   4  -4   0   71.62    3.01
  -4   4   0   71.06    2.83
   4   4   0   73.33    2.61
   4  -4   0   76.01    2.77
   4  -4   0   73.26    2.76
   4  -4   1  193.65    5.20
   4   4   1  180.05    4.89
  -4  -4  -1  204.03    5.18
  -4   4  -1  188.16    5.48
  -4  -4  -1  191.56    4.85
   4   4   1  193.51    4.60
  -4  -4  -1  183.46    4.78
   4  -4   1  187.77    5.59
   4  -4   1  195.60    5.18
  -4   4  -1  194.79    5.56
  -4   4  -2   -0.15    0.63
   4  -4   2    0.46    0.54
  -4   4  -2    0.89    0.71
  -4  -4  -2    0.71    0.52
   4  -4   2    0.52    0.45
   4   4   2    0.57    0.40
   4  -4   2    1.56    0.76
  -4  -4  -2    2.05    0.55
   4   4   2    0.88    0.49
  -4  -4  -2    0.04    0.46
  -4   4  -2    1.16    0.59
   4  -4   3 2673.80   52.09
  -4   4  -3 2404.59   52.05
  -4  -4  -3 2756.53   51.63
   4   4   3 2507.04   51.01
   4  -4   3 2886.57   51.64
  -4   4  -3 2841.81   52.27
  -4  -4  -3 2699.53   51.90
   4  -4   3 2579.18   51.40
  -4  -4  -3 2770.17   51.73
   4   4   3 2610.24   50.88
   4  -4   4  286.75    7.33
  -4   4  -4  286.97    7.66
   4  -4   4  291.95    7.34
  -4   4  -4  289.99    8.07
   4   4   4  278.92    7.07
  -4  -4  -4  294.49    7.84
   4   4   4  261.58    6.94
   4  -4   4  280.72    7.69
   4   4   5  565.96   12.78
   4  -4   5  549.54   13.22
  -4  -4  -5  559.62   13.60
  -4   4  -5  551.94   12.97
   4   4   5  532.25   12.55
   4  -4   5  563.58   12.79
  -4  -4  -6  208.50    7.01
   4  -4   6  202.72    6.25
  -4   4  -6  209.46    6.24
   4  -4   6  211.72    6.56
   4   4   6  210.56    6.19
   4   4   6  222.34    6.42
   4  -4   7  330.78    9.06
  -4  -4  -7  339.05   10.12
  -4   4  -7  339.82    8.84
   4   4   7  333.81    9.07
  -4  -4  -7  335.29   10.00
   4   4   7  329.08    9.17
   4  -4   7  335.54    9.27
   4   4   8  141.78    5.55
   4  -4   8  165.70    5.73
  -4  -4  -8  150.52    6.16
  -4   4  -8  148.23    5.08
  -4  -4  -8  147.76    6.17
   4  -4   8  152.62    5.63
   4   4   8  144.11    5.46
   4  -4   9   30.03    2.44
   4  -4   9   31.87    2.47
  -4  -4  -9   36.02    2.94
  -4  -4  -9   32.91    3.02
   4   4   9   29.44    2.52
   4   4   9   22.58    2.16
  -4   4  -9   30.58    2.12
  -4  -4 -10   54.35    3.68
   4   4  10   46.29    3.29
  -4   4 -10   51.10    2.80
   4  -4  10   46.42    3.14
  -4  -4 -10   54.12    3.97
   4   4  10   46.49    3.21
   4  -4  11 1123.05   25.25
   4   4  11 1146.92   25.97
   4   4  11 1105.28   25.67
  -4   4 -11 1087.67   23.95
  -4  -4 -11 1090.66   25.97
  -4  -4 -12  158.87    7.00
   4   4  12  182.90    7.48
  -4   4 -12  161.54    5.80
   4   4  12  180.48    7.32
   4  -4  12  177.68    6.84
  -4  -4 -13   33.13    3.06
   4   4  13   38.49    3.54
  -4   4 -13   31.80    2.36
   4  -4  13   34.98    2.94
   4   4  13   39.06    3.47
   4  -4  14  170.55    6.86
   4   4  14  177.35    8.03
   4   4  14  172.63    7.81
   4   4  15  360.26   12.53
   4   4  15  369.15   12.93
   4  -6 -15   22.36    2.86
  -4   6  15   20.71    2.96
  -4   6  14  107.10    5.83
   4  -6 -14  105.79    5.88
   4  -6 -14   97.98    4.61
   4  -6 -13    1.17    1.33
  -4   6  13    2.85    1.52
  -4  -6  13    2.16    0.86
  -4   6  13    3.64    1.71
   4  -6 -13    1.11    0.94
   4  -6 -12   -0.64    1.19
  -4  -6  12    1.59    0.91
  -4   6  12    1.58    1.43
  -4   6  12    1.22    1.34
   4  -6 -12    0.78    0.92
  -4   6  11 1315.13   29.62
  -4   6  11 1339.56   29.86
  -4  -6  11 1327.59   28.48
   4  -6 -11 1313.04   28.68
   4  -6 -11 1371.42   30.08
  -4   6  10  125.51    5.47
  -4  -6  10  112.02    4.74
  -4   6  10  126.60    5.49
   4  -6 -10  124.53    5.54
  -4   6   9    5.76    1.42
  -4   6   9    3.89    1.37
  -4  -6   9    2.16    0.82
  -4  -6   9    2.90    1.12
   4  -6  -9    4.25    1.41
  -4  -6   8  242.67    7.36
  -4   6   8  239.77    7.64
  -4   6   8  241.67    7.67
  -4  -6   8  235.71    7.54
   4  -6  -8  262.97    8.06
  -4  -6   8  245.26    7.38
  -4   6   7 1012.94   23.16
   4  -6  -7 1064.16   25.54
  -4   6   7 1057.00   23.27
   4  -6  -7 1090.11   25.28
  -4  -6   7 1104.87   23.43
  -4  -6   7 1112.47   23.32
   4  -6  -7 1061.18   23.60
  -4  -6   7 1079.84   22.88
   4  -6  -6   95.41    4.16
   4  -6  -6   96.28    5.00
  -4  -6   6   99.20    4.09
  -4  -6   6   94.51    3.64
  -4   6   6   93.63    3.97
   4  -6  -6  101.99    4.35
  -4   6   6   92.04    3.92
  -4  -6   6   99.42    3.98
   4  -6  -6   94.09    4.81
   4  -6  -5   98.06    4.12
   4  -6  -5   94.67    4.23
  -4   6   5   94.26    3.80
   4  -6  -5   93.64    4.66
   4  -6  -5   99.69    4.69
  -4  -6   5   97.47    4.11
  -4  -6   5   95.45    3.76
  -4  -6   5   95.65    3.48
  -4   6   5   99.76    3.96
   4  -6  -4  544.75   13.68
  -4  -6   4  529.92   11.70
   4  -6  -4  524.30   13.45
  -4  -6   4  513.99   12.77
  -4   6   4  503.96   12.16
   4  -6  -4  519.48   13.03
  -4   6   4  493.42   12.07
  -4   6   4  546.39   13.58
  -4  -6   4  520.38   12.09
   4   6  -3 1130.21   22.39
   4  -6  -3 1063.48   23.94
  -4  -6   3 1147.23   22.97
   4   6  -3 1062.99   23.23
  -4   6   3 1095.65   23.10
  -4   6   3 1098.50   24.22
  -4  -6   3 1102.21   22.35
   4  -6  -3 1122.83   24.31
  -4   6   3 1065.05   22.94
  -4  -6   2  185.44    5.32
   4   6  -2  177.28    5.01
   4   6  -2  166.59    5.32
  -4   6   2  171.90    5.97
   4  -6  -2  180.86    6.12
   4  -6  -2  179.28    5.92
   4  -6  -2  182.34    6.08
  -4   6   2  183.54    5.62
  -4  -6   2  178.87    4.89
  -4   6   2  171.34    5.39
   4   6  -1 1009.45   21.86
  -4   6   1 1091.47   22.55
  -4   6   1 1099.76   22.74
  -4  -6   1 1073.95   22.14
   4  -6  -1 1050.36   23.21
   4   6  -1 1025.44   22.59
   4   6  -1 1022.03   21.97
   4  -6  -1 1169.25   23.12
   4  -6  -1 1066.30   22.70
  -4   6   1 1050.32   22.96
  -4  -6   1 1076.66   21.66
  -4   6   0  102.15    3.99
   4  -6   0  102.08    3.92
   4   6   0   95.47    3.75
   4   6   0   95.77    3.41
  -4  -6   0   96.47    3.44
   4  -6   0  100.86    3.81
  -4   6   0  102.35    4.04
  -4  -6   0   99.46    3.74
  -4   6   0   99.98    4.02
  -4   6  -1 1314.50   27.36
   4  -6   1 1277.21   26.68
   4   6   1 1278.90   25.99
   4   6   1 1239.14   26.54
  -4  -6  -1 1346.99   26.97
   4  -6   1 1322.44   26.84
  -4   6  -1 1310.15   27.52
   4  -6   1 1309.32   27.63
   4  -6   2 1054.08   21.79
  -4   6  -2  947.82   22.30
  -4  -6  -2 1091.93   21.45
   4  -6   2 1043.48   22.72
  -4   6  -2 1010.22   22.50
   4   6   2  983.91   21.48
  -4  -6  -2 1017.57   22.18
   4   6   2 1038.76   20.94
  -4  -6  -3  418.68   10.73
   4   6   3  420.17    9.78
  -4   6  -3  421.01   11.39
   4  -6   3  420.31   10.38
   4   6   3  433.59   10.26
   4  -6   3  437.41   10.59
  -4  -6  -3  429.79   10.31
   4  -6   3  443.73   11.37
  -4  -6  -3  440.62   11.19
   4   6   4  113.41    3.97
   4   6   4  108.50    3.69
  -4  -6  -4  109.03    4.71
  -4  -6  -4  111.82    4.55
  -4   6  -4  100.73    4.72
  -4  -6  -4  111.90    4.19
   4  -6   4  119.90    4.32
   4  -6   4  114.24    4.20
   4  -6   4  111.95    4.70
  -4   6  -5  523.66   13.59
  -4  -6  -5  536.43   13.42
  -4  -6  -5  534.62   12.33
   4  -6   5  526.15   12.09
   4   6   5  504.63   11.46
   4  -6   5  492.50   12.78
   4   6   5  518.90   11.77
   4  -6   6    6.48    1.20
   4   6   6    7.53    1.18
   4   6   6    8.97    1.27
   4  -6   6    8.85    1.31
   4  -6   6    6.07    1.35
  -4  -6  -6    9.36    1.68
  -4  -6  -6    5.49    1.19
   4  -6   7 1432.82   30.98
   4   6   7 1449.84   30.68
   4  -6   7 1515.99   32.08
  -4  -6  -7 1525.51   31.66
   4   6   7 1508.46   30.80
   4  -6   7 1435.91   31.05
  -4  -6  -7 1523.25   33.11
   4  -6   8  102.24    5.00
  -4  -6  -8  108.67    4.90
   4   6   8  113.13    4.68
  -4  -6  -8  109.65    5.71
   4   6   8  106.90    4.53
  -4  -6  -9  470.11   12.66
  -4  -6  -9  412.94   13.55
   4   6   9  451.08   11.85
   4  -6   9  425.93   12.55
   4   6   9  436.60   11.94
   4  -6  10   32.42    2.90
   4   6  10   33.74    2.74
  -4  -6 -10   33.84    2.97
   4   6  10   29.89    2.68
   4   6  11 1428.71   31.00
   4   6  11 1405.30   31.17
  -4  -6 -11 1388.99   31.70
   4  -6  11 1364.07   31.61
   4   6  12   54.35    3.76
   4  -6  12   50.90    3.95
   4   6  12   54.74    3.94
  -4  -6 -12   50.89    3.93
  -4  -6 -13   12.15    2.24
   4   6  13   17.50    2.53
   4  -6  13   13.87    2.27
   4   6  13   20.24    2.55
  -4  -6 -14    0.96    1.50
   4   6  14    4.48    1.83
   4   6  14    3.77    1.66
  -4   8  13   25.11    2.92
  -4   8  13   24.87    2.88
   4  -8 -13   18.85    2.39
  -4   8  12    8.82    1.86
  -4  -8  12    9.13    1.79
   4  -8 -12    8.48    1.74
  -4   8  12    7.05    1.79
   4  -8 -12   12.27    2.29
   4  -8 -11  666.01   17.73
  -4   8  11  694.92   17.41
  -4  -8  11  664.25   17.20
  -4   8  11  669.30   17.39
   4  -8 -11  651.82   17.33
   4  -8 -10  122.24    5.82
   4  -8 -10  116.43    5.62
  -4   8  10  126.41    5.63
  -4   8  10  125.61    5.63
  -4  -8  10  129.81    5.70
  -4  -8   9    5.81    1.41
   4  -8  -9    6.85    1.67
  -4   8   9    4.63    1.36
  -4   8   9    6.02    1.43
   4  -8  -9    4.28    1.25
   4  -8  -8  129.00    5.67
   4  -8  -8  128.38    5.82
  -4  -8   8  123.67    5.48
  -4   8   8  136.92    5.46
  -4  -8   7 1101.16   24.57
  -4  -8   7 1037.88   23.21
  -4   8   7 1087.58   24.05
  -4   8   7 1079.17   23.86
   4  -8  -7 1099.15   25.12
  -4   8   6   48.68    3.02
  -4   8   6   49.87    2.99
   4  -8  -6   49.17    3.48
  -4  -8   6   49.64    3.32
  -4  -8   6   46.41    2.59
   4  -8  -5  117.13    5.37
  -4  -8   5  116.27    5.18
   4   8  -5  122.96    4.30
  -4   8   5  115.01    4.69
  -4   8   5  119.02    4.84
  -4  -8   5  112.85    4.26
  -4  -8   4  107.30    4.35
   4  -8  -4  107.95    5.21
   4   8  -4   99.31    4.78
  -4  -8   4  111.65    5.09
  -4   8   4  117.41    4.58
  -4   8   4  116.77    4.75
   4   8  -4  113.23    4.11
  -4  -8   4  106.14    3.96
   4  -8  -4  106.56    5.34
  -4   8   3  125.50    5.67
  -4  -8   3  125.52    4.32
  -4  -8   3  132.12    5.56
   4   8  -3  122.22    5.13
   4  -8  -3  134.70    5.72
  -4  -8   3  120.79    4.67
  -4   8   3  124.97    4.84
   4  -8  -3  118.60    5.46
  -4   8   3  122.91    5.04
   4   8  -3  126.74    4.52
  -4   8   2  575.33   15.16
   4   8  -2  594.36   13.88
  -4   8   2  604.10   14.66
  -4  -8   2  561.51   13.88
  -4  -8   2  579.33   13.42
   4   8  -2  574.01   14.26
  -4   8   2  610.73   14.42
   4  -8  -2  575.62   15.19
   4  -8  -2  591.99   15.02
  -4  -8   1  376.69   10.30
   4   8  -1  388.86   10.35
   4  -8  -1  394.83   10.89
  -4   8   1  391.27   10.60
  -4   8   1  415.47   11.40
  -4  -8   1  397.00    9.91
   4   8  -1  382.10   10.89
  -4   8   1  408.23   10.97
   4   8  -1  384.07   10.25
  -4   8   0    1.34    0.99
   4   8   0    1.55    0.73
   4  -8   0    3.45    1.36
  -4   8   0    1.31    0.98
   4   8   0    2.58    0.91
  -4  -8   0    4.16    0.96
   4  -8   0    0.43    0.85
  -4  -8   0    3.09    1.12
  -4   8   0    2.85    1.11
  -4  -8  -1  369.17   10.54
   4   8   1  381.31    9.74
   4   8   1  399.73   10.48
   4  -8   1  366.74   11.03
  -4   8  -1  396.16   10.67
   4  -8   1  365.04   10.01
  -4  -8  -1  372.37   10.09
  -4   8  -1  360.30   10.62
  -4   8  -1  384.16   11.05
  -4   8  -2  116.53    5.27
   4  -8   2  104.20    4.36
   4  -8   2  109.71    5.18
  -4   8  -2  113.56    4.81
  -4  -8  -2  109.38    4.96
   4   8   2  109.08    4.57
   4   8   2  110.34    4.14
  -4  -8  -3   26.23    2.51
   4  -8   3   25.89    2.61
   4   8   3   30.24    2.01
   4   8   3   24.30    2.11
   4  -8   3   25.42    2.07
  -4   8  -3   31.16    2.78
  -4  -8  -3   27.23    2.36
   4   8   4   64.42    3.35
  -4  -8  -4   60.97    3.97
  -4  -8  -4   67.53    3.81
   4   8   4   62.90    2.95
  -4   8  -4   65.70    4.16
   4  -8   4   70.21    4.21
  -4  -8  -5  355.15   10.98
  -4   8  -5  365.77   11.84
   4   8   5  374.66    9.53
   4   8   5  366.68    9.99
   4  -8   5  383.62   11.35
  -4  -8  -5  379.77   10.27
   4   8   6   81.70    3.85
  -4  -8  -6   91.56    4.26
   4   8   6   75.87    3.49
  -4   8  -6   77.65    4.92
   4  -8   6   81.75    4.63
  -4  -8  -7  423.16   11.74
   4  -8   7  433.90   12.81
   4   8   7  416.81   10.86
   4   8   7  418.35   11.21
   4   8   8    5.70    1.30
   4  -8   8    7.23    1.81
  -4  -8  -8    6.56    1.58
   4   8   9   23.21    2.23
   4  -8   9   25.74    2.95
   4   8   9   26.36    2.25
  -4  -8  -9   23.47    2.55
   4  -8  10   18.64    2.70
  -4  -8 -10   18.70    2.29
   4   8  10   20.49    2.22
   4   8  10   21.25    2.21
   4   8  11   74.17    4.34
   4  -8  11   80.59    5.28
  -4  -8 -11   81.36    4.95
   4   8  11   82.05    4.47
   4   8  12    3.69    1.56
   4  -8  12    1.66    1.28
  -4  -8 -12   -0.96    1.47
   4   8  12    0.78    1.23
  -4 -10   9    4.45    1.62
  -4  10   9    5.16    1.61
   4 -10  -9    5.10    1.86
  -4  10   9    5.66    1.67
  -4  10   8  332.09   10.37
  -4 -10   8  313.43   10.62
   4 -10  -8  307.91   10.88
  -4  10   8  306.84    9.91
  -4  10   7  215.25    7.57
   4 -10  -7  204.18    8.45
  -4  10   7  209.78    7.85
  -4 -10   7  205.05    8.29
  -4  10   6   82.02    4.39
  -4  10   6   87.33    4.73
   4 -10  -6   86.41    5.13
  -4 -10   6   80.09    4.83
  -4  10   5  104.01    4.92
  -4 -10   5  102.29    5.44
  -4  10   5  105.91    5.24
   4 -10  -5   99.13    5.58
   4 -10  -4  478.56   14.32
   4  10  -4  438.66   13.63
  -4 -10   4  461.64   13.93
  -4  10   4  511.93   13.72
  -4  10   4  517.04   13.40
   4  10  -3  218.35    7.39
  -4 -10   3  236.37    8.95
   4  10  -3  226.93    8.29
  -4  10   3  242.07    8.33
  -4 -10   3  208.91    7.00
  -4  10   3  246.97    8.07
  -4  10   2  219.00    7.95
   4 -10  -2  212.58    8.36
  -4  10   2  208.70    7.49
  -4 -10   2  205.10    8.20
  -4 -10   2  186.43    6.62
   4  10  -2  208.67    7.60
   4 -10  -1   24.72    2.82
   4  10  -1   29.47    2.61
  -4  10   1   29.83    2.75
  -4 -10   1   25.36    2.22
  -4 -10   1   26.33    2.87
  -4  10   1   28.18    2.81
  -4  10   0  144.45    6.17
  -4 -10   0  136.23    6.56
  -4  10   0  137.24    6.37
   4  10   0  143.32    6.30
  -4 -10   0  132.03    5.59
   4 -10   0  153.47    6.83
   4  10   0  130.81    5.54
   4 -10   1  245.38    9.37
   4  10   1  253.22    8.82
   4  10   1  261.60    8.10
  -4 -10  -1  229.07    8.24
  -4  10  -1  257.29    9.29
  -4  10  -1  259.97    9.12
   4  10   2    1.01    0.98
  -4  10  -2    2.02    1.54
   4 -10   2    3.08    1.68
  -4 -10  -2    0.44    0.97
   4  10   2    2.10    1.20
   4 -10   3   13.66    2.28
  -4  10  -3   19.32    2.62
   4  10   3   15.76    2.14
   4  10   3   14.28    1.69
  -4  10  -4  148.21    7.19
   4 -10   4  133.83    6.66
   4  10   4  139.73    5.89
   4  10   4  133.40    5.28
  -4  10  -5   66.49    4.96
   4  10   5   73.37    3.67
   4 -10   5   68.90    4.69
   4  10   5   73.68    4.14
   4  10   6   39.93    2.75
   4  10   6   41.89    3.14
   4 -10   6   34.83    3.41
   4  10   7   97.05    4.84
   4  10   7   93.45    4.33
   4 -10   7   87.21    5.54
   4  10   8  102.90    4.72
   4 -10   8  105.31    6.20
   4  10   8  106.19    5.19
  -5   1  17  325.95   12.63
  -5  -1  17  324.63   13.16
  -5   1  16   47.09    4.42
  -5  -1  16   40.77    4.38
  -5   1  16   42.17    4.32
  -5   1  15  137.83    7.24
  -5  -1  15  139.87    7.64
  -5   1  15  138.54    7.52
  -5  -1  14    7.59    1.95
  -5   1  14    8.85    1.98
  -5   1  14    6.54    2.23
  -5  -1  13  307.13   11.34
  -5   1  13  323.00   11.24
  -5   1  13  334.32   11.24
  -5   1  12    3.87    1.33
  -5  -1  12    6.03    1.80
  -5   1  12    6.42    1.58
  -5   1  11  152.25    6.48
  -5  -1  11  157.62    6.85
  -5   1  11  152.54    6.61
  -5   1  10  457.52   12.71
  -5   1  10  444.60   12.77
   5  -1 -10  469.22    9.01
   5  -1 -10  445.16    9.12
  -5  -1  10  445.43   13.03
  -5   1   9  859.32   20.69
   5  -1  -9  904.10   17.11
   5  -1  -9  899.77   17.33
  -5  -1   9  843.20   20.92
  -5   1   9  900.91   20.72
   5  -1  -8    7.34    0.49
  -5   1   8    6.00    1.16
  -5   1   8    4.31    1.02
   5  -1  -8    6.94    0.57
  -5  -1   8    3.92    1.11
   5  -1  -7  339.62    7.17
   5  -1  -7  342.88    9.58
  -5  -1   7  318.44    9.36
   5  -1  -7  341.22    6.92
  -5   1   7  339.00    9.28
  -5   1   7  340.03    9.18
  -5   1   6 1103.14   23.31
   5  -1  -6 1132.88   21.21
   5  -1  -6 1135.61   23.81
  -5   1   6 1083.23   23.44
   5  -1  -5 1139.63   20.37
  -5   1   5 1026.85   21.93
   5  -1  -5 1101.41   22.40
  -5   1   5 1076.69   22.14
   5  -1  -5 1031.86   21.47
  -5   1   4 1334.83   26.19
   5  -1  -4 1377.18   25.90
   5  -1  -4 1331.29   26.42
  -5  -1   4 1329.31   24.94
   5  -1  -4 1368.22   25.02
  -5   1   4 1280.53   26.24
   5  -1  -4 1315.30   26.48
   5  -1  -3 2417.15   48.75
   5  -1  -3 2473.14   49.24
  -5   1   3 2598.88   49.13
   5  -1  -3 2591.24   49.36
  -5   1   3 2586.04   49.16
  -5   1   2 1128.93   21.90
  -5  -1   2 1130.13   21.94
   5  -1  -2 1121.14   22.01
  -5   1   2 1132.92   21.83
   5  -1  -2 1165.10   22.11
  -5   1   2 1129.22   21.71
  -5  -1   1 1404.24   26.59
  -5   1   1 1340.79   26.03
   5  -1  -1 1329.89   25.96
   5  -1  -1 1259.17   26.07
  -5   1   1 1399.79   25.90
   5  -1  -1 1454.29   26.39
  -5   1   1 1362.20   26.20
   5   1   0   91.03    2.88
   5  -1   0   90.92    2.24
  -5   1   0   85.67    2.57
  -5  -1   0   83.02    2.80
   5  -1   0   84.66    2.65
  -5   1   0   87.16    2.23
   5  -1   0   83.49    2.35
  -5   1   0   86.21    2.43
  -5   1  -2   46.00    1.89
   5  -1   2   48.46    2.04
   5   1   2   43.12    1.56
  -5   1  -2   43.04    1.76
  -5  -1  -2   43.27    1.58
   5  -1   2   42.50    1.65
  -5  -1  -2   38.87    1.98
   5   1   2   44.35    2.09
  -5  -1  -3  549.90   12.28
  -5   1  -3  551.46   11.82
   5   1   3  515.93   12.13
   5  -1   3  526.17   11.57
   5  -1   3  572.00   12.19
   5   1   3  551.30   11.58
  -5  -1  -4 2057.59   39.58
   5  -1   4 1927.60   38.87
  -5   1  -4 2055.23   39.02
   5  -1   4 1943.88   39.26
   5   1   4 2024.87   39.51
   5   1   4 1975.59   39.01
  -5  -1  -5  626.81   14.12
   5  -1   5  587.01   13.83
   5  -1   5  667.58   13.94
   5   1   5  569.77   13.74
   5   1   5  619.42   14.04
  -5   1  -5  638.05   13.64
  -5  -1  -6  149.81    4.97
   5  -1   6  139.99    4.78
   5   1   6  143.10    4.90
   5   1   6  132.99    4.87
  -5   1  -6  144.08    4.54
  -5  -1  -7  492.51   11.92
  -5   1  -7  480.24   11.26
   5  -1   7  471.86   11.78
   5   1   7  472.06   12.11
   5  -1   8    1.49    0.79
  -5  -1  -8    2.77    0.89
  -5   1  -8    1.50    0.66
   5   1   8    2.85    1.01
  -5  -1  -9 1716.52   34.61
  -5   1  -9 1668.74   33.65
   5  -1   9 1630.14   34.41
   5   1   9 1621.16   35.44
   5  -1  10  157.03    5.76
   5  -1  10  157.80    6.82
  -5   1 -10  156.96    5.17
   5   1  10  146.95    6.37
  -5  -1 -10  148.74    5.61
  -5   1 -11  224.53    6.64
   5   1  11  220.78    8.43
   5  -1  11  214.74    7.31
   5  -1  11  213.85    8.63
  -5  -1 -11  228.70    7.32
   5  -1  12   25.43    2.26
  -5  -1 -12   25.05    2.18
   5   1  12   23.84    2.86
  -5   1 -12   28.48    2.06
   5  -1  12   28.77    3.22
   5  -1  13  473.83   12.54
  -5   1 -13  443.76   11.31
   5  -1  13  456.28   14.74
   5   1  13  467.34   14.42
  -5  -1 -13  445.17   12.08
  -5  -1 -14   35.98    2.60
   5   1  14   29.77    3.37
   5  -1  14   31.90    3.74
  -5   1 -14   30.08    2.14
   5   1  15   23.11    3.17
   5  -1  15   27.07    3.58
   5  -1  16    3.38    2.20
   5   1  16    2.02    1.90
  -5   3  17  203.38    9.58
  -5  -3  17  208.60   10.67
  -5   3  17  211.26    9.75
   5  -3 -17  201.70    8.87
  -5   3  16   24.10    3.34
  -5   3  16   19.48    2.91
  -5  -3  16   25.43    3.78
   5  -3 -16   19.82    2.74
   5  -3 -15    3.07    1.55
  -5   3  15    2.08    1.57
  -5   3  15    2.57    1.65
  -5  -3  15    3.36    2.15
   5  -3 -14   38.80    3.34
  -5  -3  14   33.55    3.76
   5  -3 -14   39.47    2.11
  -5   3  14   37.29    3.56
   5  -3 -14   39.83    1.86
  -5   3  14   40.51    3.78
  -5   3  13  237.88    9.07
   5  -3 -13  226.56    6.53
   5  -3 -13  228.08    8.41
  -5   3  13  214.73    8.67
  -5  -3  13  245.80   10.08
   5  -3 -13  233.09    6.00
  -5  -3  12   28.79    1.22
  -5   3  12   27.76    2.85
  -5   3  12   31.79    3.09
   5  -3 -12   26.71    1.62
   5  -3 -12   27.73    1.94
   5  -3 -12   25.41    2.50
  -5   3  11  567.02   15.24
   5  -3 -11  577.45   13.39
   5  -3 -11  555.58   16.35
   5  -3 -11  570.74   14.82
  -5   3  11  531.47   15.10
   5  -3 -11  566.50   12.58
  -5  -3  11  591.06   12.05
  -5  -3  10  793.03   16.70
   5  -3 -10  848.65   19.40
   5  -3 -10  877.85   21.15
  -5   3  10  843.58   19.75
  -5   3  10  828.29   19.79
  -5   3   9  375.84   10.81
   5  -3  -9  381.29   11.62
  -5  -3   9  385.83    8.62
   5  -3  -9  405.72   10.66
  -5   3   9  368.07   10.67
   5  -3  -8    3.96    1.00
  -5  -3   8    4.87    0.57
   5  -3  -8    5.47    1.28
  -5   3   8    4.09    1.06
  -5   3   8    4.22    1.09
   5  -3  -7  861.93   18.06
  -5   3   7  866.91   19.34
   5  -3  -7  857.33   19.05
   5  -3  -7  848.33   20.16
  -5   3   7  877.39   19.47
  -5  -3   7  883.29   17.58
  -5   3   6 6057.23  117.06
   5  -3  -6 6270.14  118.03
   5  -3  -6 6190.01  118.04
  -5   3   6 6067.48  117.13
   5  -3  -6 6246.80  116.94
   5  -3  -5 3841.77   74.11
  -5   3   5 3902.23   74.65
   5  -3  -5 3803.14   74.54
   5  -3  -5 3885.24   75.45
  -5  -3   5 3921.77   74.24
  -5   3   5 3888.52   74.71
   5  -3  -5 4067.45   75.50
   5  -3  -4  632.40   13.69
   5  -3  -4  610.10   13.65
  -5   3   4  608.47   13.02
  -5   3   4  594.43   12.95
  -5   3   4  629.24   13.53
   5  -3  -4  611.94   12.90
  -5  -3   4  628.45   12.59
   5  -3  -3 1613.60   30.39
  -5   3   3 1405.37   30.00
  -5  -3   3 1487.99   29.03
   5  -3  -3 1542.54   30.26
  -5   3   3 1503.91   29.61
  -5   3   3 1466.72   29.63
   5  -3  -3 1529.11   29.81
   5  -3  -3 1530.35   29.84
  -5   3   2 1740.71   34.07
  -5  -3   2 1738.78   33.28
  -5   3   2 1748.47   34.03
   5  -3  -2 1676.02   34.33
   5  -3  -2 1695.52   34.44
  -5  -3   2 1686.59   33.65
  -5   3   1  226.24    5.57
  -5  -3   1  234.29    4.86
   5  -3  -1  226.03    5.92
  -5  -3   1  233.84    5.26
   5  -3  -1  222.45    5.72
  -5   3   1  225.47    5.63
   5  -3  -1  212.37    5.72
   5   3  -1  223.73    4.95
  -5   3   1  224.12    5.95
   5   3  -1  225.74    5.39
   5   3   0  102.54    2.44
   5   3   0   96.26    2.76
  -5  -3   0   97.05    2.55
  -5  -3   0   96.11    2.43
   5  -3   0   96.33    3.04
  -5   3   0   87.65    3.03
  -5   3   0  100.38    3.36
   5  -3   0   91.76    3.28
  -5   3   0   98.26    3.22
   5  -3   0  104.40    3.17
  -5   3  -1 1623.68   31.15
  -5  -3  -1 1632.28   30.53
   5  -3   1 1516.92   31.23
   5   3   1 1576.79   29.90
   5   3   1 1649.92   30.34
  -5  -3  -1 1559.54   30.23
   5  -3   1 1588.58   30.87
   5  -3   1 1563.16   30.77
   5  -3   2 1222.89   23.61
  -5   3  -2 1172.39   24.17
  -5   3  -2 1152.52   23.97
   5   3   2 1182.92   23.11
   5  -3   2 1162.72   23.65
  -5  -3  -2 1147.00   23.50
   5  -3   2 1205.33   24.22
   5  -3   3 1479.09   29.46
  -5   3  -3 1533.28   30.12
   5  -3   3 1525.91   29.38
   5   3   3 1441.64   28.95
   5   3   3 1488.92   29.08
  -5   3  -3 1509.95   29.70
  -5  -3  -3 1533.91   29.67
   5  -3   3 1456.58   29.96
   5  -3   4 1666.41   33.93
   5   3   4 1674.29   33.98
  -5   3  -4 1744.31   34.25
  -5   3  -4 1732.86   34.86
   5  -3   4 1722.40   34.19
   5   3   4 1665.78   33.81
  -5  -3  -4 1711.94   34.54
   5  -3   4 1640.25   34.52
  -5   3  -5 4015.92   74.60
   5   3   5 3900.78   74.54
   5   3   5 3879.73   74.70
  -5  -3  -5 3928.71   75.31
   5  -3   5 3688.59   74.94
  -5  -3  -5 3961.10   75.93
   5  -3   5 3868.24   74.69
   5   3   6  949.95   20.79
   5   3   6  996.10   21.13
  -5  -3  -6  992.22   21.94
  -5   3  -6  974.20   20.51
   5  -3   6  989.31   20.92
   5  -3   6  960.56   21.18
  -5  -3  -6  958.68   21.51
   5  -3   7  209.48    6.77
  -5  -3  -7  223.21    7.37
   5   3   7  211.92    6.81
   5  -3   7  227.11    6.84
  -5  -3  -7  221.08    7.45
   5   3   7  215.93    6.77
  -5   3  -7  215.50    6.23
   5   3   8    5.64    1.26
  -5  -3  -8    1.96    1.03
   5  -3   8    2.80    0.95
   5  -3   8    2.89    0.98
  -5  -3  -8    2.89    1.07
  -5   3  -8    3.71    0.89
   5   3   8    1.42    0.89
  -5   3  -9  268.58    7.45
   5  -3   9  277.08    8.40
   5  -3   9  269.62    8.32
   5   3   9  261.69    8.54
  -5  -3  -9  268.48    8.70
   5   3   9  256.07    8.40
   5   3  10    1.70    1.24
   5  -3  10    1.16    0.88
  -5  -3 -10    2.48    0.97
   5   3  10    2.01    1.05
   5  -3  10    2.14    1.04
  -5   3 -10    1.78    0.75
  -5  -3 -11   41.92    3.14
   5   3  11   38.42    3.24
  -5   3 -11   39.44    2.41
   5  -3  11   43.22    3.07
   5   3  11   43.37    3.35
   5   3  12    4.35    1.66
  -5  -3 -12    2.74    1.19
   5  -3  12    2.90    1.27
   5   3  12    1.73    1.18
  -5   3 -12    2.89    0.88
  -5   3 -13  714.05   16.70
  -5  -3 -13  686.67   18.34
   5  -3  13  721.61   18.22
  -5  -3 -14   50.60    3.63
   5  -3  14   50.31    4.78
   5  -3  14   51.20    3.50
   5   3  14   49.99    4.28
   5   3  14   48.64    4.16
   5  -3  15  311.13   12.98
   5   3  15  331.85   12.19
   5   3  15  313.53   11.72
   5  -3  16  438.56   16.46
   5   3  16  457.05   15.46
   5   3  16  443.35   15.01
  -5  -5  16   56.70    5.68
  -5   5  16   56.51    4.63
  -5   5  15   14.96    2.58
   5  -5 -15   12.96    2.38
  -5   5  14   74.15    4.86
   5  -5 -14   73.93    4.77
   5  -5 -14   64.11    3.30
  -5   5  14   69.31    4.67
  -5   5  13   65.69    4.35
   5  -5 -13   71.96    4.47
  -5   5  13   64.30    4.37
   5  -5 -13   58.68    3.78
   5  -5 -13   60.62    3.20
  -5  -5  13   63.57    3.03
  -5   5  12  176.80    7.07
   5  -5 -12  168.41    6.96
  -5  -5  12  167.66    5.51
   5  -5 -12  163.57    5.70
  -5   5  12  163.34    6.94
   5  -5 -11  239.92    7.28
   5  -5 -11  243.88    8.49
  -5  -5  11  250.36    7.16
  -5   5  11  248.15    8.54
  -5   5  11  246.05    8.58
   5  -5 -10   94.47    4.67
   5  -5 -10  100.14    4.14
  -5  -5  10   90.15    4.41
  -5   5  10  103.52    4.86
  -5  -5  10   98.49    3.89
  -5   5   9  628.65   15.69
   5  -5  -9  655.63   15.85
  -5  -5   9  630.74   15.32
  -5   5   9  666.81   15.96
   5  -5  -9  618.99   17.52
  -5  -5   9  633.35   14.48
   5  -5  -9  620.67   14.82
  -5  -5   8    1.81    0.87
  -5   5   8    0.09    0.84
  -5   5   8    1.20    1.03
   5  -5  -8    0.12    0.99
   5  -5  -8    0.98    0.75
  -5  -5   8    0.34    0.63
  -5   5   7  883.18   19.75
  -5  -5   7  904.53   19.29
   5  -5  -7  874.40   19.84
   5  -5  -7  893.79   21.20
   5  -5  -7  869.51   19.50
  -5  -5   7  903.41   19.12
   5  -5  -7  898.11   21.47
  -5   5   7  865.78   19.72
  -5  -5   6 1923.12   37.15
  -5  -5   6 1811.95   36.66
  -5   5   6 1775.52   37.19
   5  -5  -6 1909.32   38.98
  -5   5   6 1825.33   37.25
   5  -5  -6 1813.83   37.35
  -5  -5   6 1854.68   37.08
   5  -5  -6 1856.15   38.95
   5  -5  -6 1872.49   37.49
   5  -5  -5   13.90    1.52
  -5  -5   5   11.80    1.35
   5  -5  -5   15.00    1.82
  -5  -5   5   13.62    1.33
  -5  -5   5   13.38    1.14
   5  -5  -5   14.01    1.72
   5  -5  -5   12.23    1.43
  -5   5   5   12.37    1.33
  -5   5   5   13.61    1.39
  -5  -5   4    2.35    0.58
  -5   5   4    0.15    0.67
  -5  -5   4    1.60    0.68
   5  -5  -4    1.96    0.86
   5  -5  -4    0.56    0.63
   5  -5  -4    1.02    0.76
  -5   5   4    2.72    0.83
  -5   5   4    1.72    0.78
  -5  -5   3    5.67    0.83
  -5   5   3    3.00    0.80
   5  -5  -3    4.63    1.02
   5  -5  -3    4.42    1.04
   5  -5  -3    4.91    0.93
   5   5  -3    3.86    0.72
   5   5  -3    4.61    0.59
  -5   5   3    3.53    0.84
  -5   5   3    5.95    0.96
  -5  -5   3    4.77    0.71
   5   5  -2 5262.24   95.54
   5  -5  -2 5294.95   96.74
  -5   5   2 4809.38   96.44
  -5   5   2 5527.96   96.14
   5  -5  -2 4673.04   96.29
   5  -5  -2 4595.15   96.27
  -5  -5   2 5067.09   95.46
   5  -5  -1  200.01    6.22
   5   5  -1  191.85    5.22
  -5   5   1  206.41    5.85
  -5   5   1  209.48    6.14
  -5  -5   1  206.46    5.06
   5   5  -1  194.02    5.74
   5   5  -1  199.73    5.24
  -5   5   1  216.81    6.02
   5  -5  -1  208.11    6.04
   5  -5  -1  207.59    6.00
  -5  -5   1  207.58    5.48
   5   5   0   35.62    1.94
  -5   5   0   37.24    2.17
   5  -5   0   38.47    2.08
   5  -5   0   35.33    2.26
   5   5   0   36.34    1.66
   5  -5   0   34.26    2.01
  -5  -5   0   34.48    1.86
  -5  -5   0   34.65    1.64
  -5   5   0   36.28    2.16
   5  -5   1  156.51    4.72
  -5   5  -1  143.55    4.97
   5   5   1  154.58    4.05
  -5  -5  -1  151.40    4.59
   5  -5   1  151.13    4.66
  -5  -5  -1  146.61    4.28
   5   5   1  142.43    4.41
  -5   5  -1  133.81    4.84
  -5  -5  -1  144.48    4.15
   5  -5   1  142.86    5.10
  -5  -5  -2 1894.52   38.04
   5  -5   2 2008.04   39.30
   5  -5   2 2014.89   38.44
  -5  -5  -2 1916.53   37.89
  -5   5  -2 1908.73   39.10
  -5   5  -2 1771.96   38.88
   5  -5   2 1880.88   38.23
   5   5   2 1816.28   37.74
  -5  -5  -2 2031.38   38.58
   5   5   2 2055.90   37.44
  -5   5  -3    1.16    0.79
  -5  -5  -3    1.11    0.59
  -5  -5  -3    0.62    0.74
   5   5   3    0.77    0.53
   5   5   3    1.14    0.48
   5  -5   3    1.24    0.57
  -5   5  -3   -0.05    0.80
   5  -5   3    0.74    0.57
   5  -5   3    0.93    0.82
   5  -5   4   66.97    2.98
   5  -5   4   69.86    3.42
  -5   5  -4   69.00    3.58
  -5   5  -4   64.40    3.27
  -5  -5  -4   63.27    2.93
   5   5   4   66.46    2.59
   5   5   4   62.20    2.68
  -5  -5  -4   65.49    3.25
  -5  -5  -5 1492.74   31.89
  -5  -5  -5 1482.66   31.11
  -5   5  -5 1512.41   32.33
   5  -5   5 1492.55   31.73
  -5   5  -5 1553.75   31.61
   5  -5   5 1505.79   30.92
   5   5   5 1524.19   30.50
   5   5   5 1513.08   30.42
   5  -5   5 1513.93   30.90
  -5  -5  -6  872.58   20.15
   5  -5   6  942.13   20.07
   5   5   6  899.24   19.60
   5  -5   6  898.80   20.59
   5   5   6  902.50   19.71
  -5  -5  -6  912.08   21.17
   5  -5   6  953.65   20.14
  -5   5  -6  899.12   20.33
   5   5   7    1.93    0.96
   5  -5   7    3.86    1.17
  -5   5  -7    2.30    0.97
   5  -5   7    1.62    0.91
   5  -5   7    1.60    0.78
  -5  -5  -7    0.64    0.92
   5   5   7    1.20    0.93
  -5  -5  -8  218.59    8.13
  -5  -5  -8  225.16    8.38
   5   5   8  210.03    7.07
   5  -5   8  228.65    7.69
   5  -5   8  215.21    7.13
  -5   5  -8  221.47    7.08
   5   5   8  223.58    6.99
   5  -5   8  210.75    6.97
   5   5   9   66.58    3.60
   5   5   9   62.99    3.67
  -5   5  -9   71.57    3.67
   5  -5   9   71.65    4.09
  -5  -5  -9   68.56    4.43
  -5  -5  -9   72.65    4.56
   5   5  10   27.72    2.48
  -5  -5 -10   23.36    2.78
   5   5  10   26.65    2.47
  -5   5 -10   28.34    2.35
   5  -5  10   31.80    2.82
  -5   5 -11    2.28    1.07
   5  -5  11    2.84    1.28
  -5  -5 -11    1.77    1.41
   5   5  11    0.74    1.10
   5   5  11    0.69    1.34
   5   5  12  269.21    9.09
   5   5  12  247.76    9.10
  -5   5 -12  242.90    8.06
   5  -5  12  263.02    9.31
   5   5  13   -0.98    1.53
   5  -5  13    0.73    1.18
   5   5  13    0.42    1.19
   5  -5  14   11.29    2.02
   5   5  14   12.04    2.11
   5   5  14   14.54    2.35
   5   5  15   55.17    4.34
   5   5  15   56.91    4.48
   5  -7 -14  566.04   16.22
   5  -7 -14  508.11   14.07
  -5   7  14  552.93   15.77
  -5   7  14  559.71   15.87
   5  -7 -13   22.12    2.39
  -5   7  13   28.54    3.05
   5  -7 -13   25.99    2.95
  -5   7  13   25.96    2.98
  -5   7  12  108.63    5.45
  -5  -7  12  105.38    4.86
   5  -7 -12  104.17    5.58
  -5   7  12  116.22    5.68
   5  -7 -12  108.90    5.06
   5  -7 -11    5.44    1.42
  -5  -7  11    9.88    1.61
   5  -7 -11    7.06    1.81
  -5   7  11    7.65    1.92
   5  -7 -10  830.21   20.32
  -5   7  10  900.77   20.75
  -5  -7  10  864.07   20.13
   5  -7 -10  859.29   20.94
  -5   7  10  877.14   20.66
  -5   7   9  249.08    8.06
  -5  -7   9  227.80    7.47
   5  -7  -9  232.33    8.13
  -5   7   9  250.48    8.04
  -5  -7   9  242.91    7.79
   5  -7  -9  247.79    8.25
   5  -7  -8   54.52    3.51
  -5  -7   8   55.78    3.09
  -5   7   8   61.02    3.47
  -5  -7   8   58.81    3.30
  -5   7   8   55.53    3.35
   5  -7  -8   61.59    3.66
  -5   7   7    2.24    1.06
  -5  -7   7    4.65    1.20
   5  -7  -7    5.65    1.39
  -5   7   7    4.12    1.19
  -5  -7   7    1.90    0.84
   5  -7  -7    1.98    1.01
  -5   7   6   72.81    3.58
  -5  -7   6   74.88    3.55
   5  -7  -6   67.34    4.39
  -5   7   6   84.86    3.84
  -5  -7   6   79.68    3.88
   5  -7  -6   73.17    3.91
  -5  -7   6   81.85    3.33
  -5  -7   5   32.01    2.45
   5   7  -5   31.22    1.81
   5  -7  -5   28.58    2.72
  -5  -7   5   31.75    2.14
  -5   7   5   30.67    2.24
  -5   7   5   28.26    2.15
   5  -7  -5   29.99    2.78
   5  -7  -5   28.85    2.48
  -5  -7   5   30.69    1.88
  -5   7   4  280.95    7.96
   5  -7  -4  271.72    8.96
   5  -7  -4  277.11    9.16
  -5   7   4  281.03    9.09
   5   7  -4  290.09    7.19
  -5  -7   4  295.13    8.63
  -5  -7   4  274.01    7.70
  -5  -7   4  277.48    7.19
  -5   7   4  276.75    7.96
   5  -7  -4  269.51    8.64
   5  -7  -3    4.27    1.31
   5   7  -3    4.32    0.98
  -5  -7   3    3.68    0.75
  -5   7   3    3.75    1.00
  -5  -7   3    2.45    0.81
   5  -7  -3    5.27    1.24
   5   7  -3    3.49    0.80
  -5   7   3    3.82    1.06
  -5   7   2 2027.69   41.77
   5   7  -2 2020.28   40.05
   5  -7  -2 2001.38   41.78
   5   7  -2 1936.50   40.49
  -5  -7   2 2026.41   40.36
   5  -7  -2 2059.07   41.81
   5  -7  -2 2012.70   41.61
  -5   7   2 2067.80   41.09
  -5   7   2 2081.88   40.87
  -5   7   1    0.39    0.83
  -5   7   1    3.87    0.99
  -5  -7   1   -0.46    0.64
   5  -7  -1    1.35    0.88
  -5  -7   1   -0.06    0.72
   5  -7  -1    0.41    1.11
  -5   7   1    1.99    1.11
   5   7  -1    1.91    0.73
   5   7  -1   -0.49    1.06
   5  -7  -1    1.27    0.97
  -5   7   0   56.43    3.15
   5   7   0   63.33    2.78
  -5   7   0   53.68    3.13
   5  -7   0   58.52    3.45
   5  -7   0   60.17    3.08
  -5  -7   0   53.16    2.87
   5   7   0   60.43    3.10
   5  -7   0   57.47    3.13
  -5  -7   0   62.97    2.79
  -5   7   0   57.30    3.20
  -5   7  -1  293.87    8.33
   5  -7   1  275.43    7.90
  -5   7  -1  274.09    8.37
   5  -7   1  273.77    8.62
  -5   7  -1  290.26    8.66
  -5  -7  -1  276.55    8.06
   5   7   1  277.21    7.21
   5  -7   1  274.52    7.83
  -5  -7  -1  259.84    7.48
   5   7   1  274.17    7.81
   5  -7   2  739.44   17.80
  -5   7  -2  778.84   17.80
  -5  -7  -2  759.77   17.26
   5   7   2  771.68   15.84
  -5  -7  -2  732.29   16.63
   5  -7   2  783.22   16.83
   5   7   2  756.66   16.58
   5  -7   2  719.50   16.46
  -5   7  -3   11.73    1.81
   5  -7   3    9.33    1.59
   5  -7   3    9.19    1.27
  -5  -7  -3    8.12    1.40
  -5  -7  -3    9.55    1.28
   5   7   3    9.03    1.20
  -5  -7  -3   11.14    1.36
   5  -7   3    9.21    1.27
  -5   7  -4   16.60    2.09
   5  -7   4   17.95    1.68
   5  -7   4   16.35    1.94
  -5  -7  -4   16.80    1.62
   5   7   4   18.31    1.44
   5  -7   4   14.11    1.61
  -5  -7  -4   15.02    1.70
   5   7   4   14.16    1.46
  -5  -7  -4   15.16    1.77
  -5  -7  -5    2.58    1.28
   5   7   5    0.76    0.71
  -5   7  -5    1.87    1.01
   5   7   5    2.23    0.82
   5  -7   5    0.58    0.94
  -5  -7  -5    1.82    1.00
   5  -7   5    1.00    0.85
   5  -7   6  116.42    5.37
  -5  -7  -6  103.94    5.41
  -5   7  -6   94.58    5.38
  -5  -7  -6  110.52    4.65
   5   7   6  108.53    4.09
   5   7   6  110.67    4.30
  -5  -7  -7    0.34    1.11
  -5  -7  -7    0.37    0.94
   5   7   7    1.20    0.91
   5  -7   7    1.93    1.34
   5   7   7    0.68    0.73
   5  -7   8  268.58    9.36
  -5  -7  -8  283.46    8.93
   5   7   8  263.18    8.02
   5   7   8  270.11    8.18
  -5  -7  -9  112.21    5.36
   5   7   9  104.24    4.68
   5  -7   9  109.01    5.70
   5   7   9  110.65    4.80
   5  -7  10  196.42    8.31
   5   7  10  210.44    7.33
   5   7  10  215.64    7.47
  -5  -7 -10  202.29    7.88
  -5  -7 -11   -0.15    1.52
   5  -7  11   -2.21    1.65
   5   7  11    1.15    1.36
   5   7  11    0.94    1.26
   5   7  12  125.77    5.92
  -5  -7 -12  120.12    6.30
   5   7  12  125.12    5.84
   5  -7  12  130.18    6.70
   5   7  13   87.75    5.06
  -5  -7 -13   81.98    5.31
   5   7  13   84.99    4.90
   5  -7  13   75.37    5.20
  -5   9  11  112.86    5.52
  -5  -9  11  105.07    5.41
   5  -9 -11  104.36    5.51
  -5  -9  10  318.68   10.53
  -5   9  10  347.16   10.75
   5  -9 -10  324.17   10.83
  -5  -9   9    9.77    1.83
  -5   9   9   10.45    1.96
   5  -9  -9   10.55    2.05
  -5   9   9   10.43    1.83
  -5   9   8   21.91    2.35
   5  -9  -8   17.78    2.44
  -5  -9   8   16.13    2.13
  -5   9   8   16.55    2.07
  -5   9   7   47.04    3.24
  -5   9   7   52.11    3.48
   5  -9  -7   45.96    3.56
  -5  -9   7   46.78    3.42
  -5   9   6  551.67   13.95
   5   9  -6  527.79   12.51
   5  -9  -6  549.34   14.92
   5  -9  -5  312.37   10.40
  -5   9   5  333.00    9.81
  -5  -9   5  328.97   10.30
  -5  -9   5  294.28    8.45
  -5   9   5  320.54    9.44
   5   9  -5  330.54    8.73
  -5   9   4    2.52    1.29
   5  -9  -4    0.39    1.07
  -5   9   4    3.06    1.28
  -5  -9   4   -0.30    1.27
  -5  -9   4    1.44    0.79
   5   9  -4    0.21    0.76
  -5  -9   3   56.04    2.87
   5   9  -3   57.73    3.53
  -5  -9   3   55.69    3.78
   5   9  -3   51.83    2.91
  -5   9   3   59.67    3.52
  -5   9   3   56.89    3.53
  -5   9   2  277.89    8.67
  -5  -9   2  263.20    7.65
  -5   9   2  280.92    8.89
   5   9  -2  265.91    8.44
  -5  -9   2  268.98    9.22
   5  -9  -2  274.51    9.37
  -5   9   1    2.39    1.13
  -5   9   1    1.29    1.12
   5   9  -1    2.94    1.08
   5   9  -1    1.78    1.21
  -5  -9   1    4.94    1.08
   5  -9  -1    4.66    1.62
   5   9   0   56.70    3.58
  -5   9   0   58.48    3.62
  -5   9   0   60.39    3.81
   5   9   0   57.76    3.19
   5  -9   0   59.69    3.96
  -5   9  -1   33.50    2.96
   5   9   1   35.44    2.41
  -5  -9  -1   32.06    2.47
  -5   9  -1   31.42    2.79
   5   9   1   37.86    2.83
   5  -9   1   32.63    3.07
   5   9   2  428.40   10.89
  -5   9  -2  438.82   12.68
   5   9   2  444.98   11.78
  -5  -9  -2  397.53   11.56
   5  -9   2  412.06   12.67
   5   9   3   54.06    3.31
  -5   9  -3   53.50    3.88
   5  -9   3   46.99    3.62
  -5  -9  -3   47.66    3.30
   5   9   3   55.01    2.92
   5  -9   4   87.90    4.95
  -5  -9  -4   79.91    4.48
  -5   9  -4   87.07    5.24
   5   9   4   85.14    3.70
   5   9   4   86.99    4.23
  -5   9  -5  440.63   13.94
   5   9   5  432.34   10.97
   5  -9   5  439.73   13.23
   5   9   5  432.19   11.71
   5  -9   6  262.59    9.58
   5   9   6  255.10    8.12
  -5   9  -6  249.84   10.17
  -5  -9  -6  256.41    8.37
   5   9   6  255.15    7.56
  -5  -9  -7   19.41    2.25
   5  -9   7   13.38    2.29
   5   9   7   15.17    1.92
   5   9   7   20.63    1.98
  -5  -9  -8  346.92   10.63
   5   9   8  327.69    9.92
   5  -9   8  344.00   11.80
   5   9   8  335.13    9.55
  -5  -9  -9   52.65    3.72
   5  -9   9   46.65    4.05
   5   9   9   49.11    3.31
   5   9   9   49.52    3.21
   5   9  10   95.04    4.65
   5  -9  10   90.28    5.85
  -5  -9 -10   96.32    5.34
   5   9  10  101.13    4.97
  -5 -11   6  166.83    7.53
  -5  11   6  166.92    7.24
   5 -11  -6  168.90    7.83
  -5  11   6  173.73    7.06
  -5 -11   5   32.55    3.30
   5 -11  -5   36.18    3.66
  -5  11   5   38.53    3.47
  -5  11   5   28.92    2.88
  -5  11   4   76.19    4.71
  -5 -11   4   70.22    4.75
   5 -11  -4   68.80    4.87
  -5  11   4   72.63    4.38
   5  11  -3   69.72    4.47
  -5  11   3   77.31    4.73
   5 -11  -3   63.73    4.73
  -5  11   3   66.41    4.22
  -5 -11   3   72.44    4.87
   5  11  -2    2.75    1.41
  -5  11   2    1.67    1.35
  -5 -11   2    1.51    1.42
   5 -11  -2    3.61    1.90
  -5  11   2    2.57    1.52
  -5  11   1    1.46    1.28
   5 -11  -1    1.45    1.66
   5  11  -1    4.86    1.48
  -5  11   1    1.48    1.31
  -5 -11   1    0.54    1.42
  -5  11   0   18.67    2.56
   5  11   0   19.99    2.30
  -5 -11   0   14.25    2.47
   5 -11   0   16.99    2.75
  -5  11   0   14.71    2.45
  -5 -11  -1  160.16    7.72
   5  11   1  179.39    7.46
   5  11   1  176.76    6.68
  -5  11  -1  170.95    7.66
   5 -11   1  172.50    7.96
   5  11   2  147.47    5.82
  -5  11  -2  138.59    6.97
   5  11   2  141.74    6.51
   5 -11   2  131.13    6.91
  -5  11  -3   50.97    4.36
   5 -11   3   58.20    4.53
   5  11   3   63.60    4.15
   5  11   3   57.07    3.47
  -5  11  -4   91.39    6.04
   5  11   4  105.86    5.37
   5 -11   4   94.36    5.90
   5  11   4  101.14    4.67
   5  11   5  241.36    7.91
   5  11   5  243.10    8.77
   5 -11   5  245.25   10.03
  -5  11  -5  253.62   10.67
  -6   0  17   -0.49    1.64
  -6   0  17   -0.12    1.99
  -6   0  16  423.25   14.57
  -6   0  16  396.72   14.48
  -6   0  15   -0.60    1.79
  -6   0  15   -0.90    1.86
  -6   0  14   22.48    2.98
  -6   0  14   21.42    2.96
  -6   0  13   -0.13    1.21
  -6   0  12  395.39   12.55
  -6   0  11   -0.02    1.32
  -6   0  10  153.14    6.38
  -6   0   9   -0.05    0.76
  -6   0   8  114.30    4.87
  -6   0   7    0.74    0.82
  -6   0   5    1.93    0.78
  -6   0   5    0.28    0.53
  -6   0   4 3411.37   66.31
  -6   0   4 3532.67   66.23
  -6   0   3    0.45    0.21
   6   0  -3    0.70    0.25
   6   0  -3    0.79    0.28
  -6   0   3    0.51    0.34
   6   0  -3    0.80    0.42
  -6   0   3    0.36    0.23
  -6   0   3    1.07    0.40
   6   0  -2  513.89   10.22
   6   0  -2  485.73   10.24
  -6   0   2  484.73   10.15
   6   0  -2  484.05   10.14
  -6   0   2  485.19   10.01
  -6   0   2  480.86    9.84
  -6   0   2  505.28   10.12
  -6   0   1   -0.03    0.35
   6   0  -1    1.10    0.23
  -6   0   1    0.44    0.14
   6   0  -1    0.68    0.42
   6   0  -1    1.39    0.27
   6   0   0    2.43    0.57
  -6   0   0    2.17    0.30
   6   0   0    2.78    0.32
  -6   0   0    2.83    0.52
  -6   0  -1    0.96    0.28
  -6   0  -1    0.49    0.45
   6   0   1    0.20    0.23
   6   0   1   -0.05    0.36
  -6   0  -2 1540.63   31.36
   6   0   2 1737.80   31.69
   6   0   3    0.11    0.49
  -6   0  -3    1.07    0.53
   6   0   3    0.33    0.31
   6   0   4   94.33    3.60
   6   0   5    0.37    0.68
  -6   0  -5   -0.06    0.53
  -6   0  -6 4213.59   81.44
   6   0   6 4258.24   81.71
   6   0   7    0.07    0.66
   6   0   7    0.33    0.72
  -6   0  -7   -0.04    0.62
   6   0   8  753.47   17.79
  -6   0  -8  794.17   17.57
   6   0   8  761.84   18.37
  -6   0  -9    0.40    0.68
   6   0   9    0.15    0.74
   6   0   9    0.13    1.00
   6   0  10 2035.42   43.90
  -6   0 -10 2062.81   42.17
   6   0  10 2123.46   42.81
   6   0  11   -0.19    0.88
  -6   0 -11   -0.34    0.77
   6   0  11   -0.68    1.24
  -6   0 -12   18.64    1.89
   6   0  12   19.94    2.66
  -6   0 -13    0.13    0.71
   6   0  13   -0.35    1.25
  -6   0 -14   56.23    3.23
   6   0  14   68.69    5.10
   6   0  15   -0.69    1.94
   6   0  16  248.71   11.07
   6  -2 -17   -0.80    1.54
  -6  -2  17   -0.82    1.87
  -6   2  17    4.79    2.29
  -6   2  17   -0.69    1.58
  -6   2  16  178.82    8.72
   6  -2 -16  166.63    7.59
  -6   2  16  176.49    8.59
  -6  -2  16  181.23    9.28
   6  -2 -15    9.16    1.91
  -6   2  15    8.11    2.17
  -6   2  15    8.69    2.20
  -6  -2  15    9.27    2.60
  -6   2  14  306.93   11.14
  -6   2  14  330.83   11.53
   6  -2 -14  293.97   10.12
  -6  -2  14  339.80   12.30
   6  -2 -13   69.54    1.93
  -6  -2  13   80.90    5.30
  -6   2  13   68.65    4.67
  -6   2  13   71.62    4.63
   6  -2 -13   71.44    1.84
   6  -2 -12   95.58    2.55
  -6   2  12   95.94    5.25
  -6  -2  12  103.02    5.77
  -6   2  12   89.41    5.04
   6  -2 -12   87.90    2.73
   6  -2 -11  320.17    6.97
   6  -2 -11  297.09    9.32
   6  -2 -11  321.17    7.39
  -6   2  11  317.38   10.12
  -6   2  11  315.91   10.24
  -6  -2  11  321.03   10.89
  -6   2  10   32.25    2.75
  -6  -2  10   35.95    3.06
   6  -2 -10   35.32    2.51
   6  -2 -10   33.83    3.06
  -6   2  10   34.79    2.81
   6  -2 -10   27.37    1.30
   6  -2 -10   33.96    1.71
   6  -2  -9  445.38   11.60
   6  -2  -9  462.29   12.98
  -6   2   9  458.94   12.24
  -6   2   9  467.58   12.39
   6  -2  -9  452.58    9.66
  -6   2   8    6.09    1.25
   6  -2  -8    4.07    0.92
   6  -2  -8    5.88    1.31
  -6  -2   8    5.06    0.42
  -6   2   8    5.13    1.13
   6  -2  -8    5.19    0.61
  -6  -2   7   38.85    1.29
  -6   2   7   38.10    2.39
   6  -2  -7   37.38    2.63
   6  -2  -7   33.07    2.06
  -6   2   7   34.89    2.35
   6  -2  -6 1522.91   30.52
  -6   2   6 1499.69   30.92
   6  -2  -6 1557.09   31.58
  -6  -2   6 1488.12   28.89
  -6   2   6 1476.31   30.87
   6  -2  -6 1543.10   29.36
  -6   2   5  334.99    8.48
   6  -2  -5  339.79    7.57
   6  -2  -5  351.75    8.89
  -6   2   5  349.68    8.58
   6  -2  -5  351.76    9.06
   6  -2  -5  317.90    8.13
   6  -2  -4 1884.22   35.67
  -6   2   4 1914.93   36.31
   6  -2  -4 1794.11   36.04
   6  -2  -4 1793.95   36.70
  -6   2   4 1817.04   36.36
  -6   2   4 1870.99   36.32
   6  -2  -4 1851.31   36.72
   6  -2  -3  946.32   19.39
  -6   2   3  928.32   18.87
   6  -2  -3  931.98   18.93
  -6   2   3  927.42   19.14
   6  -2  -3  973.45   19.39
  -6   2   3  937.36   18.90
   6  -2  -3  909.38   18.71
  -6   2   3  914.84   18.77
   6  -2  -2 3125.87   61.03
  -6   2   2 3141.05   60.72
   6  -2  -1 3279.96   68.49
   6  -2  -1 3976.18   68.61
  -6   2   0   11.03    0.89
   6   2   0   12.99    0.61
   6  -2   0   11.30    1.04
   6  -2   0    8.39    0.76
   6  -2   0    9.57    0.74
  -6  -2   0    8.55    0.52
  -6   2   0    8.51    0.74
  -6   2   0   11.44    0.95
   6  -2   1  367.61    8.55
  -6  -2  -1  371.67    9.02
  -6   2  -1  370.42    8.31
  -6   2  -1  329.43    8.20
  -6  -2  -1  355.69    7.53
   6   2   1  362.15    7.34
   6   2   1  365.38    7.29
  -6   2  -1  334.90    7.96
   6  -2   1  354.69    7.86
  -6   2  -2 2581.31   50.24
  -6  -2  -2 2683.28   51.15
   6  -2   2 2651.29   49.74
  -6   2  -2 2796.01   50.37
  -6  -2  -2 2727.43   49.76
   6  -2   2 2651.28   50.61
   6  -2   3   67.17    2.85
  -6   2  -3   69.71    2.76
   6   2   3   68.73    2.33
  -6   2  -3   66.01    2.62
  -6  -2  -3   72.08    2.57
  -6  -2  -3   68.41    3.12
  -6   2  -4  707.81   15.44
   6  -2   4  739.74   15.50
  -6  -2  -4  748.59   16.53
  -6  -2  -4  742.12   15.66
   6  -2   4  728.81   16.02
   6   2   4  684.93   15.22
  -6  -2  -5  968.00   21.44
  -6  -2  -5 1014.32   21.03
   6  -2   5  986.04   20.60
  -6   2  -5  973.56   20.45
   6   2   5  944.70   20.52
   6  -2   5  986.22   21.09
  -6  -2  -6 4471.60   85.03
   6  -2   6 4387.01   84.45
   6  -2   6 4404.38   84.09
   6   2   6 4206.54   84.02
  -6   2  -6 4427.55   83.64
  -6   2  -7   96.43    3.68
   6  -2   7   96.82    4.15
  -6  -2  -7   94.16    4.29
   6  -2   7   99.45    4.06
   6   2   7   90.30    4.00
   6   2   8   42.66    2.82
  -6  -2  -8   43.96    2.86
   6  -2   8   41.95    2.73
  -6   2  -8   43.97    2.40
   6  -2   8   42.15    2.71
   6  -2   9   20.47    2.03
   6  -2   9   19.29    1.92
  -6  -2  -9   20.63    2.10
  -6   2  -9   16.92    1.53
   6   2   9   20.07    2.16
  -6   2 -10  665.23   15.39
   6  -2  10  704.99   16.93
   6   2  10  671.60   17.15
   6  -2  10  657.63   16.51
  -6  -2 -10  662.22   16.65
   6  -2  11    1.33    0.87
  -6  -2 -11    1.10    0.93
  -6   2 -11    0.74    0.65
   6   2  11    2.06    1.24
  -6  -2 -12    9.44    1.71
   6  -2  12    9.33    1.62
  -6   2 -12    8.78    1.31
   6   2  12    6.61    1.75
   6   2  13  194.00    8.23
  -6  -2 -13  173.71    6.87
   6  -2  13  193.18    7.22
  -6   2 -13  170.96    5.95
   6  -2  13  187.58    8.74
   6   2  14  647.30   17.91
   6  -2  14  646.55   16.07
   6  -2  14  630.10   18.72
   6  -2  15   30.55    2.73
   6  -2  15   30.70    3.93
   6   2  15   26.35    3.47
   6   2  16  114.14    6.93
   6  -2  16  112.91    7.50
   6   2  16  121.26    7.35
   6  -4 -16   19.77    2.73
  -6  -4  16   15.94    3.11
  -6   4  16   22.17    2.95
  -6   4  16   19.86    2.91
   6  -4 -15  273.26   10.07
  -6  -4  15  272.62   11.83
  -6   4  15  266.88   10.39
   6  -4 -14   28.53    1.80
  -6  -4  14   29.50    3.68
  -6   4  14   28.60    3.14
   6  -4 -14   32.05    3.09
  -6  -4  13  536.67   11.21
   6  -4 -13  514.00   13.21
   6  -4 -13  542.75   14.97
   6  -4 -13  525.76   12.25
  -6   4  13  562.12   15.56
  -6   4  13  557.51   15.56
  -6   4  12  135.20    6.25
  -6  -4  12  139.20    4.06
   6  -4 -12  139.22    5.98
   6  -4 -12  121.85    5.05
  -6   4  12  142.62    6.44
   6  -4 -12  127.36    4.42
  -6  -4  11   27.42    2.66
   6  -4 -11   33.24    2.77
  -6  -4  11   29.69    1.71
  -6   4  11   23.65    2.47
  -6   4  11   34.22    2.95
   6  -4 -11   33.42    2.03
  -6   4  10    5.93    1.34
   6  -4 -10    2.49    1.15
  -6   4  10    4.34    1.25
  -6  -4  10    4.86    0.81
  -6  -4  10    5.29    1.25
   6  -4 -10    7.40    1.83
   6  -4 -10    2.86    0.75
  -6  -4   9 1649.91   33.76
   6  -4  -9 1620.22   33.94
  -6  -4   9 1639.50   31.95
   6  -4  -9 1572.17   35.56
  -6   4   9 1680.39   34.33
   6  -4  -9 1522.83   32.43
  -6   4   9 1624.11   34.18
  -6   4   8  230.46    7.28
   6  -4  -8  222.86    6.38
  -6   4   8  234.91    7.34
  -6  -4   8  225.99    6.02
   6  -4  -8  209.90    7.93
   6  -4  -8  225.81    7.15
  -6  -4   8  229.92    6.94
  -6   4   7  122.42    4.72
  -6   4   7  116.17    4.56
   6  -4  -7  121.55    4.59
  -6  -4   7  126.18    4.40
   6  -4  -7  122.60    5.29
   6  -4  -7  122.28    5.46
   6  -4  -7  121.63    4.20
   6  -4  -6   27.57    2.33
  -6  -4   6   32.14    1.88
  -6   4   6   29.83    2.04
   6  -4  -6   28.04    2.30
  -6   4   6   29.90    2.06
   6  -4  -6   28.58    1.98
   6  -4  -6   34.11    2.02
  -6  -4   6   30.37    1.77
   6  -4  -5 1603.01   32.37
  -6  -4   5 1606.20   31.59
   6  -4  -5 1581.93   32.15
   6  -4  -5 1630.60   33.35
   6  -4  -5 1685.48   33.57
  -6   4   5 1566.95   32.20
  -6   4   5 1568.31   32.20
  -6   4   4    0.43    0.85
  -6   4   4    2.64    0.71
   6  -4  -4    1.75    0.76
  -6  -4   4    3.77    0.72
  -6  -4   4    2.48    0.60
   6  -4  -4    1.50    0.67
  -6   4   4    1.26    0.67
   6  -4  -4    2.75    0.75
  -6   4   3  280.34    7.06
   6  -4  -3  274.04    7.39
  -6  -4   3  278.36    6.33
  -6   4   3  275.73    7.06
   6   4  -3  278.80    5.96
   6  -4  -3  293.01    7.76
  -6  -4   3  277.88    6.76
  -6   4   3  280.06    7.63
   6   4  -2  910.95   18.40
  -6   4   2  920.45   18.96
  -6   4   2  922.28   19.54
   6   4  -2  921.58   17.90
   6  -4  -2  932.72   19.54
   6  -4  -2  878.14   19.42
  -6  -4   2  949.64   18.62
  -6   4   2  920.83   19.05
  -6  -4   2  919.21   18.03
   6  -4  -2  894.96   19.46
  -6  -4   1 2596.20   50.16
   6   4  -1 2745.55   50.44
   6  -4  -1 2578.19   51.85
   6   4  -1 2657.33   51.10
   6  -4  -1 2559.51   51.56
   6  -4  -1 2595.98   51.57
  -6   4   1 2593.66   51.31
  -6   4   1 2665.65   51.45
   6   4   0  274.70    6.70
   6   4   0  271.93    6.14
   6  -4   0  294.60    7.22
  -6  -4   0  285.69    6.65
  -6  -4   0  278.95    6.24
  -6   4   0  276.47    7.28
  -6   4   0  293.60    7.27
  -6  -4   0  276.70    6.25
  -6   4   0  303.32    7.78
   6  -4   0  297.07    7.14
   6  -4   0  276.86    7.54
  -6   4  -1 1142.62   23.98
  -6   4  -1 1209.25   24.24
   6  -4   1 1208.67   23.54
   6   4   1 1074.09   22.89
  -6  -4  -1 1177.99   22.77
   6   4   1 1155.22   22.36
  -6  -4  -1 1189.66   23.18
  -6  -4  -1 1175.45   22.91
   6  -4   1 1202.85   23.60
   6  -4   1 1210.05   24.26
  -6   4  -1 1094.74   23.74
  -6  -4  -2 2324.57   45.04
  -6   4  -2 2460.40   46.06
  -6   4  -2 2173.89   45.63
  -6  -4  -2 2271.77   44.84
  -6   4  -2 2237.53   45.94
   6  -4   2 2481.42   45.39
   6   4   2 2393.40   44.27
  -6  -4  -2 2307.17   45.21
   6   4   2 2231.51   44.59
   6  -4   2 2429.60   45.43
   6  -4   2 2300.28   46.06
   6  -4   3 1174.53   24.26
   6  -4   3 1200.53   25.21
  -6   4  -3 1259.45   25.05
   6   4   3 1205.97   23.65
   6   4   3 1219.75   23.81
   6  -4   3 1207.44   24.43
  -6  -4  -3 1177.64   24.57
   6  -4   4  262.82    6.93
   6  -4   4  250.62    6.72
  -6  -4  -4  259.69    7.24
   6  -4   4  243.56    7.33
   6   4   4  244.73    6.36
   6   4   4  251.14    6.43
  -6   4  -4  263.39    7.18
  -6   4  -4  235.24    7.45
   6  -4   5   11.56    1.23
  -6   4  -5   12.70    1.73
   6  -4   5   12.14    1.29
   6   4   5   12.19    1.20
   6   4   5   10.75    1.13
  -6  -4  -5   14.83    1.56
  -6   4  -5   10.56    1.26
   6  -4   5   15.10    1.61
   6   4   6  247.51    6.89
   6   4   6  238.64    7.03
   6  -4   6  239.90    7.56
  -6  -4  -6  260.25    8.47
   6  -4   6  241.36    6.95
  -6  -4  -6  246.13    7.75
   6  -4   6  253.71    7.22
  -6   4  -6  255.37    7.20
  -6   4  -7  411.16   10.54
   6  -4   7  426.84   10.92
   6  -4   7  404.33   11.23
  -6  -4  -7  412.68   11.99
   6   4   7  419.24   10.64
   6   4   7  413.86   10.83
  -6  -4  -7  415.00   11.61
   6  -4   8   21.54    2.13
   6   4   8   19.09    1.87
  -6  -4  -8   18.22    2.09
   6   4   8   17.24    1.83
  -6   4  -8   20.45    1.79
  -6  -4  -8   20.02    2.34
   6  -4   8   20.18    1.94
   6   4   9  488.29   13.24
  -6  -4  -9  510.08   14.46
   6  -4   9  521.05   13.89
  -6  -4  -9  523.54   14.53
  -6   4  -9  526.62   12.83
   6  -4   9  531.70   13.54
   6   4   9  526.47   13.68
   6   4  10   39.16    2.96
   6  -4  10   46.76    3.29
  -6  -4 -10   44.93    3.48
   6   4  10   41.22    3.22
  -6   4 -10   43.16    2.68
   6  -4  11   79.34    4.48
  -6  -4 -11   81.02    4.81
   6   4  11   81.34    4.63
  -6   4 -11   74.16    3.69
   6   4  11   76.71    4.41
  -6   4 -12   57.97    3.30
   6   4  12   63.66    4.30
  -6  -4 -12   63.75    4.35
   6  -4  12   74.17    4.40
   6   4  12   69.59    4.35
   6   4  13  590.17   16.13
  -6   4 -13  524.73   13.85
   6  -4  13  575.96   15.67
   6   4  13  590.07   16.44
  -6  -4 -13  529.91   15.80
   6   4  14  241.57    9.80
   6  -4  14  254.01    9.22
   6   4  14  248.68    9.73
   6   4  15    3.24    1.78
   6   4  15    1.40    1.77
  -6   6  15  188.86    8.30
  -6   6  15  198.89    8.63
   6  -6 -15  197.61    8.45
   6  -6 -14  273.66   10.04
  -6   6  14  275.66   10.09
  -6   6  14  283.14    9.99
   6  -6 -14  257.24    8.12
   6  -6 -13  386.55   12.20
  -6   6  13  398.48   12.24
   6  -6 -13  367.99   10.45
  -6   6  13  383.61   12.08
   6  -6 -12   70.96    3.64
  -6  -6  12   65.60    3.47
   6  -6 -12   74.92    4.49
  -6   6  12   72.06    4.41
  -6   6  12   74.97    4.50
  -6  -6  11   28.71    2.21
  -6   6  11   29.24    2.77
  -6   6  11   29.80    2.79
   6  -6 -11   32.85    2.91
   6  -6 -11   28.47    2.33
  -6   6  10   71.46    4.03
   6  -6 -10   63.12    3.48
  -6  -6  10   66.84    3.65
  -6  -6  10   66.56    3.35
  -6   6  10   64.84    3.84
   6  -6 -10   68.57    4.05
  -6  -6   9  546.76   13.08
   6  -6  -9  521.11   13.39
   6  -6  -9  535.23   14.02
  -6   6   9  561.99   14.04
  -6   6   9  536.74   13.85
  -6  -6   9  514.12   13.25
  -6  -6   8    3.10    1.03
   6  -6  -8    3.21    1.38
  -6   6   8    6.22    1.43
   6  -6  -8    2.89    1.02
  -6  -6   8    2.57    1.04
  -6   6   8    3.81    1.28
   6  -6  -8    3.87    1.41
  -6  -6   8    1.74    0.89
  -6  -6   7   97.25    3.84
   6  -6  -7  102.77    5.46
  -6  -6   7   98.65    4.07
   6  -6  -7   97.73    4.33
   6  -6  -7  107.57    4.57
  -6  -6   7  104.26    4.24
  -6   6   7   98.95    4.28
  -6   6   7   92.06    4.15
   6  -6  -7   99.98    5.25
  -6  -6   6   53.66    2.97
  -6   6   6   49.88    2.86
   6  -6  -6   59.26    3.76
  -6  -6   6   54.24    2.82
  -6  -6   6   52.19    2.52
   6  -6  -6   47.41    3.55
  -6   6   6   55.32    2.93
  -6   6   5 2969.54   59.37
  -6  -6   5 2915.86   56.74
  -6  -6   5 2847.21   57.29
   6  -6  -5 2941.82   58.42
   6  -6  -5 2997.54   59.57
   6  -6  -5 3076.20   60.00
  -6  -6   4   28.88    1.64
  -6   6   4   28.34    2.02
  -6  -6   4   30.60    1.91
   6   6  -4   32.53    1.58
  -6   6   4   27.77    2.25
   6  -6  -4   32.27    2.52
   6  -6  -4   31.39    2.55
  -6   6   4   30.11    2.07
   6  -6  -4   29.28    2.28
  -6  -6   3   35.40    1.99
   6   6  -3   29.90    1.58
  -6   6   3   31.20    2.08
   6   6  -3   32.36    2.01
   6  -6  -3   30.33    2.46
  -6  -6   3   32.39    1.64
   6  -6  -3   33.21    2.46
  -6   6   3   28.78    2.31
   6   6  -2  403.55    9.44
  -6   6   2  381.32   10.77
  -6  -6   2  464.44    9.53
  -6  -6   2  408.66    9.84
   6  -6  -2  335.24   10.40
   6  -6  -2  414.34   10.91
   6  -6  -2  396.53   10.87
   6   6  -2  389.38    9.75
  -6   6   2  461.16   10.61
   6   6  -1 3041.61   62.62
  -6  -6   1 3194.80   62.97
   6   6  -1 2889.13   63.25
   6  -6  -1 3037.21   64.18
  -6   6   1 3353.13   63.85
   6  -6  -1 3442.51   64.20
  -6  -6   1 3267.45   62.36
   6  -6  -1 3244.70   63.80
  -6   6   1 3221.25   64.09
  -6   6   1 3023.82   63.53
  -6   6   0  330.15    8.86
  -6   6   0  331.60    8.93
   6   6   0  327.02    7.74
   6   6   0  330.00    8.47
   6  -6   0  344.39    8.72
  -6  -6   0  317.33    7.78
  -6  -6   0  329.94    8.34
  -6   6   0  316.32    8.80
   6  -6   0  349.53    8.86
  -6   6  -1  156.82    5.56
  -6  -6  -1  148.05    4.68
   6   6   1  151.78    4.89
  -6  -6  -1  157.61    5.14
   6   6   1  163.91    4.48
   6  -6   1  153.62    5.08
   6  -6   1  163.99    5.19
  -6   6  -1  155.08    5.57
   6  -6   1  161.13    5.86
  -6  -6  -2   30.46    1.78
  -6  -6  -2   29.49    1.90
   6   6   2   26.92    1.74
  -6   6  -2   29.09    2.28
   6   6   2   27.82    1.51
  -6  -6  -2   29.94    2.04
   6  -6   2   22.92    1.79
   6  -6   2   25.76    2.24
  -6   6  -2   25.96    2.23
  -6  -6  -3 1571.73   30.55
   6  -6   3 1513.43   30.74
   6   6   3 1525.83   30.27
   6   6   3 1506.72   29.64
  -6   6  -3 1418.69   31.90
   6  -6   3 1474.55   31.82
   6  -6   3 1420.43   30.58
  -6  -6  -3 1495.10   31.30
  -6  -6  -3 1536.15   30.84
   6  -6   4  374.82    9.74
  -6  -6  -4  387.29    9.77
  -6   6  -4  349.85   10.80
   6  -6   4  387.70   10.77
   6   6   4  379.14    8.92
   6  -6   4  383.54    9.77
  -6  -6  -4  389.04   10.54
   6   6   4  375.73    9.27
   6  -6   5 1291.89   27.06
  -6   6  -5 1273.85   28.84
   6   6   5 1259.38   26.11
  -6  -6  -5 1322.41   28.40
   6   6   5 1296.43   26.53
   6  -6   5 1278.73   28.18
  -6  -6  -5 1310.38   27.24
   6  -6   5 1263.30   27.01
   6  -6   6  149.11    6.03
   6  -6   6  138.57    5.17
   6  -6   6  149.32    5.34
  -6   6  -6  141.55    6.34
   6   6   6  145.19    4.88
   6   6   6  142.58    4.91
  -6  -6  -6  151.62    6.21
  -6  -6  -6  146.77    5.50
  -6  -6  -7  415.31   12.63
   6  -6   7  445.65   12.45
   6   6   7  457.40   11.14
   6   6   7  437.69   11.06
  -6   6  -7  414.89   11.79
  -6  -6  -7  435.23   11.78
  -6  -6  -8   11.27    1.97
   6  -6   8    6.84    1.71
  -6  -6  -8    9.83    2.11
   6   6   8   12.65    1.67
  -6  -6  -8    9.18    1.60
  -6   6  -8   11.69    1.73
  -6  -6  -9  696.08   17.27
   6   6   9  661.28   16.38
   6   6   9  670.39   16.17
   6  -6   9  658.19   17.62
  -6  -6 -10   93.70    5.02
   6   6  10  107.06    4.84
   6   6  10  105.36    4.96
   6  -6  10   95.85    5.37
   6   6  11  300.09    9.51
   6  -6  11  293.98   10.49
   6   6  11  299.64    9.79
  -6  -6 -11  289.69   10.12
   6  -6  12   10.44    2.17
   6   6  12    8.18    1.77
   6   6  12    4.80    1.60
  -6  -6 -12    3.47    1.39
   6  -6  13  284.18   10.63
   6   6  13  283.62   10.07
   6   6  13  281.28    9.78
  -6  -6 -13  279.76   10.46
   6   6  14   46.80    3.80
  -6  -6 -14   50.71    4.29
   6   6  14   42.71    3.79
  -6   8  13  103.23    5.57
  -6   8  13  103.81    5.59
   6  -8 -12   19.10    2.65
  -6  -8  12   18.88    2.18
  -6   8  12   14.50    2.24
   6  -8 -12   16.62    2.17
  -6   8  12   15.46    2.32
  -6   8  11   11.66    1.95
  -6  -8  11   10.38    1.68
   6  -8 -11   10.60    1.87
   6  -8 -11   16.73    2.48
  -6   8  11   12.79    1.99
   6  -8 -10   69.76    4.38
   6  -8 -10   72.02    4.20
  -6  -8  10   75.24    4.16
  -6   8  10   69.70    4.13
  -6   8  10   77.45    4.30
  -6   8   9  446.46   12.25
  -6   8   9  413.08   11.97
   6  -8  -9  420.22   12.38
  -6  -8   9  453.03   12.20
  -6   8   8    7.06    1.57
  -6   8   8    7.77    1.66
  -6  -8   8    4.96    1.12
   6  -8  -8    3.42    1.32
  -6  -8   8    6.64    1.51
  -6  -8   7   20.08    1.82
  -6   8   7   24.21    2.25
  -6   8   7   19.94    2.10
   6  -8  -7   19.11    2.25
  -6  -8   7   24.69    2.35
  -6  -8   6   93.14    4.55
  -6   8   6   85.80    4.17
   6  -8  -6   85.72    4.62
   6   8  -6   95.04    3.42
  -6   8   6   85.85    4.12
  -6  -8   6   79.75    3.48
  -6   8   5  662.58   15.74
  -6  -8   5  613.20   14.39
   6  -8  -5  662.51   16.65
  -6  -8   5  663.96   16.45
   6   8  -5  657.64   14.38
  -6   8   4  379.39   10.20
   6   8  -4  393.95    9.35
  -6  -8   4  368.58    9.17
  -6  -8   4  356.78    9.72
  -6   8   4  354.10   10.22
  -6  -8   4  368.74   10.86
  -6   8   3    3.11    1.21
  -6   8   3    5.01    1.22
   6   8  -3    4.83    1.14
  -6  -8   3    3.35    0.96
  -6  -8   3    2.91    0.76
   6  -8  -3    3.97    1.51
   6   8  -3    2.95    0.76
   6   8  -2   38.07    2.49
  -6   8   2   37.95    2.97
   6  -8  -2   38.36    2.90
  -6   8   2   38.77    2.74
   6  -8  -2   35.56    2.90
  -6  -8   2   36.57    2.08
  -6  -8   2   39.06    2.49
  -6   8   2   42.29    2.78
   6   8  -1  138.86    5.01
  -6   8   1  147.00    5.96
  -6   8   1  140.50    5.51
  -6   8   1  145.60    5.68
   6  -8  -1  142.51    6.02
   6   8  -1  146.53    5.68
  -6  -8   1  144.14    4.79
   6  -8  -1  135.68    5.58
  -6  -8   1  145.81    5.25
   6   8   0  166.55    5.33
   6  -8   0  154.44    5.82
   6   8   0  160.12    5.95
  -6   8   0  175.98    6.53
  -6  -8   0  158.20    5.74
  -6   8   0  156.43    6.14
  -6   8   0  166.52    6.19
   6  -8   0  161.41    6.56
  -6   8  -1   76.44    4.18
  -6  -8  -1   81.49    4.02
   6   8   1   79.74    3.40
  -6  -8  -1   81.47    3.68
   6   8   1   82.32    3.90
  -6   8  -1   70.84    4.02
   6  -8   1   77.51    3.76
  -6   8  -1   86.84    4.22
   6  -8   1   82.31    4.48
   6   8   2   32.78    2.41
  -6  -8  -2   30.48    2.51
   6   8   2   31.14    1.97
   6  -8   2   37.03    3.06
  -6  -8  -2   31.35    2.34
   6  -8   2   29.15    2.21
  -6   8  -2   32.64    2.85
   6   8   3 1001.63   20.94
  -6  -8  -3  951.90   22.90
   6   8   3  991.73   21.80
  -6   8  -3 1046.89   23.81
   6  -8   3 1014.11   23.49
  -6  -8  -3  937.75   22.21
   6   8   4    6.16    1.23
  -6  -8  -4    4.86    1.43
  -6   8  -4    7.40    1.82
  -6  -8  -4    4.79    1.28
   6  -8   4    4.95    1.48
  -6  -8  -4    6.97    1.34
   6   8   4    5.32    1.03
   6   8   5  146.30    4.85
   6   8   5  148.47    5.34
  -6   8  -5  146.74    6.87
  -6  -8  -5  150.93    5.49
   6  -8   5  142.01    6.38
  -6  -8  -5  137.43    6.41
   6  -8   6    2.01    1.38
  -6   8  -6    3.03    1.52
   6   8   6    3.59    1.14
  -6  -8  -6    3.49    1.09
   6   8   6    3.07    1.00
   6  -8   7  347.89   11.35
   6   8   7  338.59    9.49
   6   8   7  331.21    9.07
  -6  -8  -7  342.32   10.15
   6  -8   8   66.06    4.57
  -6  -8  -8   68.49    4.08
   6   8   8   69.47    3.49
   6   8   8   64.63    3.58
  -6  -8  -9   80.32    4.59
   6  -8   9   87.48    5.45
   6   8   9   80.26    4.13
   6   8   9   86.85    4.12
   6   8  10    8.61    1.67
   6   8  10   10.25    1.74
  -6  -8 -10    9.86    1.75
   6  -8  10    9.33    2.18
   6  -8  11   65.01    4.93
   6   8  11   72.12    4.11
   6   8  11   66.84    3.98
  -6  -8 -11   60.11    4.33
   6   8  12    0.79    1.31
  -6  -8 -12    2.03    1.62
   6  -8  12   -0.09    1.49
   6   8  12    2.80    1.55
  -6  10   9   68.12    4.32
  -6 -10   9   69.15    4.45
  -6  10   9   69.17    4.28
   6 -10  -9   66.86    4.53
  -6 -10   8   10.78    2.01
   6 -10  -8    8.55    2.00
  -6  10   8    9.44    1.87
  -6  10   7    6.64    1.66
  -6  10   7    5.28    1.61
   6 -10  -7    6.31    1.92
  -6 -10   7    5.16    1.52
  -6 -10   6    1.72    1.43
  -6  10   6    2.60    1.29
   6 -10  -6    8.13    2.10
  -6  10   6    8.69    1.77
  -6 -10   5   73.30    4.51
  -6  10   5   72.57    4.32
   6 -10  -5   72.93    4.71
  -6  10   5   68.71    4.07
   6 -10  -4   94.58    5.42
  -6 -10   4   95.49    5.40
  -6  10   4  102.58    5.16
  -6  10   4  105.75    5.05
  -6  10   3    4.19    1.25
   6  10  -3    3.64    1.33
  -6 -10   3    3.19    1.24
  -6  10   3    4.76    1.57
   6 -10  -3    6.82    1.98
   6  10  -2  492.53   13.33
  -6 -10   2  502.71   14.55
   6 -10  -2  527.15   14.88
  -6  10   2  491.50   13.97
  -6 -10   2  462.61   12.28
  -6  10   2  501.54   13.74
  -6  10   1  208.91    8.03
  -6  10   1  210.36    7.81
   6  10  -1  212.32    7.28
  -6 -10   1  191.18    6.78
   6 -10  -1  211.33    8.45
   6  10   0   80.42    4.08
   6  10   0   85.14    4.64
  -6  10   0   84.60    4.92
  -6 -10   0   74.31    3.94
   6 -10   0   87.54    5.23
  -6  10   0   81.63    4.66
  -6  10  -1    6.00    1.69
   6  10   1    6.85    1.32
   6  10   1    7.91    1.63
  -6  10  -1   10.95    2.14
  -6 -10  -1    5.89    1.23
   6 -10   1   12.16    2.30
  -6  10  -2  447.87   13.45
   6  10   2  430.72   12.31
   6  10   2  419.07   11.22
   6 -10   2  417.94   13.40
  -6  10  -3  499.13   14.94
   6  10   3  492.70   13.39
   6  10   3  490.91   12.37
   6 -10   3  457.68   14.44
   6 -10   4    0.36    1.33
   6  10   4    1.43    1.01
   6  10   4    3.43    1.54
  -6  10  -4    0.24    1.56
   6  10   5   38.28    2.99
  -6  10  -5   28.72    3.31
   6  10   5   33.64    2.42
   6 -10   5   38.04    3.59
   6 -10   6  207.30    8.97
  -6  10  -6  200.12    9.43
   6  10   6  222.36    7.74
   6  10   6  216.53    6.95
   6 -10   7   29.77    3.53
   6  10   7   23.01    2.37
   6  10   7   24.13    2.15
  -6 -10  -8    4.92    1.75
   6 -10   8    6.33    2.20
   6  10   8    7.56    1.59
   6  10   8    3.92    1.40
   7  -1 -17   41.82    3.76
  -7  -1  17   39.79    4.50
  -7   1  17   43.40    4.48
  -7   1  17   43.24    4.39
  -7  -1  17   38.24    4.44
  -7   1  16  209.31    9.69
  -7   1  16  224.41    9.81
  -7  -1  16  229.27   10.31
  -7   1  15 1060.36   27.29
  -7  -1  15 1042.40   27.70
  -7   1  15 1112.84   27.35
  -7   1  14   42.39    3.74
  -7   1  14   37.74    3.68
  -7  -1  14   38.03    3.88
  -7  -1  13  122.48    6.46
  -7   1  13  118.75    6.06
  -7   1  13  103.83    5.91
  -7   1  12   -0.22    1.12
  -7  -1  12    1.32    1.38
  -7   1  12   -0.39    1.44
  -7   1  11 1007.72   23.76
  -7  -1  11 1009.47   24.30
  -7   1  11 1005.56   23.99
  -7   1  10  536.77   14.12
  -7  -1  10  531.99   14.59
  -7   1  10  529.93   14.35
  -7  -1   9  795.68   18.93
  -7   1   9  778.18   18.63
  -7   1   9  761.34   18.34
   7  -1  -8    6.55    0.44
   7  -1  -8    5.67    0.91
  -7   1   8    7.82    1.21
  -7   1   8    5.82    1.14
   7  -1  -7  555.29   10.78
  -7  -1   7  521.92   13.35
   7  -1  -7  546.13   13.69
  -7   1   7  530.31   13.08
   7  -1  -7  541.12   12.48
  -7   1   7  541.61   13.31
   7  -1  -6 2725.82   51.59
   7  -1  -6 2859.11   52.93
  -7  -1   6 2497.24   52.29
  -7   1   6 2581.20   52.06
  -7   1   6 2663.30   52.34
  -7   1   5  708.60   15.60
   7  -1  -5  734.74   14.18
  -7  -1   5  727.77   15.74
  -7   1   5  707.96   15.46
   7  -1  -5  748.40   15.99
   7  -1  -5  684.67   14.93
  -7  -1   5  740.81   14.04
   7   1  -4  267.50    5.75
   7  -1  -4  265.88    5.92
  -7   1   4  265.55    6.65
  -7  -1   4  261.57    5.90
   7  -1  -4  264.23    6.27
  -7   1   4  258.11    6.41
   7  -1  -4  278.19    6.94
  -7   1   4  260.03    6.57
   7  -1  -4  267.19    6.93
  -7   1   4  261.91    5.81
  -7  -1   4  254.19    6.73
   7  -1  -3  145.24    4.18
   7  -1  -3  147.60    3.86
  -7   1   3  147.85    3.68
  -7  -1   3  145.01    3.88
  -7  -1   3  150.09    3.82
   7   1  -3  152.14    3.28
   7  -1  -3  147.25    4.22
  -7   1   3  146.66    4.00
  -7   1   3  148.43    3.99
  -7   1   3  140.79    3.93
  -7   1   2  354.70    7.55
  -7  -1   2  337.15    7.81
  -7  -1   2  353.94    6.76
  -7   1   2  347.91    7.56
   7   1  -2  344.60    7.85
  -7  -1   2  353.18    7.07
  -7   1   2  334.76    7.31
  -7   1   2  344.56    7.46
   7  -1  -2  348.18    7.68
   7  -1  -2  344.92    7.58
  -7   1   1 2930.57   55.53
  -7  -1   1 2971.69   55.97
   7  -1  -1 3006.82   55.82
  -7   1   0  831.47   16.97
  -7   1   0  888.81   17.83
   7  -1   0  832.58   17.25
  -7  -1   0  888.38   16.55
  -7  -1   0  877.33   18.22
   7   1   0  871.01   18.22
   7  -1   0  850.87   18.01
  -7   1   0  876.24   17.36
   7  -1   0  934.54   17.02
   7  -1   1  806.34   15.29
   7  -1   1  768.37   15.57
   7  -1   1  783.37   16.49
  -7   1  -1  768.23   15.74
  -7  -1  -1  827.40   16.77
  -7   1  -1  826.01   16.34
   7   1   1  820.59   15.07
   7   1   1  814.99   14.85
   7  -1   2   93.49    3.42
  -7   1  -2   89.94    2.94
   7   1   2   91.34    3.54
   7   1   2   97.60    2.60
   7  -1   2   94.84    2.84
  -7   1  -3  399.66    9.24
  -7  -1  -3  398.00    9.67
   7  -1   3  380.53    9.45
   7  -1   3  369.05    8.61
   7   1   3  393.18    9.65
   7   1   3  369.21    8.50
  -7   1  -4  340.74    8.57
   7  -1   4  349.42    8.96
  -7  -1  -4  332.50    8.91
   7  -1   4  348.10    8.23
   7   1   4  333.97    8.18
   7   1   4  342.34    9.03
   7  -1   5 2535.07   51.82
   7   1   5 2679.58   52.10
  -7   1  -5 2655.86   51.43
   7   1   5 2529.13   51.17
  -7  -1  -5 2733.33   52.11
   7  -1   5 2647.66   51.16
  -7   1  -6 1404.18   28.47
  -7  -1  -6 1368.10   28.99
   7   1   6 1369.48   28.59
   7  -1   6 1444.74   28.54
   7   1   6 1303.62   28.90
   7  -1   6 1362.08   28.96
  -7  -1  -7  407.59   10.87
   7  -1   7  402.52   10.88
   7  -1   7  421.35   10.66
   7   1   7  398.62   10.71
  -7   1  -7  411.25   10.36
   7   1   7  414.01   10.97
  -7  -1  -8  105.68    4.60
  -7   1  -8  105.29    4.18
   7  -1   8  109.29    4.72
   7  -1   8  113.24    4.63
   7   1   8  108.16    4.72
   7   1   8  108.07    4.69
  -7  -1  -9   60.18    3.45
  -7   1  -9   61.68    3.22
   7  -1   9   58.19    3.36
   7   1   9   61.78    3.72
   7  -1   9   56.56    3.39
   7   1  10   -0.41    1.20
   7  -1  10    2.46    1.07
   7  -1  10    1.62    1.01
   7  -1  10    1.07    1.18
  -7  -1 -10    2.73    1.17
  -7   1 -10    1.93    0.83
  -7   1 -11  506.44   12.82
   7  -1  11  515.17   15.19
   7   1  11  502.84   14.59
   7  -1  11  540.43   14.11
  -7  -1 -11  511.43   13.56
   7  -1  12   71.09    4.16
  -7   1 -12   68.92    3.53
  -7  -1 -12   73.48    3.97
   7  -1  12   69.25    4.90
   7   1  12   66.40    4.56
  -7  -1 -13    0.44    0.90
   7  -1  13    1.26    1.11
   7   1  13    0.50    1.42
   7  -1  13    1.22    1.44
  -7   1 -13    2.46    1.08
  -7  -1 -14    6.29    1.48
  -7   1 -14    6.88    1.30
   7   1  14    6.25    1.98
   7  -1  14    8.95    2.34
   7  -1  15  135.83    7.74
   7   1  15  133.61    7.42
   7   1  16   -0.15    1.76
   7  -1  16    0.06    1.99
   7  -3 -17   10.04    2.14
  -7  -3  17   15.17    3.31
   7  -3 -16   96.45    5.61
  -7   3  16  103.04    6.36
  -7  -3  16   89.83    6.58
  -7   3  16   86.15    5.75
  -7  -3  15  238.22   10.52
   7  -3 -15  219.85    8.67
  -7   3  15  208.68    9.01
  -7   3  15  226.01    9.41
  -7   3  14  257.62    9.72
   7  -3 -14  239.68    5.52
   7  -3 -14  244.84    8.87
  -7   3  13    1.79    1.43
   7  -3 -13    1.22    0.62
  -7  -3  13    2.11    1.57
  -7   3  13    1.42    1.29
   7  -3 -13    1.00    0.44
   7  -3 -13    1.12    1.06
   7  -3 -12  106.12    3.82
  -7  -3  12  125.45    6.53
  -7   3  12  101.19    5.23
   7  -3 -12  116.54    5.29
   7  -3 -12  106.88    3.36
  -7   3  12  113.24    5.71
   7  -3 -11  973.15   20.59
  -7   3  11 1002.18   23.18
  -7   3  11  931.01   22.84
   7  -3 -11  952.48   22.40
   7  -3 -11  991.52   19.86
  -7   3  10  734.72   17.60
  -7  -3  10  711.58   14.16
   7  -3 -10  683.19   18.50
  -7   3  10  680.60   17.41
   7  -3 -10  695.96   16.90
   7  -3 -10  700.78   14.87
  -7  -3   9  160.12    4.06
   7  -3  -9  158.93    6.70
  -7   3   9  154.32    6.00
  -7   3   9  161.74    6.01
   7  -3  -9  158.49    4.52
   7  -3  -9  159.25    5.69
   7  -3  -8  553.53   12.06
  -7   3   8  513.25   13.57
   7  -3  -8  549.82   13.35
  -7  -3   8  560.51   11.55
  -7   3   8  563.91   13.79
   7  -3  -8  559.19   14.65
  -7   3   7 1372.47   28.76
   7  -3  -7 1407.14   28.52
  -7   3   7 1362.96   28.71
   7  -3  -7 1346.71   27.39
   7  -3  -7 1414.56   29.95
  -7  -3   7 1325.71   26.88
   7  -3  -6  650.35   14.63
   7  -3  -6  637.92   13.90
  -7   3   6  682.87   14.98
   7  -3  -6  645.39   15.64
  -7   3   6  628.93   14.73
   7  -3  -6  668.11   15.63
  -7   3   5  866.68   18.88
   7  -3  -5  898.65   18.89
  -7   3   5  934.66   19.51
   7  -3  -5  898.50   19.80
  -7   3   5  919.88   19.08
   7  -3  -5  902.97   18.52
   7  -3  -4  420.79   10.43
  -7   3   4  413.20    9.73
  -7   3   4  412.68   10.23
   7  -3  -4  430.83    9.76
  -7  -3   4  439.56    9.31
  -7   3   4  410.74    9.80
   7  -3  -4  425.51    9.93
   7  -3  -3 1338.29   27.19
  -7   3   3 1362.53   27.14
  -7  -3   3 1262.60   25.73
  -7  -3   3 1260.89   26.06
  -7   3   3 1238.59   26.42
  -7   3   3 1339.63   26.68
   7  -3  -3 1313.86   26.79
  -7   3   2  200.83    5.49
   7  -3  -2  190.95    5.37
  -7  -3   2  198.80    4.20
  -7  -3   2  189.96    4.63
  -7   3   2  185.93    5.14
  -7   3   2  198.22    5.47
  -7   3   2  201.83    5.06
   7  -3  -2  202.73    5.45
  -7   3   1 1808.19   35.73
  -7  -3   1 1929.93   35.14
   7  -3  -1 1799.01   36.29
   7  -3  -1 1800.39   35.90
   7  -3  -1 1791.61   36.03
  -7   3   1 1852.48   35.95
  -7   3   1 1814.76   36.17
  -7   3   0    6.23    0.88
  -7   3   0    9.19    0.98
   7   3   0    7.71    0.41
  -7   3   0    8.30    0.93
  -7  -3   0    4.77    0.40
   7  -3   0    6.23    0.84
  -7  -3   0    4.96    0.52
   7  -3   0    5.53    0.81
   7  -3   1  660.38   14.25
  -7   3  -1  611.77   13.81
  -7   3  -1  637.60   13.68
   7   3   1  650.82   12.74
  -7  -3  -1  663.07   12.97
   7   3   1  660.99   12.30
   7  -3   1  622.14   13.35
   7  -3   1  684.98   13.66
   7  -3   2  425.95    9.81
   7  -3   2  459.90   10.12
  -7  -3  -2  439.44    9.73
   7   3   2  462.17    9.23
   7   3   2  438.86    9.26
   7  -3   2  441.56   10.66
  -7   3  -2  454.31   10.42
   7  -3   3 2275.46   46.84
  -7   3  -3 2429.82   47.61
  -7  -3  -3 2358.48   48.39
   7   3   3 2410.12   46.20
   7  -3   3 2156.65   47.46
   7   3   3 2344.65   46.33
  -7   3  -3 2500.60   47.34
  -7  -3  -3 2383.42   46.88
   7  -3   3 2350.04   46.66
   7  -3   4 2007.49   40.87
   7  -3   4 1981.07   39.79
  -7   3  -4 1960.66   40.77
   7   3   4 2088.95   39.87
   7   3   4 1998.94   39.53
  -7  -3  -4 2191.88   40.49
  -7   3  -4 2021.54   40.28
  -7  -3  -4 2077.64   41.74
   7  -3   4 2080.71   40.13
   7   3   5  107.85    3.73
   7  -3   5  112.19    3.98
   7   3   5  103.23    3.81
  -7  -3  -5  109.08    4.18
  -7  -3  -5  112.53    4.82
   7  -3   5  100.77    4.27
  -7   3  -5  104.71    3.91
   7  -3   6 2466.44   49.62
   7   3   6 2394.68   49.53
   7  -3   6 2431.15   50.29
   7   3   6 2463.79   49.35
  -7  -3  -6 2569.54   50.34
  -7  -3  -6 2486.18   51.05
  -7   3  -6 2600.65   49.51
  -7  -3  -7  720.36   17.66
   7  -3   7  744.95   16.67
   7  -3   7  703.06   17.05
   7   3   7  695.80   16.38
  -7  -3  -7  704.29   17.13
  -7   3  -7  720.25   16.13
  -7  -3  -8  528.77   14.41
   7   3   8  520.29   13.42
   7  -3   8  511.58   13.85
  -7   3  -8  541.25   12.97
   7   3   9   13.90    1.76
   7  -3   9   18.94    2.11
   7  -3   9   14.38    1.81
  -7  -3  -9   20.41    2.28
  -7   3  -9   16.33    1.58
   7   3  10  276.53    8.96
  -7   3 -10  257.26    7.77
  -7  -3 -10  274.71    9.25
   7  -3  10  269.46    8.97
  -7  -3 -11  753.18   19.58
   7   3  11  792.23   19.49
   7  -3  11  788.70   19.42
   7   3  11  819.74   19.99
  -7   3 -11  742.28   17.66
   7  -3  12   15.87    2.11
  -7   3 -12   15.81    1.72
   7   3  12   13.62    2.13
  -7  -3 -12   16.77    2.13
   7   3  12   17.74    2.34
   7   3  13    1.88    1.51
  -7  -3 -13    1.14    1.27
   7   3  13    0.27    1.34
   7  -3  13    1.38    1.19
  -7   3 -13    1.54    0.92
   7  -3  14  339.40   13.18
   7   3  14  349.28   12.20
   7  -3  14  325.17   10.86
   7   3  14  318.07   11.59
   7   3  15   37.37    4.01
   7  -3  15   40.60    4.65
   7   3  15   40.83    3.96
   7  -5 -16   12.31    2.34
  -7  -5  16   12.04    2.94
  -7   5  15   58.18    4.51
   7  -5 -15   64.76    4.63
  -7  -5  15   68.83    5.84
  -7   5  15   62.47    4.66
  -7   5  14 1105.10   26.41
   7  -5 -14 1057.00   22.95
   7  -5 -14 1137.11   26.33
  -7   5  14 1054.75   26.19
   7  -5 -13   36.82    3.24
  -7   5  13   34.08    3.24
  -7  -5  13   34.07    1.90
   7  -5 -13   29.64    2.60
  -7   5  13   37.75    3.42
   7  -5 -13   33.60    2.27
  -7  -5  12   67.40    2.95
  -7   5  12   61.53    4.05
  -7   5  12   73.14    4.51
   7  -5 -12   74.59    4.36
   7  -5 -11  190.08    7.08
  -7  -5  11  183.09    5.57
  -7   5  11  175.13    6.97
  -7  -5  11  184.83    6.86
  -7   5  11  188.52    7.21
   7  -5 -11  183.93    5.95
  -7   5  10  157.44    6.24
   7  -5 -10  161.88    5.40
  -7   5  10  156.86    6.28
  -7  -5  10  164.05    6.08
  -7  -5  10  153.50    4.97
   7  -5 -10  154.86    6.13
   7  -5  -9  311.02    9.19
  -7  -5   9  314.54    8.89
  -7   5   9  317.45    9.32
  -7   5   9  320.28    9.32
   7  -5  -9  305.36    8.43
  -7  -5   9  312.84    8.04
  -7  -5   8   36.74    2.40
   7  -5  -8   34.94    2.61
  -7   5   8   38.97    2.71
   7  -5  -8   43.46    3.44
  -7   5   8   37.46    2.66
   7  -5  -8   39.25    3.34
   7  -5  -8   36.10    2.32
  -7  -5   8   39.25    2.24
  -7  -5   7  295.40    7.63
   7  -5  -7  278.38    9.27
  -7   5   7  273.01    8.01
  -7  -5   7  277.51    7.51
  -7   5   7  274.46    8.05
   7  -5  -7  269.03    7.76
   7  -5  -7  271.04    9.31
   7  -5  -7  277.47    8.14
  -7  -5   6  677.89   14.77
   7  -5  -6  631.38   16.35
  -7  -5   6  644.23   14.25
  -7   5   6  662.57   14.98
  -7   5   6  632.88   14.90
   7  -5  -6  646.91   16.43
   7  -5  -6  633.42   15.13
   7  -5  -6  655.57   15.00
   7  -5  -5 2538.69   50.04
  -7   5   5 2451.02   49.71
  -7  -5   5 2396.65   47.99
  -7   5   5 2381.47   48.32
  -7   5   5 2357.86   48.32
  -7  -5   5 2367.50   47.39
  -7  -5   4 1711.51   34.25
   7  -5  -4 1901.25   36.88
  -7   5   4 1826.06   36.60
   7  -5  -4 1732.59   36.47
   7   5  -4 1841.52   33.71
  -7   5   4 1746.11   35.29
   7  -5  -4 1732.45   35.78
  -7  -5   4 1707.03   34.76
   7  -5  -3   34.43    2.33
   7  -5  -3   34.28    2.35
  -7   5   3   37.81    2.07
  -7   5   3   30.43    1.92
   7   5  -3   31.58    1.30
  -7   5   3   31.60    2.22
   7  -5  -3   32.45    2.20
  -7  -5   3   32.46    1.74
  -7  -5   3   32.05    1.46
  -7   5   2  266.26    7.11
   7  -5  -2  267.99    7.55
  -7   5   2  259.86    7.04
   7  -5  -2  269.19    7.54
  -7   5   2  264.57    7.57
  -7  -5   2  266.19    6.02
   7   5  -2  261.38    6.39
  -7  -5   2  256.75    6.55
   7  -5  -2  253.81    7.55
   7   5  -1   52.59    2.46
   7   5  -1   52.67    2.04
  -7  -5   1   53.23    2.27
   7  -5  -1   56.30    2.75
  -7   5   1   56.67    2.72
  -7  -5   1   53.41    1.94
   7  -5  -1   53.32    2.71
  -7   5   1   58.06    2.89
   7  -5  -1   57.55    3.03
   7   5   0  261.06    6.15
  -7   5   0  272.58    7.49
   7   5   0  255.63    6.78
  -7  -5   0  270.58    6.76
  -7   5   0  277.88    7.41
   7  -5   0  263.93    7.21
   7  -5   0  277.72    7.84
  -7  -5   0  263.83    6.23
  -7  -5  -1  233.87    5.88
  -7   5  -1  234.13    6.96
   7  -5   1  241.27    6.57
  -7  -5  -1  235.39    5.90
  -7  -5  -1  250.21    6.42
   7  -5   1  232.44    7.19
   7  -5   1  240.59    6.61
   7   5   1  232.47    6.16
  -7   5  -1  226.94    6.92
  -7   5  -1  245.37    7.26
   7   5   1  235.83    5.53
   7   5   2  579.32   12.48
  -7   5  -2  542.61   13.67
  -7  -5  -2  571.71   12.97
  -7   5  -2  594.51   13.90
  -7   5  -2  553.68   13.54
   7  -5   2  561.68   12.90
  -7  -5  -2  572.32   12.55
  -7  -5  -2  589.89   12.61
   7   5   2  569.93   11.85
   7  -5   2  552.21   13.77
   7  -5   2  569.68   13.02
   7  -5   3  268.82    8.06
  -7  -5  -3  281.31    7.60
  -7   5  -3  250.91    7.96
   7   5   3  274.61    6.77
   7  -5   3  264.70    7.22
   7   5   3  271.98    6.41
   7  -5   3  278.94    7.39
  -7  -5  -3  252.35    7.05
  -7   5  -3  286.37    8.11
   7  -5   4 2676.02   52.61
   7  -5   4 2777.29   52.84
  -7   5  -4 2670.51   54.16
   7  -5   4 2738.59   53.98
   7   5   4 2626.81   51.70
  -7  -5  -4 2600.38   52.68
   7   5   4 2601.41   51.90
  -7  -5  -4 2649.13   53.26
  -7   5  -4 2642.56   53.48
  -7   5  -5  433.06   11.28
   7  -5   5  435.55   11.65
  -7   5  -5  422.87   11.98
   7  -5   5  436.23   10.85
   7  -5   5  421.32   10.61
   7   5   5  446.18   10.27
   7   5   5  419.82   10.15
  -7  -5  -5  431.03   11.44
   7  -5   6  832.20   18.79
  -7  -5  -6  853.14   19.81
  -7  -5  -6  877.94   21.18
   7   5   6  826.86   18.16
   7   5   6  852.61   18.39
   7  -5   6  834.73   19.72
  -7   5  -6  849.85   19.16
   7  -5   6  807.28   18.58
   7   5   7  506.49   12.54
   7  -5   7  532.57   13.13
   7  -5   7  518.53   12.94
  -7  -5  -7  513.16   14.83
   7   5   7  547.13   12.96
  -7  -5  -7  534.36   14.15
   7  -5   7  529.66   14.05
  -7   5  -7  521.10   13.23
  -7   5  -8  300.74    8.84
   7  -5   8  298.97    9.67
   7   5   8  312.70    8.66
  -7  -5  -8  299.14   10.40
   7  -5   8  288.00    8.64
  -7  -5  -8  285.57    9.72
   7   5   8  288.36    8.72
   7  -5   9   36.54    3.07
   7   5   9   35.35    2.53
  -7  -5  -9   31.14    3.06
   7   5   9   34.18    2.60
  -7  -5  -9   35.06    3.20
  -7   5  -9   32.41    2.53
   7  -5  10  546.72   15.13
   7   5  10  547.98   14.00
  -7  -5 -10  526.37   15.71
  -7  -5 -10  495.49   15.26
   7   5  10  559.65   14.43
  -7   5 -10  507.96   13.59
   7   5  11  161.69    6.59
   7  -5  11  144.40    6.69
  -7   5 -11  144.08    5.85
   7   5  11  151.09    6.20
   7  -5  12    4.62    1.56
   7   5  12    3.24    1.19
   7   5  12    5.26    1.81
  -7   5 -12    2.54    1.10
   7  -5  13   72.77    4.84
   7   5  13   74.06    4.65
   7   5  13   76.71    4.92
   7   5  14  358.84   11.77
   7   5  14  349.29   11.99
   7  -5  14  335.52   11.84
   7  -7 -14   63.29    4.59
  -7   7  14   59.09    4.43
  -7   7  14   57.58    4.29
  -7   7  13   62.71    4.30
   7  -7 -13   57.47    3.58
  -7   7  13   60.35    4.24
   7  -7 -13   59.23    4.25
  -7  -7  12  130.98    5.31
  -7   7  12  141.40    6.42
  -7   7  12  127.45    6.07
   7  -7 -12  124.73    6.12
  -7  -7  11  123.78    5.20
   7  -7 -11  141.36    6.28
  -7   7  11  132.87    5.99
  -7   7  11  143.91    6.12
   7  -7 -11  135.13    5.58
   7  -7 -10  100.45    4.72
  -7  -7  10   97.06    4.46
   7  -7 -10  109.27    5.28
  -7   7  10  102.34    4.97
  -7   7  10  109.61    5.19
   7  -7  -9   78.84    4.12
  -7  -7   9   75.80    3.71
  -7   7   9   78.18    4.14
  -7   7   9   79.98    4.14
   7  -7  -9   79.34    4.36
  -7  -7   9   75.18    3.82
  -7  -7   8  310.63    8.77
  -7   7   8  324.10    9.54
  -7   7   8  333.42    9.60
   7  -7  -8  342.36    9.88
  -7  -7   8  319.69    9.27
  -7   7   7   17.17    1.83
   7  -7  -7   16.98    1.92
  -7  -7   7   17.16    1.73
  -7   7   7   16.20    1.86
  -7  -7   7   17.91    1.93
  -7  -7   7   17.78    1.57
  -7  -7   6    7.89    1.04
  -7   7   6    7.93    1.41
  -7  -7   6    5.68    1.11
  -7  -7   6    4.33    1.09
   7   7  -6    6.62    0.86
  -7   7   6    5.87    1.23
  -7   7   5   35.62    2.46
  -7  -7   5   43.04    2.47
   7  -7  -5   42.61    3.37
   7   7  -5   42.92    1.99
  -7   7   5   46.37    2.79
  -7   7   5   43.42    3.26
  -7  -7   5   44.26    2.19
  -7   7   4   52.79    3.54
  -7   7   4   52.42    2.96
  -7  -7   4   56.25    2.39
  -7  -7   4   53.52    2.73
   7  -7  -4   54.89    3.61
   7  -7  -4   50.65    3.52
   7  -7  -4   54.36    3.34
   7   7  -4   54.42    2.31
  -7  -7   3   16.73    1.53
   7  -7  -3   16.84    2.06
   7   7  -3   16.36    1.56
   7  -7  -3   15.36    1.96
   7  -7  -3   16.04    1.99
  -7   7   3   15.03    1.92
   7   7  -3   16.13    1.27
  -7   7   3   14.55    1.70
  -7   7   3   15.45    1.67
   7  -7  -2   78.24    4.12
   7   7  -2   81.71    3.38
  -7   7   2   83.11    4.21
   7  -7  -2   87.21    4.25
  -7   7   2   86.62    3.85
   7  -7  -2   93.68    4.32
  -7  -7   2   80.23    2.96
  -7   7   2   83.56    3.84
  -7  -7   2   76.37    3.32
   7   7  -1   87.76    3.40
   7   7  -1   89.94    3.93
  -7   7   1   99.11    4.25
  -7   7   1   88.29    4.27
   7  -7  -1   98.76    4.35
   7  -7  -1   87.90    4.09
  -7  -7   1   89.52    3.26
  -7  -7   1   90.08    3.66
   7  -7  -1   89.48    4.44
  -7   7   1   97.27    4.18
  -7   7   0 1152.68   23.59
   7   7   0 1061.68   21.72
  -7  -7   0 1068.21   21.89
  -7  -7   0 1071.21   22.51
  -7   7   0 1114.13   23.55
   7  -7   0 1136.35   23.16
   7  -7   0 1030.69   22.99
  -7   7   0 1075.25   23.43
   7   7   0 1069.00   22.81
  -7   7  -1  431.67   11.71
   7   7   1  441.45   10.91
  -7   7  -1  450.98   11.92
  -7  -7  -1  426.15   10.50
   7   7   1  444.98   10.11
   7  -7   1  425.81   11.01
  -7  -7  -1  435.33   11.08
   7  -7   1  400.59   10.99
   7  -7   1  430.15   12.01
  -7   7  -2  669.87   16.45
   7  -7   2  684.00   15.44
  -7  -7  -2  633.78   15.53
   7   7   2  639.91   14.93
  -7   7  -2  678.13   16.43
  -7  -7  -2  647.86   14.98
   7  -7   2  624.61   15.14
  -7  -7  -2  644.77   14.54
   7   7   2  672.17   14.21
   7  -7   2  660.52   16.55
   7  -7   3   19.76    2.19
  -7  -7  -3   22.34    2.05
   7  -7   3   23.11    1.94
  -7  -7  -3   24.71    1.82
  -7  -7  -3   23.43    1.95
   7   7   3   22.48    1.79
   7   7   3   19.43    1.41
  -7   7  -3   19.57    2.27
   7  -7   4  170.28    6.68
  -7  -7  -4  170.71    6.50
   7   7   4  164.66    4.93
  -7  -7  -4  175.50    5.70
   7   7   4  171.23    5.42
  -7   7  -4  166.09    6.86
   7  -7   4  158.97    5.65
  -7   7  -5   38.74    3.29
   7   7   5   41.36    2.44
  -7  -7  -5   35.96    2.97
   7   7   5   38.69    2.12
   7  -7   5   38.11    3.03
  -7  -7  -5   39.86    2.61
   7  -7   6    9.10    1.82
   7   7   6    8.45    1.14
   7   7   6    8.72    1.33
  -7   7  -6    6.03    1.59
  -7  -7  -6    8.41    1.33
  -7  -7  -6    9.92    1.81
   7   7   7    3.73    1.06
   7  -7   7    4.69    1.56
  -7  -7  -7    3.61    1.24
   7   7   7    5.73    1.21
  -7  -7  -7    3.42    1.31
   7  -7   8  748.09   19.75
  -7  -7  -8  747.28   18.48
   7   7   8  748.15   17.32
   7   7   8  749.64   17.41
  -7  -7  -9   73.58    4.32
   7  -7   9   75.28    4.87
   7   7   9   76.92    3.89
   7   7   9   75.86    3.87
  -7  -7 -10  153.67    6.78
   7   7  10  161.26    6.20
   7   7  10  162.28    6.27
   7  -7  10  159.80    7.57
   7  -7  11  129.94    6.84
   7   7  11  129.40    5.64
  -7  -7 -11  120.95    6.12
   7   7  11  129.09    5.81
   7  -7  12   37.09    3.84
  -7  -7 -12   42.15    3.64
   7   7  12   42.83    3.34
   7   7  12   49.89    3.64
   7  -7  13    2.65    1.83
   7   7  13    2.97    1.60
  -7  -9  11   25.45    2.59
   7  -9 -11   26.04    2.78
  -7   9  10    5.02    1.74
   7  -9 -10    3.07    1.55
  -7  -9  10    2.11    1.25
  -7   9  10    5.41    1.56
  -7  -9   9    9.02    1.80
  -7   9   9    7.50    1.65
  -7   9   9    6.34    1.60
   7  -9  -9    9.56    1.95
  -7  -9   8  577.45   15.43
  -7   9   8  578.87   15.27
   7  -9  -8  572.48   15.88
  -7   9   8  598.20   15.31
   7  -9  -7  148.37    6.53
  -7   9   7  126.90    5.62
  -7   9   7  140.68    5.77
  -7  -9   7  125.03    4.77
  -7   9   6   28.29    2.58
  -7   9   6   32.72    2.69
  -7  -9   6   28.29    2.71
   7  -9  -6   28.76    2.93
   7   9  -5  382.82    9.58
  -7   9   5  381.80   11.06
   7  -9  -5  407.82   12.00
  -7  -9   5  371.21   11.49
  -7  -9   5  357.63    9.57
  -7   9   5  400.04   11.06
  -7  -9   4  355.62   11.11
   7  -9  -4  376.40   11.47
  -7   9   4  358.94   10.63
   7   9  -4  336.90    9.15
  -7   9   4  395.49   10.74
  -7   9   3  131.51    5.60
  -7   9   3  132.02    5.50
   7   9  -3  120.67    5.21
  -7  -9   3  118.02    4.35
   7  -9  -3  130.62    6.04
   7  -9  -2   75.13    4.48
  -7   9   2   70.11    4.03
   7   9  -2   60.16    3.40
  -7  -9   2   68.31    3.16
  -7   9   2   69.72    3.89
  -7   9   1   71.53    4.12
   7   9  -1   76.21    3.66
  -7  -9   1   76.02    3.53
  -7   9   1   75.02    4.29
   7  -9  -1   80.87    4.74
  -7   9   0  752.72   17.94
   7   9   0  709.12   16.26
  -7   9   0  719.40   18.02
  -7  -9   0  639.95   16.14
   7  -9   0  675.17   18.19
   7   9   0  748.10   17.64
   7  -9   1  250.77    9.09
   7   9   1  262.04    8.35
  -7  -9  -1  239.99    7.65
  -7   9  -1  269.12    9.03
   7   9   1  262.26    7.42
  -7   9  -2  113.48    5.66
  -7  -9  -2  100.90    4.62
   7   9   2  105.34    4.75
   7   9   2  103.86    4.15
   7  -9   2  104.96    5.58
   7   9   3  166.42    6.15
  -7   9  -3  170.97    7.41
   7  -9   3  159.75    7.22
  -7  -9  -3  155.58    6.17
   7   9   3  166.90    5.45
   7  -9   4  227.28    8.87
  -7   9  -4  248.13    9.47
   7   9   4  221.68    7.46
   7   9   4  237.11    6.83
   7   9   5    3.68    1.20
  -7   9  -5    4.15    1.70
  -7  -9  -5    4.07    1.31
   7  -9   5    0.14    1.53
   7   9   5    3.16    0.98
   7  -9   6  173.50    7.80
   7   9   6  174.63    6.36
  -7   9  -6  167.34    8.25
   7   9   6  178.13    5.80
  -7  -9  -6  183.32    6.69
  -7  -9  -7   49.66    3.40
   7   9   7   48.32    3.11
   7  -9   7   47.68    4.09
   7   9   7   46.69    2.76
   7  -9   8   60.96    4.70
   7   9   8   62.84    3.37
   7   9   8   64.50    3.70
  -7  -9  -8   64.81    4.06
   7   9   9   68.08    3.86
  -7  -9  -9   69.92    4.32
   7   9   9   69.84    3.69
   7  -9   9   64.93    5.10
   7  -9  10  174.11    8.73
   7   9  10  179.49    6.66
  -7  -9 -10  184.09    7.71
   7   9  10  192.53    7.08
  -7  11   6   10.07    1.96
  -7 -11   6   10.66    2.23
   7 -11  -6   11.98    2.46
  -7 -11   5   61.31    4.43
   7 -11  -5   51.37    4.29
  -7  11   5   58.99    4.15
  -7  11   5   60.17    4.09
  -7  11   4  350.12   10.99
   7 -11  -4  328.22   11.78
  -7  11   4  334.71   11.08
  -7 -11   4  326.58   11.45
  -7  11   3  126.28    6.26
  -7 -11   3  124.19    6.47
   7 -11  -3  124.10    6.63
  -7  11   3  121.86    5.97
   7 -11  -2    1.30    1.68
  -7  11   2   -0.92    1.37
  -7  11   2   -0.74    1.30
   7  11  -2   -0.05    1.16
  -7 -11   2    3.13    1.62
  -7 -11   1  188.87    8.35
   7  11  -1  193.95    7.27
  -7  11   1  199.75    8.27
  -7  11   1  192.23    7.95
   7 -11  -1  198.47    8.69
  -7  11   0  211.41    8.61
  -7  11   0  213.61    8.58
   7  11   0  204.23    7.34
   7 -11   0  190.48    8.62
   7 -11   1    3.25    1.81
   7  11   1    0.73    1.40
  -7  11  -1    3.02    1.82
   7  11   1    1.56    1.04
   7 -11   2    4.57    1.89
   7  11   2    4.75    1.27
   7  11   2    5.06    1.45
  -7  11  -2    4.67    1.82
   7 -11   3  187.68    8.63
   7  11   3  177.99    6.44
  -7  11  -3  197.93    8.86
   7  11   3  178.29    7.35
   7 -11   4   57.58    4.67
  -7  11  -4   61.19    4.93
   7  11   4   51.37    3.76
  -8   0  17   -1.06    1.93
  -8   0  17   -0.33    1.88
  -8   0  16  270.35   11.05
  -8   0  16  274.05   11.41
  -8   0  15    0.30    1.48
  -8   0  15    1.04    1.56
  -8   0  14  716.82   19.66
  -8   0  14  697.49   19.82
  -8   0  13   -0.72    1.15
  -8   0  13   -0.81    1.51
  -8   0  12  183.22    7.49
  -8   0  12  176.28    7.60
  -8   0  11    0.48    1.01
  -8   0  11   -0.17    1.00
  -8   0  10  792.91   19.26
  -8   0  10  803.64   19.57
  -8   0   9    0.20    0.84
  -8   0   9   -0.12    1.04
  -8   0   8  600.91   14.67
  -8   0   8  616.99   15.03
   8   0  -7   -0.72    0.69
  -8   0   7   -0.05    0.71
  -8   0   7   -0.62    0.79
   8   0  -6  841.55   17.22
  -8   0   6  809.24   17.92
  -8   0   6  826.03   18.27
  -8   0   5    0.13    0.22
   8   0  -5    0.24    0.28
  -8   0   5    0.52    0.57
  -8   0   5    0.29    0.57
   8   0  -5    0.08    0.40
   8   0  -4 1070.92   20.58
   8   0  -4 1069.99   21.54
  -8   0   4 1031.46   21.06
  -8   0   4 1018.54   21.23
   8   0  -4 1100.11   20.60
  -8   0   4 1102.18   20.37
  -8   0   3    0.14    0.29
   8   0  -3    0.41    0.38
  -8   0   3    0.64    0.28
   8   0  -3    0.52    0.37
   8   0  -3    0.68    0.45
  -8   0   3    0.48    0.34
  -8   0   3    1.29    0.42
  -8   0   2  116.99    2.95
  -8   0   2  123.58    3.46
   8   0  -2  120.85    3.16
   8   0  -2  116.75    3.11
  -8   0   2  111.15    2.92
   8   0  -1    0.72    0.23
   8   0  -1   -0.16    0.45
  -8   0   1    0.15    0.37
  -8   0   1    0.29    0.14
   8   0  -1    0.55    0.26
  -8   0   0   37.80    1.88
   8   0   0   32.51    1.85
  -8   0   0   36.35    1.31
  -8   0   0   36.36    0.99
   8   0   0   36.23    0.98
   8   0   0   34.21    1.27
   8   0   1    0.74    0.27
  -8   0  -1    0.14    0.44
   8   0   1    1.24    0.58
  -8   0  -1    0.79    0.31
   8   0   1    0.37    0.17
   8   0   2  152.60    4.92
   8   0   2  152.02    3.91
   8   0   3    0.60    0.48
  -8   0  -3    0.06    0.55
   8   0   3    0.16    0.62
   8   0   4 1352.81   27.83
   8   0   4 1299.74   26.55
  -8   0  -4 1338.74   27.52
  -8   0  -5    0.57    0.67
   8   0   5   -0.26    0.69
   8   0   5    0.49    0.55
  -8   0  -6   13.09    1.52
   8   0   6   14.14    1.61
  -8   0  -7    1.07    0.82
   8   0   7   -0.22    0.80
   8   0   7    0.83    0.90
  -8   0  -8 2598.16   51.70
   8   0   8 2525.44   52.16
   8   0   8 2611.29   52.39
  -8   0  -9   -0.13    0.80
   8   0   9    0.54    0.91
   8   0   9   -0.37    1.00
   8   0  10   48.82    3.35
   8   0  10   44.89    3.45
  -8   0 -10   49.81    3.13
  -8   0 -11    0.15    0.86
   8   0  11    1.40    1.16
   8   0  11   -0.07    1.19
  -8   0 -12 1000.37   23.52
   8   0  12 1044.00   25.78
  -8   0 -13   -0.10    0.89
   8   0  13    1.11    1.49
  -8   0 -14   15.38    1.89
   8   0  14   15.63    2.62
   8   0  15   -0.27    2.01
   8   0  16  430.85   15.63
   8  -2 -17   -2.25    1.79
  -8   2  17    4.16    2.12
  -8   2  17    3.23    2.40
  -8  -2  17    1.11    2.42
  -8   2  16    1.74    1.55
  -8   2  16    5.08    2.15
  -8  -2  16    2.28    1.97
   8  -2 -16   -2.16    1.69
   8  -2 -15  112.75    5.81
  -8   2  15  126.33    6.78
  -8  -2  15  124.39    7.33
  -8   2  15  125.90    6.85
   8  -2 -14  590.40   16.09
  -8   2  14  608.13   17.21
  -8  -2  14  621.78   18.32
  -8   2  14  596.27   17.21
  -8   2  13   27.23    2.99
   8  -2 -13   24.53    2.49
  -8   2  13   25.95    2.79
  -8  -2  13   25.01    3.05
   8  -2 -12   -0.86    1.36
  -8   2  12    1.37    1.39
  -8   2  12   -0.17    1.11
  -8  -2  12    0.41    1.34
   8  -2 -11  141.97    3.57
  -8  -2  11  133.83    6.45
  -8   2  11  135.52    5.94
   8  -2 -11  142.13    3.36
   8  -2 -11  128.27    5.39
  -8   2  11  137.71    6.14
   8  -2 -10  655.44   13.73
   8  -2 -10  679.81   13.39
   8  -2 -10  675.94   17.75
  -8  -2  10  659.88   17.41
  -8   2  10  663.84   16.57
   8  -2 -10  646.88   15.87
  -8   2  10  649.85   16.72
   8  -2  -9   87.91    3.83
  -8  -2   9   82.75    4.50
   8  -2  -9   81.32    4.55
  -8   2   9   88.13    4.22
  -8   2   9   78.99    4.10
   8  -2  -9   87.66    2.58
  -8  -2   8  182.31    3.87
  -8   2   8  184.36    6.30
  -8  -2   8  187.78    4.04
   8  -2  -8  194.90    6.97
  -8   2   8  177.82    6.18
   8  -2  -8  180.23    4.56
   8  -2  -8  175.52    5.79
  -8  -2   7  194.31    4.71
   8  -2  -7  195.27    4.91
   8  -2  -7  196.44    5.91
   8  -2  -7  204.27    6.83
  -8   2   7  194.52    6.21
  -8   2   7  200.31    6.37
  -8  -2   7  201.21    4.44
  -8   2   6 3449.59   67.59
  -8  -2   6 3460.04   66.02
  -8   2   6 3494.68   67.52
   8  -2  -6 3534.78   68.43
   8  -2  -6 3602.98   68.29
   8  -2  -6 3404.93   66.04
   8  -2  -5   23.80    1.30
  -8   2   5   22.20    1.61
  -8  -2   5   25.47    1.39
   8  -2  -5   24.29    1.85
   8  -2  -5   23.45    1.83
  -8   2   5   22.18    1.57
   8  -2  -5   21.57    1.54
  -8   2   4  356.31    8.33
  -8  -2   4  365.47    8.31
   8  -2  -4  351.82    8.07
   8  -2  -4  343.55    8.76
  -8   2   4  361.84    8.42
  -8   2   4  353.79    8.57
   8  -2  -4  348.08    8.32
   8   2  -4  364.20    7.03
  -8   2   4  348.12    8.05
   8  -2  -4  339.51    8.80
   8  -2  -3 1049.07   21.53
  -8  -2   3 1091.12   21.57
  -8   2   3 1032.10   21.36
  -8   2   3 1056.93   21.08
  -8   2   3 1034.01   20.98
   8  -2  -3 1022.91   21.57
   8  -2  -3 1049.13   21.20
  -8   2   3 1051.79   21.12
  -8   2   2  136.65    3.96
   8  -2  -2  133.70    3.90
  -8  -2   2  135.23    4.30
  -8   2   2  135.75    3.65
  -8  -2   2  138.87    3.13
   8  -2  -2  136.89    4.06
  -8   2   2  148.64    3.94
   8  -2  -2  134.26    4.09
  -8   2   1  862.98   16.98
   8  -2  -1  798.20   17.68
  -8   2   1  835.34   17.24
  -8  -2   1  867.99   18.18
   8  -2  -1  826.04   17.11
  -8  -2   1  840.93   16.28
   8  -2  -1  855.77   17.38
  -8   2   1  894.57   17.58
  -8   2   0 2150.31   39.62
  -8   2   0 2037.09   39.87
  -8  -2   0 2104.02   40.97
   8  -2   0 2046.48   40.46
  -8   2   0 2110.87   40.19
   8  -2   0 2026.59   39.76
   8  -2   0 1982.91   39.41
   8  -2   1 1575.81   32.90
  -8   2  -1 1619.01   32.56
  -8  -2  -1 1665.80   33.48
   8  -2   1 1579.23   32.04
   8  -2   1 1636.48   31.80
  -8  -2  -1 1705.55   31.33
  -8   2  -1 1481.62   32.21
  -8   2  -1 1643.99   31.99
  -8   2  -2  166.69    5.10
   8  -2   2  192.49    4.96
  -8   2  -2  179.60    5.11
   8  -2   2  172.28    5.48
  -8  -2  -2  172.28    5.76
   8   2   2  187.11    4.17
   8  -2   2  176.30    4.56
  -8  -2  -2  180.46    4.51
   8   2   3  446.94    9.62
  -8   2  -3  454.41   10.61
   8  -2   3  451.92   10.19
   8  -2   3  429.10    9.80
   8  -2   3  447.82   11.06
  -8  -2  -3  467.43   11.47
  -8  -2  -3  455.94   10.01
  -8   2  -3  444.47   10.58
   8  -2   4 2807.34   56.07
   8  -2   4 2872.71   55.14
  -8  -2  -4 2902.05   56.63
  -8   2  -4 2743.35   55.53
  -8   2  -4 2934.65   55.53
   8   2   4 2842.82   54.73
  -8   2  -5  642.61   14.56
   8  -2   5  656.80   15.35
  -8  -2  -5  635.37   15.56
   8   2   5  625.38   14.19
   8  -2   5  655.92   14.44
  -8   2  -6    2.13    0.80
   8  -2   6    1.52    0.98
  -8  -2  -6    1.13    0.73
   8  -2   6    1.06    0.64
   8   2   6    1.57    0.74
   8   2   7    1.85    0.86
  -8   2  -7    2.21    0.86
   8  -2   7    3.12    1.08
  -8  -2  -7    1.21    0.79
   8  -2   7    1.25    0.82
   8  -2   8  671.05   16.64
  -8  -2  -8  677.01   16.92
   8  -2   8  692.58   16.21
   8   2   8  694.69   16.43
  -8   2  -8  657.28   15.66
   8  -2   9  411.40   11.42
  -8  -2  -9  414.84   11.95
   8  -2   9  435.28   12.02
   8   2   9  419.90   11.81
  -8   2  -9  421.30   10.91
   8  -2  10  136.09    5.86
   8  -2  10  128.52    5.56
  -8  -2 -10  137.60    5.96
   8   2  10  135.58    5.87
  -8   2 -10  126.97    4.95
   8  -2  11   84.79    4.63
  -8   2 -11   84.55    3.93
   8   2  11   79.32    4.65
  -8  -2 -11   82.04    4.55
  -8   2 -12  599.03   15.01
  -8  -2 -12  613.46   16.52
   8   2  12  643.88   17.34
   8  -2  12  650.46   16.80
   8  -2  13   77.14    4.64
   8  -2  13   77.07    5.51
  -8  -2 -13   67.84    4.27
  -8   2 -13   70.01    3.69
   8   2  13   74.39    4.87
   8   2  14    1.37    1.64
   8  -2  14    0.81    1.20
   8  -2  14    1.98    1.72
   8   2  15   81.53    5.63
   8  -2  15   72.52    4.67
   8  -2  15   77.08    6.09
   8   2  16  245.01   10.55
   8  -2  16  223.59   11.00
  -8   4  16    1.58    1.66
  -8  -4  16    4.11    2.31
  -8   4  16    1.33    1.62
   8  -4 -16    2.05    1.53
  -8   4  15   97.29    5.86
  -8  -4  15   96.29    6.69
  -8   4  15   93.71    5.71
   8  -4 -15  101.83    5.62
  -8  -4  14  227.60   10.32
  -8   4  14  218.15    8.92
  -8   4  14  236.77    9.25
   8  -4 -14  225.46    6.06
   8  -4 -14  243.11    8.90
  -8   4  13  155.49    6.95
   8  -4 -13  164.72    6.83
   8  -4 -13  154.73    5.47
  -8   4  13  167.41    7.25
   8  -4 -13  156.37    4.80
  -8  -4  12    1.22    0.45
   8  -4 -12    1.02    1.12
  -8   4  12   -0.91    1.42
  -8   4  12    0.69    1.14
   8  -4 -12    1.02    0.69
  -8  -4  11 1409.00   28.34
   8  -4 -11 1445.21   29.19
  -8   4  11 1440.27   31.86
  -8   4  11 1452.91   31.80
   8  -4 -11 1510.81   31.62
  -8  -4  10  579.88   12.46
  -8   4  10  586.04   14.99
   8  -4 -10  579.82   16.45
  -8   4  10  564.27   14.92
   8  -4 -10  562.63   14.60
   8  -4 -10  586.33   13.16
   8  -4  -9   45.09    2.84
  -8   4   9   38.53    2.79
   8  -4  -9   39.15    3.37
  -8  -4   9   40.13    2.69
   8  -4  -9   45.60    2.34
  -8  -4   9   41.62    1.96
  -8   4   8   68.67    3.53
   8  -4  -8   70.02    3.48
   8  -4  -8   70.57    4.20
  -8  -4   8   66.15    3.27
  -8   4   8   71.29    3.65
   8  -4  -8   68.86    2.98
  -8  -4   7  329.90    8.05
  -8   4   7  322.18    8.98
  -8  -4   7  333.40    8.57
   8  -4  -7  327.41   10.10
   8  -4  -7  319.20    9.94
   8  -4  -7  321.47    8.89
  -8   4   7  344.14    9.18
   8  -4  -7  330.99    8.41
  -8  -4   6  228.86    6.24
  -8   4   6  235.45    6.74
   8  -4  -6  225.21    7.62
  -8   4   6  237.97    6.83
   8  -4  -6  240.77    6.86
   8  -4  -6  213.79    7.50
   8  -4  -6  226.73    6.42
  -8  -4   5  490.48   10.69
   8  -4  -5  486.22   11.37
   8  -4  -5  474.34   12.37
   8  -4  -5  502.47   12.50
  -8   4   5  468.06   11.26
  -8   4   5  470.71   11.36
  -8   4   5  476.34   12.09
   8  -4  -4   30.52    2.20
  -8  -4   4   32.39    1.49
  -8   4   4   29.43    2.10
   8  -4  -4   30.71    2.22
  -8  -4   4   32.84    1.68
  -8   4   4   33.90    1.88
  -8   4   4   34.47    1.97
   8   4  -4   34.58    0.97
   8  -4  -4   31.19    2.00
  -8   4   3 2145.91   43.02
  -8  -4   3 2278.45   41.95
   8  -4  -3 2235.40   43.97
  -8  -4   3 2162.15   42.52
   8  -4  -3 2252.59   44.09
  -8   4   3 2158.71   43.89
   8  -4  -3 2248.00   43.70
   8  -4  -2  409.84    9.96
  -8   4   2  405.25   10.01
  -8  -4   2  403.44    8.91
   8  -4  -2  408.14   10.00
   8  -4  -2  404.33   10.03
  -8   4   2  403.29    9.42
  -8  -4   2  409.58    8.24
  -8   4   2  378.53    9.94
  -8  -4   1  368.92    7.89
   8   4  -1  366.82    7.33
   8  -4  -1  373.31    8.88
  -8  -4   1  346.76    7.18
  -8   4   1  384.88    8.68
   8  -4  -1  365.91    8.79
   8  -4  -1  359.09    9.10
  -8   4   1  344.80    9.01
  -8   4   0  265.05    7.37
   8   4   0  284.35    5.95
  -8  -4   0  280.04    6.30
  -8   4   0  273.00    7.28
   8  -4   0  296.83    7.45
  -8  -4   0  290.78    6.09
   8   4   0  279.93    6.71
  -8  -4   0  275.74    6.57
  -8   4   0  291.34    7.72
   8  -4   0  300.47    7.32
   8  -4   0  282.54    7.86
   8  -4   1 3161.34   63.24
  -8   4  -1 3130.01   62.63
  -8  -4  -1 3188.85   61.73
  -8   4  -1 3424.20   63.14
   8  -4   1 3339.51   62.53
  -8  -4  -1 3086.04   61.59
   8   4   1 3128.88   61.51
   8  -4   2   23.34    1.96
   8   4   2   26.26    1.32
  -8   4  -2   23.08    1.90
  -8  -4  -2   20.84    1.38
   8  -4   2   27.04    1.64
   8   4   2   20.25    0.99
  -8   4  -2   25.00    1.84
   8  -4   2   24.77    1.65
  -8   4  -3  328.66    9.06
   8  -4   3  316.47    8.09
  -8  -4  -3  328.59    8.32
   8   4   3  315.23    7.52
   8  -4   3  335.88    9.14
  -8   4  -3  337.44    8.80
   8  -4   3  355.99    8.51
   8  -4   4  679.90   16.27
  -8   4  -4  685.32   15.71
   8   4   4  715.74   14.76
  -8  -4  -4  744.99   17.46
   8  -4   4  681.72   15.15
  -8  -4  -4  696.57   15.60
  -8   4  -4  674.59   16.27
   8  -4   4  671.07   15.32
   8   4   4  673.05   14.55
   8  -4   5 1697.92   36.50
   8  -4   5 1757.40   35.50
  -8   4  -5 1712.44   36.66
   8   4   5 1698.26   34.69
  -8  -4  -5 1887.52   37.83
  -8   4  -5 1782.57   35.76
   8  -4   5 1729.68   35.20
   8   4   5 1752.22   34.99
  -8  -4  -5 1838.99   36.10
  -8   4  -6  509.70   12.43
   8  -4   6  466.56   12.12
   8   4   6  498.50   11.76
  -8  -4  -6  534.10   14.14
   8   4   6  491.46   12.06
  -8  -4  -6  528.41   12.99
   8  -4   6  513.08   12.12
   8  -4   6  480.24   13.09
   8   4   7  506.12   12.34
   8  -4   7  493.75   13.18
   8   4   7  498.56   11.96
   8  -4   7  509.83   12.13
  -8  -4  -7  519.01   14.15
  -8  -4  -7  509.76   13.14
  -8   4  -7  492.99   12.28
   8   4   8  409.50   10.72
   8  -4   8  418.08   11.89
  -8  -4  -8  425.04   12.53
  -8  -4  -8  437.79   12.00
   8   4   8  428.49   11.14
  -8   4  -8  422.30   10.80
   8   4   9  722.00   17.09
   8  -4   9  702.61   18.01
  -8   4  -9  698.96   16.57
  -8  -4  -9  671.81   18.42
   8   4   9  712.13   17.27
   8  -4  10    6.11    1.72
   8   4  10    3.50    1.07
  -8  -4 -10    3.24    1.39
   8   4  10    5.49    1.50
  -8   4 -10    5.84    1.25
   8  -4  11  128.93    6.13
   8   4  11  125.06    5.88
  -8  -4 -11  110.70    6.04
  -8   4 -11  115.34    4.91
   8   4  11  116.65    5.49
   8   4  12    6.43    1.69
   8  -4  12   10.58    2.07
   8   4  12    9.63    1.96
  -8   4 -12    9.20    1.46
   8  -4  13  366.31   12.19
   8   4  13  367.60   12.02
   8   4  13  395.34   12.66
   8   4  14   27.20    3.11
   8  -4  14   28.63    3.11
   8   4  14   33.82    3.55
   8   4  15   81.01    5.60
   8   4  15   69.85    5.02
  -8   6  15  245.22    9.70
  -8   6  15  257.73    9.95
   8  -6 -15  258.08    9.84
   8  -6 -14    3.05    1.56
  -8   6  14    3.35    1.81
  -8   6  14    1.03    1.48
   8  -6 -14    1.71    1.00
  -8   6  13  188.24    7.67
  -8   6  13  169.13    7.34
   8  -6 -13  187.35    7.63
   8  -6 -13  170.56    6.13
  -8   6  12   21.90    2.55
   8  -6 -12   22.40    2.63
  -8   6  12   18.79    2.46
  -8  -6  12   18.66    1.75
   8  -6 -12   19.76    1.92
  -8  -6  11  485.44   12.02
  -8   6  11  484.71   13.53
   8  -6 -11  497.03   13.64
  -8   6  11  493.70   13.64
   8  -6 -11  476.32   12.42
  -8  -6  10    6.66    1.40
  -8  -6  10    7.77    1.10
  -8   6  10    8.06    1.63
   8  -6 -10   10.55    1.50
  -8   6  10    6.92    1.61
   8  -6 -10    5.95    1.58
  -8  -6   9  399.28   10.62
   8  -6  -9  379.86   11.19
  -8   6   9  430.37   11.37
  -8   6   9  414.68   11.32
   8  -6  -9  396.10   10.73
  -8  -6   9  394.13   10.31
  -8  -6   8    2.22    1.08
   8  -6  -8    1.15    0.99
  -8   6   8    3.71    1.25
  -8  -6   8    2.66    1.17
   8  -6  -8    4.30    1.46
  -8   6   8    2.03    1.07
  -8  -6   8    1.02    0.89
   8  -6  -7 1282.32   27.15
  -8  -6   7 1241.09   26.69
  -8  -6   7 1273.99   26.70
   8  -6  -7 1260.64   29.15
  -8   6   7 1227.59   26.90
  -8   6   7 1248.93   26.98
  -8  -6   7 1265.62   25.97
   8  -6  -7 1261.66   29.39
  -8  -6   6  167.03    5.05
   8  -6  -6  178.62    6.14
   8  -6  -6  166.35    6.96
  -8  -6   6  178.06    5.63
  -8   6   6  179.97    5.89
  -8   6   6  169.23    5.78
   8  -6  -6  177.98    7.27
  -8  -6   5   12.13    1.11
   8   6  -5   12.96    0.88
  -8  -6   5   14.13    1.41
   8  -6  -5   10.88    1.75
   8  -6  -5   12.93    1.91
  -8   6   5   14.07    1.79
  -8   6   5   13.79    1.54
  -8   6   5   15.13    1.60
   8  -6  -5   15.56    1.79
   8  -6  -4  266.74    8.44
  -8  -6   4  242.86    6.08
   8   6  -4  250.17    5.79
  -8   6   4  236.37    7.05
   8  -6  -4  244.40    8.16
  -8   6   4  248.02    7.19
  -8   6   4  248.54    8.12
  -8  -6   4  255.20    6.79
   8  -6  -4  249.31    7.73
   8  -6  -3 2859.98   56.83
  -8   6   3 2907.07   55.73
  -8   6   3 2933.94   56.88
  -8   6   3 2661.24   55.43
   8  -6  -3 2797.96   56.79
  -8  -6   3 2876.22   54.95
  -8  -6   3 2859.80   54.09
   8  -6  -3 2898.77   56.54
  -8  -6   2  476.47   11.08
   8   6  -2  480.31   10.85
   8  -6  -2  469.74   12.32
  -8   6   2  506.55   11.90
   8  -6  -2  507.19   12.48
  -8  -6   2  482.91   10.39
  -8   6   2  464.48   11.76
   8  -6  -2  495.07   12.53
  -8   6   2  483.48   12.44
   8  -6  -1    3.73    1.33
  -8   6   1    2.49    0.96
  -8   6   1    2.33    0.92
   8   6  -1    2.82    0.70
  -8  -6   1    2.70    0.73
   8  -6  -1    2.38    0.94
   8   6  -1    3.17    0.66
   8  -6  -1    2.42    0.92
  -8  -6   1    2.62    0.64
  -8   6   1    3.74    1.15
  -8   6   0    6.29    1.09
   8  -6   0    8.46    1.26
   8   6   0    5.75    0.71
   8  -6   0    9.03    1.54
  -8   6   0    5.17    1.09
   8  -6   0    7.48    1.21
  -8  -6   0    6.12    0.78
   8   6   0    7.18    1.06
  -8  -6   0    9.16    1.13
  -8   6  -1 3201.59   66.42
   8   6   1 3146.21   65.07
   8   6   1 3504.40   64.29
  -8   6  -1 3282.47   66.38
  -8  -6  -1 3203.09   64.67
   8  -6   1 3343.71   66.89
  -8  -6  -1 3197.57   65.36
   8  -6   1 3282.43   65.72
  -8  -6  -1 3232.95   64.53
   8  -6   1 3581.35   65.88
  -8   6  -2  105.65    4.71
   8  -6   2  103.95    4.03
  -8  -6  -2  100.38    4.03
  -8   6  -2  104.55    4.50
   8   6   2  104.53    3.16
  -8  -6  -2  100.27    3.67
   8   6   2  103.53    3.73
  -8  -6  -2  101.74    3.60
   8  -6   2  111.48    4.90
   8  -6   2  104.94    4.11
   8  -6   3  350.62    9.26
  -8   6  -3  338.33   10.27
   8   6   3  358.05    8.12
   8  -6   3  358.95   10.44
  -8  -6  -3  359.09    9.67
   8   6   3  355.82    8.74
  -8  -6  -3  364.95    9.05
  -8   6  -3  347.10   10.17
   8  -6   3  352.48    9.29
   8   6   4   21.92    1.61
  -8  -6  -4   22.80    1.81
  -8   6  -4   23.46    2.41
   8  -6   4   23.06    2.34
   8  -6   4   19.52    1.74
   8   6   4   20.92    1.40
  -8   6  -4   25.64    2.32
  -8  -6  -4   21.18    2.08
   8  -6   4   20.11    1.81
   8  -6   5  286.89    9.27
  -8  -6  -5  284.36    8.93
  -8   6  -5  282.98    9.59
  -8  -6  -5  299.98    8.38
   8   6   5  289.53    7.39
  -8   6  -5  297.76    9.09
   8  -6   5  292.24    8.23
   8  -6   5  280.99    8.27
   8  -6   6    0.27    0.70
  -8  -6  -6   -0.46    0.86
  -8  -6  -6    0.53    1.23
   8  -6   6    0.84    0.87
   8   6   6    1.39    0.83
  -8  -6  -6   -0.26    0.90
   8  -6   6    1.26    1.18
  -8   6  -6    0.77    0.92
   8   6   6    1.08    0.75
  -8   6  -6   -0.80    1.51
  -8  -6  -7  666.57   17.45
   8   6   7  686.31   15.57
   8   6   7  674.53   15.44
   8  -6   7  696.11   17.70
  -8   6  -7  643.06   16.63
  -8  -6  -7  655.59   16.38
   8  -6   8   17.90    2.46
  -8  -6  -8   15.03    1.91
   8   6   8   19.10    1.90
   8   6   8   21.61    1.96
  -8  -6  -8   15.03    2.26
  -8   6  -8   16.78    1.98
   8  -6   9  954.50   23.64
   8   6   9  950.96   21.33
  -8  -6  -9  888.57   23.36
   8   6   9  966.00   21.63
   8  -6  10  219.56    8.91
   8   6  10  217.86    7.42
   8   6  10  219.03    7.69
   8  -6  11  640.88   18.28
   8   6  11  642.00   16.40
   8   6  11  651.54   16.83
   8  -6  12   43.72    3.99
   8   6  12   42.36    3.33
   8   6  12   42.84    3.47
   8   6  13  105.98    5.46
   8  -6  13   95.77    6.05
   8   6  13   98.46    5.56
   8  -8 -12   40.49    3.21
  -8   8  12   40.70    3.42
  -8   8  12   40.96    3.41
   8  -8 -12   43.71    3.76
  -8   8  11  167.12    6.85
  -8  -8  11  157.51    6.25
  -8   8  11  162.84    6.80
   8  -8 -11  162.16    6.64
  -8   8  10   16.98    2.24
  -8  -8  10   14.72    1.89
  -8   8  10   19.22    2.32
   8  -8 -10   15.71    1.99
  -8  -8   9  143.10    5.40
  -8  -8   9  153.56    6.05
   8  -8  -9  151.69    6.35
   8   8  -8   17.05    1.33
  -8   8   8   20.22    2.25
  -8   8   8   16.95    2.11
  -8  -8   8   16.79    1.71
  -8  -8   8   18.52    2.15
   8  -8  -8   15.28    2.09
  -8   8   7 1030.20   22.59
  -8  -8   7  995.01   22.71
   8   8  -7  979.28   20.22
  -8   8   7  996.65   22.54
   8  -8  -7  986.51   23.12
  -8  -8   7  951.62   21.09
  -8  -8   6   11.34    1.27
  -8   8   6   10.66    1.69
   8   8  -6   13.23    1.15
  -8  -8   6   10.95    1.74
   8  -8  -6   15.27    2.08
   8  -8  -5    4.68    1.38
  -8  -8   5    5.01    1.17
  -8  -8   5    4.44    1.29
   8   8  -5    3.22    0.70
  -8   8   5    4.24    1.24
  -8   8   5    3.71    1.21
  -8   8   4    1.81    1.08
  -8   8   4    1.66    1.06
  -8  -8   4    3.90    1.06
  -8  -8   4    1.89    0.75
   8  -8  -4    2.68    1.32
  -8  -8   3   26.03    2.00
  -8   8   3   26.22    2.31
  -8  -8   3   27.73    1.76
   8  -8  -3   27.12    2.71
  -8   8   3   27.83    2.35
   8  -8  -2    2.22    1.19
  -8  -8   2    0.91    0.77
  -8   8   2    0.15    0.86
  -8  -8   2    0.59    0.66
   8   8  -2    1.44    0.80
  -8   8   2    1.20    1.00
  -8  -8   1   14.30    1.60
   8  -8  -1   12.51    1.89
   8   8  -1   12.21    1.39
  -8  -8   1   14.23    1.36
  -8   8   1   14.62    1.81
  -8   8   0  130.08    5.47
   8   8   0  126.23    4.37
  -8   8   0  130.07    5.59
  -8  -8   0  129.58    4.99
  -8  -8   0  130.63    4.55
   8   8   0  125.03    5.07
   8   8   1  339.72    8.53
  -8   8  -1  337.30   10.25
   8   8   1  338.79    9.47
  -8  -8  -1  324.82    8.91
  -8  -8  -1  312.83    9.43
  -8   8  -1  355.59   10.53
   8  -8   1  329.30   10.50
   8   8   2   24.00    1.67
  -8   8  -2   24.46    2.58
  -8  -8  -2   20.24    2.14
   8   8   2   23.88    2.04
  -8  -8  -2   23.81    1.97
   8  -8   2   21.85    2.51
   8   8   3    6.96    1.08
   8  -8   3    7.52    1.61
  -8   8  -3    6.82    1.70
  -8  -8  -3    6.03    1.35
   8   8   3    7.39    1.31
  -8  -8  -3    8.70    1.35
  -8   8  -4   24.92    2.86
   8   8   4   23.94    2.11
   8  -8   4   30.07    2.93
  -8  -8  -4   24.12    2.03
   8   8   4   26.12    1.77
  -8  -8  -4   21.69    2.50
   8  -8   5  840.49   21.01
   8   8   5  804.97   18.33
  -8   8  -5  807.18   21.29
   8   8   5  806.31   17.51
  -8  -8  -5  841.56   18.76
   8  -8   6   26.77    2.97
  -8   8  -6   26.36    3.15
  -8  -8  -6   26.59    2.32
   8   8   6   23.74    1.81
   8   8   6   23.03    2.04
   8   8   7   20.84    1.98
   8   8   7   17.98    1.70
   8  -8   7   23.17    2.85
  -8  -8  -7   18.33    2.12
  -8  -8  -8   47.32    3.38
   8   8   8   49.23    2.85
   8  -8   8   46.25    3.97
   8   8   8   44.36    2.93
   8  -8   9  266.22   10.54
   8   8   9  280.18    8.35
  -8  -8  -9  264.63    9.32
   8   8   9  276.82    8.58
   8  -8  10   36.86    3.85
   8   8  10   39.13    2.89
  -8  -8 -10   34.98    3.17
   8   8  10   38.08    2.84
   8  -8  11  153.29    8.10
   8   8  11  160.82    6.37
   8   8  11  160.34    6.45
  -8  -8 -11  151.24    7.10
  -8  10   9   15.82    2.37
  -8  10   9   15.05    2.26
  -8 -10   9   11.89    2.11
   8 -10  -9   13.86    2.31
  -8  10   8   13.45    2.09
  -8  10   8   13.06    2.20
  -8 -10   8   13.61    2.22
   8 -10  -8   11.27    2.27
  -8  10   7   68.72    4.32
  -8  10   7   72.25    4.28
  -8 -10   7   69.87    4.46
   8 -10  -7   77.23    4.91
   8 -10  -6  133.91    6.57
  -8  10   6  135.98    6.13
  -8  10   6  138.89    6.06
  -8 -10   6  123.24    6.10
  -8 -10   5   36.35    3.29
  -8  10   5   43.02    3.42
  -8  10   5   45.44    3.42
   8 -10  -5   41.74    3.80
  -8  10   4   22.89    2.64
  -8  10   4   24.38    2.59
  -8 -10   4   22.84    2.65
   8 -10  -4   29.82    3.13
  -8  10   3  215.11    7.80
  -8  10   3  204.36    7.84
   8 -10  -3  207.39    8.49
  -8 -10   3  200.33    8.24
  -8  10   2   64.07    4.01
   8  10  -2   62.01    3.58
  -8  10   2   64.52    4.16
   8 -10  -2   64.43    4.65
   8  10  -1   55.98    3.32
  -8  10   1   64.22    4.07
  -8  10   1   60.04    4.12
   8 -10  -1   53.94    4.12
  -8  10   0  147.94    6.59
   8  10   0  143.79    5.46
  -8  10   0  136.27    6.44
   8 -10   0  144.56    7.01
   8 -10   1   28.64    3.22
  -8  10  -1   35.05    3.40
   8  10   1   31.60    2.42
   8  10   1   34.32    2.92
  -8  10  -1   32.83    3.20
   8 -10   2    8.35    2.16
   8  10   2    8.81    1.31
  -8  10  -2    8.06    2.03
   8  10   2    6.65    1.54
   8  10   3    0.84    0.88
  -8  10  -3    2.31    1.73
   8  10   3    0.80    1.19
   8 -10   3    2.13    1.60
   8 -10   4  303.20   11.24
   8  10   4  310.14    9.73
   8  10   4  306.51    8.66
   8 -10   5  225.88    9.48
   8  10   5  222.16    6.95
  -8  10  -5  241.75   10.20
   8  10   5  225.44    7.86
   8  10   6    5.78    1.34
   8 -10   6    8.14    2.34
  -8  10  -6    2.31    2.00
   8  10   6    6.45    1.48
  -8 -10  -7   34.04    3.02
   8  10   7   32.79    2.39
   8  10   7   35.39    2.88
   8 -10   7   39.98    4.06
  -9  -1  17   19.02    3.28
  -9   1  17   22.15    3.39
   9  -1 -17   18.86    2.64
  -9  -1  17   17.18    3.10
  -9   1  17   18.14    3.18
  -9   1  16   28.52    3.59
  -9  -1  16   32.89    3.87
  -9  -1  16   26.66    3.38
  -9   1  16   27.55    3.40
   9  -1 -16   21.12    2.64
  -9   1  15   18.13    2.89
  -9  -1  15   17.80    2.70
  -9   1  15   15.92    2.64
  -9  -1  15   11.45    2.52
   9  -1 -15   17.67    2.22
  -9   1  14    3.74    1.73
  -9  -1  14    3.17    1.53
  -9   1  14    6.84    1.82
  -9  -1  14    6.54    1.96
   9  -1 -14    4.41    1.35
  -9   1  13  992.08   23.82
  -9  -1  13  969.96   24.38
  -9   1  13  925.64   23.76
   9  -1 -13  931.53   22.18
  -9   1  12   36.29    3.22
   9  -1 -12   33.91    2.67
  -9   1  12   32.18    3.03
  -9  -1  12   37.18    3.57
   9  -1 -11   89.09    4.16
  -9   1  11   78.34    4.49
  -9   1  11   93.36    4.95
  -9  -1  11   88.11    4.98
  -9   1  10  117.55    5.44
  -9   1  10  124.98    5.40
  -9  -1  10  111.88    5.42
   9  -1 -10  117.28    4.64
  -9  -1   9  443.45   12.31
  -9   1   9  446.51   11.92
   9  -1  -9  452.49   11.19
  -9   1   9  443.06   12.16
   9  -1  -8   19.17    0.83
   9  -1  -8   17.80    1.54
   9  -1  -8   20.10    2.11
  -9   1   8   22.72    1.96
  -9  -1   8   22.08    2.11
  -9   1   8   25.70    2.16
   9  -1  -7  168.61    4.03
  -9   1   7  170.67    5.75
   9  -1  -7  169.80    6.04
  -9  -1   7  166.03    5.78
  -9   1   7  162.81    5.47
   9   1  -7  161.22    4.67
   9  -1  -7  169.70    5.11
   9  -1  -6  851.23   16.82
  -9  -1   6  867.99   16.45
   9   1  -6  849.31   17.10
  -9  -1   6  815.66   18.15
  -9  -1   6  822.18   18.45
   9  -1  -6  848.95   18.82
  -9   1   6  778.29   18.11
  -9   1   6  836.79   18.39
   9  -1  -6  823.72   17.56
  -9  -1   5  642.25   12.83
   9  -1  -5  619.75   13.26
   9  -1  -5  617.08   14.15
  -9  -1   5  624.13   13.61
  -9  -1   5  656.57   14.04
   9  -1  -5  636.40   14.24
  -9   1   5  615.29   13.71
   9  -1  -5  633.90   12.96
  -9   1   5  654.74   12.68
  -9   1   5  624.13   13.84
  -9   1   4  124.99    3.86
  -9   1   4  129.62    3.92
  -9  -1   4  131.69    3.74
   9  -1  -4  132.96    3.75
  -9  -1   4  130.30    3.76
   9  -1  -4  126.01    4.16
  -9  -1   4  124.90    3.92
   9  -1  -4  130.08    4.21
  -9   1   4  127.03    3.45
  -9   1   4  125.03    3.82
  -9   1   3  909.46   19.00
   9  -1  -3  970.84   19.33
  -9   1   3  943.65   18.90
  -9  -1   3  979.90   19.40
   9  -1  -3  908.91   19.28
   9   1  -3  973.03   19.38
  -9  -1   3  952.99   18.95
   9  -1  -3  929.99   19.40
  -9   1   3  980.10   18.99
  -9   1   3  908.49   18.95
  -9  -1   3  976.10   18.24
   9  -1  -2  501.17   10.82
  -9   1   2  517.29   11.10
  -9  -1   2  516.78   11.47
   9   1  -2  511.78   10.48
  -9   1   2  508.54   10.47
  -9  -1   2  514.86   10.38
   9  -1  -2  529.51   11.06
   9  -1  -2  506.67   11.37
  -9  -1   2  523.48   10.18
  -9   1   2  509.37   10.75
   9   1  -2  508.32   11.48
  -9   1   1   13.79    1.10
  -9   1   1   12.79    0.72
  -9  -1   1   12.82    1.17
   9  -1  -1   12.82    0.79
   9   1  -1   12.40    1.19
   9   1  -1   11.84    0.59
   9  -1  -1   10.97    0.85
   9  -1  -1   10.53    1.06
  -9   1   1   12.89    0.85
  -9  -1   1   12.12    0.56
  -9   1   0 2879.88   56.22
   9  -1   0 2808.30   57.20
   9   1   0 2956.38   57.52
  -9  -1   0 3173.21   57.63
  -9   1   0 3059.29   57.04
   9   1   1 1017.77   19.07
  -9   1  -1  997.88   20.60
   9  -1   1  952.07   20.81
   9  -1   1 1016.19   19.72
   9   1   1  947.32   21.05
  -9  -1  -1 1021.77   21.07
   9  -1   1  976.60   19.21
  -9   1  -2   56.12    2.58
   9  -1   2   51.10    2.73
   9  -1   2   54.89    2.11
   9   1   2   55.85    1.87
  -9  -1  -2   55.65    2.79
  -9   1  -2   49.93    2.18
   9  -1   2   52.98    1.83
   9   1   2   59.39    2.95
   9   1   2   53.25    1.76
   9   1   3   47.09    2.74
  -9   1  -3   44.51    2.41
   9  -1   3   45.94    2.06
   9  -1   3   49.83    2.77
  -9  -1  -3   43.25    2.59
   9   1   3   49.40    1.93
  -9   1  -3   43.56    2.26
   9   1   3   46.08    1.91
  -9   1  -4 1089.37   22.71
   9  -1   4 1040.78   21.80
   9  -1   4 1041.72   23.05
  -9  -1  -4 1057.31   23.09
   9   1   4 1076.53   23.28
   9   1   4 1070.77   21.75
  -9   1  -5 1081.48   22.55
  -9  -1  -5 1040.12   22.90
   9  -1   5 1006.95   22.84
   9   1   5 1013.37   21.77
   9   1   5 1077.44   23.22
   9  -1   5 1038.15   21.78
  -9   1  -6   77.00    3.54
   9  -1   6   74.09    3.76
   9  -1   6   78.47    3.40
   9   1   6   70.03    3.74
  -9  -1  -6   71.79    3.72
   9   1   6   75.07    3.41
  -9   1  -7    2.46    0.86
  -9  -1  -7    0.98    0.77
   9  -1   7    0.16    0.84
   9  -1   7    2.11    0.80
   9   1   7    0.77    0.94
   9   1   7    1.31    0.86
  -9   1  -8   56.57    3.11
  -9  -1  -8   49.10    3.20
   9  -1   8   51.29    3.31
   9   1   8   51.18    3.37
   9   1   8   53.25    3.23
   9  -1   8   56.24    3.15
  -9   1  -9 1603.61   33.17
   9  -1   9 1554.72   34.01
   9  -1   9 1544.76   33.31
   9   1   9 1532.41   33.97
   9   1   9 1545.57   33.81
  -9  -1  -9 1640.21   34.04
  -9   1 -10  496.07   12.84
  -9  -1 -10  479.11   13.42
   9  -1  10  509.05   13.88
   9  -1  10  507.31   13.45
   9  -1  10  502.00   14.38
   9   1  10  476.37   13.72
   9  -1  11  184.22    7.52
  -9   1 -11  208.26    7.04
   9  -1  11  197.79    8.31
  -9  -1 -11  208.31    7.57
   9   1  11  201.67    8.00
   9  -1  12  315.99   11.18
  -9  -1 -12  290.10    9.58
   9  -1  12  317.65   10.32
   9   1  12  297.15   10.60
  -9   1 -12  278.09    8.85
  -9   1 -13  683.86   16.92
  -9  -1 -13  658.32   17.58
   9  -1  13  728.38   18.52
   9  -1  13  689.26   19.76
   9   1  13  707.04   19.47
   9  -1  14    7.24    1.77
   9  -1  14    4.16    1.88
   9   1  14    5.10    1.96
   9  -1  15    4.62    2.46
   9   1  15    2.23    1.74
  -9  -3  17  313.69   13.33
   9  -3 -17  295.99   10.99
  -9   3  16   64.79    4.99
  -9  -3  16   57.54    5.32
  -9   3  16   53.24    4.63
   9  -3 -16   58.63    4.27
  -9  -3  15   12.50    2.72
  -9   3  15   11.32    2.43
   9  -3 -15    8.71    1.87
  -9   3  15    9.51    2.09
  -9  -3  14   36.46    3.88
  -9   3  14   33.23    3.39
  -9   3  14   20.68    2.71
   9  -3 -14   23.58    2.53
   9  -3 -13  332.48    7.46
  -9   3  13  347.54   11.24
  -9  -3  13  341.46   12.13
   9  -3 -13  323.34   10.23
  -9   3  12   18.12    2.32
   9  -3 -12   14.23    1.25
  -9  -3  12   13.54    2.37
   9  -3 -12   13.09    1.81
   9  -3 -12   12.85    0.99
   9  -3 -11    4.63    0.72
  -9   3  11    2.37    1.28
  -9  -3  11    3.00    1.50
  -9   3  11    3.67    1.41
   9  -3 -11    2.16    1.01
  -9  -3  10  368.33    7.52
  -9  -3  10  366.35    7.67
  -9   3  10  341.15   10.52
   9  -3 -10  364.33    8.48
   9  -3 -10  366.63   11.74
  -9   3  10  369.84   10.76
   9  -3 -10  361.81   10.25
  -9  -3   9 1283.18   25.40
   9  -3  -9 1239.65   29.14
  -9   3   9 1379.72   28.32
   9  -3  -9 1280.66   27.52
  -9   3   9 1280.53   28.08
   9  -3  -9 1279.58   25.79
  -9  -3   9 1293.52   24.95
  -9   3   8  556.91   13.77
   9  -3  -8  529.28   14.54
  -9   3   8  523.01   13.49
   9  -3  -8  543.06   12.13
  -9  -3   8  555.03   11.53
  -9   3   7  585.00   13.73
  -9   3   7  556.83   13.64
   9  -3  -7  567.20   14.68
   9  -3  -7  565.93   13.34
   9  -3  -7  556.70   12.54
  -9   3   6 2488.46   50.66
  -9   3   6 2466.54   50.69
   9  -3  -6 2477.01   51.76
   9  -3  -6 2519.82   50.55
   9  -3  -6 2587.25   50.01
   9  -3  -5  185.81    5.21
   9  -3  -5  172.65    5.97
  -9   3   5  176.86    5.32
  -9   3   5  179.88    5.74
   9  -3  -5  185.64    6.09
  -9   3   5  183.80    5.41
  -9   3   4  186.18    5.28
   9  -3  -4  202.65    6.09
   9  -3  -4  188.42    5.95
  -9   3   4  187.54    5.36
  -9   3   4  195.32    5.83
  -9   3   4  198.48    5.54
   9  -3  -4  190.01    5.46
   9  -3  -3  884.73   19.15
  -9   3   3  899.35   18.85
  -9  -3   3  918.75   17.75
  -9   3   3  874.52   18.65
  -9   3   3  974.93   19.28
  -9  -3   3  912.74   18.18
   9  -3  -3  966.68   19.71
   9  -3  -3  940.23   19.47
  -9   3   3  867.79   19.25
  -9  -3   2  183.38    4.43
   9  -3  -2  188.83    5.39
   9  -3  -2  202.36    5.57
   9  -3  -2  187.87    5.56
  -9  -3   2  187.53    3.88
  -9   3   2  191.07    5.00
  -9   3   2  192.52    5.24
  -9   3   2  192.18    5.41
   9  -3  -1  751.61   16.60
  -9  -3   1  754.57   14.99
  -9  -3   1  750.83   14.66
  -9   3   1  770.37   15.86
   9  -3  -1  736.49   15.97
   9  -3  -1  740.28   16.16
  -9   3   1  762.30   16.37
  -9  -3   1  782.21   17.28
  -9   3   1  800.16   16.22
  -9   3   0   45.89    2.22
  -9   3   0   45.29    2.09
   9   3   0   46.55    1.60
   9  -3   0   49.64    2.23
  -9   3   0   45.83    2.32
  -9  -3   0   47.62    2.73
  -9  -3   0   45.53    1.55
   9  -3   0   47.63    2.51
   9  -3   0   42.79    1.97
   9  -3   1 3038.18   61.23
  -9   3  -1 2979.20   60.63
  -9  -3  -1 3331.27   62.14
  -9   3  -1 3032.71   60.29
   9  -3   1 3409.04   60.18
   9  -3   1 3139.12   60.33
  -9   3  -1 3073.16   60.78
   9  -3   2  246.82    6.11
  -9   3  -2  236.00    6.76
  -9  -3  -2  246.52    5.94
   9   3   2  245.42    5.39
   9  -3   2  260.54    6.47
   9   3   2  246.45    5.42
   9  -3   2  255.18    7.26
   9  -3   3    8.82    1.03
  -9   3  -3    9.20    1.18
   9  -3   3    9.74    1.30
  -9  -3  -3   10.08    1.00
  -9   3  -3   10.52    1.31
  -9  -3  -3    7.84    1.43
   9   3   3    9.80    0.83
   9  -3   3   11.59    1.06
   9   3   3   11.03    0.91
   9  -3   4  244.73    6.53
   9  -3   4  228.09    7.21
   9  -3   4  222.30    6.09
   9   3   4  229.94    5.78
  -9   3  -4  213.09    6.85
  -9  -3  -4  227.03    7.66
   9   3   4  227.46    6.05
  -9  -3  -4  235.09    6.43
  -9   3  -4  221.33    6.61
   9   3   5  849.79   18.20
   9  -3   5  860.33   18.76
   9  -3   5  864.82   19.91
   9  -3   5  866.23   18.40
  -9  -3  -5  885.48   20.49
  -9  -3  -5  847.71   18.94
  -9   3  -5  893.71   19.12
   9   3   6  973.88   21.21
   9  -3   6 1033.29   21.73
   9  -3   6  979.47   22.66
  -9  -3  -6 1040.66   23.40
  -9   3  -6  991.17   21.71
   9  -3   7  162.74    6.43
  -9  -3  -7  172.72    6.80
   9  -3   7  170.77    5.83
  -9   3  -7  173.52    5.79
   9   3   7  168.11    5.70
   9  -3   8  238.50    7.60
   9  -3   8  243.75    8.44
  -9   3  -8  246.69    7.45
   9   3   8  250.04    7.64
  -9  -3  -8  239.68    8.59
   9  -3   9  740.37   18.17
   9  -3   9  782.80   19.31
  -9  -3  -9  747.86   19.41
   9   3   9  794.30   18.45
  -9   3  -9  768.45   17.73
   9  -3  10  105.38    5.42
  -9  -3 -10  104.65    5.55
  -9   3 -10  101.55    4.47
   9   3  10  106.25    5.05
  -9   3 -11    4.81    1.18
   9   3  11    5.43    1.47
  -9  -3 -11    2.64    1.38
   9  -3  11    2.93    1.44
   9  -3  12  892.63   21.62
  -9  -3 -12  790.30   21.17
   9   3  12  880.79   21.23
  -9   3 -12  796.37   19.31
   9   3  13  578.69   16.87
  -9   3 -13  542.22   14.35
   9   3  13  565.29   16.28
   9  -3  14   22.22    2.79
   9   3  14   16.46    2.61
   9  -3  14   23.48    3.69
   9   3  14   20.27    2.76
   9   3  15    5.41    1.98
   9   3  15    6.56    2.18
   9  -3  15    2.05    1.97
  -9   5  15    5.26    2.02
  -9  -5  15    4.99    2.28
   9  -5 -15    7.83    2.00
   9  -5 -14  157.97    5.28
   9  -5 -14  165.83    7.22
  -9   5  14  176.59    7.52
   9  -5 -13    2.29    0.92
  -9   5  13    2.52    1.55
  -9   5  13    2.33    1.34
   9  -5 -13    1.92    1.39
  -9   5  12  128.28    5.95
  -9  -5  12  130.51    4.17
  -9   5  12  135.10    6.16
   9  -5 -12  130.77    4.74
   9  -5 -12  140.81    6.15
  -9  -5  11   42.67    2.21
  -9  -5  11   45.56    3.18
  -9   5  11   45.35    3.35
  -9   5  11   47.29    3.42
   9  -5 -11   43.22    3.22
   9  -5 -11   42.26    2.55
   9  -5 -10  458.39   12.74
  -9  -5  10  487.77   12.55
  -9   5  10  505.64   13.14
   9  -5 -10  476.63   11.71
  -9   5  10  461.13   12.86
  -9  -5  10  461.80   11.07
  -9  -5   9  312.58    8.77
  -9   5   9  300.72    9.09
   9  -5  -9  289.42    9.00
  -9   5   9  301.90    9.15
  -9  -5   9  308.21    7.91
   9  -5  -9  298.24    8.35
  -9  -5   8  518.50   12.49
   9  -5  -8  503.14   14.63
   9  -5  -8  540.53   13.34
  -9   5   8  519.25   13.10
  -9  -5   8  513.89   12.15
  -9   5   8  514.99   13.11
   9  -5  -8  516.10   14.86
   9  -5  -8  523.73   12.65
  -9  -5   7  659.03   14.52
   9  -5  -7  640.33   16.93
   9  -5  -7  656.46   15.48
  -9   5   7  639.48   15.21
  -9   5   7  642.83   15.29
   9  -5  -7  653.38   17.05
   9  -5  -7  636.29   15.02
  -9  -5   6 1275.65   26.97
  -9   5   6 1337.01   28.81
   9  -5  -6 1299.55   29.25
  -9  -5   6 1330.83   26.57
  -9   5   6 1405.00   27.68
   9  -5  -6 1306.30   27.62
  -9   5   6 1283.70   27.49
   9  -5  -6 1275.24   29.19
  -9  -5   5   38.20    1.78
   9  -5  -5   37.20    2.80
  -9   5   5   31.83    2.52
  -9   5   5   32.52    2.14
  -9  -5   5   36.76    2.01
  -9   5   5   33.87    2.19
   9   5  -5   38.16    1.16
   9  -5  -5   38.66    2.46
  -9  -5   4  816.83   16.54
   9  -5  -4  832.94   19.13
   9  -5  -4  855.87   19.26
  -9   5   4  814.23   17.93
  -9   5   4  834.52   17.78
  -9  -5   4  823.04   17.22
   9  -5  -4  824.93   18.51
  -9   5   4  760.44   18.66
  -9  -5   3    3.40    0.50
   9  -5  -3    2.47    0.92
   9  -5  -3    2.67    1.02
  -9  -5   3    4.52    0.72
  -9   5   3    3.84    0.89
   9  -5  -3    1.84    0.78
  -9   5   3    2.25    0.83
  -9   5   2 1397.49   27.96
   9  -5  -2 1320.16   28.48
  -9  -5   2 1323.24   27.04
  -9   5   2 1351.80   28.07
   9  -5  -2 1396.31   28.64
  -9  -5   2 1355.00   26.24
   9  -5  -2 1323.14   28.62
   9   5  -1 1139.04   22.15
  -9  -5   1 1114.38   22.04
   9  -5  -1 1187.27   24.10
   9  -5  -1 1179.53   24.17
  -9  -5   1 1111.73   22.82
  -9   5   1 1112.41   23.73
  -9   5   1 1146.02   24.54
  -9   5   1 1114.42   23.93
   9  -5  -1 1123.70   24.48
  -9   5   0  586.93   13.89
  -9  -5   0  585.40   12.22
   9   5   0  578.77   11.91
  -9  -5   0  595.27   12.10
  -9   5   0  578.20   13.69
   9   5   0  550.60   12.82
  -9  -5   0  604.13   12.84
   9  -5   0  602.89   13.68
   9  -5   0  624.45   13.69
  -9   5   0  602.02   14.26
   9  -5   0  609.45   14.43
   9  -5   1   14.87    1.73
  -9   5  -1   13.52    1.45
  -9   5  -1   17.70    1.64
  -9  -5  -1   15.80    1.28
   9  -5   1   18.02    1.49
  -9   5  -1   12.71    1.48
   9   5   1   14.80    1.21
  -9  -5  -1   15.06    1.12
   9  -5   1   19.34    1.57
   9   5   1   16.81    0.90
  -9  -5  -2  402.66    9.73
  -9   5  -2  391.68   10.73
   9   5   2  395.21    9.16
  -9  -5  -2  380.07    9.35
   9  -5   2  395.70   10.88
  -9   5  -2  400.98   10.45
   9   5   2  397.71    8.50
   9  -5   2  408.78    9.99
  -9   5  -2  408.02   10.64
   9  -5   2  434.40    9.97
   9   5   3   28.76    1.61
   9  -5   3   29.29    2.49
  -9   5  -3   26.69    2.37
  -9   5  -3   27.49    2.17
  -9  -5  -3   29.31    1.87
   9  -5   3   29.82    1.93
   9   5   3   29.87    1.40
  -9  -5  -3   33.46    2.10
   9  -5   3   28.58    1.96
  -9  -5  -4   12.03    1.50
   9  -5   4   12.81    1.43
   9   5   4   12.89    1.17
   9  -5   4    8.92    1.60
  -9   5  -4    9.81    1.63
  -9  -5  -4   11.76    1.97
   9   5   4   14.69    1.16
   9  -5   4   13.10    1.38
  -9   5  -4    9.11    1.39
   9  -5   5  481.56   11.94
   9  -5   5  457.71   11.61
  -9   5  -5  455.79   13.14
  -9  -5  -5  505.55   14.22
   9   5   5  499.87   11.17
   9  -5   5  480.92   13.11
   9   5   5  489.96   11.15
  -9  -5  -5  478.29   12.39
   9  -5   6 1200.50   27.69
  -9  -5  -6 1235.08   28.81
   9   5   6 1233.66   25.40
   9  -5   6 1217.15   26.32
   9   5   6 1274.91   25.76
  -9  -5  -6 1199.42   27.00
   9  -5   6 1225.54   26.07
  -9   5  -6 1238.33   26.75
   9  -5   7  236.62    7.24
   9  -5   7  227.07    7.33
   9  -5   7  227.68    8.31
   9   5   7  222.06    6.70
  -9   5  -7  228.22    7.46
  -9  -5  -7  235.51    8.05
  -9  -5  -7  226.75    8.93
   9  -5   8  764.70   19.04
   9   5   8  734.97   16.80
  -9  -5  -8  677.42   18.20
   9   5   8  755.01   17.23
  -9  -5  -8  717.76   19.67
  -9   5  -8  711.69   17.40
   9  -5   9  436.13   13.37
   9   5   9  460.48   11.86
  -9  -5  -9  416.73   13.10
   9   5   9  454.73   12.17
   9   5  10   14.29    2.07
   9  -5  10   14.91    2.42
   9   5  10    8.62    1.53
   9  -5  11  101.89    5.86
   9   5  11  105.55    5.02
   9   5  11  110.51    5.39
   9   5  12  323.82   10.26
   9  -5  12  304.30   11.31
   9   5  12  321.27   10.72
   9  -5  13   27.09    3.25
   9   5  13   25.78    2.77
   9   5  13   29.41    3.15
   9   5  14  219.88    8.67
   9  -5  14  205.14    9.13
   9   5  14  211.58    8.95
  -9   7  14  425.91   13.29
  -9   7  13   33.01    3.19
  -9   7  13   28.54    3.03
   9  -7 -13   27.93    3.04
   9  -7 -13   25.37    2.44
  -9  -7  12   91.99    4.18
  -9   7  12   99.95    5.24
  -9   7  12   93.20    5.07
   9  -7 -12   95.42    5.35
   9  -7 -12   94.39    4.55
  -9   7  11   34.16    2.99
  -9   7  11   32.27    2.93
   9  -7 -11   35.65    2.75
   9  -7 -11   25.63    2.77
  -9  -7  11   28.60    2.32
  -9  -7  10  329.32    9.61
   9  -7 -10  334.49   10.60
  -9   7  10  350.40   10.44
  -9   7  10  357.26   10.54
   9  -7 -10  335.72   10.01
  -9  -7  10  330.24    9.53
  -9  -7   9  157.44    5.60
   9  -7  -9  163.83    6.26
  -9   7   9  162.00    6.29
  -9   7   9  159.39    6.27
  -9  -7   9  163.24    5.85
  -9  -7   8   74.15    3.39
  -9   7   8   75.36    3.96
  -9  -7   8   73.05    3.71
  -9   7   8   81.76    4.11
   9  -7  -8   80.70    4.14
  -9  -7   7  433.54   10.61
  -9   7   7  457.34   11.80
  -9  -7   7  413.29   11.13
   9   7  -7  441.25    9.49
  -9  -7   7  437.98   11.68
   9  -7  -7  453.24   12.18
  -9   7   6  371.63   10.11
   9   7  -6  370.19    8.13
  -9   7   6  370.00   10.12
  -9  -7   6  363.79    9.66
   9  -7  -6  372.07   10.68
  -9  -7   6  358.96    8.94
  -9   7   5  185.38    6.12
  -9  -7   5  161.62    5.49
   9   7  -5  173.59    4.50
  -9   7   5  190.74    6.23
  -9  -7   5  170.94    5.00
   9  -7  -5  187.93    6.71
   9  -7  -4  110.03    5.04
  -9   7   4  111.92    4.48
  -9  -7   4  104.28    4.02
   9  -7  -4  108.26    5.30
  -9   7   4  103.00    5.14
  -9  -7   4  111.10    3.51
  -9   7   4  107.69    4.48
   9  -7  -4  104.27    5.31
   9  -7  -3    6.93    1.46
  -9   7   3    7.31    1.20
   9  -7  -3    5.31    1.31
  -9   7   3    5.90    1.30
  -9  -7   3    6.07    1.00
   9  -7  -3    6.84    1.45
  -9   7   3    5.30    1.25
  -9  -7   2  342.45    8.97
   9  -7  -2  362.27   10.50
  -9   7   2  354.92   10.40
   9   7  -2  350.60    8.71
   9  -7  -2  363.93   10.44
   9  -7  -2  367.20   10.41
  -9  -7   2  349.10    8.26
  -9   7   2  383.44    9.99
  -9   7   2  348.32    9.80
  -9   7   1  251.40    7.92
  -9   7   1  269.67    8.04
   9   7  -1  243.48    6.55
  -9   7   1  266.31    8.30
   9  -7  -1  268.56    8.19
  -9  -7   1  257.10    6.56
   9  -7  -1  262.52    8.03
  -9  -7   1  250.13    7.13
   9  -7  -1  256.95    8.55
   9   7   0   55.52    2.36
  -9   7   0   56.39    3.33
   9   7   0   56.85    2.98
   9  -7   0   58.65    3.21
  -9  -7   0   51.02    2.42
  -9  -7   0   59.30    2.96
  -9   7   0   62.60    3.52
   9  -7   0   54.43    3.58
   9  -7   0   61.39    3.30
  -9   7   0   60.61    3.48
   9   7   1  134.94    4.04
  -9   7  -1  142.87    5.68
  -9  -7  -1  131.15    4.89
   9  -7   1  128.60    4.98
  -9  -7  -1  128.51    4.31
   9   7   1  130.57    4.75
  -9   7  -1  140.43    5.57
   9  -7   1  131.68    5.77
   9  -7   2  598.20   15.55
  -9   7  -2  598.73   15.35
  -9  -7  -2  545.27   14.12
   9  -7   2  559.22   14.04
   9  -7   2  570.87   14.00
  -9  -7  -2  584.95   13.21
   9   7   2  623.34   12.77
   9   7   2  581.27   13.65
   9  -7   3  397.68   11.87
  -9  -7  -3  414.33   10.13
   9   7   3  397.41   10.08
  -9   7  -3  391.40   11.88
   9   7   3  412.42    9.28
  -9  -7  -3  389.68   11.00
   9  -7   4  142.61    6.24
   9   7   4  132.52    4.11
  -9   7  -4  129.44    6.19
   9   7   4  132.14    4.63
  -9  -7  -4  133.21    4.89
  -9  -7  -4  128.89    5.55
  -9  -7  -5    1.73    1.06
   9   7   5    3.79    1.03
  -9   7  -5    5.00    1.47
   9   7   5    4.14    0.89
  -9  -7  -5    1.71    0.88
   9  -7   5    3.87    1.59
   9  -7   6  616.54   16.77
  -9   7  -6  599.42   17.22
  -9  -7  -6  620.10   15.20
  -9  -7  -6  583.47   16.23
   9   7   6  620.67   13.83
   9   7   6  603.36   14.14
   9  -7   7   43.39    3.62
   9   7   7   46.85    2.74
  -9  -7  -7   46.48    3.14
  -9  -7  -7   42.47    3.50
   9   7   7   47.07    2.64
   9   7   8  141.74    5.26
   9   7   8  137.64    5.10
   9  -7   8  141.57    6.92
  -9  -7  -8  130.60    5.79
   9  -7   9  134.71    7.00
  -9  -7  -9  144.73    6.26
   9   7   9  136.98    5.42
   9   7   9  140.14    5.42
   9  -7  10  538.54   16.82
   9   7  10  574.17   14.59
   9   7  10  547.62   14.26
  -9  -7 -10  586.82   15.93
   9  -7  11   11.21    2.36
   9   7  11   10.10    1.85
  -9  -7 -11    7.00    1.95
   9   7  11    8.64    1.74
   9  -7  12  123.85    7.28
   9   7  12  129.88    5.82
  -9  -7 -12  130.37    6.66
  -9  -9  11    0.57    1.05
  -9   9  11    2.76    1.76
  -9   9  11    2.04    1.63
   9  -9 -11    1.93    1.40
   9  -9 -10  528.76   14.82
  -9   9  10  527.02   14.62
  -9  -9  10  494.07   14.07
  -9   9  10  524.58   14.56
  -9   9   9  102.22    5.22
  -9   9   9  112.13    5.38
  -9  -9   9  106.29    5.22
   9  -9  -9  102.13    5.48
  -9   9   8   16.01    2.19
  -9   9   8   16.93    2.16
  -9  -9   8   14.12    2.03
   9  -9  -8   14.64    2.22
  -9  -9   7    9.25    1.76
  -9   9   7    7.92    1.58
   9  -9  -7   10.32    2.00
  -9   9   6  280.64    9.05
   9  -9  -6  292.91    9.97
  -9  -9   6  270.26    7.57
  -9   9   6  297.34    9.12
  -9  -9   6  274.47    9.37
  -9  -9   5   83.44    3.39
  -9   9   5   91.39    4.57
  -9  -9   5   76.16    4.53
  -9   9   5   83.18    4.44
   9  -9  -5   84.83    4.96
   9  -9  -4    3.62    1.53
  -9   9   4    3.41    1.38
  -9  -9   4    2.42    0.82
  -9   9   4    2.19    1.37
  -9   9   3   82.24    4.39
  -9  -9   3   76.30    3.26
   9  -9  -3   73.75    4.78
  -9   9   3   82.66    4.35
  -9   9   2  476.73   12.87
  -9   9   2  474.75   12.92
   9   9  -2  446.71   11.59
   9  -9  -2  448.52   13.44
  -9  -9   2  442.08   11.08
  -9   9   1  239.04    8.10
   9   9  -1  190.11    6.34
  -9  -9   1  197.04    6.24
  -9   9   1  221.67    7.88
   9  -9  -1  212.81    8.28
   9  -9   0   21.03    2.59
  -9   9   0   24.68    2.57
   9   9   0   19.47    2.15
  -9   9   0   25.89    2.66
  -9  -9   0   24.78    2.31
  -9  -9   0   20.80    1.82
   9   9   0   22.82    1.86
   9   9   1   56.34    2.82
  -9   9  -1   61.45    4.08
  -9  -9  -1   43.29    3.19
   9   9   1   63.64    3.63
  -9  -9  -1   51.37    2.95
  -9   9  -1   54.97    3.87
   9  -9   1   55.24    4.06
  -9   9  -2  946.78   22.37
   9  -9   2  886.57   22.21
   9   9   2  882.39   20.30
   9   9   2  892.77   19.04
   9  -9   3    7.42    1.96
   9   9   3    6.06    1.02
  -9   9  -3    5.82    1.97
   9   9   3    6.91    1.49
   9  -9   4   82.76    5.22
  -9   9  -4   90.96    5.59
   9   9   4   96.12    4.37
   9   9   4   87.46    3.58
  -9   9  -5  100.15    6.08
   9  -9   5   93.03    5.65
   9   9   5   92.72    4.33
  -9  -9  -5  101.38    4.59
   9   9   5   90.56    3.76
  -9   9  -6   54.70    4.62
   9   9   6   57.23    3.33
  -9  -9  -6   52.92    3.46
   9  -9   6   59.78    4.61
   9  -9   7    9.33    2.33
  -9  -9  -7   10.26    1.84
   9   9   7    8.80    1.31
   9   9   7    8.49    1.48
  -9  -9  -8  251.93    8.74
   9   9   8  246.15    7.98
   9   9   8  239.18    7.37
   9  -9   8  237.87   10.24
  -9  -9  -9  103.39    5.44
   9  -9   9  106.33    6.74
   9   9   9  105.68    4.54
   9   9   9  106.25    4.93
  -9 -11   5  227.14    9.25
   9 -11  -5  253.97    9.97
  -9  11   5  252.62    9.29
  -9  11   5  234.81    8.85
  -9  11   4   12.91    2.11
   9 -11  -4   14.99    2.59
  -9  11   4   14.68    2.39
  -9 -11   4   14.54    2.48
   9 -11  -3   21.62    2.99
  -9  11   3   25.27    2.87
  -9  11   3   20.83    2.82
  -9 -11   3   23.64    3.01
   9 -11  -2  175.42    8.21
  -9  11   2  188.49    7.76
  -9 -11   2  164.86    7.76
  -9  11   2  179.32    7.78
   9 -11  -1   18.50    2.74
  -9  11   1   15.38    2.45
  -9  11   1   17.57    2.57
   9 -11   0   28.28    3.36
  -9  11   0   26.96    3.13
  -9  11   0   17.93    2.60
   9 -11   1   15.45    2.64
  -9  11  -1   13.75    2.48
   9  11   1   10.29    1.93
  -9  11  -2   89.58    5.75
   9  11   2   96.21    5.16
   9 -11   2   92.04    5.98
   9 -11   3  167.79    8.39
  -9  11  -3  174.94    8.52
   9  11   3  193.55    7.56
 -10   0  17   -0.16    1.70
  10   0 -17   -1.37    1.55
 -10   0  17    0.81    1.77
 -10   0  16 1038.34   26.70
 -10   0  16 1016.02   27.06
  10   0 -16 1001.87   24.43
 -10   0  15   -0.53    1.66
  10   0 -15    1.01    1.08
 -10   0  15   -0.26    1.53
  10   0 -14   84.50    4.49
 -10   0  14   89.10    5.42
 -10   0  14   98.22    5.83
 -10   0  13    0.01    1.26
  10   0 -13   -0.68    1.25
 -10   0  13    0.21    1.23
 -10   0  12  212.78    8.13
 -10   0  12  215.19    8.49
  10   0 -12  212.80    7.15
 -10   0  11    1.67    1.19
  10   0 -11    0.70    0.85
 -10   0  11   -0.54    1.27
 -10   0  10   27.66    2.43
 -10   0  10   24.42    2.41
  10   0 -10   27.95    2.04
  10   0  -9   -0.65    0.81
 -10   0   9   -0.54    0.85
 -10   0   9   -0.42    0.95
 -10   0   8 2433.53   49.06
 -10   0   8 2470.51   49.52
  10   0  -8 2480.89   48.01
 -10   0   7   -0.45    0.66
  10   0  -7    0.24    0.52
 -10   0   7   -0.13    0.80
 -10   0   6 4067.35   77.77
  10   0  -6 3856.85   76.45
 -10   0   5    0.37    0.33
  10   0  -5    0.14    0.40
 -10   0   5   -0.44    0.67
  10   0  -5    0.45    0.46
 -10   0   5    0.17    0.55
  10   0  -4 4200.24   81.89
 -10   0   4 4441.08   82.12
  10   0  -4 4285.54   82.34
  10   0  -4 4042.90   82.24
 -10   0   4 4641.29   82.02
 -10   0   3    0.56    0.51
 -10   0   3    1.01    0.45
  10   0  -3    0.73    0.56
  10   0  -3    0.71    0.52
  10   0  -3    0.69    0.45
 -10   0   3    1.31    0.43
 -10   0   3   -0.06    0.34
 -10   0   2   19.52    1.37
  10   0  -2   21.05    1.48
 -10   0   2   21.25    0.92
  10   0  -2   20.80    1.14
  10   0  -2   23.41    1.13
 -10   0   1    0.51    0.30
  10   0  -1    0.84    0.25
 -10   0   1    0.42    0.54
  10   0  -1    0.15    0.60
  10   0  -1   -0.01    0.28
 -10   0   0 4012.10   76.16
  10   0   0 3925.04   76.35
 -10   0  -1   -0.07    0.57
  10   0   1    0.17    0.70
 -10   0  -1    0.24    0.40
  10   0   1    0.53    0.21
  10   0   2  419.50    8.98
  10   0   2  391.22   10.47
 -10   0  -2  411.31   10.35
 -10   0  -3    0.75    0.77
  10   0   3    0.31    0.48
  10   0   3   -0.29    0.85
 -10   0  -4  655.46   15.27
  10   0   4  641.66   13.99
  10   0   4  647.07   15.54
 -10   0  -5    0.77    0.91
  10   0   5   -0.67    0.85
  10   0   5    0.09    0.50
 -10   0  -6  622.44   15.03
  10   0   6  642.35   15.54
  10   0   6  594.67   14.09
 -10   0  -7    2.44    1.15
  10   0   7    0.07    0.84
  10   0   7    0.05    0.67
  10   0   7    1.68    0.95
 -10   0  -8  737.17   17.67
  10   0   8  763.10   18.34
  10   0   8  724.28   17.16
  10   0   8  701.91   17.60
 -10   0  -9   -0.78    0.92
  10   0   9    0.61    0.93
  10   0   9    0.37    1.04
  10   0   9    0.43    1.05
 -10   0 -10 2510.06   52.34
  10   0  10 2617.50   53.38
  10   0  10 2538.24   52.45
  10   0  10 2621.81   53.48
 -10   0 -11   -1.07    1.07
  10   0  11    0.46    1.17
  10   0  11   -0.22    1.20
  10   0  12  247.88    9.01
  10   0  12  244.88    9.46
 -10   0 -13   -0.41    0.94
  10   0  13    2.58    1.96
  10   0  14  152.49    7.87
  10   0  15    0.01    1.73
  10  -2 -17  241.44    9.58
 -10  -2  17  271.61   11.58
 -10   2  17  249.09   10.64
 -10  -2  17  265.09   11.80
 -10   2  17  267.70   11.09
 -10   2  16  395.20   13.96
 -10  -2  16  424.13   14.74
 -10   2  16  416.23   14.10
 -10  -2  16  444.57   15.56
  10  -2 -16  411.53   12.97
 -10   2  15    8.26    2.28
  10  -2 -15    6.64    1.66
 -10   2  15   10.58    2.29
 -10  -2  15    9.16    2.48
  10  -2 -14   43.75    3.39
 -10   2  14   44.50    3.76
 -10  -2  14   46.65    4.26
 -10   2  14   42.57    3.89
 -10  -2  13  129.02    6.76
 -10   2  13  128.13    6.22
  10  -2 -13  130.59    5.66
 -10   2  13  122.97    6.27
 -10  -2  12  801.80   20.83
 -10   2  12  759.20   19.55
  10  -2 -12  797.58   18.88
 -10   2  12  762.49   19.81
  10  -2 -11  195.75    6.79
  10  -2 -11  191.21    4.32
  10  -2 -11  196.85    4.23
 -10  -2  11  197.36    7.92
 -10   2  11  194.17    7.34
 -10   2  11  184.98    7.30
  10  -2 -10  511.77   13.04
  10  -2 -10  528.71   10.83
  10  -2 -10  508.97   14.81
 -10  -2  10  513.61   14.51
 -10   2  10  537.96   13.93
 -10   2  10  527.18   14.01
 -10  -2   9   34.88    2.80
  10  -2  -9   35.69    2.97
  10  -2  -9   25.34    1.32
  10  -2  -9   32.39    2.23
 -10   2   9   31.59    2.54
  10  -2  -8 2035.84   39.88
 -10  -2   8 2075.00   39.24
  10  -2  -8 2065.06   41.38
 -10   2   8 2072.10   42.19
 -10  -2   8 2012.26   42.69
  10  -2  -8 2115.51   43.26
 -10   2   8 2102.06   42.15
 -10  -2   8 2055.31   39.01
 -10  -2   7  601.93   12.37
  10  -2  -7  581.99   13.48
  10   2  -7  584.89   12.45
 -10  -2   7  595.74   14.53
  10  -2  -7  577.27   14.70
 -10   2   7  582.75   14.02
 -10   2   7  601.40   13.97
  10  -2  -7  590.34   12.55
 -10   2   6  229.60    6.74
  10  -2  -6  237.90    6.05
  10  -2  -6  243.49    7.40
 -10   2   6  252.61    6.90
  10  -2  -6  241.78    7.46
  10   2  -6  245.30    5.51
 -10  -2   6  237.14    6.01
  10  -2  -6  234.98    6.51
  10  -2  -5   19.02    1.32
 -10   2   5   17.49    1.43
 -10  -2   5   16.56    1.26
  10  -2  -5   19.11    1.66
 -10   2   5   18.17    1.45
  10  -2  -5   16.42    1.56
 -10   2   5   15.34    1.39
  10   2  -5   17.89    0.80
 -10   2   5   20.54    1.26
  10  -2  -4 3569.21   72.59
 -10   2   4 3843.31   72.38
  10  -2  -4 4002.35   73.43
 -10  -2   4 3845.83   72.95
 -10   2   4 3687.08   72.47
 -10  -2   4 4083.65   72.28
 -10   2   4 3617.08   72.54
 -10   2   4 3849.02   72.96
  10  -2  -3  740.56   15.89
  10  -2  -3  724.42   15.88
 -10   2   3  727.79   15.52
 -10  -2   3  752.03   14.78
 -10   2   3  721.47   15.24
 -10   2   3  720.62   15.73
 -10   2   3  744.14   15.61
 -10  -2   3  757.66   16.24
  10  -2  -2 3301.29   65.53
  10  -2  -2 3351.32   64.93
 -10  -2   2 3208.09   65.78
  10  -2  -2 3411.25   65.23
 -10   2   2 3406.59   64.88
 -10   2   1  222.14    5.88
  10  -2  -1  201.28    6.07
  10  -2  -1  208.24    5.58
 -10  -2   1  212.72    6.45
 -10   2   1  207.72    5.19
  10  -2  -1  228.11    5.45
 -10  -2   1  215.33    4.38
 -10   2   1  221.46    5.62
 -10   2   0   92.02    3.37
  10  -2   0  103.02    3.22
 -10   2   0   80.35    3.03
 -10   2   0   85.32    2.82
 -10  -2   0   99.54    3.95
  10  -2   0   86.45    3.60
  10  -2   0   95.30    2.86
 -10   2  -1 1333.93   27.37
  10   2   1 1326.15   25.44
 -10  -2  -1 1347.16   28.34
 -10  -2  -1 1382.69   25.61
  10  -2   1 1344.78   27.96
 -10   2  -1 1279.34   26.44
  10  -2   1 1429.71   26.42
 -10   2  -1 1299.26   26.99
  10  -2   1 1386.61   26.79
 -10   2  -2  633.20   13.98
  10  -2   2  640.20   14.63
 -10   2  -2  610.93   13.64
  10   2   2  623.14   12.11
 -10  -2  -2  575.98   14.58
  10   2   2  621.93   12.37
  10  -2   2  588.97   12.78
  10  -2   2  617.95   13.26
  10  -2   3  401.28    8.94
 -10   2  -3  426.85   10.05
  10  -2   3  396.73    9.32
  10  -2   3  403.46   10.50
 -10  -2  -3  396.92   10.71
 -10   2  -3  396.03    9.75
 -10   2  -4 1472.12   29.90
  10  -2   4 1487.77   29.27
  10  -2   4 1416.28   30.59
 -10  -2  -4 1430.34   30.92
 -10   2  -4 1403.93   29.81
  10  -2   4 1417.50   28.70
  10   2   4 1474.00   28.72
 -10   2  -5  326.93    8.66
  10  -2   5  299.25    8.14
  10  -2   5  309.68    9.27
 -10  -2  -5  316.55    9.50
  10   2   5  316.48    7.99
 -10   2  -6   96.38    4.03
  10  -2   6   89.90    3.77
  10  -2   6   89.46    4.42
  10   2   6   89.43    3.68
 -10  -2  -6   96.47    4.60
 -10   2  -7  286.78    8.31
  10  -2   7  270.42    8.92
  10  -2   7  287.79    8.15
 -10  -2  -7  282.72    9.15
  10   2   7  279.42    8.12
 -10   2  -8  209.80    6.83
 -10  -2  -8  202.90    7.58
  10  -2   8  208.30    7.59
  10  -2   8  201.86    6.75
  10   2   8  196.51    6.83
 -10  -2  -9  108.34    5.35
  10  -2   9  102.33    5.19
  10  -2   9  109.89    4.87
 -10   2  -9  110.81    4.72
  10   2   9  105.23    4.92
 -10   2 -10  357.39   10.34
  10  -2  10  371.17   11.53
 -10  -2 -10  379.00   11.56
  10   2  10  365.04   11.10
 -10  -2 -11   66.50    4.33
 -10   2 -11   69.15    3.74
  10  -2  11   74.90    4.63
  10   2  11   69.58    4.32
 -10   2 -12    8.15    1.50
 -10  -2 -12    8.44    1.80
  10   2  12   10.02    2.05
  10  -2  12    8.76    1.96
  10   2  13  235.49    9.23
  10  -2  13  242.77    9.23
  10  -2  13  256.13   10.46
  10   2  14  314.87   11.45
  10  -2  14  308.12   12.33
  10  -2  14  296.84   10.91
  10  -2  15   59.14    4.48
  10  -2  15   56.55    5.22
  10   2  15   62.40    4.96
  10  -4 -16    4.35    1.70
 -10   4  16    5.12    1.97
 -10  -4  16    8.30    2.88
 -10   4  16    1.73    1.66
 -10   4  15   78.42    5.10
 -10  -4  15   93.05    6.55
 -10   4  15   85.11    5.39
  10  -4 -15   87.26    5.09
 -10   4  14   34.67    3.21
 -10  -4  14   31.33    3.79
 -10   4  14   36.58    3.46
  10  -4 -14   41.94    3.40
  10  -4 -13  270.82    7.17
  10  -4 -13  293.32    9.57
 -10   4  13  285.28    9.92
  10  -4 -13  270.18    7.68
 -10  -4  13  307.14   11.61
 -10   4  13  292.71   10.06
 -10   4  12  175.07    7.18
  10  -4 -12  174.30    5.21
  10  -4 -12  189.68    6.99
 -10  -4  11  590.37   12.67
 -10   4  11  633.26   16.13
  10  -4 -11  605.11   15.58
 -10  -4  11  635.88   13.20
 -10   4  11  632.24   16.19
  10  -4 -11  625.12   13.79
 -10   4  10   93.08    4.53
 -10   4  10   88.76    4.54
  10  -4 -10   84.94    3.40
  10  -4 -10   96.01    4.51
 -10  -4  10   87.91    2.91
 -10  -4   9  578.86   12.38
 -10   4   9  593.54   14.47
  10  -4  -9  571.76   15.95
 -10   4   9  565.22   14.43
  10  -4  -9  576.77   14.24
  10  -4  -9  543.48   12.97
 -10  -4   8  953.30   19.92
 -10   4   8  952.11   21.49
 -10  -4   8 1004.85   21.06
  10  -4  -8  966.63   23.04
  10  -4  -8  950.94   21.32
 -10   4   8  961.52   21.53
  10  -4  -8  956.47   23.18
  10  -4  -8  964.43   20.50
  10  -4  -7  239.55    6.88
  10  -4  -7  244.09    8.45
 -10  -4   7  252.04    6.93
 -10   4   7  246.14    7.31
  10  -4  -7  256.78    8.62
 -10   4   7  241.76    7.33
  10  -4  -7  250.68    7.40
 -10   4   6    2.03    0.81
 -10  -4   6    1.70    0.60
  10  -4  -6    1.79    0.77
  10  -4  -6    3.85    1.18
 -10   4   6    2.80    0.88
 -10   4   6    2.99    0.95
 -10  -4   5  105.57    3.22
  10  -4  -5  109.10    4.61
 -10   4   5   98.77    3.68
 -10   4   5  104.99    3.91
 -10   4   5  104.58    4.33
  10  -4  -5  100.72    3.85
  10  -4  -4  282.18    8.34
 -10  -4   4  296.35    6.51
  10  -4  -4  282.22    7.86
 -10  -4   4  280.92    6.98
 -10   4   4  302.32    8.29
  10  -4  -4  289.18    8.46
 -10   4   4  290.59    7.63
 -10   4   4  292.81    7.48
 -10  -4   3  210.70    4.67
  10  -4  -3  209.00    6.47
  10  -4  -3  221.20    6.54
 -10  -4   3  213.77    5.30
  10  -4  -3  210.69    6.60
 -10   4   3  217.78    6.49
 -10   4   3  203.27    5.96
 -10   4   3  213.02    5.83
 -10   4   3  218.16    6.40
 -10   4   2   85.56    3.22
  10  -4  -2   97.15    3.73
 -10  -4   2   93.59    2.83
  10  -4  -2   95.61    3.83
  10  -4  -2   84.56    3.68
 -10  -4   2   91.11    2.13
 -10   4   2   93.01    3.73
 -10   4   2   93.00    3.47
 -10   4   2   87.54    3.65
 -10  -4   1 1340.01   26.51
  10  -4  -1 1302.30   28.37
  10  -4  -1 1350.31   27.75
 -10   4   1 1379.22   27.61
  10  -4  -1 1364.67   28.00
 -10  -4   1 1374.94   25.94
 -10   4   1 1392.93   28.23
 -10   4   1 1370.90   27.90
  10  -4   0   50.88    2.89
 -10   4   0   49.01    2.57
 -10   4   0   51.74    2.49
 -10  -4   0   50.48    1.94
  10   4   0   49.24    1.95
 -10  -4   0   50.92    1.82
  10  -4   0   51.52    2.56
 -10   4   0   52.69    2.70
  10  -4   1  349.55    9.72
 -10   4  -1  358.08    9.40
  10  -4   1  389.31    8.88
 -10   4  -1  349.57    9.06
  10   4   1  363.42    7.18
 -10  -4  -1  345.98   10.32
  10   4   1  344.15    7.93
 -10   4  -1  366.98    9.45
 -10  -4  -1  357.93    8.19
  10  -4   2  419.17   11.11
 -10   4  -2  439.43   10.90
  10   4   2  433.71    9.04
  10  -4   2  441.05    9.95
 -10  -4  -2  458.48   12.05
 -10  -4  -2  422.71    9.60
  10   4   2  433.26    8.54
 -10   4  -2  352.65   10.18
  10  -4   3  293.57    9.03
 -10   4  -3  302.57    8.86
 -10  -4  -3  276.79    9.43
  10   4   3  320.23    7.10
 -10  -4  -3  317.71    7.96
  10   4   3  301.10    7.13
  10  -4   3  336.53    8.01
 -10   4  -3  310.41    8.59
  10  -4   3  305.23    8.15
  10  -4   4   52.04    2.67
  10  -4   4   49.63    2.45
 -10   4  -4   47.93    3.03
 -10  -4  -4   48.41    3.40
  10   4   4   47.77    2.13
  10  -4   4   53.98    3.28
  10   4   4   50.36    2.10
 -10  -4  -4   49.30    2.59
 -10   4  -4   47.28    2.77
  10  -4   5  128.35    4.63
 -10  -4  -5  124.76    5.82
  10  -4   5  117.72    5.29
  10   4   5  118.71    3.91
  10   4   5  124.05    4.19
 -10  -4  -5  124.29    4.69
 -10   4  -5  118.19    5.19
  10  -4   5  132.14    4.50
 -10   4  -5  118.29    4.72
  10  -4   6  428.09   12.27
  10  -4   6  424.74   10.79
 -10  -4  -6  448.97   13.11
 -10   4  -6  432.89   11.35
 -10  -4  -6  439.36   11.53
  10   4   6  434.60   10.80
  10   4   6  440.76   10.47
  10  -4   6  436.39   11.13
  10  -4   7  445.06   11.74
  10   4   7  458.34   11.17
 -10  -4  -7  467.45   13.66
 -10  -4  -7  449.88   12.25
  10   4   7  461.37   11.63
  10  -4   7  437.85   12.90
  10  -4   7  446.54   11.39
 -10   4  -7  456.46   11.86
  10  -4   8   69.75    4.34
 -10  -4  -8   71.35    4.59
  10   4   8   75.55    3.85
  10   4   8   73.97    3.53
  10  -4   8   73.31    3.62
 -10   4  -8   68.52    3.65
 -10   4  -9  444.69   12.13
 -10  -4  -9  453.30   14.02
  10   4   9  443.94   12.06
  10   4   9  465.84   12.63
 -10   4 -10    3.08    1.12
  10  -4  10    4.29    1.60
  10   4  10    1.40    1.00
  10   4  10    2.46    1.25
  10   4  11  181.64    7.04
  10  -4  11  188.59    8.08
 -10   4 -11  171.81    6.57
  10   4  12   -0.78    1.47
  10  -4  12   -0.52    1.31
  10   4  12    0.32    1.24
  10  -4  13  287.96   10.99
  10   4  13  300.04   10.75
  10   4  13  306.88   10.49
  10   4  14  254.75    9.77
  10  -4  14  271.79   10.47
  10   4  14  269.02   10.51
  10  -6 -15  380.21   12.54
  10  -6 -14   42.35    3.71
 -10   6  14   43.39    3.65
 -10   6  14   50.76    4.00
 -10   6  13  230.27    8.61
 -10   6  13  218.24    8.47
  10  -6 -13  219.70    8.51
  10  -6 -13  216.42    7.04
 -10  -6  12   98.77    3.95
 -10   6  12  107.27    5.37
 -10   6  12  102.23    5.33
  10  -6 -12  102.51    5.31
  10  -6 -12   95.99    4.34
 -10  -6  11  732.67   18.32
 -10  -6  11  754.02   17.17
 -10   6  11  802.47   19.27
  10  -6 -11  777.44   19.27
 -10   6  11  792.16   19.21
  10  -6 -11  793.68   18.11
  10  -6 -10  186.17    6.45
 -10  -6  10  184.50    6.49
 -10   6  10  199.23    7.17
 -10   6  10  198.72    7.16
  10  -6 -10  178.93    7.00
 -10  -6  10  184.32    6.00
 -10  -6   9  333.40    9.12
 -10  -6   9  316.64    9.46
 -10   6   9  330.27    9.77
  10  -6  -9  331.64   10.02
 -10   6   9  323.68    9.76
  10  -6  -9  340.09    9.51
 -10  -6   8  119.77    4.67
 -10  -6   8  126.61    4.55
 -10  -6   8  124.74    4.93
 -10   6   8  137.26    5.26
 -10   6   8  128.19    5.24
  10  -6  -8  124.83    5.06
 -10  -6   7   22.98    1.68
 -10  -6   7   22.69    1.87
 -10   6   7   20.24    1.96
  10   6  -7   23.64    1.03
 -10   6   7   22.67    2.06
  10  -6  -7   20.97    2.03
 -10  -6   6   46.54    2.20
 -10   6   6   47.20    2.80
 -10   6   6   46.59    2.80
  10  -6  -6   43.85    3.42
 -10  -6   6   43.63    2.44
  10   6  -6   46.35    1.37
  10  -6  -6   47.60    2.98
  10  -6  -6   45.97    3.52
  10  -6  -5 1657.10   36.60
 -10  -6   5 1674.18   33.05
 -10  -6   5 1670.92   33.88
  10  -6  -5 1729.37   36.74
 -10   6   5 1678.33   36.30
 -10   6   5 1700.80   34.75
  10  -6  -5 1747.33   35.42
 -10   6   5 1683.38   34.51
 -10   6   4    3.04    0.93
  10  -6  -4    6.38    1.38
 -10  -6   4    5.26    0.91
 -10   6   4    4.47    1.05
  10  -6  -4    7.55    1.52
 -10   6   4    4.52    1.12
  10  -6  -4    5.96    1.30
 -10  -6   4    4.75    0.68
  10  -6  -3   88.05    4.36
 -10  -6   3   92.94    3.35
 -10   6   3   95.29    3.93
 -10   6   3   97.22    4.49
  10  -6  -3   87.16    4.34
 -10  -6   3   90.27    2.76
 -10   6   3   89.86    3.87
  10  -6  -3   96.64    4.39
 -10  -6   2   55.64    2.48
  10  -6  -2   61.13    3.39
 -10   6   2   56.77    3.00
  10  -6  -2   62.53    3.42
 -10  -6   2   58.09    2.02
 -10   6   2   58.52    3.32
 -10   6   2   59.04    3.09
  10  -6  -2   65.57    3.58
 -10   6   1 2313.88   46.47
 -10  -6   1 2334.85   45.37
  10   6  -1 2316.43   44.43
 -10  -6   1 2341.78   44.40
  10  -6  -1 2367.31   46.73
 -10   6   1 2320.20   46.65
  10  -6  -1 2338.33   46.75
 -10   6   1 2295.12   47.01
  10  -6  -1 2264.79   47.35
 -10   6   0  613.28   15.11
  10   6   0  624.39   12.85
  10  -6   0  615.69   14.68
  10   6   0  614.10   14.04
 -10  -6   0  634.84   13.08
 -10  -6   0  625.67   13.94
  10  -6   0  626.29   14.75
 -10   6   0  642.87   15.00
  10  -6   0  612.47   15.62
  10  -6   1   25.92    2.41
  10   6   1   28.39    1.36
 -10   6  -1   26.78    2.24
 -10  -6  -1   23.52    1.76
  10   6   1   26.02    1.74
  10  -6   1   26.83    2.04
 -10  -6  -1   27.53    1.60
 -10   6  -1   27.66    2.39
  10  -6   1   27.67    2.05
  10  -6   2   -0.18    0.89
 -10   6  -2    3.51    1.29
 -10  -6  -2    0.57    0.61
  10  -6   2    0.77    0.83
 -10  -6  -2    0.68    0.64
  10   6   2    2.12    0.81
  10  -6   2   -0.23    0.70
  10   6   2    1.93    0.50
 -10   6  -2    1.05    0.98
  10  -6   3  236.21    8.15
 -10   6  -3  228.30    8.04
 -10  -6  -3  244.35    6.73
  10  -6   3  219.51    6.83
  10   6   3  233.30    6.31
  10   6   3  235.99    5.68
 -10   6  -3  240.58    7.88
  10  -6   3  233.29    7.01
 -10  -6  -3  225.36    7.08
  10   6   4  104.32    3.67
  10  -6   4  106.80    5.22
 -10   6  -4   94.74    4.96
 -10   6  -4  105.18    4.88
 -10  -6  -4  105.96    5.80
  10  -6   4  107.33    4.22
  10   6   4  101.87    3.26
 -10  -6  -4  105.61    4.15
 -10  -6  -4   99.07    4.43
  10  -6   4  105.40    4.28
  10  -6   5  550.75   14.95
 -10   6  -5  535.04   14.98
 -10   6  -5  533.52   14.13
 -10  -6  -5  551.58   16.07
  10  -6   5  496.67   12.98
  10   6   5  537.10   12.01
 -10  -6  -5  541.18   14.05
 -10  -6  -5  545.25   13.38
  10   6   5  568.83   12.49
  10  -6   6  217.09    8.28
 -10   6  -6  211.97    8.48
 -10  -6  -6  220.27    7.76
  10   6   6  228.03    6.38
  10   6   6  228.16    6.45
 -10   6  -6  213.51    7.64
  10  -6   7  172.52    7.39
 -10  -6  -7  161.61    6.78
  10   6   7  170.92    5.62
  10   6   7  170.49    5.51
  10  -6   8   54.85    4.14
 -10  -6  -8   51.24    3.84
  10   6   8   64.34    3.22
  10   6   8   60.07    3.24
  10   6   9  370.69   10.16
  10   6   9  385.00   10.54
  10  -6   9  364.82   12.46
  10  -6  10   11.78    2.30
  10   6  10   12.98    1.80
  10   6  10   12.71    1.80
  10  -6  11  223.36    9.61
  10   6  11  221.26    7.71
  10   6  11  225.52    8.12
  10  -6  12    1.50    1.40
  10   6  12    0.94    1.23
  10   6  12    2.92    1.45
  10   6  13  300.10   10.09
  10   6  13  318.15   10.80
  10  -6  13  292.30   11.77
  10  -8 -12   11.48    2.08
 -10   8  12   13.43    2.20
 -10   8  12   11.60    2.05
  10  -8 -11    7.86    1.70
 -10  -8  11    7.66    1.46
 -10   8  11    7.30    1.74
 -10   8  11    7.06    1.81
 -10   8  10    5.31    1.50
  10  -8 -10    5.87    1.60
 -10  -8  10    5.93    1.40
 -10   8  10    6.92    1.72
 -10   8   9  296.71    9.35
 -10   8   9  290.83    9.30
  10  -8  -9  276.25    9.34
 -10  -8   9  271.16    8.77
 -10   8   8  159.18    6.30
 -10  -8   8  157.08    6.15
  10  -8  -8  156.22    6.51
 -10   8   8  161.93    6.30
 -10  -8   8  152.75    5.24
 -10   8   7  269.19    8.37
  10   8  -7  247.07    5.81
 -10   8   7  249.50    8.22
 -10  -8   7  255.68    8.39
 -10  -8   7  234.77    6.78
  10  -8  -7  247.83    8.64
 -10   8   6   29.24    2.52
 -10   8   6   24.14    2.40
 -10  -8   6   27.60    1.81
  10  -8  -6   27.85    2.82
 -10   8   5  369.88   10.24
 -10  -8   5  345.98    8.49
 -10   8   5  360.58   10.14
 -10  -8   5  335.82    9.33
  10  -8  -5  354.07   10.89
 -10  -8   4  112.78    4.43
  10  -8  -4  127.08    5.76
 -10   8   4  116.05    5.01
 -10   8   4  123.03    5.15
 -10   8   3  153.12    5.87
 -10  -8   3  148.10    4.45
 -10   8   3  141.37    5.70
 -10  -8   3  139.88    4.99
  10  -8  -3  153.29    6.46
 -10   8   2   34.32    2.76
 -10   8   2   35.95    2.79
 -10  -8   2   38.82    2.02
 -10  -8   2   35.78    2.33
  10  -8  -2   36.23    3.07
  10   8  -1  359.52    9.15
 -10   8   1  372.44   10.82
 -10   8   1  392.04   10.97
 -10  -8   1  384.70    9.16
 -10  -8   1  359.03    9.85
  10  -8  -1  386.62   11.56
 -10   8   0   69.59    4.01
  10   8   0   69.66    3.54
 -10  -8   0   61.44    3.34
 -10  -8   0   63.24    2.86
  10  -8   0   66.20    4.27
 -10   8   0   61.93    3.80
  10   8   0   62.05    2.73
  10  -8   1    6.32    1.71
  10   8   1    4.76    1.10
  10   8   1    5.13    0.85
 -10   8  -1    0.42    1.37
 -10  -8  -1    2.29    0.75
 -10  -8  -1    3.76    1.07
 -10   8  -1    0.05    1.40
 -10  -8  -2   31.81    2.55
 -10   8  -2   38.36    3.29
  10   8   2   34.67    2.42
  10   8   2   35.90    1.95
  10  -8   2   33.95    3.11
  10  -8   3  429.04   13.20
 -10   8  -3  433.32   13.22
 -10  -8  -3  446.33   11.06
  10   8   3  463.50   10.37
  10   8   3  443.25   11.34
  10  -8   4  130.41    6.43
 -10   8  -4  137.63    6.60
  10   8   4  128.32    4.87
 -10  -8  -4  126.00    4.83
  10   8   4  126.60    4.11
 -10  -8  -4  116.61    5.59
  10  -8   5   76.58    4.89
 -10  -8  -5   78.06    3.83
 -10   8  -5   73.68    5.02
  10   8   5   74.12    3.50
 -10  -8  -5   62.16    4.25
  10   8   5   73.71    3.02
  10  -8   6   16.66    2.61
  10   8   6   13.87    1.60
 -10   8  -6   15.13    2.44
  10   8   6   14.78    1.45
 -10  -8  -6   14.79    1.85
 -10  -8  -6   11.64    2.06
  10  -8   7  374.05   12.84
  10   8   7  376.71   10.16
 -10  -8  -7  379.83   11.10
  10   8   7  371.95    9.59
  10  -8   8  149.75    7.61
  10   8   8  147.82    5.27
 -10  -8  -8  157.18    6.49
  10   8   8  145.56    5.50
  10  -8   9  291.06   11.70
  10   8   9  318.73    9.01
 -10  -8  -9  306.59   10.31
  10   8   9  314.68    9.25
 -10  -8 -10   -1.20    1.36
  10  -8  10   -0.93    1.64
  10   8  10    0.44    1.05
  10   8  10    2.73    1.31
 -10  10   8  183.75    7.43
 -10  10   8  172.90    7.16
 -10 -10   8  165.97    7.19
  10 -10  -8  170.83    7.89
 -10  10   7  141.71    6.24
 -10 -10   7  132.26    6.21
  10 -10  -7  129.05    6.60
  10 -10  -6   16.69    2.56
 -10  10   6   18.10    2.45
 -10  10   6   18.07    2.48
 -10 -10   6   13.89    2.36
 -10  10   5  178.57    7.32
 -10 -10   5  183.04    7.68
 -10  10   5  198.26    7.57
  10 -10  -5  188.85    8.05
  10 -10  -4  397.03   12.89
 -10  10   4  389.75   11.78
 -10  10   4  378.65   11.74
 -10  10   3    3.69    1.49
  10 -10  -3    0.80    1.61
 -10  10   3    4.20    1.55
 -10  10   2  259.76    9.18
 -10  10   2  247.45    9.18
  10 -10  -2  262.91    9.86
 -10  10   1  107.61    5.51
 -10  10   1  100.44    5.54
  10  10  -1   93.09    4.17
  10 -10  -1  101.90    5.80
 -10  10   0  206.81    8.10
  10  10   0  185.38    6.23
 -10  10   0  201.28    8.08
  10 -10   0  191.57    8.45
  10 -10   1   20.61    3.03
  10  10   1   23.83    1.94
 -10  10  -1   28.63    3.19
  10  10   1   22.00    2.35
 -10  10  -2  151.84    7.23
  10  10   2  131.36    4.94
  10  10   2  144.20    6.08
  10 -10   2  131.57    6.95
  10  10   3  308.26    8.70
 -10  10  -3  336.50   11.89
  10 -10   3  319.16   11.83
  10  10   3  338.92   10.17
 -10  10  -4  125.36    6.99
  10  10   4  115.84    5.32
  10 -10   4  113.04    6.56
  10  10   4  112.83    4.39
  10 -10   5    8.54    2.40
  10  10   5    5.25    1.55
 -10  10  -5    4.02    1.86
 -10  10  -6  258.23   11.46
  10 -10   6  264.42   10.98
  10  10   6  277.82    8.90
 -10 -10  -6  276.94    9.00
  10  10   7   21.55    2.35
  10 -10   7   27.80    3.56
 -10 -10  -7   20.57    2.49
 -11  -1  17  181.07    9.06
 -11   1  17  176.36    8.78
 -11   1  17  183.60    9.09
 -11  -1  17  184.38    9.49
  11   1 -17  170.63    7.32
  11  -1 -17  173.22    7.69
  11   1 -16   93.82    5.12
 -11  -1  16  107.66    6.57
 -11   1  16  111.79    6.55
 -11  -1  16  106.52    6.87
  11  -1 -16  108.39    5.56
 -11   1  16  100.35    6.39
  11   1 -15  387.61   11.67
  11  -1 -15  416.32   12.35
 -11  -1  15  406.13   13.71
 -11   1  15  401.84   13.42
 -11  -1  15  403.93   14.16
 -11   1  15  406.13   13.72
 -11   1  14    5.83    1.93
  11   1 -14   -0.97    1.20
 -11  -1  14    0.41    1.33
 -11  -1  14   -0.35    1.61
 -11   1  14    1.45    1.43
  11  -1 -14    4.78    1.40
 -11   1  13    0.37    1.37
  11  -1 -13   -0.33    1.27
 -11  -1  13    0.27    1.25
 -11   1  13   -0.17    1.02
  11   1 -13   -0.88    1.09
 -11  -1  13    0.02    1.31
 -11   1  12    8.73    1.82
 -11  -1  12    9.88    1.79
 -11   1  12   10.45    1.90
 -11  -1  12    8.42    1.90
  11   1 -12    9.07    1.34
  11  -1 -12   10.21    1.62
 -11  -1  11  404.57   11.93
 -11   1  11  386.44   11.66
 -11  -1  11  420.05   12.50
  11   1 -11  406.92   10.58
  11  -1 -11  419.55   11.04
 -11   1  11  397.13   12.04
 -11  -1  10  269.69    8.68
 -11   1  10  265.97    8.60
 -11  -1  10  268.16    9.05
  11   1 -10  273.10    7.53
  11  -1 -10  270.32    7.88
 -11   1  10  268.39    8.88
 -11  -1   9  100.87    4.54
 -11   1   9  103.21    4.64
 -11  -1   9  116.00    5.11
 -11   1   9  109.65    4.86
  11   1  -9  100.83    3.75
  11  -1  -9  107.11    4.15
  11   1  -8    3.61    0.71
  11  -1  -8    4.56    0.93
  11  -1  -8    4.14    0.50
 -11   1   8    5.82    1.28
 -11  -1   8    3.25    0.88
  11  -1  -8    2.87    0.94
 -11   1   8    2.68    0.81
 -11  -1   8    2.19    1.05
  11  -1  -7 2193.82   42.65
 -11  -1   7 2288.35   42.07
  11  -1  -7 2197.63   45.25
 -11  -1   7 2138.88   44.14
 -11  -1   7 2217.64   44.70
 -11   1   7 2220.40   44.36
  11  -1  -7 2305.34   43.69
  11   1  -7 2195.09   42.94
 -11   1   7 2223.67   44.64
 -11  -1   6  449.25    9.47
 -11   1   6  443.01    9.37
  11  -1  -6  444.34   10.12
 -11  -1   6  421.68   10.40
  11  -1  -6  438.28   11.19
 -11  -1   6  425.40   10.83
 -11   1   6  430.17   10.53
  11   1  -6  435.33    9.48
  11  -1  -6  440.19    9.77
 -11   1   6  443.08   10.75
 -11   1   5  315.25    8.09
 -11   1   5  335.94    8.06
  11  -1  -5  324.43    7.79
 -11  -1   5  336.15    7.73
 -11   1   5  324.92    7.37
  11  -1  -5  315.00    8.54
 -11  -1   5  321.09    7.86
 -11  -1   5  322.63    8.21
  11  -1  -5  333.85    8.65
 -11   1   5  321.68    8.07
 -11   1   4  249.48    6.05
  11  -1  -4  234.39    6.36
 -11   1   4  243.26    6.23
 -11   1   4  243.38    6.16
 -11  -1   4  244.72    6.37
  11   1  -4  247.64    6.47
  11  -1  -4  240.43    6.63
 -11  -1   4  253.30    6.02
 -11  -1   4  252.44    6.30
  11  -1  -4  255.10    6.72
 -11   1   4  235.49    6.17
  11  -1  -3 3067.36   59.16
 -11  -1   3 3057.11   59.12
  11   1  -3 2962.88   59.12
 -11   1   3 2951.47   58.07
  11  -1  -3 3090.14   58.86
 -11  -1   3 3177.83   58.22
 -11   1   3 2951.12   58.34
  11  -1  -3 3052.47   58.73
 -11   1   3 2979.40   58.51
 -11  -1   2  471.48    9.48
  11  -1  -2  466.05   11.09
 -11   1   2  478.62   10.73
 -11  -1   2  482.20   11.18
 -11   1   2  448.35   10.12
  11   1  -2  474.76   11.27
  11   1  -2  479.80    9.82
  11  -1  -2  480.34   10.47
 -11   1   2  474.72    9.77
 -11  -1   2  471.70    9.50
  11  -1  -2  465.72   10.18
 -11   1   1  101.06    3.55
  11  -1  -1   93.43    3.71
 -11  -1   1  104.72    3.88
  11  -1  -1   98.65    2.78
  11   1  -1  103.56    3.94
  11   1  -1  103.98    2.54
  11  -1  -1   96.28    3.06
 -11   1   1   95.96    3.02
 -11  -1   1  100.97    2.46
 -11   1   0 2381.73   45.38
  11  -1   0 2238.53   45.73
 -11  -1   0 2316.27   45.82
  11   1   0 2242.84   45.86
 -11   1   0 2322.39   44.43
  11  -1   0 2439.18   44.38
 -11   1   0 2220.45   43.73
 -11   1  -1 1919.36   37.64
 -11  -1  -1 1997.45   39.18
  11   1   1 1941.41   39.30
  11  -1   1 1964.45   36.84
  11  -1   1 1905.28   39.10
 -11   1  -1 1892.63   38.60
  11  -1   1 1977.84   37.45
  11   1   1 1869.48   36.67
  11  -1   2    2.52    0.58
 -11   1  -2    1.07    0.66
  11   1   2    2.60    0.49
  11  -1   2    1.93    0.75
 -11  -1  -2    2.25    0.95
 -11   1  -2    3.83    0.71
  11   1   2    2.08    1.01
  11  -1   2    1.76    0.39
  11   1   2    1.63    0.34
  11  -1   3 1544.14   31.44
 -11   1  -3 1573.57   32.68
  11   1   3 1599.24   31.12
  11  -1   3 1566.68   33.28
  11  -1   3 1521.53   30.85
  11   1   3 1590.07   33.42
 -11   1  -3 1547.39   31.90
  11   1   3 1568.53   31.01
  11  -1   4  301.21    7.42
 -11   1  -4  284.74    8.15
 -11  -1  -4  280.67    8.54
  11  -1   4  288.87    8.66
  11   1   4  288.86    7.14
  11   1   4  274.17    8.63
  11   1   4  271.98    7.08
 -11   1  -5  293.56    8.52
 -11  -1  -5  286.61    8.88
  11  -1   5  284.22    8.91
  11   1   5  296.93    7.58
  11   1   5  296.12    9.12
  11  -1   5  290.77    7.70
  11   1   5  290.05    7.67
 -11   1  -6    6.22    1.16
 -11  -1  -6    8.00    1.43
  11  -1   6    8.75    1.51
  11  -1   6    8.12    1.13
  11   1   6    7.91    1.07
  11   1   6    7.68    1.47
  11   1   6    7.45    1.17
 -11   1  -7 1042.41   23.39
 -11  -1  -7 1081.50   24.22
  11  -1   7 1042.81   22.78
  11  -1   7 1010.63   24.07
  11   1   7 1069.41   24.29
  11   1   7 1043.30   23.03
 -11   1  -8  299.47    9.01
 -11  -1  -8  283.18    9.30
  11  -1   8  302.48    8.72
  11   1   8  300.29    9.69
  11   1   8  287.07    8.85
  11  -1   8  290.31    9.60
 -11  -1  -9   45.15    3.38
  11  -1   9   49.65    3.18
  11  -1   9   49.85    3.64
  11   1   9   48.21    3.60
  11   1   9   50.02    3.29
 -11   1  -9   49.23    3.27
 -11   1 -10   42.82    3.01
 -11  -1 -10   46.14    3.44
  11  -1  10   44.58    3.47
  11  -1  10   39.83    3.39
  11   1  10   44.03    3.33
 -11  -1 -11   37.30    3.21
  11  -1  11   37.35    3.40
  11  -1  11   40.28    3.59
 -11   1 -11   43.72    3.09
  11   1  11   44.97    3.50
 -11   1 -12   64.85    3.93
 -11  -1 -12   62.18    4.16
  11  -1  12   77.03    4.94
  11  -1  12   71.99    5.03
  11   1  12   70.84    4.73
  11  -1  13    1.67    1.52
  11  -1  13    1.60    1.67
  11   1  13   -0.82    1.55
  11  -1  14  170.75    7.77
  11  -1  14  176.55    8.70
  11   1  14  165.74    8.16
  11  -1  15  346.05   13.39
  11   1  15  334.69   12.68
 -11   3  16   47.60    4.28
  11  -3 -16   56.15    4.20
 -11  -3  16   54.49    5.21
 -11   3  16   56.42    4.61
 -11   3  15   95.51    5.81
  11  -3 -15  102.12    5.40
 -11  -3  15   94.51    6.47
 -11   3  15   94.81    5.69
 -11   3  14    3.38    1.37
 -11   3  14    5.78    1.75
 -11  -3  14    6.00    2.12
  11  -3 -14    5.32    1.50
 -11   3  13   57.06    4.11
  11  -3 -13   65.27    3.99
 -11  -3  13   57.64    4.66
 -11   3  13   59.07    4.11
  11  -3 -12  116.64    3.51
  11  -3 -12  118.69    3.72
 -11  -3  12  123.35    6.54
 -11   3  12  127.62    5.91
 -11   3  12  118.35    5.72
  11  -3 -12  126.17    5.51
  11  -3 -11 1667.56   32.84
 -11   3  11 1627.54   36.01
 -11  -3  11 1651.04   37.44
 -11   3  11 1710.78   36.12
  11  -3 -11 1712.83   35.42
 -11  -3  10   13.05    0.65
  11  -3 -10   13.62    1.21
 -11   3  10   12.30    1.70
 -11  -3  10   11.09    1.98
  11  -3 -10   12.90    2.13
 -11   3  10   13.64    1.86
 -11  -3  10   13.22    0.74
  11  -3 -10   17.94    1.88
  11  -3  -9  172.87    5.01
 -11  -3   9  172.86    4.66
 -11   3   9  165.91    6.20
  11  -3  -9  172.07    7.09
 -11   3   9  170.23    6.28
  11  -3  -9  183.31    6.11
 -11  -3   9  173.20    4.24
  11  -3  -8  427.64   10.09
 -11   3   8  410.69   11.18
 -11  -3   8  436.57    9.98
  11  -3  -8  438.68   12.39
 -11   3   8  440.21   11.38
  11   3  -8  429.32    9.46
  11  -3  -8  432.95   10.97
  11  -3  -7  170.00    5.14
 -11   3   7  173.69    5.73
 -11  -3   7  176.77    5.27
  11  -3  -7  167.01    6.42
 -11   3   7  170.67    5.76
  11  -3  -7  174.52    6.59
  11   3  -7  177.73    4.24
  11  -3  -7  173.55    5.62
  11  -3  -6   41.69    2.17
 -11   3   6   39.01    2.27
 -11  -3   6   37.02    2.16
  11  -3  -6   38.78    2.67
 -11   3   6   40.48    2.39
  11  -3  -6   38.51    2.71
 -11   3   6   34.95    2.37
  11   3  -6   39.38    1.18
  11  -3  -5  691.89   15.18
 -11  -3   5  705.73   15.51
 -11   3   5  675.73   15.04
  11  -3  -5  702.42   16.24
  11  -3  -5  682.15   16.12
 -11   3   5  668.21   15.14
 -11   3   5  699.73   15.77
 -11   3   5  675.37   15.04
  11  -3  -4  507.80   12.61
  11  -3  -4  519.89   12.27
 -11   3   4  532.22   12.46
 -11   3   4  518.71   11.98
 -11  -3   4  536.95   12.66
  11  -3  -4  578.81   13.06
 -11   3   4  500.29   11.70
 -11   3   4  550.90   12.20
  11  -3  -3 1262.18   26.67
 -11  -3   3 1314.15   24.73
 -11  -3   3 1298.00   27.26
 -11  -3   3 1327.72   24.90
  11  -3  -3 1296.98   26.94
 -11  -3   3 1286.72   25.19
  11  -3  -3 1282.05   26.77
 -11   3   3 1303.70   26.24
 -11   3   3 1295.42   26.71
 -11   3   3 1299.85   25.94
 -11   3   3 1316.51   26.48
  11  -3  -2   73.36    3.30
 -11   3   2   74.39    2.77
 -11  -3   2   80.74    2.23
  11  -3  -2   78.13    3.11
 -11  -3   2   77.86    3.58
  11  -3  -2   77.68    3.21
 -11   3   2   77.11    2.99
 -11   3   2   79.90    3.16
  11  -3  -1 2898.85   56.49
  11  -3  -1 3057.16   55.83
 -11  -3   1 2826.28   56.93
 -11   3   1 2992.97   56.02
 -11   3   1 2889.09   55.19
  11  -3  -1 2977.57   55.45
 -11   3   1 2931.31   55.65
 -11   3   0 5513.16  109.27
  11  -3   0 5899.08  109.22
  11  -3   0 5865.15  110.27
 -11  -3   0 5887.17  110.91
 -11   3   0 5723.46  109.55
  11  -3   1 1700.20   35.92
 -11   3  -1 1635.59   34.98
  11  -3   1 1737.33   34.21
 -11  -3  -1 1768.01   36.58
 -11   3  -1 1600.56   34.41
  11   3   1 1768.06   33.16
 -11  -3  -1 1725.84   33.47
  11  -3   1 1778.91   34.68
 -11   3  -1 1862.53   35.42
  11  -3   2    3.06    0.76
 -11   3  -2    0.74    0.68
  11  -3   2    0.34    0.70
 -11   3  -2    1.02    0.76
  11   3   2    0.65    0.33
 -11  -3  -2    1.57    0.91
  11  -3   2    1.35    0.55
  11   3   2    2.66    0.44
 -11  -3  -2    2.22    0.45
  11  -3   3  152.64    5.83
  11  -3   3  163.10    4.66
 -11   3  -3  152.22    5.37
 -11  -3  -3  168.31    6.30
  11   3   3  158.75    4.30
 -11  -3  -3  152.43    4.53
  11   3   3  157.03    4.01
 -11   3  -3  162.65    5.40
  11  -3   3  159.93    4.92
  11  -3   4  913.49   19.33
  11  -3   4  909.97   20.84
  11   3   4  886.06   18.18
 -11  -3  -4  869.46   21.14
 -11   3  -4  872.93   20.09
 -11  -3  -4  906.57   19.03
  11  -3   4  898.56   18.85
 -11   3  -4  910.50   19.88
 -11   3  -5    3.53    0.93
  11  -3   5    6.80    1.14
  11  -3   5    3.49    1.17
  11  -3   5    4.39    0.79
 -11  -3  -5    5.68    1.37
  11   3   5    3.34    0.69
 -11   3  -6  107.42    4.42
  11   3   6  108.20    3.92
 -11  -3  -6  110.22    5.33
  11  -3   6   99.28    4.12
  11  -3   6   97.44    4.93
  11  -3   6  104.40    3.93
 -11   3  -7  128.94    5.08
  11  -3   7  129.10    4.98
  11  -3   7  117.41    5.63
 -11  -3  -7  126.43    6.01
  11   3   7  128.58    4.71
 -11   3  -8  926.19   21.14
  11  -3   8  895.20   21.13
  11  -3   8  940.84   22.73
 -11  -3  -8  953.88   23.07
  11   3   8  965.12   21.05
 -11   3  -9   -0.59    0.99
  11   3   9    1.55    1.12
  11  -3   9    0.71    1.17
 -11  -3  -9    0.55    1.02
 -11  -3 -10  732.54   19.58
  11  -3  10  730.45   19.49
  11   3  10  752.31   18.21
 -11   3 -10  736.37   17.77
  11  -3  11  416.88   13.18
  11   3  11  441.40   12.40
  11   3  12  138.24    6.45
  11  -3  12  144.73    7.06
  11   3  13    0.90    1.51
  11  -3  13    1.51    1.40
  11  -3  14   28.23    3.21
  11   3  14   28.22    3.38
  11  -3  14   31.59    3.92
  11   3  14   31.48    3.35
 -11   5  15   93.72    5.44
 -11  -5  15   83.25    6.53
 -11   5  15   89.61    5.53
  11  -5 -15   84.87    5.16
 -11   5  14  150.20    7.11
 -11  -5  14  158.13    8.70
  11  -5 -14  181.53    7.50
 -11   5  14  177.96    7.73
 -11   5  13   55.37    3.87
 -11   5  13   53.28    3.86
  11  -5 -13   50.21    3.73
  11  -5 -13   44.28    2.55
 -11  -5  12  311.05    7.45
 -11   5  12  322.11   10.30
  11  -5 -12  326.22   10.17
  11  -5 -12  313.25    8.50
 -11  -5  11   31.88    2.70
 -11   5  11   39.16    3.13
  11  -5 -11   42.59    3.22
 -11   5  11   27.68    2.72
  11  -5 -11   34.26    2.31
 -11  -5  11   37.05    1.98
 -11  -5  10  140.72    5.41
 -11   5  10  127.80    5.54
  11  -5 -10  140.84    5.73
 -11  -5  10  134.35    4.34
  11  -5 -10  134.58    4.90
  11  -5  -9   53.43    2.88
  11  -5  -9   51.32    3.22
 -11   5   9   52.10    3.26
 -11  -5   9   49.11    2.88
 -11   5   9   52.64    3.26
 -11  -5   9   45.83    2.45
 -11  -5   8  648.32   14.57
  11  -5  -8  616.34   17.12
 -11   5   8  629.68   15.24
 -11   5   8  617.66   15.25
  11  -5  -8  613.26   17.16
  11  -5  -8  639.74   14.91
 -11  -5   7  147.12    4.70
  11  -5  -7  137.57    6.35
  11  -5  -7  142.82    6.40
 -11   5   7  152.19    5.37
 -11   5   7  137.20    5.26
  11  -5  -7  151.00    5.29
 -11  -5   6  764.11   15.93
  11  -5  -6  752.42   18.74
 -11   5   6  761.80   16.96
 -11   5   6  737.01   17.01
 -11   5   6  753.21   18.29
  11  -5  -6  780.98   17.35
 -11  -5   6  727.59   16.36
  11  -5  -6  722.04   18.59
  11  -5  -5  370.73   10.71
 -11   5   5  363.46    9.31
  11  -5  -5  367.07   10.76
 -11   5   5  363.54   10.37
 -11   5   5  340.69    9.32
 -11  -5   5  364.65    8.13
 -11  -5   5  354.37    8.73
  11  -5  -5  359.82    9.74
 -11  -5   4 2301.24   45.18
  11  -5  -4 2385.84   47.65
 -11   5   4 2306.16   47.30
  11  -5  -4 2363.68   47.69
  11  -5  -4 2358.39   46.95
 -11   5   4 2344.04   46.26
 -11   5   4 2277.69   45.90
 -11  -5   4 2282.63   44.32
 -11   5   3  210.99    6.07
  11  -5  -3  209.90    6.79
 -11  -5   3  206.31    5.40
 -11  -5   3  204.78    4.59
 -11   5   3  206.45    6.80
 -11   5   3  209.62    6.29
  11  -5  -3  208.58    6.71
  11  -5  -2  404.30   10.84
 -11  -5   2  420.24    9.15
  11  -5  -2  426.82   10.71
 -11   5   2  461.09   10.30
 -11  -5   2  412.38    8.14
 -11   5   2  318.20   10.05
 -11   5   2  406.57   10.76
 -11   5   2  426.94   10.36
  11  -5  -1  109.84    4.65
 -11  -5   1  111.80    3.40
 -11  -5   1  103.19    2.51
 -11   5   1  117.50    4.22
  11  -5  -1  115.12    4.35
 -11   5   1  109.15    4.51
 -11   5   1  117.28    4.43
  11  -5   0  790.42   18.35
 -11   5   0  756.65   17.67
  11   5   0  794.90   14.90
 -11  -5   0  767.49   16.23
 -11   5   0  757.06   17.84
 -11   5   0  774.37   17.40
  11   5   0  776.15   16.31
  11  -5   0  783.67   17.39
 -11  -5   0  780.41   15.73
  11  -5   0  787.54   17.27
  11  -5   1  193.75    6.03
  11  -5   1  182.08    6.82
 -11   5  -1  215.31    6.88
 -11  -5  -1  219.18    5.50
  11   5   1  203.57    5.45
 -11  -5  -1  204.32    5.65
  11  -5   1  214.64    6.36
 -11   5  -1  204.98    6.50
  11   5   1  210.65    4.53
 -11   5  -1  201.63    6.71
  11  -5   2   27.50    2.46
 -11   5  -2   25.41    2.26
  11  -5   2   21.88    1.71
 -11  -5  -2   24.41    1.57
 -11  -5  -2   24.21    2.50
  11   5   2   25.05    1.49
  11   5   2   24.89    1.06
  11  -5   2   23.66    1.87
 -11  -5  -2   23.06    1.70
  11  -5   3  107.52    5.05
  11   5   3  106.65    3.40
 -11   5  -3  105.77    4.86
 -11  -5  -3  119.56    5.74
  11  -5   3  103.32    3.96
  11   5   3  105.43    2.98
 -11  -5  -3  105.53    4.04
  11  -5   3  111.89    4.26
 -11   5  -3  110.83    4.61
  11  -5   4 2392.74   49.67
  11  -5   4 2411.63   47.49
 -11   5  -4 2248.57   49.25
 -11  -5  -4 2323.05   50.55
  11   5   4 2483.49   46.28
 -11  -5  -4 2418.42   47.93
  11   5   4 2481.52   46.54
 -11   5  -4 2535.30   48.80
  11  -5   4 2405.05   47.89
 -11   5  -5  170.03    6.19
  11  -5   5  170.12    6.93
  11  -5   5  163.23    5.54
 -11   5  -5  176.55    6.95
 -11  -5  -5  180.31    7.57
 -11  -5  -5  169.68    6.03
  11   5   5  176.05    5.06
  11   5   5  171.17    5.00
  11  -5   5  171.90    5.84
  11  -5   6    3.77    1.29
  11  -5   6    8.65    1.27
  11  -5   6    6.61    1.22
  11   5   6    7.83    1.11
 -11   5  -6    6.31    1.59
 -11  -5  -6    4.45    1.62
  11   5   6    4.68    0.93
 -11  -5  -6    3.39    1.17
 -11   5  -6    6.27    1.35
  11  -5   7   56.80    3.99
 -11  -5  -7   54.15    4.25
  11   5   7   55.22    2.80
 -11  -5  -7   55.78    3.58
  11   5   7   57.55    2.99
  11  -5   7   51.89    3.04
 -11   5  -7   56.86    3.42
  11   5   8  213.37    6.62
 -11  -5  -8  205.06    7.74
  11   5   8  211.10    6.95
  11  -5   8  204.15    8.40
 -11   5  -8  209.20    7.35
  11  -5   9   99.02    5.78
  11   5   9  104.92    4.47
  11   5   9  103.20    4.71
  11  -5  10   59.53    4.58
  11   5  10   58.48    3.44
  11   5  10   62.55    3.82
  11  -5  11  308.27   11.40
  11   5  11  308.61    9.56
  11   5  11  303.61   10.04
  11   5  12  242.55    8.45
  11  -5  12  235.24    9.98
  11   5  12  236.64    8.87
  11   5  13  107.07    5.52
  11  -5  13  106.76    6.55
  11   5  13  109.71    5.97
  11  -7 -13   10.39    1.70
  11  -7 -13   14.16    2.35
 -11   7  13   16.40    2.52
 -11   7  13    8.43    1.96
  11  -7 -12   18.68    2.08
 -11   7  12   17.27    2.27
 -11   7  12   22.38    2.63
 -11  -7  11  142.48    5.30
 -11   7  11  137.94    6.14
 -11   7  11  141.97    6.15
  11  -7 -11  132.67    5.71
 -11  -7  10   77.17    3.72
 -11   7  10   71.88    4.18
 -11   7  10   68.89    4.21
 -11  -7  10   74.38    3.68
  11  -7 -10   72.69    3.99
  11  -7  -9    1.37    1.10
 -11  -7   9    0.23    0.87
 -11   7   9    2.27    1.26
  11   7  -9    1.45    0.43
 -11   7   9    1.19    1.15
 -11  -7   9    2.34    1.02
 -11  -7   8  749.22   17.10
 -11   7   8  832.02   18.77
  11   7  -8  773.27   15.06
 -11  -7   8  784.53   18.28
  11  -7  -8  801.78   18.95
  11  -7  -7    4.47    1.30
 -11  -7   7    3.01    0.83
 -11   7   7    3.06    1.30
 -11  -7   7    3.66    1.10
 -11   7   7    5.86    1.52
 -11   7   6  185.61    6.48
 -11   7   6  195.50    6.69
 -11  -7   6  195.39    5.39
 -11  -7   6  184.92    6.01
  11  -7  -6  202.13    7.17
 -11   7   5  247.22    7.53
 -11  -7   5  237.99    6.88
 -11   7   5  245.46    7.70
  11  -7  -5  244.21    8.17
 -11  -7   5  232.75    6.02
 -11   7   4 1083.58   23.39
 -11  -7   4 1026.56   22.23
 -11   7   4 1084.24   23.30
  11  -7  -4 1043.62   24.13
 -11  -7   4 1057.23   21.20
 -11   7   3    1.11    0.99
  11  -7  -3    2.01    1.21
 -11   7   3    0.85    0.81
 -11  -7   3    0.44    0.62
 -11  -7   3   -0.22    0.49
 -11   7   2  262.93    8.65
  11  -7  -2  274.37    8.70
 -11   7   2  285.20    8.47
 -11  -7   2  267.94    6.42
  11  -7  -2  254.89    8.50
 -11  -7   2  265.66    7.27
 -11   7   2  268.11    8.11
  11  -7  -2  247.47    8.61
 -11   7   1   36.52    2.72
 -11   7   1   35.91    2.61
 -11  -7   1   33.52    1.64
  11  -7  -1   36.61    2.70
 -11  -7   1   35.52    2.15
  11  -7  -1   36.44    2.67
 -11   7   1   36.48    2.80
  11  -7  -1   31.73    2.76
  11  -7   0  433.64   12.58
 -11   7   0  451.16   12.17
  11   7   0  449.08   11.11
  11   7   0  425.28    9.65
 -11  -7   0  439.70   10.92
 -11  -7   0  433.80    9.90
  11  -7   0  468.49   11.89
  11  -7   0  432.07   11.64
 -11   7   0  476.04   12.21
  11  -7   1   97.22    5.11
  11   7   1  106.10    3.20
 -11   7  -1  100.95    4.88
 -11  -7  -1  103.75    4.25
 -11   7  -1  108.07    4.92
  11   7   1  104.53    4.12
  11  -7   1  104.85    4.52
  11   7   2    1.58    0.59
 -11   7  -2    1.41    1.43
 -11  -7  -2    0.21    0.85
  11  -7   2    1.44    1.30
  11   7   2    2.62    0.85
 -11  -7  -2    2.15    0.80
  11  -7   3  145.45    6.57
 -11   7  -3  148.42    6.52
  11   7   3  159.12    5.10
 -11  -7  -3  150.75    5.03
  11   7   3  148.67    4.19
 -11  -7  -3  136.90    5.58
 -11   7  -4 1471.32   35.05
 -11  -7  -4 1508.91   33.68
  11   7   4 1565.80   32.12
  11  -7   4 1585.91   35.30
 -11  -7  -4 1677.27   32.86
  11   7   4 1600.02   31.12
  11  -7   5  498.60   14.69
  11   7   5  505.63   11.93
 -11   7  -5  489.62   14.85
 -11  -7  -5  472.03   13.48
 -11  -7  -5  516.88   12.84
  11   7   6   65.20    3.11
  11  -7   6   71.86    4.82
 -11  -7  -6   63.82    4.13
 -11   7  -6   66.27    4.73
  11   7   6   63.44    2.78
 -11  -7  -6   67.26    3.65
  11  -7   7    3.55    1.75
  11   7   7    2.21    1.06
 -11  -7  -7    1.16    1.34
  11   7   7    1.25    0.89
 -11  -7  -7   -0.55    1.06
  11  -7   8 1083.92   27.55
  11   7   8 1133.07   23.82
 -11  -7  -8 1115.67   25.53
  11   7   8 1140.58   23.98
  11   7   9    2.60    1.14
  11  -7   9    1.92    1.51
  11   7   9    3.85    1.33
 -11  -7  -9    3.13    1.24
  11  -7  10    9.94    2.19
  11   7  10   12.80    1.78
 -11  -7 -10   10.26    1.98
  11   7  10   10.99    1.62
  11  -7  11    2.91    2.01
  11   7  11    1.69    1.26
 -11  -7 -11   -0.12    1.30
  11   7  11    4.13    1.56
 -11   9  10  204.70    8.00
 -11   9  10  213.94    8.05
 -11  -9  10  201.10    7.52
  11  -9 -10  194.20    7.95
 -11   9   9   29.49    2.82
  11  -9  -9   27.07    2.82
 -11   9   9   26.34    2.73
 -11  -9   9   23.45    2.50
 -11   9   8  493.43   13.70
 -11  -9   8  467.37   13.46
  11  -9  -8  468.44   14.09
  11  -9  -7   10.85    2.02
 -11   9   7   15.97    2.14
 -11  -9   7   11.40    1.83
 -11   9   7   14.15    2.06
  11  -9  -6   10.94    2.13
 -11   9   6    7.32    1.65
 -11   9   6    7.27    1.61
 -11  -9   6    5.98    1.50
 -11   9   5   37.60    3.03
 -11   9   5   32.96    2.88
  11  -9  -5   32.41    3.17
  11  -9  -4  294.78   10.33
 -11   9   4  307.79    9.68
 -11   9   4  305.25    9.70
 -11   9   3  265.79    8.73
  11  -9  -3  240.84    9.19
 -11   9   3  255.90    8.67
 -11   9   2    5.05    1.46
  11  -9  -2    8.22    2.02
 -11   9   2    7.92    1.85
 -11  -9   2    4.56    1.08
 -11   9   1  196.48    7.50
  11   9  -1  183.64    5.68
 -11  -9   1  177.37    6.49
 -11   9   1  194.80    7.44
  11  -9  -1  187.28    7.86
 -11   9   0 1355.98   29.12
  11   9   0 1246.35   25.70
 -11   9   0 1325.79   28.92
  11  -9   0 1271.10   29.66
  11  -9   1  176.88    7.73
  11   9   1  173.07    6.39
 -11   9  -1  189.12    7.62
  11   9   1  164.49    5.13
 -11  -9  -1  151.60    6.29
 -11   9  -1  166.92    7.18
  11  -9   2    1.21    1.63
  11   9   2    0.67    0.70
 -11  -9  -2   -0.85    1.24
  11   9   2    0.24    0.99
  11  -9   3    8.38    2.08
  11   9   3    4.97    0.93
  11   9   3    4.66    1.30
 -11   9  -3    7.76    1.99
  11  -9   4  233.73    9.61
  11   9   4  241.77    7.67
 -11   9  -4  242.19    9.80
 -11  -9  -4  236.75    7.47
  11   9   4  234.30    6.57
  11   9   5    3.99    0.96
  11  -9   5    4.27    1.90
 -11   9  -5    4.13    1.78
  11   9   5    4.51    1.27
 -11  -9  -5    4.73    1.45
  11  -9   6   69.00    5.17
 -11   9  -6   66.13    5.27
  11   9   6   74.91    3.78
 -11  -9  -6   69.26    3.91
  11   9   6   69.43    3.12
  11   9   7   10.96    1.66
  11  -9   7   12.71    2.73
 -11  -9  -7   17.51    2.21
  11   9   7   12.11    1.41
  11  -9   8  103.10    6.67
  11   9   8  106.99    4.31
 -11  -9  -8  110.85    5.48
  11   9   8  105.62    4.77
 -11  11   4   87.30    5.16
 -11 -11   4   83.34    5.27
  11 -11  -4   92.79    5.83
 -11  11   3  284.87   10.40
 -11  11   3  278.66   10.17
  11 -11  -3  308.20   11.38
  11 -11  -2    6.06    2.01
 -11  11   2    7.57    2.18
 -11  11   2    5.47    1.80
 -11  11   1   44.39    3.80
 -11  11   1   38.98    3.83
  11 -11  -1   40.24    3.98
 -11  11   0  111.94    6.16
  11 -11   0   96.34    6.19
 -11  11   0   95.63    5.77
  11 -11   1   31.98    3.51
 -11  11  -1   32.64    3.53
  11 -11   2   36.90    3.86
  11  11   2   32.57    3.03
 -11  11  -2   34.88    3.77
 -12   0  17   -0.07    1.64
 -12   0  17    1.64    1.68
  12   0 -17   -0.35    1.42
  12   0 -16  103.33    5.38
 -12   0  16  113.13    6.87
 -12   0  16  106.20    6.46
 -12   0  15    0.36    1.51
  12   0 -15   -0.79    1.23
 -12   0  15    0.21    1.46
 -12   0  14  403.91   12.85
 -12   0  14  390.76   13.17
  12   0 -14  381.36   11.25
  12   0 -13   -0.19    1.13
 -12   0  13    2.00    1.23
 -12   0  13    1.40    1.23
 -12   0  12  187.73    7.44
 -12   0  12  187.88    7.73
  12   0 -12  181.11    6.36
 -12   0  11    0.21    1.16
  12   0 -11    0.41    0.83
 -12   0  11   -0.50    1.08
 -12   0  10  163.77    6.17
 -12   0  10  153.30    6.30
  12   0 -10  149.38    5.20
  12   0  -9    0.26    0.60
 -12   0   9   -0.73    1.11
 -12   0   8  192.84    6.36
 -12   0   8  197.47    6.67
  12   0  -8  201.29    5.68
 -12   0   7    0.65    0.31
  12   0  -7    0.87    0.42
 -12   0   7    0.04    0.70
  12   0  -7    1.07    0.62
 -12   0   7    0.35    0.75
 -12   0   6 2330.76   47.03
  12   0  -6 2465.36   46.11
 -12   0   6 2326.78   46.80
 -12   0   6 2388.23   45.53
 -12   0   5    1.20    0.64
 -12   0   5    0.78    0.40
  12   0  -5    0.16    0.52
 -12   0   5    0.44    0.50
 -12   0   5    1.05    0.40
 -12   0   4  176.52    4.97
  12   0  -4  173.49    5.20
  12   0  -4  179.07    5.18
  12   0  -4  178.03    5.16
 -12   0   4  177.30    4.76
 -12   0   4  177.86    4.66
 -12   0   4  182.96    4.88
 -12   0   3    1.93    0.46
 -12   0   3   -0.03    0.53
  12   0  -3    0.30    0.67
 -12   0   3    0.66    0.35
  12   0  -3    0.98    0.46
  12   0  -3    0.78    0.51
 -12   0   3    0.42    0.38
 -12   0   2 1613.76   32.38
  12   0  -2 1589.96   32.62
 -12   0   2 1645.83   30.53
  12   0  -2 1632.74   31.03
  12   0  -2 1606.16   31.29
 -12   0   2 1585.25   31.00
  12   0  -1    0.58    0.29
 -12   0   1   -0.02    0.34
 -12   0   1    0.56    0.60
  12   0  -1    0.90    0.72
  12   0  -1   -0.22    0.42
 -12   0  -1    0.25    0.55
  12   0   1   -0.16    0.68
 -12   0  -1    0.60    0.41
  12   0   1    0.14    0.22
  12   0   2  894.05   17.25
  12   0   2  912.18   17.98
 -12   0  -2  885.85   19.73
  12   0   2  858.28   20.01
 -12   0  -2  859.77   18.13
 -12   0  -3    0.17    0.65
  12   0   3    0.43    0.48
  12   0   3    0.35    0.90
 -12   0  -4 3442.46   69.31
  12   0   4 3373.73   69.66
 -12   0  -5    0.20    0.73
  12   0   5    0.67    0.58
  12   0   5    0.14    0.79
 -12   0  -6 1571.42   33.69
  12   0   6 1581.37   32.28
  12   0   6 1586.44   34.27
 -12   0  -7    0.34    0.90
  12   0   7   -0.18    0.72
  12   0   7   -0.60    1.10
  12   0   7   -0.75    0.93
 -12   0  -8 1216.90   26.96
  12   0   8 1211.07   26.00
  12   0   8 1228.87   27.76
  12   0   8 1130.26   26.38
 -12   0  -9   -0.58    1.15
  12   0   9   -0.53    0.94
  12   0   9    0.30    1.26
  12   0   9    0.04    1.03
 -12   0 -10    9.57    1.74
  12   0  10   10.65    1.57
  12   0  10   15.74    2.35
  12   0  10   12.19    1.98
 -12   0 -11   -0.22    1.03
  12   0  11    0.24    1.26
  12   0  11    0.26    1.25
  12   0  12 1380.67   32.04
  12   0  12 1357.93   32.08
  12   0  13    0.56    1.46
  12   0  14   25.24    3.28
  12   0  15    0.49    1.83
 -12  -2  17   44.25    4.57
 -12   2  17   35.54    3.93
 -12  -2  17   41.20    4.58
  12   2 -17   34.38    3.07
  12  -2 -17   31.60    3.32
 -12   2  17   45.79    4.48
 -12  -2  16  257.38   10.81
 -12   2  16  255.38   10.44
 -12  -2  16  265.09   11.45
  12   2 -16  254.20    8.81
  12  -2 -16  268.48    9.56
 -12   2  16  256.24   10.56
 -12   2  15    4.56    2.02
 -12  -2  15    0.58    1.45
 -12   2  15    0.89    1.36
 -12  -2  15    0.22    1.56
  12   2 -15    0.45    1.12
  12  -2 -15    0.59    1.27
 -12  -2  14  281.53   10.54
 -12   2  14  269.12   10.09
 -12  -2  14  296.51   11.30
  12   2 -14  278.74    8.68
  12  -2 -14  277.40    9.29
 -12   2  14  272.46   10.27
  12   2 -13   17.96    1.84
 -12   2  13   17.74    2.43
 -12  -2  13   18.22    2.52
 -12  -2  13   24.27    3.05
  12  -2 -13   17.84    2.14
 -12   2  12   20.60    2.54
 -12  -2  12   13.96    2.12
 -12  -2  12   17.46    2.53
  12   2 -12   13.54    1.52
  12  -2 -12   15.92    1.98
  12  -2 -11   55.66    3.24
  12  -2 -11   56.92    1.64
  12   2 -11   57.24    2.88
 -12  -2  11   51.65    3.57
 -12  -2  11   56.54    3.94
 -12   2  11   59.84    3.75
 -12   2  11   54.83    3.70
  12  -2 -10  611.65   12.64
 -12  -2  10  595.53   15.49
  12  -2 -10  608.88   16.62
 -12  -2  10  622.85   16.23
 -12   2  10  621.94   15.48
  12   2 -10  610.46   13.71
  12  -2 -10  595.92   14.57
 -12   2  10  587.75   15.47
 -12   2   9  249.56    7.99
  12  -2  -9  259.06    6.26
 -12  -2   9  244.74    7.84
  12  -2  -9  238.81    8.68
 -12  -2   9  258.47    8.52
 -12   2   9  252.46    7.89
  12   2  -9  249.87    6.55
  12  -2  -9  252.21    7.43
 -12   2   8   51.58    3.00
  12  -2  -8   52.95    2.30
 -12  -2   8   57.19    2.01
 -12  -2   8   57.52    3.03
 -12  -2   8   56.30    3.37
  12  -2  -8   52.10    3.46
 -12   2   8   49.74    2.95
  12   2  -8   53.99    2.19
  12  -2  -8   57.34    2.88
  12  -2  -7  111.00    3.72
 -12   2   7  108.74    4.31
 -12  -2   7  117.54    3.58
  12  -2  -7  104.89    4.80
 -12  -2   7  110.11    4.20
 -12  -2   7  121.72    4.76
  12  -2  -7  116.52    4.97
 -12   2   7  117.31    4.41
  12   2  -7  114.72    3.22
  12  -2  -7  117.39    4.20
  12  -2  -6  517.14   11.69
 -12   2   6  524.66   12.13
 -12  -2   6  511.81   11.63
 -12  -2   6  517.19   12.41
 -12  -2   6  521.97   11.82
  12  -2  -6  505.75   12.88
  12  -2  -6  510.90   12.99
 -12   2   6  523.81   12.13
 -12   2   6  490.23   12.22
 -12   2   6  502.68   11.34
 -12  -2   5   15.77    1.36
 -12   2   5   16.37    1.33
 -12  -2   5   15.06    1.34
 -12  -2   5   14.53    1.17
  12  -2  -5   15.04    1.56
  12  -2  -5   14.77    1.31
 -12   2   5   15.62    1.37
  12  -2  -5   16.87    1.63
 -12   2   5   14.65    1.31
 -12   2   5   15.96    1.22
  12  -2  -4  320.55    8.54
 -12   2   4  337.78    8.16
 -12  -2   4  342.85    8.75
 -12  -2   4  348.90    8.23
 -12   2   4  329.92    8.01
 -12  -2   4  339.98    7.62
  12  -2  -4  355.72    9.00
 -12   2   4  331.52    8.20
 -12   2   4  341.28    8.50
  12  -2  -4  344.19    8.80
  12  -2  -3   73.27    2.97
  12  -2  -3   69.17    3.15
 -12  -2   3   74.85    3.33
 -12  -2   3   74.02    2.53
  12  -2  -3   73.30    3.12
 -12  -2   3   76.38    2.12
 -12   2   3   71.24    2.77
 -12   2   3   74.42    2.58
 -12  -2   3   74.27    1.81
 -12   2   3   77.58    3.00
 -12   2   3   74.94    2.90
 -12   2   2  202.18    5.60
  12  -2  -2  188.32    5.94
 -12   2   2  201.14    4.90
  12  -2  -2  186.82    5.21
 -12  -2   2  188.78    4.10
 -12  -2   2  186.54    6.00
 -12  -2   2  192.42    4.44
  12  -2  -2  183.52    5.44
 -12  -2   2  195.46    4.00
 -12   2   2  188.91    5.21
 -12   2   1 3552.19   70.90
  12  -2  -1 3801.72   71.79
 -12  -2   1 3594.24   71.85
 -12   2   1 3490.32   69.83
  12  -2  -1 3736.04   70.57
 -12   2   1 3552.30   70.40
 -12   2   0 5059.84   99.29
 -12   2   0 5324.27   98.90
  12  -2   0 5125.33  100.07
 -12  -2   0 5413.15  100.50
  12  -2   0 5170.90   98.64
 -12   2  -1   81.02    3.39
 -12   2  -1   74.52    3.05
  12  -2   1   76.68    3.64
 -12  -2  -1   77.67    3.83
  12   2   1   77.32    3.82
  12   2   1   77.67    2.01
  12  -2   1   76.03    2.89
  12  -2   1   76.80    2.58
  12  -2   2  492.47   10.81
  12  -2   2  472.30   12.19
 -12   2  -2  472.84   11.47
  12   2   2  486.67    9.67
 -12   2  -2  478.82   11.18
 -12  -2  -2  477.36   12.39
  12  -2   2  472.55   10.19
  12   2   2  491.94    9.25
  12  -2   3  132.73    4.18
 -12   2  -3  124.12    4.66
  12   2   3  118.78    3.26
  12  -2   3  123.55    5.11
 -12  -2  -3  128.74    5.32
  12   2   3  125.90    3.56
 -12   2  -3  118.11    4.37
  12   2   3  113.25    5.06
  12  -2   3  120.28    3.66
 -12   2  -4  356.69    9.59
  12  -2   4  352.45    8.79
  12  -2   4  346.48   10.23
 -12  -2  -4  353.16   10.40
  12   2   4  356.43    8.32
 -12   2  -4  343.65    9.33
  12  -2   4  337.11    8.24
  12   2   4  352.79   10.39
  12   2   4  343.76    8.04
 -12   2  -5  139.78    5.25
  12  -2   5  139.08    4.76
  12  -2   5  136.25    5.77
 -12  -2  -5  141.63    5.95
  12  -2   5  136.42    4.36
  12   2   5  142.29    4.49
 -12   2  -6  233.16    7.34
  12  -2   6  228.94    6.89
  12   2   6  220.81    6.53
  12  -2   6  219.41    7.95
 -12  -2  -6  215.52    7.95
 -12   2  -7    0.40    0.92
 -12  -2  -7    0.15    0.95
  12  -2   7    0.71    1.01
  12  -2   7    1.47    0.94
  12   2   7    0.57    0.71
 -12   2  -8  421.15   11.62
  12  -2   8  433.84   11.47
 -12  -2  -8  434.67   12.79
  12  -2   8  437.33   12.89
  12   2   8  416.50   11.41
 -12   2  -9  311.47    9.42
 -12  -2  -9  289.24   10.15
  12  -2   9  295.01   10.23
  12   2   9  295.27    9.23
 -12   2 -10    1.83    1.05
 -12  -2 -10    0.70    1.06
  12  -2  10    0.97    1.22
  12   2  10    0.83    1.17
 -12   2 -11  180.21    6.86
  12  -2  11  169.00    7.70
  12   2  11  185.30    7.44
  12   2  12  554.36   15.69
  12  -2  12  533.37   16.18
  12  -2  12  560.40   16.97
  12   2  13   13.52    2.45
  12  -2  13   12.55    2.31
  12  -2  13   15.00    2.80
  12  -2  14  169.38    8.05
  12  -2  14  162.16    8.63
  12   2  14  163.50    7.82
  12  -2  15  106.24    6.32
  12  -2  15  108.35    7.33
  12   2  15  108.36    6.51
 -12   4  16  119.71    6.70
 -12  -4  16  147.16    8.56
 -12   4  16  131.39    6.96
  12  -4 -16  135.47    6.67
 -12   4  15    3.47    1.63
 -12  -4  15    8.25    2.53
 -12   4  15    5.37    1.79
  12  -4 -15    6.38    1.85
 -12   4  14   26.00    3.03
 -12   4  14   29.23    3.02
 -12  -4  14   29.95    3.72
  12  -4 -14   32.59    3.03
  12  -4 -13  181.04    5.22
 -12   4  13  177.87    7.49
  12  -4 -13  178.93    7.11
 -12  -4  13  182.77    8.62
  12  -4 -12   16.99    1.45
 -12   4  12   16.62    2.15
 -12  -4  12   14.55    2.59
 -12   4  12   14.87    2.13
  12  -4 -12   15.67    2.08
 -12  -4  11  110.85    3.12
  12  -4 -11  111.81    4.06
 -12   4  11  110.24    5.30
 -12  -4  11  117.07    3.47
 -12   4  11  117.55    5.46
  12  -4 -11  124.14    5.34
  12  -4 -10   84.45    3.51
 -12   4  10   87.32    4.42
 -12  -4  10   90.71    3.43
 -12   4  10   95.03    4.61
  12  -4 -10   94.62    4.41
 -12  -4  10   92.97    2.98
  12  -4  -9  202.27    6.82
 -12   4   9  197.10    6.85
 -12  -4   9  196.47    6.05
  12  -4  -9  186.93    7.89
 -12   4   9  206.23    7.00
  12  -4  -9  197.31    6.06
  12   4  -9  203.58    5.07
 -12  -4   9  196.58    5.41
  12  -4  -8   40.33    2.35
 -12  -4   8   37.51    2.38
 -12   4   8   46.58    2.82
  12  -4  -8   43.15    3.35
  12   4  -8   42.57    1.49
 -12   4   8   40.75    2.74
  12  -4  -8   43.90    3.40
  12  -4  -7  260.77    7.39
 -12  -4   7  263.05    7.10
 -12  -4   7  262.48    7.71
 -12   4   7  252.25    7.57
  12  -4  -7  266.55    8.91
 -12   4   7  264.71    7.72
  12  -4  -7  264.23    8.94
  12  -4  -6  260.18    7.41
 -12  -4   6  261.47    6.61
 -12  -4   6  261.07    7.71
  12  -4  -6  248.08    8.37
 -12   4   6  257.28    7.21
 -12   4   6  255.47    7.37
 -12   4   6  229.84    7.78
  12  -4  -6  266.62    8.52
 -12   4   5    4.48    0.90
  12  -4  -5    3.79    0.84
 -12  -4   5    4.11    0.63
 -12  -4   5    3.40    1.01
  12  -4  -5    1.74    0.89
 -12   4   5    3.35    0.86
  12  -4  -4  129.33    4.73
  12  -4  -4  123.13    4.89
 -12  -4   4  119.22    3.62
 -12  -4   4  119.19    3.10
 -12  -4   4  123.11    4.99
  12  -4  -4  123.74    4.95
 -12   4   4  115.39    4.21
 -12   4   4  123.69    4.74
 -12   4   4  122.04    4.52
  12  -4  -3 1397.56   29.26
 -12  -4   3 1407.39   27.21
 -12   4   3 1383.00   28.06
  12  -4  -3 1424.16   29.12
 -12  -4   3 1442.22   29.98
  12  -4  -3 1339.24   29.20
 -12   4   3 1312.37   28.35
 -12   4   3 1416.94   28.92
 -12  -4   3 1489.29   26.28
 -12   4   3 1362.98   28.96
  12  -4  -2  114.42    4.67
 -12  -4   2  122.27    3.29
 -12   4   2  118.97    3.99
 -12  -4   2  118.05    5.05
  12  -4  -2  131.48    4.53
  12  -4  -2  109.98    4.39
 -12   4   2  117.44    4.24
  12  -4  -1  549.88   14.04
 -12  -4   1  587.62   11.50
 -12  -4   1  565.28   14.66
  12  -4  -1  576.86   13.25
 -12  -4   1  565.01   11.87
  12  -4  -1  595.83   13.54
 -12   4   1  574.91   13.05
 -12   4   1  572.91   13.63
 -12   4   1  589.42   13.54
 -12   4   0  255.41    7.44
  12  -4   0  255.71    8.01
 -12  -4   0  257.46    6.03
 -12  -4   0  269.79    8.66
 -12   4   0  241.06    6.97
  12  -4   0  274.98    7.33
  12  -4   0  267.40    7.04
 -12   4   0  277.59    7.71
  12  -4   1  661.98   14.20
  12  -4   1  649.47   15.78
 -12   4  -1  605.64   14.91
  12   4   1  638.99   13.07
 -12  -4  -1  639.20   16.35
 -12   4  -1  629.71   14.54
  12  -4   1  654.76   14.58
 -12   4  -1  641.52   15.04
 -12  -4  -1  632.34   13.41
  12  -4   2  167.01    6.33
 -12   4  -2  165.22    5.92
  12  -4   2  171.81    5.13
  12   4   2  171.32    4.31
 -12  -4  -2  174.16    6.89
 -12   4  -2  180.04    5.99
  12   4   2  169.04    3.80
 -12  -4  -2  174.80    4.83
  12  -4   2  174.48    5.41
  12  -4   3   62.30    3.70
 -12   4  -3   63.24    3.49
 -12   4  -3   63.75    3.34
 -12  -4  -3   65.60    4.08
  12   4   3   65.36    2.18
 -12  -4  -3   68.07    2.81
  12  -4   3   60.30    2.77
  12   4   3   63.98    2.23
  12  -4   3   69.26    3.10
  12  -4   4  568.64   13.14
  12  -4   4  556.02   15.11
 -12   4  -4  554.23   14.62
 -12  -4  -4  570.84   15.75
 -12  -4  -4  579.96   13.37
  12   4   4  594.24   12.55
  12   4   4  580.41   12.30
 -12   4  -4  586.31   14.18
  12  -4   4  568.58   13.53
  12  -4   5  444.57   11.53
  12  -4   5  455.53   13.14
 -12  -4  -5  486.31   13.90
 -12   4  -5  477.24   12.94
  12   4   5  453.45   10.50
  12  -4   5  471.81   11.29
 -12  -4  -5  459.17   11.58
  12   4   5  474.74   10.97
 -12   4  -5  488.28   12.26
  12  -4   6   28.32    2.81
 -12  -4  -6   27.92    2.93
  12   4   6   28.38    1.83
  12  -4   6   30.74    2.33
  12   4   6   30.82    2.08
  12  -4   6   29.30    2.11
 -12   4  -6   32.82    2.50
  12  -4   7  227.68    7.42
  12  -4   7  231.63    8.84
  12   4   7  234.88    6.82
 -12  -4  -7  229.12    9.03
  12  -4   7  245.12    7.30
  12   4   7  244.87    7.42
 -12   4  -7  238.30    7.80
  12   4   8  386.74   10.15
  12  -4   8  372.76   12.17
 -12  -4  -8  366.99   12.46
  12   4   8  407.54   10.83
  12  -4   8  374.26   10.32
 -12   4  -8  363.28   10.73
  12   4   9  334.52    9.52
  12  -4   9  325.42   11.29
  12   4   9  331.88    9.99
 -12   4  -9  316.51    9.85
  12   4  10  355.65   10.35
  12  -4  10  355.67   12.18
  12   4  10  341.21   10.73
  12   4  11   34.23    2.81
  12  -4  11   36.51    3.62
  12   4  11   30.91    3.02
  12   4  12   68.27    4.18
  12  -4  12   77.25    5.29
  12   4  12   67.24    4.55
  12   4  13  100.17    5.38
  12  -4  13  100.37    6.27
  12   4  13  107.46    5.98
  12   4  14    3.59    1.45
  12  -4  14    8.01    2.28
  12   4  14    4.06    1.86
 -12   6  14   23.42    2.89
 -12   6  14   21.21    2.87
  12  -6 -14   23.37    2.94
  12  -6 -13  679.12   17.97
 -12   6  13  666.06   17.72
 -12   6  13  668.27   17.82
  12  -6 -13  651.41   15.94
 -12  -6  12   45.64    2.46
 -12   6  12   51.72    3.73
 -12   6  12   53.97    3.89
  12  -6 -12   54.89    3.90
  12  -6 -12   50.65    3.10
 -12  -6  11  304.90    9.24
  12  -6 -11  306.93   10.01
 -12   6  11  315.02    9.86
 -12   6  11  298.34    9.77
 -12  -6  11  291.28    8.10
  12  -6 -11  299.91    8.96
 -12  -6  10   37.80    2.61
 -12   6  10   44.63    3.17
 -12   6  10   34.58    2.88
 -12  -6  10   35.28    2.24
  12  -6 -10   38.77    2.69
 -12  -6   9  119.75    4.56
 -12  -6   9  113.74    4.84
 -12   6   9  114.52    5.07
 -12   6   9  121.32    5.23
 -12  -6   9  117.16    4.48
  12  -6  -9  113.65    4.86
  12  -6  -8    9.59    1.48
 -12   6   8    8.80    1.49
 -12  -6   8    8.71    1.15
 -12  -6   8    8.04    1.28
 -12   6   8    8.51    1.39
 -12  -6   7  475.98   11.86
 -12  -6   7  482.70   11.13
 -12   6   7  508.70   12.51
  12  -6  -7  467.43   12.58
  12  -6  -6   12.69    1.68
 -12  -6   6   12.19    1.07
  12  -6  -6   13.24    2.11
 -12   6   6   14.50    1.71
 -12   6   6   10.65    1.39
 -12  -6   6   11.65    1.31
  12  -6  -5    4.19    1.22
 -12  -6   5    3.94    0.89
 -12  -6   5    4.74    0.70
  12  -6  -5    2.16    1.10
 -12   6   5    4.55    1.01
  12  -6  -5    3.63    1.22
 -12   6   5    1.49    1.17
 -12   6   5    5.15    1.25
  12  -6  -4  126.94    5.70
 -12   6   4  139.37    4.93
 -12   6   4  120.19    5.38
 -12  -6   4  135.99    4.31
 -12   6   4  127.17    4.97
  12  -6  -4  147.71    5.72
 -12  -6   3 1410.24   27.59
  12  -6  -3 1336.36   29.73
 -12   6   3 1385.16   28.68
  12  -6  -3 1332.51   29.83
 -12  -6   3 1385.90   26.37
 -12   6   3 1335.06   29.64
 -12   6   3 1388.52   28.97
  12  -6  -3 1341.74   29.77
  12  -6  -2  220.16    7.69
  12  -6  -2  221.81    7.40
 -12  -6   2  225.39    5.05
  12  -6  -2  237.32    7.62
 -12   6   2  226.73    6.97
 -12   6   2  227.88    7.55
 -12  -6   2  231.86    6.13
 -12   6   2  229.12    7.19
 -12   6   1   63.71    3.50
 -12   6   1   71.73    3.53
  12  -6  -1   74.07    4.08
  12  -6  -1   80.29    3.83
 -12  -6   1   74.75    2.93
  12  -6  -1   75.54    3.72
 -12   6   1   76.39    3.97
  12  -6   0  542.75   12.86
 -12   6   0  541.53   13.09
  12   6   0  523.54   11.83
 -12  -6   0  508.24   11.79
  12  -6   0  510.79   13.85
  12  -6   0  527.96   12.93
 -12  -6   0  537.40   11.01
 -12   6   0  532.71   13.64
  12  -6   1 1108.20   23.00
  12   6   1 1099.65   20.45
 -12  -6  -1 1108.41   21.53
 -12  -6  -1 1050.52   22.21
 -12   6  -1 1130.13   23.82
  12   6   1 1093.18   21.99
  12  -6   1 1099.19   23.16
 -12   6  -1 1077.22   24.05
 -12  -6  -2  347.14    9.08
  12   6   2  346.07    8.49
  12  -6   2  326.13    9.10
 -12   6  -2  310.48   10.04
  12  -6   2  368.51   10.93
 -12  -6  -2  336.88   11.44
 -12  -6  -2  338.14    8.49
  12  -6   2  354.98    9.50
  12   6   2  366.89    7.46
  12  -6   3    1.32    1.33
  12   6   3    0.14    0.61
 -12   6  -3    3.00    1.40
 -12  -6  -3    0.75    1.30
 -12  -6  -3    1.24    0.78
 -12  -6  -3   -0.03    0.69
  12  -6   3    0.58    0.85
  12   6   3    0.47    0.42
 -12   6  -3    1.73    0.95
  12  -6   3    1.06    0.77
  12  -6   4  436.32   13.05
  12   6   4  445.23   10.29
 -12   6  -4  433.79   12.91
 -12  -6  -4  444.25   11.16
  12  -6   4  433.36   11.18
 -12  -6  -4  438.66   11.60
  12   6   4  440.47    9.59
 -12   6  -4  416.41   12.09
  12  -6   5 1076.42   25.58
 -12   6  -5 1044.11   25.45
 -12  -6  -5 1040.23   23.85
  12   6   5 1065.59   21.61
  12   6   5 1065.58   22.05
  12  -6   6    1.16    1.35
  12   6   6    0.20    0.63
 -12   6  -6    0.26    1.28
  12   6   6    1.72    0.80
 -12  -6  -6    0.94    1.02
  12   6   7    1.48    0.79
  12  -6   7    1.60    1.44
 -12  -6  -7    0.14    1.01
  12   6   7    2.57    1.00
  12  -6   8  166.21    7.79
 -12  -6  -8  159.83    6.96
  12   6   8  173.87    5.92
  12   6   8  165.30    5.59
  12  -6   9   68.02    5.02
 -12  -6  -9   59.82    4.28
  12   6   9   73.99    3.64
  12   6   9   69.98    3.74
  12  -6  10  140.13    7.54
  12   6  10  150.99    5.75
  12   6  10  150.24    6.06
  12  -6  11  196.79    9.27
  12   6  11  193.61    7.05
  12   6  11  202.04    7.57
  12  -6  12   34.08    3.86
  12   6  12   32.35    2.84
  12   6  12   33.92    3.08
 -12   8  12   33.82    3.20
 -12   8  12   32.04    3.10
  12  -8 -12   32.20    2.93
 -12  -8  11   36.00    2.78
 -12   8  11   38.94    3.31
 -12   8  11   42.00    3.38
  12  -8 -11   38.33    3.12
 -12   8  10   28.35    2.78
 -12  -8  10   25.60    2.31
  12  -8 -10   29.27    2.78
 -12   8   9   85.55    4.63
 -12  -8   9   80.02    4.20
 -12   8   9   78.94    4.38
  12  -8  -9   78.80    4.54
 -12  -8   8   85.06    4.39
  12  -8  -8   83.50    4.70
 -12   8   8   82.83    4.36
 -12   8   8   84.66    4.50
 -12   8   7  290.73    9.02
 -12   8   7  294.14    9.16
 -12  -8   7  267.22    7.30
  12  -8  -7  301.02    9.73
 -12   8   6  166.07    6.20
 -12  -8   6  147.75    5.43
 -12   8   6  156.53    6.19
  12  -8  -6  160.58    6.70
 -12   8   5  360.10   10.24
 -12  -8   5  343.47    8.17
 -12   8   5  357.38   10.28
  12  -8  -5  371.18   11.16
  12  -8  -4   21.03    2.47
 -12  -8   4   15.70    1.59
 -12   8   4   23.09    2.28
 -12  -8   4   15.52    1.21
 -12   8   4   20.26    2.21
 -12  -8   3  280.71    6.79
 -12   8   3  257.75    8.54
 -12   8   3  280.66    8.98
  12  -8  -3  278.95    9.68
 -12   8   2   50.98    3.37
 -12   8   2   47.23    3.21
 -12  -8   2   44.60    2.09
 -12  -8   2   47.39    2.67
  12  -8  -2   44.27    3.46
  12  -8  -1   12.09    2.06
 -12   8   1   16.87    2.15
 -12  -8   1   14.22    1.17
 -12  -8   1   17.73    1.80
 -12   8   1   16.93    2.02
  12  -8   0   16.14    2.39
 -12   8   0   18.86    2.22
 -12   8   0   15.57    1.99
  12   8   0   15.23    1.16
 -12  -8   0   19.45    1.92
  12  -8   1  921.86   22.94
  12   8   1  911.09   18.83
 -12  -8  -1  859.93   20.79
 -12   8  -1  944.66   22.42
  12   8   1  937.95   20.68
  12  -8   2  143.60    6.77
  12   8   2  143.83    4.19
 -12   8  -2  152.98    6.69
  12   8   2  151.03    5.37
  12   8   3    2.77    0.66
  12  -8   3    2.97    1.72
 -12  -8  -3    2.59    1.09
 -12   8  -3    2.98    1.73
  12   8   3    3.09    1.01
 -12  -8  -3    1.57    0.82
  12  -8   4  211.71    8.85
  12   8   4  223.51    6.86
 -12  -8  -4  220.32    6.90
 -12  -8  -4  201.42    7.75
  12   8   4  211.43    5.73
  12  -8   5  675.44   18.94
 -12  -8  -5  695.03   16.28
 -12   8  -5  683.97   19.21
  12   8   5  686.99   15.71
  12  -8   6    4.41    1.82
 -12  -8  -6    4.26    1.26
 -12   8  -6    1.68    1.59
 -12  -8  -6    3.18    1.38
  12   8   6    4.23    0.91
  12   8   6    4.42    1.16
  12  -8   7    0.68    1.59
 -12  -8  -7   -0.03    1.08
  12   8   7    1.37    0.81
  12   8   7    1.36    0.91
  12  -8   8    0.55    1.53
  12   8   8    1.04    1.00
  12   8   8   -0.55    0.81
 -12  -8  -8   -0.69    1.38
  12  -8   9  350.01   13.38
  12   8   9  339.47    9.56
 -12  -8  -9  371.45   11.66
  12   8   9  361.09   10.05
  12  -8  10  153.58    8.59
  12   8  10  167.53    6.08
 -12  -8 -10  161.06    7.28
  12 -10  -8    7.80    1.99
 -12 -10   8    8.04    1.73
 -12  10   8   10.97    2.15
 -12  10   7   80.56    4.72
 -12 -10   7   71.09    4.54
 -12  10   7   74.00    4.59
  12 -10  -7   73.26    5.01
 -12  10   6   88.58    5.02
 -12 -10   6   80.21    4.96
 -12  10   6   95.46    5.16
  12 -10  -6   98.59    5.73
  12 -10  -5   69.07    4.82
 -12  10   5   68.08    4.36
 -12  10   5   76.66    4.62
 -12  10   4  114.12    5.69
  12 -10  -4  118.04    6.35
 -12  10   4  101.70    5.42
 -12  10   3  169.18    7.26
 -12  10   3  195.85    7.69
  12 -10  -3  177.92    8.07
 -12  10   2  285.76    9.86
 -12  10   2  281.03    9.88
  12 -10  -2  259.19   10.23
  12 -10  -1    0.46    1.56
 -12  10   1    0.16    1.48
 -12  10   1    0.26    1.41
 -12  10   0   56.57    4.22
  12 -10   0   55.22    4.48
 -12  10   0   53.96    4.19
 -12  10  -1  175.60    7.99
  12 -10   1  192.34    8.75
  12 -10   2  254.99   10.51
 -12  10  -2  277.63   10.56
  12  10   2  271.93    8.96
  12 -10   3    2.77    2.02
 -12  10  -3    1.73    1.92
  12  10   3    0.91    1.10
  12 -10   4  171.90    8.50
 -12  10  -4  183.73    8.77
  12  10   4  162.21    6.46
  12 -10   5   89.70    6.12
  12  10   5   95.88    4.66
 -12  10  -5   85.31    6.17
  12 -10   6   23.76    3.43
 -12  10  -6   16.00    3.00
 -12 -10  -6   26.69    2.57
  12  10   6   23.24    2.34
  13   1 -17  160.44    6.94
 -13  -1  17  167.19    8.66
 -13   1  17  162.34    8.32
 -13  -1  17  177.00    9.24
  13  -1 -17  162.22    7.29
 -13   1  17  185.03    9.02
  13  -1 -16   37.73    3.23
 -13   1  16   36.79    3.95
 -13  -1  16   30.62    3.56
  13   1 -16   31.56    2.79
 -13   1  16   33.67    3.77
 -13  -1  16   28.37    3.63
 -13  -1  15  108.22    6.29
 -13   1  15  109.49    6.17
 -13  -1  15  112.20    6.66
  13   1 -15  105.53    5.06
  13  -1 -15  113.60    5.43
 -13   1  15  104.75    6.26
 -13   1  14   27.41    3.16
 -13  -1  14   31.77    3.48
 -13  -1  14   29.05    3.18
 -13   1  14   33.32    3.33
  13   1 -14   30.03    2.53
  13  -1 -14   27.85    2.60
 -13  -1  13  267.67    9.64
 -13   1  13  259.37    9.44
 -13  -1  13  276.17   10.31
  13   1 -13  267.63    8.24
  13  -1 -13  268.37    8.61
 -13   1  13  281.61   10.04
 -13  -1  12  534.77   14.87
 -13   1  12  533.93   14.78
 -13  -1  12  545.88   15.57
  13   1 -12  545.37   13.30
  13  -1 -12  537.11   13.77
 -13   1  12  544.81   15.24
 -13  -1  11  312.75    9.86
 -13   1  11  287.13    9.55
 -13  -1  11  313.76   10.35
  13   1 -11  320.20    8.59
  13  -1 -11  313.01    8.90
 -13   1  11  316.77   10.08
 -13   1  10    3.01    1.22
 -13  -1  10    0.21    0.96
 -13   1  10   -1.25    1.26
 -13  -1  10    0.94    1.09
  13   1 -10    0.30    0.61
  13  -1 -10    0.34    0.73
  13  -1  -9  959.80   18.75
  13   1  -9  959.13   19.90
 -13  -1   9  930.02   21.31
 -13   1   9  950.61   21.48
 -13   1   9  935.84   21.74
 -13  -1   9  901.37   21.77
  13  -1  -9  962.12   20.53
 -13  -1   8  125.19    3.02
  13  -1  -8  108.36    3.51
  13  -1  -8  121.42    5.30
 -13  -1   8  124.98    4.71
 -13   1   8  120.39    4.69
 -13  -1   8  118.92    4.93
  13   1  -8  125.88    3.88
  13  -1  -8  121.89    4.26
 -13   1   8  118.68    4.84
  13   1  -7  162.89    4.46
 -13  -1   7  165.29    4.28
  13  -1  -7  169.06    4.73
  13  -1  -7  164.05    5.98
 -13  -1   7  154.38    5.20
 -13   1   7  154.31    5.28
 -13  -1   7  154.92    5.53
  13  -1  -7  164.57    5.00
 -13   1   7  161.09    5.48
 -13  -1   6   34.09    1.76
  13  -1  -6   35.07    1.94
  13  -1  -6   37.39    2.47
  13  -1  -6   36.38    2.39
 -13  -1   6   32.52    1.89
 -13   1   6   34.78    2.06
 -13  -1   6   32.86    2.11
 -13   1   6   34.87    2.01
 -13   1   6   35.99    2.15
 -13   1   6   38.42    1.73
 -13   1   5 3700.92   68.46
 -13  -1   5 3713.02   68.48
  13  -1  -5 3609.37   68.71
  13   1  -5 3678.52   68.59
  13  -1  -5 3547.12   69.16
  13  -1  -5 3521.43   69.16
 -13  -1   5 3442.82   67.99
 -13  -1   5 3438.40   68.43
 -13   1   5 3811.42   68.51
 -13   1   5 3306.66   68.26
 -13   1   5 3535.79   67.91
 -13   1   4    0.78    0.47
 -13  -1   4    0.98    0.64
  13  -1  -4    0.29    0.67
  13   1  -4    0.20    0.56
 -13   1   4    1.19    0.52
  13  -1  -4    1.16    0.65
 -13   1   4    0.38    0.48
  13  -1  -4    0.63    0.55
 -13  -1   4    2.29    0.43
 -13   1   4    0.57    0.44
 -13  -1   4    0.17    0.47
 -13   1   3  456.12   10.45
  13  -1  -3  441.50   10.95
 -13  -1   3  439.51   10.84
  13   1  -3  458.89   11.07
 -13  -1   3  444.00    9.44
  13   1  -3  432.17    9.82
 -13   1   3  448.35    9.54
  13  -1  -3  459.32   10.44
 -13  -1   3  439.63    9.35
  13  -1  -3  439.64   10.23
 -13   1   3  459.55    9.95
 -13  -1   3  443.73    9.31
 -13   1   2  437.34   10.42
  13  -1  -2  425.31   10.87
 -13  -1   2  429.07   10.79
 -13  -1   2  443.09    8.57
  13   1  -2  421.21   10.95
  13   1  -2  447.23    9.24
  13  -1  -2  424.99    9.87
 -13   1   2  432.12    9.67
 -13  -1   2  423.23    8.93
 -13   1   2  440.78    9.12
  13  -1  -2  422.61    9.58
 -13   1   1  971.24   20.23
  13  -1  -1  930.77   20.68
 -13  -1   1  934.52   20.58
  13  -1  -1  940.53   18.67
  13   1  -1  931.63   20.80
  13   1  -1  938.61   18.40
 -13   1   1  910.88   18.49
  13  -1  -1  958.37   19.26
 -13  -1   1  962.96   18.34
 -13   1   1  958.96   19.25
 -13   1   0    3.87    0.96
  13  -1   0    3.30    1.00
 -13  -1   0    3.38    0.95
 -13  -1   0    3.47    0.47
  13   1   0    4.63    1.08
 -13   1   0    3.15    0.44
 -13   1   0    1.75    0.55
  13   1   0    2.87    0.41
  13  -1   0    2.84    0.64
  13  -1   0    2.60    0.41
 -13   1  -1  275.43    7.83
  13  -1   1  275.14    6.10
 -13   1  -1  270.22    6.89
  13  -1   1  253.49    8.07
 -13  -1  -1  276.57    8.18
  13   1   1  271.29    8.31
  13  -1   1  271.57    6.69
  13   1   1  269.78    6.07
  13   1   2  542.45   11.15
 -13   1  -2  545.75   13.10
 -13  -1  -2  545.97   13.51
  13  -1   2  517.26   13.48
 -13   1  -2  497.86   11.86
  13   1   2  537.81   10.62
  13  -1   2  542.31   11.01
  13  -1   2  549.92   11.71
  13  -1   3 2112.24   41.13
 -13   1  -3 2250.75   42.98
  13   1   3 2125.61   40.64
 -13  -1  -3 2147.07   43.34
  13  -1   3 2086.09   43.41
  13   1   3 2080.96   43.54
 -13   1  -3 1982.79   41.50
  13   1   3 2158.89   40.43
  13  -1   3 2135.68   40.45
 -13   1  -4  145.99    5.52
  13  -1   4  146.56    4.62
  13  -1   4  147.78    4.16
 -13  -1  -4  143.88    5.78
  13   1   4  144.26    4.37
  13  -1   4  144.97    5.96
  13   1   4  141.38    5.97
  13   1   4  142.93    4.32
 -13   1  -5 1190.22   25.86
  13  -1   5 1202.96   24.48
 -13  -1  -5 1189.13   26.47
  13  -1   5 1135.53   26.43
  13   1   5 1143.95   24.12
  13   1   5 1168.91   26.69
  13   1   5 1169.39   24.32
 -13   1  -6  277.29    8.82
  13  -1   6  289.13    8.03
 -13  -1  -6  285.37    9.30
  13  -1   6  275.88    9.43
  13   1   6  300.29    7.95
  13   1   6  303.64    9.77
  13   1   6  275.24    7.94
 -13   1  -7  358.17   10.58
 -13  -1  -7  377.29   11.20
  13  -1   7  378.90    9.91
  13  -1   7  362.42   11.35
  13   1   7  352.11    9.59
  13   1   7  347.38   11.21
  13   1   7  350.91    9.84
 -13  -1  -8  283.91    9.45
  13  -1   8  259.47    8.08
  13  -1   8  258.86    9.38
  13   1   8  269.80    8.16
  13   1   8  258.36    9.38
 -13   1  -8  275.00    8.84
  13   1   8  256.92    8.27
 -13   1  -9  545.19   14.66
 -13  -1  -9  540.42   15.19
  13  -1   9  543.06   14.12
  13  -1   9  572.35   15.88
  13   1   9  548.26   14.12
  13   1   9  549.21   15.67
  13   1   9  557.40   14.57
 -13   1 -10  135.11    6.09
 -13  -1 -10  139.43    6.46
  13  -1  10  142.95    6.82
  13   1  10  137.83    5.89
  13   1  10  132.78    6.66
  13  -1  10  142.11    6.58
  13   1  10  141.18    6.21
  13  -1  11  187.02    8.23
  13  -1  11  207.12    8.45
  13   1  11  193.04    7.84
  13  -1  12  397.48   13.31
  13  -1  12  383.51   13.08
  13   1  12  387.99   12.66
  13  -1  13  303.06   11.35
  13  -1  13  306.54   11.65
  13   1  13  307.03   11.26
  13  -1  14    8.40    2.18
  13  -1  14    6.12    2.20
  13   1  14    8.07    2.09
 -13   3  16  209.73    9.20
 -13  -3  16  213.56    9.71
 -13  -3  16  213.03   10.38
 -13   3  16  227.38    9.46
  13   3 -16  206.50    7.46
  13  -3 -16  216.10    8.53
 -13   3  15    2.78    1.69
 -13  -3  15    1.58    1.57
 -13   3  15    8.43    2.22
 -13  -3  15    3.78    2.05
  13   3 -15    4.98    1.26
  13  -3 -15    6.58    1.67
 -13   3  14   35.61    3.37
 -13  -3  14   43.16    3.86
 -13  -3  14   54.31    4.67
 -13   3  14   46.98    3.89
  13   3 -14   44.04    2.85
  13  -3 -14   47.61    3.53
 -13   3  13  595.19   16.56
  13  -3 -13  608.90   15.75
 -13  -3  13  614.72   17.88
 -13   3  13  572.58   16.21
  13   3 -13  610.92   14.45
 -13   3  12  305.94   10.06
  13  -3 -12  296.21    7.10
 -13  -3  12  311.37   11.06
 -13   3  12  294.29    9.82
  13   3 -12  298.95    8.18
  13  -3 -12  311.53    9.49
  13  -3 -11    8.45    0.99
 -13   3  11    8.92    1.76
 -13  -3  11    8.20    1.86
 -13   3  11    8.90    1.68
  13   3 -11    9.66    1.11
  13  -3 -11   10.73    1.65
 -13   3  10  382.47   10.93
 -13  -3  10  384.34    7.96
  13  -3 -10  371.58    9.04
 -13  -3  10  388.56   11.78
  13  -3 -10  367.31   12.04
 -13   3  10  365.98   10.75
  13   3 -10  375.33    8.87
  13  -3 -10  380.89   10.39
 -13  -3  10  361.30    7.69
  13  -3  -9  889.74   19.12
 -13   3   9  911.14   20.75
 -13  -3   9  898.00   18.57
 -13  -3   9  912.01   21.63
  13  -3  -9  898.61   22.13
 -13   3   9  889.70   20.62
  13   3  -9  901.16   18.33
  13  -3  -9  909.27   20.28
  13  -3  -8  517.49   12.28
 -13   3   8  511.25   13.09
 -13  -3   8  541.17   12.19
 -13  -3   8  540.28   14.05
  13  -3  -8  544.63   14.60
  13  -3  -8  523.16   14.42
 -13   3   8  523.69   13.21
  13   3  -8  542.73   11.05
  13  -3  -7  134.57    4.64
 -13  -3   7  132.09    4.63
 -13   3   7  135.38    4.90
  13  -3  -7  130.23    5.63
  13  -3  -7  142.48    5.87
 -13   3   7  147.12    5.09
  13  -3  -6    3.35    0.89
 -13  -3   6    3.99    0.87
 -13  -3   6    3.87    0.78
  13  -3  -6    3.80    1.21
 -13   3   6    5.38    1.03
 -13   3   6    3.69    0.92
 -13   3   6    6.05    1.10
 -13   3   6    6.96    0.99
  13  -3  -6    4.06    1.15
  13  -3  -5   74.14    3.35
 -13  -3   5   80.58    3.63
 -13  -3   5   75.63    2.75
  13  -3  -5   79.77    3.88
 -13   3   5   82.19    3.17
 -13   3   5   80.89    3.32
 -13   3   5   75.50    3.50
  13  -3  -5   76.54    3.71
 -13   3   5   77.36    3.23
  13  -3  -4  220.06    6.72
 -13  -3   4  224.50    7.01
 -13  -3   4  225.27    5.27
  13  -3  -4  230.03    7.03
 -13   3   4  225.01    6.64
 -13   3   4  214.54    5.94
 -13   3   4  217.16    6.22
 -13   3   4  230.47    6.40
  13  -3  -4  244.06    7.05
 -13  -3   3  215.40    5.02
  13  -3  -3  208.09    6.63
  13  -3  -3  207.60    6.30
 -13  -3   3  222.08    4.53
 -13   3   3  220.19    6.07
 -13  -3   3  226.20    7.07
  13  -3  -3  222.31    6.66
 -13  -3   3  212.25    4.47
 -13   3   3  204.65    6.27
 -13   3   3  231.71    6.41
 -13   3   3  201.07    5.63
  13  -3  -2 1370.59   28.74
 -13   3   2 1355.15   27.16
  13  -3  -2 1345.11   27.72
 -13  -3   2 1363.07   29.13
 -13  -3   2 1409.41   26.02
  13  -3  -2 1389.40   28.09
 -13   3   2 1299.76   27.58
 -13   3   2 1404.03   28.11
  13  -3  -1 1080.81   23.68
 -13  -3   1 1054.78   23.93
  13  -3  -1 1058.52   22.58
 -13  -3   1 1088.51   20.60
  13  -3  -1 1085.35   22.22
 -13   3   1 1095.59   22.09
 -13   3   1 1082.24   22.61
 -13   3   1 1072.34   22.85
 -13   3   0  154.51    5.09
  13  -3   0  159.49    5.85
 -13  -3   0  157.09    6.04
 -13   3   0  151.98    4.69
 -13  -3   0  156.42    3.56
  13  -3   0  162.13    4.69
  13  -3   0  170.45    5.13
 -13   3   0  152.03    5.22
  13  -3   1  738.52   15.76
 -13   3  -1  717.41   16.65
  13  -3   1  769.95   17.84
 -13  -3  -1  765.86   18.23
 -13  -3  -1  748.99   14.71
  13   3   1  765.25   14.43
 -13   3  -1  728.36   16.82
 -13   3  -2   73.81    3.49
  13   3   2   78.64    2.12
  13  -3   2   88.46    4.29
  13   3   2   80.18    2.16
 -13   3  -2   77.14    3.54
 -13  -3  -2   80.03    4.26
  13  -3   2   75.02    2.88
 -13  -3  -2   78.07    2.47
  13   3   2   76.95    2.29
  13  -3   2   75.36    3.16
 -13   3  -3  214.59    6.75
 -13   3  -3  215.96    6.79
 -13  -3  -3  204.54    7.60
  13   3   3  208.22    5.10
  13   3   3  199.99    4.78
  13  -3   3  205.37    7.32
  13  -3   3  213.10    5.74
  13  -3   3  206.44    6.12
 -13   3  -4    9.47    1.38
  13  -3   4    9.53    1.65
  13   3   4    8.74    0.83
 -13  -3  -4    8.55    1.69
  13  -3   4   11.43    1.14
 -13   3  -4    8.52    1.37
 -13   3  -5  523.94   13.23
  13  -3   5  509.70   12.54
  13   3   5  521.85   11.55
 -13  -3  -5  555.19   14.92
  13  -3   5  514.52   14.26
 -13   3  -5  505.42   13.44
  13  -3   5  521.14   12.12
 -13   3  -6  714.38   17.36
  13   3   6  728.58   15.98
  13  -3   6  740.21   16.87
  13  -3   6  743.63   18.87
 -13  -3  -6  738.96   19.04
  13  -3   6  726.05   16.33
  13  -3   7  249.53    7.64
 -13   3  -7  253.89    8.03
  13  -3   7  245.08    9.00
  13  -3   7  229.28    7.01
 -13  -3  -7  237.50    9.06
  13   3   7  239.44    7.03
 -13   3  -8   28.82    2.43
 -13  -3  -8   26.22    2.90
  13  -3   8   23.18    2.74
  13   3   8   28.71    2.22
  13  -3   9  271.40    9.98
 -13   3  -9  249.41    8.50
  13   3   9  274.57    8.42
  13  -3  10  541.23   16.03
  13   3  10  538.49   14.24
  13  -3  11   40.86    3.81
  13   3  11   45.20    3.36
  13  -3  12   74.84    5.23
  13   3  12   79.31    4.65
  13  -3  13  120.52    6.82
  13   3  13  110.36    5.94
  13  -3  14   35.08    3.84
  13   3  14   29.33    3.43
  13  -3  14   31.39    3.98
  13   3  14   38.00    3.66
 -13   5  15    1.55    1.55
 -13  -5  15   -0.32    1.81
 -13   5  15    1.40    1.71
  13  -5 -15    4.25    1.98
 -13   5  14  101.38    5.60
 -13  -5  14  103.29    6.79
 -13   5  14   93.76    5.46
  13  -5 -14   98.95    5.44
  13  -5 -13  182.90    5.89
 -13   5  13  196.36    7.70
 -13  -5  13  172.91    8.77
 -13   5  13  184.96    7.57
  13   5 -13  171.91    5.51
  13  -5 -13  181.95    7.38
 -13  -5  12  204.04    5.32
  13  -5 -12  208.94    6.61
  13   5 -12  206.09    5.83
 -13   5  12  213.25    7.91
 -13   5  12  210.27    7.95
  13  -5 -12  222.31    8.05
  13  -5 -11   27.60    2.15
 -13  -5  11   29.14    2.51
 -13  -5  11   27.45    2.08
 -13   5  11   28.57    2.74
 -13   5  11   30.31    2.75
  13   5 -11   27.18    1.53
  13  -5 -11   30.66    2.77
 -13  -5  11   27.60    1.68
  13  -5 -10  373.10   10.17
 -13  -5  10  394.75   10.64
 -13  -5  10  373.95   10.25
 -13   5  10  373.37   11.00
 -13   5  10  399.09   11.23
  13   5 -10  385.64    8.35
 -13  -5  10  389.72    9.36
 -13  -5   9    2.55    0.96
 -13  -5   9    2.54    1.00
  13  -5  -9    1.08    0.76
 -13   5   9    1.05    1.03
 -13   5   9    3.63    1.31
  13   5  -9    1.55    0.29
 -13  -5   9    1.42    0.70
  13  -5  -8  432.79   11.39
 -13  -5   8  465.96   10.91
 -13  -5   8  452.00   11.89
 -13   5   8  426.25   11.49
 -13   5   8  436.72   11.60
 -13  -5   7   62.26    2.91
  13  -5  -7   56.82    3.20
 -13  -5   7   57.61    2.59
 -13   5   7   57.14    3.17
 -13  -5   7   59.21    3.48
  13  -5  -7   60.99    4.12
 -13   5   7   57.38    3.09
 -13   5   7   54.62    3.65
  13  -5  -7   55.52    3.90
  13  -5  -6   14.17    1.68
  13  -5  -6   13.55    1.91
 -13  -5   6   15.06    1.15
 -13  -5   6   14.84    1.35
  13  -5  -6   14.20    2.02
 -13   5   6   17.64    1.77
 -13   5   6   14.73    1.60
 -13   5   6   16.58    2.01
  13  -5  -5   72.77    3.73
 -13  -5   5   71.63    2.32
  13  -5  -5   77.69    4.22
  13  -5  -5   71.92    4.13
 -13  -5   5   70.78    2.84
 -13   5   5   70.59    3.91
 -13   5   5   70.51    3.38
 -13   5   5   75.98    3.33
 -13   5   4  125.90    4.54
  13  -5  -4  126.62    5.42
 -13   5   4  135.93    5.38
  13  -5  -4  125.81    5.16
 -13   5   4  135.98    4.89
 -13  -5   4  135.89    3.25
 -13  -5   4  136.14    4.05
  13  -5  -3    6.05    1.32
 -13  -5   3    5.27    0.74
 -13  -5   3    4.37    1.22
  13  -5  -3    6.13    1.22
 -13  -5   3    5.01    0.34
  13  -5  -3    6.90    1.49
 -13   5   3    5.80    1.19
 -13   5   3    4.21    1.00
 -13   5   3    5.69    1.02
  13  -5  -2  503.63   13.11
 -13  -5   2  488.30   13.71
  13  -5  -2  488.97   12.48
 -13   5   2  507.30   11.95
  13  -5  -2  514.44   12.78
 -13   5   2  515.40   12.74
 -13   5   2  493.39   12.71
 -13   5   2  474.19   12.14
 -13  -5   2  495.88   10.77
  13  -5  -1  382.50   10.97
 -13   5   1  386.79    9.99
 -13  -5   1  387.53   11.68
  13  -5  -1  392.65   10.22
 -13  -5   1  380.20    8.79
  13  -5  -1  396.12   10.42
 -13  -5   1  398.82    8.09
 -13   5   1  390.88   10.62
 -13   5   1  390.38   10.35
 -13   5   0   57.91    3.17
  13  -5   0   55.17    3.46
 -13  -5   0   52.47    2.19
 -13  -5   0   55.09    3.81
 -13   5   0   52.21    2.87
  13  -5   0   55.15    2.81
  13  -5   0   55.62    2.98
 -13  -5   0   54.92    2.03
 -13   5   0   56.18    3.16
 -13  -5  -1  137.23    4.28
  13  -5   1  143.76    5.98
 -13   5  -1  149.92    5.61
 -13  -5  -1  139.91    6.35
 -13  -5  -1  141.03    4.20
  13   5   1  136.96    4.03
  13  -5   1  138.69    5.04
 -13   5  -1  141.75    5.21
 -13   5  -1  143.77    5.46
  13  -5   1  149.00    4.96
  13  -5   2  188.10    7.27
  13  -5   2  199.50    5.97
 -13   5  -2  189.01    6.88
  13   5   2  197.76    4.18
 -13  -5  -2  190.93    7.78
 -13  -5  -2  192.32    5.59
  13   5   2  187.47    5.07
 -13   5  -2  182.81    6.56
  13  -5   3   30.03    2.83
 -13   5  -3   28.29    2.53
  13   5   3   30.03    1.57
  13  -5   3   29.42    2.02
 -13  -5  -3   25.88    2.79
 -13  -5  -3   27.73    1.95
  13   5   3   27.75    1.20
  13  -5   3   28.83    2.13
 -13   5  -3   28.34    2.38
  13  -5   4  544.18   15.30
 -13   5  -4  572.24   15.11
 -13  -5  -4  563.01   16.19
 -13  -5  -4  565.90   13.41
  13  -5   4  550.74   13.21
  13   5   4  575.75   11.95
 -13   5  -4  540.65   14.23
  13  -5   4  536.60   13.50
  13   5   4  570.50   12.19
  13  -5   5  213.79    8.45
  13   5   5  220.42    5.87
 -13   5  -5  223.08    8.21
 -13  -5  -5  207.70    8.78
 -13  -5  -5  224.15    7.03
  13   5   5  222.03    5.95
  13  -5   5  218.07    6.67
 -13   5  -5  224.66    7.58
  13  -5   5  221.41    7.14
  13  -5   6  325.78   11.34
  13  -5   6  323.44    9.30
 -13   5  -6  358.09   11.48
 -13  -5  -6  350.86   10.03
  13   5   6  371.62    9.08
  13   5   6  357.47    8.69
 -13   5  -6  343.09   10.31
  13  -5   7  154.26    7.19
 -13  -5  -7  152.53    6.13
  13   5   7  151.99    4.96
  13   5   7  148.17    5.25
  13  -5   8   17.67    2.64
  13   5   8   15.11    1.60
  13   5   8   18.80    1.85
  13  -5   9    2.81    1.54
  13   5   9    4.81    1.31
  13   5   9    4.63    1.17
  13  -5  10  374.72   13.38
  13   5  10  391.12   10.89
  13   5  10  412.33   11.66
  13  -5  11  123.86    7.07
  13   5  11  122.20    5.35
  13   5  11  122.60    5.81
  13  -5  12    7.08    2.18
  13   5  12    4.25    1.39
  13   5  12    4.02    1.59
  13  -5  13    9.99    2.55
  13   5  13    8.93    1.94
  13   5  13    9.42    2.09
 -13   7  13    9.92    1.99
 -13   7  13   13.21    2.29
 -13   7  12  200.40    7.94
 -13   7  12  209.69    8.12
  13  -7 -12  208.97    7.46
 -13   7  11   61.65    4.01
 -13   7  11   54.95    3.82
 -13  -7  11   59.43    3.21
  13  -7 -11   60.36    3.69
  13  -7 -10    4.60    1.33
 -13   7  10    5.10    1.49
 -13  -7  10    5.66    1.23
 -13   7  10    4.27    1.51
  13  -7  -9   14.42    2.08
 -13   7   9   14.95    1.96
 -13  -7   9   14.56    1.54
 -13  -7   9   14.91    1.72
 -13   7   8  725.76   16.94
 -13  -7   8  666.29   14.96
 -13  -7   8  628.71   15.73
  13  -7  -8  688.60   17.06
 -13  -7   7  318.43    9.05
 -13   7   7  356.62   10.10
  13  -7  -7  346.10   10.55
 -13  -7   7  330.16    8.24
 -13   7   7  361.63   10.00
 -13   7   6 1134.10   24.00
 -13  -7   6 1091.19   23.02
 -13   7   6 1052.23   24.02
 -13  -7   6 1050.29   21.71
  13  -7  -6 1087.35   24.82
  13  -7  -5    8.28    1.67
 -13  -7   5   10.48    1.27
 -13  -7   5    8.94    0.87
 -13   7   5    9.14    1.53
 -13   7   5    9.41    1.63
 -13  -7   4  213.73    6.21
 -13   7   4  216.12    7.07
 -13  -7   4  216.97    5.22
 -13   7   4  230.08    7.43
  13  -7  -4  218.84    7.94
  13  -7  -3   20.40    2.40
 -13  -7   3   22.33    1.15
 -13   7   3   21.18    2.07
 -13   7   3   23.16    2.15
 -13  -7   3   20.78    1.62
  13  -7  -2  152.84    6.52
 -13   7   2  158.26    5.84
 -13  -7   2  158.33    3.84
 -13  -7   2  152.86    4.93
 -13   7   2  149.00    5.93
  13  -7  -1   28.74    2.78
 -13   7   1   26.46    2.45
 -13   7   1   24.36    2.24
 -13  -7   1   29.04    1.92
  13  -7   0  543.44   15.11
 -13   7   0  560.46   14.25
 -13   7   0  546.53   14.37
 -13  -7   0  523.93   12.75
 -13   7  -1  189.08    7.00
 -13   7  -1  197.14    7.23
 -13  -7  -1  172.27    5.87
  13   7   1  184.14    4.29
  13   7   1  181.84    5.75
 -13  -7  -1  196.26    5.25
  13   7   2 2146.66   39.79
  13  -7   2 2064.15   44.70
 -13   7  -2 2019.43   44.04
  13   7   2 2084.30   41.46
 -13  -7  -2 2049.51   42.27
 -13  -7  -2 2123.83   41.16
 -13  -7  -3    2.33    1.02
  13   7   3    1.52    0.87
  13  -7   3    0.48    1.39
  13   7   3    0.56    0.49
 -13   7  -3    3.02    1.62
 -13  -7  -3    0.88    0.77
  13  -7   4   74.03    4.89
 -13   7  -4   84.93    5.15
  13   7   4   90.01    3.55
 -13  -7  -4   83.78    4.30
 -13  -7  -4   82.68    3.76
  13   7   4   80.85    2.75
  13  -7   5  133.26    6.74
  13   7   5  134.11    4.58
 -13   7  -5  117.20    6.37
 -13  -7  -5  116.65    5.49
 -13  -7  -5  134.51    5.21
  13   7   5  125.76    3.88
  13  -7   6  530.53   15.89
  13   7   6  507.68   12.13
 -13   7  -6  487.17   15.59
 -13  -7  -6  483.87   13.94
  13   7   6  500.01   11.48
 -13  -7  -6  547.15   13.71
  13  -7   7   69.96    5.06
 -13  -7  -7   74.26    4.59
  13   7   7   73.45    3.16
 -13  -7  -7   71.26    4.09
  13   7   7   77.86    3.45
  13  -7   8   46.15    4.24
  13   7   8   50.06    2.81
 -13  -7  -8   53.72    3.69
  13   7   9    2.80    1.09
  13  -7   9   -0.37    1.60
  13   7   9    0.73    1.06
 -13  -7  -9    0.40    1.29
  13  -7  10  688.82   21.37
  13   7  10  732.64   17.65
  13   7  10  748.71   17.62
 -13  -7 -10  760.61   19.70
  13  -7  11    1.63    1.81
  13   7  11    2.30    1.29
 -13  -7 -11   -1.16    1.68
  13   7  11    0.63    1.02
 -13   9  10  280.88    9.54
 -13   9  10  277.78    9.61
 -13  -9  10  249.67    8.71
  13  -9 -10  252.80    9.52
  13  -9  -9   23.96    2.72
 -13   9   9   24.58    2.72
 -13   9   9   29.98    2.93
 -13  -9   9   23.32    2.48
 -13   9   8   63.40    4.06
 -13  -9   8   53.28    3.71
  13  -9  -8   59.20    4.22
 -13   9   7    2.14    1.50
  13  -9  -7    0.47    1.26
 -13  -9   7    1.11    1.20
 -13   9   7    1.27    1.49
 -13   9   6  192.63    7.42
 -13   9   6  213.86    7.74
  13  -9  -6  197.56    8.21
 -13   9   5   99.32    5.00
 -13   9   5   99.19    5.06
  13  -9  -5   97.95    5.56
 -13   9   4   96.50    4.99
 -13   9   4  102.63    5.22
  13  -9  -4   94.40    5.51
 -13   9   3  136.12    6.03
 -13   9   3  133.27    5.92
 -13  -9   3  115.55    4.84
  13  -9  -3  132.65    6.57
  13  -9  -2  523.61   15.36
 -13   9   2  546.63   14.61
 -13   9   2  520.76   14.31
 -13  -9   2  485.13   12.88
  13  -9  -1  131.14    6.58
 -13   9   1  122.00    5.85
 -13  -9   1  112.27    4.91
 -13   9   1  134.25    6.09
  13  -9   0    0.68    1.26
 -13   9   0    0.63    1.43
 -13   9   0    0.86    1.37
 -13  -9   0    0.88    0.89
  13  -9   1  162.91    7.73
 -13   9  -1  175.95    7.51
 -13  -9  -1  145.37    6.15
  13   9   1  155.88    4.53
  13   9   1  174.67    6.23
 -13   9  -1  179.00    7.37
  13  -9   2 1183.88   28.17
  13   9   2 1088.63   22.68
 -13   9  -2 1152.27   27.49
  13   9   2 1154.00   25.02
  13  -9   3  155.47    7.67
  13   9   3  145.20    4.49
 -13   9  -3  141.04    7.19
  13   9   3  158.94    5.84
  13  -9   4   24.08    3.23
  13   9   4   24.03    2.22
 -13   9  -4   19.83    3.07
 -13  -9  -4   24.92    2.22
  13  -9   5  397.04   13.87
 -13   9  -5  402.00   14.05
 -13  -9  -5  399.53   10.98
  13   9   5  378.67   10.69
  13  -9   6  261.42   11.26
 -13   9  -6  274.28   11.67
  13   9   6  284.69    8.59
 -13  -9  -6  289.89    9.04
  13   9   7  206.42    7.11
  13  -9   7  223.03   10.29
 -13  -9  -7  224.60    7.96
  13  -9   8  200.19    9.93
  13   9   8  204.07    6.97
 -13  -9  -8  195.53    7.71
 -14   0  17    1.14    1.67
 -14   0  17    0.80    1.47
  14   0 -17    0.05    1.21
 -14   0  16  688.50   20.38
 -14   0  16  692.13   19.90
  14   0 -16  700.11   17.93
 -14   0  15    2.35    1.60
 -14   0  15   -1.10    1.33
  14   0 -15   -0.41    1.05
 -14   0  14   84.71    5.15
 -14   0  14   95.61    5.68
  14   0 -14   81.54    4.26
  14   0 -13    1.43    1.01
 -14   0  13    0.34    1.13
 -14   0  13    2.17    1.31
 -14   0  12 1433.81   32.91
 -14   0  12 1516.82   33.78
  14   0 -12 1527.59   31.52
 -14   0  11    1.78    1.28
  14   0 -11    1.43    0.88
 -14   0  11    1.23    1.36
 -14   0  10  249.26    7.94
 -14   0  10  246.29    8.29
  14   0 -10  227.80    6.84
 -14   0   9   -0.25    0.93
 -14   0   9   -1.81    1.06
  14   0  -9    0.71    0.70
  14   0  -8 2152.80   41.59
 -14   0   8 2014.62   42.56
 -14   0   8 2156.62   43.10
 -14   0   8 2141.01   40.25
 -14   0   7    0.61    0.39
 -14   0   7    0.71    0.77
  14   0  -7    0.15    0.46
 -14   0   7   -1.16    0.84
 -14   0   6   49.11    2.13
  14   0  -6   50.01    2.41
 -14   0   6   48.14    2.53
 -14   0   5    0.74    0.52
 -14   0   5    0.33    0.60
  14   0  -5    0.34    0.59
  14   0  -5    0.55    0.61
 -14   0   5    1.43    0.68
 -14   0   5    0.19    0.52
 -14   0   4 4551.14   84.92
 -14   0   4 4537.46   84.00
  14   0  -4 4293.22   85.26
  14   0  -4 4342.38   84.54
  14   0  -4 4440.89   84.77
 -14   0   4 4488.01   84.03
 -14   0   4 4397.44   84.04
 -14   0   3   -0.14    0.68
  14   0  -3    0.62    0.76
  14   0  -3   -0.16    0.45
  14   0  -3    0.13    0.41
 -14   0   3    0.72    0.36
 -14   0   3    0.07    0.43
 -14   0   2  530.26   12.78
  14   0  -2  514.06   13.06
  14   0  -2  551.81   11.28
  14   0  -2  545.57   11.69
 -14   0   2  549.11   10.78
 -14   0   2  523.45   11.36
 -14   0   1    0.07    0.41
 -14   0   1    0.94    0.73
 -14   0   1    0.52    0.23
  14   0  -1    0.24    0.80
  14   0  -1    0.53    0.41
  14   0  -1    0.36    0.30
 -14   0   0 3139.77   61.31
  14   0   0 2981.75   59.22
  14   0   0 3010.35   61.71
 -14   0  -1    0.42    0.85
  14   0   1    0.50    0.25
  14   0   1    0.58    0.95
 -14   0  -1   -0.31    0.43
  14   0   1   -0.04    0.40
 -14   0  -2 1915.16   37.38
  14   0   2 1897.81   34.03
  14   0   2 1836.28   34.93
  14   0   3    0.24    0.46
 -14   0  -3    0.35    0.79
  14   0   3    0.48    1.00
  14   0   3    0.56    0.32
  14   0   4 1071.05   21.86
 -14   0  -4 1060.19   23.82
  14   0   4 1003.32   24.10
 -14   0  -5    0.62    0.87
  14   0   5    0.64    0.70
  14   0   5    0.01    0.99
 -14   0  -6 3023.78   60.21
  14   0   6 2992.20   58.15
  14   0   6 2934.94   60.70
  14   0   6 2924.64   58.51
 -14   0  -7   -1.08    1.23
  14   0   7    0.31    0.68
  14   0   7    0.39    1.11
  14   0   7    1.75    0.97
 -14   0  -8  214.21    7.96
  14   0   8  206.85    6.96
  14   0   8  216.30    8.50
  14   0   8  212.82    7.45
 -14   0  -9   -1.43    1.19
  14   0   9    0.52    0.81
  14   0   9    1.84    1.52
  14   0   9    0.04    0.99
  14   0  10 1341.12   30.80
  14   0  10 1242.13   29.29
  14   0  11    0.01    1.29
  14   0  11    0.65    1.30
  14   0  12    3.66    1.89
  14   0  12    2.71    1.48
  14   0  13    0.70    1.43
  14   0  14  224.58    9.88
 -14  -2  16  180.43    8.66
 -14   2  16  175.25    8.24
 -14  -2  16  173.64    9.05
  14   2 -16  162.40    6.50
  14  -2 -16  161.50    7.11
 -14   2  16  174.52    8.32
 -14  -2  15  106.48    6.16
 -14   2  15   96.34    5.73
 -14  -2  15   99.23    6.45
  14   2 -15   95.24    4.57
  14  -2 -15   94.23    5.08
 -14   2  15  102.85    6.08
 -14  -2  14   33.35    3.32
 -14   2  14   39.71    3.54
 -14  -2  14   38.70    3.83
  14   2 -14   32.29    2.44
  14  -2 -14   38.27    3.00
 -14   2  14   41.25    3.83
 -14  -2  13   47.86    3.75
 -14   2  13   46.57    3.64
 -14  -2  13   50.66    4.19
  14   2 -13   47.22    2.84
  14  -2 -13   55.13    3.52
 -14   2  13   44.83    3.66
 -14   2  12 1472.63   33.54
 -14  -2  12 1529.48   33.64
 -14  -2  12 1514.49   34.58
 -14   2  12 1476.70   33.25
  14   2 -12 1550.59   31.25
  14  -2 -12 1502.30   32.25
 -14   2  11   29.10    2.74
  14  -2 -11   28.83    1.26
 -14  -2  11   29.66    2.67
 -14  -2  11   29.44    2.90
 -14   2  11   29.74    2.66
  14   2 -11   31.10    2.00
  14  -2 -11   34.09    2.57
 -14   2  10   45.55    3.17
  14  -2 -10   54.48    2.21
  14  -2 -10   57.55    4.07
 -14  -2  10   53.66    3.31
 -14  -2  10   51.10    3.63
 -14   2  10   44.35    3.06
  14   2 -10   55.61    2.52
  14  -2 -10   53.99    3.04
 -14  -2   9   78.64    2.28
 -14   2   9   70.85    3.77
  14  -2  -9   75.88    2.93
 -14  -2   9   72.61    3.75
  14  -2  -9   69.44    4.28
 -14  -2   9   76.12    4.13
  14   2  -9   74.07    2.77
  14  -2  -9   78.75    3.61
 -14   2   8  834.51   19.12
  14  -2  -8  830.07   18.01
 -14  -2   8  860.18   17.44
 -14  -2   8  839.25   18.85
  14  -2  -8  820.74   20.25
 -14  -2   8  821.87   19.50
 -14   2   8  831.48   19.04
  14   2  -8  873.05   17.26
  14  -2  -7   19.07    1.54
 -14   2   7   18.21    1.70
 -14  -2   7   18.00    1.44
  14  -2  -7   19.66    2.02
 -14  -2   7   20.00    1.67
 -14  -2   7   19.05    1.81
  14  -2  -7   17.36    1.93
 -14   2   7   20.36    1.77
 -14   2   7   18.73    1.37
  14  -2  -6  328.87    8.69
 -14  -2   6  345.06    8.63
 -14   2   6  319.38    8.48
  14  -2  -6  321.76    9.47
 -14  -2   6  344.16    8.90
 -14  -2   6  329.14    8.23
  14  -2  -6  338.45    9.54
 -14   2   6  329.59    8.62
 -14   2   6  344.02    8.99
 -14   2   6  334.99    8.14
  14  -2  -5  415.06   10.52
 -14  -2   5  434.42   10.59
 -14   2   5  410.50    9.86
 -14  -2   5  421.40   10.05
  14  -2  -5  425.05   10.99
 -14  -2   5  432.83    9.55
 -14   2   5  406.29   10.36
  14  -2  -5  433.29   10.96
 -14   2   5  417.52   10.09
 -14   2   5  433.33   10.02
  14  -2  -4  447.60   11.56
 -14  -2   4  471.09   11.69
 -14  -2   4  475.71   10.55
  14  -2  -4  477.63   11.71
 -14   2   4  472.14   10.56
 -14  -2   4  489.24   10.02
 -14   2   4  468.35   10.88
 -14   2   4  464.99   11.16
  14  -2  -4  473.53   11.49
 -14   2   4  479.34   11.04
 -14   2   3    1.82    0.67
  14  -2  -3    1.67    0.82
  14  -2  -3    2.00    0.69
 -14  -2   3    0.94    0.81
  14  -2  -3    3.24    0.88
 -14  -2   3    1.62    0.33
 -14  -2   3    1.33    0.30
 -14   2   3    0.65    0.54
 -14   2   2  721.08   15.47
  14  -2  -2  688.97   14.75
  14  -2  -2  687.65   16.10
 -14   2   2  673.79   14.19
 -14  -2   2  686.81   16.17
  14  -2  -2  683.08   15.14
 -14  -2   2  719.13   13.26
 -14  -2   2  691.55   13.05
 -14   2   2  651.24   14.76
 -14  -2   2  691.30   13.22
 -14   2   1  393.68    9.91
  14  -2  -1  376.65   10.51
 -14  -2   1  389.79   10.64
  14  -2  -1  395.55    8.99
  14   2  -1  393.75    7.80
  14  -2  -1  395.27    9.43
 -14   2   1  381.13    8.79
 -14   2   1  393.17    9.44
 -14   2   0  645.56   14.71
 -14   2   0  657.66   14.06
  14  -2   0  634.80   15.98
 -14  -2   0  691.27   16.36
  14   2   0  638.93   16.11
 -14   2   0  712.51   15.60
  14   2   0  673.52   12.87
  14  -2   0  692.32   14.06
  14  -2   0  651.40   14.58
 -14   2  -1  156.63    5.37
 -14   2  -1  147.88    4.90
  14  -2   1  146.81    5.83
 -14  -2  -1  147.42    5.85
  14   2   1  147.70    5.89
  14  -2   1  154.71    4.70
  14   2   1  146.43    3.51
  14   2   2   44.98    1.65
  14  -2   2   44.66    3.09
 -14   2  -2   45.40    2.76
 -14   2  -2   40.86    2.41
 -14  -2  -2   42.62    2.97
  14   2   2   41.47    3.01
  14  -2   2   41.70    1.87
  14   2   2   43.85    1.15
  14  -2   2   45.59    2.24
 -14   2  -3 1044.46   22.56
  14  -2   3 1038.83   20.64
  14   2   3  999.05   19.73
  14   2   3 1022.51   20.26
  14  -2   3  959.81   23.20
 -14  -2  -3 1029.05   23.53
 -14   2  -3 1009.40   21.94
  14   2   3  997.83   23.43
  14  -2   3  999.60   21.21
  14  -2   4 1175.87   24.98
 -14   2  -4 1254.68   26.33
  14  -2   4 1213.54   27.39
 -14  -2  -4 1203.87   27.30
  14   2   4 1200.54   24.26
 -14   2  -4 1186.77   25.84
  14   2   4 1184.09   27.27
  14  -2   4 1209.08   24.41
  14   2   4 1211.23   23.93
  14   2   5    6.30    0.92
 -14   2  -5    7.18    1.35
  14  -2   5    5.93    1.04
  14  -2   5    5.76    1.33
 -14  -2  -5    7.14    1.60
  14   2   5    7.26    0.96
  14  -2   5    6.10    0.89
  14   2   5    5.06    1.31
 -14   2  -6  213.87    7.44
  14  -2   6  227.23    6.90
 -14  -2  -6  213.76    8.26
  14  -2   6  225.22    8.42
  14   2   6  227.77    6.60
  14   2   6  229.62    6.52
  14  -2   6  220.49    6.30
 -14   2  -7  403.86   11.39
  14  -2   7  414.78   10.77
 -14  -2  -7  395.01   12.33
  14  -2   7  401.75   12.47
  14   2   7  404.59   10.44
  14   2   7  382.31   10.30
 -14   2  -8  163.49    6.38
  14  -2   8  162.53    6.06
 -14  -2  -8  159.17    7.17
  14  -2   8  156.08    7.19
  14   2   8  163.99    5.98
  14   2   8  166.83    5.99
 -14   2  -9    3.11    1.24
  14  -2   9    1.78    1.33
  14   2   9    3.27    1.08
  14   2   9    3.32    1.19
  14  -2  10  714.72   19.79
  14   2  10  694.82   17.79
  14   2  10  754.94   18.26
  14  -2  11  263.50   10.34
  14   2  11  252.18    8.99
  14  -2  12  224.94    9.66
  14  -2  12  239.79    9.96
  14   2  12  229.45    8.83
  14  -2  13  278.45   11.09
  14  -2  13  270.49   11.26
  14   2  13  278.13   10.27
  14   2  14   94.76    5.82
  14  -2  14   97.79    6.35
  14  -2  14   90.03    6.40
 -14   4  15   20.03    2.69
 -14  -4  15   22.36    3.05
 -14  -4  15   29.57    3.77
 -14   4  15   28.65    3.19
  14  -4 -15   28.53    3.07
 -14   4  14    1.85    1.38
 -14  -4  14    4.97    2.22
 -14   4  14    4.29    1.45
  14   4 -14    4.54    1.07
  14  -4 -14    8.23    1.81
  14  -4 -13    1.85    0.67
 -14   4  13    3.17    1.46
 -14  -4  13    2.02    1.81
 -14   4  13    1.50    1.32
  14   4 -13    2.39    0.77
  14  -4 -13    2.79    1.41
  14  -4 -12   13.02    1.37
 -14   4  12   12.71    2.05
 -14  -4  12   13.21    2.49
 -14   4  12   15.16    2.15
  14   4 -12   11.32    1.21
  14  -4 -12   13.01    1.94
  14  -4 -11  316.87    8.68
 -14  -4  11  324.53    7.67
 -14   4  11  349.57   10.44
 -14  -4  11  345.10   11.61
 -14   4  11  350.58   10.45
  14   4 -11  337.05    7.96
  14  -4 -11  329.79   10.05
  14  -4 -10    9.17    1.28
 -14  -4  10    6.44    1.02
  14   4 -10    5.50    0.69
 -14   4  10    6.74    1.45
 -14   4  10    4.85    1.44
 -14  -4  10    5.96    0.83
  14  -4  -9  325.35    8.96
 -14  -4   9  316.37    8.84
 -14   4   9  337.03    9.73
  14  -4  -9  321.05   11.11
 -14   4   9  326.02    9.65
  14   4  -9  341.20    7.03
  14  -4  -8  492.45   12.28
 -14  -4   8  508.06   12.48
 -14   4   8  495.33   12.55
  14  -4  -8  487.40   14.17
  14  -4  -8  491.26   14.27
 -14   4   8  500.03   12.65
  14  -4  -7    4.30    1.07
 -14  -4   7    1.96    0.79
  14  -4  -7    4.17    1.39
 -14   4   7    3.34    1.01
 -14   4   7    5.17    1.17
  14  -4  -7    2.38    1.20
 -14   4   7    2.56    0.91
  14  -4  -6   36.67    2.50
 -14  -4   6   38.35    1.90
 -14  -4   6   32.58    2.50
  14  -4  -6   36.93    2.88
 -14   4   6   37.59    2.27
 -14   4   6   36.39    2.36
 -14   4   6   36.23    2.62
  14  -4  -6   32.81    2.80
  14  -4  -5  349.98    9.70
 -14  -4   5  350.04    8.26
 -14  -4   5  356.96    7.81
 -14  -4   5  356.25   10.11
 -14  -4   5  353.05    8.06
  14  -4  -5  347.83   10.37
  14  -4  -5  356.77   10.23
 -14   4   5  369.20    9.31
 -14   4   5  338.86    9.78
 -14   4   5  341.84    8.86
 -14   4   5  342.93    9.39
  14  -4  -4  216.90    7.06
  14  -4  -4  217.86    7.12
 -14  -4   4  222.09    4.75
 -14  -4   4  226.16    7.52
 -14  -4   4  222.03    4.94
  14  -4  -4  213.54    7.29
 -14  -4   4  219.61    5.48
 -14   4   4  207.70    6.82
 -14   4   4  219.06    6.47
 -14   4   4  211.39    6.68
 -14   4   4  211.52    6.11
  14  -4  -3    5.60    1.31
 -14  -4   3    4.51    1.23
  14  -4  -3    7.50    1.20
 -14  -4   3    4.18    0.58
 -14   4   3    4.32    0.87
 -14   4   3    6.71    1.17
 -14   4   3    4.10    1.00
  14  -4  -2  188.77    6.73
 -14  -4   2  203.65    7.30
  14  -4  -2  207.61    6.33
 -14   4   2  194.62    5.75
  14  -4  -2  205.22    6.48
 -14   4   2  198.94    6.32
 -14   4   2  205.74    6.18
 -14  -4   2  193.27    4.68
 -14   4   1  278.24    7.47
  14  -4  -1  265.01    8.58
 -14  -4   1  271.75    9.03
 -14  -4   1  276.12    6.16
  14  -4  -1  276.81    7.63
  14  -4  -1  277.61    7.92
 -14   4   1  278.77    8.07
 -14   4   1  296.32    8.03
 -14  -4   0  767.78   15.86
 -14   4   0  789.15   18.02
  14  -4   0  802.64   19.06
 -14  -4   0  808.56   19.64
  14  -4   0  804.68   17.35
  14  -4   0  811.11   17.73
 -14   4   0  783.39   17.46
 -14   4   0  846.88   18.37
 -14   4  -1    6.77    1.30
  14  -4   1    5.19    1.32
  14   4   1    7.01    0.61
 -14   4  -1    6.91    1.20
  14  -4   1    5.32    0.87
 -14  -4  -1    6.33    1.60
 -14   4  -1    4.99    0.80
  14  -4   1    8.84    1.18
 -14  -4  -1    5.81    0.69
  14  -4   2  241.53    8.52
  14   4   2  258.37    5.20
 -14   4  -2  253.72    7.91
  14  -4   2  251.59    6.79
 -14  -4  -2  256.72    8.99
 -14  -4  -2  250.18    6.25
  14   4   2  251.69    5.10
  14   4   2  253.77    5.74
  14  -4   2  260.34    7.27
  14   4   3  782.87   15.53
  14  -4   3  816.44   19.48
 -14   4  -3  772.56   18.35
  14   4   3  811.48   15.49
  14  -4   3  758.38   16.74
 -14  -4  -3  812.52   16.46
  14   4   3  712.09   15.34
  14  -4   3  805.55   17.33
 -14   4  -3  768.94   18.00
  14  -4   4   21.33    2.40
 -14   4  -4   23.20    2.29
 -14  -4  -4   21.99    2.61
 -14  -4  -4   21.06    1.63
  14   4   4   24.04    1.46
  14   4   4   22.68    1.26
  14  -4   4   22.41    1.68
  14  -4   4   24.07    1.95
 -14   4  -4   24.40    2.16
  14  -4   5   68.59    3.46
  14  -4   5   68.23    4.33
  14  -4   5   66.74    3.10
 -14  -4  -5   70.77    4.59
 -14   4  -5   57.87    3.84
  14   4   5   67.92    2.90
  14   4   5   65.97    2.56
 -14   4  -5   63.52    3.60
  14  -4   6   19.89    1.92
  14  -4   6   17.08    2.38
 -14  -4  -6   21.93    2.73
  14   4   6   19.54    1.47
  14   4   6   19.20    1.71
  14  -4   6   19.79    1.75
 -14   4  -6   19.91    2.11
  14  -4   7 2234.60   48.24
  14   4   7 2247.60   44.32
  14   4   7 2306.66   45.24
  14  -4   7 2227.21   45.10
 -14   4  -7 2163.19   46.07
  14  -4   8  290.34   10.70
  14   4   8  281.13    8.11
  14   4   8  297.42    8.89
  14   4   9  126.82    5.03
  14  -4   9  126.63    6.87
  14   4   9  127.78    5.53
  14   4  10  175.43    6.44
  14  -4  10  176.25    8.31
  14   4  10  179.43    7.10
  14   4  11  303.14    9.66
  14  -4  11  316.46   11.99
  14   4  11  319.50   10.47
  14   4  12   80.58    4.56
  14  -4  12   87.09    5.96
  14   4  12   76.44    4.86
  14   4  13   17.01    2.33
  14  -4  13   19.34    3.02
  14   4  13   13.65    2.30
 -14   6  14    7.11    2.21
 -14  -6  14   -0.29    1.72
 -14   6  14    3.79    1.73
  14  -6 -14    3.97    1.86
  14  -6 -13  262.74    8.40
 -14   6  13  285.50    9.82
 -14   6  13  290.00    9.92
  14  -6 -12   11.61    1.61
 -14   6  12   10.89    1.90
 -14   6  12   10.89    1.97
  14  -6 -11  293.79    9.02
 -14  -6  11  301.01    9.04
 -14   6  11  306.08    9.74
 -14   6  11  307.88    9.85
 -14  -6  11  289.68    7.96
  14  -6 -10  129.17    5.40
 -14  -6  10  135.90    5.10
 -14  -6  10  125.11    5.54
 -14   6  10  135.17    5.70
 -14   6  10  127.06    5.63
 -14  -6  10  128.70    4.74
  14  -6  -9  112.22    5.03
 -14  -6   9  110.30    4.72
 -14  -6   9  118.30    4.40
 -14   6   9  115.00    5.16
 -14  -6   9  112.78    5.29
 -14   6   9  114.40    5.05
  14  -6  -8   56.52    3.41
 -14  -6   8   57.75    2.69
 -14  -6   8   56.15    3.06
 -14  -6   8   58.52    3.80
 -14   6   8   55.00    3.29
  14  -6  -7   68.20    3.81
 -14  -6   7   62.07    2.59
 -14   6   7   65.10    3.56
 -14  -6   7   64.38    3.10
  14  -6  -6  312.61    9.76
 -14  -6   6  325.40    7.50
 -14  -6   6  325.67    8.44
 -14   6   6  335.58    9.46
 -14   6   6  326.79    9.13
  14  -6  -5  870.35   19.96
 -14   6   5  794.38   18.50
  14  -6  -5  789.09   20.50
 -14  -6   5  858.58   17.71
 -14   6   5  795.68   18.87
 -14  -6   5  824.25   16.45
  14  -6  -4  246.57    8.38
  14  -6  -4  244.72    8.61
 -14   6   4  260.12    7.60
 -14  -6   4  240.93    6.54
 -14  -6   4  252.66    5.43
 -14   6   4  252.24    8.41
 -14   6   4  261.89    7.83
 -14  -6   3   19.63    1.41
  14  -6  -3   20.88    2.21
 -14   6   3   19.90    1.90
  14  -6  -3   19.52    2.14
  14  -6  -3   15.35    2.07
 -14   6   3   17.73    2.05
 -14   6   3   16.88    1.88
 -14   6   2   10.87    1.62
 -14  -6   2    9.62    0.99
 -14  -6   2    9.11    1.83
  14  -6  -2   13.13    1.74
  14  -6  -2   12.51    1.79
  14  -6  -2   12.41    2.00
 -14   6   2   11.80    1.75
 -14   6   2   11.45    1.55
 -14   6   2    7.71    1.49
 -14   6   1  491.74   12.59
  14  -6  -1  469.09   13.23
 -14   6   1  460.16   11.96
 -14  -6   1  458.00   14.00
 -14  -6   1  462.53   10.68
  14  -6  -1  465.20   12.22
 -14   6   1  460.43   12.70
  14  -6   0   73.37    4.35
 -14  -6   0   70.59    2.92
 -14  -6   0   72.63    4.65
 -14   6   0   69.49    3.85
  14  -6   0   66.40    3.49
  14  -6   0   76.25    3.76
 -14  -6   0   74.63    2.50
 -14   6   0   69.36    3.93
 -14   6   0   76.09    3.81
 -14  -6  -1   40.81    2.25
  14  -6   1   49.69    3.63
 -14   6  -1   39.19    2.79
 -14   6  -1   53.61    3.37
 -14  -6  -1   46.83    3.87
  14   6   1   42.05    2.13
 -14  -6  -1   46.69    2.10
  14  -6   1   40.30    2.70
  14  -6   1   46.01    2.75
 -14   6  -1   44.58    3.13
  14  -6   2  240.70    7.43
  14   6   2  255.04    5.28
  14  -6   2  263.11    9.33
 -14   6  -2  247.07    8.64
  14   6   2  270.36    6.76
 -14  -6  -2  267.58    7.05
 -14  -6  -2  247.72    7.20
  14  -6   3 1164.01   27.31
  14  -6   3 1110.48   24.54
 -14   6  -3 1183.89   26.89
 -14  -6  -3 1173.13   24.67
  14   6   3 1192.70   23.54
 -14  -6  -3 1183.05   24.36
  14   6   3 1116.34   22.20
  14  -6   4   52.24    4.04
 -14   6  -4   42.44    3.57
  14   6   4   52.99    2.43
  14  -6   4   46.63    2.80
 -14  -6  -4   50.97    3.01
  14   6   4   51.78    1.91
  14   6   5  120.97    3.99
  14  -6   5  109.26    6.14
 -14   6  -5  120.73    6.18
 -14  -6  -5  112.80    4.90
  14   6   5  114.52    3.58
  14  -6   6  199.77    8.67
 -14   6  -6  202.59    8.55
 -14  -6  -6  200.34    7.18
  14   6   6  202.55    5.75
  14   6   6  202.06    5.88
  14  -6   7 1081.44   27.23
  14   6   7 1127.84   22.98
  14   6   7 1073.13   22.68
  14  -6   8   22.57    3.07
  14   6   8   22.65    1.97
  14   6   8   19.30    1.72
  14  -6   9    1.43    1.50
  14   6   9    0.31    0.92
  14   6   9    3.04    1.10
  14  -6  10   86.81    6.08
  14   6  10   85.03    4.05
  14   6  10   81.73    4.29
  14  -6  11  319.57   12.87
  14   6  11  322.31    9.67
  14   6  11  324.08   10.22
  14  -6  12    5.16    2.12
  14   6  12    5.15    1.44
  14   6  12    9.60    1.73
  14  -8 -11   81.86    4.73
 -14   8  11   88.48    5.03
 -14   8  11   88.74    4.96
 -14   8  10  110.90    5.54
 -14  -8  10  117.30    5.11
 -14   8  10  122.47    5.69
  14  -8 -10  111.17    5.63
  14  -8  -9   17.75    2.37
 -14   8   9   22.44    2.46
 -14   8   9   19.81    2.44
 -14  -8   9   17.91    2.07
 -14   8   8  118.69    5.42
  14  -8  -8  120.56    5.83
 -14   8   8  123.63    5.60
 -14  -8   8  114.79    5.24
 -14   8   7  690.04   17.25
  14  -8  -7  713.59   18.48
 -14   8   6   59.70    3.62
 -14  -8   6   57.75    3.06
 -14   8   6   64.75    3.83
  14  -8  -6   60.01    4.12
  14  -8  -5  275.98    9.47
 -14  -8   5  243.76    7.24
 -14   8   5  252.69    8.33
 -14   8   5  254.36    8.49
  14  -8  -4   74.92    4.60
 -14  -8   4   69.15    2.44
 -14   8   4   78.73    4.12
 -14   8   4   77.38    4.16
 -14  -8   4   68.55    3.22
  14  -8  -3  322.29   10.62
 -14  -8   3  295.08    8.23
 -14  -8   3  290.65    6.77
 -14   8   3  325.17    9.82
 -14   8   3  325.13    9.57
  14  -8  -2  162.06    7.16
 -14   8   2  155.61    6.40
 -14   8   2  164.16    6.38
 -14  -8   2  155.91    5.38
  14  -8  -1 1271.97   29.85
 -14  -8   1 1200.92   26.82
 -14   8   1 1305.77   28.69
  14  -8   0  310.71   10.79
 -14   8   0  308.11   10.02
 -14   8   0  317.80    9.92
  14  -8   1   17.89    2.66
 -14   8  -1   22.55    2.78
 -14  -8  -1   17.42    1.81
  14   8   1   20.16    1.90
 -14   8  -1   20.72    2.34
  14  -8   2  110.99    6.06
  14   8   2  104.33    4.25
  14   8   2   89.29    2.70
 -14   8  -2  111.12    5.85
 -14  -8  -2  102.91    3.81
 -14  -8  -2   87.38    4.37
  14   8   3  501.33   10.67
  14  -8   3  501.05   15.45
 -14   8  -3  535.24   15.32
  14   8   3  508.24   12.44
 -14  -8  -3  510.03   12.23
  14   8   4    1.15    0.58
  14  -8   4    2.23    1.51
  14   8   4    1.70    0.88
 -14   8  -4    4.05    1.82
 -14  -8  -4    2.18    1.07
 -14  -8  -4    2.90    1.29
  14  -8   5   21.69    3.13
 -14   8  -5   26.65    3.21
  14   8   5   24.10    2.03
 -14  -8  -5   22.18    2.52
 -14  -8  -5   25.69    2.29
  14   8   5   25.63    1.50
  14  -8   6    7.18    2.13
  14   8   6    7.96    1.27
 -14   8  -6    6.53    2.02
 -14  -8  -6    9.61    1.62
  14   8   6    9.45    1.10
  14  -8   7  303.52   12.45
  14   8   7  334.92    9.20
  14   8   7  324.37    8.33
  14  -8   8    8.43    2.15
  14   8   8    9.34    1.41
 -14  -8  -8    9.74    1.81
  14   8   9   70.93    3.69
  14  -8   9   66.65    5.59
 -14  -8  -9   81.32    4.87
 -14  10   7   76.70    4.65
 -14 -10   7   77.59    4.80
 -14  10   7   78.02    4.82
  14 -10  -7   69.17    5.05
  14 -10  -6    1.39    1.56
 -14  10   6    3.04    1.69
  14 -10  -5    6.50    2.05
 -14  10   5    9.43    1.93
 -14  10   5    9.86    2.18
  14 -10  -4  226.48    9.44
 -14  10   4  227.59    8.71
 -14  10   4  225.99    8.61
  14 -10  -3  126.89    6.87
 -14  10   3  132.56    6.37
 -14  10   3  130.03    6.34
  14 -10  -2    8.52    2.13
 -14  10   2    4.90    1.69
 -14  10   2    6.89    1.93
  14 -10  -1  429.92   14.45
 -14  10   1  436.27   13.62
 -14  10   1  452.95   13.67
  14 -10   0  147.70    7.73
 -14  10   0  149.36    7.21
 -14  10   0  164.19    7.38
  14 -10   1   32.42    3.94
 -14  10  -1   35.12    3.70
  14 -10   2   73.25    5.48
 -14  10  -2   78.71    5.40
  14  10   2   68.44    3.99
  14 -10   3  101.83    6.53
 -14  10  -3  106.46    6.56
  14  10   3   95.32    4.75
  14 -10   4   19.07    3.07
  14  10   4   19.84    2.24
 -14  10  -4   21.06    3.14
 -15   1  16    2.84    1.99
 -15  -1  16    1.80    2.04
  15   1 -16   -0.86    1.06
  15  -1 -16    0.85    1.18
 -15  -1  16   -0.16    1.71
 -15  -1  15  459.50   14.72
 -15  -1  15  480.87   15.58
  15   1 -15  477.31   12.88
  15  -1 -15  458.54   13.15
 -15   1  15  481.54   15.09
 -15  -1  14  207.61    8.52
 -15  -1  14  214.45    9.12
  15  -1 -14  197.55    7.26
  15   1 -14  205.31    7.01
 -15   1  14  203.25    8.57
 -15  -1  13  385.85   12.29
 -15  -1  13  408.52   13.10
  15   1 -13  407.32   10.74
  15  -1 -13  400.57   11.12
 -15   1  13  381.46   12.44
 -15  -1  12  369.26   11.42
 -15   1  12  388.31   11.55
 -15  -1  12  382.05   12.10
  15   1 -12  376.26    9.93
  15  -1 -12  364.74   10.29
 -15   1  12  363.69   11.58
 -15   1  11    7.76    1.71
 -15  -1  11    6.17    1.51
 -15   1  11    7.41    1.52
  15   1 -11    8.21    1.21
  15  -1 -11    5.31    1.30
 -15  -1  11    8.65    1.73
 -15  -1  10  126.51    5.30
 -15   1  10  122.94    5.26
 -15  -1  10  129.78    5.74
  15   1 -10  130.50    4.39
 -15   1  10  130.32    5.58
  15  -1 -10  133.04    4.83
  15  -1  -9  142.79    4.12
  15  -1  -9  137.75    4.87
 -15  -1   9  135.74    5.28
 -15   1   9  144.56    5.44
 -15  -1   9  141.18    5.70
  15   1  -9  147.37    4.50
 -15  -1   9  143.37    3.35
 -15   1   9  140.03    5.56
 -15   1   8   41.90    2.72
 -15  -1   8   38.81    1.65
  15  -1  -8   38.66    2.01
  15  -1  -8   36.07    2.83
 -15  -1   8   37.25    2.37
 -15  -1   8   36.03    2.51
 -15   1   8   36.33    1.71
 -15   1   7 1432.62   29.67
 -15  -1   7 1429.59   28.52
  15  -1  -7 1389.35   29.16
  15  -1  -7 1424.70   30.61
 -15  -1   7 1449.06   29.37
 -15   1   7 1432.27   29.55
 -15  -1   7 1443.69   29.87
 -15   1   7 1441.79   28.36
 -15  -1   6  154.49    4.77
 -15   1   6  162.40    5.02
  15  -1  -6  153.24    5.07
  15  -1  -6  152.07    5.51
  15  -1  -6  155.24    5.56
 -15  -1   6  154.04    4.74
 -15   1   6  155.68    4.92
 -15  -1   6  146.99    4.97
 -15   1   6  158.74    4.57
 -15   1   6  152.00    4.96
 -15  -1   5    4.01    0.79
 -15   1   5    4.07    0.74
 -15  -1   5    2.69    0.79
  15  -1  -5    3.84    0.92
  15   1  -5    4.18    0.90
 -15   1   5    3.93    0.71
  15  -1  -5    2.99    0.92
  15  -1  -5    3.09    0.87
 -15   1   5    5.41    0.87
 -15  -1   5    3.43    0.53
 -15   1   5    3.71    0.73
 -15   1   4  255.74    6.81
 -15  -1   4  253.38    7.19
  15  -1  -4  248.30    7.33
  15   1  -4  233.34    7.22
 -15   1   4  251.66    6.12
  15  -1  -4  243.16    6.96
  15  -1  -4  244.23    6.84
 -15  -1   4  249.86    5.91
 -15  -1   4  244.31    5.83
 -15   1   4  235.19    6.47
 -15  -1   4  257.71    6.09
 -15   1   3 1307.73   26.60
 -15  -1   3 1301.17   24.76
 -15  -1   3 1322.87   27.17
  15  -1  -3 1248.22   27.27
  15   1  -3 1289.43   27.40
  15   1  -3 1260.38   25.59
  15  -1  -3 1303.65   26.35
  15  -1  -3 1287.64   26.01
 -15   1   3 1281.81   25.15
 -15  -1   3 1299.51   25.04
 -15   1   3 1279.54   25.74
 -15  -1   2    1.06    0.39
 -15   1   2   -0.04    0.62
  15  -1  -2   -0.07    0.39
 -15  -1   2    0.94    0.18
 -15  -1   2    1.68    0.91
  15  -1  -2    0.70    0.88
  15   1  -2   -0.11    0.77
  15   1  -2    0.54    0.35
  15  -1  -2    1.52    0.58
 -15   1   2    0.87    0.37
 -15   1   1  588.53   13.09
 -15   1   1  595.05   14.18
 -15  -1   1  620.47   12.26
  15  -1  -1  606.66   12.55
 -15   1   1  591.33   12.31
 -15  -1   1  603.40   14.68
  15  -1  -1  565.29   14.68
  15   1  -1  595.11   14.90
  15   1  -1  609.17   12.32
  15  -1  -1  607.99   13.17
 -15   1   0  149.00    5.30
 -15   1   0  146.68    4.44
 -15  -1   0  138.36    5.47
  15  -1   0  142.79    4.32
  15  -1   0  133.83    5.52
 -15  -1   0  144.05    3.75
  15   1   0  135.93    5.59
  15  -1   0  142.68    3.73
  15   1   0  147.58    3.70
 -15   1  -1  349.14    9.66
 -15   1  -1  347.65    8.57
 -15  -1  -1  343.86   10.05
  15  -1   1  326.39    9.99
  15   1   1  327.45   10.11
  15  -1   1  351.84    8.34
  15   1   1  349.20    7.63
  15  -1   1  344.97    7.54
 -15   1  -2   31.28    2.44
 -15  -1  -2   30.79    2.55
  15  -1   2   28.66    2.57
 -15   1  -2   26.40    1.85
  15   1   2   30.17    2.66
  15  -1   2   29.07    1.40
  15   1   2   30.61    1.07
  15   1   2   29.29    0.93
  15  -1   2   29.67    1.75
  15   1   2   36.12    1.59
  15   1   3 1632.61   31.74
 -15   1  -3 1578.09   34.02
 -15  -1  -3 1666.46   34.84
  15  -1   3 1651.80   31.39
  15  -1   3 1576.70   34.83
  15   1   3 1587.32   34.98
 -15   1  -3 1549.41   32.76
  15  -1   3 1653.85   32.29
  15   1   3 1597.45   31.25
  15  -1   4  674.71   15.17
 -15   1  -4  699.29   16.87
  15   1   4  686.30   14.79
 -15  -1  -4  693.25   17.40
  15  -1   4  696.51   14.44
  15  -1   4  657.91   17.50
  15   1   4  690.61   17.72
  15   1   4  671.26   14.59
  15  -1   5  700.31   14.88
 -15   1  -5  684.90   17.10
  15  -1   5  718.97   15.73
 -15  -1  -5  712.45   17.83
  15   1   5  700.76   15.29
  15  -1   5  648.71   17.74
  15   1   5  673.54   17.96
  15   1   5  674.12   15.29
 -15   1  -6  344.69   10.22
  15  -1   6  319.04    8.69
 -15  -1  -6  320.50   10.38
  15   1   6  312.57    8.46
  15  -1   6  312.06   10.54
  15   1   6  316.81   10.66
  15   1   6  308.60    8.59
 -15   1  -7 1508.58   31.98
  15  -1   7 1372.91   30.19
 -15  -1  -7 1487.05   32.54
  15   1   7 1432.42   30.03
  15  -1   7 1455.01   33.01
  15   1   7 1426.63   32.86
  15   1   7 1432.22   30.30
 -15   1  -8    6.41    1.46
 -15  -1  -8    5.03    1.60
  15  -1   8    3.84    1.07
  15  -1   8    4.43    1.51
  15   1   8    4.69    1.14
  15   1   8    5.46    1.70
  15   1   8    4.03    1.15
  15  -1   9    5.02    1.76
  15   1   9    4.06    1.13
  15   1   9    4.03    1.65
[truncated: 188,960 more chars]
