# Supplementary material
Source: MDPI journal article supplement (https://www.mdpi.com/2304-6740/7/4/44)
Supplement: s1 [file s1 › MAB2.cif]

data_MAB2

#2017ncs0204s

_audit_creation_date              2017-08-03
_audit_creation_method
;
Olex2 1.2-alpha
(compiled 2017.07.20 svn.r3457 for OlexSys, GUI svn.r5370)
;
_shelx_SHELXL_version_number      '2014/7'
_publ_contact_author_address      ?
_publ_contact_author_email        ?
_publ_contact_author_id_orcid     ?
_publ_contact_author_name         ''
_publ_contact_author_phone        ?
_publ_section_references
;
Dolomanov, O.V., Bourhis, L.J., Gildea, R.J, Howard, J.A.K. & Puschmann, H.
 (2009), J. Appl. Cryst. 42, 339-341.

Sheldrick, G.M. (2015). Acta Cryst. A71, 3-8.

Sheldrick, G.M. (2015). Acta Cryst. C71, 3-8.
;
_chemical_name_common             ?
_chemical_name_systematic         ?
_chemical_formula_moiety          'B12 H16 O28 Zn, 2(H4 N), 2(H2 O)'
_chemical_formula_sum             'B12 H28 N2 O30 Zn'
_chemical_formula_weight          731.33
_chemical_melting_point           ?
_chemical_oxdiff_formula          'Zn N3 B6 O15 H19'
_chemical_oxdiff_usercomment      MAB/M1/ZnNH3B
loop_
  _atom_type_symbol
  _atom_type_description
  _atom_type_scat_dispersion_real
  _atom_type_scat_dispersion_imag
  _atom_type_scat_source
 'B' 'B' 0.0013 0.0007 'International Tables Vol C Tables 4.2.6.8 and 6.1.1.4'
 'H' 'H' 0.0000 0.0000 'International Tables Vol C Tables 4.2.6.8 and 6.1.1.4'
 'N' 'N' 0.0061 0.0033 'International Tables Vol C Tables 4.2.6.8 and 6.1.1.4'
 'O' 'O' 0.0106 0.0060 'International Tables Vol C Tables 4.2.6.8 and 6.1.1.4'
 'Zn' 'Zn' 0.2839 1.4301 'International Tables Vol C Tables 4.2.6.8 and 6.1.1.4'

_shelx_space_group_comment
;
The symmetry employed for this shelxl refinement is uniquely defined
by the following loop, which should always be used as a source of
symmetry information in preference to the above space-group names.
They are only intended as comments.
;
_space_group_crystal_system       'triclinic'
_space_group_IT_number            2
_space_group_name_H-M_alt         'P -1'
_space_group_name_Hall            '-P 1'
loop_
  _space_group_symop_operation_xyz
 'x, y, z'
 '-x, -y, -z'

_cell_length_a                    7.4831(2)
_cell_length_b                    7.8551(2)
_cell_length_c                    11.0111(3)
_cell_angle_alpha                 108.065(2)
_cell_angle_beta                  95.020(2)
_cell_angle_gamma                 90.118(2)
_cell_volume                      612.68(3)
_cell_formula_units_Z             1
_cell_measurement_reflns_used     12584
_cell_measurement_temperature     100(2)
_cell_measurement_theta_max       30.5870
_cell_measurement_theta_min       2.8090
_shelx_estimated_absorpt_T_max    ?
_shelx_estimated_absorpt_T_min    ?
_exptl_absorpt_coefficient_mu     1.138
_exptl_absorpt_correction_T_max   1.00000
_exptl_absorpt_correction_T_min   0.93611
_exptl_absorpt_correction_type    multi-scan
_exptl_absorpt_process_details
;
CrysAlisPro 1.171.39.27b (Rigaku Oxford Diffraction, 2015)
Empirical absorption correction using spherical harmonics,
 implemented in SCALE3 ABSPACK scaling algorithm.
;
_exptl_absorpt_special_details    ?
_exptl_crystal_colour             colourless
_exptl_crystal_colour_primary     colourless
_exptl_crystal_density_diffrn     1.982
_exptl_crystal_density_meas       ?
_exptl_crystal_density_method     ?
_exptl_crystal_description        block
_exptl_crystal_F_000              372
_exptl_crystal_recrystallization_method
'The material was recrystallised from --- by as supplied'
_exptl_crystal_size_max           0.18
_exptl_crystal_size_mid           0.13
_exptl_crystal_size_min           0.05
_exptl_transmission_factor_max    ?
_exptl_transmission_factor_min    ?
_diffrn_reflns_av_R_equivalents   0.0314
_diffrn_reflns_av_unetI/netI      0.0193
_diffrn_reflns_Laue_measured_fraction_full 0.997
_diffrn_reflns_Laue_measured_fraction_max 0.998
_diffrn_reflns_limit_h_max        9
_diffrn_reflns_limit_h_min        -9
_diffrn_reflns_limit_k_max        10
_diffrn_reflns_limit_k_min        -10
_diffrn_reflns_limit_l_max        14
_diffrn_reflns_limit_l_min        -13
_diffrn_reflns_number             16475
_diffrn_reflns_point_group_measured_fraction_full 0.997
_diffrn_reflns_point_group_measured_fraction_max 0.998
_diffrn_reflns_theta_full         25.242
_diffrn_reflns_theta_max          27.476
_diffrn_reflns_theta_min          2.729
_diffrn_ambient_environment       N~2~
_diffrn_ambient_temperature       100(2)
_diffrn_detector                  'CCD area detector'
_diffrn_detector_area_resol_mean  28.5714
_diffrn_detector_type             'Rigaku HG Saturn724+ (2x2 bin mode)'
_diffrn_measured_fraction_theta_full 0.997
_diffrn_measured_fraction_theta_max 0.998
_diffrn_measurement_details
;
List of Runs (angles in degrees, time in seconds):

  # Type    Start    End  Width  t~exp~   \w     \q     \k     \f   Frames
--------------------------------------------------------------------------
  1  \w    -26.00  83.00   1.00    1.00    --   -6.10  32.00 -14.00  109
  2  \w    -96.00  14.00   1.00    1.00    --   -6.10 -38.00  30.00  110
  3  \w    -26.00  83.00   1.00    1.00    --   -6.10  38.00-180.00  109
  4  \w    -96.00  23.00   1.00    1.00    --   -6.10 -72.00-120.00  119
  5  \w    -84.00  30.00   1.00    1.00    --    5.00 -57.00 -90.00  114
  6  \w    -35.00  19.00   1.00    1.00    --   -6.10  72.00   0.00   54
  7  \w    -26.00  83.00   1.00    1.00    --   -6.10  38.00  90.00  109
;
_diffrn_measurement_device        'four-circle \k goniometer'
_diffrn_measurement_device_type
'Rigaku FRE+ equipped with HF Varimax confocal mirrors and an AFC12 goniometer and HG Saturn 724+ detector'
_diffrn_measurement_method        'profile data from \w-scans'
_diffrn_measurement_specimen_support 'MiTeGen MicroLoop'
_diffrn_orient_matrix_type
'CrysAlisPro convention (1999,Acta A55,543-557)'
_diffrn_orient_matrix_UB_11       0.0940937000
_diffrn_orient_matrix_UB_12       -0.0091370000
_diffrn_orient_matrix_UB_13       -0.0018173000
_diffrn_orient_matrix_UB_21       -0.0128187000
_diffrn_orient_matrix_UB_22       -0.0940510000
_diffrn_orient_matrix_UB_23       -0.0278621000
_diffrn_orient_matrix_UB_31       -0.0066784000
_diffrn_orient_matrix_UB_32       0.0100382000
_diffrn_orient_matrix_UB_33       -0.0620578000
_diffrn_radiation_collimation     0.2
_diffrn_radiation_monochromator   'Confocal mirrors, HF Varimax'
_diffrn_radiation_probe           x-ray
_diffrn_radiation_type            MoK\a
_diffrn_radiation_wavelength      0.71075
_diffrn_radiation_xray_symbol     K-L~3~
_diffrn_source                    'Rotating Anode'
_diffrn_source_current            55.0
_diffrn_source_power              2.475
_diffrn_source_target             Mo
_diffrn_source_type               'Rigaku FRE+'
_diffrn_source_voltage            45.0
_reflns_Friedel_coverage          0.000
_reflns_Friedel_fraction_full     .
_reflns_Friedel_fraction_max      .
_reflns_number_gt                 2774
_reflns_number_total              2799
_reflns_odcompleteness_completeness 99.82
_reflns_odcompleteness_iscentric  1
_reflns_odcompleteness_theta      27.42
_reflns_special_details
;
 Reflections were merged by SHELXL according to the crystal
 class for the calculation of statistics and refinement.
 
 _reflns_Friedel_fraction is defined as the number of unique
 Friedel pairs measured divided by the number that would be
 possible theoretically, ignoring centric projections and
 systematic absences.
;
_reflns_threshold_expression      'I > 2\s(I)'
_computing_cell_refinement        'CrysAlisPro 1.171.39.27b (Rigaku OD, 2015)'
_computing_data_collection        'CrysAlisPro 1.171.39.27b (Rigaku OD, 2015)'
_computing_data_reduction         'CrysAlisPro 1.171.39.27b (Rigaku OD, 2015)'
_computing_molecular_graphics     'Olex2 (Dolomanov et al., 2009)'
_computing_publication_material   'Olex2 (Dolomanov et al., 2009)'
_computing_structure_refinement   'ShelXL (Sheldrick, 2015)'
_computing_structure_solution     'ShelXT (Sheldrick, 2015)'
_refine_diff_density_max          0.350
_refine_diff_density_min          -0.471
_refine_diff_density_rms          0.088
_refine_ls_extinction_coef        .
_refine_ls_extinction_method      none
_refine_ls_goodness_of_fit_ref    1.068
_refine_ls_hydrogen_treatment     mixed
_refine_ls_matrix_type            full
_refine_ls_number_parameters      235
_refine_ls_number_reflns          2799
_refine_ls_number_restraints      6
_refine_ls_R_factor_all           0.0214
_refine_ls_R_factor_gt            0.0212
_refine_ls_restrained_S_all       1.084
_refine_ls_shift/su_max           0.000
_refine_ls_shift/su_mean          0.000
_refine_ls_structure_factor_coef  Fsqd
_refine_ls_weighting_details
'w=1/[\s^2^(Fo^2^)+(0.0262P)^2^+0.3998P] where P=(Fo^2^+2Fc^2^)/3'
_refine_ls_weighting_scheme       calc
_refine_ls_wR_factor_gt           0.0557
_refine_ls_wR_factor_ref          0.0559
_refine_special_details           ?
_olex2_refinement_description
;
1. Fixed Uiso
 At 1.5 times of:
  All O(H) groups, All O(H,H) groups
2. Restrained distances
 O11-H11
 0.85 with sigma of 0.01
 O12-H12
 0.85 with sigma of 0.01
 B1-H11
 1.945853 with sigma of 0.02
 Zn1-H11
 2.651307 with sigma of 0.02
 B2-H12
 1.919963 with sigma of 0.02
 Zn1-H12
 2.691362 with sigma of 0.02
3.a Free rotating group:
 O31(H31A,H31B)
3.b Rotating group:
 O21(H21A,H21B)
3.c Idealised tetrahedral OH refined as rotating group:
 O8(H8), O9(H9), O10(H10), O13(H13)
;
_atom_sites_solution_hydrogens    mixed
_atom_sites_solution_primary      dual
_atom_sites_solution_secondary    ?
loop_
  _atom_site_label
  _atom_site_type_symbol
  _atom_site_fract_x
  _atom_site_fract_y
  _atom_site_fract_z
  _atom_site_U_iso_or_equiv
  _atom_site_adp_type
  _atom_site_occupancy
  _atom_site_site_symmetry_order
  _atom_site_calc_flag
  _atom_site_refinement_flags_posn
  _atom_site_refinement_flags_adp
  _atom_site_refinement_flags_occupancy
  _atom_site_disorder_assembly
  _atom_site_disorder_group
 Zn1 Zn 1.0000 0.5000 1.0000 0.00633(7) Uani 1 2 d DS T P . .
 O1 O 0.77862(12) 0.63668(11) 0.77242(8) 0.00588(17) Uani 1 1 d . . . . .
 O2 O 0.53390(12) 0.56707(12) 0.88134(9) 0.00762(18) Uani 1 1 d . . . . .
 O3 O 0.67569(12) 0.85858(12) 0.95789(8) 0.00807(18) Uani 1 1 d . . . . .
 O4 O 0.88571(12) 0.94817(12) 0.84139(8) 0.00812(18) Uani 1 1 d . . . . .
 O5 O 0.87364(12) 0.77593(12) 0.62027(9) 0.00943(18) Uani 1 1 d . . . . .
 O6 O 0.77309(13) 0.47273(12) 0.54449(9) 0.00978(18) Uani 1 1 d . . . . .
 O7 O 0.58670(12) 0.37225(12) 0.67606(8) 0.00801(18) Uani 1 1 d . . . . .
 O8 O 0.40690(13) 0.79661(12) 1.03730(9) 0.01096(19) Uani 1 1 d . . . . .
 H8 H 0.4006 0.9086 1.0576 0.016 Uiso 1 1 calc GR . . . .
 O9 O 0.91272(13) 1.08616(12) 0.67790(9) 0.01104(19) Uani 1 1 d . . . . .
 H9 H 0.8919 1.1778 0.7382 0.017 Uiso 1 1 calc GR . . . .
 O10 O 0.57362(13) 0.21697(12) 0.45762(9) 0.01198(19) Uani 1 1 d . . . . .
 H10 H 0.6151 0.2205 0.3899 0.018 Uiso 1 1 calc GR . . . .
 O11 O 0.79560(12) 0.38806(11) 0.85796(8) 0.00654(17) Uani 1 1 d D . . . .
 H11 H 0.7251(16) 0.3233(18) 0.8847(14) 0.010 Uiso 1 1 d DR . . . .
 O12 O 0.97744(12) 0.74856(12) 0.96261(8) 0.00745(17) Uani 1 1 d D . . . .
 H12 H 1.017(2) 0.8410(14) 1.0222(12) 0.011 Uiso 1 1 d DR . . . .
 O13 O 1.05458(12) 0.55490(12) 0.67667(9) 0.01012(18) Uani 1 1 d . . . . .
 H13 H 1.1122 0.5447 0.6128 0.015 Uiso 1 1 calc GR . . . .
 O21 O 0.81643(12) 0.58097(12) 1.14305(9) 0.00902(18) Uani 1 1 d . . . . .
 H21A H 0.8508 0.5457 1.2082 0.014 Uiso 1 1 d GR . . . .
 H21B H 0.7107 0.5347 1.1122 0.014 Uiso 1 1 d GR . . . .
 B1 B 0.67048(18) 0.48990(18) 0.79572(13) 0.0063(3) Uani 1 1 d D . . . .
 B2 B 0.83205(18) 0.80037(18) 0.88528(13) 0.0069(3) Uani 1 1 d D . . . .
 B3 B 0.87218(19) 0.60799(18) 0.65037(13) 0.0079(3) Uani 1 1 d . . . . .
 B4 B 0.54111(19) 0.74051(19) 0.95705(13) 0.0083(3) Uani 1 1 d . . . . .
 B5 B 0.89120(19) 0.93623(19) 0.71497(14) 0.0089(3) Uani 1 1 d . . . . .
 B6 B 0.64762(19) 0.35700(19) 0.55975(14) 0.0090(3) Uani 1 1 d . . . . .
 N1 N 0.72967(16) 0.85816(16) 0.40321(11) 0.0106(2) Uani 1 1 d . . . . .
 H1A H 0.687(3) 0.968(3) 0.4317(19) 0.021(5) Uiso 1 1 d . . . . .
 H1B H 0.640(3) 0.780(3) 0.3581(19) 0.023(5) Uiso 1 1 d . . . . .
 H1C H 0.816(3) 0.862(3) 0.356(2) 0.027(5) Uiso 1 1 d . . . . .
 H1D H 0.776(3) 0.824(3) 0.470(2) 0.031(6) Uiso 1 1 d . . . . .
 O31 O 0.71372(14) 0.12897(14) 0.22290(10) 0.0174(2) Uani 1 1 d . . . . .
 H31A H 0.7886 0.2116 0.2250 0.026 Uiso 1 1 d G . . . .
 H31B H 0.7163 0.0443 0.1528 0.026 Uiso 1 1 d G . . . .

loop_
  _atom_site_aniso_label
  _atom_site_aniso_U_11
  _atom_site_aniso_U_22
  _atom_site_aniso_U_33
  _atom_site_aniso_U_23
  _atom_site_aniso_U_13
  _atom_site_aniso_U_12
 Zn1 0.00648(11) 0.00579(10) 0.00650(11) 0.00173(7) 0.00004(7) 0.00021(7)
 O1 0.0071(4) 0.0049(4) 0.0052(4) 0.0008(3) 0.0015(3) -0.0011(3)
 O2 0.0068(4) 0.0060(4) 0.0100(4) 0.0018(3) 0.0027(3) -0.0001(3)
 O3 0.0078(4) 0.0068(4) 0.0093(4) 0.0016(3) 0.0026(3) 0.0004(3)
 O4 0.0106(4) 0.0064(4) 0.0072(4) 0.0019(3) 0.0011(3) -0.0016(3)
 O5 0.0129(4) 0.0077(4) 0.0080(4) 0.0027(3) 0.0016(3) -0.0003(3)
 O6 0.0117(4) 0.0095(4) 0.0070(4) 0.0007(3) 0.0018(3) -0.0021(3)
 O7 0.0087(4) 0.0074(4) 0.0070(4) 0.0014(3) -0.0007(3) -0.0023(3)
 O8 0.0120(4) 0.0066(4) 0.0156(5) 0.0037(4) 0.0074(4) 0.0020(3)
 O9 0.0154(5) 0.0075(4) 0.0106(4) 0.0024(3) 0.0044(4) 0.0007(3)
 O10 0.0149(5) 0.0113(4) 0.0084(4) 0.0010(4) 0.0013(4) -0.0036(4)
 O11 0.0065(4) 0.0060(4) 0.0078(4) 0.0031(3) 0.0011(3) -0.0007(3)
 O12 0.0088(4) 0.0054(4) 0.0069(4) 0.0007(3) -0.0014(3) -0.0004(3)
 O13 0.0097(4) 0.0136(4) 0.0078(4) 0.0037(4) 0.0031(3) 0.0018(3)
 O21 0.0077(4) 0.0105(4) 0.0087(4) 0.0028(3) 0.0010(3) -0.0007(3)
 B1 0.0057(6) 0.0056(6) 0.0073(6) 0.0018(5) 0.0003(5) -0.0007(5)
 B2 0.0073(6) 0.0062(6) 0.0071(6) 0.0016(5) 0.0010(5) -0.0003(5)
 B3 0.0091(6) 0.0077(6) 0.0070(6) 0.0023(5) 0.0021(5) -0.0001(5)
 B4 0.0090(6) 0.0087(6) 0.0082(6) 0.0041(5) 0.0004(5) 0.0010(5)
 B5 0.0069(6) 0.0097(6) 0.0104(7) 0.0032(5) 0.0016(5) 0.0000(5)
 B6 0.0090(6) 0.0082(6) 0.0096(6) 0.0026(5) 0.0000(5) 0.0008(5)
 N1 0.0114(5) 0.0102(5) 0.0099(5) 0.0027(4) 0.0013(4) -0.0008(4)
 O31 0.0190(5) 0.0173(5) 0.0125(5) -0.0011(4) 0.0041(4) -0.0063(4)

_geom_special_details
;
 All esds (except the esd in the dihedral angle between two l.s. planes)
 are estimated using the full covariance matrix.  The cell esds are taken
 into account individually in the estimation of esds in distances, angles
 and torsion angles; correlations between esds in cell parameters are only
 used when they are defined by crystal symmetry.  An approximate (isotropic)
 treatment of cell esds is used for estimating esds involving l.s. planes.
;
loop_
  _geom_bond_atom_site_label_1
  _geom_bond_atom_site_label_2
  _geom_bond_distance
  _geom_bond_site_symmetry_2
  _geom_bond_publ_flag
 Zn1 O11 2.0692(9) 2_767 ?
 Zn1 O11 2.0692(9) . ?
 Zn1 O12 2.1208(9) 2_767 ?
 Zn1 O12 2.1208(9) . ?
 Zn1 O21 2.1292(9) . ?
 Zn1 O21 2.1292(9) 2_767 ?
 O1 B1 1.5053(15) . ?
 O1 B2 1.5091(15) . ?
 O1 B3 1.5247(16) . ?
 O2 B1 1.4552(16) . ?
 O2 B4 1.3570(17) . ?
 O3 B2 1.4685(16) . ?
 O3 B4 1.3652(17) . ?
 O4 B2 1.4569(16) . ?
 O4 B5 1.3701(17) . ?
 O5 B3 1.4567(16) . ?
 O5 B5 1.3606(17) . ?
 O6 B3 1.4543(16) . ?
 O6 B6 1.3620(17) . ?
 O7 B1 1.4426(15) . ?
 O7 B6 1.3673(17) . ?
 O8 H8 0.8400 . ?
 O8 B4 1.3781(17) . ?
 O9 H9 0.8400 . ?
 O9 B5 1.3742(17) . ?
 O10 H10 0.8400 . ?
 O10 B6 1.3793(17) . ?
 O11 H11 0.862(9) . ?
 O11 B1 1.4889(15) . ?
 O12 H12 0.845(8) . ?
 O12 B2 1.4591(16) . ?
 O13 H13 0.8400 . ?
 O13 B3 1.4591(16) . ?
 O21 H21A 0.8657 . ?
 O21 H21B 0.8652 . ?
 N1 H1A 0.89(2) . ?
 N1 H1B 0.91(2) . ?
 N1 H1C 0.87(2) . ?
 N1 H1D 0.90(2) . ?
 O31 H31A 0.8502 . ?
 O31 H31B 0.8501 . ?

loop_
  _geom_angle_atom_site_label_1
  _geom_angle_atom_site_label_2
  _geom_angle_atom_site_label_3
  _geom_angle
  _geom_angle_site_symmetry_1
  _geom_angle_site_symmetry_3
  _geom_angle_publ_flag
 O11 Zn1 O11 180.0 2_767 . ?
 O11 Zn1 O12 90.68(3) . . ?
 O11 Zn1 O12 89.32(3) 2_767 . ?
 O11 Zn1 O12 89.32(3) . 2_767 ?
 O11 Zn1 O12 90.68(3) 2_767 2_767 ?
 O11 Zn1 O21 92.10(3) . . ?
 O11 Zn1 O21 92.10(3) 2_767 2_767 ?
 O11 Zn1 O21 87.90(3) . 2_767 ?
 O11 Zn1 O21 87.90(3) 2_767 . ?
 O12 Zn1 O12 180.00(7) 2_767 . ?
 O12 Zn1 O21 89.14(3) . 2_767 ?
 O12 Zn1 O21 89.14(3) 2_767 . ?
 O12 Zn1 O21 90.86(3) . . ?
 O12 Zn1 O21 90.86(3) 2_767 2_767 ?
 O21 Zn1 O21 180.00(5) . 2_767 ?
 B1 O1 B2 117.90(9) . . ?
 B1 O1 B3 122.22(9) . . ?
 B2 O1 B3 118.22(9) . . ?
 B4 O2 B1 122.97(10) . . ?
 B4 O3 B2 121.46(10) . . ?
 B5 O4 B2 124.06(10) . . ?
 B5 O5 B3 121.04(10) . . ?
 B6 O6 B3 123.90(10) . . ?
 B6 O7 B1 123.18(10) . . ?
 B4 O8 H8 109.5 . . ?
 B5 O9 H9 109.5 . . ?
 B6 O10 H10 109.5 . . ?
 Zn1 O11 H11 109.4(9) . . ?
 B1 O11 Zn1 125.35(7) . . ?
 B1 O11 H11 103.7(9) . . ?
 Zn1 O12 H12 117.0(9) . . ?
 B2 O12 Zn1 126.70(7) . . ?
 B2 O12 H12 108.3(9) . . ?
 B3 O13 H13 109.5 . . ?
 Zn1 O21 H21A 110.5 . . ?
 Zn1 O21 H21B 110.1 . . ?
 H21A O21 H21B 108.5 . . ?
 O2 B1 O1 109.94(10) . . ?
 O2 B1 O11 109.11(10) . . ?
 O7 B1 O1 110.34(10) . . ?
 O7 B1 O2 109.80(10) . . ?
 O7 B1 O11 110.01(10) . . ?
 O11 B1 O1 107.60(10) . . ?
 O3 B2 O1 108.98(10) . . ?
 O4 B2 O1 110.48(10) . . ?
 O4 B2 O3 106.84(10) . . ?
 O4 B2 O12 112.13(10) . . ?
 O12 B2 O1 106.80(10) . . ?
 O12 B2 O3 111.60(10) . . ?
 O5 B3 O1 108.43(10) . . ?
 O5 B3 O13 110.86(10) . . ?
 O6 B3 O1 109.72(10) . . ?
 O6 B3 O5 108.55(10) . . ?
 O6 B3 O13 112.19(10) . . ?
 O13 B3 O1 107.01(10) . . ?
 O2 B4 O3 122.87(12) . . ?
 O2 B4 O8 117.64(11) . . ?
 O3 B4 O8 119.49(12) . . ?
 O4 B5 O9 121.43(12) . . ?
 O5 B5 O4 121.65(12) . . ?
 O5 B5 O9 116.91(12) . . ?
 O6 B6 O7 122.49(12) . . ?
 O6 B6 O10 121.58(12) . . ?
 O7 B6 O10 115.93(12) . . ?
 H1A N1 H1B 110.0(18) . . ?
 H1A N1 H1C 108.0(18) . . ?
 H1A N1 H1D 109.8(18) . . ?
 H1B N1 H1C 111.2(18) . . ?
 H1B N1 H1D 109.9(18) . . ?
 H1C N1 H1D 107.8(19) . . ?
 H31A O31 H31B 109.4 . . ?

loop_
  _geom_hbond_atom_site_label_D
  _geom_hbond_atom_site_label_H
  _geom_hbond_atom_site_label_A
  _geom_hbond_distance_DH
  _geom_hbond_distance_HA
  _geom_hbond_distance_DA
  _geom_hbond_angle_DHA
  _geom_hbond_site_symmetry_A
 O8 H8 O3 0.84 1.97 2.7649(13) 157.5 2_677
 O9 H9 O11 0.84 1.95 2.7785(13) 168.2 1_565
 O10 H10 O31 0.84 1.97 2.7615(14) 157.7 .
 O11 H11 O8 0.862(9) 1.802(9) 2.6580(13) 172.0(14) 2_667
 O12 H12 O4 0.845(8) 1.948(9) 2.7922(12) 178.2(16) 2_777
 O13 H13 O6 0.84 1.97 2.8042(13) 174.7 2_766
 O21 H21A O13 0.87 1.79 2.6446(13) 169.7 2_767
 O21 H21B O2 0.87 2.01 2.8227(12) 155.7 2_667
 N1 H1A O10 0.89(2) 2.08(2) 2.9589(15) 168.0(18) 1_565
 N1 H1B O7 0.91(2) 2.01(2) 2.8781(15) 158.7(18) 2_666
 N1 H1C O9 0.87(2) 2.16(2) 2.9674(16) 154.8(19) 2_776
 N1 H1D O5 0.90(2) 1.90(2) 2.7928(15) 175(2) .
 O31 H31A O13 0.85 2.11 2.8878(14) 152.0 2_766
 O31 H31B O3 0.85 2.18 3.0192(13) 167.4 1_544

loop_
  _geom_torsion_atom_site_label_1
  _geom_torsion_atom_site_label_2
  _geom_torsion_atom_site_label_3
  _geom_torsion_atom_site_label_4
  _geom_torsion
  _geom_torsion_site_symmetry_1
  _geom_torsion_site_symmetry_2
  _geom_torsion_site_symmetry_3
  _geom_torsion_site_symmetry_4
  _geom_torsion_publ_flag
 Zn1 O11 B1 O1 41.12(12) . . . . ?
 Zn1 O11 B1 O2 -78.13(11) . . . . ?
 Zn1 O11 B1 O7 161.36(7) . . . . ?
 Zn1 O12 B2 O1 -38.31(13) . . . . ?
 Zn1 O12 B2 O3 80.70(12) . . . . ?
 Zn1 O12 B2 O4 -159.47(7) . . . . ?
 B1 O1 B2 O3 -45.64(13) . . . . ?
 B1 O1 B2 O4 -162.74(10) . . . . ?
 B1 O1 B2 O12 75.06(12) . . . . ?
 B1 O1 B3 O5 147.86(10) . . . . ?
 B1 O1 B3 O6 29.45(15) . . . . ?
 B1 O1 B3 O13 -92.50(12) . . . . ?
 B1 O2 B4 O3 1.13(19) . . . . ?
 B1 O2 B4 O8 -177.88(11) . . . . ?
 B1 O7 B6 O6 -11.41(19) . . . . ?
 B1 O7 B6 O10 168.87(11) . . . . ?
 B2 O1 B1 O2 41.62(14) . . . . ?
 B2 O1 B1 O7 162.88(10) . . . . ?
 B2 O1 B1 O11 -77.10(12) . . . . ?
 B2 O1 B3 O5 -47.12(14) . . . . ?
 B2 O1 B3 O6 -165.52(10) . . . . ?
 B2 O1 B3 O13 72.52(13) . . . . ?
 B2 O3 B4 O2 -6.04(19) . . . . ?
 B2 O3 B4 O8 172.96(11) . . . . ?
 B2 O4 B5 O5 -10.58(19) . . . . ?
 B2 O4 B5 O9 168.68(11) . . . . ?
 B3 O1 B1 O2 -153.31(10) . . . . ?
 B3 O1 B1 O7 -32.06(15) . . . . ?
 B3 O1 B1 O11 87.97(12) . . . . ?
 B3 O1 B2 O3 148.68(10) . . . . ?
 B3 O1 B2 O4 31.58(14) . . . . ?
 B3 O1 B2 O12 -90.62(12) . . . . ?
 B3 O5 B5 O4 -8.27(19) . . . . ?
 B3 O5 B5 O9 172.44(11) . . . . ?
 B3 O6 B6 O7 8.5(2) . . . . ?
 B3 O6 B6 O10 -171.79(11) . . . . ?
 B4 O2 B1 O1 -18.27(16) . . . . ?
 B4 O2 B1 O7 -139.85(11) . . . . ?
 B4 O2 B1 O11 99.51(13) . . . . ?
 B4 O3 B2 O1 26.90(15) . . . . ?
 B4 O3 B2 O4 146.29(11) . . . . ?
 B4 O3 B2 O12 -90.81(13) . . . . ?
 B5 O4 B2 O1 -1.79(16) . . . . ?
 B5 O4 B2 O3 -120.20(12) . . . . ?
 B5 O4 B2 O12 117.23(13) . . . . ?
 B5 O5 B3 O1 34.83(15) . . . . ?
 B5 O5 B3 O6 153.98(11) . . . . ?
 B5 O5 B3 O13 -82.36(14) . . . . ?
 B6 O6 B3 O1 -16.47(16) . . . . ?
 B6 O6 B3 O5 -134.80(12) . . . . ?
 B6 O6 B3 O13 102.33(14) . . . . ?
 B6 O7 B1 O1 21.84(16) . . . . ?
 B6 O7 B1 O2 143.18(11) . . . . ?
 B6 O7 B1 O11 -96.72(13) . . . . ?

_shelx_res_file
;
    2017ncs0204s.res created by SHELXL-2014/7

TITL 2017ncs0204s_a.res in P-1
REM Old TITL 2017ncs0204_1b in P1
REM SHELXT solution in P-1
REM R1 0.057, Rweak 0.009, Alpha 0.040, Orientation as input
REM Formula found by SHELXT: B12 N4 O28 Zn
CELL 0.71075 7.4831 7.8551 11.0111 108.065 95.02 90.118
ZERR 1 0.0002 0.0002 0.0003 0.002 0.002 0.002
LATT 1
SFAC B H N O Zn
UNIT 12 28 2 30 1
EQIV $1 1-X,2-Y,2-Z
EQIV $2 2-X,2-Y,2-Z
EQIV $3 2-X,1-Y,1-Z
EQIV $4 2-X,1-Y,2-Z
EQIV $5 1-X,1-Y,1-Z
EQIV $6 2-X,2-Y,1-Z
EQIV $7 +X,-1+Y,-1+Z
EQIV $8 +X,1+Y,+Z
EQIV $9 1-X,1-Y,2-Z
DFIX 0.85 0.01 O11 H11
DFIX 0.85 0.01 O12 H12
DANG 1.945853 0.02 B1 H11
DANG 2.651307 0.02 Zn1 H11
DANG 1.919963 0.02 B2 H12
DANG 2.691362 0.02 Zn1 H12

L.S. 10
PLAN  20
TEMP -173(2)
HTAB O8 O3_$1
HTAB O9 O11_$8
HTAB O10 O31
HTAB O11 O8_$9
HTAB O12 O4_$2
HTAB O13 O6_$3
HTAB O21 O13_$4
HTAB O21 O2_$9
HTAB N1 O10_$8
HTAB N1 O7_$5
HTAB N1 O9_$6
HTAB N1 O5
HTAB O31 O13_$3
HTAB O31 O3_$7
htab
BOND $H
conf
fmap 2
acta
OMIT -2 0 4
REM <olex2.extras>
REM <HklSrc "%.\\2017ncs0204s.hkl">
REM </olex2.extras>

WGHT    0.026200    0.399800
FVAR       0.98835
ZN1   5    1.000000    0.500000    1.000000    10.50000    0.00648    0.00579 =
         0.00650    0.00173    0.00004    0.00021
O1    4    0.778621    0.636680    0.772421    11.00000    0.00712    0.00494 =
         0.00523    0.00085    0.00147   -0.00115
O2    4    0.533904    0.567072    0.881343    11.00000    0.00677    0.00599 =
         0.00997    0.00177    0.00270   -0.00008
O3    4    0.675694    0.858580    0.957885    11.00000    0.00782    0.00681 =
         0.00928    0.00159    0.00258    0.00042
O4    4    0.885709    0.948166    0.841385    11.00000    0.01061    0.00645 =
         0.00720    0.00190    0.00113   -0.00161
O5    4    0.873641    0.775933    0.620267    11.00000    0.01290    0.00767 =
         0.00802    0.00272    0.00163   -0.00031
O6    4    0.773089    0.472729    0.544492    11.00000    0.01174    0.00947 =
         0.00701    0.00075    0.00176   -0.00208
O7    4    0.586704    0.372251    0.676058    11.00000    0.00872    0.00744 =
         0.00699    0.00140   -0.00075   -0.00229
O8    4    0.406904    0.796609    1.037304    11.00000    0.01199    0.00657 =
         0.01565    0.00372    0.00739    0.00195
AFIX 147
H8    2    0.400608    0.908558    1.057595    11.00000   -1.50000
AFIX   0
O9    4    0.912724    1.086157    0.677896    11.00000    0.01535    0.00749 =
         0.01058    0.00239    0.00438    0.00072
AFIX 147
H9    2    0.891856    1.177761    0.738225    11.00000   -1.50000
AFIX   0
O10   4    0.573624    0.216971    0.457623    11.00000    0.01487    0.01129 =
         0.00839    0.00100    0.00126   -0.00357
AFIX 147
H10   2    0.615073    0.220529    0.389949    11.00000   -1.50000
AFIX   0
O11   4    0.795599    0.388064    0.857962    11.00000    0.00649    0.00601 =
         0.00780    0.00305    0.00105   -0.00071
H11   2    0.725116    0.323348    0.884702    11.00000   -1.50000
O12   4    0.977436    0.748560    0.962615    11.00000    0.00878    0.00544 =
         0.00686    0.00067   -0.00136   -0.00040
H12   2    1.016517    0.841048    1.022152    11.00000   -1.50000
O13   4    1.054580    0.554897    0.676674    11.00000    0.00967    0.01356 =
         0.00777    0.00365    0.00307    0.00178
AFIX 147
H13   2    1.112241    0.544690    0.612797    11.00000   -1.50000
AFIX   0
O21   4    0.816434    0.580974    1.143047    11.00000    0.00774    0.01049 =
         0.00871    0.00277    0.00097   -0.00069
AFIX   7
H21A  2    0.850801    0.545705    1.208235    11.00000   -1.50000
H21B  2    0.710693    0.534744    1.112198    11.00000   -1.50000
AFIX   0
B1    1    0.670481    0.489898    0.795722    11.00000    0.00570    0.00562 =
         0.00726    0.00184    0.00030   -0.00069
B2    1    0.832047    0.800374    0.885277    11.00000    0.00725    0.00621 =
         0.00706    0.00156    0.00101   -0.00035
B3    1    0.872178    0.607993    0.650368    11.00000    0.00907    0.00770 =
         0.00701    0.00227    0.00209   -0.00009
B4    1    0.541112    0.740513    0.957054    11.00000    0.00899    0.00870 =
         0.00819    0.00415    0.00036    0.00096
B5    1    0.891198    0.936227    0.714970    11.00000    0.00687    0.00967 =
         0.01040    0.00321    0.00158    0.00004
B6    1    0.647621    0.356996    0.559748    11.00000    0.00898    0.00823 =
         0.00962    0.00260   -0.00004    0.00082

N1    3    0.729672    0.858163    0.403212    11.00000    0.01139    0.01023 =
         0.00986    0.00275    0.00135   -0.00081
H1A   2    0.687429    0.968169    0.431675    11.00000    0.02073
H1B   2    0.640307    0.780105    0.358079    11.00000    0.02348
H1C   2    0.815502    0.861563    0.356011    11.00000    0.02651
H1D   2    0.776142    0.824349    0.469605    11.00000    0.03145
AFIX   6
O31   4    0.713722    0.128966    0.222902    11.00000    0.01897    0.01733 =
         0.01254   -0.00110    0.00411   -0.00631
H31A  2    0.788571    0.211640    0.225022    11.00000   -1.50000
H31B  2    0.716291    0.044256    0.152831    11.00000   -1.50000
AFIX   0
HKLF 4

REM  2017ncs0204s_a.res in P-1
REM R1 =  0.0212 for    2774 Fo > 4sig(Fo)  and  0.0214 for all    2799 data
REM    235 parameters refined using      6 restraints

END

WGHT      0.0262      0.3916

REM Instructions for potential hydrogen bonds
HTAB O8 O3_$1
HTAB O8 O4_$1
HTAB O9 O11_$8
HTAB O10 O31
HTAB O11 O8_$9
HTAB O12 O4_$2
HTAB O13 O6_$3
HTAB O21 O13_$4
HTAB O21 O2_$9
HTAB N1 O10_$8
HTAB N1 O7_$5
HTAB N1 O9_$6
HTAB N1 O5
HTAB O31 O13_$3
HTAB O31 O3_$7

REM Highest difference peak  0.350,  deepest hole -0.471,  1-sigma level  0.088
Q1    1   0.4690  0.8379  1.1070  11.00000  0.05    0.35
Q2    1   0.7458  0.8262  0.9244  11.00000  0.05    0.32
Q3    1   0.6534  0.9132  0.9656  11.00000  0.05    0.31
Q4    1   0.8009  0.7064  0.8187  11.00000  0.05    0.27
Q5    1   0.5987  0.5361  0.8459  11.00000  0.05    0.27
Q6    1   0.8874  0.9425  0.7828  11.00000  0.05    0.27
Q7    1   0.8336  1.0157  0.8046  11.00000  0.05    0.26
Q8    1   0.4693  0.7777  1.0018  11.00000  0.05    0.26
Q9    1   0.7298  1.0091  0.8400  11.00000  0.05    0.26
Q10   1   0.7658  1.0004  0.8185  11.00000  0.05    0.25
Q11   1   0.8552  0.8846  0.8549  11.00000  0.05    0.25
Q12   1   0.6207  0.7996  0.9549  11.00000  0.05    0.25
Q13   1   0.5526  0.6343  0.9207  11.00000  0.05    0.24
Q14   1   0.3859  0.0341  0.4005  11.00000  0.05    0.24
Q15   1   0.8928  1.0164  0.6960  11.00000  0.05    0.23
Q16   1   0.9095  0.7695  0.9244  11.00000  0.05    0.22
Q17   1   0.6134  0.4303  0.7252  11.00000  0.05    0.21
Q18   1   0.7448  0.9818  0.9230  11.00000  0.05    0.21
Q19   1   0.7144  1.0345  0.6051  11.00000  0.05    0.21
Q20   1   0.5177 -0.0064  0.2595  11.00000  0.05    0.21
;
_shelx_res_checksum               42974
_shelx_hkl_file
;
  -9  -3   0    5.78    2.80
  -9  -3   1   17.97    4.43
  -9  -3   1   19.00    3.52
  -9  -3   2    1.95    1.89
  -9  -3   3   62.03    8.34
  -9  -3   4   19.55    4.83
  -9  -2  -2   22.86    5.30
  -9  -2  -1  287.74   19.84
  -9  -2   0  205.92   15.90
  -9  -2   0  163.19   10.56
  -9  -2   1  186.91   11.40
  -9  -2   1  191.34   12.06
  -9  -2   2   42.17    7.15
  -9  -2   2   36.48    5.18
  -9  -2   3  129.48   12.45
  -9  -2   4   36.20    6.61
  -9  -2   5    3.72    2.49
  -9  -2   6   48.44    7.82
  -9  -1  -3   66.32    9.17
  -9  -1  -2  160.93   14.50
  -9  -1  -1  118.62   12.30
  -9  -1  -1  118.42    8.43
  -9  -1   0  713.47   26.62
  -9  -1   0  768.29   27.30
  -9  -1   1   53.41    6.06
  -9  -1   1   65.46    9.08
  -9  -1   2  248.58   14.74
  -9  -1   2  284.54   19.14
  -9  -1   3  130.28   12.77
  -9  -1   4  154.79   13.97
  -9  -1   5  139.91   13.54
  -9  -1   6   57.89    8.65
  -9   0  -3    8.09    3.70
  -9   0  -2   81.77    7.02
  -9   0  -2   92.86   10.94
  -9   0  -1   99.22   11.00
  -9   0  -1   89.11    7.10
  -9   0  -1   81.01    7.18
  -9   0   0  520.16   21.31
  -9   0   0  570.40   28.96
  -9   0   1  130.93    9.66
  -9   0   1  147.50   13.75
  -9   0   2  200.97   16.25
  -9   0   2  192.53   12.51
  -9   0   3  181.50   15.43
  -9   0   4   71.16    9.55
  -9   0   5  295.05   20.57
  -9   0   6   69.81    9.89
  -9   1  -4   75.13    9.97
  -9   1  -3  208.66   16.71
  -9   1  -2  119.69   12.25
  -9   1  -2   96.30    8.58
  -9   1  -2   96.74    8.07
  -9   1  -1    0.40    0.81
  -9   1  -1    3.72    2.80
  -9   1   0    6.21    1.89
  -9   1   0    4.21    2.60
  -9   1   1  173.12   15.04
  -9   1   1  143.53   10.34
  -9   1   2   70.17    9.51
  -9   1   2   56.31    6.53
  -9   1   3   34.34    6.81
  -9   1   4  377.07   23.87
  -9   1   5  430.67   26.16
  -9   2  -4  196.38   16.42
  -9   2  -3   59.58    8.73
  -9   2  -2    0.37    0.78
  -9   2  -2   -0.53    1.38
  -9   2  -2    2.37    1.75
  -9   2  -1   63.53    9.12
  -9   2  -1   71.24    6.45
  -9   2   0  205.56   16.75
  -9   2   0  177.64   11.36
  -9   2   1   36.57    5.19
  -9   2   1   37.22    7.17
  -9   2   2  366.26   23.53
  -9   2   3   55.68    8.85
  -9   2   4  111.58   13.03
  -9   3  -3  187.59   16.03
  -9   3  -2  451.51   25.76
  -9   3  -2  385.78   16.40
  -9   3  -1   53.97    5.70
  -9   3  -1   54.62    8.56
  -9   3   0   16.62    5.11
  -9   3   0   28.56    4.50
  -9   3   0   32.72    4.63
  -9   3   1  214.22   17.74
  -9   3   2  976.01   42.95
  -8  -5   0  182.11   14.69
  -8  -5   0  160.33    9.49
  -8  -5   1   12.83    3.81
  -8  -5   1   10.33    2.55
  -8  -5   2   72.16    6.92
  -8  -5   2   72.35    8.52
  -8  -5   2   56.84    5.84
  -8  -5   3    4.07    2.06
  -8  -5   3    5.19    1.66
  -8  -5   4  199.93   13.05
  -8  -5   4  189.61   14.02
  -8  -5   5    7.13    2.83
  -8  -5   5    3.17    2.02
  -8  -5   6    1.71    1.42
  -8  -5   6    1.46    1.99
  -8  -5   7   13.23    3.34
  -8  -5   7   12.42    3.58
  -8  -4  -2    6.63    2.55
  -8  -4  -2    8.07    3.00
  -8  -4  -1   29.45    3.57
  -8  -4  -1   22.03    3.58
  -8  -4  -1   15.62    4.49
  -8  -4   0  178.05   11.21
  -8  -4   0  171.62    9.57
  -8  -4   0  171.10   10.02
  -8  -4   1  602.03   22.10
  -8  -4   1  621.88   28.58
  -8  -4   1  596.54   24.15
  -8  -4   2  108.47    9.18
  -8  -4   2  110.97    8.12
  -8  -4   2  124.97   11.29
  -8  -4   3   24.17    3.83
  -8  -4   3   24.19    4.83
  -8  -4   4   68.53    8.09
  -8  -4   5  386.90   20.58
  -8  -4   6  143.59   11.75
  -8  -4   7  223.50   14.82
  -8  -3  -4    5.72    3.33
  -8  -3  -4    5.67    2.29
  -8  -3  -3  102.76    9.61
  -8  -3  -3  124.13   12.04
  -8  -3  -2  341.14   13.70
  -8  -3  -2  350.45   21.04
  -8  -3  -2  371.67   15.21
  -8  -3  -1   76.44    5.64
  -8  -3  -1   71.91    6.31
  -8  -3  -1   83.63    9.65
  -8  -3   0    1.67    1.56
  -8  -3   0    1.24    0.81
  -8  -3   0    2.98    2.59
  -8  -3   1   60.12    5.64
  -8  -3   1   62.69    6.33
  -8  -3   1   69.77    8.32
  -8  -3   2  368.40   16.71
  -8  -3   2  374.87   18.05
  -8  -3   3  138.39   11.89
  -8  -3   3  135.29   10.39
  -8  -3   3  142.38    9.63
  -8  -3   5  460.91   23.51
  -8  -3   6  403.93   21.61
  -8  -3   7   67.76    8.03
  -8  -3   8  163.22   12.96
  -8  -2  -5   61.17    8.72
  -8  -2  -5   66.00    7.19
  -8  -2  -4  436.74   20.64
  -8  -2  -4  437.88   24.47
  -8  -2  -3   70.43    8.99
  -8  -2  -2 1094.47   41.18
  -8  -2  -2 1021.50   31.02
  -8  -2  -2 1002.67   30.30
  -8  -2  -1  773.82   25.72
  -8  -2  -1  777.37   33.11
  -8  -2  -1  754.01   24.89
  -8  -2   0  105.09    7.75
  -8  -2   0   87.89    6.96
  -8  -2   0   87.26    9.68
  -8  -2   1    3.84    1.86
  -8  -2   1    7.55    2.89
  -8  -2   1    5.03    1.51
  -8  -2   2  133.01    9.70
  -8  -2   2  121.94    8.79
  -8  -2   2  129.45   11.60
  -8  -2   3  101.18    8.11
  -8  -2   3   94.17    8.44
  -8  -2   3  107.24   10.60
  -8  -2   4  418.70   22.09
  -8  -2   4  388.21   19.49
  -8  -2   5  270.26   17.43
  -8  -2   6  106.94   10.69
  -8  -2   7  186.20   14.53
  -8  -2   8    9.52    3.42
  -8  -2   9   89.07   10.06
  -8  -1  -6    6.03    2.03
  -8  -1  -6    9.72    3.79
  -8  -1  -5   18.67    4.62
  -8  -1  -5   11.46    2.75
  -8  -1  -5   11.87    2.90
  -8  -1  -4    2.70    1.98
  -8  -1  -4    1.45    1.33
  -8  -1  -3  236.82   16.75
  -8  -1  -3  236.32   10.87
  -8  -1  -3  222.35   13.23
  -8  -1  -3  245.59    9.83
  -8  -1  -2  971.97   37.89
  -8  -1  -2  873.82   31.77
  -8  -1  -2  889.92   27.50
  -8  -1  -2  912.68   28.50
  -8  -1  -1   78.92    6.17
  -8  -1  -1   83.58    6.41
  -8  -1  -1   77.21    9.09
  -8  -1  -1   85.89    7.92
  -8  -1   0    1.17    1.17
  -8  -1   0    3.06    1.31
  -8  -1   0    3.75    2.39
  -8  -1   0    5.26    2.18
  -8  -1   1    3.85    1.52
  -8  -1   1    5.38    2.24
  -8  -1   1    7.54    2.17
  -8  -1   1    6.52    2.58
  -8  -1   2  218.37   12.23
  -8  -1   2  229.16   12.95
  -8  -1   2  222.84   15.86
  -8  -1   2  210.26   13.54
  -8  -1   3   93.57    8.31
  -8  -1   3  103.08   10.43
  -8  -1   3   90.29    7.68
  -8  -1   4  265.32   15.10
  -8  -1   4  276.26   17.91
  -8  -1   5  426.07   23.11
  -8  -1   6   38.58    6.53
  -8  -1   7  310.50   19.61
  -8  -1   8  200.01   15.76
  -8  -1   9   15.18    4.47
  -8   0  -6    1.61    1.90
  -8   0  -6    1.66    1.29
  -8   0  -5  486.39   25.35
  -8   0  -5  420.88   18.34
  -8   0  -4   17.86    2.85
  -8   0  -4   16.33    1.28
  -8   0  -4   21.77    5.26
  -8   0  -4   12.78    2.82
  -8   0  -3  251.58    9.95
  -8   0  -3  243.52   13.32
  -8   0  -3  243.16   16.91
  -8   0  -3  254.99   12.11
  -8   0  -2  193.12    9.45
  -8   0  -2  184.92   14.56
  -8   0  -2  188.88   11.66
  -8   0  -2  190.89   10.37
  -8   0  -1  451.32   23.80
  -8   0  -1  435.53   19.46
  -8   0  -1  430.80   17.74
  -8   0  -1  442.28   17.34
  -8   0   0   37.51    4.53
  -8   0   0   41.13    6.77
  -8   0   0   32.68    4.18
  -8   0   0   34.23    4.86
  -8   0   1  263.01   13.60
  -8   0   1  281.85   15.31
  -8   0   1  247.04   13.16
  -8   0   1  290.36   18.31
  -8   0   2  113.64   11.27
  -8   0   2  107.91    9.26
  -8   0   2  103.91    8.39
  -8   0   2  106.21    8.29
  -8   0   3  247.81   17.21
  -8   0   3  245.18   13.66
  -8   0   3  256.71   14.27
  -8   0   4  629.69   29.70
  -8   0   4  610.14   25.19
  -8   0   5  233.09   16.80
  -8   0   6  188.31   15.19
  -8   0   7   75.58    9.45
  -8   0   8  356.92   22.48
  -8   1  -6    3.51    2.10
  -8   1  -6    5.88    1.81
  -8   1  -5  594.59   21.61
  -8   1  -5  594.56   22.10
  -8   1  -4  256.77   12.81
  -8   1  -4  284.40   18.58
  -8   1  -4  264.95    8.46
  -8   1  -4  294.82   14.00
  -8   1  -4  273.07    8.42
  -8   1  -3  711.89   21.49
  -8   1  -3  673.43   25.18
  -8   1  -3  670.36   24.37
  -8   1  -2  669.48   24.34
  -8   1  -2  682.12   31.08
  -8   1  -2  665.03   22.23
  -8   1  -2  683.33   25.37
  -8   1  -1   73.84    6.63
  -8   1  -1   76.26    7.08
  -8   1  -1   82.59    6.39
  -8   1  -1   89.65    9.82
  -8   1   0   83.59    7.61
  -8   1   0   87.44    6.95
  -8   1   0   85.83    7.23
  -8   1   0   87.52    9.88
  -8   1   1  233.14   13.97
  -8   1   1  245.06   13.00
  -8   1   1  225.92   12.86
  -8   1   2   59.58    6.22
  -8   1   2   65.27    6.53
  -8   1   2   62.05    8.63
  -8   1   2   48.57    6.33
  -8   1   3  145.16   13.18
  -8   1   3  134.91   10.11
  -8   1   4 1306.87   43.78
  -8   1   4 1387.28   50.31
  -8   1   5    1.10    1.49
  -8   1   6  119.29   12.42
  -8   1   7   28.09    6.14
  -8   1   8  197.75   16.73
  -8   1   8  188.93   13.99
  -8   2  -7  181.96   15.00
  -8   2  -6   20.78    5.26
  -8   2  -5    6.37    1.85
  -8   2  -5    7.19    1.98
  -8   2  -5    9.36    3.22
  -8   2  -4  173.61   10.69
  -8   2  -4  146.43    9.44
  -8   2  -4  178.15   14.48
  -8   2  -4  183.43    7.14
  -8   2  -4  173.22    7.24
  -8   2  -3  121.82    8.80
  -8   2  -3  114.27    6.74
  -8   2  -3  121.91   11.85
  -8   2  -3  139.56    7.02
  -8   2  -3  111.31    8.28
  -8   2  -2   80.33    7.12
  -8   2  -2   77.34    5.78
  -8   2  -2   82.50    6.09
  -8   2  -2   66.31    6.53
  -8   2  -2   77.48    9.40
  -8   2  -1  179.16   11.45
  -8   2  -1  186.13   14.89
  -8   2  -1  188.97   10.45
  -8   2  -1  186.67   11.54
  -8   2   0   83.62    9.78
  -8   2   0   80.12    7.44
  -8   2   0   91.76    8.10
  -8   2   0   89.93    7.34
  -8   2   1    7.02    2.28
  -8   2   1    4.57    2.98
  -8   2   2   70.32    9.19
  -8   2   2   61.33    6.62
  -8   2   3  189.97   12.50
  -8   2   3  197.92   15.99
  -8   2   4   35.91    6.84
  -8   2   5    0.90    1.52
  -8   2   6  191.58   16.40
  -8   2   6  192.28   14.18
  -8   2   7   11.04    3.60
  -8   2   7   14.04    5.10
  -8   3  -6  235.73   17.10
  -8   3  -5  191.15   12.15
  -8   3  -5  231.30   16.71
  -8   3  -4  122.27    9.43
  -8   3  -4  129.33    8.50
  -8   3  -4  123.53   11.95
  -8   3  -4  126.63    6.59
  -8   3  -3  155.94   10.06
  -8   3  -3  171.16    9.05
  -8   3  -3  185.41    9.17
  -8   3  -3  166.65   11.20
  -8   3  -2   73.97    5.87
  -8   3  -2   65.78    6.47
  -8   3  -2   70.29    5.99
  -8   3  -2   65.36    8.70
  -8   3  -1   88.48    7.84
  -8   3  -1  102.92   11.08
  -8   3  -1   89.36    6.97
  -8   3   0   44.89    5.80
  -8   3   0   47.96    7.60
  -8   3   1  337.79   21.12
  -8   3   1  302.53   16.64
  -8   3   2  382.09   23.43
  -8   3   3   92.21   11.11
  -8   3   4   35.60    6.91
  -8   3   4   23.89    5.00
  -8   3   5    3.87    3.62
  -8   3   5    4.03    2.15
  -8   3   6   15.82    5.31
  -8   3   6   19.49    5.03
  -8   4  -5   34.81    6.52
  -8   4  -4  142.69   13.27
  -8   4  -4  140.40    7.88
  -8   4  -3  187.08   15.25
  -8   4  -3  170.65    9.52
  -8   4  -3  168.54   10.58
  -8   4  -2   92.05    7.20
  -8   4  -2   96.24   10.86
  -8   4  -2   83.47    7.56
  -8   4  -1  245.44   18.12
  -8   4  -1  243.82   14.12
  -8   4  -1  256.89   13.32
  -8   4   0  240.10   17.98
  -8   4   0  238.14   13.19
  -8   4   0  208.15   13.53
  -8   4   1  393.60   18.48
  -8   4   1  372.37   23.69
  -8   4   2  487.39   21.83
  -8   4   2  483.09   27.52
  -8   4   3  374.13   24.64
  -8   4   3  442.33   22.82
  -8   4   3  404.67   20.22
  -8   4   4   16.70    4.43
  -8   4   4   16.33    5.51
  -8   5  -5    3.54    2.72
  -8   5  -4   59.75    8.62
  -8   5  -4   64.79    5.73
  -8   5  -3   25.01    5.91
  -8   5  -3   22.86    3.57
  -8   5  -2   41.66    4.98
  -8   5  -2   48.97    7.86
  -8   5  -2   46.81    5.74
  -8   5  -1  145.14   10.35
  -8   5  -1  158.30   14.67
  -8   5   0  139.61   13.94
  -8   5   0  121.79    9.76
  -8   5   1   80.87   10.59
  -8   5   1   77.27    7.87
  -8   5   2  467.20   24.12
  -8   5   2  423.19   26.73
  -8   5   2  432.44   21.26
  -7  -7   3   45.95    5.67
  -7  -7   3   47.65    6.48
  -7  -7   4    4.69    2.13
  -7  -7   4    9.93    3.07
  -7  -7   5   42.06    5.90
  -7  -7   5   49.76    6.23
  -7  -6  -1   39.59    6.64
  -7  -6  -1   33.79    5.83
  -7  -6   0  148.05   12.39
  -7  -6   0  163.12    9.23
  -7  -6   0  163.21   13.37
  -7  -6   1  522.87   24.72
  -7  -6   1  495.53   19.82
  -7  -6   2    2.84    2.19
  -7  -6   2    2.99    1.53
  -7  -6   3  246.11   15.16
  -7  -6   3  224.32   13.15
  -7  -6   4    0.42    1.09
  -7  -6   4    4.53    2.18
  -7  -6   5  110.61    9.32
  -7  -6   5  117.66    9.90
  -7  -6   6   27.18    4.36
  -7  -6   6   28.49    5.00
  -7  -6   7  216.40   12.91
  -7  -6   7  242.22   15.34
  -7  -6   8  419.11   21.96
  -7  -5  -3   11.84    3.55
  -7  -5  -3    8.21    3.70
  -7  -5  -2  124.22   11.60
  -7  -5  -2  137.80   11.67
  -7  -5  -2  132.86    9.10
  -7  -5  -1  483.49   23.50
  -7  -5  -1  479.98   16.93
  -7  -5  -1  455.22   19.69
  -7  -5  -1  484.95   24.29
  -7  -5   0   41.11    4.30
  -7  -5   0   32.16    3.63
  -7  -5   0   36.44    4.84
  -7  -5   1  409.53   20.99
  -7  -5   1  400.22   16.76
  -7  -5   1  364.00   17.86
  -7  -5   2  213.94   13.12
  -7  -5   2  228.94   12.44
  -7  -5   2  238.89   14.96
  -7  -5   3   29.52    4.71
  -7  -5   3   30.54    4.50
  -7  -5   3   29.16    4.91
  -7  -5   4  138.65   10.84
  -7  -5   4  158.60   10.87
  -7  -5   5  192.82   12.77
  -7  -5   5  213.85   13.17
  -7  -5   6  136.61   10.28
  -7  -5   6  144.52   10.98
  -7  -5   7  326.79   18.28
  -7  -5   7  377.08   17.84
  -7  -5   8  539.88   24.76
  -7  -5   8  500.70   21.53
  -7  -5   9  131.39   11.35
  -7  -5   9  112.94    8.86
  -7  -4  -5   82.23    8.59
  -7  -4  -4   13.15    3.46
  -7  -4  -4   13.34    3.85
  -7  -4  -3   22.55    5.11
  -7  -4  -3   20.84    3.08
  -7  -4  -3   24.80    4.62
  -7  -4  -2  295.68   10.75
  -7  -4  -2  321.98   19.05
  -7  -4  -2  306.78   13.91
  -7  -4  -2  299.16   17.00
  -7  -4  -2  293.68   11.21
  -7  -4  -1  571.89   18.82
  -7  -4  -1  585.52   19.48
  -7  -4  -1  577.14   26.62
  -7  -4  -1  551.12   21.31
  -7  -4   0  810.66   26.54
  -7  -4   0  894.64   33.90
  -7  -4   0  807.77   25.67
  -7  -4   0  839.51   28.70
  -7  -4   1 1230.29   42.38
  -7  -4   1 1218.60   36.62
  -7  -4   1 1155.33   35.25
  -7  -4   1 1181.56   38.02
  -7  -4   2  438.81   17.50
  -7  -4   2  420.01   20.86
  -7  -4   2  399.00   18.56
  -7  -4   3  144.00   11.14
  -7  -4   3  162.11   11.00
  -7  -4   4  509.72   22.43
  -7  -4   4  522.64   23.18
  -7  -4   5   16.25    3.74
  -7  -4   5   16.99    3.57
  -7  -4   6  224.04   13.86
  -7  -4   8  371.55   18.38
  -7  -4   9   24.52    4.35
  -7  -4  10   68.87    7.18
  -7  -3  -6   18.98    3.87
  -7  -3  -6   23.68    5.24
  -7  -3  -5  120.76   11.60
  -7  -3  -5  111.04    9.52
  -7  -3  -4    4.27    1.78
  -7  -3  -4    8.00    3.39
  -7  -3  -4    4.33    1.25
  -7  -3  -3    1.91    1.00
  -7  -3  -3    1.94    1.33
  -7  -3  -3    3.74    0.91
  -7  -3  -3    1.69    0.80
  -7  -3  -3    2.61    1.91
  -7  -3  -2  153.80    8.68
  -7  -3  -2  144.05   12.13
  -7  -3  -2  149.60    7.55
  -7  -3  -1    6.67    1.99
  -7  -3  -1    7.00    2.58
  -7  -3  -1    6.21    2.51
  -7  -3  -1    6.46    1.38
  -7  -3   0  232.57   14.18
  -7  -3   0  232.05   14.97
  -7  -3   0  245.68   12.26
  -7  -3   0  238.07   10.92
  -7  -3   1  268.07   13.49
  -7  -3   1  294.79   15.93
  -7  -3   1  256.29   15.81
  -7  -3   1  266.45   12.29
  -7  -3   2  108.66    9.69
  -7  -3   2  108.47    9.10
  -7  -3   2  116.52    7.79
  -7  -3   2  105.84    8.30
  -7  -3   3   16.63    3.54
  -7  -3   3   17.50    3.07
  -7  -3   3   17.32    3.80
  -7  -3   3   19.68    3.33
  -7  -3   4   80.56    7.89
  -7  -3   4   78.37    8.11
  -7  -3   4   76.30    7.84
  -7  -3   4   85.76    7.87
  -7  -3   4   77.33    6.87
  -7  -3   5  380.04   18.75
  -7  -3   5  384.89   19.39
  -7  -3   5  366.84   18.69
  -7  -3   6   48.86    6.30
  -7  -3   6   48.36    6.14
  -7  -3   7   68.61    7.63
  -7  -3   8  446.83   21.52
  -7  -3   9  153.67   11.76
  -7  -3  10  250.43   15.49
  -7  -2  -7  524.10   27.37
  -7  -2  -7  585.66   23.26
  -7  -2  -6    1.62    1.71
  -7  -2  -6    0.64    0.92
  -7  -2  -5  132.60   12.02
  -7  -2  -5  132.81    9.83
  -7  -2  -4   18.90    4.55
  -7  -2  -4   24.42    3.96
  -7  -2  -4   26.13    2.14
  -7  -2  -4   26.09    2.08
  -7  -2  -4   21.30    2.24
  -7  -2  -3  384.14   13.56
  -7  -2  -3  359.99   12.70
  -7  -2  -3  369.26   20.41
  -7  -2  -2   31.06    3.20
  -7  -2  -2   33.27    3.58
  -7  -2  -2   32.22    5.50
  -7  -2  -1  134.81    7.41
  -7  -2  -1  128.31    7.83
  -7  -2  -1  132.05   11.19
  -7  -2   0   11.18    2.12
  -7  -2   0    9.24    2.10
  -7  -2   0   12.55    3.44
  -7  -2   1  279.88   16.46
  -7  -2   1  266.17   13.26
  -7  -2   1  287.90   12.92
  -7  -2   2    8.90    2.26
  -7  -2   2    8.63    2.53
  -7  -2   2    4.40    2.33
  -7  -2   2    5.10    1.65
  -7  -2   3  312.97   15.54
  -7  -2   3  304.95   17.45
  -7  -2   3  318.84   14.65
  -7  -2   3  335.70   16.85
  -7  -2   4   19.39    3.30
  -7  -2   4   24.50    4.26
  -7  -2   4   21.43    4.27
  -7  -2   4   22.98    3.83
  -7  -2   5  114.79    9.45
  -7  -2   5  123.07   10.55
  -7  -2   5  122.00    9.92
  -7  -2   5  113.63    8.68
  -7  -2   6  338.80   16.95
  -7  -2   6  386.34   19.01
  -7  -2   6  388.65   20.06
  -7  -2   7  121.17   10.63
  -7  -2   8    0.99    1.15
  -7  -2   9   39.30    6.14
  -7  -2  10  481.84   24.00
  -7  -1  -7  150.18   13.18
  -7  -1  -6  211.72   15.43
  -7  -1  -6  225.60   12.31
  -7  -1  -5   18.11    4.18
  -7  -1  -5   18.21    1.84
  -7  -1  -5   18.00    3.22
  -7  -1  -4  149.33    5.70
  -7  -1  -4  148.14   12.32
  -7  -1  -4  150.85    7.14
  -7  -1  -3 1819.26   47.80
  -7  -1  -3 1919.97   49.15
  -7  -1  -3 1856.52   59.44
  -7  -1  -2  284.26   11.72
  -7  -1  -2  275.48   11.40
  -7  -1  -2  268.66   16.64
  -7  -1  -1 1083.55   32.82
  -7  -1  -1 1113.64   40.28
  -7  -1  -1 1173.76   36.51
  -7  -1   0   79.09    7.15
  -7  -1   0   84.38    6.15
  -7  -1   0   80.51    6.27
  -7  -1   0   83.53    8.75
  -7  -1   1  906.88   31.64
  -7  -1   1  901.66   34.71
  -7  -1   1  945.16   29.54
  -7  -1   1  912.07   29.82
  -7  -1   2 1268.10   42.91
  -7  -1   2 1140.96   36.04
  -7  -1   2 1201.76   38.90
  -7  -1   2 1191.99   37.13
  -7  -1   3  444.30   18.90
  -7  -1   3  433.79   19.80
  -7  -1   3  449.63   22.20
  -7  -1   3  440.31   18.23
  -7  -1   4  414.03   19.29
  -7  -1   4  401.28   17.65
  -7  -1   4  391.20   18.18
  -7  -1   4  417.25   21.26
  -7  -1   5    2.54    1.78
  -7  -1   5    0.70    1.06
  -7  -1   5    1.61    1.05
  -7  -1   5    1.76    1.00
  -7  -1   6  534.68   23.04
  -7  -1   6  507.80   24.65
  -7  -1   7    3.09    2.32
  -7  -1   8  129.70   11.69
  -7  -1   9   12.77    3.92
  -7  -1  10   40.67    6.85
  -7   0  -8  122.30   11.83
  -7   0  -7  102.81   10.65
  -7   0  -7  114.26    7.52
  -7   0  -6    6.89    1.31
  -7   0  -6    7.91    3.09
  -7   0  -6    5.50    1.75
  -7   0  -6    4.66    1.53
  -7   0  -5   22.73    3.40
  -7   0  -5   22.36    4.85
  -7   0  -5   21.69    2.61
  -7   0  -4  136.38   11.46
  -7   0  -4  137.53    8.72
  -7   0  -4  129.74    4.67
  -7   0  -4  132.81    7.35
  -7   0  -3  132.42    6.33
  -7   0  -3  127.31    7.39
  -7   0  -3  122.40    8.32
  -7   0  -3  132.76   11.30
  -7   0  -2   23.38    4.69
  -7   0  -2   27.82    3.04
  -7   0  -2   30.02    4.01
  -7   0  -2   27.15    3.38
  -7   0  -1  567.34   20.09
  -7   0  -1  558.44   25.69
  -7   0  -1  573.88   21.80
  -7   0  -1  565.46   19.50
  -7   0   0  340.33   14.33
  -7   0   0  319.87   15.49
  -7   0   0  356.89   19.31
  -7   0   1   25.55    3.86
  -7   0   1   21.73    4.56
  -7   0   1   24.59    3.51
  -7   0   1   25.78    3.55
  -7   0   2 1357.61   42.34
  -7   0   2 1412.00   41.15
  -7   0   2 1287.65   45.72
  -7   0   2 1295.90   40.05
  -7   0   3 1176.60   35.88
  -7   0   3 1063.45   35.49
  -7   0   3 1100.49   36.88
  -7   0   3 1081.01   40.23
  -7   0   4  112.94    8.47
  -7   0   4   98.16    8.15
  -7   0   4  113.45    9.13
  -7   0   4  101.57   10.07
  -7   0   5 1078.18   40.33
  -7   0   5 1029.71   36.10
  -7   0   5 1141.66   37.82
  -7   0   5 1038.91   35.32
  -7   0   6  303.00   16.58
  -7   0   6  322.96   19.20
  -7   0   7   15.68    4.10
  -7   0   7    9.98    2.82
  -7   0   8  274.08   18.00
  -7   0   8  236.59   14.45
  -7   0   9    0.10    2.10
  -7   0   9    6.54    2.23
  -7   0  10  305.09   20.31
  -7   0  10  301.37   17.21
  -7   1  -8  119.66   11.40
  -7   1  -7   34.31    3.49
  -7   1  -7   42.92    6.65
  -7   1  -6  387.21   15.26
  -7   1  -6  396.04   15.16
  -7   1  -6  396.52   15.05
  -7   1  -6  430.09   22.25
  -7   1  -5  173.42   13.34
  -7   1  -5  175.52    9.27
  -7   1  -5  191.31    9.72
  -7   1  -4  239.30    7.69
  -7   1  -4  231.76   11.52
  -7   1  -4  241.65    7.60
  -7   1  -4  242.11   11.42
  -7   1  -4  254.04   16.31
  -7   1  -3  245.90   15.87
  -7   1  -3  238.02   11.42
  -7   1  -3  235.92    9.42
  -7   1  -3  223.06   11.53
  -7   1  -2   36.94    4.11
  -7   1  -2   39.78    3.65
  -7   1  -2   33.62    5.54
  -7   1  -2   42.84    4.68
  -7   1  -1  127.88   11.15
  -7   1  -1  126.20    7.50
  -7   1  -1  120.52    8.48
  -7   1  -1  141.84    8.61
  -7   1   0  227.37   11.54
  -7   1   0  199.16   11.61
  -7   1   0  211.86   10.74
  -7   1   0  200.23   14.36
  -7   1   1   26.85    4.12
  -7   1   1   25.29    3.52
  -7   1   1   29.48    3.94
  -7   1   1   26.77    4.96
  -7   1   2   92.53    7.85
  -7   1   2   76.52    6.73
  -7   1   2   80.38    6.76
  -7   1   2   71.46    8.39
  -7   1   3  617.81   25.25
  -7   1   3  646.43   29.11
  -7   1   3  700.75   25.44
  -7   1   3  654.53   24.35
  -7   1   4    8.73    2.54
  -7   1   4    9.70    2.66
  -7   1   4   13.92    3.16
  -7   1   4    7.55    2.87
  -7   1   5   85.15    9.29
  -7   1   5   72.92    7.39
  -7   1   5   63.11    7.17
  -7   1   5   80.90    7.79
  -7   1   6   41.06    5.75
  -7   1   6   39.21    6.71
  -7   1   7   25.30    5.35
  -7   1   7   29.55    4.90
  -7   1   8  194.59   13.56
  -7   1   8  199.01   16.17
  -7   1   9   83.08    8.68
  -7   1   9   94.75   10.98
  -7   2  -8   24.71    5.27
  -7   2  -7  209.46   14.83
  -7   2  -7  186.17    7.89
  -7   2  -7  179.56    9.85
  -7   2  -6   48.95    6.94
  -7   2  -6   43.35    3.83
  -7   2  -6   51.11    5.07
  -7   2  -5  276.49   11.86
  -7   2  -5  285.06   17.51
  -7   2  -5  277.54   13.11
  -7   2  -4  884.97   23.69
  -7   2  -4  870.14   23.80
  -7   2  -4  847.62   27.35
  -7   2  -4  897.24   35.11
  -7   2  -4  858.36   28.63
  -7   2  -3   69.11    6.02
  -7   2  -3   66.36    4.65
  -7   2  -3   77.97    8.66
  -7   2  -3   69.39    5.81
  -7   2  -3   66.05    4.49
  -7   2  -2   79.39    8.90
  -7   2  -2   91.48    6.99
  -7   2  -2   82.70    6.76
  -7   2  -2   89.43    6.02
  -7   2  -1 1117.54   34.80
  -7   2  -1 1083.37   40.49
  -7   2  -1 1149.62   33.29
  -7   2   0   21.59    4.64
  -7   2   0   21.14    3.68
  -7   2   0   29.17    4.05
  -7   2   1   38.46    6.10
  -7   2   1   36.15    4.52
  -7   2   1   40.56    4.97
  -7   2   2  122.47    9.30
  -7   2   2  123.30    8.85
  -7   2   2  127.56   11.65
  -7   2   3  784.84   29.37
  -7   2   3  785.63   33.49
  -7   2   3  763.19   28.02
  -7   2   4   98.01   10.59
  -7   2   4   83.91    8.15
  -7   2   4   94.82    8.71
  -7   2   5  188.04   15.01
  -7   2   5  164.70   12.16
  -7   2   6  214.58   16.65
  -7   2   6  217.91   14.44
  -7   2   7   87.14    9.02
  -7   2   7   93.88   11.10
  -7   2   8  201.22   16.90
  -7   2   8  211.16   14.71
  -7   2   9  114.72   12.89
  -7   2   9  121.08   11.19
  -7   3  -8   89.79    9.64
  -7   3  -7  133.07   11.77
  -7   3  -7  142.66    9.41
  -7   3  -6   39.56    6.33
  -7   3  -6   42.16    4.97
  -7   3  -6   32.66    3.06
  -7   3  -5  833.23   34.40
  -7   3  -5  861.28   22.54
  -7   3  -5  846.84   22.50
  -7   3  -5  838.75   25.94
  -7   3  -5  867.16   29.56
  -7   3  -4  630.79   24.01
  -7   3  -4  650.45   19.63
  -7   3  -4  623.20   21.55
  -7   3  -4  645.80   28.74
  -7   3  -4  633.78   19.67
  -7   3  -3  180.07   10.99
  -7   3  -3  182.70   10.09
  -7   3  -3  166.05   13.33
  -7   3  -3  186.26    8.88
  -7   3  -2   18.48    2.83
  -7   3  -2   19.88    3.20
  -7   3  -2   24.78    3.87
  -7   3  -2   21.25    4.53
  -7   3  -1  124.33    7.81
  -7   3  -1  102.45    7.91
  -7   3  -1  104.63    8.33
  -7   3  -1  108.87   10.69
  -7   3   0  649.43   29.87
  -7   3   0  653.73   25.22
  -7   3   0  715.19   25.92
  -7   3   1  780.34   28.08
  -7   3   1  713.11   27.04
  -7   3   1  706.04   31.98
  -7   3   2  678.27   26.37
  -7   3   2  612.16   24.92
  -7   3   2  652.90   27.00
  -7   3   2  713.83   31.49
  -7   3   3   82.62    8.19
  -7   3   3   59.29    6.86
  -7   3   3   64.77    8.59
  -7   3   4  324.72   17.88
  -7   3   4  295.52   20.07
  -7   3   5  243.63   18.28
  -7   3   5  246.63   15.67
  -7   3   6    2.35    1.67
  -7   3   6    0.38    1.63
  -7   3   7   88.35   11.29
  -7   3   7  104.49   10.29
  -7   3   8  112.64   11.05
  -7   3   8  109.63   12.78
  -7   4  -8  291.31   18.36
  -7   4  -7   19.05    3.88
  -7   4  -7   26.55    5.18
  -7   4  -6   89.51    4.00
  -7   4  -6   87.81    5.09
  -7   4  -6  108.63   10.49
  -7   4  -6   97.93    8.26
  -7   4  -5  247.74   10.00
  -7   4  -5  256.41   14.27
  -7   4  -5  251.96   16.67
  -7   4  -5  237.21   10.68
  -7   4  -4  289.96   12.96
  -7   4  -4  302.12   12.32
  -7   4  -4  272.40   15.05
  -7   4  -3  442.98   20.57
  -7   4  -3  501.35   18.15
  -7   4  -3  500.25   19.18
  -7   4  -3  491.75   24.78
  -7   4  -2  111.77   10.97
  -7   4  -2  112.78    8.99
  -7   4  -2  100.96    7.83
  -7   4  -2  119.50    7.90
  -7   4  -1   11.00    3.51
  -7   4  -1    4.67    1.66
  -7   4  -1    6.55    2.41
  -7   4  -1    7.33    2.65
  -7   4   0   48.62    5.30
  -7   4   0   32.61    6.05
  -7   4   0   40.37    5.30
  -7   4   1   94.43    8.37
  -7   4   1   84.24    7.52
  -7   4   1   97.12   10.72
  -7   4   1   98.72    9.15
  -7   4   2  286.13   15.27
  -7   4   2  284.98   16.13
  -7   4   2  279.91   19.25
  -7   4   2  294.48   17.04
  -7   4   3  187.08   12.26
  -7   4   3  169.27   14.90
  -7   4   4  107.72   10.20
  -7   4   4  111.51   12.40
  -7   4   5  218.79   17.83
  -7   4   5  222.58   15.56
  -7   4   6  108.72   12.83
  -7   4   6  120.40   11.30
  -7   5  -6   25.91    2.94
  -7   5  -6   27.07    5.30
  -7   5  -5   37.39    3.84
  -7   5  -5   39.27    6.54
  -7   5  -5   41.10    4.19
  -7   5  -4  150.05   12.90
  -7   5  -4  157.73    9.03
  -7   5  -4  141.15    8.79
  -7   5  -3   26.47    3.70
  -7   5  -3   22.87    3.51
  -7   5  -3   26.99    5.63
  -7   5  -2    5.62    2.07
  -7   5  -2    6.61    1.95
  -7   5  -2    2.43    1.23
  -7   5  -1   51.21    7.93
  -7   5  -1   58.39    6.00
  -7   5  -1   50.93    5.91
  -7   5   0    6.54    2.25
  -7   5   0   15.12    3.22
  -7   5   0    9.94    3.32
  -7   5   0   10.66    3.01
  -7   5   1  450.81   25.44
  -7   5   1  419.96   21.69
  -7   5   1  444.23   20.18
  -7   5   2   20.60    3.98
  -7   5   2   22.87    4.74
  -7   5   2   13.76    4.48
  -7   5   3  114.20   12.97
  -7   5   3  108.77    9.65
  -7   5   3  107.30   10.66
  -7   5   4  132.59   12.07
  -7   5   4  132.44   14.00
  -7   5   4  146.62   11.57
  -7   5   5  247.52   16.16
  -7   5   5  249.11   19.93
  -7   5   5  269.41   17.81
  -7   6  -6   58.56    7.95
  -7   6  -5    6.55    1.75
  -7   6  -5   11.01    3.95
  -7   6  -4   51.20    7.54
  -7   6  -4   37.99    4.80
  -7   6  -3  774.81   28.40
  -7   6  -3  826.79   35.78
  -7   6  -3  846.89   29.33
  -7   6  -2   42.75    7.44
  -7   6  -2   41.23    5.27
  -7   6  -2   39.42    5.23
  -7   6  -1   17.61    3.44
  -7   6  -1   13.87    3.97
  -7   6  -1   14.40    3.32
  -7   6   0    5.58    2.06
  -7   6   0    7.21    2.64
  -7   6   0    3.90    2.30
  -7   6   1  219.72   17.83
  -7   6   1  218.22   15.39
  -7   6   1  204.13   13.70
  -7   6   2   19.90    4.15
  -7   6   2   21.85    6.02
  -7   6   2   21.02    4.90
  -7   6   3    5.43    3.09
  -7   6   3    5.20    2.22
  -7   6   3    3.75    2.81
  -7   7  -3  583.99   24.72
  -7   7  -3  606.58   30.47
  -7   7  -2   83.14   10.48
  -7   7  -2  102.01    9.08
  -7   7  -1  584.64   25.59
  -7   7  -1  575.65   27.19
  -7   7  -1  595.46   31.26
  -6  -8   4   32.88    4.83
  -6  -8   4   31.62    5.18
  -6  -7  -1    3.56    1.86
  -6  -7  -1   -0.49    1.86
  -6  -7   0   22.07    3.28
  -6  -7   0   26.02    4.95
  -6  -7   0   14.49    4.05
  -6  -7   1  112.70   11.15
  -6  -7   1  120.46   10.49
  -6  -7   1  137.62    8.94
  -6  -7   2  121.89    9.01
  -6  -7   2  121.38   10.11
  -6  -7   2  128.16   11.66
  -6  -7   3   87.17    8.33
  -6  -7   3   85.27    7.73
  -6  -7   3  102.91   10.32
  -6  -7   4   63.57    6.80
  -6  -7   4   56.49    6.22
  -6  -7   5  301.51   15.06
  -6  -7   5  269.82   15.78
  -6  -7   6    0.93    1.04
  -6  -7   6    1.13    1.08
  -6  -7   7  286.89   17.08
  -6  -7   7  298.63   13.55
  -6  -7   8  207.32   14.52
  -6  -6  -3  151.59   12.48
  -6  -6  -3  146.62    9.95
  -6  -6  -3  161.34   13.32
  -6  -6  -2    7.10    2.81
  -6  -6  -2    8.63    3.04
  -6  -6  -2    5.75    1.92
  -6  -6  -1    2.64    1.20
  -6  -6  -1    2.27    1.58
  -6  -6  -1    3.65    2.28
  -6  -6  -1    4.33    2.43
  -6  -6   0  300.84   17.31
  -6  -6   0  278.05   17.20
  -6  -6   0  286.44   12.79
  -6  -6   0  284.23   15.11
  -6  -6   1  427.40   21.89
  -6  -6   1  401.25   19.26
  -6  -6   1  448.94   17.73
  -6  -6   1  443.35   21.10
  -6  -6   2    0.32    0.97
  -6  -6   2   -0.29    0.99
  -6  -6   2   -0.32    0.87
  -6  -6   3  153.05   10.66
  -6  -6   3  142.64   10.66
  -6  -6   3  146.39    9.81
  -6  -6   4  308.32   15.80
  -6  -6   4  335.89   16.36
  -6  -6   5    0.97    1.14
  -6  -6   5    0.69    0.95
  -6  -6   6  390.69   17.20
  -6  -6   6  390.01   19.22
  -6  -6   7   51.39    5.30
  -6  -6   7   59.42    6.95
  -6  -6   8    7.37    2.87
  -6  -6   8    7.84    1.80
  -6  -6   9   18.25    4.23
  -6  -6  10  325.93   19.35
  -6  -5  -5  680.99   29.30
  -6  -5  -5  748.14   32.80
  -6  -5  -4  224.59   11.52
  -6  -5  -4  213.81   14.56
  -6  -5  -3  184.43   10.46
  -6  -5  -3  187.13   13.94
  -6  -5  -3  173.89   12.84
  -6  -5  -2  940.59   35.37
  -6  -5  -2  927.90   35.98
  -6  -5  -2  937.82   25.53
  -6  -5  -2  958.33   26.06
  -6  -5  -2  914.37   30.65
  -6  -5  -1   10.63    2.76
  -6  -5  -1   14.17    2.27
  -6  -5  -1   24.93    4.58
  -6  -5  -1   20.76    3.43
  -6  -5   0    2.18    0.97
  -6  -5   0    2.36    1.72
  -6  -5   0    0.68    0.74
  -6  -5   1  447.57   20.79
  -6  -5   1  409.29   18.36
  -6  -5   1  393.65   20.20
  -6  -5   1  439.12   17.07
  -6  -5   2  401.68   17.98
  -6  -5   2  362.57   15.97
  -6  -5   2  352.34   18.79
  -6  -5   2  386.07   18.67
  -6  -5   3  554.09   21.76
  -6  -5   3  568.95   23.18
  -6  -5   3  571.75   23.43
  -6  -5   3  594.68   25.27
  -6  -5   4  555.51   23.41
  -6  -5   4  550.06   22.23
  -6  -5   4  538.27   24.49
  -6  -5   4  616.44   23.53
  -6  -5   5  145.92   10.26
  -6  -5   5  140.87   10.69
  -6  -5   5  153.25   11.55
  -6  -5   5  140.96    9.62
  -6  -5   6  201.00   11.48
  -6  -5   6  180.30   11.98
  -6  -5   7   44.13    5.77
  -6  -5   7   46.32    5.01
  -6  -5   8    3.31    2.08
  -6  -5   8    2.35    1.24
  -6  -5   9    8.79    2.14
  -6  -5   9    6.49    2.66
  -6  -5  10    7.65    2.78
  -6  -5  11  129.67   11.64
  -6  -4  -6  340.60   18.06
  -6  -4  -6  327.71   20.30
  -6  -4  -5  318.16   19.09
  -6  -4  -5  326.97   17.35
  -6  -4  -5  289.73   15.91
  -6  -4  -4   52.10    6.14
  -6  -4  -4   54.10    7.25
  -6  -4  -4   47.95    6.06
  -6  -4  -4   64.06    5.09
  -6  -4  -3  167.02    5.12
  -6  -4  -3  161.10   11.15
  -6  -4  -3  175.88   11.96
  -6  -4  -3  182.69    9.39
  -6  -4  -3  150.54    5.08
  -6  -4  -3  171.12   12.91
  -6  -4  -2   17.29    3.91
  -6  -4  -2   28.36    4.64
  -6  -4  -2   22.94    2.36
  -6  -4  -2   23.15    2.29
  -6  -4  -2   21.13    3.97
  -6  -4  -2   23.66    3.22
  -6  -4  -1  656.91   20.82
  -6  -4  -1  665.83   23.30
  -6  -4  -1  642.11   27.26
  -6  -4  -1  725.65   27.38
  -6  -4  -1  660.76   20.34
  -6  -4   0   75.36    7.65
  -6  -4   0   80.03    5.67
  -6  -4   0   81.02    7.69
  -6  -4   0   81.95    6.59
  -6  -4   1   13.82    3.09
  -6  -4   1   16.74    3.55
  -6  -4   1   17.87    3.10
  -6  -4   1   17.25    2.69
  -6  -4   2  123.14    8.66
  -6  -4   2  116.42    9.33
  -6  -4   2  117.86    9.49
  -6  -4   3  178.29   10.98
  -6  -4   3  171.18   11.23
  -6  -4   3  151.62   11.00
  -6  -4   4  643.01   25.11
  -6  -4   4  657.30   25.34
  -6  -4   4  696.72   26.76
  -6  -4   5  100.80    8.72
  -6  -4   5  101.34    8.12
  -6  -4   5  101.50    8.60
  -6  -4   6   25.15    4.28
  -6  -4   6   24.53    4.27
  -6  -4   6   25.42    4.29
  -6  -4   6   25.47    3.95
  -6  -4   7  686.07   27.53
  -6  -4   7  691.42   25.39
  -6  -4   7  691.48   28.03
  -6  -4   7  649.96   26.31
  -6  -4   8   -0.31    0.98
  -6  -4   8   -0.47    1.26
  -6  -4   9   36.45    4.73
  -6  -4   9   31.88    4.77
  -6  -4  10  218.22   13.44
  -6  -4  10  250.12   13.03
  -6  -3  -7   12.11    2.96
  -6  -3  -7   12.35    4.12
  -6  -3  -6   19.15    4.52
  -6  -3  -6   20.92    3.77
  -6  -3  -5  249.06   16.29
  -6  -3  -5  272.85   14.66
  -6  -3  -4  487.60   16.26
  -6  -3  -4  463.23   20.49
  -6  -3  -4  489.88   23.51
  -6  -3  -4  481.30   20.92
  -6  -3  -3  254.48   10.86
  -6  -3  -3  252.90    8.52
  -6  -3  -3  248.00   13.83
  -6  -3  -3  255.14    8.31
  -6  -3  -3  254.31   13.97
  -6  -3  -3  257.35   15.84
  -6  -3  -2  128.67   10.52
  -6  -3  -2  131.49    6.42
  -6  -3  -2  125.21    7.38
  -6  -3  -2  133.36    9.71
  -6  -3  -2  127.10    6.03
  -6  -3  -1  559.06   17.78
  -6  -3  -1  592.57   23.18
  -6  -3  -1  514.41   23.49
  -6  -3  -1  546.44   19.52
  -6  -3   0   10.64    3.21
  -6  -3   0   13.64    3.10
  -6  -3   0   10.63    1.80
  -6  -3   0   10.12    2.08
  -6  -3   1  690.90   22.37
  -6  -3   1  690.35   23.88
  -6  -3   1  659.17   26.46
  -6  -3   1  683.00   26.09
  -6  -3   2  212.52   12.79
  -6  -3   2  197.40   12.11
  -6  -3   2  192.53   10.89
  -6  -3   3  333.94   16.79
  -6  -3   3  338.55   16.77
  -6  -3   3  378.53   16.62
  -6  -3   4  211.53   12.40
  -6  -3   4  198.42   12.23
  -6  -3   4  200.70   12.03
  -6  -3   5  810.16   29.39
  -6  -3   5  794.31   29.48
  -6  -3   5  844.51   29.83
  -6  -3   5  792.21   28.99
  -6  -3   6  177.84   11.47
  -6  -3   6  186.49   12.16
  -6  -3   6  185.06   11.99
  -6  -3   6  181.04   11.44
  -6  -3   7   56.52    6.07
  -6  -3   7   49.48    5.90
  -6  -3   7   54.61    6.25
  -6  -3   7   50.40    6.24
  -6  -3   8  834.31   32.03
  -6  -3   8  897.49   31.03
  -6  -3   8  880.55   31.29
  -6  -3   9  222.15   13.25
  -6  -3  10  288.67   15.51
  -6  -3  11   16.66    3.61
  -6  -2  -8   82.35    9.43
  -6  -2  -8   79.46    7.10
  -6  -2  -7  180.63   10.92
  -6  -2  -7  159.23   13.06
  -6  -2  -6   25.89    4.84
  -6  -2  -6   27.07    4.02
  -6  -2  -5  330.91   15.80
  -6  -2  -5  360.92   19.63
  -6  -2  -4  511.41   15.74
  -6  -2  -4  515.01   13.85
  -6  -2  -4  518.97   13.82
  -6  -2  -4  530.69   20.92
  -6  -2  -4  478.35   23.24
  -6  -2  -3    0.68    0.92
  -6  -2  -3    3.41    0.96
  -6  -2  -3    3.86    0.95
  -6  -2  -2  339.71   17.75
  -6  -2  -2  331.53   12.74
  -6  -2  -2  363.06   16.41
  -6  -2  -2  326.76   11.75
  -6  -2  -1  400.14   19.27
  -6  -2  -1  390.15   17.60
  -6  -2  -1  378.21   14.59
  -6  -2  -1  405.52   14.09
  -6  -2   0   59.24    6.01
  -6  -2   0   55.55    6.37
  -6  -2   0   60.60    4.65
  -6  -2   0   60.52    5.03
  -6  -2   1  275.03   11.93
  -6  -2   1  294.13   14.63
  -6  -2   1  300.80   13.34
  -6  -2   2  179.89    9.55
  -6  -2   2  213.96   11.83
  -6  -2   2  194.69   12.38
  -6  -2   2  180.06   10.27
  -6  -2   3  434.03   17.19
  -6  -2   3  439.66   18.95
  -6  -2   3  459.71   18.49
  -6  -2   3  433.16   18.82
  -6  -2   3  453.38   20.29
  -6  -2   4  424.86   17.32
  -6  -2   4  415.71   19.53
  -6  -2   4  404.44   17.86
  -6  -2   4  449.39   19.18
  -6  -2   4  415.41   18.28
  -6  -2   5 1541.39   47.67
  -6  -2   5 1575.88   48.82
  -6  -2   5 1656.95   47.46
  -6  -2   5 1505.89   47.08
  -6  -2   6  365.05   17.63
  -6  -2   6  394.27   18.24
  -6  -2   6  354.80   17.95
  -6  -2   7   46.09    5.86
  -6  -2   7   52.75    6.10
  -6  -2   7   39.44    5.28
  -6  -2   8  388.07   18.85
  -6  -2   8  347.70   18.24
  -6  -2   8  335.35   17.73
  -6  -2   9    1.52    1.46
  -6  -2  10  280.32   16.47
  -6  -2  11  137.77   11.26
  -6  -1  -9  121.94   11.47
  -6  -1  -9   99.48    7.14
  -6  -1  -8  120.16    7.96
  -6  -1  -8  123.81   11.29
  -6  -1  -7  117.90    7.90
  -6  -1  -7  131.68   11.26
  -6  -1  -6  485.05   23.78
  -6  -1  -6  519.95   19.56
  -6  -1  -5  146.19    9.01
  -6  -1  -5  143.56    5.28
  -6  -1  -5  143.48   11.45
  -6  -1  -4 2382.61   59.29
  -6  -1  -4 2432.29   70.62
  -6  -1  -4 2407.00   57.89
  -6  -1  -3   92.70    5.20
  -6  -1  -3   90.02    4.93
  -6  -1  -3   90.39    8.50
  -6  -1  -2   19.74    3.88
  -6  -1  -2   17.90    2.20
  -6  -1  -2   19.02    2.34
  -6  -1  -1  642.76   20.39
  -6  -1  -1  607.15   19.84
  -6  -1   0  131.17    9.98
  -6  -1   0  111.36    6.75
  -6  -1   0  126.36    7.35
  -6  -1   1  335.45   13.67
  -6  -1   1  348.51   15.51
  -6  -1   1  344.61   14.19
  -6  -1   1  334.32   17.20
  -6  -1   2    9.33    2.07
  -6  -1   2    7.79    2.34
  -6  -1   2   15.37    2.53
  -6  -1   2   11.75    2.44
  -6  -1   3  145.79    9.54
  -6  -1   3  138.28   10.47
  -6  -1   3  137.83    8.80
  -6  -1   3  131.96    8.27
  -6  -1   4   23.67    3.66
  -6  -1   4   23.21    4.20
  -6  -1   4   20.12    3.45
  -6  -1   4   15.77    2.80
  -6  -1   5  558.26   20.65
  -6  -1   5  554.08   21.41
  -6  -1   5  531.72   23.11
  -6  -1   6   15.73    3.07
  -6  -1   6   18.56    3.98
  -6  -1   6   18.01    3.43
  -6  -1   6   11.81    2.83
  -6  -1   7  175.39   12.34
  -6  -1   7  156.25   10.98
  -6  -1   7  177.92   11.64
  -6  -1   8  125.68    9.15
  -6  -1   8  132.20   10.47
  -6  -1   8  143.68   11.44
  -6  -1   8  151.15   11.07
  -6  -1   9  346.10   16.62
  -6  -1   9  360.39   19.59
  -6  -1  10    5.34    2.32
  -6  -1  10    5.13    2.86
  -6  -1  11    1.04    0.99
  -6  -1  11    3.22    2.26
  -6   0  -9   33.97    5.79
  -6   0  -8  578.93   19.21
  -6   0  -8  547.49   26.00
  -6   0  -7  136.92   11.51
  -6   0  -7  144.11    7.94
  -6   0  -6   32.96    5.35
  -6   0  -6   34.65    3.82
  -6   0  -6   36.82    2.76
  -6   0  -5    7.89    1.35
  -6   0  -5    9.24    2.94
  -6   0  -4  625.96   16.00
  -6   0  -4  652.87   26.76
  -6   0  -4  636.30   19.65
  -6   0  -3   59.27    5.12
  -6   0  -3   63.88    4.56
  -6   0  -3   58.25    3.61
  -6   0  -3   61.56    6.97
  -6   0  -2  451.04   15.82
  -6   0  -2  421.86   16.81
  -6   0  -2  461.81   21.16
  -6   0  -2  455.62   14.97
  -6   0  -1 1873.17   50.57
  -6   0  -1 1990.57   53.05
  -6   0  -1 1955.42   50.25
  -6   0   0   22.58    4.03
  -6   0   0   23.95    3.34
  -6   0   0   24.16    2.93
  -6   0   0   22.02    2.88
  -6   0   1 1160.72   34.54
  -6   0   1 1244.72   35.01
  -6   0   1 1217.50   40.29
  -6   0   2  586.26   22.14
  -6   0   2  603.80   21.41
  -6   0   2  574.11   20.85
  -6   0   2  643.01   25.83
  -6   0   3    1.80    1.49
  -6   0   3    0.65    1.05
  -6   0   3    2.30    1.02
  -6   0   3    1.49    1.05
  -6   0   4  105.42    9.63
  -6   0   4  100.06    7.71
  -6   0   4  108.09    8.30
  -6   0   4  100.23    7.42
  -6   0   5 2068.81   57.53
  -6   0   5 2030.54   58.35
  -6   0   5 2004.35   57.82
  -6   0   5 1973.51   56.66
  -6   0   5 2004.77   61.40
  -6   0   6  123.18    9.43
  -6   0   6  142.08   10.13
  -6   0   6  135.66    9.39
  -6   0   6  150.35   11.71
  -6   0   7  193.29   13.73
  -6   0   7  199.89   12.00
  -6   0   7  183.03   12.30
  -6   0   7  169.48   11.74
  -6   0   7  197.68   11.84
  -6   0   8  288.59   17.67
  -6   0   8  270.10   14.84
  -6   0   9   42.69    5.61
  -6   0   9   37.43    6.11
  -6   0  10  305.78   16.62
  -6   0  10  313.89   19.59
  -6   0  11   91.12   10.42
  -6   0  11  105.55    9.25
  -6   1 -10   79.13    8.93
  -6   1  -9    6.00    2.48
  -6   1  -8    2.96    1.01
  -6   1  -8    2.22    0.82
  -6   1  -8    2.57    1.61
  -6   1  -8    1.63    0.66
  -6   1  -7  162.28    7.57
  -6   1  -7  169.93    7.77
  -6   1  -7  162.38   12.39
  -6   1  -7  170.71    7.73
  -6   1  -6  139.64    7.34
  -6   1  -6  143.07    7.50
  -6   1  -6  156.13    7.53
  -6   1  -5   95.88    6.05
  -6   1  -5  106.28    6.51
  -6   1  -5   96.33    8.93
  -6   1  -4  260.02   15.35
  -6   1  -4  258.81    7.52
  -6   1  -4  263.33   11.25
  -6   1  -4  254.03    7.60
  -6   1  -4  248.71   10.97
  -6   1  -3   46.56    4.22
  -6   1  -3   40.98    5.70
  -6   1  -3   50.72    3.41
  -6   1  -3   51.09    4.51
  -6   1  -2  122.94   10.13
  -6   1  -2  152.51    8.50
  -6   1  -2  139.21    7.86
  -6   1  -2  148.25    7.05
  -6   1  -1  128.43    8.06
  -6   1  -1  146.13    8.19
  -6   1  -1  149.77    7.61
  -6   1  -1  133.37   10.52
  -6   1   0 1262.76   43.10
  -6   1   0 1334.64   38.82
  -6   1   0 1305.73   37.14
  -6   1   0 1291.02   37.66
  -6   1   1  435.97   20.51
  -6   1   1  384.77   16.59
  -6   1   1  412.99   16.20
  -6   1   2  416.02   20.44
  -6   1   2  455.28   18.29
  -6   1   2  402.01   16.62
  -6   1   3  481.10   23.13
  -6   1   3  519.68   21.04
  -6   1   3  531.14   21.18
  -6   1   3  555.37   20.41
  -6   1   4   30.41    4.31
  -6   1   4   26.84    4.94
  -6   1   4   28.66    3.97
  -6   1   4   30.10    4.36
  -6   1   5  501.55   20.73
  -6   1   5  588.64   23.09
  -6   1   5  517.93   21.90
  -6   1   5  541.17   25.32
  -6   1   6  544.56   26.33
  -6   1   6  625.78   24.90
  -6   1   6  578.60   22.90
  -6   1   6  578.39   23.74
  -6   1   7 1022.91   35.39
  -6   1   7 1018.08   36.85
  -6   1   7 1063.27   40.54
  -6   1   8  749.60   33.40
  -6   1   8  840.37   30.93
  -6   1   9   15.37    3.71
  -6   1   9    7.49    2.88
  -6   1  10  111.18    9.93
  -6   2 -10  396.35   21.30
  -6   2  -9  604.44   27.08
  -6   2  -8  372.46   14.50
  -6   2  -8  387.14   20.05
  -6   2  -7  182.07   13.06
  -6   2  -7  197.39    7.01
  -6   2  -7  186.81    9.59
  -6   2  -6  246.94   15.31
  -6   2  -6  262.00    9.84
  -6   2  -6  261.46   11.94
  -6   2  -5  131.78    6.77
  -6   2  -5  113.10    9.92
  -6   2  -5  117.50    7.48
  -6   2  -4  260.85   15.50
  -6   2  -4  256.85    8.56
  -6   2  -4  249.66    8.66
  -6   2  -4  254.15   10.89
  -6   2  -4  258.00   11.91
  -6   2  -3  126.39   10.36
  -6   2  -3  116.22    5.84
  -6   2  -3  108.84    5.78
  -6   2  -3  119.37    7.16
  -6   2  -3  115.61    7.42
  -6   2  -2  873.04   27.65
  -6   2  -2  887.00   27.27
  -6   2  -1  793.97   26.29
  -6   2  -1  855.36   26.79
  -6   2   0  345.04   15.38
  -6   2   0  353.66   18.74
  -6   2   0  398.61   15.91
  -6   2   1   10.42    3.38
  -6   2   1    6.19    1.64
  -6   2   1    6.41    1.99
  -6   2   2    4.95    1.52
  -6   2   2    2.69    0.96
  -6   2   2    2.87    2.16
  -6   2   2    6.11    1.78
  -6   2   3    3.70    1.99
  -6   2   3    0.87    0.87
  -6   2   3    1.78    1.37
  -6   2   4   21.93    3.93
  -6   2   4   25.09    4.13
  -6   2   4   21.89    3.49
  -6   2   4   21.70    4.64
  -6   2   5  133.56   11.99
  -6   2   5  126.13    9.91
  -6   2   5  136.99   10.29
  -6   2   5  159.60   10.17
  -6   2   6  246.40   16.81
  -6   2   6  238.90   13.43
  -6   2   6  254.54   14.73
  -6   2   6  254.09   15.01
  -6   2   7    0.89    1.57
  -6   2   7    6.06    2.07
  -6   2   8   12.07    3.50
  -6   2   9  439.11   22.02
  -6   2  10   69.99    8.43
  -6   3 -10  239.85   15.48
  -6   3  -9  400.16   20.54
  -6   3  -9  367.94   15.75
  -6   3  -8  272.23   13.07
  -6   3  -8  282.73   16.67
  -6   3  -7  137.22   10.82
  -6   3  -7  117.10    8.19
  -6   3  -6  796.86   26.87
  -6   3  -6  783.86   21.61
  -6   3  -6  751.13   30.45
  -6   3  -5   12.56    1.48
  -6   3  -5   14.85    2.86
  -6   3  -5   13.50    1.47
  -6   3  -5   11.40    3.31
  -6   3  -5   14.53    2.05
  -6   3  -4   51.61    5.16
  -6   3  -4   44.47    3.45
  -6   3  -4   45.39    6.07
  -6   3  -4   49.99    4.14
  -6   3  -3  119.76    7.23
  -6   3  -3  119.08   10.19
  -6   3  -3  117.06    6.45
  -6   3  -3  120.34    8.24
  -6   3  -2  481.77   16.79
  -6   3  -2  489.31   18.09
  -6   3  -2  432.73   21.66
  -6   3  -2  474.05   18.88
  -6   3  -1 1014.63   38.10
  -6   3  -1 1048.54   33.02
  -6   3  -1 1149.14   34.55
  -6   3  -1 1059.91   31.84
  -6   3   0  844.68   33.92
  -6   3   0  940.92   30.14
  -6   3   0  893.92   29.89
  -6   3   1  452.72   18.90
  -6   3   1  431.19   18.34
  -6   3   1  467.87   22.75
  -6   3   1  439.21   19.64
  -6   3   2  103.36    8.18
  -6   3   2  112.67    8.95
  -6   3   2  109.11    8.19
  -6   3   3  248.75   13.12
  -6   3   3  251.81   16.82
  -6   3   3  227.50   13.80
  -6   3   3  218.23   13.04
  -6   3   4   10.14    2.60
  -6   3   4   11.36    2.90
  -6   3   4   13.35    3.90
  -6   3   4    8.11    2.26
  -6   3   5   18.65    3.70
  -6   3   5   18.60    3.88
  -6   3   5   11.69    3.31
  -6   3   6  326.04   18.07
  -6   3   7  522.59   24.50
  -6   3   8    7.52    2.38
  -6   3   9   90.19    9.65
  -6   4 -10  740.06   30.47
  -6   4  -9  263.18   13.77
  -6   4  -9  287.19   16.83
  -6   4  -8   81.64    8.36
  -6   4  -8   78.28    7.03
  -6   4  -7   28.40    4.19
  -6   4  -7   30.58    5.09
  -6   4  -6  222.30    8.20
  -6   4  -6  220.85    7.90
  -6   4  -6  220.23   14.40
  -6   4  -6  202.95   12.03
  -6   4  -5   11.06    3.30
  -6   4  -5   18.43    2.35
  -6   4  -5   16.53    2.20
  -6   4  -5   19.93    3.49
  -6   4  -4    5.62    1.49
  -6   4  -4    3.20    2.08
  -6   4  -3  332.58   15.70
  -6   4  -3  297.81   17.54
  -6   4  -3  310.57   12.89
  -6   4  -3  316.11   13.47
  -6   4  -2    9.46    2.51
  -6   4  -2    6.65    1.66
  -6   4  -2    7.51    1.90
  -6   4  -2   10.16    3.14
  -6   4  -1  498.86   20.29
  -6   4  -1  465.84   18.98
  -6   4  -1  468.16   23.28
  -6   4  -1  487.22   18.55
  -6   4   0  568.08   21.51
  -6   4   0  599.05   24.13
  -6   4   0  551.31   22.55
  -6   4   0  603.00   22.68
  -6   4   0  585.53   26.90
  -6   4   1    2.19    1.21
  -6   4   1    0.81    0.98
  -6   4   1    1.35    1.23
  -6   4   1    1.79    1.31
  -6   4   1    1.82    1.64
  -6   4   2   45.77    5.69
  -6   4   2   51.81    5.64
  -6   4   2   43.44    5.78
  -6   4   2   47.23    7.15
  -6   4   2   47.84    5.58
  -6   4   3 1220.37   39.60
  -6   4   3 1185.16   40.33
  -6   4   3 1281.11   42.05
  -6   4   3 1183.58   39.06
  -6   4   3 1166.33   45.06
  -6   4   4  246.18   17.40
  -6   4   4  230.18   14.83
  -6   4   5  482.87   23.24
  -6   4   6   87.13    9.13
  -6   4   7    5.89    2.52
  -6   4   8  287.85   18.60
  -6   5  -9   82.92    8.52
  -6   5  -8  263.37   15.84
  -6   5  -8  237.45   14.12
  -6   5  -7   54.39    3.87
  -6   5  -7   57.98    7.26
  -6   5  -7   57.63    6.41
  -6   5  -6   82.53    8.61
  -6   5  -6   71.79    5.10
  -6   5  -6   76.45    7.44
  -6   5  -6   82.32    4.47
  -6   5  -5  197.01   12.59
  -6   5  -5  217.10   14.57
  -6   5  -5  211.13   10.07
  -6   5  -5  210.93    9.43
  -6   5  -4  804.30   32.20
  -6   5  -4  798.96   25.76
  -6   5  -4  763.13   24.93
  -6   5  -4  771.99   29.09
  -6   5  -3  121.69    8.03
  -6   5  -3  127.05   11.10
  -6   5  -3  117.63    7.87
  -6   5  -3  130.26    9.76
  -6   5  -2  118.48    8.24
  -6   5  -2  110.16   10.52
  -6   5  -2  108.73    7.86
  -6   5  -2  105.36    8.82
  -6   5  -1  285.61   17.99
  -6   5  -1  272.77   14.10
  -6   5  -1  314.37   16.01
  -6   5  -1  282.51   14.02
  -6   5  -1  281.97   15.63
  -6   5   0  549.37   27.08
  -6   5   0  555.20   23.42
  -6   5   0  620.56   25.32
  -6   5   0  586.48   23.30
  -6   5   0  556.29   22.40
  -6   5   1  123.64   10.28
  -6   5   1  141.86   12.68
  -6   5   1  134.76    9.70
  -6   5   1  124.56    9.81
  -6   5   2    4.77    2.02
  -6   5   2    5.60    2.53
  -6   5   2    2.92    2.10
  -6   5   2   10.87    3.73
  -6   5   3  239.35   15.30
  -6   5   3  222.45   13.76
  -6   5   4  267.61   15.88
  -6   5   4  301.68   17.86
  -6   5   5  223.04   15.81
  -6   5   5  259.15   15.80
  -6   5   6  156.75   12.29
  -6   5   6  144.44   12.79
  -6   6  -8    6.38    2.47
  -6   6  -7   44.69    4.37
  -6   6  -7   55.97    7.00
  -6   6  -6  163.57    7.69
  -6   6  -6  170.95    9.53
  -6   6  -5    1.82    1.06
  -6   6  -5    2.79    1.23
  -6   6  -5    3.52    2.11
  -6   6  -4  993.18   37.64
  -6   6  -4  961.76   31.31
  -6   6  -4  923.39   30.09
  -6   6  -3   63.80    5.93
  -6   6  -3   53.31    7.39
  -6   6  -3   62.19    6.12
  -6   6  -2  264.65   13.92
  -6   6  -2  242.67   16.82
  -6   6  -2  289.63   14.55
  -6   6  -2  248.96   14.90
  -6   6  -1   14.11    3.13
  -6   6  -1   17.07    3.34
  -6   6  -1   13.50    3.18
  -6   6  -1   12.75    3.83
  -6   6   0  107.39    8.90
  -6   6   0   93.40   10.55
  -6   6   0  102.15    8.83
  -6   6   0  103.11    9.55
  -6   6   1  278.76   16.60
  -6   6   1  251.31   14.80
  -6   6   1  252.73   18.26
  -6   6   2   32.22    5.12
  -6   6   2   31.56    6.29
  -6   6   3  450.18   23.44
  -6   6   3  472.16   22.51
  -6   6   4   75.11    8.37
  -6   6   4   65.48    8.41
  -6   6   5   76.16    9.33
  -6   7  -7  108.02    7.98
  -6   7  -7  129.42   11.23
  -6   7  -6  164.72   10.34
  -6   7  -6  149.99   12.69
  -6   7  -5   90.23    9.65
  -6   7  -5   80.53    7.26
  -6   7  -4  272.47   14.60
  -6   7  -4  277.93   17.95
  -6   7  -4  261.12   13.45
  -6   7  -3   21.31    3.91
  -6   7  -3   16.04    3.06
  -6   7  -3   16.01    3.96
  -6   7  -2   12.91    4.19
  -6   7  -2   14.49    3.17
  -6   7  -2   14.20    3.36
  -6   7  -2   11.75    3.39
  -6   7  -1   58.61    6.79
  -6   7  -1   52.94    6.91
  -6   7  -1   53.92    8.22
  -6   7   0    8.42    2.94
  -6   7   0    8.99    3.60
  -6   7   0   10.23    3.51
  -6   7   1   20.16    4.33
  -6   7   1   27.71    6.09
  -6   7   1   28.32    5.53
  -6   7   2  300.15   18.75
  -6   7   2  302.35   17.76
  -6   8  -3  245.32   15.15
  -6   8  -3  260.24   18.54
  -6   8  -2   48.51    6.72
  -6   8  -2   47.06    6.47
  -6   8  -2   46.06    7.82
  -5  -8   0  103.27   10.84
  -5  -8   0  105.03    7.45
  -5  -8   1   61.88    8.18
  -5  -8   1   67.50    6.24
  -5  -8   2   75.92    6.91
  -5  -8   2   63.65    7.04
  -5  -8   2   73.83    8.80
  -5  -8   3   46.60    6.87
  -5  -8   3   35.78    5.09
  -5  -8   4  328.86   19.44
  -5  -8   4  298.34   16.45
  -5  -8   5  159.97   12.90
  -5  -8   5  170.96   12.11
  -5  -8   6  450.74   23.20
  -5  -8   6  438.71   21.52
  -5  -8   7  358.47   19.59
  -5  -8   8  122.84   11.02
  -5  -7  -3  279.93   17.95
  -5  -7  -2  342.56   19.40
  -5  -7  -1  190.86   14.13
  -5  -7  -1  176.54    8.89
  -5  -7  -1  168.50   12.62
  -5  -7   0  251.54   11.88
  -5  -7   0  245.50   16.11
  -5  -7   0  248.34   15.13
  -5  -7   1   29.17    4.76
  -5  -7   1   23.42    4.83
  -5  -7   1   23.69    3.52
  -5  -7   2   19.65    3.43
  -5  -7   2   12.08    3.57
  -5  -7   2   16.33    3.30
  -5  -7   2   17.51    3.57
  -5  -7   3   27.40    4.92
  -5  -7   3   35.29    4.74
  -5  -7   3   31.87    4.54
  -5  -7   3   29.62    4.82
  -5  -7   4  577.00   23.29
  -5  -7   4  521.80   23.90
  -5  -7   4  583.40   22.04
  -5  -7   5  800.96   26.58
  -5  -7   5  761.49   29.27
  -5  -7   6  205.87   10.34
  -5  -7   6  210.99   13.40
  -5  -7   7  214.76   13.97
  -5  -7   7  212.62    9.70
  -5  -7   8  285.24   16.87
  -5  -7   9  262.18   16.57
  -5  -7  10  138.18   11.95
  -5  -6  -5   44.60    6.56
  -5  -6  -5   43.75    6.92
  -5  -6  -4   43.25    6.24
  -5  -6  -4   40.29    6.34
  -5  -6  -4   47.33    5.30
  -5  -6  -3  621.47   27.32
  -5  -6  -3  570.35   22.79
  -5  -6  -2  190.85   11.52
  -5  -6  -2  219.27   14.30
  -5  -6  -2  202.61    8.29
  -5  -6  -2  211.50   14.19
  -5  -6  -1  207.14    9.52
  -5  -6  -1  187.46   13.34
  -5  -6  -1  198.49   11.79
  -5  -6  -1  232.03   14.25
  -5  -6   0  431.74   20.03
  -5  -6   0  383.79   17.73
  -5  -6   0  396.95   15.40
  -5  -6   0  398.13   20.21
  -5  -6   0  356.58   19.41
  -5  -6   1   10.79    2.32
  -5  -6   1   12.31    3.07
  -5  -6   1   13.37    3.56
  -5  -6   1    7.28    2.62
  -5  -6   1   13.34    3.01
  -5  -6   2    1.78    0.95
  -5  -6   2    2.08    1.21
  -5  -6   2    1.64    1.38
  -5  -6   2    4.12    1.91
  -5  -6   3   51.95    6.01
  -5  -6   3   51.05    6.64
  -5  -6   3   60.47    6.37
  -5  -6   3   57.15    5.72
  -5  -6   3   62.56    6.12
  -5  -6   4   96.94    8.56
  -5  -6   4  105.66    7.74
  -5  -6   4   92.79    7.75
  -5  -6   4  102.87    9.43
  -5  -6   4  105.79    8.79
  -5  -6   5  330.89   17.60
  -5  -6   5  350.80   16.81
  -5  -6   5  366.44   15.24
  -5  -6   5  330.37   17.22
  -5  -6   5  329.89   18.25
  -5  -6   6  144.64    8.42
  -5  -6   6  128.71   10.62
  -5  -6   6  135.81   10.06
  -5  -6   6  129.38   10.34
  -5  -6   6  133.97   10.87
  -5  -6   7   27.85    4.52
  -5  -6   7   34.86    3.64
  -5  -6   7   39.86    5.92
  -5  -6   8   30.29    3.04
  -5  -6   8   32.82    5.10
  -5  -6   9   86.66    4.56
  -5  -6   9   95.63    9.16
  -5  -6  10  155.82   12.25
  -5  -6  11  303.07   18.29
  -5  -5  -6  279.93   17.92
  -5  -5  -6  261.75   15.89
  -5  -5  -6  238.67   14.07
  -5  -5  -5  179.64   12.02
  -5  -5  -5  205.74   14.69
  -5  -5  -5  200.07   13.43
  -5  -5  -4  402.88   16.60
  -5  -5  -4  380.65   18.77
  -5  -5  -3  173.47    9.77
  -5  -5  -3  139.17    4.53
  -5  -5  -3  163.70   11.60
  -5  -5  -3  158.26   11.10
  -5  -5  -3  176.44   12.64
  -5  -5  -3  151.88    4.59
  -5  -5  -2  889.94   33.45
  -5  -5  -2  949.43   29.78
  -5  -5  -2  907.19   33.06
  -5  -5  -2  843.49   31.86
  -5  -5  -2  886.31   24.76
  -5  -5  -1  433.50   15.09
  -5  -5  -1  446.42   20.67
  -5  -5  -1  433.45   17.75
  -5  -5  -1  415.09   19.75
  -5  -5  -1  440.61   20.47
  -5  -5   0  204.25   13.04
  -5  -5   0  214.94   10.00
  -5  -5   0  220.72   13.18
  -5  -5   0  217.25   13.26
  -5  -5   0  227.07   11.89
  -5  -5   1  782.53   25.23
  -5  -5   1  764.34   29.49
  -5  -5   1  841.85   29.22
  -5  -5   1  746.03   26.86
  -5  -5   2  258.14   13.48
  -5  -5   2  256.24   14.67
  -5  -5   2  269.97   13.61
  -5  -5   2  234.03   11.79
  -5  -5   3 1000.48   34.05
  -5  -5   3  876.79   31.01
  -5  -5   3  922.37   30.07
  -5  -5   3  924.05   30.88
  -5  -5   4   42.58    4.73
  -5  -5   4   50.06    5.59
  -5  -5   4   46.16    5.79
  -5  -5   4   45.75    5.06
  -5  -5   5   95.64    8.32
  -5  -5   5   81.63    7.65
  -5  -5   5   95.21    8.41
  -5  -5   5   82.20    7.17
  -5  -5   5   86.56    6.60
  -5  -5   6   33.43    4.94
  -5  -5   6   35.21    4.03
  -5  -5   6   35.49    5.03
  -5  -5   6   35.37    4.86
  -5  -5   6   42.85    5.77
  -5  -5   7   57.95    6.42
  -5  -5   7   48.43    6.07
  -5  -5   7   57.65    6.90
  -5  -5   7   48.38    6.01
  -5  -5   7   58.19    4.97
  -5  -5   8  415.22   19.57
  -5  -5   8  383.88   14.47
  -5  -5   8  365.30   18.14
  -5  -5   8  349.11   17.97
  -5  -5   9   60.10    6.79
  -5  -5   9   52.57    6.19
  -5  -5   9   59.62    6.90
  -5  -5   9   51.41    4.17
  -5  -5  10    0.89    0.53
  -5  -5  10    3.44    2.16
  -5  -5  10    4.43    2.14
  -5  -5  11  376.89   20.25
  -5  -5  11  335.85   17.16
  -5  -5  12   77.49    8.83
  -5  -4  -7    2.76    1.63
  -5  -4  -7    6.01    2.37
  -5  -4  -7    3.52    1.85
  -5  -4  -6   18.38    3.49
  -5  -4  -6   20.12    4.49
  -5  -4  -6   20.05    3.92
  -5  -4  -5   10.61    2.73
  -5  -4  -5   15.27    3.15
  -5  -4  -5   19.44    4.61
  -5  -4  -4  117.17    7.09
  -5  -4  -4  117.59    8.86
  -5  -4  -4  130.04    9.72
  -5  -4  -4  123.77   10.56
  -5  -4  -3    2.53    0.45
  -5  -4  -3   -0.13    1.05
  -5  -4  -3    3.72    1.55
  -5  -4  -3    3.19    1.80
  -5  -4  -3    0.82    0.96
  -5  -4  -3    3.53    0.51
  -5  -4  -2  528.09   15.85
  -5  -4  -2  516.00   22.86
  -5  -4  -2  539.34   19.12
  -5  -4  -2  517.82   21.93
  -5  -4  -2  534.71   15.53
  -5  -4  -2  516.56   21.72
  -5  -4  -1  353.02   17.35
  -5  -4  -1  339.45   14.32
  -5  -4  -1  333.04   12.24
  -5  -4  -1  376.36   17.17
  -5  -4   0   31.31    3.80
  -5  -4   0   36.21    4.86
  -5  -4   0   36.35    3.51
  -5  -4   0   35.76    4.80
  -5  -4   1  478.37   18.14
  -5  -4   1  423.40   19.16
  -5  -4   1  431.00   18.91
  -5  -4   1  449.57   16.49
  -5  -4   2  596.61   22.96
  -5  -4   2  613.76   21.11
  -5  -4   2  600.01   22.12
  -5  -4   2  623.48   24.11
  -5  -4   3 1420.16   43.87
  -5  -4   3 1543.26   44.53
  -5  -4   3 1544.09   46.27
  -5  -4   4 1480.90   45.16
  -5  -4   4 1440.08   42.83
  -5  -4   4 1462.21   44.06
  -5  -4   5  973.62   30.34
  -5  -4   5  902.01   31.91
  -5  -4   5  931.81   32.01
  -5  -4   6  343.58   14.87
  -5  -4   6  337.62   16.58
  -5  -4   7  607.41   24.65
  -5  -4   7  571.98   23.23
  -5  -4   7  563.46   20.67
  -5  -4   7  577.41   23.02
  -5  -4   8  325.15   16.55
  -5  -4   8  335.79   14.14
  -5  -4   8  306.74   17.00
  -5  -4   8  332.58   16.13
  -5  -4   9  421.56   18.75
  -5  -4   9  452.17   20.27
  -5  -4   9  416.88   16.52
  -5  -4  10  885.58   27.81
  -5  -4  10  862.55   29.89
  -5  -4  10  817.59   31.38
  -5  -4  11  128.11    7.90
  -5  -4  11  131.38   10.92
  -5  -4  11  125.85    8.95
  -5  -4  12  135.02   11.59
  -5  -3  -8  144.74   12.37
  -5  -3  -8  146.30   10.47
  -5  -3  -7  101.03    8.23
  -5  -3  -7  104.23   10.08
  -5  -3  -6  570.31   22.33
  -5  -3  -6  512.75   20.54
  -5  -3  -6  546.08   25.21
  -5  -3  -5  233.22   14.90
  -5  -3  -5  241.38   12.63
  -5  -3  -5  240.90   13.11
  -5  -3  -4  275.13   10.89
  -5  -3  -4  287.13   14.00
  -5  -3  -4  288.89   16.35
  -5  -3  -4  267.86   14.01
  -5  -3  -3   63.72    3.00
  -5  -3  -3   64.75    4.68
  -5  -3  -3   74.76    7.58
  -5  -3  -3   70.18    6.37
  -5  -3  -3   74.75    3.02
  -5  -3  -3   61.02    6.04
  -5  -3  -2  268.69    9.26
  -5  -3  -2  278.88   11.46
  -5  -3  -2  288.20   14.02
  -5  -3  -2  259.67    9.42
  -5  -3  -2  278.44   15.03
  -5  -3  -1    6.63    1.53
  -5  -3  -1    6.37    1.86
  -5  -3  -1    4.84    1.97
  -5  -3  -1    7.77    1.38
  -5  -3  -1    6.23    1.37
  -5  -3   0    4.47    1.76
  -5  -3   0    6.80    1.73
  -5  -3   0    6.24    1.92
  -5  -3   1  197.28    9.94
  -5  -3   1  171.29   10.64
  -5  -3   1  176.39   10.66
  -5  -3   2 2951.47   77.09
  -5  -3   2 2882.33   77.10
  -5  -3   2 2801.77   74.81
  -5  -3   3  102.08    7.80
  -5  -3   3  101.27    7.65
  -5  -3   3  121.28    8.09
  -5  -3   4    8.51    2.25
  -5  -3   4    7.25    2.24
  -5  -3   4    8.40    2.14
  -5  -3   5   23.51    3.65
  -5  -3   5   19.57    3.14
  -5  -3   5   25.45    3.91
  -5  -3   6  718.36   25.12
  -5  -3   6  660.23   24.97
  -5  -3   6  662.12   24.06
  -5  -3   6  666.97   25.37
  -5  -3   7 1070.69   34.71
  -5  -3   7 1164.40   35.19
  -5  -3   7 1084.45   35.94
  -5  -3   7 1045.98   36.12
  -5  -3   8  929.54   33.48
  -5  -3   8  976.96   31.46
  -5  -3   8  953.03   32.86
  -5  -3   8  924.44   30.98
  -5  -3   9  724.15   26.10
  -5  -3   9  730.14   28.81
  -5  -3   9  735.70   27.93
  -5  -3   9  749.96   25.90
  -5  -3  10  128.20    9.12
  -5  -3  10  137.32   10.38
  -5  -3  11  504.03   20.84
  -5  -3  12  101.75    8.29
  -5  -2  -9   71.93    6.57
  -5  -2  -9   70.03    8.55
  -5  -2  -8  668.57   28.97
  -5  -2  -8  621.67   23.47
  -5  -2  -7  256.32   12.86
  -5  -2  -7  262.90   16.17
  -5  -2  -6 1009.62   37.22
  -5  -2  -6 1056.02   33.15
  -5  -2  -5 1464.16   43.45
  -5  -2  -5 1514.03   48.15
  -5  -2  -4  674.74   23.80
  -5  -2  -4  663.59   19.42
  -5  -2  -4  607.44   25.90
  -5  -2  -3  322.06   14.47
  -5  -2  -3  317.06    9.81
  -5  -2  -3  331.73   16.59
  -5  -2  -3  321.58   11.32
  -5  -2  -2 1096.93   36.65
  -5  -2  -2 1119.22   29.38
  -5  -2  -2 1116.73   34.65
  -5  -2  -2 1116.25   30.90
  -5  -2  -1  121.25    6.67
  -5  -2  -1  130.03    6.19
  -5  -2  -1  116.96    8.10
  -5  -2  -1  133.81    9.41
  -5  -2   0  130.76    6.58
  -5  -2   0  146.54    9.64
  -5  -2   0  129.79    7.24
  -5  -2   0  120.58    8.24
  -5  -2   1  589.65   22.71
  -5  -2   1  642.73   22.32
  -5  -2   1  572.29   20.12
  -5  -2   2   41.44    4.81
  -5  -2   2   29.27    3.81
  -5  -2   2   34.02    3.75
  -5  -2   3 1104.33   35.78
  -5  -2   3 1102.56   34.30
  -5  -2   3 1210.28   35.53
  -5  -2   4   49.00    5.05
  -5  -2   4   52.04    5.51
  -5  -2   4   56.37    5.57
  -5  -2   5   24.89    3.67
  -5  -2   5   31.99    4.29
  -5  -2   5   26.45    3.84
  -5  -2   5   25.44    3.57
  -5  -2   6 1706.51   50.30
  -5  -2   6 1679.85   50.27
  -5  -2   6 1842.89   49.49
  -5  -2   6 1664.97   50.12
  -5  -2   7    8.62    2.31
  -5  -2   7    8.04    2.02
  -5  -2   7   12.94    2.96
  -5  -2   7    8.85    2.40
  -5  -2   8  151.85   10.65
  -5  -2   8  126.25    9.43
  -5  -2   8  138.15    9.80
  -5  -2   9  365.54   15.31
  -5  -2   9  362.15   17.61
  -5  -2   9  376.24   18.58
  -5  -2   9  349.36   17.41
  -5  -2  10  106.43    8.96
  -5  -2  10  109.51    9.23
  -5  -2  10  110.13    7.66
  -5  -2  11  152.60    9.52
  -5  -2  11  154.70   11.37
  -5  -2  12    1.83    1.73
  -5  -2  12    3.37    1.66
  -5  -1 -10   15.26    2.83
  -5  -1 -10   20.78    4.42
  -5  -1  -9   49.46    6.77
  -5  -1  -9   47.67    4.66
  -5  -1  -8   20.15    2.97
  -5  -1  -8   12.60    3.39
  -5  -1  -7  631.33   27.19
  -5  -1  -7  690.18   22.78
  -5  -1  -6  174.35   12.30
  -5  -1  -6  197.05    9.97
  -5  -1  -5  567.66   24.32
  -5  -1  -5  602.00   20.75
  -5  -1  -4  553.99   23.13
  -5  -1  -4  561.46   15.62
  -5  -1  -4  558.22   15.08
  -5  -1  -3   27.64    4.41
  -5  -1  -3   24.16    2.13
  -5  -1  -3   26.33    2.26
  -5  -1  -2  108.73    8.47
  -5  -1  -2  106.48    5.36
  -5  -1  -2  112.79    5.56
  -5  -1  -1   13.31    1.92
  -5  -1  -1   13.76    1.87
  -5  -1   0 1658.16   47.13
  -5  -1   0 1670.60   44.72
  -5  -1   0 1745.34   44.44
  -5  -1   0 1588.12   48.96
  -5  -1   1 2035.10   58.53
  -5  -1   1 2068.96   56.42
  -5  -1   1 2019.45   54.26
  -5  -1   1 2132.32   53.98
  -5  -1   2 1034.86   32.01
  -5  -1   2  998.94   30.90
  -5  -1   2 1071.88   32.28
  -5  -1   2 1068.71   30.62
  -5  -1   2 1050.77   34.32
  -5  -1   3  669.60   22.99
  -5  -1   3  641.02   22.01
  -5  -1   3  625.53   24.05
  -5  -1   3  633.27   21.43
  -5  -1   4  396.45   15.85
  -5  -1   4  317.11   14.85
  -5  -1   4  334.59   16.33
  -5  -1   4  387.28   15.22
  -5  -1   5  266.18   13.43
  -5  -1   5  317.56   13.73
  -5  -1   5  284.18   14.84
  -5  -1   5  303.75   14.20
  -5  -1   6  162.32   10.18
  -5  -1   6  174.41   10.49
  -5  -1   6  167.21   10.97
  -5  -1   6  133.10    8.82
  -5  -1   6  171.45    9.48
  -5  -1   7  663.38   23.91
  -5  -1   7  646.79   24.51
  -5  -1   7  609.10   25.04
  -5  -1   7  613.50   24.21
  -5  -1   7  654.21   22.94
  -5  -1   8  519.02   19.95
  -5  -1   8  524.56   22.07
  -5  -1   8  470.94   20.20
  -5  -1   8  509.06   21.52
  -5  -1   8  523.13   22.62
  -5  -1   9  567.79   24.71
  -5  -1   9  613.52   24.96
  -5  -1   9  648.41   26.36
  -5  -1   9  645.45   23.33
  -5  -1   9  606.57   24.04
  -5  -1  10   37.50    5.42
  -5  -1  10   36.32    5.44
  -5  -1  10   38.10    4.66
  -5  -1  11    3.51    2.45
  -5  -1  11    1.97    1.31
  -5  -1  12   31.01    5.49
  -5  -1  12   34.31    4.89
  -5   0 -10   29.54    5.24
  -5   0  -9  156.55    7.69
  -5   0  -9  167.15   12.41
  -5   0  -8  105.80    9.50
  -5   0  -8  105.83    6.19
  -5   0  -7  368.61   13.42
  -5   0  -7  321.08   17.58
  -5   0  -6  423.13   19.77
  -5   0  -6  413.17   12.26
  -5   0  -6  419.43   15.01
  -5   0  -5   36.00    5.02
  -5   0  -5   39.10    3.70
  -5   0  -5   45.85    3.14
  -5   0  -4  210.55    8.28
  -5   0  -4  214.44   12.63
  -5   0  -3   91.75    7.86
  -5   0  -3   96.62    5.23
  -5   0  -3   98.44    4.30
  -5   0  -2  242.24    8.87
  -5   0  -2  228.01   12.90
  -5   0  -2  236.37    9.41
  -5   0  -1 1053.25   31.25
  -5   0  -1 1050.13   29.24
  -5   0  -1 1099.92   30.04
  -5   0  -1 1062.90   35.00
  -5   0   0  532.28   18.28
  -5   0   0  502.30   16.83
  -5   0   0  492.31   20.63
  -5   0   0  487.97   16.55
  -5   0   1  384.59   14.17
  -5   0   1  355.30   13.83
  -5   0   1  375.36   17.19
  -5   0   1  382.42   15.12
  -5   0   2 3199.96   81.31
  -5   0   2 3137.34   79.80
  -5   0   2 3241.83   85.01
  -5   0   2 3078.61   80.08
  -5   0   3   26.92    4.22
  -5   0   3   22.08    3.11
  -5   0   3   20.95    3.20
  -5   0   3   23.14    3.06
  -5   0   4 1047.21   32.74
  -5   0   4 1033.83   31.41
  -5   0   4  997.32   31.77
  -5   0   4 1037.96   32.19
  -5   0   4  986.11   34.67
  -5   0   5  198.09   12.48
  -5   0   5  220.82   11.43
  -5   0   5  188.91   10.90
  -5   0   5  199.65   10.64
  -5   0   6  203.91   13.11
  -5   0   6  211.70   11.44
  -5   0   6  232.82   12.43
  -5   0   6  185.84   11.44
  -5   0   6  214.51   11.27
  -5   0   7  551.49   21.09
  -5   0   7  518.25   23.31
  -5   0   7  531.99   20.76
  -5   0   7  539.10   21.96
  -5   0   7  515.16   21.75
  -5   0   8  264.13   13.80
  -5   0   8  274.49   13.87
  -5   0   8  279.78   15.07
  -5   0   8  248.87   14.35
  -5   0   9  646.29   26.86
  -5   0   9  686.13   27.42
  -5   0   9  698.57   26.15
  -5   0   9  727.54   26.47
  -5   0  10   12.02    2.84
  -5   0  11   39.74    5.42
  -5   1 -11   -0.92    1.91
  -5   1 -10    9.16    2.74
  -5   1  -9   97.12    3.74
  -5   1  -9   97.32    3.73
  -5   1  -9  101.57    9.29
  -5   1  -8  181.08   12.42
  -5   1  -8  197.80    7.14
  -5   1  -8  188.09    7.09
  -5   1  -7 1015.72   36.25
  -5   1  -7 1051.22   28.78
  -5   1  -7 1058.15   28.24
  -5   1  -7 1059.34   28.21
  -5   1  -6 1530.63   40.70
  -5   1  -6 1562.14   40.26
  -5   1  -6 1433.74   47.17
  -5   1  -6 1557.76   40.01
  -5   1  -5   49.67    3.81
  -5   1  -5   43.50    5.47
  -5   1  -5   48.57    3.63
  -5   1  -4  473.99   15.78
  -5   1  -4  455.77   20.02
  -5   1  -4  469.78   15.60
  -5   1  -3   66.02    4.64
  -5   1  -3   72.53    4.84
  -5   1  -3   72.09    6.81
  -5   1  -3   61.75    3.39
  -5   1  -2   56.52    4.32
  -5   1  -2   51.29    4.20
  -5   1  -2   50.26    5.65
  -5   1  -2   51.23    3.50
  -5   1  -1  203.33    9.65
  -5   1  -1  194.21   11.98
  -5   1  -1  221.74    9.02
  -5   1  -1  210.98    9.50
  -5   1   0 3843.13   97.19
  -5   1   0 4112.50  102.75
  -5   1   0 3833.56   96.36
  -5   1   1   42.42    5.32
  -5   1   1   49.46    4.35
  -5   1   1   49.45    4.57
  -5   1   2   98.17    6.94
  -5   1   2   94.21    6.94
  -5   1   2   96.54    6.54
  -5   1   2  101.97    8.52
  -5   1   3  376.04   15.20
  -5   1   3  382.54   18.53
  -5   1   3  375.84   16.01
  -5   1   3  387.01   16.29
  -5   1   4   90.50    6.73
  -5   1   4  116.91    8.12
  -5   1   4  114.45    7.99
  -5   1   4  100.38    8.96
  -5   1   5  450.89   18.67
  -5   1   5  433.20   18.63
  -5   1   5  439.14   20.78
  -5   1   5  451.37   17.87
  -5   1   6  441.02   19.28
  -5   1   6  443.64   19.74
  -5   1   7  126.34    9.28
  -5   1   7  132.85    8.97
  -5   1   7  112.30    9.10
  -5   1   8   83.39    7.77
  -5   1   8   75.89    7.60
  -5   1   8   88.72    7.50
  -5   1   9  195.06   12.55
  -5   1  10    1.68    0.95
  -5   1  11   83.03    8.56
  -5   2 -11   26.41    4.67
  -5   2 -10  512.39   23.16
  -5   2  -9   11.28    2.89
  -5   2  -8  417.34   15.26
  -5   2  -8  437.20   20.16
  -5   2  -7  693.98   21.82
  -5   2  -7  627.69   25.87
  -5   2  -6  162.40   10.90
  -5   2  -6  147.41    5.84
  -5   2  -6  145.84    5.77
  -5   2  -6  146.96    7.89
  -5   2  -5   44.46    5.45
  -5   2  -5   44.01    3.16
  -5   2  -5   43.95    4.12
  -5   2  -4  309.45   11.35
  -5   2  -4  321.75   16.10
  -5   2  -4  312.39    9.53
  -5   2  -4  310.96   12.69
  -5   2  -4  311.95    9.61
  -5   2  -3  542.90   17.34
  -5   2  -3  502.06   21.70
  -5   2  -3  505.70   15.42
  -5   2  -3  552.23   18.48
  -5   2  -2  113.07    8.81
  -5   2  -2  113.23    6.88
  -5   2  -2  108.92    6.44
  -5   2  -1    3.85    1.34
  -5   2  -1    4.14    1.74
  -5   2  -1    5.47    1.42
  -5   2   0  115.10    7.16
  -5   2   0  113.39    7.17
  -5   2   0  109.53    8.86
  -5   2   1  126.79    8.37
  -5   2   1  129.40    7.72
  -5   2   2  328.47   17.05
  -5   2   2  338.07   14.07
  -5   2   2  327.76   14.96
  -5   2   2  325.91   14.54
  -5   2   3  382.82   16.68
  -5   2   3  330.60   14.77
  -5   2   3  387.72   16.46
  -5   2   3  393.63   19.14
  -5   2   4  191.21   13.22
  -5   2   4  214.18   12.09
  -5   2   4  205.10   10.94
  -5   2   4  210.83   11.81
  -5   2   5 1451.91   41.85
  -5   2   5 1338.38   42.82
  -5   2   5 1347.23   42.83
  -5   2   6  551.92   23.02
  -5   2   6  554.53   21.61
  -5   2   6  599.29   23.77
  -5   2   7    1.94    1.36
  -5   2   7    2.36    1.57
  -5   2   7    0.40    0.98
  -5   2   8  143.09   10.97
  -5   2   8  158.96   10.42
  -5   2   9   91.29    8.83
  -5   2  10   11.58    3.20
  -5   2  11  434.32   22.57
  -5   3 -11  265.03   15.52
  -5   3 -10   30.43    4.97
  -5   3  -9  180.54    9.79
  -5   3  -9  178.78   12.05
  -5   3  -8   23.19    4.12
  -5   3  -8   21.74    3.14
  -5   3  -7  627.08   21.83
  -5   3  -7  600.98   24.47
  -5   3  -6  714.06   24.12
  -5   3  -6  677.48   26.80
  -5   3  -6  712.08   18.14
  -5   3  -5    2.92    1.38
  -5   3  -5    3.14    1.72
  -5   3  -5    2.19    0.68
  -5   3  -5    3.74    0.86
  -5   3  -4  468.96   14.55
  -5   3  -4  469.37   17.73
  -5   3  -4  449.43   14.92
  -5   3  -4  448.54   20.28
  -5   3  -3  903.66   33.03
  -5   3  -3  995.54   27.27
  -5   3  -3  962.40   27.87
  -5   3  -3  936.13   29.84
  -5   3  -2 1881.79   51.96
  -5   3  -2 1945.72   50.63
  -5   3  -2 1928.45   49.75
  -5   3  -1 2470.64   66.24
  -5   3  -1 2481.38   67.21
  -5   3  -1 2604.77   65.65
  -5   3  -1 2688.43   72.71
  -5   3   0  283.65   14.07
  -5   3   0  317.06   13.68
  -5   3   0  293.60   16.11
  -5   3   0  337.68   14.24
  -5   3   1   30.56    3.78
  -5   3   1   24.72    4.54
  -5   3   1   24.73    3.47
  -5   3   1   23.74    3.71
  -5   3   2   84.71    6.61
  -5   3   2   86.82    7.34
  -5   3   2   86.62    8.54
  -5   3   2   84.26    6.95
  -5   3   3  472.08   19.67
  -5   3   3  479.84   20.29
  -5   3   3  468.05   18.76
  -5   3   4  445.58   18.77
  -5   3   4  466.56   20.54
  -5   3   5   94.67    7.55
  -5   3   5   92.37    8.19
  -5   3   5   80.47    7.64
  -5   3   6 1166.95   39.19
  -5   3   6 1160.54   39.00
  -5   3   6 1080.89   36.10
  -5   3   7  246.87   14.86
  -5   3   7  222.24   12.78
  -5   3   8   14.35    3.73
  -5   3   9   11.38    3.46
  -5   3  10  136.59   12.05
  -5   4 -11  255.86   14.68
  -5   4 -10   65.00    6.20
  -5   4 -10   75.91    7.54
  -5   4  -9  314.64   15.16
  -5   4  -9  363.13   17.60
  -5   4  -8   48.23    5.91
  -5   4  -8   45.08    4.97
  -5   4  -7   17.24    3.14
  -5   4  -7   18.95    1.57
  -5   4  -7   13.90    3.07
  -5   4  -6   85.72    3.43
  -5   4  -6   94.37    8.14
  -5   4  -6   75.39    6.59
  -5   4  -6   79.26    4.52
  -5   4  -5    3.47    0.83
  -5   4  -5    3.33    1.43
  -5   4  -5    1.47    1.11
  -5   4  -5    3.71    1.06
  -5   4  -4  955.76   27.20
  -5   4  -4  938.43   27.43
  -5   4  -4  982.34   33.86
  -5   4  -4  901.24   30.53
  -5   4  -3  577.48   19.24
  -5   4  -3  560.03   23.91
  -5   4  -3  576.53   19.21
  -5   4  -3  574.53   21.62
  -5   4  -2 1466.40   43.93
  -5   4  -2 1506.70   41.77
  -5   4  -2 1413.59   47.10
  -5   4  -2 1549.31   42.33
  -5   4  -1  419.75   17.14
  -5   4  -1  350.84   16.51
  -5   4  -1  406.67   15.76
  -5   4  -1  386.73   15.79
  -5   4  -1  362.77   18.90
  -5   4   0  899.66   33.63
  -5   4   0  864.86   30.15
  -5   4   0  866.99   29.19
  -5   4   0  868.12   28.82
  -5   4   0  884.41   28.36
  -5   4   1    3.75    1.18
  -5   4   1    3.84    2.13
  -5   4   1    3.53    1.45
  -5   4   1    4.76    1.42
  -5   4   1    5.58    1.89
  -5   4   2 1069.52   35.87
  -5   4   2 1004.10   33.65
  -5   4   2 1048.29   34.75
  -5   4   2 1123.25   34.78
  -5   4   3  933.80   30.47
  -5   4   3  961.95   31.65
  -5   4   3  914.09   30.05
  -5   4   4  512.07   22.51
  -5   4   4  522.88   21.01
  -5   4   4  474.99   21.52
  -5   4   4  482.03   20.86
  -5   4   5  826.39   30.80
  -5   4   5  752.47   28.11
  -5   4   5  788.25   30.74
  -5   4   6  115.95   10.29
  -5   4   7   71.43    8.20
  -5   4   7   85.06    8.34
  -5   4   8  118.92   11.12
  -5   4   8  113.33   10.22
  -5   4   9  119.58   11.55
  -5   4   9  134.55   11.56
  -5   5 -11  695.16   26.73
  -5   5 -10   86.17    7.84
  -5   5 -10  100.34    8.47
  -5   5  -9   67.92    6.89
  -5   5  -9   78.23    7.38
  -5   5  -8  432.84   13.68
  -5   5  -8  403.81   18.79
  -5   5  -8  445.03   19.89
  -5   5  -7    4.76    1.78
  -5   5  -7    3.26    1.13
  -5   5  -7    0.40    1.09
  -5   5  -6   22.37    3.92
  -5   5  -6   13.84    2.99
  -5   5  -6   20.22    1.85
  -5   5  -6   20.06    2.61
  -5   5  -5  153.21    8.30
  -5   5  -5  162.37   10.56
  -5   5  -5  171.99   11.82
  -5   5  -5  159.65    7.48
  -5   5  -4   13.79    2.14
  -5   5  -4   11.98    2.18
  -5   5  -4   13.09    3.04
  -5   5  -4   12.57    3.29
  -5   5  -3   19.95    3.64
  -5   5  -3   29.31    3.65
  -5   5  -3   24.00    4.52
  -5   5  -3   30.27    3.54
  -5   5  -2  659.90   24.98
  -5   5  -2  624.81   27.20
  -5   5  -2  698.20   23.65
  -5   5  -2  645.90   23.19
  -5   5  -2  731.99   26.06
  -5   5  -1  103.27    7.56
  -5   5  -1   98.59    8.06
  -5   5  -1  102.00    9.44
  -5   5  -1   96.30    7.93
  -5   5   0    0.95    0.75
  -5   5   0    3.33    1.43
  -5   5   0    4.05    1.93
  -5   5   0    3.63    2.17
  -5   5   0    4.71    1.57
  -5   5   1  423.38   22.05
  -5   5   1  436.00   18.67
  -5   5   1  421.66   19.73
  -5   5   1  471.77   19.72
  -5   5   1  410.97   18.76
  -5   5   2    0.93    1.18
  -5   5   2    3.78    1.60
  -5   5   2    2.47    1.15
  -5   5   2    2.60    1.36
  -5   5   3  269.33   15.80
  -5   5   3  272.09   14.88
  -5   5   3  278.24   14.86
  -5   5   4  283.11   15.60
  -5   5   4  269.70   16.16
  -5   5   5  432.84   20.55
  -5   5   5  393.89   21.05
  -5   5   6   56.77    7.49
  -5   5   6   62.93    7.43
  -5   5   7  513.31   25.74
  -5   5   7  501.43   23.94
  -5   5   8    6.71    2.88
  -5   6 -10  374.01   17.74
  -5   6  -9  429.38   19.45
  -5   6  -9  414.80   14.61
  -5   6  -8   16.55    2.53
  -5   6  -8   14.84    3.37
  -5   6  -7   31.29    4.85
  -5   6  -7   39.30    4.10
  -5   6  -6  158.04    7.50
  -5   6  -6  181.29   12.38
  -5   6  -6  207.07   12.92
  -5   6  -6  189.26    9.99
  -5   6  -5  595.32   25.23
  -5   6  -5  648.50   20.88
  -5   6  -5  636.58   26.55
  -5   6  -5  622.59   22.41
  -5   6  -4  375.28   15.17
  -5   6  -4  365.00   18.25
  -5   6  -4  362.74   19.11
  -5   6  -4  391.25   16.49
  -5   6  -3  634.24   23.13
  -5   6  -3  586.93   26.25
  -5   6  -3  599.34   23.84
  -5   6  -3  571.11   21.54
  -5   6  -3  633.14   25.25
  -5   6  -2  365.00   16.35
  -5   6  -2  314.73   16.76
  -5   6  -2  357.38   15.76
  -5   6  -2  312.92   16.36
  -5   6  -2  335.90   18.95
  -5   6  -1    3.71    1.41
  -5   6  -1    3.85    2.00
  -5   6  -1    3.21    1.78
  -5   6  -1    2.71    1.76
  -5   6  -1    3.41    1.43
  -5   6   0   83.99    8.00
  -5   6   0  100.09    8.75
  -5   6   0   93.64    7.97
  -5   6   0   85.63    7.62
  -5   6   1   17.15    3.58
  -5   6   1   26.53    4.21
  -5   6   1   15.35    3.62
  -5   6   2   49.14    6.30
  -5   6   2   48.30    6.18
  -5   6   2   53.00    6.30
  -5   6   3  205.04   13.34
  -5   6   3  188.94   13.69
  -5   6   4  586.35   25.61
  -5   6   4  578.81   26.94
  -5   6   5  100.08    9.75
  -5   6   5  108.79   10.72
  -5   6   6   71.87    8.61
  -5   6   6   59.17    8.24
  -5   7  -9  359.44   17.42
  -5   7  -8   62.41    6.82
  -5   7  -8   68.78    6.10
  -5   7  -7  115.60    8.38
  -5   7  -7  132.47   10.51
  -5   7  -6    9.80    2.56
  -5   7  -6   10.64    3.03
  -5   7  -5  341.37   18.58
  -5   7  -5  323.56   14.16
  -5   7  -5  336.38   16.05
  -5   7  -4  267.50   16.65
  -5   7  -4  252.26   12.98
  -5   7  -4  292.16   14.74
  -5   7  -3  454.04   19.86
  -5   7  -3  407.64   18.26
  -5   7  -3  476.14   23.47
  -5   7  -3  425.89   19.85
  -5   7  -2  948.53   33.52
  -5   7  -2  891.09   32.12
  -5   7  -2 1001.68   38.36
  -5   7  -2  971.08   34.43
  -5   7  -1  307.24   17.06
  -5   7  -1  328.33   19.91
  -5   7  -1  327.44   16.98
  -5   7  -1  303.42   16.22
  -5   7   0  578.80   24.25
  -5   7   0  512.23   23.15
  -5   7   0  517.04   23.90
  -5   7   0  536.28   27.19
  -5   7   1  353.90   18.70
  -5   7   1  360.76   19.59
  -5   7   2  333.32   19.29
  -5   7   2  370.07   19.35
  -5   7   3   24.24    4.90
  -5   7   3   23.14    4.95
  -5   7   4  613.45   27.51
  -5   7   4  586.17   28.41
  -5   8  -7   43.44    5.39
  -5   8  -7   59.49    7.12
  -5   8  -6  385.94   20.31
  -5   8  -6  373.84   18.15
  -5   8  -5   20.35    4.63
  -5   8  -5   26.37    4.32
  -5   8  -4    2.06    1.23
  -5   8  -4    2.82    1.83
  -5   8  -4    2.41    1.71
  -5   8  -3  321.12   19.68
  -5   8  -3  306.85   16.17
  -5   8  -3  314.25   17.05
  -5   8  -3  295.00   16.69
  -5   8  -2    1.57    2.24
  -5   8  -2    2.50    1.63
  -5   8  -2    2.92    2.09
  -5   8  -1   11.25    3.11
  -5   8  -1   20.09    4.90
  -5   8  -1   24.28    5.00
  -5   8   0  358.59   19.74
  -5   8   0  340.66   19.22
  -5   8   1  127.33   11.20
  -5   8   1  127.23   11.60
  -4  -9   2  425.12   19.36
  -4  -9   3  247.28   14.46
  -4  -9   3  253.57   17.10
  -4  -9   4    3.14    2.00
  -4  -9   4    3.83    2.09
  -4  -9   5    0.89    1.73
  -4  -9   5    3.24    2.42
  -4  -9   6  129.48   11.66
  -4  -9   6  138.33   11.46
  -4  -9   7  182.79   14.02
  -4  -9   7  174.45   13.50
  -4  -8  -2  168.74   13.82
  -4  -8  -1  527.10   25.90
  -4  -8  -1  537.80   19.35
  -4  -8   0  251.46   13.34
  -4  -8   0  254.16   12.37
  -4  -8   0  244.27   16.37
  -4  -8   1   32.00    4.67
  -4  -8   1   39.52    6.15
  -4  -8   1   44.33    4.99
  -4  -8   2  386.85   20.54
  -4  -8   2  355.84   16.52
  -4  -8   3  190.45   11.87
  -4  -8   3  166.80   12.23
  -4  -8   3  200.61   14.22
  -4  -8   4  618.70   26.90
  -4  -8   4  575.85   23.96
  -4  -8   5  442.85   22.34
  -4  -8   5  451.03   21.08
  -4  -8   6   69.89    7.57
  -4  -8   6   60.02    7.28
  -4  -8   7  196.36   13.57
  -4  -8   7  211.54   14.23
  -4  -8   8   61.98    7.61
  -4  -8   9    4.74    2.37
  -4  -8  10   39.94    6.47
  -4  -7  -4  806.04   33.52
  -4  -7  -3   76.43    8.51
  -4  -7  -2  294.78   17.36
  -4  -7  -2  247.92   14.37
  -4  -7  -2  283.81   11.10
  -4  -7  -1   39.72    5.19
  -4  -7  -1   27.99    3.62
  -4  -7  -1   34.41    5.63
  -4  -7  -1   31.25    3.38
  -4  -7   0   97.08    7.52
  -4  -7   0   93.52    8.28
  -4  -7   0  112.13    7.29
  -4  -7   0  103.26    9.56
  -4  -7   1  429.84   17.38
  -4  -7   1  411.75   19.32
  -4  -7   1  415.20   21.12
  -4  -7   1  424.64   18.58
  -4  -7   1  437.13   19.33
  -4  -7   2   72.36    6.43
  -4  -7   2   75.92    8.00
  -4  -7   2   66.68    6.79
  -4  -7   2   77.79    7.57
  -4  -7   2   78.90    6.90
  -4  -7   3   29.40    3.86
  -4  -7   3   22.67    4.05
  -4  -7   3   28.43    4.51
  -4  -7   3   24.06    4.60
  -4  -7   3   29.19    4.27
  -4  -7   4  422.48   20.34
  -4  -7   4  416.83   19.84
  -4  -7   4  414.25   20.61
  -4  -7   4  429.15   18.94
  -4  -7   4  426.29   16.87
  -4  -7   5  562.22   24.54
  -4  -7   5  564.95   25.17
  -4  -7   6    7.29    2.20
  -4  -7   6    8.57    3.12
  -4  -7   7  167.39   11.74
  -4  -7   8   29.22    4.96
  -4  -7   9    3.58    2.05
  -4  -7  10   21.38    4.49
  -4  -7  11  253.65   16.69
  -4  -6  -6   22.32    4.59
  -4  -6  -5    6.36    2.52
  -4  -6  -5    3.74    2.03
  -4  -6  -4   87.72    7.49
  -4  -6  -4   79.96    8.01
  -4  -6  -3  119.21   10.23
  -4  -6  -3  114.00    9.87
  -4  -6  -3  118.48    8.51
  -4  -6  -3  108.25    4.86
  -4  -6  -3  103.67    9.27
  -4  -6  -2  164.46   10.49
  -4  -6  -2  196.80   12.86
  -4  -6  -2  180.81   12.36
  -4  -6  -2  178.70    7.81
  -4  -6  -2  172.19   12.19
  -4  -6  -1  102.43    7.87
  -4  -6  -1  100.29    8.62
  -4  -6  -1   94.44    8.71
  -4  -6  -1   91.66    5.86
  -4  -6  -1   96.54    6.44
  -4  -6  -1   95.14    8.71
  -4  -6   0   11.39    3.27
  -4  -6   0   14.06    2.86
  -4  -6   0   15.29    2.66
  -4  -6   0   15.50    3.07
  -4  -6   0   15.59    3.40
  -4  -6   0   13.68    2.45
  -4  -6   1   89.04    6.51
  -4  -6   1  104.17    8.02
  -4  -6   1   95.51    8.61
  -4  -6   1   88.94    6.99
  -4  -6   1   83.50    8.30
  -4  -6   1   93.56    7.56
  -4  -6   2  118.38    9.80
  -4  -6   2  125.33    8.83
  -4  -6   2  121.63    8.00
  -4  -6   2  122.08    8.44
  -4  -6   2  122.27    8.93
  -4  -6   2  118.84    9.62
  -4  -6   3  243.22   14.93
  -4  -6   3  276.55   14.40
  -4  -6   3  254.97   12.47
  -4  -6   3  258.84   13.88
  -4  -6   3  280.69   13.38
  -4  -6   4  244.06   14.67
  -4  -6   4  228.28   11.09
  -4  -6   4  235.89   13.23
  -4  -6   4  235.57   13.68
  -4  -6   4  226.74   12.58
  -4  -6   5 1340.27   43.93
  -4  -6   5 1466.01   45.81
  -4  -6   5 1378.19   45.75
  -4  -6   5 1410.33   39.36
  -4  -6   5 1448.44   43.61
  -4  -6   6   79.76    7.71
  -4  -6   6   85.81    8.36
  -4  -6   6   89.26    5.49
  -4  -6   6   81.22    8.22
  -4  -6   6   95.58    7.97
  -4  -6   7  198.48   13.53
  -4  -6   7  189.85   12.71
  -4  -6   7  197.00   12.44
  -4  -6   7  190.26   12.48
  -4  -6   7  202.11    8.06
  -4  -6   8  282.39   15.96
  -4  -6   8  269.95   15.44
  -4  -6   8  301.32   16.29
  -4  -6   9    2.19    1.49
  -4  -6   9    1.11    1.01
  -4  -6  10  488.18   21.79
  -4  -6  10  476.17   22.00
  -4  -6  11  476.84   23.31
  -4  -6  11  461.63   21.06
  -4  -6  11  487.08   21.73
  -4  -6  12  324.91   19.14
  -4  -5  -7   18.84    4.11
  -4  -5  -6   32.67    5.46
  -4  -5  -6   36.78    4.80
  -4  -5  -6   43.77    5.98
  -4  -5  -5  764.54   28.32
  -4  -5  -5  757.71   29.82
  -4  -5  -4  542.26   23.94
  -4  -5  -4  503.39   22.26
  -4  -5  -4  516.74   19.52
  -4  -5  -4  514.72   21.58
  -4  -5  -3  314.48   14.21
  -4  -5  -3  331.35    9.76
  -4  -5  -3  300.73   15.77
  -4  -5  -3  340.18   17.43
  -4  -5  -3  348.85   17.23
  -4  -5  -2  553.10   23.00
  -4  -5  -2  573.53   17.04
  -4  -5  -2  601.79   23.94
  -4  -5  -2  545.41   23.33
  -4  -5  -2  542.20   20.38
  -4  -5  -1  358.05   16.88
  -4  -5  -1  304.96   15.96
  -4  -5  -1  307.05   14.14
  -4  -5  -1  327.90   12.15
  -4  -5  -1  364.78   17.23
  -4  -5   0  282.19   14.91
  -4  -5   0  261.52   11.99
  -4  -5   0  258.92   13.78
  -4  -5   0  272.81   11.29
  -4  -5   0  264.07   14.27
  -4  -5   0  286.07   13.30
  -4  -5   1  440.45   17.71
  -4  -5   1  435.47   16.16
  -4  -5   1  413.64   17.84
  -4  -5   1  443.94   17.25
  -4  -5   1  429.87   19.41
  -4  -5   2  621.69   22.68
  -4  -5   2  607.87   22.70
  -4  -5   2  635.06   24.88
  -4  -5   2  625.52   21.49
  -4  -5   2  625.67   22.39
  -4  -5   3    0.75    0.81
  -4  -5   3    2.29    1.24
  -4  -5   3    1.71    1.39
  -4  -5   3    2.80    1.17
  -4  -5   3    1.05    0.97
  -4  -5   4  934.86   31.71
  -4  -5   4  915.79   28.38
  -4  -5   4  917.25   31.02
  -4  -5   4  858.25   29.50
  -4  -5   5  449.99   19.46
  -4  -5   5  489.44   20.67
  -4  -5   5  472.40   16.77
  -4  -5   5  450.54   18.94
  -4  -5   5  518.11   21.36
  -4  -5   6    4.65    1.90
  -4  -5   6    5.90    1.41
  -4  -5   6    3.66    1.37
  -4  -5   6    2.38    1.29
  -4  -5   6    4.22    2.11
  -4  -5   7   59.92    6.51
  -4  -5   7   59.95    6.43
  -4  -5   7   67.22    7.23
  -4  -5   7   58.80    4.15
  -4  -5   7   71.02    6.90
  -4  -5   8  120.62    5.66
  -4  -5   8  116.54    9.27
  -4  -5   8  119.58   10.16
  -4  -5   8  134.41    9.62
  -4  -5   8  121.81    9.62
  -4  -5   9  148.24   11.03
  -4  -5   9  140.81   10.71
  -4  -5   9  153.58    5.61
  -4  -5   9  167.95   12.37
  -4  -5   9  150.15   10.26
  -4  -5   9  142.12   10.10
  -4  -5  10   63.05    6.40
  -4  -5  10   61.90    7.18
  -4  -5  10   54.96    6.16
  -4  -5  11  791.08   28.72
  -4  -5  11  787.73   29.85
  -4  -5  11  872.91   32.78
  -4  -5  12   -1.39    1.75
  -4  -5  12   -0.98    1.59
  -4  -5  13  145.18   12.29
  -4  -4  -8   62.04    6.98
  -4  -4  -7  235.43   15.46
  -4  -4  -7  209.57   11.21
  -4  -4  -7  210.70   13.23
  -4  -4  -6  165.10   11.04
  -4  -4  -6  146.89   11.59
  -4  -4  -6  145.68    9.35
  -4  -4  -5   84.42    7.55
  -4  -4  -5   97.14    9.00
  -4  -4  -5   90.33    7.15
  -4  -4  -4 1941.30   51.60
  -4  -4  -4 2029.53   56.60
  -4  -4  -4 1912.66   54.66
  -4  -4  -3 1247.08   39.27
  -4  -4  -3 1280.86   40.88
  -4  -4  -3 1290.47   35.78
  -4  -4  -3 1249.65   29.93
  -4  -4  -3 1204.12   29.93
  -4  -4  -3 1244.33   38.46
  -4  -4  -2 2798.64   76.68
  -4  -4  -2 2841.76   73.02
  -4  -4  -2 2727.72   75.88
  -4  -4  -2 3041.32   78.56
  -4  -4  -2 2845.59   69.11
  -4  -4  -1    7.88    1.38
  -4  -4  -1    3.92    1.33
  -4  -4  -1    5.82    1.91
  -4  -4  -1    6.85    2.11
  -4  -4  -1    8.07    2.19
  -4  -4   0  179.96   10.59
  -4  -4   0  169.97   10.51
  -4  -4   0  167.98    9.08
  -4  -4   0  183.02    8.26
  -4  -4   1  440.19   18.01
  -4  -4   1  434.73   17.11
  -4  -4   1  443.08   15.91
  -4  -4   1  455.50   18.97
  -4  -4   2  779.17   26.15
  -4  -4   2  760.12   27.56
  -4  -4   2  789.92   26.18
  -4  -4   2  849.24   25.52
  -4  -4   2  810.91   26.29
  -4  -4   3 1129.47   34.58
  -4  -4   3 1187.43   37.22
  -4  -4   3 1173.12   36.09
  -4  -4   3 1205.52   35.00
  -4  -4   3 1216.80   36.11
  -4  -4   4  420.79   17.88
  -4  -4   4  387.29   16.06
  -4  -4   4  389.26   17.19
  -4  -4   4  431.58   15.68
  -4  -4   4  400.43   16.90
  -4  -4   5  154.71    8.00
  -4  -4   5  147.21    9.41
  -4  -4   5  168.10    9.66
  -4  -4   5  151.08    9.70
  -4  -4   5  132.12    9.42
  -4  -4   6  844.31   27.94
  -4  -4   6  831.37   28.26
  -4  -4   6  750.76   23.74
  -4  -4   6  713.34   26.31
  -4  -4   6  794.10   28.48
  -4  -4   7   17.91    3.15
  -4  -4   7   22.19    3.75
  -4  -4   7   24.81    3.94
  -4  -4   7   19.15    3.19
  -4  -4   7   21.92    3.56
  -4  -4   8  954.73   27.87
  -4  -4   8 1053.20   35.42
  -4  -4   8 1034.46   33.93
  -4  -4   8  973.00   33.80
  -4  -4   8  949.67   32.13
  -4  -4   8  913.60   31.36
  -4  -4   9  120.19   10.04
  -4  -4   9  124.92    9.81
  -4  -4   9  124.98    6.76
  -4  -4   9  126.88    9.58
  -4  -4   9  121.55    8.99
  -4  -4   9  140.63    9.10
  -4  -4  10    7.63    2.54
  -4  -4  10    3.23    1.42
  -4  -4  10    3.22    1.23
  -4  -4  10    4.76    2.24
  -4  -4  10    2.66    0.76
  -4  -4  11  373.43   15.79
  -4  -4  11  382.73   19.22
  -4  -4  11  369.71   13.33
  -4  -4  11  358.26   12.32
  -4  -4  11  365.48   17.68
  -4  -4  12    2.30    1.28
  -4  -4  12    3.31    2.24
  -4  -4  13    7.73    2.80
  -4  -3  -9   14.99    3.25
  -4  -3  -9   23.27    4.87
  -4  -3  -8   44.91    5.39
  -4  -3  -8   37.42    5.81
  -4  -3  -7   17.18    3.18
  -4  -3  -7   10.79    2.88
  -4  -3  -7   16.56    2.74
  -4  -3  -6   15.19    3.49
  -4  -3  -6   17.21    2.73
  -4  -3  -6   15.87    3.01
  -4  -3  -5   30.84    4.75
  -4  -3  -5   39.59    4.63
  -4  -3  -5   36.47    4.12
  -4  -3  -4   34.82    4.02
  -4  -3  -4   28.51    4.02
  -4  -3  -4   30.54    2.95
  -4  -3  -4   28.36    4.39
  -4  -3  -3  180.54   10.38
  -4  -3  -3  174.86   11.12
  -4  -3  -3  181.82   10.01
  -4  -3  -3  176.85    5.08
  -4  -3  -3  179.15    8.23
  -4  -3  -3  183.93    5.20
  -4  -3  -2  110.34    4.77
  -4  -3  -2  110.60    6.28
  -4  -3  -2  104.50    7.44
  -4  -3  -2  103.54    8.17
  -4  -3  -2  114.97    7.73
  -4  -3  -1   53.99    3.57
  -4  -3  -1   61.29    5.81
  -4  -3  -1   50.71    4.15
  -4  -3  -1   54.50    5.25
  -4  -3   0   27.45    3.76
  -4  -3   0   36.44    3.56
  -4  -3   0   37.28    4.21
  -4  -3   0   22.63    2.46
  -4  -3   1    8.64    2.18
  -4  -3   1   10.19    1.96
  -4  -3   1    8.04    1.85
  -4  -3   2 1383.15   40.78
  -4  -3   2 1458.62   40.56
  -4  -3   2 1470.86   42.11
  -4  -3   3  247.39   11.49
  -4  -3   3  250.79   12.21
  -4  -3   3  261.77   12.01
  -4  -3   4  223.71   10.45
  -4  -3   4  202.61   10.83
  -4  -3   4  200.70   10.77
  -4  -3   5  654.14   21.41
  -4  -3   5  639.76   22.53
  -4  -3   5  593.07   22.45
  -4  -3   6  653.90   23.41
  -4  -3   6  642.49   21.87
  -4  -3   6  653.64   23.16
  -4  -3   7 2355.55   65.35
  -4  -3   7 2383.81   63.12
  -4  -3   7 2363.62   66.45
  -4  -3   7 2534.85   64.98
  -4  -3   8  815.34   28.82
  -4  -3   8  778.00   27.43
  -4  -3   8  800.22   26.20
  -4  -3   8  779.44   25.36
  -4  -3   9  210.14   12.08
  -4  -3   9  241.61   13.56
  -4  -3   9  237.21   11.42
  -4  -3   9  214.72   10.97
  -4  -3  10   35.46    3.99
  -4  -3  10   33.57    4.07
  -4  -3  10   23.60    4.14
  -4  -3  10   39.51    4.96
  -4  -3  11  197.63    9.35
  -4  -3  11  212.12   11.29
  -4  -3  11  201.57    9.62
  -4  -3  11  192.39   12.13
  -4  -3  12  318.00   16.97
  -4  -3  12  350.70   13.66
  -4  -3  12  325.32   15.20
  -4  -3  13   26.01    4.81
  -4  -2 -10  226.69   15.44
  -4  -2 -10  233.78   12.62
  -4  -2  -9  479.80   19.51
  -4  -2  -9  495.06   23.55
  -4  -2  -8  328.60   14.80
  -4  -2  -8  313.16   17.65
  -4  -2  -7   94.96    8.83
  -4  -2  -7   98.96    7.21
  -4  -2  -6   24.88    4.15
  -4  -2  -6   10.24    2.15
  -4  -2  -5  224.49   13.11
  -4  -2  -5  213.17   10.93
  -4  -2  -5  227.56   10.70
  -4  -2  -4    1.20    1.01
  -4  -2  -4    3.20    1.32
  -4  -2  -4    0.59    0.55
  -4  -2  -4    1.89    0.60
  -4  -2  -3  941.36   25.82
  -4  -2  -3  925.51   31.51
  -4  -2  -3  939.42   29.25
  -4  -2  -3  959.46   29.24
  -4  -2  -3  941.42   23.20
  -4  -2  -3  953.20   23.37
  -4  -2  -2    7.46    1.37
  -4  -2  -2    4.29    1.81
  -4  -2  -2    7.23    1.66
  -4  -2  -2    6.40    0.97
  -4  -2  -1   20.45    2.91
  -4  -2  -1   18.11    2.92
  -4  -2  -1   24.07    2.13
  -4  -2  -1   20.77    2.33
  -4  -2   0   80.15    6.03
  -4  -2   0   86.79    5.29
  -4  -2   0   79.47    6.26
  -4  -2   1  243.45   10.60
  -4  -2   1  279.36   12.17
  -4  -2   2  952.20   28.00
  -4  -2   2  889.44   28.75
  -4  -2   2  927.09   28.65
  -4  -2   3    9.59    2.12
  -4  -2   3    8.48    1.94
  -4  -2   3    9.63    1.95
  -4  -2   4  290.80   12.68
  -4  -2   4  287.28   12.75
  -4  -2   4  271.54   12.45
  -4  -2   4  281.93   12.44
  -4  -2   5    6.93    1.72
  -4  -2   5    9.24    1.71
  -4  -2   5    2.05    1.02
  -4  -2   5    1.72    0.97
  -4  -2   6 1289.28   38.31
  -4  -2   6 1292.68   37.33
  -4  -2   6 1297.79   39.29
  -4  -2   6 1321.27   38.79
  -4  -2   7  143.00    8.95
  -4  -2   7  145.63    9.61
  -4  -2   7  164.33    8.72
  -4  -2   7  158.17    9.62
  -4  -2   7  163.63    8.10
  -4  -2   8  628.62   22.68
  -4  -2   8  584.79   22.34
  -4  -2   8  557.02   22.65
  -4  -2   8  603.85   20.00
  -4  -2   8  600.79   20.26
  -4  -2   9  821.58   30.40
  -4  -2   9  913.34   27.39
  -4  -2   9  852.47   29.89
  -4  -2   9  872.91   29.75
  -4  -2  10  352.34   14.32
  -4  -2  10  376.99   17.29
  -4  -2  10  333.35   16.12
  -4  -2  11  344.34   14.62
  -4  -2  11  311.49   16.32
  -4  -2  11  340.49   16.65
  -4  -2  12  124.00    8.39
  -4  -2  12  133.21   10.15
  -4  -2  12  131.64   10.26
  -4  -2  12  149.38    9.14
  -4  -2  13  189.23   12.61
  -4  -2  13  181.56   10.71
  -4  -1 -11   63.16    7.87
  -4  -1 -10  345.20   14.67
  -4  -1 -10  375.29   19.56
  -4  -1  -9   13.90    3.52
  -4  -1  -9   17.48    2.63
  -4  -1  -8    9.41    1.97
  -4  -1  -8    9.94    2.88
  -4  -1  -7 2522.15   70.70
  -4  -1  -7 2459.60   64.47
  -4  -1  -6  320.08   13.08
  -4  -1  -6  358.61   17.18
  -4  -1  -5  396.51   17.93
  -4  -1  -5  397.15   14.82
  -4  -1  -4 2730.67   62.41
  -4  -1  -4 2556.29   67.08
  -4  -1  -4 2642.30   71.42
  -4  -1  -4 2725.15   61.81
  -4  -1  -3  134.89    5.29
  -4  -1  -3  143.32    7.82
  -4  -1  -3  132.20    8.90
  -4  -1  -3  136.01    5.06
  -4  -1  -2 2079.18   54.66
  -4  -1  -2 2143.79   57.25
  -4  -1  -2 2066.95   51.05
  -4  -1  -2 2034.40   50.56
  -4  -1  -1 2375.62   64.89
  -4  -1  -1 2499.12   59.75
  -4  -1  -1 2394.90   60.07
  -4  -1  -1 2380.08   62.83
  -4  -1   0 2570.52   63.98
  -4  -1   0 2492.98   63.27
  -4  -1   0 2611.59   68.09
  -4  -1   0 2632.57   66.30
  -4  -1   1   73.16    5.92
  -4  -1   1   74.85    4.89
  -4  -1   1   70.14    5.28
  -4  -1   1   85.89    4.97
  -4  -1   2 1861.82   52.11
  -4  -1   2 1888.33   49.87
  -4  -1   2 1932.55   50.80
  -4  -1   3  773.25   24.92
  -4  -1   3  714.01   22.74
  -4  -1   3  692.53   22.61
  -4  -1   3  690.59   23.00
  -4  -1   4  112.36    6.64
  -4  -1   4  128.02    7.64
  -4  -1   4  126.80    8.13
  -4  -1   4  119.18    6.96
  -4  -1   4  119.92    7.38
  -4  -1   5    6.54    1.65
  -4  -1   5    4.15    1.18
  -4  -1   5    7.67    1.69
  -4  -1   5    5.12    1.54
  -4  -1   6 1256.11   37.76
  -4  -1   6 1299.56   37.80
  -4  -1   6 1193.77   35.39
  -4  -1   6 1241.08   38.47
  -4  -1   7   19.77    2.86
  -4  -1   7   17.11    2.94
  -4  -1   7   22.34    3.51
  -4  -1   7   17.80    3.21
  -4  -1   8  236.77   12.56
  -4  -1   8  234.62   11.34
  -4  -1   8  228.47   12.74
  -4  -1   9    8.86    2.43
  -4  -1   9    7.23    1.97
  -4  -1   9    6.37    1.96
  -4  -1  10  572.80   21.40
  -4  -1  10  588.68   23.37
  -4  -1  11  266.22   15.36
  -4  -1  11  302.31   14.53
  -4  -1  12   46.40    5.45
  -4  -1  12   40.67    5.07
  -4  -1  13   58.48    6.42
  -4   0 -11   14.05    3.62
  -4   0 -10  621.79   19.45
  -4   0 -10  624.55   26.17
  -4   0  -9  337.45   17.62
  -4   0  -9  347.05   12.62
  -4   0  -8  105.50    8.82
  -4   0  -8  109.30    5.97
  -4   0  -7    9.16    1.65
  -4   0  -7    5.23    1.91
  -4   0  -6    2.97    1.33
  -4   0  -6    2.32    0.92
  -4   0  -5  196.65    8.45
  -4   0  -5  186.99   11.06
  -4   0  -5  193.20    6.80
  -4   0  -4 1392.83   42.43
  -4   0  -4 1441.39   36.27
  -4   0  -3    3.19    0.77
  -4   0  -3    3.96    0.59
  -4   0  -3    5.33    1.69
  -4   0  -2  785.48   27.18
  -4   0  -2  851.78   22.90
  -4   0  -2  828.88   21.98
  -4   0  -1 2378.58   58.29
  -4   0  -1 2374.44   58.76
  -4   0  -1 2320.85   63.62
  -4   0   0  150.07    9.03
  -4   0   0  142.69    7.30
  -4   0   0  161.30    6.98
  -4   0   0  138.42    6.65
  -4   0   1  145.52    8.98
  -4   0   1  174.16    8.31
  -4   0   1  164.80    7.65
  -4   0   1  152.90    7.30
  -4   0   2  750.10   25.73
  -4   0   2  762.41   22.95
  -4   0   2  804.15   23.64
  -4   0   2  726.87   23.56
  -4   0   3    6.13    1.41
  -4   0   3    5.91    1.40
  -4   0   3    4.48    1.35
  -4   0   3    3.93    1.31
  -4   0   4  825.96   25.27
  -4   0   4  795.61   24.67
  -4   0   4  751.44   26.96
  -4   0   4  774.70   25.46
  -4   0   5  934.68   29.92
  -4   0   5  990.68   31.07
  -4   0   6    3.09    1.18
  -4   0   6    2.03    1.34
  -4   0   6    3.91    1.46
  -4   0   7  723.95   26.22
  -4   0   7  714.01   25.07
  -4   0   8  897.87   30.13
  -4   0   8  837.85   29.51
  -4   0   8  827.63   28.21
  -4   0   8  825.71   28.10
  -4   0   9  534.88   20.94
  -4   0   9  495.30   20.14
  -4   0   9  512.83   21.70
  -4   0   9  515.15   21.60
  -4   0  10    0.19    0.97
  -4   0  10    2.06    1.34
  -4   0  10    0.95    1.27
  -4   0  10    3.82    1.87
  -4   0  11    3.35    1.80
  -4   0  11    2.84    1.73
  -4   0  12  164.01   11.50
  -4   0  12  145.35   10.94
  -4   1 -12   15.97    3.93
  -4   1 -11   55.17    6.81
  -4   1 -10   24.53    4.36
  -4   1  -9  463.25   20.58
  -4   1  -9  461.12   12.60
  -4   1  -8  441.97   19.70
  -4   1  -8  447.76   12.78
  -4   1  -7  428.40   18.72
  -4   1  -7  418.25   13.53
  -4   1  -7  432.41   12.63
  -4   1  -6    7.96    1.32
  -4   1  -6   10.05    2.36
  -4   1  -6    8.56    1.13
  -4   1  -5  331.87   10.85
  -4   1  -5  330.24   11.59
  -4   1  -5  321.93   15.04
  -4   1  -4  289.04   14.03
  -4   1  -4  306.21   11.03
  -4   1  -4  324.01   10.63
  -4   1  -3  237.73   12.28
  -4   1  -3  247.21    9.34
  -4   1  -3  256.71    7.72
  -4   1  -3  256.04    7.60
  -4   1  -3  271.34    9.90
  -4   1  -2  712.02   25.13
  -4   1  -2  733.98   21.35
  -4   1  -2  739.71   21.48
  -4   1  -1 2109.10   54.55
  -4   1  -1 2099.78   54.74
  -4   1   0 1290.27   32.16
  -4   1   0  905.19   33.16
  -4   1   1  205.74   11.24
  -4   1   1  197.94    9.75
  -4   1   1  214.57    9.20
  -4   1   1  222.07    9.83
  -4   1   2  398.42   15.11
  -4   1   2  405.53   17.34
  -4   1   2  394.88   14.48
  -4   1   2  403.44   15.42
  -4   1   3  270.56   13.65
  -4   1   3  230.38   10.63
  -4   1   3  269.60   11.88
  -4   1   3  265.46   11.92
  -4   1   4    8.94    1.89
  -4   1   4    9.87    2.09
  -4   1   4   11.82    2.37
  -4   1   5  684.83   24.60
  -4   1   5  706.43   24.45
  -4   1   5  760.12   24.17
  -4   1   6 1358.55   40.62
  -4   1   6 1293.02   40.59
  -4   1   6 1397.09   39.69
  -4   1   7  417.95   18.03
  -4   1   7  379.25   16.96
  -4   1   7  384.86   16.19
  -4   1   8  510.68   20.84
  -4   1   8  517.09   19.97
  -4   1   8  474.26   20.89
  -4   1   9  328.29   16.60
  -4   1   9  330.25   15.69
  -4   1  10  500.47   21.70
  -4   1  10  455.79   19.80
  -4   1  11   83.69    8.21
  -4   1  12  118.29   10.29
  -4   2 -12   13.66    3.29
  -4   2 -11  147.23   10.65
  -4   2 -10   23.93    4.09
  -4   2  -9  465.11   20.14
  -4   2  -8   46.70    5.40
  -4   2  -8   48.74    4.02
  -4   2  -7  707.65   25.85
  -4   2  -7  732.24   22.42
  -4   2  -6   23.53    2.74
  -4   2  -6   20.32    3.32
  -4   2  -5  644.33   23.75
  -4   2  -5  657.12   20.84
  -4   2  -5  669.77   17.69
  -4   2  -4  292.76   13.89
  -4   2  -4  290.97    8.57
  -4   2  -4  284.72   11.40
  -4   2  -4  283.91    9.61
  -4   2  -3  307.32   14.77
  -4   2  -3  342.09   11.49
  -4   2  -3  336.77   10.60
  -4   2  -3  354.76   12.94
  -4   2  -2 1216.35   31.46
  -4   2  -2 1181.35   32.30
  -4   2  -2 1191.82   33.34
  -4   2  -2 1181.20   36.79
  -4   2  -1    4.16    1.57
  -4   2  -1    5.42    1.25
  -4   2  -1    2.85    1.00
  -4   2   0 1397.33   42.41
  -4   2   0 1401.78   39.90
  -4   2   0 1446.50   38.91
  -4   2   0 1396.61   38.71
  -4   2   1  835.91   28.70
  -4   2   1  821.11   25.56
  -4   2   1  821.12   26.15
  -4   2   1  813.70   25.02
  -4   2   2 3106.59   79.58
  -4   2   2 3224.63   83.46
  -4   2   2 3024.76   79.97
  -4   2   3  155.43    9.27
  -4   2   3  166.95    8.73
  -4   2   3  157.91    9.09
  -4   2   4  110.64    7.13
  -4   2   4  112.51    7.99
  -4   2   4  124.47    8.25
  -4   2   5  273.38   13.70
  -4   2   5  297.22   14.28
  -4   2   5  286.23   12.91
  -4   2   6  112.72    8.42
  -4   2   6  104.36    7.35
  -4   2   6  111.20    8.51
  -4   2   7   50.22    5.72
  -4   2   7   40.51    5.15
  -4   2   7   43.10    4.84
  -4   2   8  975.05   34.20
  -4   2   8  960.62   34.37
  -4   2   8  998.90   32.28
  -4   2   9   44.04    5.71
  -4   2   9   39.19    4.76
  -4   2  10   81.75    8.31
  -4   2  10   63.48    6.60
  -4   2  11  345.39   18.95
  -4   3 -12  481.84   21.01
  -4   3 -11   57.98    6.28
  -4   3 -10   19.23    3.53
  -4   3  -9 1115.18   33.70
  -4   3  -9 1156.62   36.73
  -4   3  -8  566.64   20.02
  -4   3  -8  584.10   22.36
  -4   3  -7  727.67   23.39
  -4   3  -7  664.36   24.78
  -4   3  -6  385.30   16.91
  -4   3  -6  406.45   11.13
  -4   3  -6  378.67   15.23
  -4   3  -5  297.13    8.94
  -4   3  -5  298.10    9.70
  -4   3  -5  325.55   13.20
  -4   3  -5  298.75   14.34
  -4   3  -4  289.57    9.85
  -4   3  -4  282.56   14.00
  -4   3  -4  292.01   10.08
  -4   3  -4  286.03   12.35
  -4   3  -3  681.64   22.36
  -4   3  -3  672.07   20.08
  -4   3  -3  732.51   20.37
  -4   3  -2  418.79   18.16
  -4   3  -2  449.77   14.88
  -4   3  -2  429.97   14.94
  -4   3  -2  449.46   16.31
  -4   3  -1   33.80    3.35
  -4   3  -1   34.52    3.88
  -4   3  -1   37.85    3.85
  -4   3  -1   37.14    3.40
  -4   3  -1   30.94    4.32
  -4   3   0 1793.27   54.19
  -4   3   0 1831.58   49.69
  -4   3   0 2007.14   51.20
  -4   3   0 1845.68   51.66
  -4   3   0 1886.03   50.49
  -4   3   1   73.71    6.11
  -4   3   1   80.19    5.88
  -4   3   1   59.69    5.08
  -4   3   2   44.03    4.62
  -4   3   2   35.56    4.25
  -4   3   2   45.44    4.36
  -4   3   3    5.33    1.53
  -4   3   3    8.58    1.97
  -4   3   3    6.57    1.89
  -4   3   4  126.94    8.92
  -4   3   4  121.18    8.83
  -4   3   4  125.73    8.01
  -4   3   5   18.48    3.59
  -4   3   5   25.25    3.93
  -4   3   5   25.16    3.52
  -4   3   6  457.16   20.32
  -4   3   6  469.55   18.65
  -4   3   6  457.48   20.38
  -4   3   7  165.89   11.64
  -4   3   7  167.54   10.31
  -4   3   7  187.97   12.33
  -4   3   8  115.78    9.76
  -4   3   8  100.57    7.97
  -4   3   9  373.85   19.77
  -4   3   9  361.00   17.08
  -4   3  10  151.43   12.24
  -4   4 -12  295.09   14.82
  -4   4 -11   81.87    7.16
  -4   4 -10   29.74    3.98
  -4   4 -10   22.63    3.42
  -4   4  -9  481.63   19.61
  -4   4  -9  483.38   19.20
  -4   4  -8   51.66    2.81
  -4   4  -8   42.51    4.92
  -4   4  -8   45.58    4.95
  -4   4  -7  684.12   19.51
  -4   4  -7  716.37   25.17
  -4   4  -7  675.04   24.05
  -4   4  -6  908.95   29.74
  -4   4  -6  902.68   30.67
  -4   4  -6  942.17   25.80
  -4   4  -5    5.77    1.27
  -4   4  -5    7.01    1.93
  -4   4  -5    5.96    1.02
  -4   4  -5    6.70    1.91
  -4   4  -4  214.27   11.17
  -4   4  -4  226.01    8.78
  -4   4  -4  214.36   12.17
  -4   4  -4  227.47    9.54
  -4   4  -3 1791.49   50.56
  -4   4  -3 1863.03   48.26
  -4   4  -3 1851.88   53.23
  -4   4  -3 1773.82   47.36
  -4   4  -2    8.39    1.90
  -4   4  -2    8.96    2.03
  -4   4  -2   12.61    2.05
  -4   4  -2   10.01    1.89
  -4   4  -2   10.99    2.58
  -4   4  -1  116.69    7.08
  -4   4  -1  118.53    9.04
  -4   4  -1  119.02    7.73
  -4   4  -1  119.09    7.25
  -4   4  -1  104.20    7.49
  -4   4   0  290.76   15.17
  -4   4   0  289.04   12.78
  -4   4   0  266.43   13.11
  -4   4   0  270.56   12.29
  -4   4   0  275.13   12.77
  -4   4   1 1388.89   41.13
  -4   4   1 1375.90   40.15
  -4   4   1 1283.26   38.91
  -4   4   1 1333.40   39.47
  -4   4   2 1017.82   33.66
  -4   4   2 1039.42   32.54
  -4   4   2 1013.30   33.01
  -4   4   2 1034.66   32.29
  -4   4   3   27.29    3.79
  -4   4   3   25.97    3.71
  -4   4   3   26.65    4.04
  -4   4   3   26.55    3.87
  -4   4   4    2.29    0.98
  -4   4   4    1.93    1.39
  -4   4   4    4.28    1.95
  -4   4   4    5.52    1.98
  -4   4   5  130.96    9.46
  -4   4   5  111.85    9.29
  -4   4   5  132.91    8.86
  -4   4   5  106.53    9.20
  -4   4   6  532.92   23.47
  -4   4   6  530.86   22.29
  -4   4   6  498.80   20.61
  -4   4   7  215.39   14.20
  -4   4   7  207.78   13.23
  -4   4   7  210.58   12.19
  -4   4   8   59.43    6.42
  -4   4   8   67.49    7.44
  -4   4   8   65.40    7.86
  -4   4   9  192.47   14.35
  -4   4   9  208.95   14.12
  -4   5 -11   50.75    5.15
  -4   5 -10   86.24    7.05
  -4   5 -10   81.89    7.35
  -4   5  -9  150.43    6.80
  -4   5  -9  145.91   10.03
  -4   5  -9  154.69    9.61
  -4   5  -8   24.52    2.68
  -4   5  -8   15.44    3.10
  -4   5  -8   23.58    3.65
  -4   5  -7   88.34    7.46
  -4   5  -7   88.70    7.22
  -4   5  -7   89.24    5.72
  -4   5  -6  186.03    8.98
  -4   5  -6  186.75   11.23
  -4   5  -6  194.49   11.35
  -4   5  -5  338.82   13.54
  -4   5  -5  340.63   11.82
  -4   5  -5  322.94   15.85
  -4   5  -5  361.78   16.24
  -4   5  -4  916.97   31.54
  -4   5  -4  899.58   26.26
  -4   5  -4  915.26   30.47
  -4   5  -4  870.82   27.48
  -4   5  -3  640.54   25.22
  -4   5  -3  711.73   22.67
  -4   5  -3  617.02   20.89
  -4   5  -3  619.65   22.68
  -4   5  -3  651.78   23.90
  -4   5  -2  132.60    7.87
  -4   5  -2  122.13    8.45
  -4   5  -2  133.06    8.97
  -4   5  -2  140.09    8.35
  -4   5  -2  141.36   10.35
  -4   5  -1  198.53   10.56
  -4   5  -1  210.97   11.59
  -4   5  -1  195.51   11.20
  -4   5  -1  187.59   10.24
  -4   5   0 1091.39   36.86
  -4   5   0 1177.32   36.45
  -4   5   0 1135.24   36.06
  -4   5   1  368.61   16.54
  -4   5   1  398.48   17.29
  -4   5   1  384.01   16.78
  -4   5   1  366.86   17.33
  -4   5   2 1107.34   36.56
  -4   5   2 1056.19   34.92
  -4   5   2 1100.94   35.88
  -4   5   2 1058.09   34.54
  -4   5   3 1461.41   46.65
  -4   5   3 1500.43   46.45
  -4   5   3 1450.52   45.17
  -4   5   3 1507.34   44.82
  -4   5   4  519.91   23.27
  -4   5   4  538.13   22.44
  -4   5   4  510.43   21.16
  -4   5   4  535.84   23.01
  -4   5   5    5.04    2.01
  -4   5   5    7.90    2.79
  -4   5   5    4.18    2.24
  -4   5   6  801.81   31.95
  -4   5   6  793.62   30.36
  -4   5   6  748.17   28.30
  -4   5   7  141.75   11.22
  -4   5   7  134.14   11.74
  -4   5   8  227.03   16.00
  -4   5   8  200.18   14.20
  -4   6 -10  254.01   12.45
  -4   6 -10  248.68   10.57
  -4   6  -9  122.83    8.35
  -4   6  -9  114.26    6.98
  -4   6  -8   89.07    7.22
  -4   6  -8   90.68    6.38
  -4   6  -8   75.51    7.36
  -4   6  -7  394.10   17.69
  -4   6  -7  386.15   18.58
  -4   6  -7  419.68   16.24
  -4   6  -6  547.00   20.08
  -4   6  -6  556.90   22.43
  -4   6  -6  558.51   23.08
  -4   6  -5  477.93   20.88
  -4   6  -5  492.19   18.82
  -4   6  -5  504.36   21.19
  -4   6  -5  473.16   16.70
  -4   6  -4   24.45    4.15
  -4   6  -4   33.71    4.05
  -4   6  -4   24.47    3.93
  -4   6  -4   26.81    3.35
  -4   6  -3  288.42   16.01
  -4   6  -3  290.06   14.22
  -4   6  -3  282.08   13.69
  -4   6  -3  295.89   15.14
  -4   6  -2  109.73    9.55
  -4   6  -2  115.88    8.56
  -4   6  -2  117.16    8.47
  -4   6  -2  125.85    8.33
  -4   6  -2  131.50    9.53
  -4   6  -1   11.43    2.71
  -4   6  -1    9.83    2.55
  -4   6  -1   11.99    2.54
  -4   6  -1    9.34    2.37
  -4   6   0  839.12   30.48
  -4   6   0  864.36   30.48
  -4   6   0  870.10   30.00
  -4   6   0  836.33   29.63
  -4   6   1   25.50    4.06
  -4   6   1   21.83    4.01
  -4   6   1   30.31    4.44
  -4   6   1   28.05    4.43
  -4   6   2   78.10    7.83
  -4   6   2   73.45    7.29
  -4   6   2   71.73    7.20
  -4   6   2   79.03    7.34
  -4   6   3  244.88   15.08
  -4   6   3  238.29   14.19
  -4   6   3  220.51   14.05
  -4   6   3  258.35   14.16
  -4   6   4   51.90    6.09
  -4   6   4   62.27    7.49
  -4   6   4   61.41    7.12
  -4   6   5   24.94    4.62
  -4   6   5   31.08    5.56
  -4   6   6  512.30   24.52
  -4   6   6  546.61   26.35
  -4   6   7   23.58    5.46
  -4   6   7   32.63    5.76
  -4   7 -10  199.49   10.45
  -4   7  -9  582.88   21.56
  -4   7  -9  584.89   21.63
  -4   7  -8  563.09   22.08
  -4   7  -8  585.11   21.99
  -4   7  -7  240.92   12.65
  -4   7  -7  250.01   13.71
  -4   7  -6  302.30   14.65
  -4   7  -6  284.20   15.26
  -4   7  -5  255.91   14.78
  -4   7  -5  253.14   11.89
  -4   7  -5  248.79   13.30
  -4   7  -4  453.81   18.26
  -4   7  -4  468.41   19.41
  -4   7  -4  460.50   21.47
  -4   7  -4  449.14   19.45
  -4   7  -3  107.53    8.45
  -4   7  -3   92.49    7.82
  -4   7  -3   96.91    9.25
  -4   7  -3  101.85    7.81
  -4   7  -2  545.40   22.48
  -4   7  -2  549.38   22.49
  -4   7  -2  514.67   21.43
  -4   7  -1  311.38   16.12
  -4   7  -1  322.34   16.12
  -4   7  -1  301.95   16.12
  -4   7   0   42.54    5.70
  -4   7   0   40.64    5.62
  -4   7   0   49.32    6.00
  -4   7   1  232.74   14.57
  -4   7   1  248.34   14.72
  -4   7   1  249.49   15.14
  -4   7   2    8.36    2.69
  -4   7   2    9.33    2.82
  -4   7   3   26.51    5.03
  -4   7   3   22.82    4.48
  -4   7   4   77.14    8.93
  -4   7   4   55.02    7.21
  -4   7   5    2.30    1.87
  -4   7   5    2.16    1.97
  -4   8  -9   46.17    5.42
  -4   8  -8   68.57    6.79
  -4   8  -8   57.01    5.96
  -4   8  -7   40.32    5.29
  -4   8  -7   45.49    5.59
  -4   8  -6    8.44    2.59
  -4   8  -6   12.37    3.03
  -4   8  -5  185.16   12.11
  -4   8  -5  185.38   12.92
  -4   8  -4   55.69    5.97
  -4   8  -4   50.87    5.77
  -4   8  -4   54.02    6.37
  -4   8  -4   55.68    7.12
  -4   8  -3   94.79    8.73
  -4   8  -3   87.38    7.99
  -4   8  -3  102.46   10.04
  -4   8  -3   90.08    8.12
  -4   8  -2    4.24    2.19
  -4   8  -2    4.42    2.05
  -4   8  -2    6.30    2.29
  -4   8  -2    4.46    2.19
  -4   8  -1  335.43   18.17
  -4   8  -1  330.84   17.80
  -4   8   0  563.62   24.97
  -4   8   0  489.70   23.62
  -4   8   1  412.32   21.36
  -4   8   1  427.90   21.83
  -4   8   2   36.12    6.07
  -4   8   2   67.55    7.97
  -4   8   3  215.73   15.76
  -4   9  -6   59.38    7.13
  -4   9  -6   58.92    7.11
  -4   9  -5  342.63   18.65
  -4   9  -5  337.48   19.06
  -4   9  -4  230.54   15.05
  -4   9  -4  229.28   13.88
  -4   9  -4  234.10   16.13
  -4   9  -3  324.00   17.33
  -4   9  -3  297.36   18.99
  -4   9  -3  301.80   17.83
  -4   9  -2  111.86    9.93
  -4   9  -2  107.81   11.16
  -4   9  -2  108.41   10.27
  -4   9  -1    1.01    1.73
  -4   9  -1    5.23    2.82
  -3  -9   0  127.44    8.89
  -3  -9   0  124.67   11.85
  -3  -9   1  320.53   19.11
  -3  -9   1  273.74   16.16
  -3  -9   1  283.33   14.63
  -3  -9   2   92.63    8.09
  -3  -9   2   74.18    8.23
  -3  -9   2   89.92    9.55
  -3  -9   3    8.84    3.05
  -3  -9   3   10.81    2.83
  -3  -9   4   41.27    6.25
  -3  -9   4   42.42    5.61
  -3  -9   5   52.77    6.56
  -3  -9   5   42.09    6.25
  -3  -9   6   17.69    4.20
  -3  -9   6   12.21    3.34
  -3  -9   7  224.13   15.02
  -3  -9   7  221.77   14.83
  -3  -9   8   37.18    5.81
  -3  -9   8   31.41    5.65
  -3  -9   9    6.16    2.47
  -3  -9   9    2.59    2.19
  -3  -8  -3    3.07    1.89
  -3  -8  -2  469.58   23.82
  -3  -8  -2  470.24   17.22
  -3  -8  -1   98.76    7.69
  -3  -8  -1  107.01    7.16
  -3  -8   0  174.87   11.22
  -3  -8   0  171.74    9.95
  -3  -8   1  366.21   18.39
  -3  -8   1  405.20   20.75
  -3  -8   1  414.08   17.51
  -3  -8   2   87.71    8.40
  -3  -8   2   95.71    7.73
  -3  -8   2   91.98    9.13
  -3  -8   3   75.17    8.12
  -3  -8   3   72.73    8.01
  -3  -8   3   76.16    7.19
  -3  -8   4  130.61   10.63
  -3  -8   4   99.21    9.67
  -3  -8   4  118.87    9.33
  -3  -8   5  335.73   19.11
  -3  -8   5  309.96   16.58
  -3  -8   5  322.55   17.70
  -3  -8   6  100.39    9.08
  -3  -8   6   95.13    8.83
  -3  -8   7  331.20   17.52
  -3  -8   7  292.06   16.86
  -3  -8   8  145.66   11.06
  -3  -8   8  158.12   11.98
  -3  -8   9    3.98    2.03
  -3  -8   9    6.50    2.62
  -3  -8  10  666.64   27.05
  -3  -8  10  662.92   29.44
  -3  -8  11  272.42   15.52
  -3  -7  -5  206.18   15.05
  -3  -7  -4   21.97    4.74
  -3  -7  -4   22.86    2.26
  -3  -7  -3    1.85    1.09
  -3  -7  -3    2.61    0.92
  -3  -7  -3   -0.49    0.97
  -3  -7  -2    7.85    2.97
  -3  -7  -2   12.01    3.38
  -3  -7  -2   12.38    2.13
  -3  -7  -2   12.75    2.95
  -3  -7  -2   14.29    2.42
  -3  -7  -1    0.81    1.05
  -3  -7  -1    3.34    1.18
  -3  -7  -1    2.32    1.35
  -3  -7  -1    2.25    1.24
  -3  -7  -1    1.35    1.34
  -3  -7   0   34.37    5.40
  -3  -7   0   42.33    6.02
  -3  -7   0   32.77    4.58
  -3  -7   0   33.69    4.01
  -3  -7   0   34.80    4.51
  -3  -7   1  230.22   11.56
  -3  -7   1  219.57   14.48
  -3  -7   1  230.01   12.80
  -3  -7   1  215.13   12.76
  -3  -7   1  210.95   13.70
  -3  -7   2  337.97   16.73
  -3  -7   2  343.75   16.95
  -3  -7   2  298.28   17.50
  -3  -7   2  367.84   15.86
  -3  -7   2  350.55   17.91
  -3  -7   3    2.76    1.69
  -3  -7   3    7.93    2.39
  -3  -7   3    3.69    1.93
  -3  -7   3    3.93    2.16
  -3  -7   3    3.54    1.20
  -3  -7   4  760.07   29.49
  -3  -7   4  748.35   28.00
  -3  -7   4  703.94   28.09
  -3  -7   4  691.78   26.56
  -3  -7   5   75.77    7.10
  -3  -7   5   65.75    6.91
  -3  -7   5   61.85    7.27
  -3  -7   5   73.35    7.98
  -3  -7   5   51.19    6.02
  -3  -7   6  268.45   16.35
  -3  -7   6  281.73   15.09
  -3  -7   6  256.12   14.83
  -3  -7   6  230.67   15.21
  -3  -7   6  290.67   15.29
  -3  -7   7 1290.61   45.66
  -3  -7   7 1363.39   45.36
  -3  -7   7 1365.95   43.89
  -3  -7   7 1278.77   42.88
  -3  -7   8  516.87   22.78
  -3  -7   8  441.40   22.20
  -3  -7   9  378.66   19.47
  -3  -7   9  372.77   19.47
  -3  -7  10  314.18   17.63
  -3  -7  10  249.17   15.67
  -3  -7  11  273.65   15.03
  -3  -7  11  289.16   16.78
  -3  -7  12  195.29   14.51
  -3  -6  -7  213.68   14.98
  -3  -6  -6  115.93    9.17
  -3  -6  -5  250.32   14.41
  -3  -6  -5  309.16   17.29
  -3  -6  -4  644.35   26.23
  -3  -6  -4  717.37   28.24
  -3  -6  -4  642.73   24.64
  -3  -6  -4  674.58   18.33
  -3  -6  -3   44.82    3.37
  -3  -6  -3   46.37    5.93
  -3  -6  -3   47.17    5.84
  -3  -6  -3   48.30    5.25
  -3  -6  -3   46.91    3.35
  -3  -6  -2  193.24   12.59
  -3  -6  -2  203.89   11.51
  -3  -6  -2  198.45   12.74
  -3  -6  -2  201.40    9.32
  -3  -6  -2  213.41    8.95
  -3  -6  -1 1366.16   39.62
  -3  -6  -1 1447.22   44.96
  -3  -6  -1 1359.61   44.61
  -3  -6  -1 1373.09   41.80
  -3  -6  -1 1415.21   38.41
  -3  -6   0 1442.38   45.87
  -3  -6   0 1424.81   46.26
  -3  -6   0 1506.89   42.84
  -3  -6   0 1453.54   44.01
  -3  -6   0 1480.57   40.91
  -3  -6   0 1441.14   43.49
  -3  -6   1   15.79    3.35
  -3  -6   1   22.18    3.39
  -3  -6   1   24.80    3.71
  -3  -6   1   17.64    3.49
  -3  -6   1   20.71    3.24
  -3  -6   1   21.52    3.00
  -3  -6   2  557.25   23.08
  -3  -6   2  523.13   21.77
  -3  -6   2  525.59   20.65
  -3  -6   2  506.56   18.95
  -3  -6   2  488.30   18.95
  -3  -6   2  508.64   20.67
  -3  -6   3    0.64    0.72
  -3  -6   3    0.34    0.93
  -3  -6   3    0.87    0.95
  -3  -6   3    0.51    0.68
  -3  -6   3    1.51    0.86
  -3  -6   3    1.49    0.87
  -3  -6   4  269.51   10.95
  -3  -6   4  248.53   14.06
  -3  -6   4  248.20   14.44
  -3  -6   4  261.83   13.60
  -3  -6   4  243.03   12.76
  -3  -6   5  119.43    9.54
  -3  -6   5  104.72    9.00
  -3  -6   5   99.70    8.20
  -3  -6   5   90.48    7.48
  -3  -6   6   14.97    2.93
  -3  -6   6   15.59    3.40
  -3  -6   6   19.18    3.49
  -3  -6   6   14.39    3.50
  -3  -6   7    1.44    1.33
  -3  -6   7    3.68    1.90
  -3  -6   7    3.37    1.71
  -3  -6   7   -0.21    0.88
  -3  -6   8  212.53   13.05
  -3  -6   8  210.45   14.07
  -3  -6   8  199.56   12.49
  -3  -6   8  176.97   11.97
  -3  -6   9  353.74   18.07
  -3  -6   9  364.47   17.94
  -3  -6   9  380.70   18.79
  -3  -6  10    3.58    1.66
  -3  -6  10    3.20    1.64
  -3  -6  10    3.78    2.02
  -3  -6  11   30.01    4.58
  -3  -6  11   29.60    4.38
  -3  -6  11   30.97    5.20
  -3  -6  12   40.76    5.02
  -3  -6  12   40.50    5.21
  -3  -6  12   44.33    6.30
  -3  -6  13  185.37   14.18
  -3  -5  -8  303.30   17.50
  -3  -5  -7  307.29   16.92
  -3  -5  -7  267.29   13.50
  -3  -5  -6  112.86    9.60
  -3  -5  -6  111.63    8.20
  -3  -5  -5  391.57   17.59
  -3  -5  -5  409.19   19.35
  -3  -5  -4   22.71    1.44
  -3  -5  -4   19.37    3.43
  -3  -5  -4   20.51    3.81
  -3  -5  -4   28.40    4.55
  -3  -5  -4   25.00    3.42
  -3  -5  -3  130.31    9.19
  -3  -5  -3  119.71    9.41
  -3  -5  -3  130.45    8.17
  -3  -5  -3  128.15    9.50
  -3  -5  -3  131.73    5.45
  -3  -5  -2    6.67    2.15
  -3  -5  -2    6.15    1.37
  -3  -5  -2    7.02    2.02
  -3  -5  -2    4.63    1.70
  -3  -5  -2    7.92    2.46
  -3  -5  -2    5.14    1.09
  -3  -5  -1  393.89   17.45
  -3  -5  -1  360.36   16.22
  -3  -5  -1  363.04   15.12
  -3  -5  -1  357.39   13.79
  -3  -5  -1  370.09   13.04
  -3  -5  -1  353.92   16.67
  -3  -5   0 3226.61   88.78
  -3  -5   0 3386.39   86.84
  -3  -5   0 3425.24   85.69
  -3  -5   0 3287.01   83.97
  -3  -5   0 3345.24   89.67
  -3  -5   1 1264.89   39.23
  -3  -5   1 1272.18   37.72
  -3  -5   1 1248.70   37.30
  -3  -5   1 1243.72   37.29
  -3  -5   1 1249.19   40.00
  -3  -5   1 1318.48   36.26
  -3  -5   2  625.48   24.07
  -3  -5   2  630.33   22.58
  -3  -5   2  611.96   21.03
  -3  -5   2  625.60   22.29
  -3  -5   2  632.36   21.20
  -3  -5   3   18.53    3.33
  -3  -5   3   25.20    3.75
  -3  -5   3   19.60    2.92
  -3  -5   3   19.45    3.12
  -3  -5   3   22.81    2.78
  -3  -5   4   26.18    4.11
  -3  -5   4   20.99    3.19
  -3  -5   4   20.21    3.54
  -3  -5   4   20.26    2.49
  -3  -5   4   21.91    3.34
  -3  -5   5  511.37   21.13
  -3  -5   5  570.84   21.17
  -3  -5   5  517.80   16.25
  -3  -5   5  529.19   21.67
  -3  -5   5  492.97   19.65
  -3  -5   6   74.77    6.92
  -3  -5   6   73.22    3.92
  -3  -5   6   63.51    6.16
  -3  -5   6   69.33    6.21
  -3  -5   7  182.75   12.19
  -3  -5   7  174.87   10.96
  -3  -5   7  182.00    5.73
  -3  -5   7  198.45   11.60
  -3  -5   7  188.08   11.17
  -3  -5   8  855.69   29.84
  -3  -5   8  892.44   30.90
  -3  -5   8  835.12   31.86
  -3  -5   8  878.57   30.78
  -3  -5   9   67.15    7.42
  -3  -5   9   72.53    6.29
  -3  -5   9   64.71    6.84
  -3  -5   9   63.57    6.70
  -3  -5   9   57.79    5.95
  -3  -5  10   47.44    6.52
  -3  -5  10   46.84    5.30
  -3  -5  10   49.68    6.12
  -3  -5  10   42.77    5.72
  -3  -5  10   51.85    5.40
  -3  -5  11   64.17    7.04
  -3  -5  11   74.73    6.71
  -3  -5  11   67.30    7.43
  -3  -5  11   64.23    6.07
  -3  -5  12   89.82    8.96
  -3  -5  12   86.69    7.42
  -3  -5  12   86.83    6.95
  -3  -5  13   29.07    5.15
  -3  -4  -9  208.77   13.50
  -3  -4  -8  192.59   12.50
  -3  -4  -8  165.68    8.95
  -3  -4  -7  478.24   18.19
  -3  -4  -7  503.18   21.54
  -3  -4  -6   19.91    4.21
  -3  -4  -6   10.97    2.74
  -3  -4  -6   17.99    2.92
  -3  -4  -5   96.24    7.83
  -3  -4  -5   94.89    8.44
  -3  -4  -5  106.78    7.40
  -3  -4  -4    3.19    1.37
  -3  -4  -4    3.63    1.37
  -3  -4  -4    5.66    1.41
  -3  -4  -4    2.40    1.17
  -3  -4  -3   56.34    5.35
  -3  -4  -3   58.20    5.95
  -3  -4  -3   55.02    4.61
  -3  -4  -3   55.73    5.59
  -3  -4  -3   57.73    2.75
  -3  -4  -2  309.12   14.30
  -3  -4  -2  324.89   15.10
  -3  -4  -2  305.84   14.44
  -3  -4  -2  327.63   13.04
  -3  -4  -2  316.88   10.29
  -3  -4  -1 1223.36   35.14
  -3  -4  -1 1164.39   37.06
  -3  -4  -1 1237.87   33.50
  -3  -4  -1 1247.13   37.49
  -3  -4  -1 1228.45   37.50
  -3  -4  -1 1252.12   32.68
  -3  -4   0   68.38    5.97
  -3  -4   0   86.83    6.82
  -3  -4   0   77.15    5.57
  -3  -4   0   73.31    5.88
  -3  -4   0   78.89    4.81
  -3  -4   0   75.64    5.20
  -3  -4   1   49.66    4.54
  -3  -4   1   52.92    4.55
  -3  -4   1   48.94    3.88
  -3  -4   1   54.72    5.23
  -3  -4   1   46.13    4.38
  -3  -4   2  639.15   22.00
  -3  -4   2  655.82   21.97
  -3  -4   2  640.23   20.85
  -3  -4   2  706.64   24.00
  -3  -4   2  641.46   21.06
  -3  -4   3  242.53   11.36
  -3  -4   3  224.55    9.78
  -3  -4   3  227.88   11.43
  -3  -4   3  241.23   12.06
  -3  -4   3  226.71   10.54
  -3  -4   4  246.56    9.78
  -3  -4   4  230.92   11.47
  -3  -4   4  239.95   11.24
  -3  -4   4  242.32   12.23
  -3  -4   4  248.01   12.38
  -3  -4   5  148.08    6.76
  -3  -4   5  169.62   10.18
  -3  -4   5  150.82    9.06
  -3  -4   5  152.03    8.87
  -3  -4   5  151.91    9.32
  -3  -4   6 2005.70   55.80
  -3  -4   6 1996.51   50.19
  -3  -4   6 2031.98   57.58
  -3  -4   6 1892.08   55.22
  -3  -4   7  254.61   12.42
  -3  -4   7  238.17   12.72
  -3  -4   7  245.16    8.47
  -3  -4   7  254.46   13.77
  -3  -4   7  252.33   12.95
  -3  -4   8 1268.78   31.71
  -3  -4   8 1236.72   37.54
  -3  -4   8 1276.86   38.01
  -3  -4   8 1297.53   39.89
  -3  -4   8 1190.11   38.81
  -3  -4   8 1180.51   40.25
  -3  -4   9 1488.15   42.49
  -3  -4   9 1447.19   36.28
  -3  -4   9 1552.21   45.67
  -3  -4   9 1436.46   35.75
  -3  -4   9 1410.97   46.16
  -3  -4   9 1446.79   45.12
  -3  -4   9 1524.19   43.31
  -3  -4  10  201.70   10.49
  -3  -4  10  214.66   11.50
  -3  -4  10  215.32   13.69
  -3  -4  10  208.89   12.73
  -3  -4  10  188.60    6.63
  -3  -4  10  209.24    7.11
  -3  -4  10  225.85   13.19
  -3  -4  11  569.94   15.75
  -3  -4  11  564.34   16.03
  -3  -4  11  613.93   25.10
  -3  -4  11  593.64   24.64
  -3  -4  11  597.75   20.51
  -3  -4  11  599.55   25.88
  -3  -4  11  635.39   23.01
  -3  -4  12  415.03   12.45
  -3  -4  12  438.18   20.92
  -3  -4  12  425.36   15.96
  -3  -4  12  457.56   19.12
  -3  -4  13   32.88    5.24
  -3  -4  13   22.57    3.86
  -3  -3 -10    0.48    1.11
  -3  -3  -9   78.71    7.32
  -3  -3  -8  122.55    8.95
  -3  -3  -7  960.25   28.47
  -3  -3  -7  947.76   34.38
  -3  -3  -6    5.19    1.49
  -3  -3  -6    4.58    1.99
  -3  -3  -6    6.62    1.76
  -3  -3  -5  211.46   12.41
  -3  -3  -5  210.47   11.11
  -3  -3  -5  196.46    9.87
  -3  -3  -4  831.75   26.43
  -3  -3  -4  792.46   27.07
  -3  -3  -4  873.83   29.47
  -3  -3  -4  860.55   24.66
  -3  -3  -3    2.47    1.17
  -3  -3  -3    0.70    1.12
  -3  -3  -3    2.31    0.90
  -3  -3  -3    0.09    0.54
  -3  -3  -2   31.21    3.96
  -3  -3  -2   37.03    3.93
  -3  -3  -2   34.06    3.13
  -3  -3  -2   33.36    2.15
  -3  -3  -2   30.56    3.65
  -3  -3  -1 2251.75   55.11
  -3  -3  -1 2203.16   57.26
  -3  -3  -1 2268.73   60.27
  -3  -3  -1 2273.33   59.88
  -3  -3   0 1101.33   30.92
  -3  -3   0 1055.49   32.89
  -3  -3   0 1174.14   33.86
  -3  -3   0 1160.94   30.26
  -3  -3   0 1122.82   31.56
  -3  -3   1 1740.51   47.87
  -3  -3   1 1742.53   46.90
  -3  -3   1 1762.04   46.29
  -3  -3   1 1675.93   44.77
  -3  -3   1 1780.97   46.25
  -3  -3   2 1136.09   33.38
  -3  -3   2 1234.94   34.16
  -3  -3   2 1172.73   34.77
  -3  -3   2 1177.13   33.16
  -3  -3   3  547.89   19.12
  -3  -3   3  547.14   17.47
  -3  -3   3  542.10   19.22
  -3  -3   3  517.72   18.40
  -3  -3   4 1265.62   34.21
  -3  -3   4 1270.60   36.68
  -3  -3   4 1276.39   37.15
  -3  -3   4 1215.24   36.31
  -3  -3   5 2233.72   58.87
  -3  -3   5 2104.39   55.17
  -3  -3   5 2117.07   57.87
  -3  -3   6 1903.69   53.79
  -3  -3   6 2103.21   55.70
  -3  -3   6 1915.55   52.67
  -3  -3   6 2059.62   53.27
  -3  -3   6 1881.42   49.87
  -3  -3   7   23.53    3.74
  -3  -3   7   26.55    3.29
  -3  -3   7   22.89    2.56
  -3  -3   7   27.02    3.77
  -3  -3   7   23.74    3.06
  -3  -3   8  639.30   20.40
  -3  -3   8  645.00   24.75
  -3  -3   8  624.12   23.64
  -3  -3   8  645.10   22.61
  -3  -3   8  689.49   22.01
  -3  -3   9    9.61    2.17
  -3  -3   9    9.22    2.81
  -3  -3   9    6.62    1.49
  -3  -3   9    8.19    2.04
  -3  -3   9   10.67    1.63
  -3  -3   9    9.03    1.86
  -3  -3  10   73.21    6.40
  -3  -3  10   74.27    4.75
  -3  -3  10   80.55    4.85
  -3  -3  10   88.14    7.61
  -3  -3  10   79.87    5.72
  -3  -3  10   77.37    5.39
  -3  -3  10   74.43    7.14
  -3  -3  11  462.61   15.91
  -3  -3  11  520.79   21.94
  -3  -3  11  458.42   16.13
  -3  -3  11  481.91   16.19
  -3  -3  11  483.13   20.99
  -3  -3  11  485.66   17.86
  -3  -3  12   48.75    4.12
  -3  -3  12   48.15    4.27
  -3  -3  12   48.19    4.89
  -3  -3  12   45.91    5.86
  -3  -3  12   48.06    5.42
  -3  -3  12   45.87    5.81
  -3  -3  13   83.28    7.61
  -3  -3  13  111.02    9.59
  -3  -2 -11  315.95   15.53
  -3  -2 -10  205.18   11.65
  -3  -2  -9  237.97   12.38
  -3  -2  -9  235.29   14.59
  -3  -2  -8  783.60   29.85
  -3  -2  -8  798.98   26.74
  -3  -2  -7  161.43   11.06
  -3  -2  -6  160.61   10.71
  -3  -2  -6  171.23    9.29
  -3  -2  -6  169.62    8.12
  -3  -2  -5   84.90    6.03
  -3  -2  -5   82.83    7.07
  -3  -2  -5   89.85    5.68
  -3  -2  -4  113.48    5.31
  -3  -2  -4  118.04    6.69
  -3  -2  -4  115.65    8.12
  -3  -2  -4  117.82    7.12
  -3  -2  -3 1640.75   45.89
  -3  -2  -3 1690.60   43.01
  -3  -2  -3 1699.50   45.60
  -3  -2  -3 1820.07   48.67
  -3  -2  -2 1205.05   36.42
  -3  -2  -2 1205.60   34.78
  -3  -2  -2 1217.92   32.52
  -3  -2  -2 1269.07   30.55
  -3  -2  -2 1246.99   30.32
  -3  -2  -1   30.01    3.54
  -3  -2  -1   31.76    3.34
  -3  -2  -1   32.68    2.72
  -3  -2   0  106.95    6.49
  -3  -2   0  107.36    6.32
  -3  -2   1   48.14    3.66
  -3  -2   1   43.19    3.90
  -3  -2   1   40.67    3.74
  -3  -2   2 2842.84   74.45
  -3  -2   2 2965.10   74.42
  -3  -2   3  123.66    6.67
  -3  -2   3  115.17    6.61
  -3  -2   3  120.67    7.02
  -3  -2   3  129.39    7.08
  -3  -2   4    8.65    1.72
  -3  -2   4    8.59    1.69
  -3  -2   4    7.59    1.41
  -3  -2   4    9.41    1.97
  -3  -2   5  917.69   27.41
  -3  -2   5  931.49   28.71
  -3  -2   5  906.69   27.50
  -3  -2   5  942.94   28.26
  -3  -2   6  105.20    6.75
  -3  -2   6  103.27    6.37
  -3  -2   6  106.01    5.49
  -3  -2   6   96.22    6.83
  -3  -2   6  103.89    6.19
  -3  -2   7   68.95    4.47
  -3  -2   7   67.99    5.84
  -3  -2   7   72.44    5.70
  -3  -2   7   62.26    4.66
  -3  -2   7   68.02    5.28
  -3  -2   8    2.59    1.19
  -3  -2   8    3.72    1.10
  -3  -2   8    1.90    1.21
  -3  -2   8    1.76    1.08
  -3  -2   8    2.57    0.91
  -3  -2   9   55.69    5.80
  -3  -2   9   62.27    4.70
  -3  -2   9   55.33    5.36
  -3  -2  10  572.45   22.95
  -3  -2  10  572.36   19.59
  -3  -2  10  568.13   19.62
  -3  -2  10  584.49   22.04
  -3  -2  11  211.97   12.85
  -3  -2  11  211.75   10.47
  -3  -2  11  206.99   11.92
  -3  -2  11  213.10   10.62
  -3  -2  12  157.69   10.60
  -3  -2  12  150.15    9.20
  -3  -2  12  171.77    9.65
  -3  -2  12  154.39   11.17
  -3  -2  13    1.70    1.44
  -3  -2  13    1.47    0.84
  -3  -2  13    4.85    1.97
  -3  -1 -11  374.86   15.69
  -3  -1 -10  604.37   25.31
  -3  -1 -10  563.15   20.47
  -3  -1  -9   24.30    4.20
  -3  -1  -9   20.51    2.92
  -3  -1  -8  648.51   21.16
  -3  -1  -8  600.06   24.47
  -3  -1  -7  879.18   26.77
  -3  -1  -7  909.67   31.09
  -3  -1  -6  459.33   16.04
  -3  -1  -6  476.63   19.32
  -3  -1  -5 1101.11   33.20
  -3  -1  -5  980.40   29.00
  -3  -1  -4  203.24    8.98
  -3  -1  -4  216.54    9.00
  -3  -1  -4  203.59   10.86
  -3  -1  -3   98.18    3.97
  -3  -1  -3   99.64    6.79
  -3  -1  -3   97.00    5.58
  -3  -1  -3  101.36    3.30
  -3  -1  -3   98.05    5.59
  -3  -1  -2  339.64   10.29
  -3  -1  -2  333.13   12.33
  -3  -1  -2  329.03   13.69
  -3  -1  -2  350.00    9.67
  -3  -1  -1 2474.93   65.30
  -3  -1  -1 2565.21   61.70
  -3  -1  -1 2663.54   61.13
  -3  -1  -1 2568.36   64.05
  -3  -1   0  391.47   11.49
  -3  -1   0  396.66   13.80
  -3  -1   1   50.38    4.20
  -3  -1   1   55.56    3.67
  -3  -1   1   50.65    3.91
  -3  -1   2   36.58    3.56
  -3  -1   2   34.72    3.05
  -3  -1   2   34.72    3.18
  -3  -1   3 1145.51   32.81
  -3  -1   3 1139.61   32.42
  -3  -1   3 1137.08   33.52
  -3  -1   4  253.23   11.01
  -3  -1   4  266.58   10.77
  -3  -1   4  275.71   10.14
  -3  -1   4  282.52   10.02
  -3  -1   5  202.65    9.80
  -3  -1   5  202.34    9.91
  -3  -1   5  193.42    9.41
  -3  -1   5  192.59    8.53
  -3  -1   5  202.53    8.59
  -3  -1   6  252.83   10.47
  -3  -1   6  263.52   12.01
  -3  -1   6  266.74   11.76
  -3  -1   7  166.36    9.28
  -3  -1   7  162.44    8.25
  -3  -1   7  162.64    9.37
  -3  -1   8   31.39    3.52
  -3  -1   8   37.00    4.44
  -3  -1   9    1.97    1.21
  -3  -1   9    3.10    1.54
  -3  -1   9    1.84    1.19
  -3  -1  10  248.23   12.06
  -3  -1  10  239.52   11.90
  -3  -1  10  266.68   13.52
  -3  -1  10  233.31   13.14
  -3  -1  11  918.36   30.02
  -3  -1  11  979.29   32.33
  -3  -1  11  906.26   29.99
  -3  -1  12  663.82   25.80
  -3  -1  12  678.29   25.70
  -3  -1  12  708.87   27.13
  -3  -1  12  749.20   26.24
  -3  -1  13   29.51    4.44
  -3   0 -11   20.50    2.66
  -3   0 -10  117.24    6.51
  -3   0 -10  106.71    8.86
  -3   0  -9  233.91    9.75
  -3   0  -9  229.50   13.17
  -3   0  -8  640.42   19.52
  -3   0  -8  629.65   24.08
  -3   0  -7    3.73    1.12
  -3   0  -7    3.33    1.28
  -3   0  -6   37.84    4.48
  -3   0  -6   35.11    2.93
  -3   0  -5 2736.64   71.68
  -3   0  -5 2642.65   64.45
  -3   0  -4  808.16   20.87
  -3   0  -4  845.63   26.38
  -3   0  -4  789.06   22.36
  -3   0  -3 2082.52   55.16
  -3   0  -3 1966.06   49.78
  -3   0  -2 1590.11   42.53
  -3   0  -2 1565.19   37.13
  -3   0  -2 1460.76   37.79
  -3   0  -1   91.03    3.97
  -3   0  -1   97.27    4.32
  -3   0   0   17.31    2.49
  -3   0   0   19.79    1.90
  -3   0   0   21.61    1.98
  -3   0   1 3507.77   85.75
  -3   0   1 3606.81   85.06
  -3   0   1 3512.31   87.89
  -3   0   2 1632.46   45.66
  -3   0   2 1639.07   43.77
  -3   0   2 1642.33   43.96
  -3   0   3 4880.10  115.43
  -3   0   3 4605.51  114.54
  -3   0   3 4785.46  114.43
  -3   0   3 4577.15  116.77
  -3   0   4 8093.73  192.62
  -3   0   4 8235.65  191.75
  -3   0   4 7878.68  191.64
  -3   0   5  424.94   15.55
  -3   0   5  448.85   16.42
  -3   0   6  905.06   28.23
  -3   0   6  975.89   28.64
  -3   0   7   13.65    2.33
  -3   0   7   12.10    2.34
  -3   0   7   13.80    2.48
  -3   0   8  128.83    8.12
  -3   0   8  144.08    8.65
  -3   0   8  153.93    9.38
  -3   0   9  142.80    9.51
  -3   0   9  145.34    9.66
  -3   0   9  123.59    8.48
  -3   0   9  140.79    8.67
  -3   0  10  608.40   24.54
  -3   0  10  661.20   24.29
  -3   0  10  707.84   25.75
  -3   0  10  652.45   24.18
  -3   0  10  621.26   23.20
  -3   0  11   96.60    8.01
  -3   0  11   92.09    7.84
  -3   0  11   85.49    7.25
  -3   0  11  101.41    8.49
  -3   0  11   97.21    8.52
  -3   0  12  116.57    9.87
  -3   0  12  117.91    8.88
  -3   0  12  109.19    9.35
  -3   0  13   37.62    5.35
  -3   1 -11  278.55   14.82
  -3   1 -11  258.89    8.15
  -3   1 -10  397.54   11.69
  -3   1 -10  406.24   18.24
  -3   1  -9  271.22   14.19
  -3   1  -9  305.00    9.36
  -3   1  -8  190.33   10.96
  -3   1  -8  197.15    6.71
  -3   1  -7  105.45    4.26
  -3   1  -7  106.99    7.60
  -3   1  -6  347.36   14.90
  -3   1  -6  352.54   11.52
  -3   1  -6  350.54   10.22
  -3   1  -5  212.27    8.00
  -3   1  -5  227.56   10.86
  -3   1  -5  204.92    6.86
  -3   1  -4  380.00   15.05
  -3   1  -4  389.84   12.35
  -3   1  -3 1965.74   48.41
  -3   1  -3 2075.15   49.59
  -3   1  -2   43.04    2.80
  -3   1  -2   45.27    4.17
  -3   1  -2   41.81    2.96
  -3   1  -1  739.28   20.68
  -3   1  -1  726.99   23.45
  -3   1  -1  745.86   20.78
  -3   1   0  314.00   11.02
  -3   1   0  335.26   11.98
  -3   1   0  301.06   12.92
  -3   1   1 2689.73   68.26
  -3   1   1 2656.73   70.78
  -3   1   1 2845.09   69.08
  -3   1   1 2760.13   67.86
  -3   1   2 1995.70   52.21
  -3   1   2 1968.86   53.06
  -3   1   3 1964.30   54.27
  -3   1   3 2200.65   53.94
  -3   1   4 3231.51   81.11
  -3   1   4 3110.42   81.12
  -3   1   4 3262.01   80.12
  -3   1   5  182.51    9.00
  -3   1   5  174.77    9.35
  -3   1   6  766.97   26.09
  -3   1   6  797.10   26.76
  -3   1   7  370.02   16.29
  -3   1   7  357.70   15.70
  -3   1   7  391.76   15.26
  -3   1   8   12.76    2.45
  -3   1   8    8.57    2.41
  -3   1   8    7.46    2.05
  -3   1   9  679.60   23.87
  -3   1   9  702.03   26.15
  -3   1   9  670.46   25.36
  -3   1  10  533.26   22.15
  -3   1  10  495.11   21.61
  -3   1  10  529.43   20.33
  -3   1  10  513.43   22.15
  -3   1  11  124.58    9.82
  -3   1  11  124.53   10.04
  -3   1  11   92.91    8.63
  -3   1  11  124.36    8.77
  -3   1  12  485.72   20.62
  -3   1  12  520.13   23.46
  -3   2 -11  248.55   13.32
  -3   2 -10 1169.97   36.91
  -3   2  -9  551.20   21.08
  -3   2  -8   18.94    3.07
  -3   2  -7   21.15    3.06
  -3   2  -7   24.48    2.71
  -3   2  -6 2561.98   68.48
  -3   2  -6 2660.56   66.00
  -3   2  -5 3879.62   91.47
  -3   2  -5 3512.64   93.20
  -3   2  -4 2481.52   57.34
  -3   2  -4 2454.22   57.45
  -3   2  -4 2448.70   63.41
  -3   2  -4 2366.35   60.73
  -3   2  -3  892.45   23.39
  -3   2  -3  899.38   27.86
  -3   2  -3  918.55   25.69
  -3   2  -3  901.83   23.29
  -3   2  -2 1671.58   43.43
  -3   2  -2 1673.47   42.06
  -3   2  -2 1723.75   46.30
  -3   2  -2 1651.53   41.64
  -3   2  -1    6.04    1.23
  -3   2  -1    6.58    1.68
  -3   2  -1    5.12    1.10
  -3   2  -1    5.51    1.05
  -3   2  -1    5.79    1.33
  -3   2   0  100.55    5.99
  -3   2   0   94.83    6.73
  -3   2   0  104.36    5.62
  -3   2   0   95.72    5.45
  -3   2   1   38.71    3.37
  -3   2   1   42.27    3.85
  -3   2   2   55.65    4.69
  -3   2   2   57.74    4.57
  -3   2   3  318.03   13.51
  -3   2   3  336.27   12.69
  -3   2   3  340.82   13.71
  -3   2   4  169.67    8.48
  -3   2   4  148.94    8.90
  -3   2   5   73.13    6.14
  -3   2   5   74.83    6.25
  -3   2   5   83.55    5.80
  -3   2   6  361.92   16.15
  -3   2   6  350.00   15.88
  -3   2   6  375.62   14.70
  -3   2   7  112.66    8.42
  -3   2   7  114.55    7.39
  -3   2   7   89.58    7.56
  -3   2   8  430.96   19.11
  -3   2   8  430.27   16.87
  -3   2   9  376.76   18.25
  -3   2   9  337.63   17.55
  -3   2   9  362.49   18.01
  -3   2   9  372.46   15.98
  -3   2  10  188.80   12.67
  -3   2  10  180.94   12.61
  -3   2  10  190.03   10.86
  -3   2  11   29.89    4.25
  -3   2  11   30.17    5.28
  -3   2  12   40.56    6.30
  -3   3 -12  993.58   32.69
  -3   3 -11  359.93   15.92
  -3   3 -10  175.72   10.13
  -3   3  -9   13.94    2.58
  -3   3  -8   18.15    2.89
  -3   3  -8   19.13    2.76
  -3   3  -7  270.73   12.32
  -3   3  -7  287.15   12.09
  -3   3  -7  271.82    8.56
  -3   3  -6   72.95    5.62
  -3   3  -6   74.20    3.72
  -3   3  -6   80.49    5.62
  -3   3  -5 1096.67   28.95
  -3   3  -5 1111.95   33.06
  -3   3  -5 1131.88   32.30
  -3   3  -4  864.59   24.10
  -3   3  -4  860.11   27.68
  -3   3  -4  912.73   22.93
  -3   3  -4  899.17   26.86
  -3   3  -3 3542.10   86.43
  -3   3  -3 3474.50   87.11
  -3   3  -3 3455.82   91.02
  -3   3  -3 3754.76   90.03
  -3   3  -2  284.90   13.12
  -3   3  -2  292.26   11.84
  -3   3  -2  312.01   10.83
  -3   3  -2  309.70   12.13
  -3   3  -2  306.52   10.90
  -3   3  -1  293.38   13.19
  -3   3  -1  268.93   10.50
  -3   3  -1  268.81   10.54
  -3   3  -1  275.98   11.48
  -3   3  -1  280.13   11.26
  -3   3   0 1396.82   37.57
  -3   3   0 1407.76   37.22
  -3   3   0 1431.94   38.66
  -3   3   1 1256.02   38.39
  -3   3   1 1369.62   37.78
  -3   3   1 1321.40   38.09
  -3   3   2  200.33   10.30
  -3   3   2  204.11    9.51
  -3   3   2  187.96    9.77
  -3   3   3 2904.95   76.49
  -3   3   3 2881.56   76.63
  -3   3   3 3006.06   75.00
  -3   3   4  293.31   13.99
  -3   3   4  323.22   14.46
  -3   3   4  304.46   12.82
  -3   3   5  573.16   22.30
  -3   3   5  597.03   22.40
  -3   3   5  572.08   20.17
  -3   3   6 1637.55   48.19
  -3   3   6 1528.83   44.31
  -3   3   6 1592.47   47.71
  -3   3   7  365.78   17.73
  -3   3   7  371.51   17.67
  -3   3   7  356.16   15.22
  -3   3   8  119.19    9.86
  -3   3   8  123.34    9.94
  -3   3   8  124.20    8.29
  -3   3   9  218.14   14.25
  -3   3   9  220.40   11.96
  -3   3  10  452.74   22.52
  -3   3  10  454.27   21.14
  -3   3  10  430.73   18.63
  -3   3  11   40.92    6.28
  -3   3  11   35.62    5.52
  -3   4 -12  411.46   16.69
  -3   4 -11  157.67    9.13
  -3   4 -10  128.38    7.97
  -3   4  -9   30.29    4.00
  -3   4  -9   34.48    3.96
  -3   4  -8   93.98    7.00
  -3   4  -8   93.97    4.93
  -3   4  -8   83.63    6.20
  -3   4  -7  348.68   14.33
  -3   4  -7  353.42   12.27
  -3   4  -7  362.39   15.11
  -3   4  -6  416.46   13.86
  -3   4  -6  394.89   15.78
  -3   4  -6  409.62   16.28
  -3   4  -5  120.67    7.74
  -3   4  -5  122.09    6.39
  -3   4  -4  396.91   16.30
  -3   4  -4  399.97   14.23
  -3   4  -4  431.02   13.12
  -3   4  -4  420.86   16.29
  -3   4  -3  453.13   14.73
  -3   4  -3  459.96   15.72
  -3   4  -3  440.93   17.75
  -3   4  -3  456.74   16.34
  -3   4  -3  467.64   17.25
  -3   4  -2  326.22   13.59
  -3   4  -2  312.77   14.44
  -3   4  -2  351.36   12.55
  -3   4  -2  321.83   12.57
  -3   4  -2  309.02   12.97
  -3   4  -1 1490.06   40.80
  -3   4  -1 1516.09   40.01
  -3   4  -1 1614.09   40.36
  -3   4   0  749.11   25.17
  -3   4   0  772.55   24.52
  -3   4   0  758.64   24.67
  -3   4   0  810.84   25.05
  -3   4   1  958.16   31.47
  -3   4   1 1063.44   31.17
  -3   4   1  982.80   31.08
  -3   4   1 1057.97   31.02
  -3   4   2 1391.77   40.21
  -3   4   2 1336.95   40.19
  -3   4   2 1299.32   38.94
  -3   4   2 1353.97   38.79
  -3   4   3   60.70    5.58
  -3   4   3   63.47    5.39
  -3   4   3   58.82    5.79
  -3   4   3   59.27    5.83
  -3   4   4  308.62   15.45
  -3   4   4  324.50   13.91
  -3   4   4  320.28   14.74
  -3   4   4  297.80   15.04
  -3   4   5  287.09   15.21
  -3   4   5  291.32   14.52
  -3   4   5  293.33   15.27
  -3   4   5  296.25   13.44
  -3   4   6 1148.78   38.71
  -3   4   6 1216.82   40.75
  -3   4   6 1224.41   37.20
  -3   4   7  557.51   24.29
  -3   4   7  520.08   23.32
  -3   4   7  517.77   22.21
  -3   4   7  537.96   20.72
  -3   4   8  922.52   34.95
  -3   4   8  900.88   32.89
  -3   4   8  898.28   30.44
  -3   4   9  181.73   13.55
  -3   4   9  177.25   12.27
  -3   4   9  144.79    9.90
  -3   4  10   22.67    5.01
  -3   4  10   22.91    4.39
  -3   5 -12  199.44    9.68
  -3   5 -11  166.25    8.67
  -3   5 -10   36.99    4.78
  -3   5 -10   38.75    3.87
  -3   5  -9  992.27   29.71
  -3   5  -9  972.31   28.36
  -3   5  -9  987.73   32.95
  -3   5  -8  934.06   28.76
  -3   5  -8  935.12   27.65
  -3   5  -8  967.85   31.76
  -3   5  -7   49.98    4.64
  -3   5  -7   45.80    4.10
  -3   5  -7   55.41    5.50
  -3   5  -6 1135.23   36.15
  -3   5  -6 1177.37   35.15
  -3   5  -6 1176.26   33.58
  -3   5  -5   34.38    4.02
  -3   5  -5   28.97    3.28
  -3   5  -5   37.17    4.38
  -3   5  -4  156.48    9.58
  -3   5  -4  151.75    8.41
  -3   5  -4  172.31   10.06
  -3   5  -4  175.18    7.89
  -3   5  -3  311.13   14.92
  -3   5  -3  324.38   13.56
  -3   5  -3  323.27   13.63
  -3   5  -3  329.54   14.73
  -3   5  -3  341.50   12.93
  -3   5  -2  264.02   11.39
  -3   5  -2  263.96   12.06
  -3   5  -2  258.65   11.83
  -3   5  -1  609.16   20.70
  -3   5  -1  546.22   20.66
  -3   5  -1  568.30   21.09
  -3   5  -1  570.50   20.46
  -3   5   0  349.26   15.22
  -3   5   0  359.86   15.57
  -3   5   0  344.50   15.58
  -3   5   1  494.26   20.30
  -3   5   1  520.21   19.94
  -3   5   1  521.51   20.22
  -3   5   1  553.51   20.15
  -3   5   2   12.25    2.59
  -3   5   2   12.54    2.60
  -3   5   2   13.81    2.89
  -3   5   2   13.49    2.77
  -3   5   3   11.51    2.67
  -3   5   3    5.67    1.71
  -3   5   3   11.39    2.42
  -3   5   3    4.99    1.65
  -3   5   4   11.87    2.88
  -3   5   4   13.33    2.97
  -3   5   4   14.48    3.29
  -3   5   4   17.04    3.05
  -3   5   5  141.06   10.73
  -3   5   5  148.14   11.07
  -3   5   5  163.91   10.97
  -3   5   5  161.90    9.98
  -3   5   6   86.28    8.15
  -3   5   6   98.85    9.29
  -3   5   6   99.66    7.68
  -3   5   7   72.11    8.26
  -3   5   7   70.41    7.47
  -3   5   7   75.21    6.83
  -3   5   8  138.16   11.07
  -3   5   8  147.47   12.56
  -3   5   8  138.78    9.77
  -3   5   9  154.18   12.25
  -3   5   9  182.63   14.47
  -3   6 -11  128.34    7.51
  -3   6 -11  124.56    6.50
  -3   6 -10  165.80    8.18
  -3   6 -10  165.00    8.82
  -3   6  -9   28.27    4.40
  -3   6  -9   32.90    3.79
  -3   6  -9   27.96    3.35
  -3   6  -8  757.72   25.07
  -3   6  -8  737.09   24.12
  -3   6  -8  763.33   28.20
  -3   6  -7  537.93   19.70
  -3   6  -7  551.14   22.38
  -3   6  -7  540.43   19.83
  -3   6  -6  380.20   17.25
  -3   6  -6  339.50   14.80
  -3   6  -6  346.68   15.13
  -3   6  -5   70.45    5.98
  -3   6  -5   81.23    7.18
  -3   6  -5   80.25    6.72
  -3   6  -4   90.56    6.96
  -3   6  -4  107.81    6.74
  -3   6  -4   95.00    6.73
  -3   6  -4   88.47    7.49
  -3   6  -4   94.95    7.77
  -3   6  -3   93.74    6.87
  -3   6  -3   94.13    7.86
  -3   6  -3   82.30    6.71
  -3   6  -3   92.56    7.56
  -3   6  -3   91.91    6.53
  -3   6  -2  184.37   10.33
  -3   6  -2  200.59   10.93
  -3   6  -2  192.03   10.83
  -3   6  -2  203.68   11.64
  -3   6  -1  287.05   14.03
  -3   6  -1  282.05   13.86
  -3   6  -1  282.06   14.27
  -3   6   0  586.40   22.86
  -3   6   0  607.09   22.94
  -3   6   0  582.66   22.56
  -3   6   0  571.06   22.36
  -3   6   1  369.53   17.41
  -3   6   1  380.10   17.46
  -3   6   1  351.45   16.77
  -3   6   1  375.95   16.93
  -3   6   2    7.92    2.15
  -3   6   2   11.02    2.49
  -3   6   2   11.15    2.63
  -3   6   2    9.29    2.74
  -3   6   3  170.56   11.58
  -3   6   3  147.49   10.63
  -3   6   3  154.76   10.14
  -3   6   3  141.93   10.80
  -3   6   4  260.47   14.91
  -3   6   4  280.98   14.31
  -3   6   4  251.10   15.36
  -3   6   5  378.10   18.97
  -3   6   5  349.83   19.26
  -3   6   5  362.13   17.13
  -3   6   6  411.35   20.25
  -3   6   6  373.00   17.90
  -3   6   6  402.86   21.55
  -3   6   7  394.27   21.96
  -3   6   7  377.04   20.16
  -3   7 -11  191.87   10.64
  -3   7 -10  176.83   10.28
  -3   7  -9  387.05   14.25
  -3   7  -9  387.87   16.89
  -3   7  -8  244.31   12.93
  -3   7  -8  251.73   11.54
  -3   7  -7    2.38    1.55
  -3   7  -7    2.78    1.47
  -3   7  -6   84.17    6.92
  -3   7  -6   67.94    6.46
  -3   7  -6   68.90    7.29
  -3   7  -5  540.27   21.56
  -3   7  -5  507.08   22.31
  -3   7  -5  524.84   21.07
  -3   7  -4  144.27    9.01
  -3   7  -4  153.67   10.51
  -3   7  -4  134.06    9.53
  -3   7  -4  142.45    8.82
  -3   7  -4  139.61   10.32
  -3   7  -3  256.75   14.49
  -3   7  -3  243.91   12.77
  -3   7  -3  261.29   13.09
  -3   7  -3  243.44   13.47
  -3   7  -3  266.24   14.60
  -3   7  -2 1601.61   48.32
  -3   7  -2 1716.86   49.94
  -3   7  -2 1715.82   50.72
  -3   7  -2 1557.07   48.16
  -3   7  -1  567.49   22.76
  -3   7  -1  564.08   23.13
  -3   7  -1  544.71   22.66
  -3   7  -1  579.93   23.66
  -3   7   0   59.71    6.41
  -3   7   0   53.19    6.17
  -3   7   0   53.26    6.20
  -3   7   0   52.33    6.19
  -3   7   1  402.02   19.16
  -3   7   1  383.96   18.73
  -3   7   1  351.59   17.69
  -3   7   1  393.57   19.22
  -3   7   2   13.53    3.41
  -3   7   2   14.32    3.35
  -3   7   2   15.08    3.33
  -3   7   3   45.64    6.28
  -3   7   3   45.14    5.70
  -3   7   3   47.23    6.31
  -3   7   4  676.89   28.42
  -3   7   4  692.71   29.76
  -3   7   5   58.23    7.61
  -3   7   5   37.36    5.93
  -3   7   6  168.75   13.10
  -3   7   6  173.00   14.34
  -3   8 -10   30.94    4.54
  -3   8  -9  736.72   27.71
  -3   8  -8  188.08    9.73
  -3   8  -8  175.81   11.55
  -3   8  -7   79.28    6.72
  -3   8  -7   71.40    7.04
  -3   8  -6  126.65    9.27
  -3   8  -6  133.45   10.02
  -3   8  -5   72.71    7.34
  -3   8  -5   65.96    6.09
  -3   8  -5   62.78    6.79
  -3   8  -4   44.84    5.20
  -3   8  -4   34.93    5.37
  -3   8  -4   36.23    5.11
  -3   8  -3  120.87    9.08
  -3   8  -3  122.67    9.85
  -3   8  -3  118.50    9.14
  -3   8  -2  870.51   30.88
  -3   8  -2  872.11   32.07
  -3   8  -2  804.37   30.81
  -3   8  -1 1038.37   35.80
  -3   8  -1 1006.61   36.13
  -3   8  -1  993.26   36.28
  -3   8   0 1006.11   36.31
  -3   8   0 1023.13   36.99
  -3   8   1  240.03   15.06
  -3   8   1  233.36   15.13
  -3   8   2   60.95    7.53
  -3   8   2   52.27    7.00
  -3   8   3   28.72    5.42
  -3   8   3   24.47    4.83
  -3   8   4  279.98   18.34
  -3   9  -8  314.86   17.44
  -3   9  -7   26.67    4.10
  -3   9  -7   28.26    4.89
  -3   9  -6   12.34    3.09
  -3   9  -6    8.57    2.67
  -3   9  -5  105.90    9.56
  -3   9  -5  112.03    8.46
  -3   9  -5   93.97    9.10
  -3   9  -4   32.02    5.45
  -3   9  -4   38.79    5.12
  -3   9  -4   49.87    6.59
  -3   9  -3   38.93    5.29
  -3   9  -3   31.87    5.43
  -3   9  -2   63.35    7.14
  -3   9  -2   67.29    7.77
  -3   9  -1   19.92    4.07
  -3   9  -1    8.63    2.86
  -3   9   0   22.77    4.64
  -3   9   0   18.78    4.22
  -3   9   1   61.23    7.70
  -2  -9  -1   11.61    2.53
  -2  -9  -1   14.66    3.85
  -2  -9   0    9.38    2.35
  -2  -9   0    8.21    2.97
  -2  -9   0    2.94    2.03
  -2  -9   1   65.62    7.98
  -2  -9   1   69.69    6.73
  -2  -9   1   67.02    7.57
  -2  -9   2  144.14   11.72
  -2  -9   2  149.40   12.11
  -2  -9   2  159.34   10.70
  -2  -9   3   11.66    3.44
  -2  -9   3   15.39    3.62
  -2  -9   4  278.15   16.57
  -2  -9   4  288.63   15.87
  -2  -9   5    4.62    1.92
  -2  -9   5    7.17    2.51
  -2  -9   6    9.58    3.12
  -2  -9   6    7.37    2.35
  -2  -9   7    5.84    2.85
  -2  -9   7    0.87    1.03
  -2  -9   8   35.05    5.12
  -2  -9   8   37.51    5.80
  -2  -9   9  402.58   21.65
  -2  -9   9  396.74   19.51
  -2  -8  -4  105.79   10.90
  -2  -8  -3  234.28   15.93
  -2  -8  -3  219.57   10.63
  -2  -8  -2  460.53   19.27
  -2  -8  -2  478.82   17.93
  -2  -8  -2  483.57   23.72
  -2  -8  -1  165.57    9.41
  -2  -8  -1  134.88    9.78
  -2  -8  -1  151.63   12.20
  -2  -8   0   52.53    6.09
  -2  -8   0   55.84    5.43
  -2  -8   0   63.60    7.40
  -2  -8   1  329.47   17.36
  -2  -8   1  327.52   17.99
  -2  -8   1  344.58   15.53
  -2  -8   2 1410.58   46.34
  -2  -8   2 1389.87   43.04
  -2  -8   2 1445.42   46.76
  -2  -8   3  457.04   22.16
  -2  -8   3  486.78   20.49
  -2  -8   4  377.41   20.31
  -2  -8   4  421.13   19.89
  -2  -8   4  412.69   18.89
  -2  -8   5   40.41    6.36
  -2  -8   5   45.84    5.75
  -2  -8   5   51.46    6.14
  -2  -8   6  191.29   12.57
  -2  -8   6  174.03   11.90
  -2  -8   7   11.91    3.25
  -2  -8   7    9.30    2.61
  -2  -8   8  230.30   14.91
  -2  -8   8  257.82   14.30
  -2  -8   9   68.28    7.98
  -2  -8   9   72.42    7.04
  -2  -8  10  327.07   16.23
  -2  -8  10  289.79   17.87
  -2  -8  11  240.28   13.51
  -2  -8  11  241.65   16.32
  -2  -7  -6  213.28   15.36
  -2  -7  -5  304.17   17.27
  -2  -7  -5  373.19   20.25
  -2  -7  -4   25.20    4.80
  -2  -7  -4   24.03    2.55
  -2  -7  -4   21.92    4.32
  -2  -7  -4   26.55    2.83
  -2  -7  -3    9.85    3.28
  -2  -7  -3    6.14    1.62
  -2  -7  -3    7.34    1.62
  -2  -7  -3    6.01    2.34
  -2  -7  -3    3.53    1.53
  -2  -7  -2   20.22    4.11
  -2  -7  -2   15.12    2.74
  -2  -7  -2   21.51    3.81
  -2  -7  -2   21.51    4.30
  -2  -7  -2   16.32    2.51
  -2  -7  -1  123.11    8.54
  -2  -7  -1  126.03   10.31
  -2  -7  -1  126.45    9.28
  -2  -7  -1  132.90   10.66
  -2  -7  -1  127.96    7.65
  -2  -7   0  244.96   13.09
  -2  -7   0  254.99   13.75
  -2  -7   0  221.51   11.14
  -2  -7   0  221.88   14.55
  -2  -7   1  806.49   30.60
  -2  -7   1  887.45   30.56
  -2  -7   1  889.17   30.27
  -2  -7   1  782.63   31.83
  -2  -7   1  855.73   28.02
  -2  -7   2 1117.96   37.10
  -2  -7   2 1128.79   37.27
  -2  -7   2 1089.78   38.80
  -2  -7   2 1061.98   34.19
  -2  -7   2 1082.95   35.93
  -2  -7   3  690.76   29.16
  -2  -7   3  783.11   27.97
  -2  -7   3  775.57   29.26
  -2  -7   3  727.16   26.40
  -2  -7   3  784.40   28.47
  -2  -7   4  593.82   23.13
  -2  -7   4  553.90   24.29
  -2  -7   4  538.53   24.52
  -2  -7   4  539.12   21.81
  -2  -7   4  554.58   22.68
  -2  -7   5   98.18    8.10
  -2  -7   5   86.31    8.54
  -2  -7   5   96.88    9.02
  -2  -7   5   93.93    8.01
  -2  -7   5   86.54    7.80
  -2  -7   6  190.89   12.99
  -2  -7   6  166.77   12.47
  -2  -7   6  164.24   11.14
  -2  -7   6  195.19   12.05
  -2  -7   6  169.72   10.95
  -2  -7   7  483.16   23.30
  -2  -7   7  421.75   19.94
  -2  -7   7  420.62   21.26
  -2  -7   7  480.30   21.04
  -2  -7   7  476.68   19.79
  -2  -7   8  776.57   26.88
  -2  -7   8  683.92   27.81
  -2  -7   8  708.60   27.68
  -2  -7   8  693.73   28.81
  -2  -7   9  193.88   13.03
  -2  -7   9  180.61   12.59
  -2  -7   9  176.25   12.10
  -2  -7  10   42.19    5.99
  -2  -7  10   34.56    5.41
  -2  -7  11   72.13    7.61
  -2  -7  11   68.82    7.92
  -2  -7  11   70.14    6.41
  -2  -7  12   46.83    6.84
  -2  -6  -7  351.97   19.62
  -2  -6  -6  198.51   13.58
  -2  -6  -6  147.66   10.36
  -2  -6  -5  182.12   11.65
  -2  -6  -4  319.72   10.63
  -2  -6  -4  309.15   15.99
  -2  -6  -4  304.33   16.78
  -2  -6  -4  306.12   11.05
  -2  -6  -3    2.29    0.88
  -2  -6  -3    3.21    1.36
  -2  -6  -3    2.29    1.13
  -2  -6  -3    0.74    0.52
  -2  -6  -3    3.07    1.47
  -2  -6  -2  141.16    8.01
  -2  -6  -2  147.21   10.52
  -2  -6  -2  140.32    9.17
  -2  -6  -2  153.28    7.45
  -2  -6  -2  128.11    9.84
  -2  -6  -1 1052.81   32.28
  -2  -6  -1 1060.56   33.61
  -2  -6  -1 1099.60   30.67
  -2  -6  -1 1146.22   36.86
  -2  -6   0 1796.32   47.90
  -2  -6   0 1706.12   50.11
  -2  -6   0 1791.80   50.35
  -2  -6   0 1753.94   53.18
  -2  -6   1    3.44    1.53
  -2  -6   1    7.34    1.99
  -2  -6   1    4.65    1.39
  -2  -6   1    5.94    1.61
  -2  -6   1    7.39    2.16
  -2  -6   2  335.91   15.77
  -2  -6   2  330.66   16.89
  -2  -6   2  348.59   16.11
  -2  -6   2  329.63   14.25
  -2  -6   2  344.20   15.43
  -2  -6   3   97.81    7.40
  -2  -6   3   91.34    6.95
  -2  -6   3   88.70    7.67
  -2  -6   3   85.56    7.21
  -2  -6   3   94.00    8.27
  -2  -6   4   31.86    4.68
  -2  -6   4   26.88    3.86
  -2  -6   4   30.80    4.03
  -2  -6   4   25.52    3.78
  -2  -6   4   29.62    4.62
  -2  -6   5  253.76   14.36
  -2  -6   5  259.93   14.74
  -2  -6   5  268.44   13.52
  -2  -6   5  246.12   12.65
  -2  -6   5  242.54   12.84
  -2  -6   6   41.33    5.73
  -2  -6   6   46.93    5.29
  -2  -6   6   47.75    5.37
  -2  -6   6   47.46    5.85
  -2  -6   7   63.06    6.24
  -2  -6   7   55.30    5.96
  -2  -6   7   59.54    6.49
  -2  -6   7   50.15    6.55
  -2  -6   8 1057.34   35.09
  -2  -6   8 1030.92   35.44
  -2  -6   8 1063.03   35.72
  -2  -6   8 1022.08   37.92
  -2  -6   9  136.26   11.32
  -2  -6   9  140.80   10.07
  -2  -6   9  130.49   10.06
  -2  -6   9  124.53    9.64
  -2  -6  10  229.93   13.71
  -2  -6  10  248.45   14.67
  -2  -6  10  229.05   11.87
  -2  -6  10  243.53   13.62
  -2  -6  11  200.07   12.26
  -2  -6  11  197.96   12.88
  -2  -6  11  209.66   11.16
  -2  -6  11  222.76   14.12
  -2  -6  12  429.03   19.26
  -2  -6  12  482.87   22.87
  -2  -6  12  461.40   18.41
  -2  -6  13  138.65   11.66
  -2  -5  -9    3.86    2.18
  -2  -5  -8  114.92   10.01
  -2  -5  -7  607.91   25.50
  -2  -5  -7  568.80   21.40
  -2  -5  -6  587.29   22.01
  -2  -5  -6  589.69   24.73
  -2  -5  -5  679.00   27.10
  -2  -5  -5  747.52   25.89
  -2  -5  -4    2.83    0.75
  -2  -5  -4    2.62    0.54
  -2  -5  -4    4.04    1.61
  -2  -5  -4    4.53    1.70
  -2  -5  -3  174.40    7.61
  -2  -5  -3  172.63   10.60
  -2  -5  -3  204.34   10.44
  -2  -5  -3  185.50   11.23
  -2  -5  -3  181.56    7.33
  -2  -5  -2  635.71   20.04
  -2  -5  -2  602.36   23.39
  -2  -5  -2  666.40   22.44
  -2  -5  -2  620.74   23.65
  -2  -5  -2  649.46   19.17
  -2  -5  -1 2934.26   80.61
  -2  -5  -1 2830.33   79.78
  -2  -5  -1 3060.89   75.40
  -2  -5  -1 3014.17   76.79
  -2  -5   0  298.40   14.20
  -2  -5   0  296.48   12.96
  -2  -5   0  301.82   14.81
  -2  -5   0  303.18   13.26
  -2  -5   0  309.86   13.43
  -2  -5   0  323.84   12.17
  -2  -5   1  321.13   15.29
  -2  -5   1  336.43   14.37
  -2  -5   1  324.37   14.64
  -2  -5   1  327.35   13.27
  -2  -5   1  339.48   13.05
  -2  -5   1  302.41   13.56
  -2  -5   2   28.65    3.96
  -2  -5   2   32.78    3.24
  -2  -5   2   29.37    3.72
  -2  -5   2   28.45    3.30
  -2  -5   2   33.21    3.99
  -2  -5   2   31.50    4.30
  -2  -5   3    6.23    1.70
  -2  -5   3    5.59    1.73
  -2  -5   3    8.53    1.82
  -2  -5   3   10.95    2.49
  -2  -5   4   85.46    7.27
  -2  -5   4   85.97    7.13
  -2  -5   4   91.52    6.82
  -2  -5   4   81.08    6.21
  -2  -5   5  102.99    8.15
  -2  -5   5   86.35    6.72
  -2  -5   5   94.16    7.57
  -2  -5   5   83.94    6.52
  -2  -5   6  153.98    9.81
  -2  -5   6  155.08    9.54
  -2  -5   6  166.43   11.04
  -2  -5   6  147.21    9.22
  -2  -5   7  644.94   24.37
  -2  -5   7  667.20   24.64
  -2  -5   7  668.02   24.38
  -2  -5   8 2000.20   57.45
  -2  -5   8 1928.30   60.32
  -2  -5   8 1999.83   57.83
  -2  -5   9 1133.96   33.85
  -2  -5   9 1216.68   40.08
  -2  -5   9 1025.86   34.75
  -2  -5   9 1086.89   36.10
  -2  -5   9 1175.33   37.42
  -2  -5  10    7.10    2.42
  -2  -5  10    8.55    1.97
  -2  -5  10    8.25    2.11
  -2  -5  10    6.74    1.94
  -2  -5  10    9.20    2.81
  -2  -5  11    5.91    2.26
  -2  -5  11    2.22    1.30
  -2  -5  11    4.08    1.32
  -2  -5  11    6.89    3.09
  -2  -5  11    0.54    0.78
  -2  -5  12   36.41    4.23
  -2  -5  12   40.99    4.48
  -2  -5  12   48.01    6.22
  -2  -5  12   33.36    4.90
  -2  -5  13  560.54   25.33
  -2  -4 -10   97.07    9.25
  -2  -4  -9   85.20    8.30
  -2  -4  -8   80.63    5.57
  -2  -4  -8   88.68    8.06
  -2  -4  -7   10.87    2.02
  -2  -4  -7   10.83    2.83
  -2  -4  -6    6.82    2.12
  -2  -4  -6    7.68    1.85
  -2  -4  -5  400.11   17.68
  -2  -4  -5  406.26   16.12
  -2  -4  -4  197.85   10.37
  -2  -4  -4  207.65   11.38
  -2  -4  -4  204.11    6.63
  -2  -4  -3  125.61    8.41
  -2  -4  -3  137.82    8.92
  -2  -4  -3  145.13    7.80
  -2  -4  -3  139.90    5.50
  -2  -4  -3  135.47    5.34
  -2  -4  -3  146.09    8.63
  -2  -4  -2 1317.47   37.37
  -2  -4  -2 1224.59   32.53
  -2  -4  -2 1190.98   36.37
  -2  -4  -2 1203.52   36.61
  -2  -4  -2 1201.03   34.65
  -2  -4  -2 1217.58   31.61
  -2  -4  -1 2763.10   69.94
  -2  -4  -1 2792.22   73.47
  -2  -4  -1 2758.83   72.46
  -2  -4  -1 2758.86   71.15
  -2  -4  -1 2865.42   68.83
  -2  -4  -1 2821.29   73.16
  -2  -4   0 3057.35   81.49
  -2  -4   0 3204.43   80.97
  -2  -4   0 3253.69   81.56
  -2  -4   0 3219.91   83.04
  -2  -4   0 3253.14   79.66
  -2  -4   1  298.06   12.79
  -2  -4   1  307.22   12.44
  -2  -4   1  297.20   11.70
  -2  -4   1  284.85   11.98
  -2  -4   1  307.75   13.54
  -2  -4   1  280.59   11.11
  -2  -4   2  835.62   24.69
  -2  -4   2  865.08   27.32
  -2  -4   2  821.87   23.92
  -2  -4   2  816.93   25.42
  -2  -4   2  779.47   25.81
  -2  -4   3 1799.86   48.01
  -2  -4   3 1815.77   46.77
  -2  -4   3 1661.64   47.51
  -2  -4   3 1662.27   43.10
  -2  -4   3 1592.51   45.21
  -2  -4   4 1210.45   36.57
  -2  -4   4 1254.76   38.30
  -2  -4   4 1298.63   32.60
  -2  -4   4 1333.06   36.78
  -2  -4   4 1248.45   37.67
  -2  -4   5 3248.73   83.82
  -2  -4   5 3502.87   85.06
  -2  -4   5 3409.69   84.06
  -2  -4   5 3153.10   85.70
  -2  -4   6  414.56   16.65
  -2  -4   6  437.01   18.51
  -2  -4   6  416.73   16.70
  -2  -4   6  431.06   16.88
  -2  -4   7   99.36    7.37
  -2  -4   7  107.42    7.46
  -2  -4   7  115.16    8.69
  -2  -4   7   90.59    6.70
  -2  -4   8 1623.87   45.66
  -2  -4   8 1755.84   48.67
  -2  -4   8 1549.99   49.70
  -2  -4   8 1751.11   48.92
  -2  -4   8 1668.59   46.74
  -2  -4   9  237.01   11.18
  -2  -4   9  211.84   13.16
  -2  -4   9  241.61   11.14
  -2  -4   9  205.93   11.83
  -2  -4   9  226.27   12.58
  -2  -4  10  100.81    8.07
  -2  -4  10   89.68    8.41
  -2  -4  10   96.39    6.50
  -2  -4  10   89.24    7.74
  -2  -4  10   81.93    6.24
  -2  -4  11   52.54    6.52
  -2  -4  11   55.34    6.09
  -2  -4  11   54.10    6.20
  -2  -4  11   53.05    4.57
  -2  -4  11   50.30    4.93
  -2  -4  12   45.56    5.82
  -2  -4  12   41.88    6.06
  -2  -4  12   45.99    5.77
  -2  -4  12   39.02    3.48
  -2  -4  12   33.89    3.98
  -2  -4  13   55.75    6.62
  -2  -4  14  128.24   10.74
  -2  -3 -11  103.69    9.14
  -2  -3 -10    9.24    2.45
  -2  -3  -9  204.77   12.21
  -2  -3  -8  723.95   21.36
  -2  -3  -8  776.88   27.27
  -2  -3  -7  227.08    9.48
  -2  -3  -7  213.33   11.90
  -2  -3  -6  111.83    6.41
  -2  -3  -5   88.53    6.66
  -2  -3  -5   94.12    7.54
  -2  -3  -5   88.13    5.78
  -2  -3  -4  284.09   11.70
  -2  -3  -4  267.16   13.07
  -2  -3  -4  263.92   12.25
  -2  -3  -3  137.00    8.02
  -2  -3  -3  128.53    8.22
  -2  -3  -3  155.18    7.20
  -2  -3  -3  150.60    7.96
  -2  -3  -2  566.63   16.18
  -2  -3  -2  577.55   19.62
  -2  -3  -2  633.42   20.85
  -2  -3  -2  560.26   18.11
  -2  -3  -2  615.70   20.31
  -2  -3  -2  608.18   15.94
  -2  -3  -1 2146.50   54.90
  -2  -3  -1 2173.26   53.66
  -2  -3  -1 2119.27   56.58
  -2  -3  -1 2122.81   56.59
  -2  -3  -1 2189.18   52.94
  -2  -3  -1 2153.82   56.65
  -2  -3   0    6.52    1.22
  -2  -3   0    6.48    1.51
  -2  -3   0    5.33    1.41
  -2  -3   0    7.96    1.42
  -2  -3   0    4.44    0.89
  -2  -3   1  678.09   20.60
  -2  -3   1  659.31   19.36
  -2  -3   1  641.58   19.90
  -2  -3   1  639.74   20.18
  -2  -3   1  718.71   22.00
  -2  -3   2 2567.25   67.90
  -2  -3   2 2841.00   70.63
  -2  -3   2 3021.90   71.67
  -2  -3   2 2730.76   69.67
  -2  -3   2 2861.31   69.17
  -2  -3   3  108.61    6.68
  -2  -3   3   99.05    6.31
  -2  -3   3  109.18    4.95
  -2  -3   3   86.31    5.61
  -2  -3   3  108.52    6.02
  -2  -3   4  693.48   22.47
  -2  -3   4  715.46   19.02
  -2  -3   4  686.39   23.16
  -2  -3   4  685.45   22.18
  -2  -3   4  713.86   22.09
  -2  -3   5 2306.26   63.27
  -2  -3   5 2360.83   61.72
  -2  -3   5 2388.90   62.17
  -2  -3   5 2434.84   62.09
  -2  -3   5 2435.22   57.29
  -2  -3   6 1784.68   44.47
  -2  -3   6 1901.10   50.18
  -2  -3   6 1798.91   48.60
  -2  -3   6 1806.44   51.28
  -2  -3   6 1721.76   49.27
  -2  -3   7  826.75   25.22
  -2  -3   7  810.33   22.05
  -2  -3   7  843.42   28.28
  -2  -3   7  836.03   26.91
  -2  -3   7  854.89   25.43
  -2  -3   7  794.23   26.47
  -2  -3   8   12.09    2.64
  -2  -3   8   10.76    1.58
  -2  -3   8   12.36    2.20
  -2  -3   8   13.05    2.05
  -2  -3   8   10.50    2.20
  -2  -3   8   10.81    1.28
  -2  -3   8    9.75    2.24
  -2  -3   8   13.07    1.43
  -2  -3   9   77.93    5.78
  -2  -3   9   67.27    6.52
  -2  -3   9   71.19    3.94
  -2  -3   9   64.85    4.35
  -2  -3   9   70.36    6.22
  -2  -3   9   64.18    3.87
  -2  -3   9   69.48    6.20
  -2  -3   9   70.22    4.85
  -2  -3  10   27.87    3.51
  -2  -3  10   30.36    2.76
  -2  -3  10   32.71    4.75
  -2  -3  10   30.90    2.83
  -2  -3  10   35.14    4.46
  -2  -3  10   28.75    4.16
  -2  -3  10   29.07    2.85
  -2  -3  11  282.36   13.01
  -2  -3  11  266.88   10.53
  -2  -3  11  286.59   14.64
  -2  -3  11  270.19   15.17
  -2  -3  11  283.68   14.83
  -2  -3  11  274.50   10.89
  -2  -3  11  277.05    9.90
  -2  -3  12  564.60   21.38
  -2  -3  12  592.35   19.44
  -2  -3  12  589.72   23.96
  -2  -3  12  617.84   24.43
  -2  -3  12  575.32   18.87
  -2  -3  13  247.81   12.76
  -2  -3  13  268.30   11.36
  -2  -3  13  241.09   14.47
  -2  -3  13  278.44   15.43
  -2  -3  14 1200.40   41.18
  -2  -2 -11  169.21   10.86
  -2  -2 -10  703.08   25.49
  -2  -2  -9 1047.69   33.40
  -2  -2  -8   14.54    2.75
  -2  -2  -7   22.09    3.12
  -2  -2  -7   24.85    3.96
  -2  -2  -7   22.29    2.18
  -2  -2  -6  121.91    8.63
  -2  -2  -6  142.39    6.48
  -2  -2  -5   39.53    4.47
  -2  -2  -5   40.34    3.86
  -2  -2  -5   38.20    3.23
  -2  -2  -4    7.23    1.36
  -2  -2  -4    9.43    1.76
  -2  -2  -4    6.06    1.73
  -2  -2  -3 4495.89  107.91
  -2  -2  -3 4465.40  110.29
  -2  -2  -3 4464.01  106.20
  -2  -2  -3 4384.19  108.56
  -2  -2  -2  102.78    5.71
  -2  -2  -2  102.67    6.37
  -2  -2  -2  110.88    5.03
  -2  -2  -2  100.02    3.38
  -2  -2  -2   94.76    5.69
  -2  -2  -1 1218.04   32.53
  -2  -2  -1 1165.79   29.81
  -2  -2  -1 1167.07   32.84
  -2  -2  -1 1210.73   30.92
  -2  -2  -1 1163.07   29.22
  -2  -2   0   84.79    5.08
  -2  -2   0   92.08    5.19
  -2  -2   0   76.78    4.26
  -2  -2   0   82.21    3.89
  -2  -2   0   78.98    4.22
  -2  -2   1  579.27   17.99
  -2  -2   1  583.18   17.24
  -2  -2   1  561.54   17.07
  -2  -2   1  548.11   16.89
  -2  -2   2 1415.90   38.01
  -2  -2   2 1440.69   38.59
  -2  -2   2 1450.56   38.48
  -2  -2   2 1475.34   37.23
  -2  -2   3 1091.09   29.76
  -2  -2   3 1040.19   30.16
  -2  -2   3 1077.08   28.06
  -2  -2   3 1043.06   29.61
  -2  -2   4   29.52    2.88
  -2  -2   4   24.52    2.96
  -2  -2   4   23.78    2.71
  -2  -2   4   26.43    2.27
  -2  -2   5  611.80   18.43
  -2  -2   5  662.25   17.54
  -2  -2   5  609.64   19.30
  -2  -2   5  614.35   21.13
  -2  -2   5  659.34   20.73
  -2  -2   5  671.62   20.03
  -2  -2   6 1409.03   36.45
  -2  -2   6 1499.24   39.37
  -2  -2   6 1409.16   40.98
  -2  -2   6 1505.86   40.49
  -2  -2   6 1423.39   37.99
  -2  -2   7  212.09    8.34
  -2  -2   7  229.86   11.46
  -2  -2   7  227.30   10.77
  -2  -2   7  233.41   10.15
  -2  -2   7  221.59    8.84
  -2  -2   8  654.54   23.04
  -2  -2   8  615.28   18.81
  -2  -2   8  618.85   18.83
  -2  -2   8  629.87   18.37
  -2  -2   8  636.42   20.93
  -2  -2   8  582.49   21.50
  -2  -2   9  356.39   13.06
  -2  -2   9  385.99   16.60
  -2  -2   9  345.55   11.49
  -2  -2   9  366.32   13.25
  -2  -2   9  388.30   15.11
  -2  -2   9  363.16   15.62
  -2  -2  10  217.17   11.91
  -2  -2  10  216.05   10.96
  -2  -2  10  215.29    9.97
  -2  -2  10  222.59   10.01
  -2  -2  11   53.99    4.71
  -2  -2  11   47.95    4.95
  -2  -2  11   58.46    6.01
  -2  -2  11   55.99    5.82
  -2  -2  11   58.43    5.07
  -2  -2  12  949.88   32.65
  -2  -2  12  904.27   29.70
  -2  -2  12  937.42   30.72
  -2  -2  12  909.73   32.09
  -2  -2  12  938.15   29.47
  -2  -2  13  231.45   13.91
  -2  -2  13  265.75   14.70
  -2  -2  13  253.33   12.50
  -2  -2  13  228.45   12.72
  -2  -2  14  173.58   12.06
  -2  -1 -12   20.82    3.47
  -2  -1 -11  135.63    8.71
  -2  -1 -10  386.16   15.84
  -2  -1  -9  260.76   11.92
  -2  -1  -8  993.65   33.17
  -2  -1  -8 1017.92   30.09
  -2  -1  -7  478.20   16.55
  -2  -1  -7  460.33   18.75
  -2  -1  -6  155.71    9.18
  -2  -1  -6  156.66    7.70
  -2  -1  -5    3.72    1.10
  -2  -1  -5    2.04    1.10
  -2  -1  -5    4.35    0.89
  -2  -1  -4    9.62    1.91
  -2  -1  -4   10.88    1.63
  -2  -1  -4    9.85    1.41
  -2  -1  -3 5467.65  132.65
  -2  -1  -2  415.94   11.07
  -2  -1  -2  436.12   12.84
  -2  -1  -1 3777.51   94.72
  -2  -1  -1 4050.23   92.15
  -2  -1  -1 3749.35   93.59
  -2  -1   0 5419.46  128.80
  -2  -1   1 1361.78   33.70
  -2  -1   1 1417.99   34.54
  -2  -1   2 1023.03   28.04
  -2  -1   2 1004.06   28.06
  -2  -1   3  313.03   11.06
  -2  -1   3  326.35   11.26
  -2  -1   3  320.66   10.14
  -2  -1   3  326.90   11.34
  -2  -1   3  320.86   10.78
  -2  -1   4  399.96   13.59
  -2  -1   4  377.81   12.00
  -2  -1   4  409.77   13.36
  -2  -1   4  363.77   12.06
  -2  -1   5 3248.77   79.89
  -2  -1   5 3195.47   81.82
  -2  -1   5 3219.29   81.32
  -2  -1   5 3404.44   79.64
  -2  -1   6 2569.18   64.72
  -2  -1   6 2555.85   66.13
  -2  -1   6 2645.90   66.98
  -2  -1   6 2629.13   63.48
  -2  -1   7   60.71    4.39
  -2  -1   7   65.00    5.24
  -2  -1   8   56.01    4.53
  -2  -1   8   58.86    5.21
  -2  -1   8   50.85    4.64
  -2  -1   8   52.96    4.33
  -2  -1   9  590.14   20.77
  -2  -1   9  568.75   19.75
  -2  -1   9  582.03   19.86
  -2  -1   9  531.15   20.64
  -2  -1  10  328.54   14.25
  -2  -1  10  312.01   14.92
  -2  -1  10  347.57   14.50
  -2  -1  10  318.70   14.54
  -2  -1  11  116.38    8.13
  -2  -1  11  116.24    8.67
  -2  -1  11  100.19    7.80
  -2  -1  11  112.48    7.92
  -2  -1  12  156.76   10.34
  -2  -1  12  168.90   10.39
  -2  -1  12  155.06   10.70
  -2  -1  12  165.66   10.48
  -2  -1  12  177.13   10.89
  -2  -1  13   23.11    3.85
  -2  -1  13   16.45    3.54
  -2  -1  13   17.13    3.43
  -2  -1  13   14.09    3.01
  -2  -1  13   16.47    3.22
  -2   0 -12  212.30   10.34
  -2   0 -11  139.65    7.87
  -2   0 -10  747.90   23.31
  -2   0  -9   29.10    4.12
  -2   0  -8   74.82    4.71
  -2   0  -8   75.56    6.35
  -2   0  -7 1015.31   28.07
  -2   0  -7 1039.02   31.97
  -2   0  -6 2033.80   55.22
  -2   0  -6 2060.58   51.31
  -2   0  -5   45.58    2.99
  -2   0  -5   42.25    4.01
  -2   0  -4 2407.83   61.10
  -2   0  -4 2337.72   57.63
  -2   0  -4 2450.84   56.19
  -2   0  -3 6951.80  165.85
  -2   0  -2 4087.04   99.29
  -2   0  -1  181.61    7.71
  -2   0  -1  176.57    5.46
  -2   0  -1  183.08    5.81
  -2   0   0   30.38    2.70
  -2   0   0   27.62    1.87
  -2   0   0   25.80    1.81
  -2   0   1 3617.33   88.13
  -2   0   1 3779.40   89.66
  -2   0   1 3684.31   88.15
  -2   0   2  533.64   15.91
  -2   0   2  524.37   15.56
  -2   0   3 5427.84  129.65
  -2   0   4   99.63    5.56
  -2   0   4   79.97    4.75
  -2   0   5  499.61   16.92
  -2   0   5  569.40   18.00
  -2   0   6  907.44   26.85
  -2   0   6  894.65   27.21
  -2   0   7   12.95    2.25
  -2   0   7    9.97    1.97
  -2   0   8    9.53    2.03
  -2   0   8    7.87    1.86
  -2   0   8    8.30    1.83
  -2   0   9  339.18   14.80
  -2   0   9  322.59   14.60
  -2   0   9  325.93   14.53
  -2   0   9  307.94   13.51
  -2   0  10    2.03    0.91
  -2   0  10    1.21    0.94
  -2   0  10    5.30    1.82
  -2   0  10    1.68    1.00
  -2   0  10    4.03    1.44
  -2   0  11  219.93   12.43
  -2   0  11  180.47   11.41
  -2   0  11  202.09   10.93
  -2   0  11  209.40   12.15
  -2   0  11  188.73   11.81
  -2   0  12  107.75    8.89
  -2   0  12  111.83    8.90
  -2   0  12  103.86    7.75
  -2   0  12  106.87    8.86
  -2   0  12   89.18    8.25
  -2   0  13    8.59    2.68
  -2   1 -11    1.85    0.65
  -2   1 -10 1322.19   34.61
  -2   1  -9   34.20    2.66
  -2   1  -9   36.91    4.21
  -2   1  -8    1.95    0.63
  -2   1  -8    1.11    0.98
  -2   1  -7  156.54    5.71
  -2   1  -7  149.82    8.41
  -2   1  -6  106.06    4.04
  -2   1  -6  108.24    6.61
  -2   1  -5  114.50    6.55
  -2   1  -5  109.50    5.00
  -2   1  -5  112.80    3.84
  -2   1  -4  437.22   15.37
  -2   1  -4  465.86   13.65
  -2   1  -4  468.94   11.89
  -2   1  -3   68.03    4.50
  -2   1  -3   69.61    3.59
  -2   1  -2  117.03    4.19
  -2   1  -2  116.62    3.76
  -2   1  -2  112.58    5.91
  -2   1  -2  115.26    4.81
  -2   1   0  817.07   24.62
  -2   1   0  876.60   24.13
  -2   1   1   58.93    3.71
  -2   1   1   58.83    3.43
  -2   1   1   64.61    3.75
  -2   1   2  479.97   15.44
  -2   1   2  506.61   15.68
  -2   1   2  500.39   15.03
  -2   1   3 8022.87  190.23
  -2   1   4  153.63    7.87
  -2   1   4  177.72    8.38
  -2   1   4  172.84    7.51
  -2   1   5  782.28   24.64
  -2   1   5  751.52   23.08
  -2   1   6  306.60   13.23
  -2   1   6  302.10   13.21
  -2   1   6  322.40   12.19
  -2   1   7  123.33    8.00
  -2   1   7  131.14    8.17
  -2   1   7  117.75    6.90
  -2   1   8  692.19   24.49
  -2   1   8  700.08   24.57
  -2   1   8  673.82   24.44
  -2   1   8  686.37   22.43
  -2   1   9  681.65   25.36
  -2   1   9  698.87   25.33
  -2   1   9  656.69   24.86
  -2   1   9  688.83   22.97
  -2   1  10  304.87   15.76
  -2   1  10  315.40   16.04
  -2   1  10  318.98   13.87
  -2   1  11    2.70    1.73
  -2   1  11    2.80    1.56
  -2   1  11    2.50    1.82
  -2   1  11    1.84    1.26
  -2   1  12  743.81   29.52
  -2   1  12  731.70   25.72
  -2   1  13   23.19    4.35
  -2   2 -10  466.08   17.97
  -2   2  -9    4.49    1.50
  -2   2  -8  346.94   13.90
  -2   2  -7    1.77    0.78
  -2   2  -6  683.82   20.52
  -2   2  -6  674.89   21.21
  -2   2  -5  147.89    7.38
  -2   2  -5  160.13    5.44
  -2   2  -5  160.51    7.19
  -2   2  -4  426.73   14.39
  -2   2  -4  423.91   11.81
  -2   2  -4  399.14   13.54
  -2   2  -3    7.88    1.38
  -2   2  -3    6.42    1.35
  -2   2  -3    6.72    0.71
  -2   2  -3    4.99    0.77
  -2   2  -2 2813.26   70.75
  -2   2  -2 3079.97   74.01
  -2   2  -2 2890.14   72.30
  -2   2  -2 2961.25   70.52
  -2   2  -1  372.31   11.70
  -2   2  -1  379.37   12.57
  -2   2  -1  356.34   13.39
  -2   2  -1  392.21   11.81
  -2   2  -1  410.03   12.63
  -2   2   0    4.55    0.98
  -2   2   0    5.61    1.13
  -2   2   0    4.97    0.98
  -2   2   1 1755.37   44.88
  -2   2   1 1655.33   45.01
  -2   2   1 1783.06   44.35
  -2   2   2 1625.00   41.73
  -2   2   2 1503.16   41.54
  -2   2   2 1550.06   40.38
  -2   2   3  134.02    7.28
  -2   2   3  122.32    6.99
  -2   2   3  119.46    6.15
  -2   2   4  345.86   13.96
  -2   2   4  359.24   14.21
  -2   2   4  344.21   12.54
  -2   2   5   51.86    4.97
  -2   2   5   65.48    5.38
  -2   2   5   57.53    4.35
  -2   2   6    2.88    0.97
  -2   2   6    3.02    1.05
  -2   2   6    3.03    1.20
  -2   2   7 1586.75   47.32
  -2   2   7 1642.09   44.52
  -2   2   7 1666.58   48.35
  -2   2   8 2059.94   58.75
  -2   2   8 2123.74   59.47
  -2   2   8 1960.49   57.92
  -2   2   8 2054.78   54.77
  -2   2   9  392.66   18.97
  -2   2   9  409.91   19.15
  -2   2   9  429.24   19.13
  -2   2   9  408.20   16.03
  -2   2  10 1225.13   41.78
  -2   2  10 1197.00   41.69
  -2   2  10 1261.13   41.30
  -2   2  10 1271.08   37.32
  -2   2  11   38.47    4.44
  -2   2  11   41.12    6.06
  -2   2  12  211.26   14.83
  -2   2  12  209.51   13.28
  -2   3 -10  283.66   12.14
  -2   3  -9  628.69   20.70
  -2   3  -8  873.89   26.04
  -2   3  -7 1538.95   40.65
  -2   3  -7 1498.60   38.45
  -2   3  -7 1483.34   41.48
  -2   3  -6 3883.81   97.46
  -2   3  -6 3958.88   94.62
  -2   3  -6 3994.74   96.58
  -2   3  -5 1572.72   39.90
  -2   3  -5 1631.57   41.68
  -2   3  -4 1375.07   36.68
  -2   3  -4 1421.88   38.47
  -2   3  -3  232.02   10.12
  -2   3  -3  244.38    9.05
  -2   3  -3  256.07    8.22
  -2   3  -3  250.48   10.17
  -2   3  -2 2868.75   74.46
  -2   3  -2 3063.73   72.03
  -2   3  -2 3000.73   73.14
  -2   3  -2 2865.10   72.48
  -2   3  -2 2960.17   73.72
  -2   3  -1  522.20   16.63
  -2   3  -1  506.87   16.60
  -2   3  -1  514.17   16.11
  -2   3  -1  515.66   16.01
  -2   3   0  723.52   22.83
  -2   3   0  765.16   22.53
  -2   3   0  763.30   22.67
  -2   3   0  813.37   23.02
  -2   3   1  671.00   22.06
  -2   3   1  763.27   22.24
  -2   3   1  733.15   22.32
  -2   3   1  692.06   21.40
  -2   3   2  506.98   16.72
  -2   3   2  484.17   16.72
  -2   3   2  484.52   15.29
  -2   3   3 2898.71   73.09
  -2   3   3 2902.85   70.65
  -2   3   4   17.92    2.43
  -2   3   4   24.33    3.32
  -2   3   4   17.64    3.00
  -2   3   4   23.19    3.03
  -2   3   5  211.44   11.58
  -2   3   5  207.28   10.63
  -2   3   5  212.99    9.71
  -2   3   5  199.30   11.15
  -2   3   6  361.82   16.10
  -2   3   6  324.95   14.62
  -2   3   6  311.82   15.44
  -2   3   6  329.42   13.26
  -2   3   7   16.82    3.19
  -2   3   7   14.62    2.51
  -2   3   7   14.01    3.15
  -2   3   7   17.34    3.18
  -2   3   7   16.60    3.35
  -2   3   8  163.02   11.00
  -2   3   8  144.93    9.88
  -2   3   8  167.41   11.47
  -2   3   8  149.50    8.61
  -2   3   8  156.41   11.08
  -2   3   9  192.14   12.61
  -2   3   9  209.34   13.66
  -2   3   9  183.31   11.63
  -2   3   9  198.57   10.32
  -2   3   9  194.24   13.17
  -2   3  10   76.29    8.28
  -2   3  10   79.04    7.49
  -2   3  10   65.01    5.76
  -2   3  11   46.52    6.87
  -2   3  11   53.29    6.54
  -2   4 -10    5.70    1.32
  -2   4  -9    7.39    1.50
  -2   4  -8  382.99   13.44
  -2   4  -8  380.88   13.48
  -2   4  -8  397.18   16.06
  -2   4  -7  234.01    9.54
  -2   4  -7  235.74    9.67
  -2   4  -7  235.37   11.44
  -2   4  -6 1387.47   36.78
  -2   4  -6 1336.31   36.76
  -2   4  -6 1359.63   39.12
  -2   4  -5 1514.35   41.75
  -2   4  -5 1641.87   42.51
  -2   4  -5 1598.43   44.05
  -2   4  -4 1215.94   35.10
  -2   4  -4 1236.61   32.58
  -2   4  -4 1222.35   36.02
  -2   4  -3  298.74   12.56
  -2   4  -3  335.47   12.24
  -2   4  -3  302.73   11.52
  -2   4  -3  321.45   12.98
  -2   4  -3  313.34   11.05
  -2   4  -2  764.10   22.38
  -2   4  -2  779.93   21.96
  -2   4  -2  718.69   22.26
  -2   4  -1  608.28   19.43
  -2   4  -1  563.21   19.37
  -2   4  -1  596.91   19.55
  -2   4   0 2340.76   61.39
  -2   4   0 2319.30   61.69
  -2   4   0 2404.65   61.48
  -2   4   0 2408.59   61.51
  -2   4   1 3436.36   83.00
  -2   4   1 3332.10   82.53
  -2   4   1 3440.72   81.76
  -2   4   2    4.02    1.41
  -2   4   2    3.42    1.23
  -2   4   2    5.48    1.64
  -2   4   2    4.25    1.46
  -2   4   3 1127.51   35.37
  -2   4   3 1147.17   34.68
  -2   4   3 1103.29   35.53
  -2   4   3 1228.38   33.90
  -2   4   4  378.48   16.04
  -2   4   4  340.62   14.71
  -2   4   4  362.14   13.77
  -2   4   5  422.49   19.15
  -2   4   5  435.69   17.98
  -2   4   5  434.93   18.78
  -2   4   5  453.62   16.75
  -2   4   6  148.95   10.37
  -2   4   6  165.25   10.32
  -2   4   6  147.65   10.58
  -2   4   6  153.14    8.70
  -2   4   6  158.52   11.11
  -2   4   7  578.58   24.56
  -2   4   7  664.69   26.49
  -2   4   7  603.21   25.29
  -2   4   7  602.10   23.70
  -2   4   7  611.90   21.49
  -2   4   8  115.76    9.01
  -2   4   8  111.92    9.99
  -2   4   8  104.30    7.33
  -2   4   9   41.68    4.63
  -2   4   9   51.69    7.04
  -2   4   9   53.86    6.31
  -2   4  10   16.61    3.93
  -2   4  10   11.32    3.45
  -2   5 -10   84.85    5.83
  -2   5 -10   73.83    4.37
  -2   5  -9  601.84   18.28
  -2   5  -9  624.58   20.52
  -2   5  -9  627.73   23.47
  -2   5  -8  185.64    7.91
  -2   5  -8  155.82    9.94
  -2   5  -8  174.85    8.93
  -2   5  -7  147.99    8.18
  -2   5  -7  155.09    9.50
  -2   5  -7  149.94    7.10
  -2   5  -6  515.81   16.71
  -2   5  -6  470.40   17.28
  -2   5  -6  477.86   18.91
  -2   5  -5  160.34    8.67
  -2   5  -5  173.50    8.65
  -2   5  -4  128.87    7.70
  -2   5  -4  126.80    6.72
  -2   5  -4  123.97    7.39
  -2   5  -4  123.62    8.05
  -2   5  -3  811.11   23.44
  -2   5  -3  816.60   24.60
  -2   5  -3  816.85   23.60
  -2   5  -2  137.31    7.69
  -2   5  -2  137.45    8.37
  -2   5  -2  124.18    7.62
  -2   5  -2  142.75    7.80
  -2   5  -1   88.27    6.27
  -2   5  -1   96.84    6.67
  -2   5  -1   97.18    6.94
  -2   5  -1  101.23    6.76
  -2   5   0   62.32    5.42
  -2   5   0   74.11    5.84
  -2   5   0   63.78    5.38
  -2   5   0   70.94    5.75
  -2   5   1 1197.12   35.96
  -2   5   1 1111.19   35.25
  -2   5   1 1113.91   34.87
  -2   5   1 1199.72   34.88
  -2   5   2  207.62   11.48
  -2   5   2  193.43   11.22
  -2   5   2  190.06   10.78
  -2   5   2  219.71   10.78
  -2   5   3  290.65   14.65
  -2   5   3  295.75   14.25
  -2   5   3  300.96   15.02
  -2   5   3  286.58   13.04
  -2   5   4  651.11   25.98
  -2   5   4  674.57   25.91
  -2   5   4  689.20   25.21
  -2   5   4  686.22   23.39
  -2   5   5  288.88   15.38
  -2   5   5  235.35   14.57
  -2   5   5  295.45   14.80
  -2   5   5  270.34   15.06
  -2   5   5  247.73   12.24
  -2   5   6  197.77   13.33
  -2   5   6  204.29   13.22
  -2   5   6  212.36   13.85
  -2   5   6  192.53   12.25
  -2   5   6  209.85   11.06
  -2   5   7  891.58   34.26
  -2   5   7  846.99   31.72
  -2   5   7  879.20   28.95
  -2   5   8  125.81   11.44
  -2   5   8  109.24    8.05
  -2   5   9  793.83   34.49
  -2   5   9  849.38   32.52
  -2   6 -11  140.02    8.61
  -2   6 -10   35.42    4.07
  -2   6  -9  133.02    8.34
  -2   6  -9  129.96    5.40
  -2   6  -9  128.84    9.65
  -2   6  -8  446.72   14.14
  -2   6  -8  449.63   17.72
  -2   6  -8  418.16   19.02
  -2   6  -7 1093.96   33.45
  -2   6  -7 1050.04   30.03
  -2   6  -7 1095.66   35.54
  -2   6  -6  965.94   30.79
  -2   6  -6 1005.41   29.08
  -2   6  -6  923.56   31.99
  -2   6  -5  140.45    7.26
  -2   6  -5  138.32    8.64
  -2   6  -5  122.98    8.89
  -2   6  -5  123.37    7.70
  -2   6  -4    6.50    1.98
  -2   6  -4    6.63    1.71
  -2   6  -4    6.27    1.90
  -2   6  -4    9.59    1.91
  -2   6  -3  311.21   13.32
  -2   6  -3  316.72   14.43
  -2   6  -3  319.55   13.69
  -2   6  -3  347.34   15.52
  -2   6  -2  156.54    9.01
  -2   6  -2  160.79    9.38
  -2   6  -2  165.02   10.00
  -2   6  -2  160.72    9.71
  -2   6  -1  131.16    8.67
  -2   6  -1  122.64    8.46
  -2   6  -1  122.37    8.17
  -2   6  -1  117.26    8.37
  -2   6   0  837.75   28.20
  -2   6   0  826.20   28.38
  -2   6   0  829.20   28.00
  -2   6   0  812.67   28.38
  -2   6   1   65.38    6.30
  -2   6   1   65.73    6.35
  -2   6   1   72.90    6.37
  -2   6   1   79.89    7.09
  -2   6   2  339.32   16.65
  -2   6   2  308.17   15.75
  -2   6   2  357.74   17.19
  -2   6   2  351.06   15.63
  -2   6   3  396.42   19.01
  -2   6   3  405.07   18.57
  -2   6   3  418.76   17.60
  -2   6   3  399.55   19.17
  -2   6   4    9.42    3.05
  -2   6   4   18.07    3.17
  -2   6   4   20.24    4.01
  -2   6   4   16.74    3.51
  -2   6   4   14.57    3.48
  -2   6   5   36.70    4.61
  -2   6   5   46.20    5.94
  -2   6   6  210.78   13.56
  -2   6   6  214.53   14.86
  -2   6   6  194.07   11.58
  -2   6   7   63.92    8.20
  -2   6   7   52.11    5.65
  -2   6   7   62.81    7.35
  -2   6   8   38.39    6.65
  -2   6   8   45.14    6.48
  -2   7 -12  354.33   16.29
  -2   7 -11   88.21    7.23
  -2   7 -10  178.22   10.76
  -2   7  -9   56.41    5.75
  -2   7  -8  417.31   13.27
  -2   7  -8  388.27   17.76
  -2   7  -7  107.95    9.04
  -2   7  -7  113.00    8.43
  -2   7  -7  117.33    6.76
  -2   7  -6  887.91   30.57
  -2   7  -6  887.04   31.86
  -2   7  -6  899.09   28.07
  -2   7  -5  808.71   28.44
  -2   7  -5  817.72   27.30
  -2   7  -5  794.68   25.21
  -2   7  -5  787.04   29.11
  -2   7  -4  255.80   11.84
  -2   7  -4  240.22   13.26
  -2   7  -4  257.28   14.17
  -2   7  -3  886.20   28.70
  -2   7  -3  872.33   30.61
  -2   7  -3  924.24   31.51
  -2   7  -3  860.33   29.34
  -2   7  -2  763.94   26.82
  -2   7  -2  788.42   28.46
  -2   7  -2  813.82   28.77
  -2   7  -2  787.86   27.91
  -2   7  -1  247.41   13.06
  -2   7  -1  246.02   13.72
  -2   7  -1  249.19   13.58
  -2   7  -1  237.47   13.48
  -2   7   0  249.35   13.99
  -2   7   0  222.62   12.79
  -2   7   0  224.36   13.15
  -2   7   0  219.42   12.70
  -2   7   1  237.26   13.62
  -2   7   1  232.79   14.06
  -2   7   1  209.33   13.14
  -2   7   1  237.62   13.25
  -2   7   2   70.85    7.46
  -2   7   2   70.83    7.34
  -2   7   2   68.36    7.26
  -2   7   2   66.68    6.49
  -2   7   2   66.13    7.45
  -2   7   3  530.01   24.05
  -2   7   3  564.57   24.05
  -2   7   3  500.78   21.42
  -2   7   4  101.60    9.19
  -2   7   4  104.08    9.75
  -2   7   4   80.48    7.49
  -2   7   5   52.98    6.15
  -2   7   5   57.91    7.55
  -2   7   5   61.27    7.33
  -2   7   6    1.19    1.35
  -2   7   6    1.90    1.97
  -2   8 -11  150.51   10.56
  -2   8 -10   90.88    8.04
  -2   8  -9    3.45    1.68
  -2   8  -8  250.67    9.41
  -2   8  -8  232.17   13.93
  -2   8  -8  254.62    8.90
  -2   8  -7  147.59    8.20
  -2   8  -7  145.79    7.28
  -2   8  -7  137.83   10.31
  -2   8  -6  531.11   20.08
  -2   8  -6  510.57   22.32
  -2   8  -5   15.15    3.19
  -2   8  -5   13.14    3.18
  -2   8  -5   15.54    2.65
  -2   8  -4  201.78   11.14
  -2   8  -4  225.91   13.48
  -2   8  -3  273.95   13.78
  -2   8  -3  281.07   15.56
  -2   8  -2  263.64   13.82
  -2   8  -2  239.95   14.04
  -2   8  -2  248.82   14.56
  -2   8  -2  230.59   14.16
  -2   8  -1  430.54   20.80
  -2   8  -1  438.74   19.89
  -2   8  -1  465.61   21.46
  -2   8  -1  466.00   21.10
  -2   8  -1  472.45   20.38
  -2   8   0   57.72    6.49
  -2   8   0   59.02    7.05
  -2   8   0   53.69    6.31
  -2   8   0   61.13    6.91
  -2   8   1   25.81    4.72
  -2   8   1   25.46    4.61
  -2   8   2   27.23    4.94
  -2   8   2   26.53    4.98
  -2   8   3  358.91   19.98
  -2   8   3  385.44   20.75
  -2   8   4   28.65    5.22
  -2   8   4   17.22    4.05
  -2   9  -9   40.69    5.90
  -2   9  -8    1.60    1.50
  -2   9  -7    2.57    1.04
  -2   9  -7    1.24    1.75
  -2   9  -6   96.73    7.87
  -2   9  -6  102.26    7.05
  -2   9  -6  109.21    9.89
  -2   9  -6   97.15    6.86
  -2   9  -5  189.45   13.12
  -2   9  -5  169.44   10.08
  -2   9  -5  180.34   11.85
  -2   9  -5  170.40   10.19
  -2   9  -4  120.48    8.73
  -2   9  -4   99.59    7.96
  -2   9  -4  118.83   10.26
  -2   9  -3   23.73    4.02
  -2   9  -3   25.58    4.17
  -2   9  -3   24.18    4.63
  -2   9  -2  371.01   18.18
  -2   9  -2  372.76   19.93
  -2   9  -2  349.41   17.66
  -2   9  -1  276.33   15.80
  -2   9  -1  273.80   16.99
  -2   9   0   20.07    4.42
  -2   9   0   24.97    4.62
  -2   9   1  348.55   19.11
  -2   9   1  293.18   18.38
  -2   9   2  296.60   18.25
  -1 -10   3  140.78   12.14
  -1 -10   3  136.32   10.89
  -1 -10   4  269.38   16.98
  -1 -10   4  286.44   16.62
  -1 -10   5    5.15    2.50
  -1 -10   5   -1.07    1.36
  -1 -10   6  109.18   10.17
  -1 -10   6   97.97    9.41
  -1  -9  -2   48.30    7.25
  -1  -9  -2   37.57    4.64
  -1  -9  -1  210.61   15.04
  -1  -9  -1  190.43   11.25
  -1  -9   0  178.04   13.69
  -1  -9   0  173.03   10.89
  -1  -9   1  403.38   21.22
  -1  -9   1  468.30   22.83
  -1  -9   1  429.89   19.15
  -1  -9   2  546.76   26.17
  -1  -9   2  577.25   25.89
  -1  -9   2  617.92   24.18
  -1  -9   3   71.64    7.14
  -1  -9   3   69.35    7.66
  -1  -9   4  202.02   13.48
  -1  -9   4  222.25   13.73
  -1  -9   5  355.34   18.27
  -1  -9   5  363.73   18.68
  -1  -9   6  104.17    8.89
  -1  -9   6   89.99    8.88
  -1  -9   7  273.08   15.16
  -1  -9   7  274.45   16.51
  -1  -9   8  282.61   17.18
  -1  -9   8  281.82   15.18
  -1  -9   9   27.99    4.26
  -1  -9   9   28.93    5.12
  -1  -9  10    1.96    1.66
  -1  -9  10    1.50    1.28
  -1  -8  -4  130.98   11.71
  -1  -8  -4  117.16    7.61
  -1  -8  -3   82.40    7.16
  -1  -8  -3   86.09    9.39
  -1  -8  -3  102.53    7.19
  -1  -8  -2  296.62   15.24
  -1  -8  -2  294.83   13.54
  -1  -8  -1  333.38   17.01
  -1  -8  -1  369.57   19.48
  -1  -8  -1  356.18   15.54
  -1  -8   0   59.54    6.88
  -1  -8   0   52.92    6.29
  -1  -8   0   51.85    5.26
  -1  -8   1  666.81   26.85
  -1  -8   1  626.94   26.39
  -1  -8   1  633.58   23.66
  -1  -8   2   55.64    7.38
  -1  -8   2   65.31    7.44
  -1  -8   2   62.08    6.61
  -1  -8   2   60.68    6.74
  -1  -8   2   59.13    6.02
  -1  -8   3   48.40    6.97
  -1  -8   3   34.78    5.03
  -1  -8   3   37.54    5.66
  -1  -8   3   32.68    4.83
  -1  -8   3   42.08    5.23
  -1  -8   4   44.99    6.66
  -1  -8   4   38.68    5.23
  -1  -8   4   42.91    6.30
  -1  -8   4   35.44    5.11
  -1  -8   4   52.55    5.89
  -1  -8   5  197.81   12.22
  -1  -8   5  220.71   13.30
  -1  -8   5  212.98   14.79
  -1  -8   5  226.23   13.40
  -1  -8   6   19.84    4.43
  -1  -8   6   11.71    3.07
  -1  -8   6   13.21    2.93
  -1  -8   6   23.09    4.93
  -1  -8   7  306.82   16.76
  -1  -8   7  304.69   15.22
  -1  -8   8  593.53   25.76
  -1  -8   8  585.96   22.75
  -1  -8   9  114.88   10.18
  -1  -8   9  113.36    8.35
  -1  -8  10  358.45   15.98
  -1  -8  10  362.17   19.86
  -1  -8  11   11.89    2.54
  -1  -8  11   20.49    4.67
  -1  -7  -6   20.13    4.65
  -1  -7  -5   51.80    6.93
  -1  -7  -5   40.64    5.80
  -1  -7  -5   47.66    4.18
  -1  -7  -4   62.02    7.54
  -1  -7  -4   59.51    5.16
  -1  -7  -4   60.95    7.20
  -1  -7  -4   63.76    5.06
  -1  -7  -3   38.28    4.33
  -1  -7  -3   42.44    5.98
  -1  -7  -3   36.35    3.78
  -1  -7  -2   72.33    7.75
  -1  -7  -2   79.82    7.34
  -1  -7  -2   67.77    7.50
  -1  -7  -2   74.70    5.64
  -1  -7  -2   70.79    6.30
  -1  -7  -1   54.02    6.26
  -1  -7  -1   48.92    6.28
  -1  -7  -1   49.60    5.37
  -1  -7  -1   54.27    5.90
  -1  -7  -1   48.49    4.64
  -1  -7   0  249.64   14.24
  -1  -7   0  243.83   13.49
  -1  -7   0  249.66   13.60
  -1  -7   0  272.80   15.74
  -1  -7   0  269.61   12.45
  -1  -7   1 2251.15   63.82
  -1  -7   1 2198.80   63.78
  -1  -7   1 2265.09   63.04
  -1  -7   1 2209.64   66.14
  -1  -7   1 2251.23   60.77
  -1  -7   2   45.01    5.42
  -1  -7   2   41.94    5.48
  -1  -7   2   45.21    5.12
  -1  -7   2   45.49    5.94
  -1  -7   2   46.85    4.90
  -1  -7   3   52.75    5.72
  -1  -7   3   55.67    6.48
  -1  -7   3   56.09    5.88
  -1  -7   3   63.73    7.30
  -1  -7   3   58.91    5.80
  -1  -7   4   61.52    6.94
  -1  -7   4   60.07    6.15
  -1  -7   4   64.56    6.20
  -1  -7   4   54.47    5.73
  -1  -7   4   65.23    7.14
  -1  -7   5   32.68    4.54
  -1  -7   5   37.87    4.56
  -1  -7   5   35.96    5.38
  -1  -7   5   37.47    4.88
  -1  -7   6  336.24   15.30
  -1  -7   6  308.80   15.62
  -1  -7   6  345.82   18.06
  -1  -7   6  321.92   16.18
  -1  -7   6  333.21   18.39
  -1  -7   7  156.30   12.46
  -1  -7   7  172.88   10.15
  -1  -7   7  162.00   10.84
  -1  -7   7  185.11   12.64
  -1  -7   7  160.70   11.14
  -1  -7   8  503.84   22.90
  -1  -7   8  497.98   24.37
  -1  -7   8  473.12   18.89
  -1  -7   8  458.37   21.33
  -1  -7   8  508.75   21.34
  -1  -7   9   34.70    4.14
  -1  -7   9   29.56    4.93
  -1  -7   9   34.03    4.87
  -1  -7   9   30.44    5.08
  -1  -7  10  726.56   24.34
  -1  -7  10  650.99   27.65
  -1  -7  10  661.78   26.88
  -1  -7  10  730.75   29.12
  -1  -7  11   56.95    7.15
  -1  -7  11   59.72    5.17
  -1  -7  11   58.55    6.69
  -1  -7  12   56.92    6.87
  -1  -7  12   70.71    8.21
  -1  -6  -8   94.68    9.87
  -1  -6  -7  203.29   11.98
  -1  -6  -7  210.90   14.59
  -1  -6  -6   10.47    2.84
  -1  -6  -6    9.18    2.96
  -1  -6  -5   16.03    3.60
  -1  -6  -5   11.76    1.75
  -1  -6  -5   15.71    3.18
  -1  -6  -5   15.39    2.18
  -1  -6  -4   85.46    8.07
  -1  -6  -4   89.24    7.87
  -1  -6  -4   77.16    5.45
  -1  -6  -4   90.91    5.52
  -1  -6  -3   19.66    3.81
  -1  -6  -3   17.72    2.46
  -1  -6  -3   22.11    2.99
  -1  -6  -3   18.55    3.62
  -1  -6  -2  491.05   20.61
  -1  -6  -2  504.71   19.16
  -1  -6  -2  469.14   16.02
  -1  -6  -2  483.35   17.71
  -1  -6  -1   95.94    7.98
  -1  -6  -1  109.96    7.77
  -1  -6  -1  103.60    8.53
  -1  -6  -1  100.97    6.33
  -1  -6   0   47.27    5.54
  -1  -6   0   38.54    4.75
  -1  -6   0   31.04    4.04
  -1  -6   0   31.54    3.47
  -1  -6   0   40.77    4.66
  -1  -6   1 1413.62   43.67
  -1  -6   1 1467.70   42.90
  -1  -6   1 1466.30   41.50
  -1  -6   1 1386.14   43.19
  -1  -6   2 2905.37   78.02
  -1  -6   2 2840.02   76.50
  -1  -6   2 2753.12   78.56
  -1  -6   2 3017.44   76.58
  -1  -6   2 2890.96   75.09
  -1  -6   3  310.10   15.70
  -1  -6   3  322.15   14.52
  -1  -6   3  297.78   15.65
  -1  -6   3  308.64   13.98
  -1  -6   3  332.78   14.67
  -1  -6   4  167.93    9.99
  -1  -6   4  165.58    9.76
  -1  -6   4  202.43   12.33
  -1  -6   4  183.41   11.54
  -1  -6   4  186.40   10.46
  -1  -6   5  310.22   13.74
  -1  -6   5  311.23   15.81
  -1  -6   5  292.99   14.26
  -1  -6   5  313.37   14.48
  -1  -6   6  181.87   12.29
  -1  -6   6  178.19   10.50
  -1  -6   6  200.90   12.09
  -1  -6   6  181.56   10.95
  -1  -6   6  167.81    9.53
  -1  -6   7 1127.78   34.54
  -1  -6   7 1242.24   39.00
  -1  -6   7 1122.15   40.11
  -1  -6   7 1151.69   36.66
  -1  -6   7 1198.35   37.86
  -1  -6   8  289.98   14.53
  -1  -6   8  283.17   15.19
  -1  -6   8  289.59   15.15
  -1  -6   8  293.66   12.92
  -1  -6   8  334.35   17.94
  -1  -6   9  259.34   16.04
  -1  -6   9  245.92   13.82
  -1  -6   9  239.79   13.18
  -1  -6   9  239.91   13.99
  -1  -6  10  386.46   20.91
  -1  -6  10  382.28   17.87
  -1  -6  10  375.17   17.79
  -1  -6  10  404.19   15.36
  -1  -6  10  392.61   19.19
  -1  -6  11  132.13    9.49
  -1  -6  11  139.85   10.15
  -1  -6  11  131.84   10.58
  -1  -6  11  141.78    7.91
  -1  -6  12  186.41   11.35
  -1  -6  12  191.68   12.29
  -1  -6  12  195.32   13.38
  -1  -6  13   45.46    6.47
  -1  -5  -9  222.66   14.94
  -1  -5  -8  262.55   12.08
  -1  -5  -8  264.80   15.87
  -1  -5  -7  271.07   12.89
  -1  -5  -7  273.28   15.76
  -1  -5  -6 1279.02   42.42
  -1  -5  -6 1307.93   39.22
  -1  -5  -5    4.73    1.18
  -1  -5  -5    2.51    1.36
  -1  -5  -5    4.39    0.95
  -1  -5  -5    3.77    1.43
  -1  -5  -4  418.98   17.82
  -1  -5  -4  411.79   14.14
  -1  -5  -4  435.87   14.02
  -1  -5  -3  138.44    9.51
  -1  -5  -3  156.91    7.84
  -1  -5  -3  164.82   10.09
  -1  -5  -2  306.99   14.93
  -1  -5  -2  381.10   16.32
  -1  -5  -2  346.51   14.47
  -1  -5  -2  336.74   13.28
  -1  -5  -2  345.92   12.33
  -1  -5  -1  996.46   31.07
  -1  -5  -1 1142.35   33.92
  -1  -5  -1 1140.63   32.64
  -1  -5  -1 1059.54   33.93
  -1  -5  -1 1005.00   29.57
  -1  -5   0  639.85   22.36
  -1  -5   0  674.47   22.59
  -1  -5   0  683.82   21.18
  -1  -5   0  627.78   22.92
  -1  -5   1  135.41    8.45
  -1  -5   1  128.15    7.80
  -1  -5   1  140.10    9.17
  -1  -5   1  144.95    7.65
  -1  -5   1  148.11    8.66
  -1  -5   2   80.57    6.52
  -1  -5   2   81.19    5.96
  -1  -5   2   86.25    6.97
  -1  -5   2   75.21    5.47
  -1  -5   2   72.72    5.78
  -1  -5   3  387.50   16.67
  -1  -5   3  367.72   15.11
  -1  -5   3  384.85   16.72
  -1  -5   3  363.20   14.85
  -1  -5   3  414.05   15.60
  -1  -5   4    2.79    1.34
  -1  -5   4    2.84    1.05
  -1  -5   4    2.68    1.07
  -1  -5   4    4.66    1.51
  -1  -5   4    2.04    0.98
  -1  -5   5   83.78    7.33
  -1  -5   5   89.59    6.51
  -1  -5   5   89.61    7.13
  -1  -5   5   79.42    6.27
  -1  -5   6   11.21    2.37
  -1  -5   6   17.53    3.10
  -1  -5   6   11.56    2.90
  -1  -5   6   11.35    2.25
  -1  -5   7 1562.43   49.46
  -1  -5   7 1569.34   46.94
  -1  -5   7 1562.90   46.77
  -1  -5   8   22.37    3.71
  -1  -5   8   24.40    4.26
  -1  -5   8   25.46    3.66
  -1  -5   8   30.97    4.16
  -1  -5   9   67.87    4.99
  -1  -5   9   69.28    7.42
  -1  -5   9   79.08    6.54
  -1  -5   9   77.00    6.93
  -1  -5  10   83.09    5.64
  -1  -5  10   99.83    9.25
  -1  -5  10   89.67    6.96
  -1  -5  10   79.74    7.05
  -1  -5  10   89.70    7.88
  -1  -5  11  124.09    9.07
  -1  -5  11  114.08   10.32
  -1  -5  11  121.24    8.16
  -1  -5  11  131.78    7.34
  -1  -5  11  143.24   10.40
  -1  -5  12  206.44   10.66
  -1  -5  12  215.94   12.84
  -1  -5  12  234.29   13.95
  -1  -5  12  212.06    9.82
  -1  -5  13  115.08    9.94
  -1  -5  13  104.18    8.70
  -1  -5  14   26.22    4.92
  -1  -4 -10  690.37   28.48
  -1  -4  -9   98.04    8.71
  -1  -4  -9   85.84    4.77
  -1  -4  -8  154.82    7.72
  -1  -4  -8  164.81   11.36
  -1  -4  -7  568.83   19.05
  -1  -4  -7  529.88   22.48
  -1  -4  -6  371.35   14.63
  -1  -4  -6  351.26   16.64
  -1  -4  -5   92.89    6.47
  -1  -4  -5   94.80    3.75
  -1  -4  -5   84.61    7.07
  -1  -4  -4  831.67   29.00
  -1  -4  -4  897.06   28.07
  -1  -4  -4  905.69   24.05
  -1  -4  -3  630.87   18.52
  -1  -4  -3  609.24   22.10
  -1  -4  -3  648.80   21.89
  -1  -4  -3  636.46   20.84
  -1  -4  -3  617.39   17.85
  -1  -4  -2   40.19    4.25
  -1  -4  -2   49.59    4.66
  -1  -4  -2   40.78    3.85
  -1  -4  -2   37.92    2.87
  -1  -4  -1  743.78   23.39
  -1  -4  -1  739.94   21.74
  -1  -4  -1  684.39   21.91
  -1  -4  -1  698.00   23.44
  -1  -4  -1  654.21   19.94
  -1  -4   0  802.52   24.19
  -1  -4   0  842.80   26.24
  -1  -4   0  787.73   22.81
  -1  -4   0  781.55   24.18
  -1  -4   0  755.64   24.73
  -1  -4   1  625.85   19.61
  -1  -4   1  589.20   18.53
  -1  -4   1  612.09   19.95
  -1  -4   1  627.67   20.24
  -1  -4   2 2039.19   56.06
  -1  -4   2 2176.40   55.07
  -1  -4   2 2189.40   57.01
  -1  -4   2 2016.72   54.14
  -1  -4   2 2111.64   54.99
  -1  -4   3 2867.41   71.18
  -1  -4   3 2708.68   72.50
  -1  -4   3 2651.44   70.52
  -1  -4   4 2396.39   62.65
  -1  -4   4 2481.29   64.20
  -1  -4   4 2389.88   62.69
  -1  -4   5  667.27   22.42
  -1  -4   5  656.77   22.16
  -1  -4   5  694.15   23.19
  -1  -4   6   14.02    2.83
  -1  -4   6    6.57    1.54
  -1  -4   6   12.18    2.28
  -1  -4   6   12.39    2.34
  -1  -4   7    4.61    1.56
  -1  -4   7   10.03    2.48
  -1  -4   7    8.69    1.97
  -1  -4   7    6.39    1.68
  -1  -4   8 1054.98   29.83
  -1  -4   8 1045.92   35.26
  -1  -4   8 1025.45   31.46
  -1  -4   8 1108.36   32.76
  -1  -4   8  994.71   32.67
  -1  -4   9  239.27   13.87
  -1  -4   9  238.89   11.14
  -1  -4   9  263.26   10.57
  -1  -4   9  235.00   11.97
  -1  -4   9  231.22   12.50
  -1  -4  10   32.67    4.54
  -1  -4  10   35.79    3.71
  -1  -4  10   24.29    4.30
  -1  -4  10   36.03    3.49
  -1  -4  10   31.84    4.23
  -1  -4  11  212.92    6.37
  -1  -4  11  222.01   13.75
  -1  -4  11  231.50   12.40
  -1  -4  11  248.04   13.44
  -1  -4  11  214.26    9.73
  -1  -4  11  221.59   10.05
  -1  -4  12  245.37   10.76
  -1  -4  12  237.72    7.66
  -1  -4  12  221.12   14.33
  -1  -4  12  241.53   13.23
  -1  -4  12  238.82   13.84
  -1  -4  12  223.70    9.16
  -1  -4  13    4.71    2.11
  -1  -4  13    1.73    1.50
  -1  -4  14   25.72    4.50
  -1  -3 -11   41.46    5.63
  -1  -3 -10  117.32    9.29
  -1  -3  -9   -0.19    0.71
  -1  -3  -8   41.52    5.00
  -1  -3  -8   36.77    2.81
  -1  -3  -7  441.39   14.63
  -1  -3  -7  460.91   18.76
  -1  -3  -6   52.11    4.01
  -1  -3  -6   55.83    5.36
  -1  -3  -5   52.27    4.96
  -1  -3  -5   49.20    3.96
  -1  -3  -4   26.37    3.29
  -1  -3  -4   23.23    2.72
  -1  -3  -4   20.86    1.68
  -1  -3  -3   25.70    3.17
  -1  -3  -3   32.34    3.26
  -1  -3  -3   31.49    3.02
  -1  -3  -3   31.67    2.11
  -1  -3  -2  118.13    5.20
  -1  -3  -2  110.44    6.56
  -1  -3  -2  128.80    7.08
  -1  -3  -2  118.21    6.64
  -1  -3  -2  116.88    6.05
  -1  -3  -2  114.30    4.77
  -1  -3  -1 1502.02   39.34
  -1  -3  -1 1566.00   41.64
  -1  -3  -1 1492.59   38.35
  -1  -3  -1 1550.31   40.17
  -1  -3  -1 1448.62   41.09
  -1  -3   0  102.64    5.55
  -1  -3   0  103.88    5.95
  -1  -3   0  113.08    5.74
  -1  -3   0  112.76    6.43
  -1  -3   0  102.57    5.01
  -1  -3   1   29.70    2.99
  -1  -3   1   32.15    2.54
  -1  -3   1   37.87    3.11
  -1  -3   1   36.82    3.48
  -1  -3   1   33.42    2.71
  -1  -3   1   29.61    2.86
  -1  -3   2 2646.43   69.10
  -1  -3   2 2651.46   67.95
  -1  -3   2 2812.06   65.86
  -1  -3   2 2756.81   69.38
  -1  -3   2 2737.26   67.62
  -1  -3   3 4781.22  109.33
  -1  -3   3 4209.03  106.84
  -1  -3   3 4336.60  107.93
  -1  -3   3 4815.21  107.43
  -1  -3   4 1863.12   51.74
  -1  -3   4 1998.84   50.25
  -1  -3   4 1938.85   50.56
  -1  -3   4 1883.40   50.05
  -1  -3   5  769.33   25.96
  -1  -3   5  797.68   24.41
  -1  -3   5  798.46   24.70
  -1  -3   6 1229.71   31.30
  -1  -3   6 1079.91   32.53
  -1  -3   6 1154.73   32.24
  -1  -3   6 1155.05   34.99
  -1  -3   6 1071.38   32.81
  -1  -3   7  492.31   13.03
  -1  -3   7  496.42   16.01
  -1  -3   7  501.62   12.80
  -1  -3   7  464.17   19.13
  -1  -3   7  496.46   12.80
  -1  -3   7  507.00   16.66
  -1  -3   7  465.34   17.51
  -1  -3   7  530.46   18.51
  -1  -3   8  977.96   28.07
  -1  -3   8  997.37   28.47
  -1  -3   8  988.73   25.51
  -1  -3   8 1015.50   30.69
  -1  -3   8  924.82   30.52
  -1  -3   8  999.53   25.40
  -1  -3   9  682.61   23.23
  -1  -3   9  685.64   20.13
  -1  -3   9  686.58   25.11
  -1  -3   9  653.21   20.60
  -1  -3   9  662.66   18.81
  -1  -3   9  639.38   18.56
  -1  -3   9  642.33   23.24
  -1  -3  10  246.89    9.35
  -1  -3  10  261.61   10.88
  -1  -3  10  240.77    9.58
  -1  -3  10  234.78   12.18
  -1  -3  10  239.25   12.60
  -1  -3  10  256.27   13.80
  -1  -3  10  251.97    9.27
  -1  -3  11 1165.59   32.85
  -1  -3  11 1190.01   34.40
  -1  -3  11 1152.55   38.92
  -1  -3  11 1187.39   33.31
  -1  -3  11 1252.81   38.49
  -1  -3  11 1214.09   30.24
  -1  -3  11 1231.66   37.74
  -1  -3  12  929.26   33.85
  -1  -3  12  952.68   28.40
  -1  -3  12  999.52   29.30
  -1  -3  12 1001.54   29.82
  -1  -3  12  955.17   32.56
  -1  -3  12  997.70   33.40
  -1  -3  13   29.19    4.73
  -1  -3  13   32.86    4.77
  -1  -3  13   29.97    3.46
  -1  -3  13   32.99    4.74
  -1  -3  14   21.70    4.01
  -1  -2 -12  136.03   10.10
  -1  -2 -11    8.07    2.33
  -1  -2 -10  234.90   12.74
  -1  -2  -9  473.65   19.10
  -1  -2  -8    2.20    1.14
  -1  -2  -7  207.04    7.03
  -1  -2  -7  200.27   10.38
  -1  -2  -6 1844.38   50.53
  -1  -2  -6 1872.10   46.37
  -1  -2  -5  204.28    7.83
  -1  -2  -5  210.05    9.78
  -1  -2  -4 6889.67  164.74
  -1  -2  -4 6775.59  163.49
  -1  -2  -3   80.48    4.97
  -1  -2  -3   79.33    2.92
  -1  -2  -3   81.23    4.53
  -1  -2  -2 1833.04   46.02
  -1  -2  -2 2017.40   50.06
  -1  -2  -2 1971.35   49.40
  -1  -2  -2 1966.50   48.09
  -1  -2  -2 1804.77   48.58
  -1  -2  -1  873.12   22.22
  -1  -2  -1  827.90   21.15
  -1  -2  -1  780.58   22.80
  -1  -2  -1  788.14   22.90
  -1  -2  -1  797.88   22.86
  -1  -2  -1  798.66   20.56
  -1  -2   0 1291.95   32.32
  -1  -2   0 1280.09   33.17
  -1  -2   0 1392.12   34.27
  -1  -2   0 1293.44   34.31
  -1  -2   0 1262.17   33.37
  -1  -2   1  111.57    4.61
  -1  -2   1  115.72    5.41
  -1  -2   1  111.79    5.09
  -1  -2   1  125.55    5.88
  -1  -2   1  112.95    4.83
  -1  -2   2  910.58   22.44
  -1  -2   2  955.18   25.53
  -1  -2   2  876.60   24.30
  -1  -2   2  851.10   23.97
  -1  -2   2  888.81   24.85
  -1  -2   3  676.87   16.53
  -1  -2   3  660.64   20.43
  -1  -2   3  639.43   19.30
  -1  -2   3  630.43   19.30
  -1  -2   4  180.96    5.41
  -1  -2   4  183.64    8.59
  -1  -2   4  180.69    7.41
  -1  -2   4  169.41    7.53
  -1  -2   4  168.73    7.57
  -1  -2   5  378.37   10.50
  -1  -2   5  394.71   12.50
  -1  -2   5  375.39   14.52
  -1  -2   5  382.80   12.53
  -1  -2   5  378.47   13.35
  -1  -2   5  398.27   10.61
  -1  -2   5  363.95   13.32
  -1  -2   6   89.80    4.05
  -1  -2   6   95.93    4.86
  -1  -2   6   90.81    5.61
  -1  -2   6   91.36    4.12
  -1  -2   6  100.14    6.59
  -1  -2   6   93.08    5.75
  -1  -2   6   91.17    4.99
  -1  -2   7   41.30    2.93
  -1  -2   7   42.99    4.45
  -1  -2   7   45.01    4.03
  -1  -2   7   42.77    3.01
  -1  -2   7   45.36    3.59
  -1  -2   7   44.25    4.04
  -1  -2   7   45.24    3.08
  -1  -2   8  279.11   10.50
  -1  -2   8  294.20   13.30
  -1  -2   8  278.89   12.11
  -1  -2   8  263.90   10.18
  -1  -2   8  278.02   12.28
  -1  -2   8  289.12    9.30
  -1  -2   8  303.65   11.45
  -1  -2   9 1285.02   35.64
  -1  -2   9 1330.90   38.91
  -1  -2   9 1208.26   36.87
  -1  -2   9 1297.29   35.32
  -1  -2   9 1251.25   37.38
  -1  -2   9 1282.01   31.36
  -1  -2   9 1226.12   34.71
  -1  -2  10  167.64   10.20
  -1  -2  10  167.12    9.54
  -1  -2  10  171.77    8.69
  -1  -2  10  159.59    8.43
  -1  -2  10  149.74    9.28
  -1  -2  10  158.43    8.28
  -1  -2  11  184.60   11.02
  -1  -2  11  177.17    9.33
  -1  -2  11  188.81    9.91
  -1  -2  11  170.52   10.15
  -1  -2  11  172.60   10.34
  -1  -2  11  164.18    8.98
  -1  -2  12  409.13   16.36
  -1  -2  12  406.84   16.91
  -1  -2  12  406.15   17.79
  -1  -2  12  402.68   17.80
  -1  -2  12  426.93   16.81
  -1  -2  13  163.51    9.80
  -1  -2  13  145.47    8.99
  -1  -2  13  151.51    9.85
  -1  -2  13  145.48   10.11
  -1  -2  13  159.04   10.51
  -1  -2  14  189.05   11.24
  -1  -2  14  202.39   12.37
  -1  -1 -12  121.28    8.70
  -1  -1 -11   51.03    5.27
  -1  -1 -10   50.23    5.00
  -1  -1  -9   12.67    2.39
  -1  -1  -8 2729.22   70.38
  -1  -1  -7  190.27    9.16
  -1  -1  -6  614.62   19.40
  -1  -1  -6  586.73   20.65
  -1  -1  -5  351.20   12.47
  -1  -1  -5  354.69   13.74
  -1  -1  -5  353.37   10.06
  -1  -1  -4 4563.83  118.71
  -1  -1  -4 5014.92  120.80
  -1  -1  -3 2147.87   51.02
  -1  -1  -3 2059.89   52.25
  -1  -1  -3 1966.67   49.52
  -1  -1  -2 2168.52   51.99
  -1  -1  -2 2109.86   53.48
  -1  -1  -2 2116.55   52.49
  -1  -1  -1  765.63   18.13
  -1  -1  -1  727.31   19.72
  -1  -1  -1  727.85   18.90
  -1  -1  -1  752.53   19.85
  -1  -1  -1  705.82   20.26
  -1  -1   0  824.52   19.93
  -1  -1   0  739.02   20.38
  -1  -1   0  733.37   20.53
  -1  -1   0  806.24   19.98
  -1  -1   1 1190.62   27.94
  -1  -1   1 1032.90   27.57
  -1  -1   1 1128.55   27.06
  -1  -1   1 1006.72   27.27
  -1  -1   2 1780.46   44.45
  -1  -1   2 1951.63   45.47
  -1  -1   2 1744.03   45.97
  -1  -1   2 1901.91   43.91
  -1  -1   2 1724.50   45.29
  -1  -1   3 1272.93   31.03
  -1  -1   3 1253.89   32.17
  -1  -1   3 1283.92   33.39
  -1  -1   3 1263.76   31.84
  -1  -1   3 1286.94   32.73
  -1  -1   4 1662.65   40.81
  -1  -1   4 1601.48   42.99
  -1  -1   4 1601.27   42.24
  -1  -1   4 1678.27   41.80
  -1  -1   4 1710.59   40.80
  -1  -1   5 5439.71  131.22
  -1  -1   5 5683.38  132.93
  -1  -1   5 5476.17  131.97
  -1  -1   6  139.76    6.68
  -1  -1   6  141.62    7.40
  -1  -1   6  139.08    7.00
  -1  -1   6  137.81    6.30
  -1  -1   6  139.36    4.81
  -1  -1   6  134.15    6.29
  -1  -1   7   33.64    3.07
  -1  -1   7   29.59    3.01
  -1  -1   7   34.17    3.49
  -1  -1   7   27.02    3.04
  -1  -1   7   23.70    2.64
  -1  -1   8    1.94    0.73
  -1  -1   8    1.39    0.98
  -1  -1   8    1.13    0.69
  -1  -1   8    0.47    0.50
  -1  -1   8    1.81    1.18
  -1  -1   9    2.42    1.15
  -1  -1   9    4.62    1.34
  -1  -1   9    3.57    1.32
  -1  -1   9    4.36    1.40
  -1  -1  10  167.93    9.19
  -1  -1  10  162.92    9.46
  -1  -1  10  166.25    9.55
  -1  -1  10  172.89    9.54
  -1  -1  10  185.76    9.96
  -1  -1  11   77.68    6.29
  -1  -1  11   89.36    7.01
  -1  -1  11   85.16    7.02
  -1  -1  11   94.63    7.00
  -1  -1  11   92.41    7.15
  -1  -1  12   31.48    4.25
  -1  -1  12   38.64    4.48
  -1  -1  12   32.15    4.28
  -1  -1  12   34.27    4.55
  -1  -1  12   40.82    4.90
  -1  -1  13    2.14    1.13
  -1  -1  13    1.22    1.20
  -1  -1  13    1.78    1.66
  -1  -1  13    2.23    1.86
  -1  -1  13    1.31    1.34
  -1   0 -13  530.33   20.08
  -1   0 -12  203.24   10.56
  -1   0 -11   79.81    6.01
  -1   0 -10   78.29    5.74
  -1   0  -9   27.60    3.08
  -1   0  -8  418.28   14.56
  -1   0  -7   10.73    1.67
  -1   0  -7   10.31    1.97
  -1   0  -6 1392.54   37.87
  -1   0  -6 1335.14   35.33
  -1   0  -5  205.00    9.00
  -1   0  -5  208.44    7.62
  -1   0  -4  215.37    7.21
  -1   0  -4  200.94    8.51
  -1   0  -3  461.70   12.61
  -1   0  -3  461.17   14.32
  -1   0  -2  780.10   20.95
  -1   0  -2  804.26   18.72
  -1   0  -2  765.62   19.32
  -1   0  -1  790.72   19.76
  -1   0  -1  753.92   18.85
  -1   0   0 1310.96   32.49
  -1   0   2    3.89    0.73
  -1   0   2    3.16    0.64
  -1   0   3 4110.28   98.05
  -1   0   4  511.07   15.39
  -1   0   4  486.51   15.17
  -1   0   5  762.28   22.05
  -1   0   5  740.97   22.07
  -1   0   6 1754.86   47.59
  -1   0   6 1892.04   48.08
  -1   0   6 1824.99   48.17
  -1   0   7 1764.32   48.96
  -1   0   7 1915.64   49.85
  -1   0   7 1883.20   50.00
  -1   0   8  545.72   18.76
  -1   0   8  511.81   18.90
  -1   0   8  501.69   18.84
  -1   0   9  353.22   14.66
  -1   0   9  328.43   14.89
  -1   0   9  357.61   15.46
  -1   0  10  380.06   16.05
  -1   0  10  375.63   16.80
  -1   0  10  368.46   16.63
  -1   0  10  364.32   15.73
  -1   0  10  361.57   14.44
  -1   0  11  164.57   10.09
  -1   0  11  172.21   10.43
  -1   0  11  165.87   10.98
  -1   0  11  177.27   11.16
  -1   0  11  174.23    9.29
  -1   0  12  590.35   23.08
  -1   0  12  592.61   23.30
  -1   0  12  540.05   24.18
  -1   0  12  638.12   22.62
  -1   0  12  654.45   25.35
  -1   0  12  612.21   21.61
  -1   0  13   77.82    7.37
  -1   0  13   84.44    8.89
  -1   0  13   99.26    7.58
  -1   0  13  106.13    9.25
  -1   1 -12  126.34    7.12
  -1   1 -11   90.72    5.71
  -1   1 -10   32.52    3.09
  -1   1  -9  716.78   21.10
  -1   1  -8  307.39   10.58
  -1   1  -7  365.59   11.40
  -1   1  -7  358.38   13.38
  -1   1  -6   12.08    1.31
  -1   1  -6   11.63    1.84
  -1   1  -5   23.64    1.53
  -1   1  -5   25.58    2.49
  -1   1  -4 4623.66  110.36
  -1   1  -3  392.63   12.13
  -1   1  -3  404.24   10.59
  -1   1  -3  417.59   11.82
  -1   1  -1  383.20   10.58
  -1   1  -1  366.23    8.99
  -1   1  -1  352.23    9.75
  -1   1  -1  369.02    9.18
  -1   1   0    3.08    0.55
  -1   1   0    1.75    0.42
  -1   1   1 1962.35   52.02
  -1   1   1 2051.88   51.97
  -1   1   2   42.25    2.96
  -1   1   2   43.85    2.98
  -1   1   2   43.94    2.64
  -1   1   3  649.43   19.99
  -1   1   3  668.01   18.77
  -1   1   4 1323.52   35.09
  -1   1   4 1300.35   33.48
  -1   1   4 1258.26   35.32
  -1   1   5 1092.17   31.11
  -1   1   5 1086.98   29.29
  -1   1   5 1104.08   31.72
  -1   1   6 2090.74   56.11
  -1   1   6 2121.85   56.59
  -1   1   6 2103.40   56.89
  -1   1   6 2193.98   54.19
  -1   1   7  118.84    7.73
  -1   1   7  116.68    6.22
  -1   1   7  114.14    7.75
  -1   1   7  126.85    7.62
  -1   1   8   86.94    6.65
  -1   1   8   99.37    5.91
  -1   1   8   90.00    7.10
  -1   1   8   90.67    7.23
  -1   1   9  523.40   21.50
  -1   1   9  532.76   21.63
  -1   1   9  566.53   18.60
  -1   1   9  530.53   20.59
  -1   1  10  117.02    8.45
  -1   1  10  118.28    9.22
  -1   1  10  107.76    8.80
  -1   1  10  117.40    7.12
  -1   1  11  245.11   13.45
  -1   1  11  211.08   13.64
  -1   1  11  241.45   11.20
  -1   1  11  260.17   14.89
  -1   1  12  223.19   13.16
  -1   1  12  217.20   13.24
  -1   1  12  229.97   11.20
  -1   1  13  158.39   10.69
  -1   1  13  146.60   11.81
  -1   2  -8  400.26   14.08
  -1   2  -7  181.96    7.86
  -1   2  -6 2572.97   63.52
  -1   2  -5   47.52    2.87
  -1   2  -5   42.77    2.97
  -1   2  -5   48.78    3.52
  -1   2  -4  117.28    5.06
  -1   2  -4  125.12    5.05
  -1   2  -4  116.75    5.63
  -1   2  -3 4212.30   95.36
  -1   2  -3 4023.43   93.94
  -1   2  -1  316.20    9.65
  -1   2  -1  323.27    9.94
  -1   2  -1  303.57    9.86
  -1   2  -1  322.73   10.33
  -1   2   0 3892.91   93.03
  -1   2   1  204.85    7.97
  -1   2   1  210.95    8.14
  -1   2   1  197.39    7.66
  -1   2   1  187.72    7.18
  -1   2   2    2.29    0.88
  -1   2   2    1.55    0.62
  -1   2   3  188.05    7.44
  -1   2   3  196.00    9.04
  -1   2   4   28.22    3.15
  -1   2   4   22.79    2.23
  -1   2   4   26.54    3.20
  -1   2   5  236.19   11.01
  -1   2   5  237.97   11.34
  -1   2   5  258.12    9.49
  -1   2   5  233.96   11.40
  -1   2   6  578.51   21.57
  -1   2   6  620.96   18.82
  -1   2   6  564.47   21.61
  -1   2   7 4743.59  113.35
  -1   2   7 4399.55  113.72
  -1   2   7 4437.86  108.73
  -1   2   7 4342.38  113.86
  -1   2   8  851.76   29.22
  -1   2   8  932.25   31.31
  -1   2   8  868.38   26.02
  -1   2   8  870.77   30.69
  -1   2   9   67.87    6.53
  -1   2   9   72.99    7.43
  -1   2   9   84.60    5.63
  -1   2   9   76.28    7.44
  -1   2  10   32.37    4.69
  -1   2  10   42.89    5.83
  -1   2  10   33.39    5.10
  -1   2  10   37.77    4.61
  -1   2  10   29.67    3.35
  -1   2  11    4.54    2.16
  -1   2  11    9.28    2.72
  -1   2  11    6.61    2.42
  -1   2  12  128.02    9.56
  -1   2  12  124.87   11.24
  -1   3  -8  221.90    8.58
  -1   3  -7  108.57    5.74
  -1   3  -7  106.43    5.07
  -1   3  -6 1109.84   30.44
  -1   3  -6 1139.23   29.32
  -1   3  -6 1141.54   32.28
  -1   3  -5   52.39    3.01
  -1   3  -5   49.16    3.52
  -1   3  -5   43.71    3.81
  -1   3  -4    9.05    1.61
  -1   3  -4   11.67    1.38
  -1   3  -4   11.69    1.60
  -1   3  -3 2614.24   61.87
  -1   3  -3 2500.38   63.09
  -1   3  -3 2527.71   62.64
  -1   3  -3 2652.51   64.33
  -1   3  -2  802.32   21.46
  -1   3  -2  742.96   21.97
  -1   3  -2  825.06   21.76
  -1   3  -2  756.21   22.68
  -1   3  -1  202.84    8.12
  -1   3  -1  210.41    8.66
  -1   3   0  193.42    8.20
  -1   3   0  202.70    8.26
  -1   3   0  187.57    8.10
  -1   3   0  191.78    7.95
  -1   3   1 1360.25   38.47
  -1   3   1 1393.63   38.27
  -1   3   1 1516.81   37.95
  -1   3   1 1488.70   39.11
  -1   3   2   48.24    3.89
  -1   3   2   49.65    3.53
  -1   3   2   50.11    4.29
  -1   3   3 1568.15   42.11
  -1   3   3 1557.84   41.10
  -1   3   3 1540.82   39.49
  -1   3   4  148.24    8.54
  -1   3   4  154.05    8.21
  -1   3   4  156.14    7.17
  -1   3   4  146.68    8.91
  -1   3   5  272.76   12.55
  -1   3   5  239.04   12.18
  -1   3   5  229.81   11.03
  -1   3   5  243.16    9.90
  -1   3   5  261.60   12.89
  -1   3   6  204.59   11.18
  -1   3   6  182.35   11.10
  -1   3   6  192.70    8.65
  -1   3   6  179.68   11.06
  -1   3   6  202.28   10.34
  -1   3   7  742.62   28.13
  -1   3   7  743.18   27.20
  -1   3   7  816.83   26.56
  -1   3   7  779.70   23.67
  -1   3   7  769.30   28.51
  -1   3   8   20.23    3.47
  -1   3   8   28.61    4.70
  -1   3   8   24.68    2.96
  -1   3   8   22.54    3.45
  -1   3   8   28.41    4.69
  -1   3   9  424.43   21.18
  -1   3   9  457.87   19.14
  -1   3   9  453.07   20.45
  -1   3   9  434.69   16.20
  -1   3   9  494.33   22.34
  -1   3  10   35.00    3.74
  -1   3  10   37.98    5.84
  -1   3  10   43.35    5.20
  -1   3  11   92.79    9.77
  -1   3  11   83.50    7.83
  -1   4  -9  550.51   18.73
  -1   4  -8   50.30    4.23
  -1   4  -8   57.12    3.11
  -1   4  -7  427.69   15.03
  -1   4  -7  415.20   12.14
  -1   4  -7  429.62   16.49
  -1   4  -6   88.70    4.02
  -1   4  -6   97.27    5.92
  -1   4  -6   93.06    6.43
  -1   4  -5  614.27   17.10
  -1   4  -5  568.24   18.99
  -1   4  -5  608.80   20.33
  -1   4  -4 1027.98   29.55
  -1   4  -4  939.04   25.85
  -1   4  -4 1030.92   28.64
  -1   4  -4  984.14   26.88
  -1   4  -3  726.90   22.85
  -1   4  -3  787.46   21.43
  -1   4  -3  742.32   23.45
  -1   4  -2 2953.98   71.72
  -1   4  -2 2929.29   70.32
  -1   4  -2 2714.89   71.72
  -1   4  -2 2747.68   70.75
  -1   4  -1  628.93   19.46
  -1   4  -1  623.15   20.08
  -1   4  -1  626.89   20.05
  -1   4  -1  627.13   19.95
  -1   4   0  803.08   25.31
  -1   4   0  891.29   26.13
  -1   4   0  849.77   25.77
  -1   4   0  862.48   25.34
  -1   4   1  234.28   10.67
  -1   4   1  205.68    9.86
  -1   4   1  238.77    9.88
  -1   4   1  208.67   10.25
  -1   4   2   15.23    2.18
  -1   4   2   10.35    2.02
  -1   4   2   15.19    2.37
  -1   4   2   13.77    2.44
  -1   4   3  514.98   19.19
  -1   4   3  479.78   18.03
  -1   4   3  487.51   16.61
  -1   4   3  491.27   19.12
  -1   4   4 1328.91   39.65
  -1   4   4 1276.54   39.57
  -1   4   4 1285.01   38.36
  -1   4   4 1319.20   36.17
  -1   4   4 1300.80   40.15
  -1   4   5  469.97   18.90
  -1   4   5  406.67   18.45
  -1   4   5  408.14   17.17
  -1   4   5  419.90   15.32
  -1   4   5  466.95   19.75
  -1   4   6 1262.87   41.67
  -1   4   6 1268.54   39.33
  -1   4   6 1322.75   41.24
  -1   4   6 1288.79   36.47
  -1   4   6 1348.61   42.50
  -1   4   7  160.69   10.20
  -1   4   7  169.43   11.91
  -1   4   7  148.65    8.12
  -1   4   7  167.83   11.88
  -1   4   7  160.76   11.07
  -1   4   8    8.76    1.84
  -1   4   8   11.55    3.20
  -1   4   8    7.77    2.19
  -1   4   9    4.06    1.44
  -1   4   9    3.66    2.20
  -1   4   9   -0.94    1.30
  -1   4  10   57.99    7.72
  -1   4  10   52.71    6.42
  -1   5 -10  646.21   22.25
  -1   5  -9  790.29   25.59
  -1   5  -8  203.67   10.12
  -1   5  -8  203.84   11.32
  -1   5  -7   64.22    2.79
  -1   5  -7   60.01    5.11
  -1   5  -7   64.97    5.84
  -1   5  -6   52.74    4.75
  -1   5  -6   62.12    5.59
  -1   5  -6   59.62    3.37
  -1   5  -5   25.31    2.45
  -1   5  -5   32.30    3.84
  -1   5  -5   28.72    3.35
  -1   5  -4 1443.17   36.89
  -1   5  -4 1514.25   40.36
  -1   5  -3 1827.94   48.42
  -1   5  -3 1825.05   48.84
  -1   5  -2 1376.73   40.69
  -1   5  -2 1528.13   41.51
  -1   5  -2 1446.60   39.36
  -1   5  -2 1464.30   40.59
  -1   5  -1  115.62    6.88
  -1   5  -1  117.32    7.40
  -1   5  -1  130.64    7.76
  -1   5  -1  113.55    7.27
  -1   5   0  716.34   23.88
  -1   5   0  744.09   24.76
  -1   5   0  739.55   24.42
  -1   5   0  734.39   23.82
  -1   5   1    4.63    1.29
  -1   5   1    5.91    1.79
  -1   5   1    8.11    1.89
  -1   5   1    4.75    1.31
  -1   5   2  933.48   30.75
  -1   5   2  945.61   30.60
  -1   5   2  920.42   29.95
  -1   5   2  926.96   28.53
  -1   5   2  947.32   30.93
  -1   5   3  587.31   22.52
  -1   5   3  643.90   22.43
  -1   5   3  567.62   19.85
  -1   5   3  558.15   22.38
  -1   5   3  557.82   22.21
  -1   5   4 1053.89   34.46
  -1   5   4 1000.08   32.74
  -1   5   4  986.28   30.29
  -1   5   4  991.87   34.28
  -1   5   4 1004.52   34.11
  -1   5   5  223.03   13.51
  -1   5   5  243.75   13.08
  -1   5   5  244.97   11.43
  -1   5   5  245.48   14.37
  -1   5   5  272.80   15.08
  -1   5   6  203.36   13.45
  -1   5   6  200.15   11.99
  -1   5   6  192.05    9.91
  -1   5   6  185.96   13.04
  -1   5   6  185.16   12.44
  -1   5   7  528.56   22.42
  -1   5   7  524.38   19.42
  -1   5   7  579.37   25.59
  -1   5   8   76.51    7.65
  -1   5   8   82.09    6.21
  -1   5   8   81.27    9.03
  -1   5   9  223.62   16.05
  -1   5   9  205.98   13.52
  -1   6 -11  700.77   24.99
  -1   6 -10  352.93   15.56
  -1   6  -9  799.77   27.08
  -1   6  -8 1528.71   44.97
  -1   6  -8 1572.25   47.04
  -1   6  -7    3.94    1.66
  -1   6  -7    2.30    0.49
  -1   6  -7    3.43    1.43
  -1   6  -7    3.96    0.58
  -1   6  -6  126.53    8.39
  -1   6  -6  114.13    8.41
  -1   6  -6  128.42    6.00
  -1   6  -5   15.79    2.98
  -1   6  -5   24.90    2.54
  -1   6  -5   21.42    2.61
  -1   6  -4 1410.37   38.12
  -1   6  -4 1395.19   41.53
  -1   6  -4 1429.59   42.16
  -1   6  -3   12.12    2.52
  -1   6  -3   14.33    2.20
  -1   6  -3   10.84    2.13
  -1   6  -2    6.26    1.73
  -1   6  -2    7.62    1.86
  -1   6  -2    6.68    1.72
  -1   6  -2    4.82    1.61
  -1   6  -1  590.18   21.03
  -1   6  -1  579.82   21.89
  -1   6  -1  578.35   21.61
  -1   6  -1  638.96   22.57
  -1   6   0   19.10    3.26
  -1   6   0   19.99    3.19
  -1   6   0   17.00    3.14
  -1   6   0   18.91    3.13
  -1   6   0   17.50    2.84
  -1   6   1    7.46    2.02
  -1   6   1    6.71    2.08
  -1   6   1    2.78    1.32
  -1   6   1    6.77    2.01
  -1   6   1    5.25    1.62
  -1   6   2   58.23    6.11
  -1   6   2   50.36    5.77
  -1   6   2   59.22    6.04
  -1   6   2   47.62    5.47
  -1   6   2   59.08    5.38
  -1   6   3   80.29    7.63
  -1   6   3   80.04    7.49
  -1   6   3   83.95    7.45
  -1   6   3   69.82    6.02
  -1   6   3   77.44    7.53
  -1   6   4   25.69    4.47
  -1   6   4   23.60    3.92
  -1   6   4   29.81    4.68
  -1   6   4   16.83    2.98
  -1   6   4   23.24    4.38
  -1   6   5  434.32   20.09
  -1   6   5  445.65   17.88
  -1   6   5  467.99   22.21
  -1   6   6   16.73    2.91
  -1   6   6   18.93    4.28
  -1   6   6   21.20    4.03
  -1   6   7   23.09    3.40
  -1   6   7   35.17    6.27
  -1   6   7   35.60    5.52
  -1   6   8  108.77    9.95
  -1   6   8  123.89   11.93
  -1   7 -12  216.75   12.61
  -1   7 -11  236.59   13.12
  -1   7 -10   11.15    2.59
  -1   7  -9   91.15    7.79
  -1   7  -8  365.27   17.12
  -1   7  -8  372.45   18.17
  -1   7  -7   63.71    6.64
  -1   7  -7   65.44    3.48
  -1   7  -7   63.49    6.33
  -1   7  -7   66.64    3.22
  -1   7  -6  121.22    6.59
  -1   7  -6  136.16    9.37
  -1   7  -6  123.63    5.96
  -1   7  -5  703.62   22.95
  -1   7  -5  676.80   21.20
  -1   7  -5  652.29   25.02
  -1   7  -5  681.05   20.88
  -1   7  -5  683.61   25.74
  -1   7  -4  545.83   18.87
  -1   7  -4  563.37   22.25
  -1   7  -4  566.98   18.90
  -1   7  -4  539.52   22.05
  -1   7  -3  448.97   17.36
  -1   7  -3  452.04   19.59
  -1   7  -3  487.47   17.67
  -1   7  -3  496.49   20.23
  -1   7  -2  173.24    9.99
  -1   7  -2  187.12   10.25
  -1   7  -2  210.03   12.16
  -1   7  -2  213.55   11.95
  -1   7  -1  192.46   10.97
  -1   7  -1  201.09   11.25
  -1   7  -1  197.45   11.95
  -1   7  -1  205.19   11.71
  -1   7  -1  214.29   12.41
  -1   7   0  316.42   15.30
  -1   7   0  279.19   15.06
  -1   7   0  314.90   15.14
  -1   7   0  316.27   16.18
  -1   7   0  295.74   14.69
  -1   7   1 1662.98   50.92
  -1   7   1 1776.31   51.48
  -1   7   1 1634.95   51.00
  -1   7   1 1703.17   49.71
  -1   7   1 1675.69   52.23
  -1   7   2  271.95   15.42
  -1   7   2  282.86   15.63
  -1   7   2  279.64   15.40
  -1   7   2  282.65   14.15
  -1   7   2  294.02   16.38
  -1   7   3  146.52   11.52
  -1   7   3  164.58   11.75
  -1   7   3  184.30   10.92
  -1   7   3  168.29   12.23
  -1   7   4    3.27    1.80
  -1   7   4    4.88    2.41
  -1   7   4    0.58    0.96
  -1   7   5   63.99    7.50
  -1   7   5   68.69    6.53
  -1   7   5   78.76    8.85
  -1   7   6    3.61    2.45
  -1   7   6    2.13    1.90
  -1   8 -11  141.60   10.58
  -1   8 -10   60.65    6.75
  -1   8  -9   15.88    3.39
  -1   8  -8   60.98    6.67
  -1   8  -7  115.62    9.51
  -1   8  -7  123.36    5.99
  -1   8  -7  122.97    5.52
  -1   8  -6    2.38    1.43
  -1   8  -6    2.78    1.45
  -1   8  -6    1.60    0.95
  -1   8  -6    3.51    1.11
  -1   8  -5  250.83   11.18
  -1   8  -5  227.58   13.83
  -1   8  -5  237.31   10.82
  -1   8  -4  130.68    8.15
  -1   8  -4  148.60   10.71
  -1   8  -4  127.87    9.93
  -1   8  -4  129.38    8.10
  -1   8  -3   30.36    4.65
  -1   8  -3   39.42    4.54
  -1   8  -3   33.24    4.20
  -1   8  -3   34.83    5.06
  -1   8  -2  637.06   24.26
  -1   8  -2  658.80   26.88
  -1   8  -2  710.47   25.35
  -1   8  -2  694.06   26.60
  -1   8  -1   49.55    5.86
  -1   8  -1   56.45    6.03
  -1   8  -1   47.80    5.72
  -1   8  -1   56.39    6.69
  -1   8   0  319.75   16.68
  -1   8   0  321.92   16.88
  -1   8   0  356.30   18.44
  -1   8   0  362.45   17.39
  -1   8   1  402.03   19.42
  -1   8   1  344.36   18.47
  -1   8   1  352.63   18.81
  -1   8   1  358.22   17.51
  -1   8   2 1023.89   37.50
  -1   8   2  995.50   37.21
  -1   8   2 1028.33   34.94
  -1   8   3  180.12   13.47
  -1   8   3  197.39   13.57
  -1   8   3  153.70   10.86
  -1   8   4  184.70   14.14
  -1   8   4  170.19   13.01
  -1   8   4  158.40   11.01
  -1   9 -10   45.47    6.23
  -1   9  -9  292.45   17.14
  -1   9  -8  381.29   20.05
  -1   9  -7  192.52    8.72
  -1   9  -7  180.94   12.96
  -1   9  -6  485.06   18.69
  -1   9  -6  461.59   16.80
  -1   9  -6  446.14   16.63
  -1   9  -6  474.62   22.45
  -1   9  -5  155.93    9.12
  -1   9  -5  149.22   11.71
  -1   9  -5  136.45    8.62
  -1   9  -4  123.08    8.45
  -1   9  -4  107.40    7.98
  -1   9  -4   95.69    9.40
  -1   9  -3   19.48    3.67
  -1   9  -3   22.94    4.29
  -1   9  -3   27.59    4.13
  -1   9  -2   99.68    8.43
  -1   9  -2  100.33    8.58
  -1   9  -2  110.88   10.06
  -1   9  -1   25.93    5.00
  -1   9  -1   26.61    4.43
  -1   9  -1   34.22    5.28
  -1   9   0  233.37   14.61
  -1   9   0  223.33   15.17
  -1   9   1  610.19   26.98
  -1   9   1  596.05   27.40
  -1   9   2  119.19   11.22
  -1   9   2  105.13   10.32
  -1  10  -6  293.54   18.22
  -1  10  -5  137.17    9.04
  -1  10  -5  131.58   11.79
  -1  10  -4   42.61    5.34
  -1  10  -4   40.63    6.37
  -1  10  -3   35.91    5.08
  -1  10  -3   33.86    6.06
  -1  10  -2  163.86   11.88
   0 -10   2    6.71    2.62
   0 -10   2    3.57    2.21
   0 -10   3  162.85   11.98
   0 -10   3  161.58   12.82
   0 -10   4    8.87    2.71
   0 -10   5   19.21    4.11
   0 -10   5   19.13    4.27
   0 -10   6   63.52    7.32
   0 -10   6   83.27    8.83
   0 -10   7  178.07   12.29
   0 -10   7  181.75   13.71
   0  -9  -2  184.58   14.29
   0  -9  -2  177.09   11.08
   0  -9  -1  313.50   18.88
   0  -9  -1  314.36   15.64
   0  -9   0  126.22   11.21
   0  -9   0  117.78   10.60
   0  -9   0  134.47    9.62
   0  -9   1  192.38   13.62
   0  -9   1  183.23   11.75
   0  -9   2   62.07    7.23
   0  -9   2   70.57    7.03
   0  -9   3  189.08   12.91
   0  -9   3  177.73   11.92
   0  -9   4    2.73    1.72
   0  -9   4    1.29    1.01
   0  -9   5   32.32    5.02
   0  -9   5   42.52    5.53
   0  -9   6   12.60    2.92
   0  -9   6    7.69    2.78
   0  -9   7   19.81    4.11
   0  -9   7   18.60    3.49
   0  -9   8   13.99    3.66
   0  -9   8   15.82    3.13
   0  -9   9   87.03    7.24
   0  -9   9   89.39    9.33
   0  -9  10   11.62    3.83
   0  -8  -4  146.46   12.50
   0  -8  -4  128.90    8.68
   0  -8  -3  252.01   16.33
   0  -8  -3  216.44   13.15
   0  -8  -3  260.11   12.80
   0  -8  -2  193.11   13.68
   0  -8  -1   80.24    8.49
   0  -8  -1   97.12    7.44
   0  -8   0  408.38   19.18
   0  -8   0  454.10   18.65
   0  -8   1  105.11    9.12
   0  -8   1   77.19    7.06
   0  -8   1   97.19    9.73
   0  -8   1   94.68    7.64
   0  -8   2  238.11   14.00
   0  -8   2  223.31   14.89
   0  -8   2  256.56   14.38
   0  -8   2  244.82   12.70
   0  -8   2  264.09   16.51
   0  -8   2  267.14   13.68
   0  -8   3  345.14   16.90
   0  -8   3  332.59   18.59
   0  -8   3  371.99   17.71
   0  -8   3  336.34   14.77
   0  -8   3  311.41   18.54
   0  -8   3  346.28   16.55
   0  -8   4 1105.54   36.65
   0  -8   4 1103.02   37.37
   0  -8   4 1147.16   41.40
   0  -8   4 1146.06   37.56
   0  -8   5 1499.06   45.31
   0  -8   5 1433.43   50.34
   0  -8   5 1476.93   46.51
   0  -8   5 1541.81   50.82
   0  -8   5 1530.98   47.13
   0  -8   6  138.67    9.28
   0  -8   6  132.51    9.93
   0  -8   6  134.93   11.58
   0  -8   6  142.10   10.48
   0  -8   7  296.93   14.10
   0  -8   7  290.24   15.55
   0  -8   7  285.17   17.46
   0  -8   7  283.02   15.93
   0  -8   8   24.74    3.47
   0  -8   8   22.19    4.38
   0  -8   8   22.34    4.10
   0  -8   9  133.32    8.40
   0  -8   9  138.92   11.21
   0  -8  10   88.91    6.42
   0  -8  10  107.01    9.85
   0  -8  11   13.69    3.67
   0  -7  -6   21.56    4.56
   0  -7  -6   17.95    3.69
   0  -7  -5   69.51    7.55
   0  -7  -5   79.18    6.12
   0  -7  -4  339.40   18.87
   0  -7  -4  352.41   18.73
   0  -7  -4  374.56   15.12
   0  -7  -3   59.66    7.12
   0  -7  -3   69.62    7.69
   0  -7  -3   67.21    7.34
   0  -7  -3   72.07    5.77
   0  -7  -2  177.52   12.53
   0  -7  -2  165.27   11.59
   0  -7  -2  191.32   10.01
   0  -7  -2  178.07   12.22
   0  -7  -1   42.28    5.27
   0  -7  -1   49.76    6.43
   0  -7  -1   38.86    5.09
   0  -7  -1   48.80    4.78
   0  -7   0  958.46   32.36
   0  -7   0  834.27   30.23
   0  -7   0  936.64   30.65
   0  -7   0  897.20   33.27
   0  -7   0  858.42   28.64
   0  -7   1   25.30    3.67
   0  -7   1   24.84    3.85
   0  -7   1   23.26    3.37
   0  -7   1   17.93    3.86
   0  -7   1   23.97    3.84
   0  -7   2   25.18    3.92
   0  -7   2   22.01    3.10
   0  -7   2   21.30    3.38
   0  -7   2   25.17    4.38
   0  -7   2   26.01    3.99
   0  -7   3  438.15   18.06
   0  -7   3  401.41   17.69
   0  -7   3  408.18   15.64
   0  -7   3  405.92   19.97
   0  -7   3  428.73   17.99
   0  -7   4  381.98   16.89
   0  -7   4  394.40   20.08
   0  -7   4  464.89   18.75
   0  -7   4  412.06   14.83
   0  -7   4  428.83   20.44
   0  -7   4  435.59   18.42
   0  -7   5 1916.08   52.83
   0  -7   5 1887.77   54.27
   0  -7   5 1933.41   57.78
   0  -7   5 1803.66   54.33
   0  -7   6 1621.32   53.91
   0  -7   6 1698.66   49.81
   0  -7   6 1714.31   53.08
   0  -7   6 1724.16   50.91
   0  -7   6 1684.28   47.72
   0  -7   7  262.66   16.47
   0  -7   7  247.52   13.48
   0  -7   7  260.94   14.42
   0  -7   7  248.05   15.11
   0  -7   7  268.72   12.21
   0  -7   8    1.09    1.34
   0  -7   8    0.07    0.64
   0  -7   8    1.04    1.42
   0  -7   8    0.61    0.95
   0  -7   9  756.95   27.33
   0  -7   9  750.02   29.34
   0  -7   9  724.69   28.58
   0  -7   9  702.60   23.14
   0  -7  10   37.67    5.48
   0  -7  10   24.08    4.42
   0  -7  10   32.50    3.34
   0  -7  10   19.27    3.64
   0  -7  10   36.34    3.59
   0  -7  11  814.55   23.91
   0  -7  11  805.75   30.98
   0  -7  11  838.55   32.06
   0  -7  12  211.90   13.10
   0  -7  12  222.02   13.85
   0  -7  12  223.37   14.90
   0  -6  -8  104.06   10.35
   0  -6  -7  169.33    7.07
   0  -6  -7  153.11   10.38
   0  -6  -6   14.45    3.68
   0  -6  -6   14.75    3.19
   0  -6  -5  581.03   25.07
   0  -6  -5  573.55   23.35
   0  -6  -5  569.90   19.45
   0  -6  -4 1964.55   59.59
   0  -6  -4 1946.74   58.61
   0  -6  -4 2106.67   60.57
   0  -6  -4 2028.41   53.60
   0  -6  -3   25.34    4.18
   0  -6  -3   22.41    3.83
   0  -6  -3   30.69    4.44
   0  -6  -3   21.80    2.92
   0  -6  -2  731.30   25.28
   0  -6  -2  677.02   25.46
   0  -6  -2  689.73   26.44
   0  -6  -2  656.97   25.75
   0  -6  -2  691.04   22.46
   0  -6  -1   22.13    2.90
   0  -6  -1   22.45    3.74
   0  -6  -1   20.04    3.33
   0  -6  -1   18.25    3.50
   0  -6  -1   22.07    3.33
   0  -6   0   14.97    2.96
   0  -6   0   12.88    2.60
   0  -6   0   13.89    2.44
   0  -6   0   14.26    2.75
   0  -6   0   14.62    3.07
   0  -6   1   85.50    6.79
   0  -6   1   87.74    6.86
   0  -6   1   89.11    6.31
   0  -6   1  102.17    8.22
   0  -6   1   82.87    6.15
   0  -6   2   94.64    6.97
   0  -6   2   91.09    6.86
   0  -6   2  103.21    6.46
   0  -6   2   99.02    6.98
   0  -6   2   91.99    7.87
   0  -6   3   99.34    6.98
   0  -6   3  108.76    7.51
   0  -6   3  100.09    5.92
   0  -6   3  111.01    7.51
   0  -6   3  106.53    8.42
   0  -6   4   44.62    4.76
   0  -6   4   47.95    5.71
   0  -6   4   53.94    3.79
   0  -6   4   52.46    5.12
   0  -6   4   48.16    5.62
   0  -6   4   45.63    4.45
   0  -6   5  910.66   29.99
   0  -6   5  965.71   25.22
   0  -6   5  904.97   30.56
   0  -6   5  926.28   32.45
   0  -6   6   47.21    5.98
   0  -6   6   52.80    5.15
   0  -6   6   49.73    5.67
   0  -6   6   54.37    4.66
   0  -6   7   83.09    8.43
   0  -6   7   92.78    7.08
   0  -6   7   90.84    7.76
   0  -6   7   86.00    7.35
   0  -6   7   88.73    5.90
   0  -6   8    6.86    2.24
   0  -6   8    8.26    1.67
   0  -6   8   10.29    2.62
   0  -6   8    4.04    1.64
   0  -6   9  359.42   19.87
   0  -6   9  400.84   17.21
   0  -6   9  405.75   18.40
   0  -6   9  387.17   18.30
   0  -6   9  380.20   13.92
   0  -6  10    4.77    1.93
   0  -6  10    3.44    0.94
   0  -6  10    4.08    1.70
   0  -6  10    3.04    0.94
   0  -6  10    2.07    1.66
   0  -6  10    2.46    1.18
   0  -6  11  534.45   16.64
   0  -6  11  536.50   22.15
   0  -6  11  534.86   21.71
   0  -6  11  578.02   24.29
   0  -6  11  551.60   16.90
   0  -6  12  204.10   11.79
   0  -6  12  201.01   12.15
   0  -6  12  219.14   14.12
   0  -6  13   57.94    7.14
   0  -6  13   51.40    5.88
   0  -5  -9   48.67    6.76
   0  -5  -8  166.91   12.24
   0  -5  -8  154.94    8.92
   0  -5  -7  115.54    9.70
   0  -5  -7  100.33    5.03
   0  -5  -7  101.97    7.40
   0  -5  -6    3.29    1.77
   0  -5  -6    0.64    0.91
   0  -5  -5   61.18    6.43
   0  -5  -5   65.43    6.03
   0  -5  -5   69.52    4.85
   0  -5  -4 1705.81   49.56
   0  -5  -4 1681.72   48.10
   0  -5  -4 1617.71   49.17
   0  -5  -4 1599.68   43.50
   0  -5  -3 1409.93   43.87
   0  -5  -3 1503.72   44.27
   0  -5  -3 1441.39   43.41
   0  -5  -3 1481.20   39.46
   0  -5  -2    3.46    1.02
   0  -5  -2    4.18    1.84
   0  -5  -2    3.46    1.68
   0  -5  -2    1.97    1.42
   0  -5  -2    4.46    1.62
   0  -5  -1  556.41   20.77
   0  -5  -1  584.87   20.24
   0  -5  -1  584.25   20.59
   0  -5  -1  540.99   21.22
   0  -5  -1  562.41   18.48
   0  -5   0   68.28    5.63
   0  -5   0   51.50    4.66
   0  -5   0   57.24    4.82
   0  -5   0   58.86    4.58
   0  -5   0   55.98    5.55
   0  -5   1   22.73    3.01
   0  -5   1   21.57    2.74
   0  -5   1   23.62    3.03
   0  -5   1   23.91    2.79
   0  -5   1   24.96    3.55
   0  -5   2  483.38   18.04
   0  -5   2  551.46   18.84
   0  -5   2  529.54   17.06
   0  -5   2  570.95   18.81
   0  -5   2  499.30   20.13
   0  -5   3    4.23    1.40
   0  -5   3    5.52    1.07
   0  -5   3    6.75    1.61
   0  -5   3    1.87    1.08
   0  -5   4  961.20   31.59
   0  -5   4  906.05   28.63
   0  -5   4  959.23   25.09
   0  -5   4  921.24   29.19
   0  -5   4  922.59   30.74
   0  -5   4  958.85   27.93
   0  -5   5 1836.87   50.70
   0  -5   5 1862.66   45.08
   0  -5   5 1943.37   51.99
   0  -5   5 1948.94   53.39
   0  -5   5 1817.27   48.96
   0  -5   6  499.63   16.81
   0  -5   6  563.18   22.41
   0  -5   6  531.41   18.86
   0  -5   6  472.05   19.12
   0  -5   6  534.85   20.40
   0  -5   7    2.17    1.22
   0  -5   7    2.72    0.93
   0  -5   7    3.34    1.78
   0  -5   7    2.66    1.55
   0  -5   7    2.44    1.11
   0  -5   8  403.52   19.47
   0  -5   8  409.65   16.31
   0  -5   8  410.92   17.16
   0  -5   8  391.48   17.24
   0  -5   8  391.10   13.64
   0  -5   9  161.95   11.94
   0  -5   9  172.28    7.39
   0  -5   9  159.25    9.51
   0  -5   9  171.79   10.13
   0  -5   9  187.06   11.15
   0  -5   9  174.70    7.60
   0  -5  10  701.18   20.23
   0  -5  10  684.72   28.61
   0  -5  10  707.14   24.68
   0  -5  10  702.13   24.61
   0  -5  10  681.09   26.11
   0  -5  11  204.03    7.83
   0  -5  11  198.65   10.87
   0  -5  11  183.55   10.85
   0  -5  11  215.07   14.40
   0  -5  11  201.23   12.54
   0  -5  12  189.91   13.88
   0  -5  12  217.38   10.64
   0  -5  12  207.31    7.46
   0  -5  12  207.27   11.73
   0  -5  12  187.01   12.47
   0  -5  12  199.96    7.30
   0  -5  13   13.73    2.87
   0  -5  13   19.60    3.93
   0  -4 -10  385.12   19.88
   0  -4  -9   19.50    2.18
   0  -4  -9   22.91    4.16
   0  -4  -8   82.10    7.81
   0  -4  -8   78.93    5.27
   0  -4  -8   82.99    3.85
   0  -4  -7   87.67    4.47
   0  -4  -7   91.61    8.01
   0  -4  -7   83.23    5.77
   0  -4  -6   89.53    6.23
   0  -4  -6   97.54    8.24
   0  -4  -6   76.66    7.14
   0  -4  -5  167.96   10.36
   0  -4  -5  180.23    9.40
   0  -4  -5  151.98   10.26
   0  -4  -5  181.89    7.83
   0  -4  -4 1633.84   48.09
   0  -4  -4 1711.37   46.88
   0  -4  -4 1765.93   49.20
   0  -4  -4 1661.05   43.58
   0  -4  -3  557.73   20.86
   0  -4  -3  570.14   21.06
   0  -4  -3  603.50   20.62
   0  -4  -3  591.67   17.86
   0  -4  -2  802.65   24.08
   0  -4  -2  772.50   24.69
   0  -4  -2  845.15   25.41
   0  -4  -2  729.72   21.63
   0  -4  -1  512.40   18.07
   0  -4  -1  500.74   17.28
   0  -4  -1  551.87   18.21
   0  -4  -1  509.77   16.12
   0  -4  -1  477.50   18.26
   0  -4   0    3.36    1.48
   0  -4   0    2.80    0.81
   0  -4   0    4.43    1.15
   0  -4   0    3.16    1.08
   0  -4   0    3.74    1.12
   0  -4   1  241.71   10.39
   0  -4   1  273.93   12.03
   0  -4   1  254.62   10.47
   0  -4   1  251.03    9.75
   0  -4   1  240.65    9.98
   0  -4   2 7305.67  176.88
   0  -4   2 6922.27  174.13
   0  -4   2 7153.10  174.64
   0  -4   2 7190.22  174.57
   0  -4   3  141.88    7.28
   0  -4   3  137.39    7.36
   0  -4   3  141.49    5.64
   0  -4   3  148.12    8.40
   0  -4   3  146.05    7.01
   0  -4   4   89.88    6.81
   0  -4   4   87.71    5.59
   0  -4   4   88.11    5.91
   0  -4   4   92.88    3.64
   0  -4   4   91.96    6.40
   0  -4   4   85.70    5.01
   0  -4   5 1123.78   35.27
   0  -4   5 1149.57   32.38
   0  -4   5 1093.30   32.95
   0  -4   5 1219.49   34.27
   0  -4   5 1111.14   30.51
   0  -4   6  509.17   17.76
   0  -4   6  507.18   18.63
   0  -4   6  537.15   18.97
   0  -4   6  547.14   20.97
   0  -4   7  438.51   19.34
   0  -4   7  480.10   16.95
   0  -4   7  471.22   17.85
   0  -4   7  456.42   17.18
   0  -4   8 1516.59   39.17
   0  -4   8 1604.75   47.41
   0  -4   8 1467.82   42.46
   0  -4   8 1509.03   42.70
   0  -4   8 1608.97   44.72
   0  -4   9   98.14    4.94
   0  -4   9   97.16    8.32
   0  -4   9  101.00    3.74
   0  -4   9   94.09    6.64
   0  -4   9   96.65    6.45
   0  -4   9   94.30    7.28
   0  -4   9   93.66    3.64
   0  -4  10   21.80    3.51
   0  -4  10   27.85    1.76
   0  -4  10   24.36    2.32
   0  -4  10   27.15    4.44
   0  -4  10   26.45    3.51
   0  -4  10   24.42    3.08
   0  -4  10   24.20    1.95
   0  -4  11  699.39   20.07
   0  -4  11  716.30   19.39
   0  -4  11  712.41   28.21
   0  -4  11  691.15   21.82
   0  -4  11  685.13   25.81
   0  -4  11  675.28   24.11
   0  -4  11  701.67   19.65
   0  -4  12   61.01    3.74
   0  -4  12   62.83    3.99
   0  -4  12   55.06    3.71
   0  -4  12   65.32    7.28
   0  -4  12   61.88    5.81
   0  -4  12   60.43    6.31
   0  -4  12   59.78    3.93
   0  -4  13    1.26    1.32
   0  -4  13    2.26    1.90
   0  -4  13    2.40    1.31
   0  -4  14   14.01    3.30
   0  -3 -11   63.97    7.16
   0  -3  -9   59.09    6.31
   0  -3  -8   46.50    3.16
   0  -3  -8   47.20    5.41
   0  -3  -8   49.57    3.15
   0  -3  -7    0.61    0.86
   0  -3  -7    1.89    0.90
   0  -3  -7    3.76    0.88
   0  -3  -6  279.75   13.17
   0  -3  -6  245.78    8.80
   0  -3  -6  251.67   10.25
   0  -3  -6  269.71   13.54
   0  -3  -5  709.17   24.61
   0  -3  -5  741.92   22.50
   0  -3  -5  777.07   25.93
   0  -3  -4  897.98   28.13
   0  -3  -4  969.89   24.83
   0  -3  -4  925.63   26.61
   0  -3  -3   31.43    3.45
   0  -3  -3   27.84    3.29
   0  -3  -3   30.60    3.09
   0  -3  -3   28.11    2.33
   0  -3  -2 4426.77  111.89
   0  -3  -2 4607.17  112.07
   0  -3  -2 4396.67  108.78
   0  -3  -2 4566.78  111.63
   0  -3  -1  199.07    8.62
   0  -3  -1  191.01    8.07
   0  -3  -1  187.10    8.37
   0  -3  -1  183.84    7.16
   0  -3  -1  191.19    8.70
   0  -3   0 3847.61  103.29
   0  -3   0 3910.71  103.00
   0  -3   0 3949.19  102.93
   0  -3   0 3801.32  102.15
   0  -3   1  721.70   22.59
   0  -3   1  760.49   21.56
   0  -3   1  732.53   21.47
   0  -3   1  750.56   21.25
   0  -3   1  771.46   20.73
   0  -3   2 1282.26   36.13
   0  -3   2 1323.02   34.42
   0  -3   2 1303.72   34.77
   0  -3   2 1332.18   34.97
   0  -3   2 1335.03   32.95
   0  -3   3 4907.74  119.36
   0  -3   3 4918.31  117.95
   0  -3   3 4933.19  118.52
   0  -3   4  506.24   16.04
   0  -3   4  503.72   16.57
   0  -3   4  513.18   16.99
   0  -3   5 1052.49   30.68
   0  -3   5  959.90   27.46
   0  -3   5  958.33   28.24
   0  -3   5  963.83   28.06
   0  -3   6    6.73    1.60
   0  -3   6    5.99    1.68
   0  -3   6    8.56    1.20
   0  -3   6    9.13    1.74
   0  -3   6    9.32    1.67
   0  -3   6    9.59    0.89
   0  -3   7  546.22   15.65
   0  -3   7  545.09   14.95
   0  -3   7  552.51   18.08
   0  -3   7  536.79   17.57
   0  -3   7  509.81   20.16
   0  -3   7  537.78   18.86
   0  -3   7  541.91   14.94
   0  -3   8  530.93   15.49
   0  -3   8  529.65   15.47
   0  -3   8  535.03   20.68
   0  -3   8  526.98   16.89
   0  -3   8  525.21   18.93
   0  -3   8  499.43   15.26
   0  -3   8  510.83   17.85
   0  -3   9  585.35   16.92
   0  -3   9  591.81   22.58
   0  -3   9  563.95   17.46
   0  -3   9  555.40   17.32
   0  -3   9  559.73   19.50
   0  -3   9  533.74   20.20
   0  -3   9  556.86   17.05
   0  -3  10  397.54   13.06
   0  -3  10  384.04   12.48
   0  -3  10  391.51   17.76
   0  -3  10  396.43   14.14
   0  -3  10  391.74   15.62
   0  -3  10  393.40   16.51
   0  -3  10  388.99   13.68
   0  -3  11  225.55    8.93
   0  -3  11  218.88   12.77
   0  -3  11  220.19   10.07
   0  -3  11  230.79   11.38
   0  -3  11  211.26   11.73
   0  -3  11  206.10    6.33
   0  -3  11  230.81   10.03
   0  -3  12  129.33    9.57
   0  -3  12  112.78    7.39
   0  -3  12  116.98    6.13
   0  -3  12  116.43    8.09
   0  -3  12  116.25    8.57
   0  -3  12  118.39    7.20
   0  -3  13   11.81    2.94
   0  -3  13   14.34    3.17
   0  -3  13   16.75    2.76
   0  -3  13   16.49    3.05
   0  -3  14    3.83    1.88
   0  -2 -12  468.80   21.13
   0  -2 -11  238.44   13.64
   0  -2 -10  405.26   18.16
   0  -2  -9  201.42   11.48
   0  -2  -8    2.97    1.44
   0  -2  -8    4.20    1.00
   0  -2  -7  324.60   14.34
   0  -2  -7  330.65   11.29
   0  -2  -7  344.90    9.86
   0  -2  -6 2426.08   60.23
   0  -2  -6 2471.08   64.73
   0  -2  -6 2420.06   59.85
   0  -2  -5    4.64    0.91
   0  -2  -5    2.01    0.73
   0  -2  -5    3.08    0.76
   0  -2  -5    3.55    1.07
   0  -2  -4  525.64   17.50
   0  -2  -4  521.39   15.64
   0  -2  -4  514.26   17.97
   0  -2  -3  322.56   12.08
   0  -2  -3  333.36   12.53
   0  -2  -3  330.72   11.06
   0  -2  -3  335.92   10.08
   0  -2  -2 2967.29   76.81
   0  -2  -2 3322.05   77.56
   0  -2  -2 3317.00   74.82
   0  -2  -2 3047.60   76.20
   0  -2  -1   18.89    2.01
   0  -2  -1   17.05    1.85
   0  -2  -1   18.17    1.79
   0  -2  -1   15.77    1.82
   0  -2  -1   16.40    1.43
   0  -2   0  635.40   15.72
   0  -2   0  615.43   15.25
   0  -2   0  599.83   14.82
   0  -2   1  975.17   27.24
   0  -2   1  990.85   26.31
   0  -2   1 1068.00   26.53
   0  -2   1 1031.08   25.53
   0  -2   1 1009.24   26.19
   0  -2   2   84.91    4.09
   0  -2   2   85.70    4.57
   0  -2   2   80.45    4.19
   0  -2   2   88.25    2.98
   0  -2   3    8.71    1.30
   0  -2   3    9.09    1.23
   0  -2   3    8.61    1.32
   0  -2   4  741.78   18.43
   0  -2   4  741.40   22.58
   0  -2   4  763.80   20.83
   0  -2   4  732.49   18.37
   0  -2   4  762.80   21.38
   0  -2   4  740.74   20.89
   0  -2   5   66.04    3.20
   0  -2   5   67.43    5.01
   0  -2   5   63.42    3.08
   0  -2   5   69.30    4.14
   0  -2   5   55.67    4.03
   0  -2   5   63.70    3.02
   0  -2   5   59.93    3.68
   0  -2   6  493.89   17.57
   0  -2   6  502.56   14.51
   0  -2   6  483.35   15.61
   0  -2   6  494.08   14.65
   0  -2   6  467.88   16.10
   0  -2   6  489.76   14.29
   0  -2   6  490.62   14.20
   0  -2   7 2437.39   60.92
   0  -2   7 2590.90   65.94
   0  -2   7 2560.71   62.10
   0  -2   7 2481.91   63.07
   0  -2   7 2465.87   60.72
   0  -2   7 2516.69   63.99
   0  -2   7 2490.52   61.87
   0  -2   8  528.00   16.12
   0  -2   8  528.25   14.75
   0  -2   8  524.05   19.47
   0  -2   8  549.84   17.35
   0  -2   8  571.29   18.15
   0  -2   8  518.29   18.27
   0  -2   8  520.54   16.96
   0  -2   9 1681.96   43.41
   0  -2   9 1675.25   47.61
   0  -2   9 1684.86   45.33
   0  -2   9 1625.02   46.05
   0  -2   9 1630.63   45.33
   0  -2   9 1744.04   45.24
   0  -2  10  216.69   11.51
   0  -2  10  211.79   10.47
   0  -2  10  221.93   11.03
   0  -2  10  232.47   10.59
   0  -2  10  214.63   10.49
   0  -2  11  146.09    7.47
   0  -2  11  147.19    9.31
   0  -2  11  141.33    8.74
   0  -2  11  134.05    8.30
   0  -2  11  137.86    8.70
   0  -2  11  143.47    8.55
   0  -2  12  459.56   18.76
   0  -2  12  400.31   17.55
   0  -2  12  416.64   15.51
   0  -2  12  432.91   17.80
   0  -2  12  448.76   17.81
   0  -2  12  443.42   17.84
   0  -2  13   26.56    3.87
   0  -2  13   26.00    3.88
   0  -2  13   19.92    3.56
   0  -2  13   18.70    3.19
   0  -2  14  669.71   25.10
   0  -2  14  665.90   25.31
   0  -1 -13   15.73    3.34
   0  -1 -12  105.33    8.41
   0  -1 -11  466.54   19.37
   0  -1 -10   31.16    4.04
   0  -1  -9 2602.49   69.07
   0  -1  -8   97.62    6.63
   0  -1  -8   95.88    5.51
   0  -1  -7  292.32   12.26
   0  -1  -6 2601.65   65.34
   0  -1  -6 2524.66   62.89
   0  -1  -5  818.11   19.63
   0  -1  -5  767.67   21.46
   0  -1  -5  756.65   23.20
   0  -1  -5  769.15   24.14
   0  -1  -4    8.39    1.44
   0  -1  -4    7.93    1.02
   0  -1  -4    6.78    1.36
   0  -1  -4    6.98    0.80
   0  -1  -3    7.19    1.21
   0  -1  -3    7.98    1.37
   0  -1  -3    6.46    0.83
   0  -1  -2  828.34   22.84
   0  -1  -2  871.39   21.57
   0  -1  -2  809.39   22.45
   0  -1  -2  862.18   21.05
   0  -1  -1 1708.94   43.43
   0  -1  -1 1754.12   43.03
   0  -1  -1 1719.10   43.58
   0  -1   0  620.07   14.93
   0  -1   0  543.02   14.54
   0  -1   1   26.67    1.52
   0  -1   1   20.65    1.43
   0  -1   2    7.79    0.91
   0  -1   2    9.49    0.98
   0  -1   2    7.63    1.13
   0  -1   2    9.73    0.97
   0  -1   3   26.37    1.50
   0  -1   3   20.99    2.01
   0  -1   3   25.04    1.80
   0  -1   3   26.10    1.59
   0  -1   3   24.28    1.94
   0  -1   3   25.08    1.52
   0  -1   3   23.80    1.62
   0  -1   4   16.84    1.40
   0  -1   4   20.05    2.15
   0  -1   4   17.33    1.60
   0  -1   4   18.41    1.70
   0  -1   4   16.76    1.73
   0  -1   4   19.43    1.40
   0  -1   4   18.72    1.64
   0  -1   5  727.99   19.86
   0  -1   5  694.36   21.57
   0  -1   5  744.10   20.62
   0  -1   5  753.48   18.57
   0  -1   5  768.82   20.87
   0  -1   5  755.58   21.02
   0  -1   5  709.38   20.44
   0  -1   6   26.84    2.26
   0  -1   6   25.44    2.79
   0  -1   6   25.54    2.45
   0  -1   6   26.68    2.65
   0  -1   6   19.36    2.24
   0  -1   6   26.86    2.56
   0  -1   7  683.13   20.16
   0  -1   7  704.06   21.86
   0  -1   7  726.09   21.13
   0  -1   7  712.31   21.72
   0  -1   7  679.57   21.04
   0  -1   7  686.22   21.41
   0  -1   8  971.54   27.45
   0  -1   8  955.56   28.78
   0  -1   8 1030.92   28.47
   0  -1   8  976.18   29.26
   0  -1   8  964.55   28.28
   0  -1   8  942.73   28.84
   0  -1   9  746.57   23.86
   0  -1   9  765.17   24.95
   0  -1   9  718.98   23.16
   0  -1   9  725.64   23.28
   0  -1   9  739.95   24.38
   0  -1   9  769.33   22.80
   0  -1  10   84.76    5.72
   0  -1  10   78.45    5.82
   0  -1  10   88.02    7.05
   0  -1  10   85.75    6.10
   0  -1  10   81.13    6.51
   0  -1  11    4.39    1.44
   0  -1  11    2.13    0.90
   0  -1  11    4.35    1.89
   0  -1  11    2.24    1.08
   0  -1  11    3.09    1.42
   0  -1  12   23.71    3.39
   0  -1  12   25.92    3.33
   0  -1  12   25.93    4.05
   0  -1  12   24.85    3.62
   0  -1  12   28.16    4.20
   0  -1  13  261.81   13.31
   0  -1  13  264.29   15.17
   0  -1  13  277.26   13.21
   0  -1  13  272.92   15.03
   0   0 -13  164.67   10.30
   0   0 -12  122.86    8.35
   0   0 -11  219.01   11.24
   0   0 -10   78.09    5.95
   0   0  -9  970.23   29.38
   0   0  -8   62.69    4.76
   0   0  -8   64.62    4.81
   0   0  -7  616.20   19.51
   0   0  -7  632.37   19.71
   0   0  -6 1645.39   42.91
   0   0  -6 1649.53   42.79
   0   0  -5  611.84   17.90
   0   0  -4    4.18    0.84
   0   0  -4    3.56    0.77
   0   0  -4    4.61    0.91
   0   0  -3 1082.57   26.97
   0   0  -3 1064.62   27.00
   0   0  -3 1042.36   27.41
   0   0  -2  797.71   19.35
   0   0  -2  771.33   19.33
   0   0  -2  797.77   19.75
   0   0   2  767.22   19.41
   0   0   2  811.40   19.45
   0   0   2  783.80   19.84
   0   0   2  731.94   19.72
   0   0   3 1048.32   26.97
   0   0   3 1076.29   26.85
   0   0   3 1053.82   27.64
   0   0   3 1105.90   27.79
   0   0   4    2.20    0.57
   0   0   4    2.43    0.60
   0   0   4    1.68    0.67
   0   0   4    2.02    0.69
   0   0   5  610.25   19.51
   0   0   5  651.86   18.40
   0   0   5  647.18   18.70
   0   0   5  680.43   19.97
   0   0   6 1759.10   46.70
   0   0   6 1742.47   46.66
   0   0   7  717.66   21.77
   0   0   7  671.78   22.84
   0   0   7  748.02   23.47
   0   0   8   69.05    4.99
   0   0   8   76.18    6.14
   0   0   8   63.76    5.45
   0   0   9  940.18   28.57
   0   0   9  918.57   28.32
   0   0   9  973.68   27.90
   0   0   9  909.54   30.44
   0   0   9  978.01   31.23
   0   0  10   70.50    5.74
   0   0  10   71.10    5.70
   0   0  10   68.10    6.62
   0   0  10   82.66    5.64
   0   0  10   84.22    7.19
   0   0  11  189.87   10.37
   0   0  11  205.61   12.73
   0   0  11  207.75   10.04
   0   0  11  215.40   12.68
   0   0  11  201.25    9.44
   0   0  11  204.34   10.83
   0   0  12  121.88    9.97
   0   0  12  119.75    8.21
   0   0  12  114.31    7.45
   0   0  12  131.09   10.06
   0   0  12  113.28    6.96
   0   0  12  118.38    8.36
   0   0  13  178.28    9.63
   0   0  13  170.75   12.23
   0   1 -12   27.30    3.41
   0   1 -11    1.48    1.03
   0   1 -10   84.57    5.69
   0   1  -9  734.95   22.52
   0   1  -8  959.33   27.10
   0   1  -7  706.35   20.45
   0   1  -6   21.48    2.06
   0   1  -6   24.56    2.83
   0   1  -5  713.60   19.38
   0   1  -5  719.48   21.54
   0   1  -4   16.61    1.39
   0   1  -4   15.28    1.89
   0   1  -3   27.33    2.36
   0   1  -3   27.10    1.88
   0   1  -3   27.81    1.55
   0   1  -3   26.12    1.65
   0   1  -2    7.54    0.97
   0   1  -2    8.59    0.92
   0   1  -2    8.12    0.92
   0   1  -1   37.06    1.84
   0   1  -1   44.14    2.06
   0   1   0 1940.03   35.07
   0   1   0 1152.08   33.59
   0   1   1 1784.04   43.75
   0   1   1 1895.32   43.52
   0   1   1 1982.50   44.12
   0   1   1 1708.61   43.22
   0   1   1 1663.66   43.78
   0   1   2  850.37   22.59
   0   1   2  850.19   22.96
   0   1   2  858.74   21.58
   0   1   2  879.91   23.18
   0   1   2  840.33   21.07
   0   1   3   11.44    1.51
   0   1   3   11.48    1.68
   0   1   3   12.05    1.69
   0   1   3   10.95    1.07
   0   1   4    8.97    1.09
   0   1   4    8.39    1.41
   0   1   4    9.14    1.62
   0   1   4   10.37    1.71
   0   1   5  740.93   23.29
   0   1   5  861.67   25.26
   0   1   5  778.13   24.70
   0   1   5  837.47   21.67
   0   1   6 2472.21   65.09
   0   1   6 2643.09   62.68
   0   1   6 2604.39   67.18
   0   1   6 2464.09   66.78
   0   1   7  288.18   12.17
   0   1   7  291.73   13.50
   0   1   7  290.80   13.43
   0   1   7  295.93   10.24
   0   1   8  105.26    6.93
   0   1   8  104.46    7.86
   0   1   8  106.69    7.95
   0   1   8  105.39    5.56
   0   1   9 2637.18   68.64
   0   1   9 2661.85   71.78
   0   1   9 2582.15   71.00
   0   1   9 2502.27   64.40
   0   1  10   22.52    2.75
   0   1  10   26.41    2.83
   0   1  10   26.62    3.75
   0   1  10   19.27    3.76
   0   1  10   22.72    4.04
   0   1  11  416.28   20.61
   0   1  11  435.16   17.36
   0   1  11  440.92   15.77
   0   1  11  437.82   20.56
   0   1  11  410.99   14.90
   0   1  11  415.66   18.22
   0   1  12   85.35    7.15
   0   1  12   95.19    7.31
   0   1  12   88.11    6.01
   0   1  12   83.14    8.52
   0   1  12   87.50    7.69
   0   1  13   14.34    3.72
   0   1  13   16.53    3.00
   0   2  -5   62.95    3.86
   0   2  -4  724.62   19.87
   0   2  -4  686.01   19.79
   0   2  -3    7.49    1.24
   0   2  -3   11.61    1.42
   0   2  -3    8.44    1.24
   0   2  -2   82.47    2.82
   0   2  -2   84.99    4.07
   0   2  -2   80.55    4.37
   0   2  -2   77.48    4.00
   0   2  -1  922.30   25.97
   0   2  -1  974.23   25.30
   0   2  -1  972.25   25.19
   0   2  -1  954.77   24.30
   0   2  -1 1008.36   25.17
   0   2   0  632.91   18.18
   0   2   0  626.38   17.02
   0   2   0  602.96   17.39
   0   2   0  633.55   17.36
   0   2   0  636.16   17.69
   0   2   1   13.88    1.72
   0   2   1   15.60    1.69
   0   2   1   14.93    1.80
   0   2   1   15.99    1.81
   0   2   1   15.44    1.41
   0   2   1   15.32    1.79
   0   2   2 3099.74   77.52
   0   2   2 3039.45   76.47
   0   2   2 3036.33   76.49
   0   2   2 3028.46   77.71
   0   2   3  385.78   13.01
   0   2   3  342.06   12.97
   0   2   3  337.79   11.75
   0   2   3  350.99   13.16
   0   2   3  345.22   10.46
   0   2   4  529.27   17.52
   0   2   4  511.04   18.16
   0   2   4  512.55   16.49
   0   2   4  537.07   18.41
   0   2   4  523.56   14.80
   0   2   5    1.19    0.43
   0   2   5    3.12    1.19
   0   2   5   -0.18    0.95
   0   2   5    3.00    0.92
   0   2   5    1.12    0.67
   0   2   6 2361.18   62.38
   0   2   6 2347.44   64.06
   0   2   6 2384.84   60.93
   0   2   6 2348.14   64.06
   0   2   7  331.19   15.68
   0   2   7  331.02   13.30
   0   2   7  336.61   15.64
   0   2   7  321.21   14.18
   0   2   8    1.21    1.00
   0   2   8   -0.84    1.19
   0   2   8    1.41    0.94
   0   2   8    1.22    0.93
   0   2   9  214.51   13.18
   0   2   9  181.52    9.99
   0   2   9  193.58   12.45
   0   2   9  194.10    8.24
   0   2  10  360.39   19.42
   0   2  10  404.95   16.76
   0   2  10  400.50   13.85
   0   2  10  428.95   20.46
   0   2  10  406.25   18.36
   0   2  11  237.37   12.46
   0   2  11  233.56   10.04
   0   2  11  231.76   15.16
   0   2  11  221.97   13.50
   0   2  12  468.30   19.75
   0   2  12  484.95   24.05
   0   3  -7  565.05   18.41
   0   3  -6    9.30    1.59
   0   3  -5  934.44   26.65
   0   3  -5  946.00   27.31
   0   3  -4  508.52   16.57
   0   3  -4  545.91   17.29
   0   3  -4  520.19   17.22
   0   3  -3 4955.99  120.73
   0   3  -3 4988.04  119.95
   0   3  -3 5013.29  119.61
   0   3  -2 1327.88   35.06
   0   3  -2 1344.12   33.13
   0   3  -2 1285.44   36.15
   0   3  -2 1326.22   35.10
   0   3  -1  808.86   21.74
   0   3  -1  781.62   23.80
   0   3  -1  753.32   22.46
   0   3  -1  796.26   22.44
   0   3  -1  775.69   21.71
   0   3   0 3854.04   95.63
   0   3   0 4027.27   95.41
   0   3   0 3987.84   96.94
   0   3   0 4093.54   95.67
   0   3   0 3897.91   96.13
   0   3   1  218.76    8.97
   0   3   1  187.47    8.25
   0   3   1  213.38    9.19
   0   3   1  193.26    7.64
   0   3   1  211.75    8.96
   0   3   1  188.14    8.61
   0   3   2 4566.54  111.81
   0   3   2 4611.79  110.75
   0   3   2 4563.17  111.19
   0   3   2 4557.77  108.96
   0   3   2 4523.15  111.96
   0   3   2 4614.15  111.90
   0   3   3   27.71    3.39
   0   3   3   19.44    2.81
   0   3   3   29.40    3.06
   0   3   3   29.04    2.41
   0   3   3   33.40    3.56
   0   3   4  958.02   29.13
   0   3   4  986.86   30.13
   0   3   4  906.67   27.58
   0   3   4  943.63   25.40
   0   3   4  884.79   29.36
   0   3   5  747.30   26.16
   0   3   5  703.81   23.53
   0   3   5  757.11   21.29
   0   3   5  731.79   25.86
   0   3   5  811.96   25.79
   0   3   6  288.59   14.38
   0   3   6  243.66   11.46
   0   3   6  261.12    9.59
   0   3   6  245.95   13.33
   0   3   6  247.93   12.61
   0   3   7    2.10    1.07
   0   3   7    6.56    2.28
   0   3   7    4.47    1.04
   0   3   7    4.42    1.85
   0   3   7    2.16    1.18
   0   3   8   52.98    5.20
   0   3   8   56.01    6.57
   0   3   8   48.11    3.66
   0   3   8   50.07    6.18
   0   3   8   52.58    5.72
   0   3   9   53.14    6.12
   0   3   9   56.12    6.82
   0   3   9   56.74    5.68
   0   3   9   65.02    7.54
   0   3   9   58.82    4.19
   0   3  10  196.95   13.15
   0   3  10  253.83   13.11
   0   3  10  211.09    9.11
   0   3  10  246.89   15.64
   0   3  11   70.25    8.37
   0   3  11   56.70    6.17
   0   4  -9  106.75    6.95
   0   4  -8 1543.54   42.84
   0   4  -7  452.38   16.44
   0   4  -6  525.61   17.90
   0   4  -6  505.74   18.33
   0   4  -5 1108.67   32.45
   0   4  -5 1155.76   33.13
   0   4  -4   89.11    3.55
   0   4  -4   79.32    5.44
   0   4  -4   90.92    3.55
   0   4  -4   84.97    5.79
   0   4  -3  137.49    5.51
   0   4  -3  142.50    7.42
   0   4  -3  143.09    5.60
   0   4  -3  132.28    7.94
   0   4  -3  156.18    7.72
   0   4  -2 7052.29  174.76
   0   4  -2 7070.29  174.45
   0   4  -1  245.78   10.46
   0   4  -1  262.89    9.82
   0   4  -1  238.42   11.20
   0   4  -1  250.58   10.06
   0   4  -1  264.44    9.93
   0   4   0    3.70    1.30
   0   4   0    3.40    0.90
   0   4   0    3.81    1.22
   0   4   0    3.01    0.94
   0   4   0    4.76    1.16
   0   4   0    3.50    1.00
   0   4   1  515.42   17.44
   0   4   1  487.50   17.31
   0   4   1  478.28   15.95
   0   4   1  501.62   18.06
   0   4   1  481.52   17.38
   0   4   1  493.55   17.79
   0   4   2  763.64   24.87
   0   4   2  762.34   24.04
   0   4   2  778.26   22.46
   0   4   2  733.33   24.73
   0   4   2  731.09   24.90
   0   4   3  595.13   21.66
   0   4   3  582.82   20.36
   0   4   3  599.55   18.47
   0   4   3  627.75   22.15
   0   4   3  565.66   21.15
   0   4   4 1657.41   49.69
   0   4   4 1653.64   47.36
   0   4   4 1691.88   44.68
   0   4   4 1730.03   50.02
   0   4   5  159.96   10.78
   0   4   5  160.86    9.35
   0   4   5  184.40    8.07
   0   4   5  163.99   10.92
   0   4   5  184.37   10.83
   0   4   6   94.32    7.84
   0   4   6   87.36    8.10
   0   4   6   89.45    6.94
   0   4   6   90.75    5.36
   0   4   6   85.92    8.00
   0   4   7   86.16    8.53
   0   4   7   95.40    7.37
   0   4   7   87.57    5.46
   0   4   7   81.72    8.27
   0   4   7   90.29    8.03
   0   4   8   82.31    7.13
   0   4   8   81.64    5.22
   0   4   8   88.53    8.83
   0   4   8   81.26    7.83
   0   4   9   18.43    2.30
   0   4   9   27.25    5.02
   0   4   9   27.55    4.13
   0   4  10  339.39   16.79
   0   4  10  329.89   19.97
   0   5 -10  747.59   25.71
   0   5  -9  164.85    9.46
   0   5  -8  392.78   15.99
   0   5  -7    4.15    1.62
   0   5  -6  506.08   18.95
   0   5  -6  521.85   19.52
   0   5  -5 1591.20   42.89
   0   5  -5 1841.80   42.66
   0   5  -5 1858.38   42.60
   0   5  -5 1686.43   48.34
   0   5  -5 1704.48   48.73
   0   5  -4  951.50   24.95
   0   5  -4  882.77   28.73
   0   5  -4  937.94   25.10
   0   5  -4  970.61   29.34
   0   5  -3    4.27    1.33
   0   5  -3    6.38    1.92
   0   5  -3    4.22    1.00
   0   5  -3    4.15    1.24
   0   5  -3    3.69    0.96
   0   5  -2  512.03   16.28
   0   5  -2  513.12   17.83
   0   5  -2  505.88   19.53
   0   5  -2  489.62   16.12
   0   5  -1   28.76    3.11
   0   5  -1   21.39    2.69
   0   5  -1   25.57    3.60
   0   5  -1   21.27    3.00
   0   5  -1   24.16    3.02
   0   5   0   54.89    4.78
   0   5   0   54.99    4.96
   0   5   0   56.75    4.64
   0   5   0   50.37    4.91
   0   5   0   65.81    5.24
   0   5   1  605.99   21.71
   0   5   1  564.81   20.61
   0   5   1  562.31   20.50
   0   5   1  605.29   19.62
   0   5   1  535.12   20.46
   0   5   2    6.74    1.56
   0   5   2    1.39    1.09
   0   5   2    3.25    1.36
   0   5   2    5.22    1.66
   0   5   2    3.85    1.40
   0   5   3 1513.27   46.44
   0   5   3 1640.00   45.70
   0   5   3 1482.88   42.19
   0   5   3 1491.70   46.30
   0   5   4 1545.87   47.95
   0   5   4 1565.87   48.61
   0   5   4 1675.59   46.94
   0   5   4 1590.48   43.18
   0   5   4 1553.32   48.34
   0   5   5   64.78    7.25
   0   5   5   77.47    6.77
   0   5   5   71.75    5.17
   0   5   5   63.15    6.91
   0   5   5   73.09    7.25
   0   5   6    1.36    0.78
   0   5   6    0.02    0.86
   0   5   6    0.21    0.94
   0   5   6    1.14    0.86
   0   5   6    3.25    2.00
   0   5   7  100.86    8.35
   0   5   7  106.94    6.48
   0   5   7  101.47    9.78
   0   5   8  164.35   11.27
   0   5   8  177.35   13.56
   0   5   9   46.67    7.39
   0   5   9   34.51    5.17
   0   6 -11  529.14   21.30
   0   6 -10    1.44    1.10
   0   6  -9  418.43   17.88
   0   6  -8    7.18    2.04
   0   6  -7   75.90    6.66
   0   6  -7   88.19    7.28
   0   6  -6   52.67    2.37
   0   6  -6   52.62    5.35
   0   6  -6   44.55    4.96
   0   6  -5  931.17   25.03
   0   6  -5  954.26   25.16
   0   6  -5  908.37   30.36
   0   6  -5  912.85   30.52
   0   6  -4   48.70    3.65
   0   6  -4   47.95    5.04
   0   6  -4   51.09    3.65
   0   6  -4   42.95    4.80
   0   6  -3   94.63    5.77
   0   6  -3  106.66    7.64
   0   6  -3  100.18    6.02
   0   6  -3  110.92    7.56
   0   6  -2   86.49    5.98
   0   6  -2   94.79    6.28
   0   6  -2   93.19    6.92
   0   6  -1   82.14    6.21
   0   6  -1   81.11    6.80
   0   6  -1   90.07    6.56
   0   6  -1   78.49    6.06
   0   6   0   14.69    2.53
   0   6   0    9.21    2.28
   0   6   0   10.75    2.37
   0   6   0   15.38    2.98
   0   6   0   13.98    2.66
   0   6   1   23.70    3.20
   0   6   1   19.39    3.31
   0   6   1   21.77    3.46
   0   6   1   24.84    3.80
   0   6   1   28.22    3.93
   0   6   2  753.24   27.26
   0   6   2  678.46   25.67
   0   6   2  693.71   23.77
   0   6   2  748.07   27.22
   0   6   2  763.97   27.79
   0   6   3   23.84    3.26
   0   6   3   24.85    4.23
   0   6   3   23.84    4.12
   0   6   3   26.11    4.02
   0   6   3   23.65    4.17
   0   6   4 2140.14   61.69
   0   6   4 2028.12   58.56
   0   6   4 1983.35   54.38
   0   6   4 1997.45   60.51
   0   6   4 1966.26   60.18
   0   6   5  616.50   24.18
   0   6   5  544.83   19.82
   0   6   5  559.28   25.37
   0   6   6   15.84    2.71
   0   6   6   12.63    3.56
   0   6   6   12.60    3.23
   0   6   7  163.57   11.84
   0   6   7  198.29   14.74
   0   6   8  108.02    9.67
   0   6   8  120.50   11.92
   0   7 -12  232.89   13.76
   0   7 -11  829.08   30.17
   0   7 -10   35.49    4.86
   0   7  -9  728.54   27.29
   0   7  -8    2.76    1.49
   0   7  -7  263.67   13.90
   0   7  -7  194.97   12.35
   0   7  -6 1676.62   43.03
   0   7  -6 1733.48   42.27
   0   7  -6 1714.78   42.09
   0   7  -6 1544.89   49.68
   0   7  -6 1600.37   50.00
   0   7  -5 1908.39   48.70
   0   7  -5 1858.89   48.96
   0   7  -5 1989.58   55.67
   0   7  -5 1835.35   54.71
   0   7  -4  374.01   14.08
   0   7  -4  391.00   14.49
   0   7  -4  390.95   17.73
   0   7  -4  400.31   17.59
   0   7  -3  395.68   15.32
   0   7  -3  402.74   15.64
   0   7  -3  423.72   18.48
   0   7  -3  380.08   17.16
   0   7  -2   22.73    3.59
   0   7  -2   24.38    3.34
   0   7  -2   22.30    3.73
   0   7  -2   23.11    3.40
   0   7  -1   29.51    4.00
   0   7  -1   19.49    3.24
   0   7  -1   26.43    4.20
   0   7  -1   25.29    3.66
   0   7   0  881.30   30.20
   0   7   0  871.33   30.22
   0   7   0  861.12   30.94
   0   7   0  869.35   29.14
   0   7   1   43.83    5.38
   0   7   1   42.50    5.49
   0   7   1   43.34    5.45
   0   7   1   44.29    4.82
   0   7   2  195.51   12.78
   0   7   2  189.32   12.13
   0   7   2  179.20   10.32
   0   7   2  175.42   12.00
   0   7   2  163.90   12.01
   0   7   3   65.77    7.13
   0   7   3   54.32    6.75
   0   7   3   54.02    5.34
   0   7   3   64.49    7.28
   0   7   4  332.86   17.55
   0   7   4  313.49   14.46
   0   7   4  351.57   19.15
   0   7   5   97.02    8.97
   0   7   5   75.66    6.33
   0   7   5   89.41    9.38
   0   7   6   19.79    4.54
   0   7   6   20.74    4.42
   0   8 -11   12.04    3.28
   0   8 -10   97.47    8.84
   0   8  -9  139.62   10.70
   0   8  -8   21.00    4.14
   0   8  -7  301.41   16.59
   0   8  -6  130.79   10.27
   0   8  -6  133.60    6.55
   0   8  -6  127.72    7.00
   0   8  -6  133.87    6.33
   0   8  -5 1563.72   41.98
   0   8  -5 1533.63   42.35
   0   8  -5 1582.64   48.98
   0   8  -5 1470.42   47.72
   0   8  -4 1147.13   33.92
   0   8  -4 1170.05   34.60
   0   8  -4 1137.97   39.00
   0   8  -4 1116.39   38.05
   0   8  -3  324.85   14.63
   0   8  -3  317.17   14.08
   0   8  -3  313.56   16.65
   0   8  -3  304.46   15.84
   0   8  -2  226.46   12.31
   0   8  -2  236.00   12.82
   0   8  -2  248.79   14.49
   0   8  -2  254.84   13.87
   0   8  -1  103.02    8.25
   0   8  -1   94.39    8.03
   0   8  -1  103.83    9.07
   0   8  -1   94.15    8.00
   0   8   0  414.93   20.53
   0   8   0  425.48   20.01
   0   8   0  447.68   19.20
   0   8   0  440.26   19.93
   0   8   1   98.60    9.19
   0   8   1   91.13    8.83
   0   8   1  110.06    8.51
   0   8   1   98.14    8.97
   0   8   2  180.39   12.86
   0   8   2  149.02   10.16
   0   8   2  170.83   12.59
   0   8   3  254.04   15.69
   0   8   3  210.35   12.27
   0   8   3  260.90   16.36
   0   8   4  141.18   11.69
   0   8   4  118.07   11.34
   0   9 -10   14.12    3.81
   0   9  -9   98.62    9.56
   0   9  -8   17.19    3.95
   0   9  -7   17.84    1.82
   0   9  -7   12.33    3.49
   0   9  -6    8.85    2.94
   0   9  -6    8.94    1.87
   0   9  -6   10.59    1.86
   0   9  -5   46.10    4.47
   0   9  -5   40.52    5.88
   0   9  -5   33.74    4.02
   0   9  -4    3.15    1.51
   0   9  -4    2.58    1.76
   0   9  -4    0.05    1.00
   0   9  -3  172.24   10.45
   0   9  -3  146.87   10.19
   0   9  -3  169.61   12.61
   0   9  -2   75.27    7.07
   0   9  -2   62.64    7.72
   0   9  -2   54.59    6.33
   0   9  -1  177.06   11.97
   0   9  -1  166.86   11.94
   0   9  -1  186.82   13.47
   0   9   0  126.47   10.42
   0   9   0  111.70   10.56
   0   9   1  306.93   17.98
   0   9   1  348.57   19.64
   0   9   2  169.05   13.33
   0   9   2  167.91   13.38
   0  10  -7  168.96   13.62
   0  10  -6   71.50    8.53
   0  10  -5   11.32    3.37
   0  10  -5   17.06    2.94
   0  10  -4    6.23    1.88
   0  10  -4    3.80    2.02
   0  10  -3  151.07   12.81
   0  10  -3  142.06   10.20
   0  10  -2    5.08    2.48
   1 -10   2  162.67   12.77
   1 -10   2  154.30   11.65
   1 -10   3   39.26    5.80
   1 -10   3   36.76    5.86
   1 -10   4   41.35    5.92
   1 -10   4   40.48    6.08
   1 -10   5  135.68   10.80
   1 -10   5  138.05   11.43
   1 -10   6  267.04   15.56
   1 -10   6  287.96   17.45
   1  -9  -2  130.06   11.82
   1  -9  -2  120.32    9.36
   1  -9  -1  632.36   28.48
   1  -9   0  262.80   16.45
   1  -9   0  258.58   14.43
   1  -9   1   34.09    5.59
   1  -9   1   39.96    5.35
   1  -9   1   35.41    5.18
   1  -9   2  112.82    9.81
   1  -9   2  109.84    8.76
   1  -9   2  108.87    9.03
   1  -9   3   21.71    3.98
   1  -9   3   24.47    4.31
   1  -9   3   27.78    4.25
   1  -9   4   97.83    8.70
   1  -9   4  109.61    7.89
   1  -9   4  106.89    9.28
   1  -9   5  144.37   10.26
   1  -9   5  131.73    8.29
   1  -9   5  135.39   10.69
   1  -9   6  479.25   20.43
   1  -9   6  464.40   22.00
   1  -9   7  198.98   11.59
   1  -9   7  188.36   13.34
   1  -9   8  380.26   16.66
   1  -9   8  377.50   20.16
   1  -9   9  328.54   18.90
   1  -9  10   40.17    6.32
   1  -8  -4  206.46   14.94
   1  -8  -4  162.42   10.49
   1  -8  -3  178.63   13.70
   1  -8  -3  189.47   11.28
   1  -8  -2 1125.51   40.63
   1  -8  -2 1133.64   36.32
   1  -8  -1  423.05   20.69
   1  -8  -1  421.35   17.92
   1  -8   0  357.49   18.46
   1  -8   0  367.51   17.93
   1  -8   0  358.00   16.62
   1  -8   1   54.49    6.31
   1  -8   1   39.79    5.10
   1  -8   1   51.94    5.63
   1  -8   2  691.42   26.53
   1  -8   2  727.28   26.91
   1  -8   2  668.18   24.75
   1  -8   2  709.80   25.83
   1  -8   3   42.27    5.28
   1  -8   3   39.56    5.16
   1  -8   3   38.91    4.46
   1  -8   3   35.72    4.89
   1  -8   3   36.26    6.14
   1  -8   4  133.03    9.41
   1  -8   4  127.07    9.55
   1  -8   4  133.44    8.16
   1  -8   4  129.38    9.68
   1  -8   4  127.88   11.33
   1  -8   5  239.57   13.47
   1  -8   5  227.93   10.68
   1  -8   5  219.69   13.30
   1  -8   5  238.98   15.82
   1  -8   6    1.78    1.38
   1  -8   6    1.00    0.67
   1  -8   6    0.16    0.54
   1  -8   6   -0.66    1.42
   1  -8   7  106.82    8.65
   1  -8   7  115.47    5.61
   1  -8   7  120.54    9.84
   1  -8   8   58.96    6.87
   1  -8   8   50.68    5.85
   1  -8   9   13.50    2.38
   1  -8   9   21.66    4.41
   1  -8   9   14.64    3.18
   1  -8  10   62.63    7.39
   1  -8  10   65.62    6.89
   1  -8  11  125.95   10.92
   1  -7  -6    6.78    2.78
   1  -7  -6    2.18    1.55
   1  -7  -5   61.78    7.84
   1  -7  -5   71.04    7.65
   1  -7  -5   71.27    6.14
   1  -7  -4    0.18    1.63
   1  -7  -4    1.69    1.17
   1  -7  -4    3.90    1.58
   1  -7  -3  199.27   13.26
   1  -7  -3  174.80   12.45
   1  -7  -3  176.11   12.54
   1  -7  -3  179.56   10.22
   1  -7  -2  305.11   16.61
   1  -7  -2  304.52   16.36
   1  -7  -2  303.17   16.99
   1  -7  -2  309.89   14.17
   1  -7  -1 1855.88   54.59
   1  -7  -1 1738.34   53.03
   1  -7  -1 1801.02   50.78
   1  -7  -1 1798.26   55.97
   1  -7   0  306.64   15.76
   1  -7   0  327.48   15.71
   1  -7   0  306.33   15.09
   1  -7   0  319.94   14.53
   1  -7   0  304.63   17.06
   1  -7   1  187.93   11.48
   1  -7   1  207.48   11.82
   1  -7   1  195.50   11.00
   1  -7   1  172.97   10.37
   1  -7   1  211.54   13.51
   1  -7   2  187.40   11.27
   1  -7   2  221.35   11.98
   1  -7   2  206.89   10.85
   1  -7   2  200.94   11.21
   1  -7   2  187.85   12.93
   1  -7   3  513.00   19.60
   1  -7   3  464.48   19.29
   1  -7   3  481.52   17.77
   1  -7   3  432.12   18.73
   1  -7   3  441.08   21.53
   1  -7   4  504.87   19.88
   1  -7   4  550.22   21.15
   1  -7   4  548.46   18.62
   1  -7   4  522.01   21.12
   1  -7   4  531.26   23.66
   1  -7   5  681.97   23.14
   1  -7   5  663.68   24.33
   1  -7   5  691.59   21.09
   1  -7   5  612.93   24.52
   1  -7   5  651.80   27.35
   1  -7   6  129.00    7.89
   1  -7   6  129.12    8.93
   1  -7   6  139.35    6.51
   1  -7   6  129.30    9.46
   1  -7   6  125.17   10.40
   1  -7   7   65.93    5.10
   1  -7   7   68.41    8.25
   1  -7   7   57.25    5.77
   1  -7   7   62.34    3.54
   1  -7   7   53.79    6.08
   1  -7   7   58.29    6.89
   1  -7   8  368.53   13.86
   1  -7   8  368.40   20.67
   1  -7   8  342.54   16.22
   1  -7   8  405.12   18.71
   1  -7   8  362.38   18.99
   1  -7   9   90.10    7.46
   1  -7   9   84.92    8.57
   1  -7   9  105.31    9.00
   1  -7  10    8.02    2.42
   1  -7  10   12.00    1.58
   1  -7  10    3.14    0.82
   1  -7  10    9.39    2.84
   1  -7  10   11.61    2.62
   1  -7  11  216.01   12.44
   1  -7  11  212.82   13.88
   1  -7  11  225.24   14.41
   1  -7  12  211.35   12.48
   1  -7  12  229.01   14.85
   1  -6  -8  103.38   10.35
   1  -6  -7   36.72    4.96
   1  -6  -7   36.45    5.82
   1  -6  -6   17.32    4.17
   1  -6  -6   22.33    4.13
   1  -6  -5  470.56   21.74
   1  -6  -5  465.06   20.46
   1  -6  -5  435.62   17.15
   1  -6  -4   19.70    2.86
   1  -6  -4   21.48    4.05
   1  -6  -4   23.74    4.33
   1  -6  -4   24.10    4.10
   1  -6  -3   80.74    7.55
   1  -6  -3   65.93    6.85
   1  -6  -3   70.94    7.17
   1  -6  -3   72.13    5.70
   1  -6  -2   46.35    5.46
   1  -6  -2   66.23    6.35
   1  -6  -2   53.95    6.19
   1  -6  -1    6.09    2.27
   1  -6  -1    1.46    0.72
   1  -6  -1    8.75    2.41
   1  -6  -1    2.62    1.35
   1  -6   0   26.94    3.79
   1  -6   0   30.00    4.52
   1  -6   0   18.77    2.91
   1  -6   0   19.95    3.20
   1  -6   0   28.44    3.75
   1  -6   1  644.97   23.09
   1  -6   1  693.30   25.95
   1  -6   1  612.98   22.47
   1  -6   1  693.18   22.83
   1  -6   1  585.05   21.66
   1  -6   2    5.30    1.68
   1  -6   2    7.37    1.94
   1  -6   2    1.72    0.78
   1  -6   2    8.05    1.78
   1  -6   2    4.90    1.62
   1  -6   3   11.78    2.29
   1  -6   3   12.26    2.28
   1  -6   3    9.25    2.67
   1  -6   3   14.09    2.27
   1  -6   3   12.84    2.48
   1  -6   4 1466.45   41.53
   1  -6   4 1574.56   46.95
   1  -6   4 1427.53   42.46
   1  -6   4 1464.77   43.60
   1  -6   4 1524.58   40.20
   1  -6   5   25.59    3.01
   1  -6   5   18.63    3.53
   1  -6   5   25.86    3.76
   1  -6   5   19.15    2.98
   1  -6   5   24.01    2.47
   1  -6   6  130.08    9.66
   1  -6   6  113.51    6.46
   1  -6   6  125.64    8.00
   1  -6   6  108.50    8.16
   1  -6   6  118.80    5.54
   1  -6   7    7.81    2.22
   1  -6   7    3.74    1.07
   1  -6   7    5.06    2.07
   1  -6   7    3.48    0.74
   1  -6   7    8.56    2.10
   1  -6   7    3.84    1.34
   1  -6   8 1529.46   39.69
   1  -6   8 1640.04   44.71
   1  -6   8 1597.37   46.82
   1  -6   8 1482.36   36.26
   1  -6   8 1531.18   47.15
   1  -6   9  850.86   22.75
   1  -6   9  823.07   22.60
   1  -6   9  809.24   33.21
   1  -6   9  860.10   28.04
   1  -6   9  860.24   30.40
   1  -6   9  810.12   29.88
   1  -6  10  325.00    8.89
   1  -6  10  319.41   18.95
   1  -6  10  348.38   15.25
   1  -6  10  336.10   16.50
   1  -6  10  353.45   17.36
   1  -6  11  657.88   23.84
   1  -6  11  642.28   25.16
   1  -6  11  660.09   26.48
   1  -6  12   65.77    6.17
   1  -6  12   70.62    6.85
   1  -6  12   83.20    8.29
   1  -6  13  319.90   17.73
   1  -5  -9  235.42   15.59
   1  -5  -8   79.59    8.38
   1  -5  -8   75.00    5.42
   1  -5  -8   77.14    6.28
   1  -5  -7  530.58   23.65
   1  -5  -7  522.56   20.35
   1  -5  -6  163.63   11.60
   1  -5  -6  183.16   12.57
   1  -5  -6  192.57   10.94
   1  -5  -5  250.95   14.12
   1  -5  -5  253.40   14.38
   1  -5  -5  251.33   12.99
   1  -5  -5  243.57   11.12
   1  -5  -4 1063.21   34.92
   1  -5  -4 1109.65   34.07
   1  -5  -4 1016.13   30.29
   1  -5  -3  544.49   21.69
   1  -5  -3  550.34   22.05
   1  -5  -3  559.82   19.15
   1  -5  -2  880.47   30.87
   1  -5  -2  970.86   31.97
   1  -5  -1    3.73    1.14
   1  -5  -1    4.46    1.53
   1  -5  -1    3.50    1.57
   1  -5  -1    5.24    1.61
   1  -5  -1    5.40    1.74
   1  -5   0  845.47   26.34
   1  -5   0  775.42   27.34
   1  -5   0  790.65   25.37
   1  -5   0  789.84   25.50
   1  -5   0  752.95   24.27
   1  -5   1  122.06    8.47
   1  -5   1  114.56    7.18
   1  -5   1  115.80    7.04
   1  -5   1  121.77    7.17
   1  -5   2 1388.29   40.20
   1  -5   2 1541.48   44.06
   1  -5   2 1504.25   40.99
   1  -5   2 1405.29   40.48
   1  -5   2 1485.65   39.85
   1  -5   3 1686.63   45.50
   1  -5   3 1672.38   49.22
   1  -5   3 1776.61   46.67
   1  -5   3 1652.91   46.76
   1  -5   3 1725.78   44.69
   1  -5   4 1502.63   40.61
   1  -5   4 1611.71   45.75
   1  -5   4 1502.26   41.97
   1  -5   4 1596.02   43.40
   1  -5   4 1475.22   39.45
   1  -5   5   24.96    2.54
   1  -5   5   22.59    3.57
   1  -5   5   26.23    3.10
   1  -5   5   26.82    3.56
   1  -5   5   29.93    2.51
   1  -5   6   63.92    3.97
   1  -5   6   50.30    5.39
   1  -5   6   61.91    4.99
   1  -5   6   56.62    5.36
   1  -5   6   58.10    3.35
   1  -5   7   66.20    3.78
   1  -5   7   51.75    5.47
   1  -5   7   67.61    6.92
   1  -5   7   60.41    4.98
   1  -5   7   52.26    5.33
   1  -5   7   61.96    3.22
   1  -5   8  212.34    7.29
   1  -5   8  212.74    7.05
   1  -5   8  212.85    7.24
   1  -5   8  216.88   13.56
   1  -5   8  218.62   10.43
   1  -5   8  209.83   11.62
   1  -5   8  204.55   11.51
   1  -5   9  764.13   19.21
   1  -5   9  765.38   30.17
   1  -5   9  767.81   25.01
   1  -5   9  773.75   20.12
   1  -5   9  754.78   27.27
   1  -5   9  772.13   26.89
   1  -5   9  781.66   20.11
   1  -5  10  673.82   17.73
   1  -5  10  642.00   27.63
   1  -5  10  647.72   22.45
   1  -5  10  645.63   23.79
   1  -5  10  679.82   25.38
   1  -5  10  652.74   17.67
   1  -5  11   66.98    3.42
   1  -5  11   68.71    7.88
   1  -5  11   69.78    5.75
   1  -5  11   64.94    5.90
   1  -5  11   63.31    6.62
   1  -5  11   67.23    3.44
   1  -5  12  108.32   10.26
   1  -5  12  116.10    7.80
   1  -5  12  126.35    8.22
   1  -5  12  129.07    9.82
   1  -5  12  129.20    5.28
   1  -5  13   89.18    8.36
   1  -4 -10   57.45    7.15
   1  -4  -9    1.51    1.64
   1  -4  -9    2.12    1.17
   1  -4  -9    0.28    0.52
   1  -4  -8   11.35    2.78
   1  -4  -8    9.01    1.74
   1  -4  -8    8.43    1.83
   1  -4  -7  162.89   11.04
   1  -4  -7  157.20    8.66
   1  -4  -7  157.97   11.30
   1  -4  -6 1190.57   39.19
   1  -4  -6 1239.41   40.27
   1  -4  -6 1265.02   36.33
   1  -4  -5  402.47   17.78
   1  -4  -5  387.62   17.73
   1  -4  -5  430.08   16.48
   1  -4  -5  415.72   14.89
   1  -4  -4 1395.56   38.97
   1  -4  -4 1252.60   39.43
   1  -4  -4 1336.56   40.30
   1  -4  -4 1289.57   36.06
   1  -4  -3  474.90   17.26
   1  -4  -3  473.89   17.86
   1  -4  -3  468.61   15.09
   1  -4  -2   17.65    2.86
   1  -4  -2   16.15    2.67
   1  -4  -2   15.43    2.54
   1  -4  -2   11.95    1.84
   1  -4  -1  229.26   10.64
   1  -4  -1  246.21   11.52
   1  -4  -1  234.87   10.73
   1  -4  -1  212.01    9.24
   1  -4   0  905.01   26.87
   1  -4   0  879.70   28.08
   1  -4   0  879.15   26.61
   1  -4   0  825.46   25.51
   1  -4   1  603.88   19.55
   1  -4   1  616.48   21.44
   1  -4   1  623.11   19.71
   1  -4   1  610.42   19.39
   1  -4   1  634.42   19.46
   1  -4   2 2675.92   68.44
   1  -4   2 2700.47   71.48
   1  -4   2 2793.72   69.08
   1  -4   2 2752.10   69.35
   1  -4   2 2783.25   68.20
   1  -4   3  763.10   22.11
   1  -4   3  757.23   25.08
   1  -4   3  827.68   23.44
   1  -4   3  751.34   23.81
   1  -4   3  768.25   21.74
   1  -4   4  954.34   25.51
   1  -4   4  937.34   29.27
   1  -4   4  948.54   27.07
   1  -4   4  914.98   27.94
   1  -4   4  937.49   25.10
   1  -4   5  612.28   17.08
   1  -4   5  589.91   16.94
   1  -4   5  618.29   21.23
   1  -4   5  599.55   19.05
   1  -4   5  616.25   20.52
   1  -4   6   87.50    4.01
   1  -4   6   95.77    6.75
   1  -4   6   98.97    4.47
   1  -4   6   91.55    5.57
   1  -4   6   92.31    6.40
   1  -4   7  419.15   16.51
   1  -4   7  434.15   12.92
   1  -4   7  428.37   18.75
   1  -4   7  430.46   11.70
   1  -4   7  403.86   14.83
   1  -4   7  413.10   16.50
   1  -4   7  429.41   11.72
   1  -4   8   58.52    2.23
   1  -4   8   59.91    2.24
   1  -4   8   59.26    3.58
   1  -4   8   66.73    4.90
   1  -4   8   62.12    3.62
   1  -4   8   62.79    5.60
   1  -4   8   64.01    6.57
   1  -4   8   58.22    5.15
   1  -4   9  530.69   16.46
   1  -4   9  507.96   22.06
   1  -4   9  539.34   16.16
   1  -4   9  504.64   17.94
   1  -4   9  533.86   16.16
   1  -4   9  537.44   20.44
   1  -4   9  531.37   18.93
   1  -4  10  159.92    7.72
   1  -4  10  166.26   11.49
   1  -4  10  166.12    8.79
   1  -4  10  168.37    9.02
   1  -4  10  173.43   10.45
   1  -4  10  176.32    7.72
   1  -4  11    7.05    2.20
   1  -4  11    6.86    2.53
   1  -4  11    7.80    1.59
   1  -4  11    9.73    1.95
   1  -4  11   10.91    2.08
   1  -4  11    9.75    1.90
   1  -4  12  160.94    8.38
   1  -4  12  155.99   11.74
   1  -4  12  151.64    7.21
   1  -4  12  167.09    9.12
   1  -4  12  167.18   10.72
   1  -4  12  164.83    8.17
   1  -4  13   47.76    6.29
   1  -4  13   59.55    6.31
   1  -4  13   50.84    4.49
   1  -3 -11   59.36    7.03
   1  -3 -10   46.81    4.13
   1  -3 -10   39.35    5.43
   1  -3  -9  443.19   19.50
   1  -3  -9  408.72   11.36
   1  -3  -9  444.96   15.45
   1  -3  -9  398.66   19.80
   1  -3  -8   24.14    3.78
   1  -3  -8   20.88    2.66
   1  -3  -8   24.64    4.19
   1  -3  -8   23.16    2.45
   1  -3  -7  739.60   27.24
   1  -3  -7  798.27   23.81
   1  -3  -7  777.27   23.17
   1  -3  -7  805.90   28.63
   1  -3  -6  184.70   11.06
   1  -3  -6  183.21    8.76
   1  -3  -5  251.65   10.71
   1  -3  -5  244.36   12.07
   1  -3  -5  263.85   12.80
   1  -3  -4  143.31    8.47
   1  -3  -4  148.56    7.65
   1  -3  -4  140.57    6.83
   1  -3  -4  155.53    8.92
   1  -3  -3 1584.08   43.52
   1  -3  -3 1560.92   42.45
   1  -3  -3 1582.82   43.96
   1  -3  -3 1565.57   40.87
   1  -3  -2   45.86    3.92
   1  -3  -2   55.91    4.46
   1  -3  -2   50.72    4.32
   1  -3  -2   43.90    3.29
   1  -3  -1 1369.36   36.69
   1  -3  -1 1325.26   36.98
   1  -3  -1 1391.71   36.97
   1  -3  -1 1314.32   35.13
   1  -3   0  182.00    7.98
   1  -3   0  182.58    7.86
   1  -3   0  181.21    7.57
   1  -3   0  177.99    7.97
   1  -3   1  209.68    8.30
   1  -3   1  193.91    9.01
   1  -3   1  211.57    8.33
   1  -3   1  209.04    8.16
   1  -3   2  791.35   21.62
   1  -3   2  754.71   21.42
   1  -3   2  840.99   22.38
   1  -3   2  784.99   23.85
   1  -3   2  770.88   22.62
   1  -3   3 2637.85   62.97
   1  -3   3 2701.33   63.41
   1  -3   3 2541.74   64.18
   1  -3   3 2713.81   66.64
   1  -3   3 2484.27   65.14
   1  -3   4   10.96    1.11
   1  -3   4    6.90    1.48
   1  -3   4   11.58    1.28
   1  -3   4   12.00    1.60
   1  -3   4   10.90    1.83
   1  -3   5   42.72    2.92
   1  -3   5   40.72    2.65
   1  -3   5   48.12    4.00
   1  -3   5   41.01    3.10
   1  -3   5   42.36    3.74
   1  -3   5   45.39    2.13
   1  -3   6 1186.33   28.33
   1  -3   6 1218.90   31.41
   1  -3   6 1171.59   33.21
   1  -3   6 1276.55   36.45
   1  -3   6 1210.28   31.92
   1  -3   6 1115.18   33.38
   1  -3   6 1173.38   28.34
   1  -3   7  114.51    6.52
   1  -3   7  101.88    5.46
   1  -3   7  113.09    7.91
   1  -3   7  115.88    5.90
   1  -3   7  100.95    6.49
   1  -3   8  234.61    9.70
   1  -3   8  263.18   13.01
   1  -3   8  220.30    9.46
   1  -3   8  235.12    9.30
   1  -3   8  228.21   10.85
   1  -3   8  227.14    9.82
   1  -3   9 1462.88   38.81
   1  -3   9 1400.97   42.60
   1  -3   9 1410.46   37.99
   1  -3   9 1377.38   37.25
   1  -3   9 1332.04   39.88
   1  -3   9 1346.61   37.48
   1  -3  10 1448.78   41.26
   1  -3  10 1468.60   45.01
   1  -3  10 1473.02   40.40
   1  -3  10 1475.69   38.47
   1  -3  10 1496.31   42.95
   1  -3  10 1475.92   40.61
   1  -3  11  190.42    6.42
   1  -3  11  197.48   11.92
   1  -3  11  200.07   10.45
   1  -3  11  204.52    9.59
   1  -3  11  183.96    6.13
   1  -3  11  197.83   10.88
   1  -3  11  204.23    9.98
   1  -3  12   42.68    4.91
   1  -3  12   34.75    4.88
   1  -3  12   44.31    4.24
   1  -3  12   40.79    4.27
   1  -3  12   41.09    4.68
   1  -3  13  221.81   13.26
   1  -3  13  252.28   13.29
   1  -3  13  249.24   12.40
   1  -3  14   17.19    3.39
   1  -2 -12  122.34   10.00
   1  -2 -11    8.76    2.55
   1  -2 -11    9.44    2.03
   1  -2 -10   38.65    5.04
   1  -2 -10   29.02    3.50
   1  -2  -9   70.61    6.66
   1  -2  -9   68.68    5.35
   1  -2  -9   69.50    6.93
   1  -2  -8  850.79   25.07
   1  -2  -8  854.97   20.20
   1  -2  -8  840.69   28.74
   1  -2  -8  856.99   28.08
   1  -2  -7 4356.70  110.65
   1  -2  -7 4327.86  107.17
   1  -2  -7 4401.90  104.33
   1  -2  -7 4458.26  111.69
   1  -2  -6  568.04   20.38
   1  -2  -6  568.76   18.28
   1  -2  -6  624.51   21.50
   1  -2  -6  559.98   16.93
   1  -2  -5  242.17   11.43
   1  -2  -5  259.67    9.39
   1  -2  -4   24.33    2.84
   1  -2  -4   22.08    2.26
   1  -2  -4   27.35    3.12
   1  -2  -3  208.82    8.95
   1  -2  -3  197.99    7.98
   1  -2  -3  190.88    8.94
   1  -2  -3  189.59    7.51
   1  -2  -2    2.16    0.57
   1  -2  -2    2.66    0.71
   1  -2  -2    2.55    0.82
   1  -2  -1  220.34    8.14
   1  -2  -1  208.91    8.19
   1  -2   0 3917.35   93.82
   1  -2   1  341.25   10.27
   1  -2   1  352.39   10.56
   1  -2   1  371.82   11.01
   1  -2   3 3808.59   90.43
   1  -2   3 3758.15   91.03
   1  -2   4  121.66    5.45
   1  -2   4  122.34    5.00
   1  -2   4  122.08    5.83
   1  -2   5   40.01    3.08
   1  -2   5   47.97    4.06
   1  -2   5   44.01    2.83
   1  -2   5   47.92    3.30
   1  -2   5   42.95    3.38
   1  -2   6 2765.44   66.90
   1  -2   6 2670.04   69.01
   1  -2   6 2703.27   66.00
   1  -2   6 2657.24   65.35
   1  -2   6 2587.46   66.89
   1  -2   7  183.01    7.41
   1  -2   7  187.85    8.62
   1  -2   7  190.21    7.65
   1  -2   7  180.31    9.45
   1  -2   7  181.00    8.10
   1  -2   7  184.95    8.52
   1  -2   7  181.22    5.70
   1  -2   8  401.85   11.42
   1  -2   8  402.08   14.97
   1  -2   8  415.19   16.27
   1  -2   8  399.11   13.54
   1  -2   8  394.66   14.65
   1  -2   8  389.78   14.35
   1  -2   8  403.07   12.37
   1  -2   9  270.07   11.89
   1  -2   9  255.77    7.72
   1  -2   9  234.72    9.96
   1  -2   9  242.97    7.33
   1  -2   9  240.75   10.96
   1  -2   9  242.50   10.97
   1  -2   9  245.93    8.27
   1  -2  10    4.78    1.56
   1  -2  10    1.86    0.70
   1  -2  10    1.01    0.91
   1  -2  10    1.86    1.00
   1  -2  10    3.17    1.41
   1  -2  10    2.07    0.79
   1  -2  11  505.55   19.73
   1  -2  11  521.95   20.53
   1  -2  11  547.86   18.26
   1  -2  11  517.32   19.13
   1  -2  11  510.07   19.71
   1  -2  11  498.17   15.51
   1  -2  12  250.69   12.81
   1  -2  12  265.80   14.13
   1  -2  12  278.99   11.95
   1  -2  12  274.02   12.86
   1  -2  12  272.01   13.64
   1  -2  12  258.76    9.60
   1  -2  13   62.95    6.70
   1  -2  13   62.63    5.76
   1  -2  13   68.49    6.67
   1  -1 -13  157.84   11.38
   1  -1 -12  271.29   14.77
   1  -1 -11  227.61   11.61
   1  -1 -11  230.44   12.92
   1  -1 -10  115.20    8.44
   1  -1 -10  118.64    7.74
   1  -1  -9  528.74   20.29
   1  -1  -9  539.12   19.21
   1  -1  -9  500.98   20.60
   1  -1  -8   85.08    6.46
   1  -1  -8   87.78    6.00
   1  -1  -8   83.40    6.63
   1  -1  -7  119.42    7.39
   1  -1  -7  121.87    6.91
   1  -1  -7  106.02    7.27
   1  -1  -6 2008.84   51.21
   1  -1  -6 2040.11   49.88
   1  -1  -6 2084.43   45.71
   1  -1  -6 2009.15   51.62
   1  -1  -5 1085.55   30.56
   1  -1  -5 1165.93   28.59
   1  -1  -5 1102.92   32.18
   1  -1  -4 1285.12   34.92
   1  -1  -4 1295.06   35.24
   1  -1  -3  647.48   19.02
   1  -1  -3  642.55   19.24
   1  -1  -2   43.73    2.98
   1  -1  -2   42.26    3.00
   1  -1  -2   43.32    2.62
   1  -1  -1 1948.98   49.07
   1  -1  -1 1983.20   49.85
   1  -1   0    1.97    0.54
   1  -1   0    2.62    0.52
   1  -1   1  387.91   10.00
   1  -1   1  392.02   11.47
   1  -1   1  369.12   10.74
   1  -1   1  389.32   10.13
   1  -1   1  367.86   10.59
   1  -1   3  388.66   12.41
   1  -1   3  413.05   10.72
   1  -1   3  412.35   11.87
   1  -1   4 4530.08  108.54
   1  -1   5   24.36    2.51
   1  -1   5   20.33    2.35
   1  -1   5   21.92    1.74
   1  -1   5   24.26    2.13
   1  -1   6   11.40    1.58
   1  -1   6   16.16    1.64
   1  -1   6   16.26    2.18
   1  -1   6   14.76    2.02
   1  -1   6   13.13    1.26
   1  -1   6   15.68    2.22
   1  -1   6   11.48    1.09
   1  -1   6   13.69    1.39
   1  -1   7  388.92   13.83
   1  -1   7  397.89   14.77
   1  -1   7  387.41   12.26
   1  -1   7  368.07   11.63
   1  -1   7  384.26   12.94
   1  -1   7  370.37   13.98
   1  -1   7  360.17    9.98
   1  -1   7  383.11    9.91
   1  -1   8  311.10   12.37
   1  -1   8  312.29   13.45
   1  -1   8  311.61   11.05
   1  -1   8  311.22   11.52
   1  -1   8  281.90   12.57
   1  -1   8  305.46   10.52
   1  -1   9  697.78   22.55
   1  -1   9  688.03   24.64
   1  -1   9  716.84   21.49
   1  -1   9  712.36   22.01
   1  -1   9  731.68   24.45
   1  -1   9  728.25   21.13
   1  -1  10   33.56    3.58
   1  -1  10   34.17    3.33
   1  -1  10   33.90    4.22
   1  -1  10   33.92    4.42
   1  -1  10   32.76    3.42
   1  -1  10   32.69    3.16
   1  -1  11   99.53    8.31
   1  -1  11   89.63    6.01
   1  -1  11  106.87    6.60
   1  -1  11  106.97    8.20
   1  -1  11   96.08    5.97
   1  -1  12  111.00    9.40
   1  -1  12  120.16    7.39
   1  -1  12  136.13    7.83
   1  -1  12  137.31    9.84
   1  -1  12  112.00    6.88
   1  -1  13  251.81   15.35
   1  -1  13  253.20   11.89
   1  -1  13  267.79   15.13
   1   0 -13   95.06    8.00
   1   0 -12  637.33   24.14
   1   0 -11  189.36   10.86
   1   0 -11  188.42   10.98
   1   0 -10  374.38   15.76
   1   0 -10  361.39   15.86
   1   0  -9  324.17   14.41
   1   0  -9  353.28   14.56
   1   0  -8  485.53   17.91
   1   0  -8  484.23   17.50
   1   0  -8  474.79   17.64
   1   0  -7 1747.78   47.22
   1   0  -7 1741.70   47.65
   1   0  -7 1804.00   47.65
   1   0  -6 1694.89   46.03
   1   0  -6 1682.64   46.44
   1   0  -5  746.78   22.55
   1   0  -5  777.75   19.59
   1   0  -5  795.42   23.20
   1   0  -5  830.89   23.02
   1   0  -4  495.96   15.49
   1   0  -4  531.23   15.96
   1   0  -4  507.89   15.51
   1   0  -4  509.12   13.43
   1   0  -3 3872.21   92.69
   1   0  -2    0.74    0.39
   1   0  -2    0.90    0.40
   1   0  -2    1.31    0.38
   1   0   0 1611.74   30.65
   1   0   0 1004.61   28.97
   1   0   1  741.84   20.23
   1   0   1  784.88   19.39
   1   0   1  751.36   18.38
   1   0   2  769.08   21.41
   1   0   2  801.78   19.16
   1   0   2  806.51   20.03
   1   0   3  494.92   13.39
   1   0   3  503.89   12.84
   1   0   3  489.85   13.18
   1   0   3  485.83   13.52
   1   0   4  219.38    6.61
   1   0   4  217.02    7.42
   1   0   4  215.14    7.21
   1   0   4  218.32    9.07
   1   0   4  222.76    8.83
   1   0   4  222.72    6.78
   1   0   5  218.51    7.49
   1   0   5  214.25    6.30
   1   0   5  199.88    9.34
   1   0   5  212.50    7.12
   1   0   5  207.17    9.12
   1   0   5  210.65    7.75
   1   0   6 1357.30   34.72
   1   0   6 1380.21   38.75
   1   0   6 1376.99   34.45
   1   0   6 1314.16   37.70
   1   0   6 1346.42   35.49
   1   0   7    6.22    1.14
   1   0   7    7.49    1.46
   1   0   7    9.24    1.34
   1   0   7    6.91    1.69
   1   0   7    8.47    1.83
   1   0   8  450.28   15.04
   1   0   8  464.06   18.60
   1   0   8  467.37   14.73
   1   0   8  469.51   18.17
   1   0   8  463.82   15.75
   1   0   9   21.14    2.76
   1   0   9   29.99    2.98
   1   0   9   28.65    4.09
   1   0   9   23.76    3.71
   1   0   9   20.96    2.35
   1   0  10   77.06    5.35
   1   0  10   79.54    7.42
   1   0  10   78.31    4.98
   1   0  10   75.58    7.04
   1   0  10   62.89    5.16
   1   0  11   71.54    7.52
   1   0  11   72.94    5.56
   1   0  11   81.29    5.63
   1   0  11   82.16    6.25
   1   0  11   81.25    5.24
   1   0  11   89.96    8.03
   1   0  11   77.54    5.00
   1   0  12  178.24   12.89
   1   0  12  182.09    9.63
   1   0  12  189.40    9.43
   1   0  12  177.26    8.65
   1   0  12  180.04   12.42
   1   0  12  188.56   10.25
   1   0  13  538.62   24.58
   1   1 -11   85.43    6.49
   1   1 -10  172.02    9.27
   1   1 -10  166.99   10.31
   1   1  -9    3.30    1.24
   1   1  -9    4.89    1.64
   1   1  -8    3.51    1.36
   1   1  -8    2.79    0.97
   1   1  -7   28.62    3.58
   1   1  -7   29.64    1.69
   1   1  -7   28.60    2.83
   1   1  -7   24.30    2.71
   1   1  -6  138.41    6.62
   1   1  -6  133.89    7.67
   1   1  -6  139.42    6.33
   1   1  -6  139.44    5.12
   1   1  -5 5235.58  126.99
   1   1  -4 1658.38   41.08
   1   1  -4 1613.14   40.85
   1   1  -3 1213.72   33.05
   1   1  -3 1234.58   31.98
   1   1  -3 1264.90   31.47
   1   1  -3 1292.81   30.48
   1   1  -2 1759.07   43.20
   1   1  -2 1740.98   44.00
   1   1  -2 1758.83   43.20
   1   1  -1 1056.70   26.95
   1   1  -1 1006.77   26.80
   1   1  -1 1007.62   26.41
   1   1   0  741.22   19.37
   1   1   0  722.84   20.05
   1   1   0  729.02   19.31
   1   1   1  745.40   18.25
   1   1   1  700.64   20.29
   1   1   1  764.93   19.97
   1   1   1  748.47   18.96
   1   1   2 2149.00   53.80
   1   1   2 2197.12   52.20
   1   1   2 2206.91   51.38
   1   1   2 2121.00   52.52
   1   1   3 1970.82   52.95
   1   1   3 1922.78   49.99
   1   1   3 2036.26   50.51
   1   1   3 2189.47   52.97
   1   1   3 2118.23   51.71
   1   1   4 4671.04  111.96
   1   1   4 4665.75  114.10
   1   1   4 4570.51  113.39
   1   1   5  351.34   10.47
   1   1   5  379.29   14.63
   1   1   5  350.32   11.35
   1   1   5  337.45   13.65
   1   1   5  354.65    9.71
   1   1   5  344.78   12.52
   1   1   6  589.79   20.99
   1   1   6  587.52   15.16
   1   1   6  565.98   17.19
   1   1   6  571.33   15.63
   1   1   6  561.72   20.27
   1   1   6  565.82   15.37
   1   1   6  600.21   18.92
   1   1   7  202.76   11.11
   1   1   7  174.43    7.74
   1   1   7  179.13    6.62
   1   1   7  166.62    9.93
   1   1   7  186.65    6.48
   1   1   7  176.32    8.83
   1   1   8 2696.70   72.44
   1   1   8 2884.42   76.77
   1   1   8 2899.68   70.80
   1   1   8 2789.39   68.42
   1   1   8 2868.81   76.00
   1   1   8 2811.32   68.02
   1   1   9   11.92    1.66
   1   1   9   11.50    1.50
   1   1   9   11.72    2.34
   1   1   9   12.66    2.86
   1   1   9   12.08    2.82
   1   1   9   11.23    1.92
   1   1  10   47.93    4.27
   1   1  10   49.59    6.28
   1   1  10   50.84    3.52
   1   1  10   57.04    6.45
   1   1  10   47.69    3.27
   1   1  10   49.88    5.12
   1   1  11   39.86    4.83
   1   1  11   42.76    4.39
   1   1  11   49.87    6.35
   1   1  11   46.03    4.40
   1   1  11   40.37    6.08
   1   1  11   45.70    3.38
   1   1  11   42.54    3.10
   1   1  12  121.05    7.69
   1   1  12  122.97   10.73
   1   2  -9 1189.09   37.74
   1   2  -7   41.47    4.55
   1   2  -7   38.74    2.91
   1   2  -6   93.28    4.92
   1   2  -6   92.40    6.56
   1   2  -5  373.20   14.67
   1   2  -5  374.95   13.04
   1   2  -5  376.57   10.28
   1   2  -5  364.69   12.39
   1   2  -4  167.05    8.27
   1   2  -4  165.09    7.20
   1   2  -4  162.82    7.07
   1   2  -3  656.34   20.39
   1   2  -3  672.95   19.18
   1   2  -3  638.92   19.15
   1   2  -2  887.22   20.69
   1   2  -2  870.96   23.48
   1   2  -2  850.58   23.01
   1   2  -1  125.83    5.73
   1   2  -1  121.58    4.95
   1   2  -1  115.61    5.29
   1   2  -1  125.72    5.12
   1   2  -1  118.67    5.84
   1   2   0 1283.89   32.74
   1   2   0 1248.30   32.28
   1   2   0 1249.07   31.37
   1   2   0 1259.52   32.24
   1   2   0 1249.82   33.36
   1   2   1  767.66   22.93
   1   2   1  812.52   20.52
   1   2   1  784.03   22.61
   1   2   1  779.21   22.77
   1   2   2 1893.39   48.99
   1   2   2 1850.11   48.43
   1   2   2 1924.79   44.82
   1   2   2 1936.23   47.81
   1   2   2 1979.97   48.45
   1   2   3   80.96    5.68
   1   2   3   86.91    4.60
   1   2   3   75.13    5.28
   1   2   3   83.79    3.17
   1   2   3   78.89    4.63
   1   2   3   94.02    5.53
   1   2   4 6904.25  166.80
   1   2   4 7092.24  170.59
   1   2   4 7072.87  166.89
   1   2   4 6801.37  169.83
   1   2   4 6927.41  168.69
   1   2   5  204.48    8.14
   1   2   5  214.22   11.04
   1   2   5  222.98    8.96
   1   2   5  207.68   10.66
   1   2   5  206.88    6.43
   1   2   5  206.54    9.86
   1   2   6 2018.13   54.32
   1   2   6 1796.52   48.66
   1   2   6 1994.84   53.64
   1   2   6 1836.18   45.20
   1   2   6 1958.45   51.45
   1   2   7  205.95   12.22
   1   2   7  186.35    8.99
   1   2   7  196.82   11.60
   1   2   7  209.35    6.79
   1   2   7  203.10   10.60
   1   2   8    2.28    0.67
   1   2   8    2.35    0.63
   1   2   8    1.59    1.25
   1   2   8    1.56    1.48
   1   2   8    2.96    1.57
   1   2   8    1.63    0.83
   1   2   9  439.58   21.20
   1   2   9  453.90   16.87
   1   2   9  458.11   13.39
   1   2   9  506.66   21.90
   1   2   9  451.62   13.14
   1   2   9  438.87   18.75
   1   2  10  216.71   14.67
   1   2  10  226.30   11.05
   1   2  10  225.08    7.73
   1   2  10  219.11    7.50
   1   2  10  222.94   14.33
   1   2  10  203.87   12.24
   1   2  11    8.35    2.28
   1   2  11    9.53    2.94
   1   2  11    9.13    2.23
   1   2  12  126.34    8.50
   1   2  12  126.16   11.82
   1   3  -8 1023.33   29.20
   1   3  -7  458.76   16.45
   1   3  -7  446.11   15.55
   1   3  -6 1121.16   31.74
   1   3  -6 1109.71   31.94
   1   3  -5  765.44   23.99
   1   3  -5  807.12   23.85
   1   3  -4 1797.16   49.05
   1   3  -4 1923.60   48.73
   1   3  -3 3691.41   95.44
   1   3  -3 4189.98   96.93
   1   3  -2 2655.91   64.85
   1   3  -2 2679.65   66.97
   1   3  -2 2740.97   66.44
   1   3  -2 2668.40   64.35
   1   3  -2 2607.20   68.00
   1   3  -1   37.83    3.57
   1   3  -1   39.70    3.01
   1   3  -1   38.66    3.18
   1   3  -1   37.47    2.87
   1   3  -1   32.50    2.59
   1   3   0  111.90    5.89
   1   3   0  106.76    5.75
   1   3   0  107.60    5.08
   1   3   0  119.51    5.89
   1   3   0  111.42    6.53
   1   3   1 1495.47   42.16
   1   3   1 1529.28   41.96
   1   3   1 1593.53   39.38
   1   3   1 1494.09   41.43
   1   3   2  129.16    7.09
   1   3   2  133.31    7.56
   1   3   2  126.15    6.54
   1   3   2  121.25    5.16
   1   3   2  132.56    7.35
   1   3   2  115.89    6.91
   1   3   3   33.40    3.45
   1   3   3   34.22    3.89
   1   3   3   23.00    3.17
   1   3   3   33.27    3.16
   1   3   3   32.91    2.29
   1   3   3   31.33    3.53
   1   3   4   18.50    2.55
   1   3   4   19.73    2.92
   1   3   4   20.22    3.19
   1   3   4   23.73    2.77
   1   3   4   26.20    3.71
   1   3   4   22.62    1.84
   1   3   5   47.46    5.30
   1   3   5   53.01    4.36
   1   3   5   53.62    4.24
   1   3   5   51.31    2.86
   1   3   5   44.37    4.97
   1   3   5   52.20    5.03
   1   3   6   52.95    5.89
   1   3   6   53.99    4.59
   1   3   6   49.47    2.81
   1   3   6   48.45    5.53
   1   3   6   51.62    5.28
   1   3   7  415.58   20.09
   1   3   7  436.45   16.69
   1   3   7  453.05   12.76
   1   3   7  428.27   19.85
   1   3   7  437.79   18.66
   1   3   8   40.92    5.03
   1   3   8   46.80    6.03
   1   3   8   38.64    4.30
   1   3   8   37.55    5.61
   1   3   8   41.54    2.51
   1   3   9    0.73    0.33
   1   3   9    1.73    0.52
   1   3   9    0.54    1.12
   1   3   9    0.10    1.08
   1   3   9    1.37    0.62
   1   3  10  103.04    7.63
   1   3  10  110.45   10.29
   1   3  10  100.23    8.83
   1   3  11   40.56    6.65
   1   3  11   42.78    5.02
   1   4  -8  958.62   30.94
   1   4  -8 1077.04   31.30
   1   4  -7    3.70    1.23
   1   4  -7    3.21    1.19
   1   4  -6   11.67    2.28
   1   4  -6   14.91    2.53
   1   4  -5  674.19   23.31
   1   4  -5  728.31   23.01
   1   4  -4 2427.05   65.60
   1   4  -4 2467.88   59.43
   1   4  -4 2458.20   64.63
   1   4  -4 2409.92   58.77
   1   4  -3 2691.19   72.26
   1   4  -3 2749.77   67.37
   1   4  -3 2659.78   70.13
   1   4  -3 2810.20   66.97
   1   4  -2 2098.14   52.10
   1   4  -2 2083.20   54.23
   1   4  -2 2114.13   53.43
   1   4  -2 2090.19   51.63
   1   4  -1  616.89   19.60
   1   4  -1  639.07   20.57
   1   4  -1  645.87   19.63
   1   4  -1  611.18   19.33
   1   4   0  853.44   26.40
   1   4   0  767.38   24.13
   1   4   0  797.49   24.40
   1   4   0  790.12   22.88
   1   4   0  760.56   23.92
   1   4   1  686.67   23.24
   1   4   1  673.10   22.62
   1   4   1  665.13   21.83
   1   4   1  695.69   20.19
   1   4   1  694.19   22.51
   1   4   2   38.96    4.15
   1   4   2   40.52    4.42
   1   4   2   40.87    3.95
   1   4   2   43.33    3.21
   1   4   2   35.10    4.05
   1   4   2   42.22    4.46
   1   4   3  694.03   23.86
   1   4   3  603.00   21.60
   1   4   3  610.83   21.09
   1   4   3  647.60   18.63
   1   4   3  613.07   22.78
   1   4   3  622.76   22.50
   1   4   4  887.80   27.23
   1   4   4  829.57   27.03
   1   4   4  879.31   23.69
   1   4   4  855.04   29.36
   1   4   4  886.81   29.10
   1   4   5   93.44    8.15
   1   4   5   95.69    6.72
   1   4   5   82.15    4.46
   1   4   5   99.67    7.75
   1   4   6  395.60   19.21
   1   4   6  383.61   15.81
   1   4   6  375.15   11.92
   1   4   6  347.22   17.84
   1   4   6  379.35   17.59
   1   4   7  545.47   24.98
   1   4   7  567.45   21.15
   1   4   7  565.46   16.08
   1   4   7  540.49   24.33
   1   4   7  559.84   23.28
   1   4   8  139.83    9.20
   1   4   8  145.72    5.51
   1   4   8  142.02   11.62
   1   4   8  139.68   10.60
   1   4   9   84.43    7.19
   1   4   9   97.20    9.89
   1   4  10  681.81   25.79
   1   4  10  698.74   31.22
   1   5 -10   86.88    7.18
   1   5  -9   69.06    6.15
   1   5  -8   32.16    3.99
   1   5  -8   27.71    3.85
   1   5  -7 1660.77   46.37
   1   5  -7 1555.56   46.69
   1   5  -6   10.35    2.39
   1   5  -6   11.16    2.26
   1   5  -5   88.51    2.99
   1   5  -5   88.75    3.47
   1   5  -5   78.80    6.70
   1   5  -4    3.79    1.43
   1   5  -4    2.86    1.39
   1   5  -4    2.50    0.62
   1   5  -4    6.52    1.83
   1   5  -4    2.26    0.74
   1   5  -3  358.66   16.16
   1   5  -3  377.56   12.72
   1   5  -3  361.45   14.97
   1   5  -3  379.13   14.73
   1   5  -3  352.22   12.09
   1   5  -2   93.12    7.27
   1   5  -2   77.06    5.20
   1   5  -2   78.50    6.08
   1   5  -2   81.64    5.79
   1   5  -2   83.63    5.15
   1   5  -1  132.74    9.03
   1   5  -1  126.30    7.41
   1   5  -1  126.76    7.92
   1   5  -1  130.14    7.33
   1   5   0  641.99   24.04
   1   5   0  667.29   22.62
   1   5   0  622.45   22.43
   1   5   0  673.19   21.17
   1   5   0  706.72   22.77
   1   5   1 1003.96   33.27
   1   5   1 1004.10   31.85
   1   5   1 1044.91   29.78
   1   5   1 1003.69   32.12
   1   5   2  325.72   15.47
   1   5   2  367.07   15.17
   1   5   2  344.27   15.74
   1   5   2  336.64   12.65
   1   5   2  352.53   15.72
   1   5   3  143.42   10.02
   1   5   3  171.01   10.52
   1   5   3  149.09    9.16
   1   5   3  148.20    9.60
   1   5   3  163.30    7.59
   1   5   3  164.04   10.54
   1   5   4  424.30   19.71
   1   5   4  417.10   17.55
   1   5   4  442.01   14.71
   1   5   4  457.60   18.52
   1   5   4  403.36   19.21
   1   5   4  442.84   19.40
   1   5   5    7.85    1.50
   1   5   5    4.24    1.78
   1   5   5    7.86    2.61
   1   5   5    8.76    2.26
   1   5   5    3.88    2.18
   1   5   6 1272.70   44.96
   1   5   6 1364.48   41.19
   1   5   6 1269.58   35.03
   1   5   6 1431.61   45.92
   1   5   6 1399.57   44.11
   1   5   7  247.28   13.73
   1   5   7  275.02    9.69
   1   5   7  281.52   17.12
   1   5   8  262.63   14.31
   1   5   8  267.31   17.31
   1   5   9  232.32   13.72
   1   5   9  255.57   17.60
   1   6 -11  148.74   10.37
   1   6 -10  416.11   18.60
   1   6  -9  225.52   12.59
   1   6  -8  294.51   14.62
   1   6  -8  299.84   15.37
   1   6  -7 1144.82   35.78
   1   6  -7 1052.69   36.15
   1   6  -6  190.29   11.11
   1   6  -6  160.89   10.96
   1   6  -5  303.75    9.74
   1   6  -5  316.54   10.39
   1   6  -5  318.71   14.94
   1   6  -5  322.61   16.15
   1   6  -5  304.41   14.37
   1   6  -4  171.30    7.42
   1   6  -4  171.19    7.83
   1   6  -4  199.36   10.93
   1   6  -4  172.61   11.28
   1   6  -4  168.41    9.92
   1   6  -3  311.30   12.35
   1   6  -3  292.19   14.18
   1   6  -3  292.09   15.51
   1   6  -3  306.24   13.78
   1   6  -3  312.96   11.94
   1   6  -2 2873.93   75.68
   1   6  -2 2911.29   80.54
   1   6  -2 2911.91   76.70
   1   6  -2 2885.07   75.18
   1   6  -1 1392.89   40.49
   1   6  -1 1364.17   41.41
   1   6  -1 1368.80   43.66
   1   6  -1 1402.31   39.87
   1   6  -1 1368.65   39.88
   1   6   0   29.49    3.50
   1   6   0   37.81    4.52
   1   6   0   29.62    3.98
   1   6   0   32.10    4.20
   1   6   0   30.48    4.60
   1   6   1  101.43    7.96
   1   6   1   92.99    7.48
   1   6   1  109.21    8.74
   1   6   1   88.40    6.18
   1   6   1   92.78    7.50
   1   6   2  434.35   20.05
   1   6   2  507.30   20.25
   1   6   2  474.36   17.05
   1   6   2  484.93   20.83
   1   6   2  477.32   20.40
   1   6   3   26.98    3.08
   1   6   3   19.10    3.71
   1   6   3   24.46    3.89
   1   6   3   19.87    3.86
   1   6   4   71.46    7.94
   1   6   4   90.02    7.63
   1   6   4   88.18    5.77
   1   6   4   99.91    9.04
   1   6   5   14.16    2.12
   1   6   5   14.85    3.70
   1   6   5   14.52    3.15
   1   6   6   10.94    1.87
   1   6   6   10.91    3.11
   1   6   6   13.09    3.12
   1   6   7  204.41   13.02
   1   6   7  212.57   15.63
   1   6   8   92.57    8.71
   1   6   8   91.63   10.49
   1   7 -12   67.67    7.24
   1   7 -11   60.58    6.78
   1   7 -10  728.25   27.95
   1   7  -9   31.88    4.74
   1   7  -8  457.90   20.33
   1   7  -7  138.71   10.28
   1   7  -7  170.33   11.96
   1   7  -6  328.93   10.19
   1   7  -6  332.82    9.50
   1   7  -6  316.41   16.32
   1   7  -6  302.11   17.01
   1   7  -5   34.25    4.48
   1   7  -5   33.20    2.82
   1   7  -5   35.51    3.22
   1   7  -5   30.60    4.57
   1   7  -5   37.06    5.53
   1   7  -4   52.88    4.22
   1   7  -4   54.54    4.58
   1   7  -4   60.36    6.19
   1   7  -4   71.03    6.45
   1   7  -4   67.19    7.32
   1   7  -3   64.47    5.42
   1   7  -3   50.90    6.46
   1   7  -3   66.90    6.72
   1   7  -3   65.28    6.19
   1   7  -3   58.71    4.93
   1   7  -2   49.32    5.03
   1   7  -2   53.79    6.01
   1   7  -2   49.19    6.26
   1   7  -2   47.59    5.08
   1   7  -2   46.45    4.67
   1   7  -1 2220.98   62.48
   1   7  -1 2422.98   64.87
   1   7  -1 2154.75   61.23
   1   7  -1 2295.95   66.59
   1   7  -1 2221.41   61.93
   1   7   0  241.10   13.57
   1   7   0  266.39   14.34
   1   7   0  238.15   12.16
   1   7   0  261.06   15.35
   1   7   0  242.63   13.25
   1   7   1   44.98    5.61
   1   7   1   52.89    6.12
   1   7   1   52.79    5.08
   1   7   1   49.79    5.91
   1   7   2   67.82    7.67
   1   7   2   62.42    6.80
   1   7   2   75.18    5.99
   1   7   2   72.99    7.44
   1   7   3   40.55    5.74
   1   7   3   43.20    5.64
   1   7   3   38.29    4.13
   1   7   4   60.55    6.88
   1   7   4   54.92    5.00
   1   7   4   65.60    7.91
   1   7   5   42.27    6.55
   1   7   5   47.19    6.18
   1   7   6   18.43    4.68
   1   7   6   14.68    3.42
   1   8 -11   17.94    3.81
   1   8 -10  345.95   18.27
   1   8  -9  108.44    9.47
   1   8  -8  638.58   26.62
   1   8  -7  286.20   16.31
   1   8  -6   16.70    2.10
   1   8  -6   18.54    4.00
   1   8  -6   16.59    1.86
   1   8  -5  196.67    8.90
   1   8  -5  205.52    9.78
   1   8  -5  201.68   13.25
   1   8  -5  214.11   12.94
   1   8  -4   43.04    5.34
   1   8  -4   46.49    4.39
   1   8  -4   38.47    4.27
   1   8  -4   44.07    5.81
   1   8  -3   37.91    4.27
   1   8  -3   38.65    5.01
   1   8  -3   34.98    5.21
   1   8  -3   33.60    4.30
   1   8  -2   64.04    6.40
   1   8  -2   63.37    7.05
   1   8  -2   67.01    6.62
   1   8  -2   59.17    5.82
   1   8  -1  567.14   23.63
   1   8  -1  572.02   24.76
   1   8  -1  559.67   22.51
   1   8  -1  612.59   23.53
   1   8   0   67.61    7.41
   1   8   0   53.75    6.50
   1   8   0   52.99    5.64
   1   8   0   56.69    6.54
   1   8   1  308.20   17.69
   1   8   1  367.39   18.79
   1   8   1  320.98   15.34
   1   8   1  344.14   18.01
   1   8   2  303.73   17.19
   1   8   2  276.51   13.91
   1   8   2  311.75   17.68
   1   8   3   88.73    8.93
   1   8   3   78.71    6.69
   1   8   3   90.51    9.53
   1   8   4  102.80    9.97
   1   8   4  129.06   11.84
   1   9 -10    3.45    1.81
   1   9  -9   28.42    4.99
   1   9  -8  244.73   15.89
   1   9  -7  275.68   17.04
   1   9  -6   93.42    5.35
   1   9  -6   88.35    9.19
   1   9  -5  339.76   13.73
   1   9  -5  338.28   14.60
   1   9  -5  357.99   19.41
   1   9  -4  208.03   10.94
   1   9  -4  203.23   11.54
   1   9  -4  229.46   14.83
   1   9  -3   68.10    6.33
   1   9  -3   68.73    6.86
   1   9  -3   86.32    8.97
   1   9  -2  576.38   23.10
   1   9  -2  521.90   23.21
   1   9  -2  595.74   26.29
   1   9  -1  391.97   20.22
   1   9  -1  433.92   22.12
   1   9  -1  469.54   21.00
   1   9   0  172.78   13.20
   1   9   0  157.23   11.07
   1   9   0  192.38   13.01
   1   9   1  155.65   12.71
   1   9   1  173.54   13.03
   1   9   2   52.45    7.12
   1   9   2   37.73    6.13
   1  10  -5    7.75    3.58
   1  10  -4  262.12   13.36
   1  10  -3  133.00    9.82
   2  -9  -2  361.41   20.55
   2  -9  -2  314.40   16.87
   2  -9  -1  351.62   20.17
   2  -9  -1  352.80   17.85
   2  -9   0   20.17    3.71
   2  -9   0   18.33    4.38
   2  -9   1  297.31   17.18
   2  -9   1  278.50   15.60
   2  -9   2  398.99   19.83
   2  -9   2  350.03   17.97
   2  -9   2  386.78   18.87
   2  -9   3   23.61    4.31
   2  -9   3   25.63    4.57
   2  -9   3   26.25    4.23
   2  -9   4   97.55    8.56
   2  -9   4   95.16    7.74
   2  -9   4   91.50    8.69
   2  -9   5  188.58   11.74
   2  -9   5  164.83   10.12
   2  -9   5  177.02   12.56
   2  -9   6  124.52    9.01
   2  -9   6  118.06   10.30
   2  -9   7    4.19    1.62
   2  -9   7    2.75    1.24
   2  -9   8    3.63    2.28
   2  -9   8    2.65    1.31
   2  -9   9   43.53    6.48
   2  -8  -4   25.72    4.23
   2  -8  -4   27.09    5.44
   2  -8  -3  333.76   19.59
   2  -8  -3  392.66   17.98
   2  -8  -2   21.17    3.83
   2  -8  -2   33.54    5.57
   2  -8  -1   30.36    4.37
   2  -8  -1   29.80    4.98
   2  -8   0   60.57    6.97
   2  -8   0   52.92    6.33
   2  -8   0   62.03    6.23
   2  -8   1  424.37   19.98
   2  -8   1  460.03   19.99
   2  -8   2  282.01   14.98
   2  -8   2  281.81   14.92
   2  -8   2  230.70   13.33
   2  -8   2  242.96   13.82
   2  -8   3  267.43   14.37
   2  -8   3  293.14   15.18
   2  -8   3  268.85   13.84
   2  -8   3  267.99   14.53
   2  -8   4  191.49   11.43
   2  -8   4  202.29   12.25
   2  -8   4  211.05   11.33
   2  -8   4  201.53   12.54
   2  -8   5   10.80    2.92
   2  -8   5   17.47    3.15
   2  -8   5   14.69    2.64
   2  -8   5   14.23    3.08
   2  -8   6  537.27   19.85
   2  -8   6  486.13   21.01
   2  -8   6  513.04   18.61
   2  -8   6  532.68   22.88
   2  -8   7  145.44    8.51
   2  -8   7  144.21   10.03
   2  -8   7  144.89    7.79
   2  -8   7  172.36   11.84
   2  -8   8  258.78   11.00
   2  -8   8  228.17   13.22
   2  -8   8  232.78    9.49
   2  -8   8  255.19   15.02
   2  -8   9    0.99    0.50
   2  -8   9    0.34    0.99
   2  -8  10   85.82    7.56
   2  -8  10   83.87    8.72
   2  -8  11  163.02   12.72
   2  -7  -6    2.22    1.44
   2  -7  -6    0.36    1.49
   2  -7  -5   70.14    8.21
   2  -7  -5   55.77    7.03
   2  -7  -5   59.58    6.14
   2  -7  -4   92.07    9.22
   2  -7  -4  101.96    7.98
   2  -7  -3  464.19   22.74
   2  -7  -3  488.53   22.82
   2  -7  -3  530.75   20.63
   2  -7  -2   81.12    7.91
   2  -7  -2   75.44    8.10
   2  -7  -2   72.88    7.57
   2  -7  -2   76.92    6.74
   2  -7  -1  257.98   14.62
   2  -7  -1  229.80   15.11
   2  -7  -1  264.48   14.67
   2  -7   0  226.11   13.15
   2  -7   0  238.06   15.09
   2  -7   0  222.64   13.07
   2  -7   0  230.70   12.26
   2  -7   1  253.69   13.78
   2  -7   1  275.33   16.20
   2  -7   1  275.03   14.02
   2  -7   1  262.38   13.39
   2  -7   2  791.23   28.17
   2  -7   2  879.42   33.14
   2  -7   2  845.46   28.87
   2  -7   2  780.56   27.73
   2  -7   2  838.36   28.64
   2  -7   3  992.04   35.61
   2  -7   3  924.10   30.37
   2  -7   3  892.01   30.52
   2  -7   3  876.69   29.54
   2  -7   3  974.12   31.69
   2  -7   4  262.87   12.57
   2  -7   4  244.02   15.58
   2  -7   4  274.96   13.56
   2  -7   4  240.37   13.34
   2  -7   4  273.95   12.45
   2  -7   5  804.88   25.77
   2  -7   5  828.09   32.01
   2  -7   5  781.50   27.03
   2  -7   5  748.50   27.91
   2  -7   5  766.78   24.95
   2  -7   6  887.30   27.79
   2  -7   6  923.14   34.69
   2  -7   6  938.81   30.48
   2  -7   6  940.55   32.03
   2  -7   6  895.83   27.27
   2  -7   7  116.58    6.54
   2  -7   7  111.55   10.04
   2  -7   7  102.47    7.72
   2  -7   7  107.32    8.75
   2  -7   7  105.75    6.17
   2  -7   8  395.08   20.45
   2  -7   8  446.58   13.99
   2  -7   8  374.10   16.79
   2  -7   8  435.46   19.61
   2  -7   8  377.37   13.57
   2  -7   9   54.25    6.43
   2  -7   9   59.99    3.01
   2  -7   9   63.36    5.87
   2  -7   9   49.16    3.33
   2  -7   9   51.81    6.72
   2  -7  10  165.32   10.08
   2  -7  10  195.02   12.74
   2  -7  10  159.10   12.18
   2  -7  11   83.06    6.88
   2  -7  11   99.08    9.08
   2  -7  12  401.09   20.50
   2  -6  -8   43.09    6.69
   2  -6  -7   60.59    7.73
   2  -6  -7   52.94    6.26
   2  -6  -6  199.98   13.96
   2  -6  -6  188.42   12.34
   2  -6  -5   35.22    5.13
   2  -6  -5   50.30    6.40
   2  -6  -5   46.63    4.94
   2  -6  -4   14.70    2.76
   2  -6  -4   22.68    4.23
   2  -6  -4   13.90    3.33
   2  -6  -4   11.04    3.19
   2  -6  -3  403.70   19.19
   2  -6  -3  424.02   19.77
   2  -6  -3  436.05   19.79
   2  -6  -3  392.66   16.62
   2  -6  -2  324.52   16.22
   2  -6  -2  319.70   16.79
   2  -6  -2  318.64   16.15
   2  -6  -2  335.47   14.45
   2  -6  -1   67.08    6.51
   2  -6  -1   64.94    6.91
   2  -6  -1   65.33    6.48
   2  -6  -1   56.41    5.21
   2  -6   0  872.29   29.06
   2  -6   0  837.95   30.84
   2  -6   0  855.76   29.02
   2  -6   0  815.26   27.40
   2  -6   1  121.50    8.29
   2  -6   1  113.73    9.16
   2  -6   1  129.17    8.41
   2  -6   1  128.94    8.40
   2  -6   1  118.62    7.97
   2  -6   2  160.75    9.30
   2  -6   2  170.36   11.44
   2  -6   2  159.85    9.44
   2  -6   2  159.64    9.39
   2  -6   2  182.97    9.80
   2  -6   3  333.07   13.91
   2  -6   3  360.20   17.47
   2  -6   3  321.24   14.16
   2  -6   3  303.87   14.33
   2  -6   3  347.24   14.08
   2  -6   4   13.15    3.37
   2  -6   4    7.91    2.10
   2  -6   4    8.66    1.95
   2  -6   4    8.75    1.88
   2  -6   4   13.39    2.56
   2  -6   5  130.35    7.09
   2  -6   5  125.79    9.93
   2  -6   5  142.07    8.36
   2  -6   5  127.21    8.69
   2  -6   5  128.70    7.21
   2  -6   6 1010.16   28.74
   2  -6   6 1064.19   36.00
   2  -6   6  972.74   31.10
   2  -6   6 1069.75   33.83
   2  -6   6 1048.45   29.59
   2  -6   7 1095.59   29.25
   2  -6   7 1113.27   37.51
   2  -6   7 1092.48   32.93
   2  -6   7 1081.42   35.41
   2  -6   7 1071.10   30.26
   2  -6   8  435.22   14.41
   2  -6   8  443.78   12.24
   2  -6   8  430.14   20.00
   2  -6   8  414.86   21.40
   2  -6   8  405.27   16.45
   2  -6   8  417.93   18.73
   2  -6   9  130.51    6.36
   2  -6   9  132.34   10.18
   2  -6   9  131.98   11.40
   2  -6   9  147.27    8.50
   2  -6   9  150.34   10.28
   2  -6  10   33.55    2.82
   2  -6  10   42.89    5.61
   2  -6  10   37.84    6.47
   2  -6  10   34.58    3.94
   2  -6  10   31.69    2.69
   2  -6  10   35.98    4.94
   2  -6  11  148.22    8.81
   2  -6  11  151.60    6.36
   2  -6  11  160.19   11.11
   2  -6  11  157.84   10.97
   2  -6  12  271.48   15.48
   2  -5  -9  794.04   32.69
   2  -5  -9  766.28   26.49
   2  -5  -8  112.46    7.83
   2  -5  -8  102.41    7.73
   2  -5  -7  913.65   33.79
   2  -5  -7  850.90   29.63
   2  -5  -6  221.94   13.70
   2  -5  -6  196.13   13.45
   2  -5  -6  210.04   11.98
   2  -5  -5  267.16   14.76
   2  -5  -5  266.56   13.91
   2  -5  -5  258.67   14.85
   2  -5  -5  259.54   12.34
   2  -5  -4  685.76   26.53
   2  -5  -4  759.43   26.61
   2  -5  -4  663.07   26.47
   2  -5  -4  714.58   23.79
   2  -5  -3  301.86   14.83
   2  -5  -3  293.65   14.76
   2  -5  -3  308.79   15.24
   2  -5  -3  297.96   12.97
   2  -5  -2  227.66   11.97
   2  -5  -2  211.73   11.90
   2  -5  -2  205.44   11.69
   2  -5  -2  190.65    9.84
   2  -5  -1 1124.90   35.74
   2  -5  -1 1170.41   37.36
   2  -5  -1 1213.90   36.65
   2  -5  -1 1207.30   34.56
   2  -5   0   67.99    5.71
   2  -5   0   76.80    6.67
   2  -5   0   70.05    5.89
   2  -5   0   67.59    5.33
   2  -5   1   93.72    6.48
   2  -5   1  105.73    6.84
   2  -5   1  111.55    8.18
   2  -5   1  105.14    6.77
   2  -5   1  100.85    6.83
   2  -5   2  134.14    7.58
   2  -5   2  140.31    7.92
   2  -5   2  145.05    9.51
   2  -5   2  151.15    8.45
   2  -5   2  146.63    8.12
   2  -5   3  878.17   25.31
   2  -5   3  821.76   25.69
   2  -5   3  877.04   29.26
   2  -5   3  789.39   26.28
   2  -5   3  810.14   25.32
   2  -5   4  125.63    6.43
   2  -5   4  142.61    9.45
   2  -5   4  123.94    7.20
   2  -5   4  120.20    7.73
   2  -5   4  122.55    6.79
   2  -5   5  177.35    8.13
   2  -5   5  173.55    7.35
   2  -5   5  160.36   10.37
   2  -5   5  165.79    8.47
   2  -5   5  186.97   10.03
   2  -5   6  505.76   14.83
   2  -5   6  517.07   16.55
   2  -5   6  498.41   20.48
   2  -5   6  505.85   17.47
   2  -5   6  492.04   19.11
   2  -5   7  160.01    5.18
   2  -5   7  156.67    7.36
   2  -5   7  148.03    9.85
   2  -5   7  156.54    8.10
   2  -5   7  164.33    9.78
   2  -5   8  189.83    8.35
   2  -5   8  198.43   11.54
   2  -5   8  185.46   12.67
   2  -5   8  191.34    9.22
   2  -5   8  188.74   10.95
   2  -5   9  627.38   24.02
   2  -5   9  651.86   19.84
   2  -5   9  605.95   26.42
   2  -5   9  634.98   20.84
   2  -5   9  640.18   23.95
   2  -5  10   75.34    4.92
   2  -5  10   68.56    7.84
   2  -5  10   72.53    5.37
   2  -5  10   73.12    4.91
   2  -5  10   81.30    7.21
   2  -5  10   76.99    6.76
   2  -5  11    5.27    1.80
   2  -5  11    4.56    2.64
   2  -5  11    4.75    1.32
   2  -5  11    3.62    0.98
   2  -5  11    2.37    1.08
   2  -5  11    3.66    1.67
   2  -5  12  817.02   29.19
   2  -5  12  782.40   23.76
   2  -5  13   42.54    5.57
   2  -4 -10   16.62    3.94
   2  -4 -10   10.51    2.42
   2  -4  -9   50.53    6.57
   2  -4  -9   45.85    4.86
   2  -4  -9   40.12    3.94
   2  -4  -8  119.20    7.96
   2  -4  -8  125.24   10.01
   2  -4  -8  110.72    7.30
   2  -4  -7  645.53   25.71
   2  -4  -7  579.21   24.47
   2  -4  -7  581.82   21.19
   2  -4  -6  161.82   10.80
   2  -4  -6  147.14    9.51
   2  -4  -6  152.59   10.78
   2  -4  -5  415.96   18.70
   2  -4  -5  457.25   17.98
   2  -4  -5  450.32   19.68
   2  -4  -5  457.98   16.83
   2  -4  -4  365.96   15.22
   2  -4  -4  320.20   15.17
   2  -4  -4  329.25   15.79
   2  -4  -4  344.79   13.63
   2  -4  -3 1161.33   35.44
   2  -4  -3 1173.98   36.32
   2  -4  -3 1099.18   33.25
   2  -4  -2    3.78    1.15
   2  -4  -2    5.43    1.68
   2  -4  -2    4.34    1.40
   2  -4  -2    5.46    1.74
   2  -4  -1 3400.69   87.33
   2  -4  -1 3474.22   88.77
   2  -4  -1 3488.26   88.00
   2  -4   0 2465.16   63.79
   2  -4   0 2473.12   63.16
   2  -4   0 2461.69   64.41
   2  -4   1  602.54   19.49
   2  -4   1  636.29   19.77
   2  -4   1  582.90   19.49
   2  -4   1  611.54   20.04
   2  -4   2  818.95   24.24
   2  -4   2  745.57   23.11
   2  -4   2  828.23   24.00
   2  -4   2  816.15   24.60
   2  -4   3  325.12   11.11
   2  -4   3  316.88   11.81
   2  -4   3  308.77   11.61
   2  -4   3  292.10   12.21
   2  -4   4 1257.79   32.01
   2  -4   4 1218.37   33.52
   2  -4   4 1256.29   33.77
   2  -4   4 1196.10   35.06
   2  -4   5 1541.30   37.81
   2  -4   5 1563.66   40.45
   2  -4   5 1514.74   40.26
   2  -4   5 1520.09   43.86
   2  -4   5 1488.77   42.42
   2  -4   6 1439.16   37.38
   2  -4   6 1373.47   37.04
   2  -4   6 1359.16   40.42
   2  -4   6 1373.64   39.58
   2  -4   7  241.30    9.86
   2  -4   7  241.17   11.87
   2  -4   7  255.64    9.87
   2  -4   7  226.90   11.34
   2  -4   8  398.54   15.06
   2  -4   8  434.48   19.25
   2  -4   8  417.29   16.68
   2  -4   8  388.42   14.06
   2  -4   8  400.73   13.84
   2  -4   8  413.03   16.62
   2  -4   9    4.59    1.55
   2  -4   9    8.69    2.76
   2  -4   9    9.82    2.12
   2  -4   9    7.94    1.75
   2  -4   9    6.35    1.45
   2  -4   9    9.13    1.76
   2  -4  10    4.16    1.46
   2  -4  10    8.75    2.30
   2  -4  10    7.50    1.74
   2  -4  10    7.98    2.07
   2  -4  10    6.22    1.35
   2  -4  10    4.07    1.20
   2  -4  10    7.58    2.14
   2  -4  11   10.83    2.53
   2  -4  11   15.35    3.50
   2  -4  11   14.94    2.59
   2  -4  11   11.18    2.27
   2  -4  11   14.74    2.52
   2  -4  11   19.84    2.49
   2  -4  12  212.85   11.49
   2  -4  12  242.31   14.79
   2  -4  12  241.47    9.99
   2  -4  12  240.44   12.91
   2  -4  12  229.61   11.36
   2  -4  13   99.60    9.40
   2  -4  13  106.33    8.42
   2  -4  13  102.91    7.40
   2  -3 -11   50.68    6.73
   2  -3 -11   45.73    5.06
   2  -3 -10   71.57    6.33
   2  -3 -10   67.68    7.40
   2  -3  -9  197.80   12.70
   2  -3  -9  188.81   10.52
   2  -3  -9  183.32    7.96
   2  -3  -9  171.87   12.32
   2  -3  -9  183.94    7.45
   2  -3  -8  157.26   10.83
   2  -3  -8  160.22    9.28
   2  -3  -8  154.73   11.03
   2  -3  -8  155.84    7.85
   2  -3  -7   12.71    2.84
   2  -3  -7    9.85    2.19
   2  -3  -7   10.92    2.75
   2  -3  -6  362.73   16.11
   2  -3  -6  329.40   13.30
   2  -3  -6  310.94   15.48
   2  -3  -5  192.00   10.91
   2  -3  -5  206.79    9.83
   2  -3  -4   16.50    2.42
   2  -3  -4   14.64    2.57
   2  -3  -3 2653.10   68.54
   2  -3  -3 2779.40   69.50
   2  -3  -2  503.94   17.52
   2  -3  -2  520.21   18.10
   2  -3  -2  477.20   16.17
   2  -3  -1  714.96   22.07
   2  -3  -1  716.78   21.24
   2  -3  -1  699.34   22.46
   2  -3   0  759.49   22.31
   2  -3   0  736.46   21.93
   2  -3   0  751.38   22.82
   2  -3   1  495.17   15.85
   2  -3   1  502.00   16.36
   2  -3   2 3012.22   74.92
   2  -3   2 2896.10   73.45
   2  -3   2 2923.74   74.00
   2  -3   3  261.18    8.57
   2  -3   3  265.58   10.01
   2  -3   3  257.65    9.28
   2  -3   3  275.58   10.53
   2  -3   4 1441.25   35.29
   2  -3   4 1456.16   38.24
   2  -3   4 1508.69   37.34
   2  -3   4 1422.73   39.08
   2  -3   5 1655.55   42.46
   2  -3   5 1550.84   40.66
   2  -3   5 1567.53   39.48
   2  -3   6 4140.86   99.72
   2  -3   6 4080.05   98.12
   2  -3   6 3989.29   96.37
   2  -3   6 3865.95   99.22
   2  -3   7 1484.69   41.57
   2  -3   7 1533.36   38.44
   2  -3   7 1466.36   41.20
   2  -3   7 1488.05   41.36
   2  -3   8  890.75   30.26
   2  -3   8  916.04   28.21
   2  -3   8  885.62   27.16
   2  -3   8  906.54   24.67
   2  -3   8  911.03   27.89
   2  -3   9  638.87   21.29
   2  -3   9  628.17   22.52
   2  -3   9  704.36   25.40
   2  -3   9  655.11   19.14
   2  -3   9  663.62   21.81
   2  -3   9  689.02   22.66
   2  -3  10  278.26   13.36
   2  -3  10  287.91   14.68
   2  -3  10  267.34   10.06
   2  -3  10  284.89   12.65
   2  -3  10  285.54   12.91
   2  -3  10  267.72   10.96
   2  -3  11   83.72    7.01
   2  -3  11   79.64    7.40
   2  -3  11   83.25    4.81
   2  -3  11   79.47    4.60
   2  -3  11   89.81    6.71
   2  -3  11   80.79    4.29
   2  -3  11   74.87    6.18
   2  -3  12   32.66    4.04
   2  -3  12   37.06    4.93
   2  -3  12   33.32    4.21
   2  -3  12   33.09    3.00
   2  -3  12   31.76    4.66
   2  -3  13  147.30    9.36
   2  -3  13  157.63   10.21
   2  -2 -12  199.52   13.53
   2  -2 -12  197.39   11.70
   2  -2 -11   44.34    5.88
   2  -2 -11   50.46    5.55
   2  -2 -10 1326.02   42.13
   2  -2 -10 1308.77   39.47
   2  -2 -10 1189.48   41.54
   2  -2  -9  396.36   18.36
   2  -2  -9  417.23   17.05
   2  -2  -9  408.75   11.81
   2  -2  -9  404.51   18.79
   2  -2  -9  395.25   11.47
   2  -2  -8 2036.34   51.28
   2  -2  -8 1991.42   57.50
   2  -2  -8 1948.32   55.10
   2  -2  -8 2078.91   58.43
   2  -2  -8 2046.08   50.41
   2  -2  -7 1628.13   48.00
   2  -2  -7 1651.98   46.04
   2  -2  -7 1681.39   43.25
   2  -2  -7 1630.66   48.29
   2  -2  -6    2.02    1.00
   2  -2  -6    2.39    1.39
   2  -2  -5   56.42    5.02
   2  -2  -5   56.09    5.11
   2  -2  -4  353.07   14.01
   2  -2  -4  343.61   14.05
   2  -2  -3  132.88    7.45
   2  -2  -3  125.81    6.35
   2  -2  -2 1544.41   41.58
   2  -2  -2 1562.89   42.66
   2  -2  -1 1919.43   47.59
   2  -2  -1 1755.17   46.65
   2  -2  -1 1813.80   46.18
   2  -2   0    1.16    0.45
   2  -2   0    0.61    0.34
   2  -2   1  380.94   11.67
   2  -2   1  385.17   12.71
   2  -2   1  373.99   12.16
   2  -2   2 2964.06   71.74
   2  -2   2 2906.00   73.64
   2  -2   2 3131.75   73.59
   2  -2   3    7.17    1.27
   2  -2   3    8.64    0.81
   2  -2   3    7.29    1.49
   2  -2   3    8.87    1.07
   2  -2   3    7.60    1.29
   2  -2   4  401.11   14.39
   2  -2   4  414.12   11.38
   2  -2   4  402.83   13.29
   2  -2   5  168.27    8.31
   2  -2   5  171.29    5.70
   2  -2   5  169.28    7.43
   2  -2   6  709.19   22.70
   2  -2   6  706.06   18.41
   2  -2   6  699.24   21.11
   2  -2   7    2.47    0.89
   2  -2   7    2.53    0.97
   2  -2   7    1.60    0.52
   2  -2   8  376.37   15.49
   2  -2   8  364.86   15.22
   2  -2   8  368.37   11.18
   2  -2   8  349.60   12.50
   2  -2   8  375.93   13.66
   2  -2   9    2.31    1.04
   2  -2   9    1.87    1.11
   2  -2   9    3.46    1.04
   2  -2   9    2.72    1.33
   2  -2   9    4.46    1.70
   2  -2   9    1.82    0.57
   2  -2   9    2.59    0.79
   2  -2  10  457.97   18.26
   2  -2  10  460.81   19.36
   2  -2  10  456.86   14.08
   2  -2  10  451.85   12.91
   2  -2  10  475.85   18.55
   2  -2  10  478.16   16.88
   2  -2  10  450.69   12.68
   2  -2  11  586.24   21.69
   2  -2  11  586.38   23.79
   2  -2  11  571.28   17.55
   2  -2  11  631.18   23.05
   2  -2  11  639.38   20.81
   2  -2  12  202.81   10.98
   2  -2  12  214.40   13.38
   2  -2  12  218.14   10.62
   2  -2  12  214.27   12.44
   2  -2  13  334.24   14.07
   2  -2  13  325.87   16.83
   2  -1 -13   24.16    4.49
   2  -1 -12  789.67   29.41
   2  -1 -12  712.30   27.54
   2  -1 -11    3.14    2.00
   2  -1 -11    1.42    1.03
   2  -1 -11    2.95    2.03
   2  -1 -10  336.34   16.14
   2  -1 -10  298.82   14.95
   2  -1 -10  346.83   16.53
   2  -1  -9  640.27   24.01
   2  -1  -9  649.02   23.51
   2  -1  -9  654.53   24.29
   2  -1  -8  709.26   18.62
   2  -1  -8  697.55   24.54
   2  -1  -8  645.06   23.39
   2  -1  -8  692.35   18.84
   2  -1  -8  666.59   24.22
   2  -1  -7  124.29    8.01
   2  -1  -7  109.67    7.25
   2  -1  -7  122.15    7.99
   2  -1  -7  130.39    5.42
   2  -1  -6  307.47   13.15
   2  -1  -6  298.64   12.55
   2  -1  -6  317.39   10.24
   2  -1  -6  302.51   13.16
   2  -1  -5  772.95   23.88
   2  -1  -5  741.01   20.66
   2  -1  -5  738.13   23.65
   2  -1  -4  161.88    8.08
   2  -1  -4  173.88    8.28
   2  -1  -3 9999.00  235.58
   2  -1  -2  480.35   15.52
   2  -1  -2  508.91   15.66
   2  -1  -2  488.12   14.95
   2  -1  -1   54.07    3.49
   2  -1  -1   54.40    3.56
   2  -1  -1   63.19    3.55
   2  -1   0  850.38   23.93
   2  -1   0  913.33   23.41
   2  -1   0  868.33   23.19
   2  -1   2  107.50    5.87
   2  -1   2  112.15    4.61
   2  -1   3   71.79    4.80
   2  -1   3   74.13    3.62
   2  -1   4  457.01   15.87
   2  -1   4  448.01   13.16
   2  -1   5  115.15    6.85
   2  -1   5  104.30    4.96
   2  -1   5  112.44    5.01
   2  -1   6  104.83    6.91
   2  -1   6  109.65    6.11
   2  -1   6  109.66    3.71
   2  -1   6  106.82    4.92
   2  -1   6  102.13    5.03
   2  -1   7  163.78    8.13
   2  -1   7  158.24    9.26
   2  -1   7  167.79    5.71
   2  -1   7  171.88    7.18
   2  -1   7  168.43    6.50
   2  -1   8    1.03    0.69
   2  -1   8    2.14    0.65
   2  -1   8    0.72    0.63
   2  -1   8    3.76    1.35
   2  -1   8    1.91    0.72
   2  -1   8    3.82    0.70
   2  -1   9   36.57    3.60
   2  -1   9   38.06    2.74
   2  -1   9   34.88    4.52
   2  -1   9   39.68    4.54
   2  -1   9   35.32    3.14
   2  -1  10 1332.34   37.57
   2  -1  10 1335.38   42.95
   2  -1  10 1373.96   35.43
   2  -1  10 1379.44   34.90
   2  -1  10 1357.55   41.76
   2  -1  10 1346.14   36.73
   2  -1  11    0.92    0.68
   2  -1  11    1.95    0.79
   2  -1  11    2.29    1.41
   2  -1  11    3.11    2.34
   2  -1  11    1.17    0.79
   2  -1  11    2.21    0.83
   2  -1  12  207.71   13.95
   2  -1  12  223.60    8.56
   2  -1  12  232.57    9.87
   2  -1  12  226.63   13.73
   2  -1  13    5.85    2.08
   2   0 -13    8.00    2.35
   2   0 -13    4.25    1.96
   2   0 -12  113.77    9.00
   2   0 -12  125.87    9.69
   2   0 -11  224.97   12.65
   2   0 -10    1.33    1.11
   2   0 -10    2.74    1.45
   2   0 -10    3.57    1.65
   2   0  -9  322.14   14.51
   2   0  -9  328.72   15.23
   2   0  -9  301.26   13.92
   2   0  -8    8.48    2.01
   2   0  -8    8.28    2.23
   2   0  -8    5.05    1.58
   2   0  -8    6.90    1.01
   2   0  -7   10.92    2.11
   2   0  -7    8.74    1.85
   2   0  -7    9.27    1.20
   2   0  -7    8.29    1.84
   2   0  -6  864.23   23.22
   2   0  -6  818.14   25.97
   2   0  -6  870.94   26.84
   2   0  -6  866.97   25.86
   2   0  -5  561.13   17.74
   2   0  -5  506.32   17.53
   2   0  -5  501.98   16.75
   2   0  -5  509.28   15.19
   2   0  -4   90.47    5.37
   2   0  -4   98.60    5.67
   2   0  -4   91.19    4.53
   2   0  -4   85.51    4.96
   2   0  -3 5452.99  130.26
   2   0  -2  533.00   15.83
   2   0  -2  544.31   16.19
   2   0  -2  553.92   15.83
   2   0  -1 3690.10   86.99
   2   0  -1 3566.85   86.94
   2   0   0   26.05    2.54
   2   0   0   23.95    2.09
   2   0   0   24.06    2.09
   2   0   1  184.97    7.85
   2   0   1  174.41    6.77
   2   0   1  171.66    5.66
   2   0   2 4209.95  102.56
   2   0   3 6678.85  160.07
   2   0   4 2380.43   62.74
   2   0   4 2447.15   59.39
   2   0   5   46.30    3.02
   2   0   5   49.67    2.97
   2   0   5   49.62    4.56
   2   0   5   37.17    1.83
   2   0   5   40.35    2.11
   2   0   6 2193.39   53.85
   2   0   6 2202.38   53.82
   2   0   6 2282.34   59.65
   2   0   6 2145.34   52.43
   2   0   6 2204.34   52.37
   2   0   6 2106.27   58.06
   2   0   6 2221.29   52.63
   2   0   7  971.03   26.32
   2   0   7  980.06   32.09
   2   0   7  981.46   25.71
   2   0   7 1013.79   26.10
   2   0   7 1003.95   25.57
   2   0   7 1023.80   31.46
   2   0   7 1009.72   25.65
   2   0   8   74.42    3.98
   2   0   8   77.55    6.96
   2   0   8   76.36    4.01
   2   0   8   75.26    3.87
   2   0   8   79.46    3.19
   2   0   8   77.17    6.54
   2   0   8   74.18    3.80
   2   0   9   23.76    2.25
   2   0   9   19.42    3.55
   2   0   9   22.84    2.17
   2   0   9   24.42    4.03
   2   0   9   24.55    2.12
   2   0  10  725.85   28.82
   2   0  10  732.16   21.65
   2   0  10  769.45   21.56
   2   0  10  746.54   28.04
   2   0  10  762.08   20.85
   2   0  10  747.65   20.48
   2   0  11  135.31   11.03
   2   0  11  124.63    6.50
   2   0  11  129.46    6.40
   2   0  11  143.99    5.92
   2   0  11  124.06   10.00
   2   0  11  141.44    5.69
   2   0  12  211.65   14.01
   2   1 -13   16.00    3.66
   2   1 -12  181.28   12.31
   2   1 -11  125.15    9.77
   2   1 -10  338.80   14.93
   2   1 -10  337.78   14.35
   2   1  -9  568.68   15.35
   2   1  -9  563.91   20.20
   2   1  -9  519.73   21.58
   2   1  -9  536.57   19.09
   2   1  -8   58.83    5.00
   2   1  -8   48.59    5.25
   2   1  -8   47.98    3.14
   2   1  -8   54.57    4.34
   2   1  -7   63.10    4.93
   2   1  -7   55.51    5.34
   2   1  -7   67.41    3.99
   2   1  -7   66.20    4.61
   2   1  -6 2714.15   65.64
   2   1  -6 2738.49   66.33
   2   1  -5 3309.44   82.57
   2   1  -5 3216.90   79.26
   2   1  -5 3260.83   79.17
   2   1  -4  332.11   11.56
   2   1  -4  351.90   13.20
   2   1  -4  348.61   11.08
   2   1  -3  323.06   10.17
   2   1  -3  328.47   11.13
   2   1  -3  313.02   11.85
   2   1  -2 1123.81   29.05
   2   1  -2 1034.61   27.53
   2   1  -2 1030.05   28.36
   2   1  -2 1041.41   28.74
   2   1  -1 1203.68   31.92
   2   1  -1 1189.19   31.95
   2   1  -1 1196.13   31.49
   2   1  -1 1228.18   31.02
   2   1   0 4599.16  114.83
   2   1   0 5081.01  115.92
   2   1   1 3748.40   90.45
   2   1   1 3733.04   91.61
   2   1   2  404.32   13.50
   2   1   2  429.67   11.50
   2   1   2  443.19   15.25
   2   1   2  429.82   11.96
   2   1   3 5443.82  132.44
   2   1   4    8.16    1.84
   2   1   4    7.80    1.01
   2   1   4   10.80    1.55
   2   1   5    2.04    0.87
   2   1   5    4.83    1.58
   2   1   5    4.31    0.85
   2   1   5    5.94    1.20
   2   1   6  163.50    9.99
   2   1   6  162.02    6.47
   2   1   6  158.58    6.84
   2   1   6  158.47    9.37
   2   1   7  470.66   19.70
   2   1   7  456.62   14.10
   2   1   7  445.23   18.63
   2   1   7  461.92   13.92
   2   1   8 1052.92   26.22
   2   1   8 1030.71   35.45
   2   1   8 1040.80   28.41
   2   1   8 1043.62   34.64
   2   1   9  245.31   14.58
   2   1   9  253.99    9.82
   2   1   9  240.07   13.86
   2   1  10  364.69   19.29
   2   1  10  354.49   13.17
   2   1  10  370.80   13.29
   2   1  10  408.72   19.51
   2   1  11  124.76    7.02
   2   1  11  139.36    7.20
   2   1  11  148.79   11.63
   2   1  12   19.09    4.26
   2   2 -12  923.11   34.57
   2   2 -11   43.89    5.81
   2   2 -10  220.07   13.52
   2   2 -10  228.76    8.26
   2   2  -9  349.82   12.16
   2   2  -9  318.85   16.32
   2   2  -9  340.68   12.56
   2   2  -8  592.57   23.25
   2   2  -8  621.66   18.44
   2   2  -8  591.98   18.59
   2   2  -7  205.31   11.54
   2   2  -7  220.86    9.16
   2   2  -7  213.11    8.18
   2   2  -6 1357.51   40.45
   2   2  -6 1325.92   36.89
   2   2  -6 1393.78   34.88
   2   2  -5  602.34   21.50
   2   2  -5  637.96   20.11
   2   2  -5  616.29   19.58
   2   2  -5  631.74   17.22
   2   2  -4   25.57    1.83
   2   2  -4   24.64    3.15
   2   2  -4   27.01    2.86
   2   2  -4   28.90    2.95
   2   2  -3 1036.67   28.03
   2   2  -3 1063.14   30.59
   2   2  -3 1088.31   26.87
   2   2  -3  999.82   29.02
   2   2  -3 1048.14   29.73
   2   2  -2 1437.88   36.52
   2   2  -2 1380.74   37.81
   2   2  -2 1373.65   36.79
   2   2  -2 1405.83   37.87
   2   2  -1  594.45   17.70
   2   2  -1  551.61   17.31
   2   2  -1  563.96   17.06
   2   2  -1  562.95   18.21
   2   2   0   86.40    4.56
   2   2   0   75.03    4.87
   2   2   0   80.31    4.40
   2   2   0   77.69    5.05
   2   2   1 1162.61   32.86
   2   2   1 1177.99   30.71
   2   2   1 1158.50   32.44
   2   2   2  101.61    6.44
   2   2   2  110.23    5.15
   2   2   2   93.99    5.72
   2   2   3 5043.06  119.36
   2   2   3 4458.94  114.13
   2   2   3 4871.05  116.47
   2   2   3 4547.56  117.57
   2   2   4    6.29    1.42
   2   2   4    6.44    1.61
   2   2   4    7.06    2.01
   2   2   4    7.55    1.32
   2   2   5   36.67    4.54
   2   2   5   41.22    3.20
   2   2   5   36.64    4.26
   2   2   5   39.48    3.48
   2   2   6  125.01    9.32
   2   2   6  137.19    6.63
   2   2   6  132.94    9.04
   2   2   6  141.18    7.02
   2   2   7   23.18    2.46
   2   2   7   26.68    4.05
   2   2   7   20.57    3.91
   2   2   7   18.32    2.35
   2   2   8   10.27    2.79
   2   2   8   12.85    3.11
   2   2   8   12.00    1.97
   2   2   9  976.96   37.07
   2   2   9 1029.74   29.81
   2   2   9 1033.01   36.64
   2   2  10  668.49   21.94
   2   2  10  673.01   28.61
   2   2  11  137.54    8.01
   2   2  11  151.98   12.41
   2   3 -11  288.13   16.76
   2   3 -10   31.33    5.06
   2   3 -10   32.28    3.30
   2   3  -9   74.98    5.31
   2   3  -9   65.82    7.03
   2   3  -8    9.75    1.85
   2   3  -8   10.55    2.73
   2   3  -7  817.56   28.46
   2   3  -7  787.68   25.48
   2   3  -7  793.22   20.09
   2   3  -7  738.87   24.31
   2   3  -6 1768.15   51.81
   2   3  -6 1749.61   48.82
   2   3  -6 1824.92   43.15
   2   3  -6 1793.07   48.75
   2   3  -5 2288.00   58.23
   2   3  -5 2308.66   58.69
   2   3  -5 2275.56   52.64
   2   3  -4  689.20   19.21
   2   3  -4  701.40   18.05
   2   3  -4  686.29   23.59
   2   3  -4  728.68   22.25
   2   3  -4  646.13   22.20
   2   3  -3  108.76    5.29
   2   3  -3  104.84    6.84
   2   3  -3  101.34    6.08
   2   3  -3  106.85    6.71
   2   3  -2 2683.05   65.11
   2   3  -2 2519.68   66.94
   2   3  -2 2624.24   66.17
   2   3  -2 2582.30   67.48
   2   3  -1  635.25   20.35
   2   3  -1  652.30   21.96
   2   3   0    6.38    1.62
   2   3   0    5.66    1.31
   2   3   0    4.98    1.19
   2   3   0    7.79    1.45
   2   3   1 2187.27   60.57
   2   3   1 2338.89   58.98
   2   3   1 2258.09   60.81
   2   3   2  560.32   20.36
   2   3   2  600.21   18.43
   2   3   2  568.06   19.73
   2   3   2  551.46   19.46
   2   3   3  156.93    9.39
   2   3   3  133.20    6.98
   2   3   3  142.29    8.54
   2   3   3  144.98    8.07
   2   3   4  298.84   14.47
   2   3   4  287.65   11.40
   2   3   4  276.59   13.47
   2   3   4  294.96   12.39
   2   3   5   92.40    6.26
   2   3   5   96.66    8.05
   2   3   5   96.37    6.00
   2   3   5   97.86    7.82
   2   3   6  107.55    6.75
   2   3   6  126.63    9.80
   2   3   6  111.75    6.72
   2   3   6  119.03    9.09
   2   3   7  203.91   13.61
   2   3   7  214.54   10.10
   2   3   7  211.16    9.63
   2   3   7  213.09   13.25
   2   3   8  752.32   30.88
   2   3   8  746.83   24.33
   2   3   8  747.06   29.93
   2   3   9  192.65   10.04
   2   3   9  191.38   13.78
   2   3  10   12.10    3.53
   2   3  10    9.58    2.14
   2   3  11  121.12   11.72
   2   4 -10   91.42    6.57
   2   4  -9  216.76   11.02
   2   4  -8 1522.29   44.33
   2   4  -8 1587.02   48.63
   2   4  -8 1494.07   44.35
   2   4  -7   84.81    6.56
   2   4  -7   84.66    7.74
   2   4  -7   92.20    6.76
   2   4  -6  440.31   16.14
   2   4  -6  420.08   16.48
   2   4  -5 3164.62   83.91
   2   4  -5 3189.99   81.17
   2   4  -5 3128.60   82.09
   2   4  -4 1237.00   32.88
   2   4  -4 1334.81   39.13
   2   4  -4 1285.43   31.81
   2   4  -4 1347.93   38.40
   2   4  -3 1718.89   44.54
   2   4  -3 1786.98   47.47
   2   4  -3 1667.85   43.21
   2   4  -3 1776.69   48.87
   2   4  -2  799.98   23.58
   2   4  -2  806.34   24.90
   2   4  -2  774.31   22.57
   2   4  -2  764.72   26.11
   2   4  -1  284.01   11.81
   2   4  -1  289.01   12.13
   2   4  -1  284.62   11.28
   2   4  -1  301.37   13.55
   2   4   0 3251.95   83.12
   2   4   0 3425.91   82.75
   2   4   0 3110.06   81.84
   2   4   0 3303.85   84.74
   2   4   1 2895.57   74.91
   2   4   1 3019.22   73.29
   2   4   1 2857.04   69.99
   2   4   1 2815.55   74.93
   2   4   2 1250.49   37.20
   2   4   2 1181.59   34.35
   2   4   2 1202.26   31.09
   2   4   2 1140.28   35.62
   2   4   2 1159.68   35.98
   2   4   3  136.59    8.66
   2   4   3  120.06    8.88
   2   4   3  150.44    8.23
   2   4   3  143.54    5.66
   2   4   3  119.31    8.47
   2   4   4  200.86   10.89
   2   4   4  218.75   12.73
   2   4   4  191.35    9.85
   2   4   4  195.35   11.66
   2   4   5  419.78   16.82
   2   4   5  361.84   18.59
   2   4   5  411.60   15.98
   2   4   5  387.83   18.51
   2   4   6    5.95    1.83
   2   4   6    6.01    2.52
   2   4   6    5.41    2.44
   2   4   6    3.15    1.00
   2   4   7   10.81    3.03
   2   4   7   12.46    2.43
   2   4   8   83.24    6.69
   2   4   8   86.55    9.19
   2   4   9   73.81    6.47
   2   4   9   90.02    9.70
   2   4  10   88.68    7.27
   2   4  10   89.42   10.27
   2   5 -10    8.63    2.23
   2   5  -9 1157.61   36.57
   2   5  -9 1098.40   35.76
   2   5  -8 2090.73   57.68
   2   5  -8 1937.43   56.40
   2   5  -7  645.03   24.38
   2   5  -7  639.74   23.46
   2   5  -6  143.69    9.88
   2   5  -6  164.33    9.74
   2   5  -5   91.07    4.51
   2   5  -5   80.66    6.56
   2   5  -5   91.85    7.51
   2   5  -5   90.38    3.69
   2   5  -4   68.23    6.52
   2   5  -4   81.73    4.87
   2   5  -4   85.02    6.60
   2   5  -4   83.88    4.36
   2   5  -3    9.48    2.24
   2   5  -3    9.64    1.63
   2   5  -3   10.56    1.83
   2   5  -3    5.74    1.65
   2   5  -2   34.44    4.55
   2   5  -2   34.93    3.65
   2   5  -2   45.32    4.61
   2   5  -2   40.85    3.60
   2   5  -1  300.49   15.16
   2   5  -1  323.61   13.74
   2   5  -1  320.75   14.00
   2   5  -1  339.71   12.91
   2   5  -1  303.92   12.88
   2   5   0  302.43   15.00
   2   5   0  308.11   14.07
   2   5   0  303.63   13.59
   2   5   0  319.76   12.13
   2   5   0  293.60   13.26
   2   5   1 2893.55   80.61
   2   5   1 3076.51   80.24
   2   5   1 3031.45   78.43
   2   5   1 3064.48   75.05
   2   5   1 2922.88   78.77
   2   5   2  614.32   24.06
   2   5   2  666.78   24.92
   2   5   2  607.36   22.34
   2   5   2  657.67   19.60
   2   5   2  633.01   23.73
   2   5   3  169.44   10.81
   2   5   3  175.93   11.61
   2   5   3  176.08    9.98
   2   5   3  175.86    7.47
   2   5   3  168.51   11.02
   2   5   4    1.81    0.73
   2   5   4    2.70    1.55
   2   5   4    2.95    1.62
   2   5   4    3.88    1.92
   2   5   4    2.04    1.33
   2   5   5  676.69   29.01
   2   5   5  721.00   25.50
   2   5   5  756.80   26.57
   2   5   5  699.53   28.49
   2   5   6  565.46   22.06
   2   5   6  593.94   22.51
   2   5   6  575.97   25.84
   2   5   7  608.12   23.29
   2   5   7  615.67   27.93
   2   5   8  105.98    8.38
   2   5   8   95.71   10.24
   2   5   9    2.73    1.52
   2   6 -11  201.24   12.83
   2   6 -10  235.98   13.68
   2   6 -10  243.41   13.91
   2   6  -9  138.62    9.81
   2   6  -9  112.31    9.21
   2   6  -8 1035.34   34.63
   2   6  -8 1028.73   35.64
   2   6  -7   62.56    6.62
   2   6  -7   50.40    5.67
   2   6  -6   43.31    2.44
   2   6  -6   47.65    5.58
   2   6  -6   39.81    5.41
   2   6  -5  264.95    9.95
   2   6  -5  255.82   14.56
   2   6  -5  250.35   13.33
   2   6  -5  254.02    8.79
   2   6  -4   30.98    4.78
   2   6  -4   32.56    2.94
   2   6  -3   71.63    7.36
   2   6  -3   91.10    6.18
   2   6  -3   91.92    7.42
   2   6  -3   96.16    5.94
   2   6  -2  352.12   17.44
   2   6  -2  331.48   14.32
   2   6  -2  317.48   15.31
   2   6  -2  346.90   14.00
   2   6  -1    4.25    1.33
   2   6  -1    6.00    1.70
   2   6  -1    6.41    1.90
   2   6  -1    6.91    1.95
   2   6  -1    7.47    2.35
   2   6   0 1921.65   55.81
   2   6   0 1822.03   52.90
   2   6   0 1779.51   52.30
   2   6   0 1779.77   49.19
   2   6   0 1853.77   52.19
   2   6   1 1071.34   36.86
   2   6   1 1086.76   36.10
   2   6   1 1032.79   34.39
   2   6   1 1053.58   31.29
   2   6   1 1151.67   35.93
   2   6   2  144.11   10.61
   2   6   2  140.01   10.42
   2   6   2  150.59    9.88
   2   6   2  142.76    7.72
   2   6   2  145.83   10.43
   2   6   3    3.14    0.95
   2   6   3    3.48    1.78
   2   6   3    3.40    1.52
   2   6   3    4.67    2.33
   2   6   4  280.69   17.32
   2   6   4  318.09   15.68
   2   6   4  318.77   16.55
   2   6   4  318.95   11.51
   2   6   4  306.09   17.41
   2   6   5  198.28   12.08
   2   6   5  191.35   12.14
   2   6   5  168.69   12.90
   2   6   6  170.25   11.36
   2   6   6  176.23   13.68
   2   6   7  268.41   15.14
   2   6   7  310.92   19.36
   2   7 -12   38.68    5.72
   2   7 -11   80.33    8.07
   2   7 -10   35.15    5.36
   2   7 -10   39.35    5.52
   2   7  -9  167.98   11.77
   2   7  -9  184.05   12.79
   2   7  -8  704.33   27.75
   2   7  -8  735.38   29.50
   2   7  -7  503.52   21.53
   2   7  -7  407.48   21.02
   2   7  -6  172.50    5.82
   2   7  -6  179.26    7.16
   2   7  -6  160.61   11.31
   2   7  -6  182.58   12.82
   2   7  -5   80.00    5.42
   2   7  -5   83.86    8.48
   2   7  -5   92.82    8.19
   2   7  -5   81.76    4.76
   2   7  -4  535.24   19.07
   2   7  -4  545.02   24.63
   2   7  -4  526.00   22.57
   2   7  -4  534.16   18.01
   2   7  -3  776.26   26.02
   2   7  -3  759.03   30.74
   2   7  -3  744.52   28.38
   2   7  -3  797.07   25.24
   2   7  -2 1123.20   35.94
   2   7  -2 1118.08   40.23
   2   7  -2 1157.31   38.05
   2   7  -2 1161.90   35.74
   2   7  -2 1146.24   35.17
   2   7  -1  866.20   29.98
   2   7  -1  806.02   32.15
   2   7  -1  848.47   30.50
   2   7  -1  858.30   27.94
   2   7  -1  805.20   28.41
   2   7   0  219.59   13.34
   2   7   0  224.52   13.35
   2   7   0  238.56   15.13
   2   7   0  233.32   11.59
   2   7   0  230.95   13.03
   2   7   1  121.55   10.04
   2   7   1  119.56    9.37
   2   7   1  121.28   10.42
   2   7   1  117.19    7.62
   2   7   1  141.56   10.25
   2   7   2   14.61    2.43
   2   7   2   14.32    3.55
   2   7   2   15.40    3.51
   2   7   2   15.25    3.54
   2   7   2   13.06    3.33
   2   7   3    8.08    1.78
   2   7   3    6.30    2.81
   2   7   3    3.98    1.33
   2   7   3    3.48    2.24
   2   7   4   17.15    3.95
   2   7   4   21.69    4.00
   2   7   5  354.12   18.29
   2   7   5  347.47   20.50
   2   7   6  205.19   13.62
   2   7   6  216.21   16.25
   2   8 -11  262.69   16.29
   2   8 -10  329.53   18.28
   2   8  -9   68.64    7.80
   2   8  -9   64.61    7.87
   2   8  -8  238.85   15.05
   2   8  -8  255.40   16.62
   2   8  -7    7.10    2.35
   2   8  -7    8.16    2.55
   2   8  -6  184.85    7.10
   2   8  -6  173.80    8.15
   2   8  -6  170.20   12.46
   2   8  -6  185.72   13.96
   2   8  -5   52.04    4.10
   2   8  -5   46.59    4.42
   2   8  -5   33.70    5.43
   2   8  -5   39.08    6.00
   2   8  -4  379.91   16.22
   2   8  -4  417.47   20.24
   2   8  -4  417.72   22.03
   2   8  -4  371.03   15.06
   2   8  -3  459.40   19.10
   2   8  -3  437.66   21.15
   2   8  -3  425.10   17.63
   2   8  -2 1431.65   44.16
   2   8  -2 1387.89   46.07
   2   8  -2 1363.68   48.60
   2   8  -2 1415.81   42.91
   2   8  -1  328.07   17.03
   2   8  -1  342.69   18.07
   2   8  -1  313.13   18.81
   2   8  -1  312.44   15.23
   2   8  -1  316.39   16.07
   2   8   0   47.66    7.23
   2   8   0   65.63    7.28
   2   8   0   66.87    7.46
   2   8   0   56.62    5.72
   2   8   0   65.29    7.04
   2   8   1  182.40   12.75
   2   8   1  152.91    9.55
   2   8   1  174.15   13.43
   2   8   1  170.28   12.38
   2   8   2  448.11   21.87
   2   8   2  443.86   17.93
   2   8   2  487.19   24.02
   2   8   2  463.44   22.79
   2   8   3  229.44   14.87
   2   8   3  210.77   15.24
   2   8   4  131.68   11.14
   2   8   4   99.89   10.72
   2   9  -9  375.34   20.75
   2   9  -8   26.20    5.20
   2   9  -7    2.38    2.25
   2   9  -7    2.11    1.58
   2   9  -6    9.04    1.56
   2   9  -6    8.79    3.07
   2   9  -6    6.90    3.10
   2   9  -5    8.82    2.93
   2   9  -5   10.11    2.02
   2   9  -5   10.43    2.38
   2   9  -5    8.52    2.88
   2   9  -4  256.94   12.80
   2   9  -4  255.76   13.64
   2   9  -4  275.95   18.41
   2   9  -3   14.06    4.25
   2   9  -3   13.00    2.77
   2   9  -3   13.09    3.08
   2   9  -3   14.10    3.91
   2   9  -2  136.19   10.71
   2   9  -2  133.46   11.60
   2   9  -2  163.27   13.84
   2   9  -2  158.62   10.83
   2   9  -1   85.59    8.78
   2   9  -1   83.82    9.02
   2   9  -1   75.13    9.35
   2   9  -1   83.90    8.21
   2   9   0    5.76    2.24
   2   9   0    7.27    2.70
   2   9   1   22.12    4.77
   2   9   1   11.96    3.35
   3  -9  -1   73.39    8.64
   3  -9  -1   77.39    7.95
   3  -9   0   17.25    3.76
   3  -9   0   21.37    4.56
   3  -9   1   16.13    3.62
   3  -9   1   19.42    4.13
   3  -9   2   65.64    7.32
   3  -9   2   53.42    6.89
   3  -9   3   39.65    5.69
   3  -9   3   37.74    5.54
   3  -9   3   34.98    5.22
   3  -9   4   33.64    5.31
   3  -9   4   33.73    4.92
   3  -9   4   28.05    4.37
   3  -9   5  100.42    8.24
   3  -9   5   93.46    8.11
   3  -9   5  105.45    9.52
   3  -9   6   12.93    3.42
   3  -9   6    7.75    2.37
   3  -9   7   37.74    5.80
   3  -9   7   31.26    4.06
   3  -9   8  310.32   18.03
   3  -8  -4  314.92   19.70
   3  -8  -4  360.75   18.01
   3  -8  -3   33.74    4.93
   3  -8  -3   34.16    5.74
   3  -8  -2   54.71    7.18
   3  -8  -2   56.87    6.40
   3  -8  -1  226.92   14.73
   3  -8  -1  235.40   13.67
   3  -8   0 1061.74   37.64
   3  -8   0 1059.06   36.10
   3  -8   1 1036.65   36.08
   3  -8   1 1038.18   36.45
   3  -8   1  977.62   34.58
   3  -8   2  916.33   32.41
   3  -8   2  892.56   32.47
   3  -8   2  904.91   32.37
   3  -8   3  132.46    9.48
   3  -8   3  114.81    9.10
   3  -8   3  128.44    9.91
   3  -8   4   32.87    4.92
   3  -8   4   35.55    4.52
   3  -8   4   33.72    4.55
   3  -8   5   76.99    6.52
   3  -8   5   74.85    7.11
   3  -8   5   70.11    7.37
   3  -8   5   69.29    6.35
   3  -8   6  135.85    8.34
   3  -8   6  124.79    9.41
   3  -8   6  133.91   10.54
   3  -8   6  120.10    8.31
   3  -8   7   78.05    5.71
   3  -8   7   69.00    6.62
   3  -8   7   84.65    8.24
   3  -8   7   73.08    6.04
   3  -8   8  185.45    8.37
   3  -8   8  167.26   10.84
   3  -8   8  202.33   13.24
   3  -8   9  657.45   25.12
   3  -8   9  723.51   28.99
   3  -8  10   26.14    4.83
   3  -7  -5   48.82    5.85
   3  -7  -5   49.87    7.20
   3  -7  -4  673.44   28.76
   3  -7  -4  625.76   28.32
   3  -7  -4  641.41   25.10
   3  -7  -3   47.06    6.37
   3  -7  -3   34.05    6.07
   3  -7  -3   51.83    5.72
   3  -7  -2   20.95    3.72
   3  -7  -2   16.09    3.62
   3  -7  -2   24.73    4.88
   3  -7  -1  420.79   19.61
   3  -7  -1  365.06   20.24
   3  -7  -1  405.77   19.76
   3  -7  -1  406.49   18.02
   3  -7   0   60.80    6.50
   3  -7   0   56.43    7.28
   3  -7   0   56.90    6.49
   3  -7   1  543.82   22.40
   3  -7   1  614.42   26.63
   3  -7   1  560.38   23.10
   3  -7   1  562.57   22.40
   3  -7   2 1645.52   49.46
   3  -7   2 1633.50   50.02
   3  -7   2 1737.95   50.51
   3  -7   3  251.88   12.66
   3  -7   3  255.33   16.00
   3  -7   3  238.30   13.34
   3  -7   3  246.47   13.06
   3  -7   4  144.08    8.78
   3  -7   4  150.63   11.95
   3  -7   4  172.01   10.23
   3  -7   4  145.08    9.99
   3  -7   4  147.41    9.46
   3  -7   5  545.35   19.20
   3  -7   5  533.69   24.89
   3  -7   5  519.50   20.55
   3  -7   5  524.08   21.95
   3  -7   5  551.68   20.57
   3  -7   6   84.45    5.76
   3  -7   6   82.78    8.77
   3  -7   6   80.04    6.68
   3  -7   6   88.39    7.80
   3  -7   6   76.17    6.22
   3  -7   7    4.84    1.83
   3  -7   7    2.75    1.06
   3  -7   7    2.55    0.97
   3  -7   7    2.15    1.18
   3  -7   7    4.10    2.46
   3  -7   8  247.91    8.13
   3  -7   8  237.67   15.65
   3  -7   8  238.03   12.19
   3  -7   8  241.03   14.14
   3  -7   8  254.78   11.41
   3  -7   9  386.02   20.57
   3  -7   9  377.51   16.00
   3  -7   9  409.86   19.19
   3  -7   9  361.30   14.45
   3  -7  10  160.50   12.73
   3  -7  10  174.38    9.86
   3  -7  10  196.19   12.86
   3  -7  11  191.98   13.03
   3  -6  -7  384.91   20.96
   3  -6  -7  343.34   18.04
   3  -6  -6  412.65   20.23
   3  -6  -5  387.79   20.19
   3  -6  -5  400.47   19.73
   3  -6  -5  369.56   17.07
   3  -6  -4  303.81   16.66
   3  -6  -4  277.49   15.99
   3  -6  -4  262.25   13.63
   3  -6  -3  161.34   11.42
   3  -6  -3  186.28   12.54
   3  -6  -3  175.16   12.19
   3  -6  -3  166.93   10.20
   3  -6  -2   12.96    2.63
   3  -6  -2    9.29    2.50
   3  -6  -2    8.32    2.74
   3  -6  -2   12.45    3.00
   3  -6  -1  363.45   17.30
   3  -6  -1  414.80   19.77
   3  -6  -1  422.09   18.82
   3  -6  -1  372.10   16.45
   3  -6   0  624.08   23.13
   3  -6   0  579.01   24.76
   3  -6   0  624.77   23.77
   3  -6   0  566.87   21.76
   3  -6   1  290.38   14.03
   3  -6   1  319.49   16.69
   3  -6   1  312.27   14.26
   3  -6   1  286.53   14.39
   3  -6   2  191.69   10.33
   3  -6   2  213.22   11.24
   3  -6   2  194.48   11.05
   3  -6   3   97.62    6.71
   3  -6   3  102.83    8.95
   3  -6   3   96.23    7.40
   3  -6   3   99.53    7.32
   3  -6   4  103.53    6.54
   3  -6   4  104.86    7.17
   3  -6   4  105.65    9.07
   3  -6   4   89.21    7.26
   3  -6   4   99.66    7.06
   3  -6   5   87.92    6.39
   3  -6   5   79.79    5.27
   3  -6   5   80.97    6.16
   3  -6   5   79.96    7.82
   3  -6   5   79.66    6.82
   3  -6   6  356.51   14.56
   3  -6   6  356.30   12.40
   3  -6   6  357.47   18.08
   3  -6   6  376.19   14.86
   3  -6   6  342.30   16.09
   3  -6   7  539.88   18.95
   3  -6   7  533.23   14.95
   3  -6   7  518.53   23.04
   3  -6   7  507.56   18.65
   3  -6   7  533.01   21.35
   3  -6   8  708.49   23.28
   3  -6   8  722.12   28.51
   3  -6   8  755.66   23.90
   3  -6   8  702.98   26.53
   3  -6   9   26.16    4.21
   3  -6   9   21.90    2.84
   3  -6   9   21.93    3.01
   3  -6   9   18.43    4.15
   3  -6  10  145.22    8.16
   3  -6  10  145.17   11.20
   3  -6  10  162.99    8.46
   3  -6  10  158.78   10.77
   3  -6  11  105.32    9.27
   3  -6  11  128.72    9.82
   3  -6  12  117.51    9.69
   3  -5  -9  199.90   14.85
   3  -5  -9  163.85   11.08
   3  -5  -8  156.12   12.46
   3  -5  -8  144.64   10.02
   3  -5  -7   82.11    8.52
   3  -5  -7   69.34    6.88
   3  -5  -6  102.95    9.23
   3  -5  -6  102.48    8.33
   3  -5  -5  155.36   11.27
   3  -5  -5  155.79   10.63
   3  -5  -5  137.91   10.95
   3  -5  -5  156.61    9.60
   3  -5  -4   17.47    3.00
   3  -5  -4   18.47    3.64
   3  -5  -4   13.34    3.31
   3  -5  -4   16.32    3.20
   3  -5  -3    9.13    2.11
   3  -5  -3   10.70    2.80
   3  -5  -3    8.48    2.58
   3  -5  -3    3.95    1.58
   3  -5  -2   13.59    2.60
   3  -5  -2   11.65    2.74
   3  -5  -2   13.22    2.84
   3  -5  -2   11.97    2.80
   3  -5  -1  522.40   20.67
   3  -5  -1  547.96   21.58
   3  -5  -1  582.29   20.36
   3  -5   0  370.21   15.37
   3  -5   0  356.17   14.69
   3  -5   0  334.28   15.51
   3  -5   1  632.45   21.23
   3  -5   1  572.88   20.86
   3  -5   1  599.27   21.82
   3  -5   2  270.97   11.66
   3  -5   2  256.05   12.15
   3  -5   2  270.54   12.54
   3  -5   3  330.48   13.99
   3  -5   3  324.17   12.71
   3  -5   3  354.07   14.58
   3  -5   4  168.37    9.05
   3  -5   4  177.69    8.01
   3  -5   4  175.85    8.77
   3  -5   4  166.39    9.54
   3  -5   5   29.38    3.82
   3  -5   5   31.46    2.70
   3  -5   5   35.70    3.78
   3  -5   5   35.34    3.52
   3  -5   6 1191.35   30.12
   3  -5   6 1223.77   34.83
   3  -5   6 1184.22   33.54
   3  -5   6 1211.55   38.62
   3  -5   6 1161.30   36.09
   3  -5   7   48.80    4.42
   3  -5   7   45.16    5.32
   3  -5   7   50.57    4.08
   3  -5   7   48.80    5.15
   3  -5   8  878.62   28.04
   3  -5   8  918.60   31.95
   3  -5   8  949.58   27.00
   3  -5   8  939.78   30.70
   3  -5   9  964.59   29.57
   3  -5   9  971.13   27.66
   3  -5   9 1043.33   32.70
   3  -5  10   31.74    4.50
   3  -5  10   25.28    4.81
   3  -5  10   35.80    3.18
   3  -5  10   31.11    4.56
   3  -5  10   34.99    3.96
   3  -5  11  166.02   10.76
   3  -5  11  176.16    9.55
   3  -5  11  163.49   12.79
   3  -5  11  180.40    9.55
   3  -5  11  160.65   10.55
   3  -5  12  202.58   10.69
   3  -5  12  209.60   12.36
   3  -4 -10   27.54    5.31
   3  -4 -10   19.78    3.74
   3  -4  -9  169.41   12.84
   3  -4  -9  178.34   11.24
   3  -4  -9  173.62    8.88
   3  -4  -9  170.64    9.67
   3  -4  -8 1032.54   36.23
   3  -4  -8  893.29   30.44
   3  -4  -7  570.49   23.97
   3  -4  -7  530.69   20.68
   3  -4  -7  492.74   23.11
   3  -4  -6 1292.33   41.03
   3  -4  -6 1195.80   37.73
   3  -4  -6 1194.85   40.64
   3  -4  -5  293.32   15.17
   3  -4  -5  326.38   14.87
   3  -4  -5  304.78   15.68
   3  -4  -5  273.82   13.17
   3  -4  -4  307.00   15.37
   3  -4  -4  298.39   13.30
   3  -4  -3   52.11    5.38
   3  -4  -3   64.01    6.10
   3  -4  -3   58.65    5.16
   3  -4  -2 1314.50   40.41
   3  -4  -2 1323.98   39.07
   3  -4  -1 1008.86   30.62
   3  -4  -1  942.10   29.39
   3  -4  -1 1021.00   31.52
   3  -4   0  749.78   24.28
   3  -4   0  785.02   25.49
   3  -4   1 1541.58   43.21
   3  -4   1 1539.60   42.38
   3  -4   1 1529.01   41.87
   3  -4   2  313.26   11.99
   3  -4   2  311.77   12.95
   3  -4   3  471.47   15.17
   3  -4   3  478.32   16.99
   3  -4   3  462.02   16.91
   3  -4   4  421.62   13.19
   3  -4   4  419.86   15.60
   3  -4   4  430.86   14.27
   3  -4   4  409.93   15.71
   3  -4   5  126.68    4.90
   3  -4   5  129.55    7.39
   3  -4   5  134.17    6.40
   3  -4   5  120.11    7.40
   3  -4   6  389.59   15.06
   3  -4   6  403.67   13.33
   3  -4   6  426.11   16.12
   3  -4   7  364.10   14.22
   3  -4   7  356.86   11.88
   3  -4   7  338.48   14.47
   3  -4   8  110.75    7.71
   3  -4   8   95.39    6.53
   3  -4   8   98.47    4.97
   3  -4   8   95.28    7.39
   3  -4   8   96.36    6.86
   3  -4   9   39.28    5.39
   3  -4   9   34.10    4.31
   3  -4   9   34.30    4.44
   3  -4   9   37.38    2.75
   3  -4   9   36.96    4.00
   3  -4   9   34.77    4.15
   3  -4  10  126.62    9.07
   3  -4  10  141.14   10.90
   3  -4  10  128.41    8.51
   3  -4  10  134.53    8.31
   3  -4  10  137.79    5.62
   3  -4  10  128.01    8.50
   3  -4  11  159.61    9.46
   3  -4  11  153.03   10.29
   3  -4  11  149.90   11.49
   3  -4  11  159.54    9.52
   3  -4  11  154.94    5.69
   3  -4  11  176.74   10.02
   3  -4  11  163.88    9.93
   3  -4  12  351.51   18.98
   3  -4  12  412.29   17.14
   3  -4  12  359.20   13.90
   3  -4  12  384.03   16.67
   3  -4  13  216.69   12.00
   3  -3 -11   48.05    6.76
   3  -3 -11   36.32    5.18
   3  -3 -10  470.14   22.46
   3  -3 -10  482.88   20.48
   3  -3 -10  434.02   14.61
   3  -3  -9  204.36   13.45
   3  -3  -9  207.65   10.09
   3  -3  -9  230.20   12.74
   3  -3  -9  213.36    9.49
   3  -3  -8  120.53    9.61
   3  -3  -8   94.07    7.66
   3  -3  -8  120.84    7.49
   3  -3  -8  109.91    6.48
   3  -3  -8  111.91    9.35
   3  -3  -7  355.41   17.33
   3  -3  -7  370.20   15.04
   3  -3  -7  356.85   17.60
   3  -3  -6 1479.66   45.61
   3  -3  -6 1522.77   46.30
   3  -3  -5  607.13   22.72
   3  -3  -5  578.01   22.63
   3  -3  -4  343.32   15.06
   3  -3  -4  347.70   15.50
   3  -3  -4  311.01   13.31
   3  -3  -3 2822.40   69.25
   3  -3  -3 2905.68   67.70
   3  -3  -2  208.82   10.15
   3  -3  -2  195.19    9.24
   3  -3  -2  188.80   10.15
   3  -3  -1 1352.25   37.97
   3  -3  -1 1244.29   36.60
   3  -3  -1 1342.00   36.50
   3  -3   0 1416.54   39.79
   3  -3   0 1372.06   38.59
   3  -3   0 1479.62   38.96
   3  -3   1  274.55   10.61
   3  -3   1  269.54   11.58
   3  -3   1  291.87   11.24
   3  -3   2  329.38   11.32
   3  -3   2  334.91   12.88
   3  -3   2  303.15   12.01
   3  -3   3 3652.27   83.96
   3  -3   3 3541.99   87.05
   3  -3   3 3419.78   86.25
   3  -3   4  963.05   29.81
   3  -3   4  920.37   27.97
   3  -3   4  982.65   27.91
   3  -3   5 1113.25   32.09
   3  -3   5 1051.62   31.34
   3  -3   6   86.97    6.61
   3  -3   6   72.57    5.32
   3  -3   6   73.76    3.58
   3  -3   6   76.36    5.28
   3  -3   7  287.21   13.53
   3  -3   7  281.18    8.56
   3  -3   7  286.83   11.90
   3  -3   8   15.47    2.51
   3  -3   8   20.67    3.33
   3  -3   8   18.04    1.32
   3  -3   9   16.49    2.63
   3  -3   9   18.95    3.36
   3  -3   9   12.92    2.68
   3  -3   9   14.98    1.01
   3  -3   9   15.13    2.61
   3  -3  10  166.14   10.85
   3  -3  10  180.96   11.45
   3  -3  10  167.08    9.03
   3  -3  10  170.80   10.08
   3  -3  10  170.15    8.27
   3  -3  10  162.34    9.00
   3  -3  11  351.32   13.73
   3  -3  11  354.63   17.51
   3  -3  11  346.97   17.17
   3  -3  11  389.66   16.90
   3  -3  11  371.02   14.97
   3  -3  11  350.95   12.82
   3  -3  12  936.24   34.26
   3  -3  12  902.47   32.64
   3  -3  12 1002.99   33.08
   3  -3  12  970.30   30.06
   3  -3  13  159.27   10.89
   3  -2 -12   48.54    6.65
   3  -2 -12   41.21    5.79
   3  -2 -11   31.36    5.10
   3  -2 -11   29.62    4.69
   3  -2 -10  168.63    6.88
   3  -2 -10  180.39   12.31
   3  -2 -10  177.54   11.40
   3  -2 -10  160.12   11.82
   3  -2 -10  181.77    7.27
   3  -2  -9  343.33   17.31
   3  -2  -9  323.91   16.02
   3  -2  -9  347.35   12.85
   3  -2  -9  342.75   17.35
   3  -2  -9  352.69   12.40
   3  -2  -8  388.98   18.30
   3  -2  -8  430.66   18.02
   3  -2  -8  398.37   18.47
   3  -2  -8  417.65   14.41
   3  -2  -7  102.74    8.03
   3  -2  -7  110.69    7.83
   3  -2  -7   95.31    5.72
   3  -2  -7  101.92    8.07
   3  -2  -6  368.73   16.14
   3  -2  -6  352.03   15.97
   3  -2  -5   74.36    6.08
   3  -2  -5   62.50    5.62
   3  -2  -4   91.98    6.79
   3  -2  -4  154.35    8.65
   3  -2  -3  343.16   13.83
   3  -2  -3  347.41   14.03
   3  -2  -3  328.08   12.80
   3  -2  -2   57.31    4.75
   3  -2  -2   66.87    4.91
   3  -2  -2   62.62    4.47
   3  -2  -1   42.00    3.89
   3  -2  -1   47.06    3.83
   3  -2  -1   42.12    3.49
   3  -2   0   93.09    5.32
   3  -2   0   91.95    5.82
   3  -2   0   94.68    5.31
   3  -2   1    3.63    0.93
   3  -2   1    4.30    1.00
   3  -2   1    5.28    1.36
   3  -2   2 1718.64   43.35
   3  -2   2 1703.61   45.73
   3  -2   2 1776.19   44.71
   3  -2   3  902.77   26.66
   3  -2   3  857.59   25.20
   3  -2   4 2480.12   64.69
   3  -2   4 2479.26   62.60
   3  -2   4 2384.99   60.86
   3  -2   5 3802.80   95.46
   3  -2   5 3714.04   91.16
   3  -2   6 2681.53   69.97
   3  -2   6 2581.34   65.34
   3  -2   7   26.58    3.93
   3  -2   7   24.47    2.61
   3  -2   8   17.17    2.89
   3  -2   8   18.09    3.29
   3  -2   8   20.49    2.47
   3  -2   8   17.84    2.28
   3  -2   9  574.85   23.17
   3  -2   9  595.15   21.62
   3  -2   9  556.56   18.41
   3  -2   9  584.98   18.20
   3  -2  10 1156.43   38.93
   3  -2  10 1188.04   36.07
   3  -2  10 1131.00   32.00
   3  -2  10 1203.18   37.39
   3  -2  10 1159.06   32.69
   3  -2  10 1165.23   31.40
   3  -2  11  227.20    7.77
   3  -2  11  227.74   14.16
   3  -2  11  228.10   11.71
   3  -2  11  225.11   13.00
   3  -2  11  228.65    9.90
   3  -2  11  214.23    7.84
   3  -2  12  378.99   20.27
   3  -2  12  422.91   19.71
   3  -2  12  440.37   15.41
   3  -2  13  243.47   14.70
   3  -1 -12  549.72   24.54
   3  -1 -12  561.90   24.59
   3  -1 -11  125.22    9.85
   3  -1 -11  111.00    9.50
   3  -1 -11  104.01    9.15
   3  -1 -10  545.53   22.51
   3  -1 -10  500.38   21.81
   3  -1 -10  526.17   14.91
   3  -1 -10  502.41   14.69
   3  -1 -10  493.94   21.43
   3  -1  -9  685.41   20.46
   3  -1  -9  761.77   27.08
   3  -1  -9  676.26   25.91
   3  -1  -9  700.96   25.92
   3  -1  -8    9.33    1.54
   3  -1  -8    9.68    2.49
   3  -1  -8   12.60    2.58
   3  -1  -8    7.18    2.06
   3  -1  -7  357.30   16.11
   3  -1  -7  379.97   16.22
   3  -1  -7  405.09   16.60
   3  -1  -7  366.42   13.15
   3  -1  -6  818.97   26.08
   3  -1  -6  776.02   25.51
   3  -1  -6  756.33   25.22
   3  -1  -5  181.84    9.57
   3  -1  -5  176.66    7.95
   3  -1  -5  173.93    9.32
   3  -1  -4 3088.81   78.84
   3  -1  -4 3138.70   76.78
   3  -1  -4 3046.03   78.48
   3  -1  -3 2028.89   52.49
   3  -1  -3 1963.10   52.43
   3  -1  -2 1939.26   52.33
   3  -1  -2 2027.18   53.04
   3  -1  -1 2639.48   66.68
   3  -1  -1 2708.78   67.44
   3  -1  -1 2671.44   66.19
   3  -1   0  356.74   11.63
   3  -1   0  333.82   12.21
   3  -1   1  780.75   24.49
   3  -1   1  766.64   22.72
   3  -1   1  741.07   21.10
   3  -1   2   44.36    4.21
   3  -1   2   40.88    2.83
   3  -1   3 1916.68   53.35
   3  -1   3 2008.76   49.08
   3  -1   4  397.62   15.88
   3  -1   4  364.46   13.27
   3  -1   4  404.11   12.17
   3  -1   5  193.16   10.62
   3  -1   5  208.86    8.78
   3  -1   5  198.03    7.42
   3  -1   6  356.92   15.72
   3  -1   6  334.17   12.23
   3  -1   6  340.99   10.99
   3  -1   7  108.45    8.19
   3  -1   7  106.97    6.39
   3  -1   7  102.34    4.92
   3  -1   7   99.74    5.66
   3  -1   8  205.04   12.05
   3  -1   8  180.14    8.96
   3  -1   8  187.85    7.41
   3  -1   8  185.70    8.03
   3  -1   9  306.20   10.94
   3  -1   9  306.82   12.37
   3  -1   9  318.17   16.39
   3  -1   9  333.12   15.58
   3  -1   9  296.40   10.45
   3  -1  10  379.09   14.11
   3  -1  10  399.12   19.70
   3  -1  10  397.18   11.85
   3  -1  10  383.61   11.78
   3  -1  10  397.29   18.32
   3  -1  10  390.11   12.63
   3  -1  11  253.31   10.41
   3  -1  11  281.90   16.68
   3  -1  11  271.57   15.15
   3  -1  11  269.30    9.46
   3  -1  12  206.14   14.77
   3  -1  12  230.83   14.42
   3   0 -13   32.36    5.35
   3   0 -12  143.10   10.77
   3   0 -12  129.52    9.88
   3   0 -11   91.28    8.00
   3   0 -11   85.39    8.26
   3   0 -11   98.70    8.06
   3   0 -10  640.40   24.42
   3   0 -10  608.36   25.13
   3   0 -10  630.95   17.75
   3   0 -10  616.18   23.41
   3   0  -9  153.46    9.77
   3   0  -9  144.02   10.05
   3   0  -9  133.19    6.47
   3   0  -9  132.48    8.72
   3   0  -8  126.73    8.72
   3   0  -8  142.45    6.88
   3   0  -8  136.33    9.40
   3   0  -8  147.23    8.85
   3   0  -7   14.87    2.60
   3   0  -7   17.33    2.21
   3   0  -7   19.50    3.22
   3   0  -7   14.90    2.59
   3   0  -6  909.12   28.83
   3   0  -6  872.03   29.07
   3   0  -6  956.82   28.22
   3   0  -6  929.79   26.42
   3   0  -5  376.56   14.99
   3   0  -5  389.22   15.48
   3   0  -5  390.72   13.67
   3   0  -5  410.16   14.66
   3   0  -4 7799.03  188.63
   3   0  -4 7797.22  189.58
   3   0  -4 8298.87  190.65
   3   0  -3 4548.93  115.72
   3   0  -3 4582.75  114.99
   3   0  -2 1860.24   46.95
   3   0  -2 1752.30   46.67
   3   0  -1 3537.36   91.40
   3   0  -1 3591.62   93.47
   3   0   0   14.11    2.30
   3   0   0   13.63    1.95
   3   0   0   14.07    1.90
   3   0   1   96.24    6.45
   3   0   1  106.05    5.77
   3   0   1  103.41    4.62
   3   0   2 1566.61   43.64
   3   0   2 1646.29   41.60
   3   0   2 1525.87   38.65
   3   0   3 2178.76   56.84
   3   0   3 2059.37   53.33
   3   0   4  793.99   26.53
   3   0   4  805.48   23.53
   3   0   4  793.29   20.34
   3   0   5 2677.30   70.79
   3   0   5 2647.16   62.34
   3   0   5 2603.67   66.07
   3   0   6   32.49    4.38
   3   0   6   33.46    1.80
   3   0   6   37.37    3.30
   3   0   7    3.90    1.04
   3   0   7    2.55    0.97
   3   0   7    4.36    1.88
   3   0   8  631.11   17.60
   3   0   8  654.65   25.61
   3   0   8  640.02   19.13
   3   0   8  647.36   24.17
   3   0   8  621.31   15.75
   3   0   9  248.46   14.75
   3   0   9  234.24    8.70
   3   0   9  224.50   13.23
   3   0  10  124.86   10.63
   3   0  10  115.95    9.53
   3   0  11   21.60    4.20
   3   0  11   29.48    5.79
   3   0  12  159.21   12.40
   3   1 -13   26.47    4.97
   3   1 -12  687.56   28.91
   3   1 -12  683.94   25.21
   3   1 -11  876.38   22.60
   3   1 -11  910.00   33.65
   3   1 -11  870.27   29.07
   3   1 -10  211.29   13.53
   3   1 -10  240.74    9.25
   3   1 -10  239.11   11.71
   3   1  -9    3.21    1.79
   3   1  -9    1.50    1.07
   3   1  -9    2.48    0.85
   3   1  -8   36.98    4.82
   3   1  -8   36.16    3.40
   3   1  -8   31.48    3.50
   3   1  -7  147.82    9.70
   3   1  -7  157.65    7.89
   3   1  -7  162.66    8.20
   3   1  -6  255.89   10.64
   3   1  -6  271.01   12.94
   3   1  -6  251.52   10.50
   3   1  -5  193.40    8.30
   3   1  -5  162.86    8.19
   3   1  -5  183.52    9.88
   3   1  -4  257.15   10.79
   3   1  -4  278.76   10.28
   3   1  -4  266.06   11.92
   3   1  -3 1123.67   32.87
   3   1  -3 1157.35   33.76
   3   1  -2   32.27    3.17
   3   1  -2   27.10    2.93
   3   1  -2   31.57    2.80
   3   1  -1   46.10    3.84
   3   1  -1   55.30    4.51
   3   1  -1   50.94    3.86
   3   1  -1   53.16    3.58
   3   1   0  398.95   14.23
   3   1   0  398.55   14.97
   3   1   0  397.55   12.47
   3   1   1 2538.75   64.71
   3   1   1 2558.53   66.48
   3   1   1 2555.32   61.85
   3   1   2  363.47   13.12
   3   1   2  341.47   14.34
   3   1   2  337.54   10.38
   3   1   3   89.64    5.67
   3   1   3  100.51    7.13
   3   1   3   99.87    4.09
   3   1   4  207.88    9.37
   3   1   4  209.98   11.36
   3   1   4  220.71    7.04
   3   1   5 1011.99   30.29
   3   1   5 1120.86   35.03
   3   1   5 1083.15   26.90
   3   1   6  453.61   20.06
   3   1   6  484.23   16.47
   3   1   6  475.65   13.23
   3   1   7  957.67   33.02
   3   1   7  889.93   23.37
   3   1   7  943.16   26.73
   3   1   7  859.99   30.66
   3   1   8  637.31   26.36
   3   1   8  625.67   17.29
   3   1   8  621.25   19.56
   3   1   8  698.11   26.04
   3   1   9   22.45    1.93
   3   1   9   27.79    4.65
   3   1   9   25.74    2.07
   3   1   9   23.87    4.59
   3   1   9   28.78    2.42
   3   1  10  532.54   15.21
   3   1  10  536.06   15.25
   3   1  11  368.75   20.13
   3   2 -13    5.33    2.67
   3   2 -12  158.67   12.50
   3   2 -11  217.04    9.17
   3   2 -11  252.37   15.50
   3   2 -11  231.17   10.94
   3   2 -10  552.36   24.17
   3   2 -10  558.65   18.83
   3   2 -10  514.54   17.80
   3   2  -9   64.26    4.92
   3   2  -9   71.55    4.98
   3   2  -8    3.21    1.19
   3   2  -8    4.97    1.93
   3   2  -8    3.43    0.90
   3   2  -7   64.16    6.33
   3   2  -7   73.14    5.43
   3   2  -7   64.33    4.36
   3   2  -6   94.14    7.42
   3   2  -6   93.40    6.30
   3   2  -6   97.19    5.26
   3   2  -5  918.78   25.03
   3   2  -5  881.65   29.46
   3   2  -5  898.46   27.66
   3   2  -4    7.29    1.89
   3   2  -4    5.86    1.49
   3   2  -4    6.78    1.18
   3   2  -4    7.01    1.61
   3   2  -3  112.76    6.53
   3   2  -3  124.21    7.44
   3   2  -3  115.29    6.93
   3   2  -3  108.03    5.51
   3   2  -3  135.90    6.98
   3   2  -2 3011.05   74.68
   3   2  -2 2890.45   74.62
   3   2  -2 3117.39   75.54
   3   2  -2 2822.48   73.26
   3   2  -1   59.55    4.70
   3   2  -1   48.80    3.97
   3   2  -1   48.21    4.32
   3   2  -1   49.59    3.75
   3   2   0   97.44    5.53
   3   2   0  103.91    6.69
   3   2   0   94.31    6.27
   3   2   0  103.14    5.42
   3   2   1   28.70    2.61
   3   2   1   28.17    3.50
   3   2   1   36.10    3.65
   3   2   1   30.11    2.66
   3   2   2 1237.55   31.64
   3   2   2 1246.47   32.33
   3   2   3 1708.16   46.67
   3   2   3 1611.10   43.73
   3   2   3 1651.61   40.75
   3   2   4  108.86    8.08
   3   2   4   97.00    5.06
   3   2   4  103.94    6.63
   3   2   5   94.42    7.97
   3   2   5   91.95    4.84
   3   2   5   84.99    5.98
   3   2   5   92.30    7.37
   3   2   6  168.36    7.17
   3   2   6  174.96    8.84
   3   2   6  166.92   10.78
   3   2   7  172.22   12.38
   3   2   7  169.53    7.59
   3   2   7  178.50   11.70
   3   2   7  186.25    8.98
   3   2   8  818.76   24.47
   3   2   8  753.85   31.33
   3   2   8  793.74   23.30
   3   2   9  216.99    8.66
   3   2   9  214.45    9.02
   3   2   9  215.22   14.27
   3   2  10  221.58    9.28
   3   2  10  232.23   15.43
   3   2  11  319.93   19.50
   3   3 -13   97.10   10.07
   3   3 -12   48.84    4.07
   3   3 -11  457.55   16.79
   3   3 -11  453.78   22.76
   3   3 -10   68.74    7.82
   3   3 -10   75.68    4.68
   3   3 -10   75.59    5.80
   3   3  -9    9.09    2.55
   3   3  -9    7.84    1.32
   3   3  -9    9.56    2.09
   3   3  -8  602.77   25.31
   3   3  -8  628.34   22.01
   3   3  -8  646.07   18.48
   3   3  -7   26.73    3.51
   3   3  -7   24.47    4.08
   3   3  -7   28.35    2.34
   3   3  -6 1825.79   46.01
   3   3  -6 1755.19   53.38
   3   3  -6 1905.94   51.28
   3   3  -6 1877.50   51.24
   3   3  -5 2081.79   50.64
   3   3  -5 1964.50   57.03
   3   3  -5 1995.27   54.61
   3   3  -5 2008.50   55.40
   3   3  -4 1261.53   34.72
   3   3  -4 1185.35   37.58
   3   3  -4 1243.03   32.71
   3   3  -4 1185.84   36.78
   3   3  -3  602.05   19.05
   3   3  -3  537.32   20.25
   3   3  -3  566.08   19.21
   3   3  -3  544.62   20.19
   3   3  -2 1181.02   32.90
   3   3  -2 1097.80   33.32
   3   3  -2 1125.91   32.37
   3   3  -2 1108.78   34.12
   3   3  -1 1756.75   48.91
   3   3  -1 1829.39   48.76
   3   3  -1 1870.75   48.24
   3   3  -1 1764.30   50.11
   3   3   0 1176.30   34.28
   3   3   0 1121.54   32.11
   3   3   0 1116.05   34.27
   3   3   1 2348.87   57.69
   3   3   1 2206.66   61.11
   3   3   1 2231.74   58.06
   3   3   1 2237.01   60.86
   3   3   2   35.21    3.30
   3   3   2   36.36    4.10
   3   3   2   29.59    3.93
   3   3   3    5.83    1.71
   3   3   3    3.36    1.55
   3   3   3    4.32    1.49
   3   3   3    5.79    1.40
   3   3   4  790.68   29.14
   3   3   4  815.97   24.36
   3   3   4  829.47   26.87
   3   3   4  798.57   28.06
   3   3   5  211.02   13.24
   3   3   5  222.03    9.74
   3   3   5  229.17   13.04
   3   3   5  228.29   11.37
   3   3   6    5.63    2.24
   3   3   6    6.32    2.46
   3   3   6    8.85    1.83
   3   3   6    4.92    1.53
   3   3   7  963.61   29.98
   3   3   7  935.73   36.06
   3   3   7  994.84   28.91
   3   3   7  923.34   34.62
   3   3   8  120.56    7.30
   3   3   8  113.29    6.88
   3   3   8  121.64   10.67
   3   3   9   79.99    5.73
   3   3   9   78.57    8.74
   3   3  10    3.59    2.04
   3   4 -12  440.86   17.33
   3   4 -11  594.77   21.74
   3   4 -11  556.47   26.70
   3   4 -10  186.18   10.74
   3   4  -9 1368.79   46.55
   3   4  -9 1395.70   41.74
   3   4  -8 1240.05   42.24
   3   4  -8 1270.77   38.96
   3   4  -8 1236.07   29.86
   3   4  -8 1239.42   38.36
   3   4  -7  233.87   14.22
   3   4  -7  235.99   12.55
   3   4  -7  251.08    7.55
   3   4  -6 1964.36   48.68
   3   4  -6 1911.30   58.16
   3   4  -6 1996.90   56.39
   3   4  -5  161.57    7.47
   3   4  -5  157.90    6.32
   3   4  -5  138.66    9.95
   3   4  -5  137.19    8.50
   3   4  -5  160.86    9.89
   3   4  -4  239.90   10.16
   3   4  -4  227.42   12.52
   3   4  -4  238.12   11.54
   3   4  -4  236.84   12.44
   3   4  -3  218.33   10.21
   3   4  -3  260.41   12.72
   3   4  -3  223.90   11.07
   3   4  -3  237.23   12.47
   3   4  -2  676.98   22.16
   3   4  -2  678.96   23.31
   3   4  -2  622.44   21.90
   3   4  -2  650.70   23.87
   3   4  -1   58.15    5.16
   3   4  -1   54.23    4.91
   3   4  -1   60.61    5.06
   3   4  -1   52.11    5.40
   3   4   0   78.65    6.31
   3   4   0   77.55    5.71
   3   4   0   67.82    5.42
   3   4   0   67.30    6.14
   3   4   1 1366.06   39.73
   3   4   1 1300.42   36.67
   3   4   1 1191.45   37.30
   3   4   1 1232.13   38.92
   3   4   2  321.77   15.69
   3   4   2  327.53   13.49
   3   4   2  308.30   14.57
   3   4   2  342.51   15.52
   3   4   3   52.50    6.08
   3   4   3   52.98    4.76
   3   4   3   63.18    6.14
   3   4   3   65.97    6.16
   3   4   4    4.37    1.69
   3   4   4    3.55    1.73
   3   4   4    5.05    1.49
   3   4   4    7.74    2.14
   3   4   5  100.56    7.70
   3   4   5   95.67    9.17
   3   4   5   94.47    6.59
   3   4   5   86.93    8.26
   3   4   6   17.78    3.15
   3   4   6   16.81    4.06
   3   4   6    8.91    3.19
   3   4   6   18.32    2.85
   3   4   7  506.20   19.65
   3   4   7  482.47   18.47
   3   4   7  476.89   23.26
   3   4   8  153.18    9.18
   3   4   8  156.65    9.15
   3   4   8  166.64   13.30
   3   4   9  200.98   10.77
   3   4   9  205.39   15.49
   3   5 -12   85.47    7.27
   3   5 -11   67.90    6.54
   3   5 -10   44.73    5.50
   3   5  -9   52.73    5.97
   3   5  -9   68.52    6.78
   3   5  -8  824.12   29.84
   3   5  -8  817.52   32.53
   3   5  -8  848.26   29.62
   3   5  -7  177.32   12.74
   3   5  -7  202.71   11.55
   3   5  -7  194.60   12.02
   3   5  -6   77.62    3.43
   3   5  -6   73.26    7.61
   3   5  -6   57.96    5.92
   3   5  -6   76.71    3.43
   3   5  -6   69.35    6.92
   3   5  -5  514.43   16.93
   3   5  -5  522.77   22.23
   3   5  -5  493.87   19.94
   3   5  -5  515.13   15.16
   3   5  -5  490.75   15.19
   3   5  -5  517.28   21.59
   3   5  -4   23.79    2.96
   3   5  -4   20.22    3.18
   3   5  -4   21.84    2.39
   3   5  -4   22.06    3.76
   3   5  -3   21.73    2.61
   3   5  -3   18.74    2.93
   3   5  -3   24.82    3.58
   3   5  -3   20.15    3.67
   3   5  -2  622.73   21.76
   3   5  -2  596.61   22.27
   3   5  -2  580.93   20.16
   3   5  -1 1225.21   37.45
   3   5  -1 1205.58   37.06
   3   5  -1 1283.14   36.42
   3   5  -1 1168.12   39.22
   3   5   0 3549.82   88.76
   3   5   0 3229.68   86.24
   3   5   0 3288.84   86.35
   3   5   0 3359.79   89.68
   3   5   1  347.82   16.81
   3   5   1  365.68   15.53
   3   5   1  369.05   16.41
[truncated: 106,724 more chars]
