# Supplementary material
Source: MDPI journal article supplement (https://www.mdpi.com/2304-6740/7/4/44)
Supplement: s1 [file s1 › MAB3.cif]

data_MAB3

#2017ncs0216s

_audit_creation_date              2017-08-03
_audit_creation_method
;
Olex2 1.2-alpha
(compiled 2017.07.20 svn.r3457 for OlexSys, GUI svn.r5370)
;
_shelx_SHELXL_version_number      '2014/7'
_publ_contact_author_address      ?
_publ_contact_author_email        ?
_publ_contact_author_id_orcid     ?
_publ_contact_author_name         ''
_publ_contact_author_phone        ?
_publ_section_references
;
Dolomanov, O.V., Bourhis, L.J., Gildea, R.J, Howard, J.A.K. & Puschmann, H.
 (2009), J. Appl. Cryst. 42, 339-341.

Sheldrick, G.M. (2015). Acta Cryst. A71, 3-8.

Sheldrick, G.M. (2015). Acta Cryst. C71, 3-8.
;
_chemical_name_common             ?
_chemical_name_systematic         ?
_chemical_formula_moiety
'C3 H17 B12 N2 O24 Zn, 7(H2 O), 1.5(C3 H12 N2)'
_chemical_formula_sum             'C7.50 H49 B12 N5 O31 Zn'
_chemical_formula_weight          900.60
_chemical_melting_point           ?
_chemical_oxdiff_formula          'C34 H24 F N3 O3'
_chemical_oxdiff_usercomment      MAB/M1/ZntriB
loop_
  _atom_type_symbol
  _atom_type_description
  _atom_type_scat_dispersion_real
  _atom_type_scat_dispersion_imag
  _atom_type_scat_source
 'C' 'C' 0.0033 0.0016 'International Tables Vol C Tables 4.2.6.8 and 6.1.1.4'
 'H' 'H' 0.0000 0.0000 'International Tables Vol C Tables 4.2.6.8 and 6.1.1.4'
 'B' 'B' 0.0013 0.0007 'International Tables Vol C Tables 4.2.6.8 and 6.1.1.4'
 'N' 'N' 0.0061 0.0033 'International Tables Vol C Tables 4.2.6.8 and 6.1.1.4'
 'O' 'O' 0.0106 0.0060 'International Tables Vol C Tables 4.2.6.8 and 6.1.1.4'
 'Zn' 'Zn' 0.2839 1.4301 'International Tables Vol C Tables 4.2.6.8 and 6.1.1.4'

_shelx_space_group_comment
;
The symmetry employed for this shelxl refinement is uniquely defined
by the following loop, which should always be used as a source of
symmetry information in preference to the above space-group names.
They are only intended as comments.
;
_space_group_crystal_system       'triclinic'
_space_group_IT_number            2
_space_group_name_H-M_alt         'P -1'
_space_group_name_Hall            '-P 1'
loop_
  _space_group_symop_operation_xyz
 'x, y, z'
 '-x, -y, -z'

_cell_length_a                    9.3681(2)
_cell_length_b                    10.6910(2)
_cell_length_c                    19.2746(4)
_cell_angle_alpha                 82.954(2)
_cell_angle_beta                  76.156(2)
_cell_angle_gamma                 68.655(2)
_cell_volume                      1744.44(7)
_cell_formula_units_Z             2
_cell_measurement_reflns_used     24816
_cell_measurement_temperature     100(2)
_cell_measurement_theta_max       30.0180
_cell_measurement_theta_min       2.8160
_shelx_estimated_absorpt_T_max    0.937
_shelx_estimated_absorpt_T_min    0.873
_exptl_absorpt_coefficient_mu     0.821
_exptl_absorpt_correction_T_max   1.00000
_exptl_absorpt_correction_T_min   0.90992
_exptl_absorpt_correction_type    multi-scan
_exptl_absorpt_process_details
;
CrysAlisPro 1.171.39.27b (Rigaku Oxford Diffraction, 2015)
Empirical absorption correction using spherical harmonics,
 implemented in SCALE3 ABSPACK scaling algorithm.
;
_exptl_absorpt_special_details    ?
_exptl_crystal_colour             colourless
_exptl_crystal_colour_primary     colourless
_exptl_crystal_density_diffrn     1.715
_exptl_crystal_density_meas       ?
_exptl_crystal_density_method     ?
_exptl_crystal_description        prism
_exptl_crystal_F_000              934
_exptl_crystal_recrystallization_method
'The material was recrystallised from --- by as supplied'
_exptl_crystal_size_max           0.17
_exptl_crystal_size_mid           0.14
_exptl_crystal_size_min           0.08
_exptl_transmission_factor_max    ?
_exptl_transmission_factor_min    ?
_diffrn_reflns_av_R_equivalents   0.0389
_diffrn_reflns_av_unetI/netI      0.0263
_diffrn_reflns_Laue_measured_fraction_full 0.998
_diffrn_reflns_Laue_measured_fraction_max 0.998
_diffrn_reflns_limit_h_max        12
_diffrn_reflns_limit_h_min        -11
_diffrn_reflns_limit_k_max        13
_diffrn_reflns_limit_k_min        -13
_diffrn_reflns_limit_l_max        25
_diffrn_reflns_limit_l_min        -25
_diffrn_reflns_number             38867
_diffrn_reflns_point_group_measured_fraction_full 0.998
_diffrn_reflns_point_group_measured_fraction_max 0.998
_diffrn_reflns_theta_full         25.242
_diffrn_reflns_theta_max          27.484
_diffrn_reflns_theta_min          2.532
_diffrn_ambient_environment       N~2~
_diffrn_ambient_temperature       100(2)
_diffrn_detector                  'CCD area detector'
_diffrn_detector_area_resol_mean  28.5714
_diffrn_detector_type             'Rigaku HG Saturn724+ (2x2 bin mode)'
_diffrn_measured_fraction_theta_full 0.998
_diffrn_measured_fraction_theta_max 0.998
_diffrn_measurement_details
;
List of Runs (angles in degrees, time in seconds):

  # Type    Start    End  Width  t~exp~   \w     \q     \k     \f   Frames
--------------------------------------------------------------------------
  1  \w    -39.00  77.00   1.00    1.00    --  -11.90  38.00 120.00  116
  2  \w   -101.00  22.00   1.00    1.00    --  -11.90 -72.00-180.00  123
  3  \w   -101.00  19.00   1.00    1.00    --  -11.90 -57.00 -60.00  120
  4  \w   -101.00  19.00   1.00    1.00    --  -11.90 -57.00   0.00  120
  5  \w   -101.00  15.00   1.00    1.00    --  -11.90 -38.00 150.00  116
  6  \w    -46.00  22.00   1.00    1.00    --  -11.90  72.00   0.00   68
  7  \w    -43.00  77.00   1.00    1.00    --  -11.90  57.00 -90.00  120
;
_diffrn_measurement_device        'four-circle \k goniometer'
_diffrn_measurement_device_type
'Rigaku FRE+ equipped with HF Varimax confocal mirrors and an AFC12 goniometer and HG Saturn 724+ detector'
_diffrn_measurement_method        'profile data from \w-scans'
_diffrn_measurement_specimen_support 'MiTeGen MicroLoop'
_diffrn_orient_matrix_type
'CrysAlisPro convention (1999,Acta A55,543-557)'
_diffrn_orient_matrix_UB_11       0.0226431000
_diffrn_orient_matrix_UB_12       -0.0460093000
_diffrn_orient_matrix_UB_13       0.0285423000
_diffrn_orient_matrix_UB_21       -0.0475267000
_diffrn_orient_matrix_UB_22       0.0501438000
_diffrn_orient_matrix_UB_23       0.0249025000
_diffrn_orient_matrix_UB_31       -0.0643677000
_diffrn_orient_matrix_UB_32       -0.0212274000
_diffrn_orient_matrix_UB_33       0.0019706000
_diffrn_radiation_collimation     0.2
_diffrn_radiation_monochromator   'Confocal mirrors, HF Varimax'
_diffrn_radiation_probe           x-ray
_diffrn_radiation_type            MoK\a
_diffrn_radiation_wavelength      0.71075
_diffrn_radiation_xray_symbol     K-L~3~
_diffrn_source                    'Rotating Anode'
_diffrn_source_current            55.0
_diffrn_source_power              2.475
_diffrn_source_target             Mo
_diffrn_source_type               'Rigaku FRE+'
_diffrn_source_voltage            45.0
_reflns_Friedel_coverage          0.000
_reflns_Friedel_fraction_full     .
_reflns_Friedel_fraction_max      .
_reflns_number_gt                 7654
_reflns_number_total              7958
_reflns_odcompleteness_completeness 99.85
_reflns_odcompleteness_iscentric  1
_reflns_odcompleteness_theta      27.42
_reflns_special_details
;
 Reflections were merged by SHELXL according to the crystal
 class for the calculation of statistics and refinement.
 
 _reflns_Friedel_fraction is defined as the number of unique
 Friedel pairs measured divided by the number that would be
 possible theoretically, ignoring centric projections and
 systematic absences.
;
_reflns_threshold_expression      'I > 2\s(I)'
_computing_cell_refinement        'CrysAlisPro 1.171.39.27b (Rigaku OD, 2015)'
_computing_data_collection        'CrysAlisPro 1.171.39.27b (Rigaku OD, 2015)'
_computing_data_reduction         'CrysAlisPro 1.171.39.27b (Rigaku OD, 2015)'
_computing_molecular_graphics     'Olex2 (Dolomanov et al., 2009)'
_computing_publication_material   'Olex2 (Dolomanov et al., 2009)'
_computing_structure_refinement   'ShelXL (Sheldrick, 2015)'
_computing_structure_solution     'ShelXT (Sheldrick, 2015)'
_refine_diff_density_max          0.869
_refine_diff_density_min          -0.733
_refine_diff_density_rms          0.086
_refine_ls_extinction_coef        .
_refine_ls_extinction_method      none
_refine_ls_goodness_of_fit_ref    1.191
_refine_ls_hydrogen_treatment     constr
_refine_ls_matrix_type            full
_refine_ls_number_parameters      590
_refine_ls_number_reflns          7958
_refine_ls_number_restraints      0
_refine_ls_R_factor_all           0.0439
_refine_ls_R_factor_gt            0.0425
_refine_ls_restrained_S_all       1.191
_refine_ls_shift/su_max           0.001
_refine_ls_shift/su_mean          0.000
_refine_ls_structure_factor_coef  Fsqd
_refine_ls_weighting_details
'w=1/[\s^2^(Fo^2^)+(0.0139P)^2^+5.3794P] where P=(Fo^2^+2Fc^2^)/3'
_refine_ls_weighting_scheme       calc
_refine_ls_wR_factor_gt           0.1046
_refine_ls_wR_factor_ref          0.1053
_refine_special_details           ?
_olex2_refinement_description
;
1. Fixed Uiso
 At 1.2 times of:
  All C(H,H) groups, All N(H,H) groups, All N(H,H,H) groups
 At 1.5 times of:
  All O(H) groups, All O(H,H) groups
2. Others
 Sof(O51)=Sof(H51A)=Sof(H51B)=1-FVAR(1)
 Sof(O52)=Sof(H52A)=Sof(H52B)=FVAR(1)
 Sof(O41)=Sof(H41A)=Sof(H41B)=1-FVAR(2)
 Sof(O42)=Sof(H42A)=Sof(H42B)=FVAR(2)
 Fixed Sof: N21(0.5) H21A(0.5) H21B(0.5) H21C(0.5) N22(0.5) H22A(0.5)
 H22B(0.5) H22C(0.5) C21(0.5) H21D(0.5) H21E(0.5) C22(0.5) H22D(0.5) H22E(0.5)
 C23(0.5) H23A(0.5) H23B(0.5)
3.a Free rotating group:
 O31(H31A,H31B), O32(H32A,H32B), O33(H33A,H33B), O34(H34A,H34B), O35(H35A,
 H35B), O42(H42A,H42B), O52(H52A,H52B), O41(H41A,H41B), O51(H51A,H51B)
3.b Secondary CH2 refined with riding coordinates:
 N1(H1A,H1B), C1(H1C,H1D), C2(H2D,H2E), C3(H3A,H3B), C11(H11D,H11E), C12(H12D,
 H12E), C13(H13A,H13B), C21(H21D,H21E), C22(H22D,H22E), C23(H23A,H23B)
3.c Idealised Me refined as rotating group:
 N2(H2A,H2B,H2C), N11(H11A,H11B,H11C), N12(H12A,H12B,H12C), N21(H21A,H21B,
 H21C), N22(H22A,H22B,H22C)
3.d Idealised tetrahedral OH refined as rotating group:
 O19(H19), O20(H20), O21(H21), O22(H22), O23(H23), O24(H24)
;
_atom_sites_solution_hydrogens    mixed
_atom_sites_solution_primary      dual
_atom_sites_solution_secondary    ?
loop_
  _atom_site_label
  _atom_site_type_symbol
  _atom_site_fract_x
  _atom_site_fract_y
  _atom_site_fract_z
  _atom_site_U_iso_or_equiv
  _atom_site_adp_type
  _atom_site_occupancy
  _atom_site_site_symmetry_order
  _atom_site_calc_flag
  _atom_site_refinement_flags_posn
  _atom_site_refinement_flags_adp
  _atom_site_refinement_flags_occupancy
  _atom_site_disorder_assembly
  _atom_site_disorder_group
 Zn1 Zn 0.30835(3) 0.61587(3) 0.30155(2) 0.00798(8) Uani 1 1 d . . . . .
 O1 O 0.1308(2) 0.77434(18) 0.28120(10) 0.0093(3) Uani 1 1 d . . . . .
 O2 O 0.2767(2) 0.78396(18) 0.15942(9) 0.0093(3) Uani 1 1 d . . . . .
 O3 O 0.4586(2) 0.58674(17) 0.20966(9) 0.0086(3) Uani 1 1 d . . . . .
 O4 O 0.4025(2) 0.38372(18) 0.20235(9) 0.0092(3) Uani 1 1 d . . . . .
 O5 O 0.2396(2) 0.45907(18) 0.31769(10) 0.0097(4) Uani 1 1 d . . . . .
 O6 O -0.0043(2) 0.61678(18) 0.28973(9) 0.0092(3) Uani 1 1 d . . . . .
 O7 O -0.1409(2) 0.85023(18) 0.27119(10) 0.0107(4) Uani 1 1 d . . . . .
 O8 O 0.0306(2) 0.95742(18) 0.19901(10) 0.0121(4) Uani 1 1 d . . . . .
 O9 O 0.2545(2) 0.94270(18) 0.24209(10) 0.0114(4) Uani 1 1 d . . . . .
 O10 O 0.5085(2) 0.79519(18) 0.18710(10) 0.0097(4) Uani 1 1 d . . . . .
 O11 O 0.5247(2) 0.67071(18) 0.08813(9) 0.0106(4) Uani 1 1 d . . . . .
 O12 O 0.5997(2) 0.43362(18) 0.11237(10) 0.0109(4) Uani 1 1 d . . . . .
 O13 O 0.6455(2) 0.37084(18) 0.23050(10) 0.0107(4) Uani 1 1 d . . . . .
 O14 O 0.4790(2) 0.26813(18) 0.31026(10) 0.0104(4) Uani 1 1 d . . . . .
 O15 O 0.2662(2) 0.24629(18) 0.27284(10) 0.0101(4) Uani 1 1 d . . . . .
 O16 O 0.0129(2) 0.39240(18) 0.32630(10) 0.0113(4) Uani 1 1 d . . . . .
 O17 O 0.0145(2) 0.53446(18) 0.41149(10) 0.0113(4) Uani 1 1 d . . . . .
 O18 O -0.0729(2) 0.76977(18) 0.38408(10) 0.0115(4) Uani 1 1 d . . . . .
 O19 O -0.2298(2) 1.02818(19) 0.18806(10) 0.0140(4) Uani 1 1 d . . . . .
 H19 H -0.3112 1.0086 0.2034 0.021 Uiso 1 1 calc GR . . . .
 O20 O 0.4796(2) 1.00364(19) 0.22694(12) 0.0162(4) Uani 1 1 d . . . . .
 H20 H 0.4087 1.0753 0.2421 0.024 Uiso 1 1 calc GR . . . .
 O21 O 0.6775(2) 0.51656(19) -0.00240(10) 0.0149(4) Uani 1 1 d . . . . .
 H21 H 0.6742 0.5897 -0.0248 0.022 Uiso 1 1 calc GR . . . .
 O22 O 0.7367(2) 0.20996(19) 0.32193(10) 0.0131(4) Uani 1 1 d . . . . .
 H22 H 0.8224 0.2177 0.3002 0.020 Uiso 1 1 calc GR . . . .
 O23 O 0.0447(2) 0.17656(19) 0.29904(11) 0.0145(4) Uani 1 1 d . . . . .
 H23 H 0.1149 0.1052 0.2830 0.022 Uiso 1 1 calc GR . . . .
 O24 O -0.1066(3) 0.69190(19) 0.50358(10) 0.0172(4) Uani 1 1 d . . . . .
 H24 H -0.0765 0.6209 0.5284 0.026 Uiso 1 1 calc GR . . . .
 N1 N 0.3689(3) 0.6695(3) 0.38334(13) 0.0185(5) Uani 1 1 d . . . . .
 H1A H 0.3848 0.5997 0.4162 0.022 Uiso 1 1 calc R . . . .
 H1B H 0.4619 0.6830 0.3667 0.022 Uiso 1 1 calc R . . . .
 N2 N 0.2680(3) 0.9835(2) 0.57109(12) 0.0118(4) Uani 1 1 d . . . . .
 H2A H 0.3672 0.9796 0.5498 0.014 Uiso 1 1 calc GR . . . .
 H2B H 0.2709 0.9247 0.6096 0.014 Uiso 1 1 calc GR . . . .
 H2C H 0.2097 1.0683 0.5857 0.014 Uiso 1 1 calc GR . . . .
 C1 C 0.2546(3) 0.7914(3) 0.41999(16) 0.0178(6) Uani 1 1 d . . . . .
 H1C H 0.1516 0.7797 0.4367 0.021 Uiso 1 1 calc R . . . .
 H1D H 0.2417 0.8696 0.3856 0.021 Uiso 1 1 calc R . . . .
 C2 C 0.3069(4) 0.8191(3) 0.48327(19) 0.0284(8) Uani 1 1 d . . . . .
 H2D H 0.3146 0.7428 0.5186 0.034 Uiso 1 1 calc R . . . .
 H2E H 0.4126 0.8257 0.4669 0.034 Uiso 1 1 calc R . . . .
 C3 C 0.1962(3) 0.9470(3) 0.51903(15) 0.0165(6) Uani 1 1 d . . . . .
 H3A H 0.1722 1.0207 0.4824 0.020 Uiso 1 1 calc R . . . .
 H3B H 0.0967 0.9345 0.5442 0.020 Uiso 1 1 calc R . . . .
 B1 B 0.1724(3) 0.8631(3) 0.22071(16) 0.0101(5) Uani 1 1 d . . . . .
 B2 B 0.4407(3) 0.7084(3) 0.16155(15) 0.0093(5) Uani 1 1 d . . . . .
 B3 B 0.5234(3) 0.4424(3) 0.18862(15) 0.0097(5) Uani 1 1 d . . . . .
 B4 B 0.3466(3) 0.3414(3) 0.27439(15) 0.0088(5) Uani 1 1 d . . . . .
 B5 B 0.0662(3) 0.5014(3) 0.33479(15) 0.0093(5) Uani 1 1 d . . . . .
 B6 B -0.0210(3) 0.7521(3) 0.30550(15) 0.0094(5) Uani 1 1 d . . . . .
 B7 B -0.1123(3) 0.9446(3) 0.22117(16) 0.0102(5) Uani 1 1 d . . . . .
 B8 B 0.4132(3) 0.9127(3) 0.21878(15) 0.0097(5) Uani 1 1 d . . . . .
 B9 B 0.5975(3) 0.5410(3) 0.06683(15) 0.0101(5) Uani 1 1 d . . . . .
 B10 B 0.6206(3) 0.2837(3) 0.28499(16) 0.0106(5) Uani 1 1 d . . . . .
 B11 B 0.1110(3) 0.2720(3) 0.29964(15) 0.0101(5) Uani 1 1 d . . . . .
 B12 B -0.0550(4) 0.6636(3) 0.43214(16) 0.0117(5) Uani 1 1 d . . . . .
 O31 O 0.3399(3) 0.2806(3) 0.09939(12) 0.0318(6) Uani 1 1 d . . . . .
 H31A H 0.3463 0.3096 0.1384 0.048 Uiso 1 1 d G . . . .
 H31B H 0.2726 0.2394 0.1136 0.048 Uiso 1 1 d G . . . .
 O32 O 0.3992(3) 0.1188(3) 0.42903(14) 0.0362(6) Uani 1 1 d . . . . .
 H32A H 0.3511 0.1846 0.4564 0.054 Uiso 1 1 d G . . . .
 H32B H 0.4288 0.1480 0.3870 0.054 Uiso 1 1 d G . . . .
 O33 O 0.6970(3) 0.4839(3) 0.38526(15) 0.0315(6) Uani 1 1 d . . . . .
 H33A H 0.6582 0.4218 0.3963 0.047 Uiso 1 1 d G . . . .
 H33B H 0.7965 0.4496 0.3765 0.047 Uiso 1 1 d G . . . .
 O34 O 0.3955(3) 0.4312(3) 0.47239(15) 0.0360(6) Uani 1 1 d . . . . .
 H34A H 0.3615 0.4440 0.5169 0.054 Uiso 1 1 d G . . . .
 H34B H 0.3543 0.3812 0.4596 0.054 Uiso 1 1 d G . . . .
 O35 O 0.5781(4) 0.8348(3) 0.35718(18) 0.0478(7) Uani 1 1 d . . . . .
 H35A H 0.6613 0.8374 0.3284 0.072 Uiso 1 1 d G . . . .
 H35B H 0.5021 0.9060 0.3512 0.072 Uiso 1 1 d G . . . .
 N11 N 0.1477(3) 0.6177(3) 0.13803(15) 0.0202(5) Uani 1 1 d . . . . .
 H11A H 0.2140 0.5481 0.1103 0.024 Uiso 1 1 calc GR . . . .
 H11B H 0.1199 0.5859 0.1833 0.024 Uiso 1 1 calc GR . . . .
 H11C H 0.1965 0.6770 0.1388 0.024 Uiso 1 1 calc GR . . . .
 N12 N -0.2202(3) 0.5859(2) 0.22505(12) 0.0133(4) Uani 1 1 d . . . . .
 H12A H -0.2896 0.6612 0.2085 0.016 Uiso 1 1 calc GR . . . .
 H12B H -0.1639 0.6097 0.2502 0.016 Uiso 1 1 calc GR . . . .
 H12C H -0.2732 0.5361 0.2540 0.016 Uiso 1 1 calc GR . . . .
 C11 C 0.0060(3) 0.6860(3) 0.10827(15) 0.0151(5) Uani 1 1 d . . . . .
 H11D H 0.0349 0.7309 0.0618 0.018 Uiso 1 1 calc R . . . .
 H11E H -0.0699 0.7562 0.1410 0.018 Uiso 1 1 calc R . . . .
 C12 C -0.0718(3) 0.5897(3) 0.09755(15) 0.0170(6) Uani 1 1 d . . . . .
 H12D H -0.1697 0.6425 0.0810 0.020 Uiso 1 1 calc R . . . .
 H12E H -0.0015 0.5290 0.0590 0.020 Uiso 1 1 calc R . . . .
 C13 C -0.1112(3) 0.5046(3) 0.16312(15) 0.0146(5) Uani 1 1 d . . . . .
 H13A H -0.1598 0.4449 0.1503 0.018 Uiso 1 1 calc R . . . .
 H13B H -0.0128 0.4469 0.1780 0.018 Uiso 1 1 calc R . . . .
 O42 O 0.7873(8) 0.1807(5) 0.0684(3) 0.0192(19) Uani 0.475(13) 1 d . . P A 1
 H42A H 0.7486 0.2617 0.0813 0.029 Uiso 0.475(13) 1 d G . P A 1
 H42B H 0.7849 0.1281 0.1051 0.029 Uiso 0.475(13) 1 d G . P A 1
 O52 O 0.1576(6) 1.1264(5) 0.1044(3) 0.0150(16) Uani 0.453(10) 1 d . . P B 1
 H52A H 0.1406 1.0792 0.1421 0.022 Uiso 0.453(10) 1 d G . P B 1
 H52B H 0.2157 1.0749 0.0705 0.022 Uiso 0.453(10) 1 d G . P B 1
 O41 O 0.8547(6) 0.2106(4) 0.0811(2) 0.0162(16) Uani 0.525(13) 1 d . . P A 2
 H41A H 0.8281 0.1646 0.1177 0.024 Uiso 0.525(13) 1 d G . P A 2
 H41B H 0.8500 0.1788 0.0438 0.024 Uiso 0.525(13) 1 d G . P A 2
 O51 O 0.0677(8) 1.1934(5) 0.1240(3) 0.0342(18) Uani 0.547(10) 1 d . . P B 2
 H51A H 0.0759 1.1234 0.1511 0.051 Uiso 0.547(10) 1 d G . P B 2
 H51B H 0.0706 1.1752 0.0818 0.051 Uiso 0.547(10) 1 d G . P B 2
 N21 N 0.3509(6) 0.8313(5) -0.0077(3) 0.0195(10) Uani 0.5 1 d . . P C -1
 H21A H 0.4328 0.8163 -0.0461 0.023 Uiso 0.5 1 calc GR . P C -1
 H21B H 0.2794 0.7987 -0.0158 0.023 Uiso 0.5 1 calc GR . P C -1
 H21C H 0.3864 0.7891 0.0320 0.023 Uiso 0.5 1 calc GR . P C -1
 N22 N 0.6281(6) 1.0893(5) -0.0104(3) 0.0186(10) Uani 0.5 1 d . . P C -1
 H22A H 0.7077 1.0364 -0.0431 0.022 Uiso 0.5 1 calc GR . P C -1
 H22B H 0.6678 1.1082 0.0241 0.022 Uiso 0.5 1 calc GR . P C -1
 H22C H 0.5765 1.1673 -0.0326 0.022 Uiso 0.5 1 calc GR . P C -1
 C21 C 0.2761(8) 0.9780(7) 0.0032(4) 0.0233(13) Uani 0.5 1 d . . P C -1
 H21D H 0.2295 0.9932 0.0546 0.028 Uiso 0.5 1 calc R . P C -1
 H21E H 0.1905 1.0159 -0.0234 0.028 Uiso 0.5 1 calc R . P C -1
 C22 C 0.3933(8) 1.0500(7) -0.0219(3) 0.0224(13) Uani 0.5 1 d . . P C -1
 H22D H 0.3353 1.1480 -0.0218 0.027 Uiso 0.5 1 calc R . P C -1
 H22E H 0.4469 1.0265 -0.0719 0.027 Uiso 0.5 1 calc R . P C -1
 C23 C 0.5171(8) 1.0176(7) 0.0227(3) 0.0205(12) Uani 0.5 1 d . . P C -1
 H23A H 0.4665 1.0468 0.0722 0.025 Uiso 0.5 1 calc R . P C -1
 H23B H 0.5745 0.9195 0.0246 0.025 Uiso 0.5 1 calc R . P C -1

loop_
  _atom_site_aniso_label
  _atom_site_aniso_U_11
  _atom_site_aniso_U_22
  _atom_site_aniso_U_33
  _atom_site_aniso_U_23
  _atom_site_aniso_U_13
  _atom_site_aniso_U_12
 Zn1 0.00837(14) 0.00714(14) 0.00831(14) -0.00086(10) -0.00195(11)
 -0.00225(11)
 O1 0.0073(8) 0.0087(8) 0.0115(8) 0.0005(7) -0.0025(7) -0.0024(7)
 O2 0.0088(8) 0.0093(8) 0.0106(8) 0.0000(7) -0.0031(7) -0.0032(7)
 O3 0.0107(8) 0.0063(8) 0.0077(8) -0.0006(6) -0.0007(7) -0.0025(7)
 O4 0.0085(8) 0.0091(8) 0.0097(8) -0.0003(7) -0.0015(7) -0.0031(7)
 O5 0.0083(8) 0.0090(8) 0.0123(9) -0.0017(7) -0.0015(7) -0.0035(7)
 O6 0.0097(8) 0.0084(8) 0.0097(8) -0.0003(7) -0.0022(7) -0.0035(7)
 O7 0.0082(8) 0.0111(9) 0.0123(9) 0.0010(7) -0.0020(7) -0.0034(7)
 O8 0.0086(9) 0.0096(9) 0.0160(9) 0.0046(7) -0.0027(7) -0.0023(7)
 O9 0.0089(9) 0.0090(8) 0.0164(9) -0.0036(7) 0.0003(7) -0.0042(7)
 O10 0.0074(8) 0.0085(8) 0.0133(9) -0.0025(7) -0.0022(7) -0.0022(7)
 O11 0.0137(9) 0.0085(8) 0.0081(8) -0.0003(7) -0.0003(7) -0.0035(7)
 O12 0.0122(9) 0.0081(8) 0.0101(9) -0.0020(7) 0.0002(7) -0.0022(7)
 O13 0.0077(8) 0.0104(9) 0.0142(9) 0.0011(7) -0.0027(7) -0.0038(7)
 O14 0.0079(8) 0.0100(8) 0.0124(9) 0.0032(7) -0.0025(7) -0.0030(7)
 O15 0.0084(8) 0.0074(8) 0.0147(9) -0.0018(7) -0.0018(7) -0.0029(7)
 O16 0.0082(8) 0.0085(8) 0.0165(9) -0.0022(7) -0.0001(7) -0.0033(7)
 O17 0.0139(9) 0.0080(8) 0.0090(8) -0.0006(7) -0.0005(7) -0.0015(7)
 O18 0.0159(9) 0.0075(8) 0.0090(9) -0.0004(7) -0.0018(7) -0.0023(7)
 O19 0.0102(9) 0.0142(9) 0.0176(10) 0.0049(7) -0.0051(8) -0.0047(7)
 O20 0.0091(9) 0.0090(9) 0.0304(11) -0.0077(8) -0.0021(8) -0.0019(7)
 O21 0.0194(10) 0.0124(9) 0.0100(9) -0.0015(7) 0.0016(8) -0.0046(8)
 O22 0.0081(9) 0.0153(9) 0.0158(9) 0.0045(7) -0.0036(7) -0.0047(7)
 O23 0.0086(9) 0.0086(9) 0.0255(11) -0.0064(8) 0.0003(8) -0.0027(7)
 O24 0.0263(11) 0.0098(9) 0.0088(9) -0.0002(7) -0.0009(8) -0.0003(8)
 N1 0.0161(12) 0.0194(12) 0.0184(12) -0.0084(10) -0.0072(10) 0.0001(10)
 N2 0.0125(11) 0.0102(10) 0.0119(10) -0.0025(8) -0.0028(9) -0.0023(9)
 C1 0.0164(13) 0.0196(14) 0.0184(14) -0.0094(11) -0.0062(11) -0.0029(11)
 C2 0.0273(17) 0.0274(17) 0.0287(17) -0.0167(14) -0.0157(14) 0.0039(14)
 C3 0.0175(14) 0.0158(13) 0.0167(13) -0.0027(11) -0.0087(11) -0.0026(11)
 B1 0.0072(13) 0.0086(13) 0.0140(13) 0.0008(10) -0.0020(11) -0.0029(10)
 B2 0.0099(13) 0.0088(13) 0.0095(13) -0.0006(10) -0.0012(10) -0.0042(10)
 B3 0.0095(13) 0.0090(13) 0.0090(13) -0.0016(10) 0.0002(10) -0.0024(10)
 B4 0.0079(12) 0.0076(12) 0.0111(13) 0.0005(10) -0.0026(10) -0.0027(10)
 B5 0.0073(13) 0.0094(13) 0.0106(13) -0.0009(10) 0.0004(10) -0.0036(10)
 B6 0.0076(12) 0.0099(13) 0.0103(13) 0.0000(10) -0.0018(10) -0.0030(10)
 B7 0.0112(13) 0.0074(12) 0.0115(13) -0.0021(10) -0.0032(11) -0.0016(10)
 B8 0.0114(13) 0.0080(12) 0.0103(13) 0.0010(10) -0.0038(10) -0.0034(10)
 B9 0.0097(13) 0.0111(13) 0.0104(13) -0.0017(10) -0.0025(10) -0.0039(11)
 B10 0.0104(13) 0.0083(13) 0.0124(13) -0.0019(10) -0.0015(11) -0.0025(10)
 B11 0.0114(13) 0.0092(13) 0.0107(13) 0.0000(10) -0.0026(11) -0.0045(11)
 B12 0.0128(14) 0.0104(13) 0.0113(13) -0.0011(10) -0.0021(11) -0.0036(11)
 O31 0.0625(18) 0.0357(14) 0.0123(10) 0.0037(9) -0.0089(11) -0.0354(13)
 O32 0.0194(12) 0.0411(15) 0.0315(13) 0.0217(12) 0.0004(10) -0.0023(11)
 O33 0.0152(11) 0.0335(13) 0.0427(15) 0.0048(11) -0.0026(10) -0.0090(10)
 O34 0.0400(15) 0.0284(14) 0.0448(16) 0.0033(12) -0.0160(13) -0.0148(12)
 O35 0.0332(15) 0.056(2) 0.0515(19) 0.0032(15) -0.0013(14) -0.0186(14)
 N11 0.0147(12) 0.0169(12) 0.0320(14) -0.0114(10) -0.0081(10) -0.0036(10)
 N12 0.0125(11) 0.0158(11) 0.0140(11) 0.0023(9) -0.0043(9) -0.0076(9)
 C11 0.0155(13) 0.0188(13) 0.0131(12) 0.0009(10) -0.0039(10) -0.0082(11)
 C12 0.0144(13) 0.0246(15) 0.0144(13) -0.0040(11) -0.0034(11) -0.0085(11)
 C13 0.0127(13) 0.0135(13) 0.0204(14) -0.0031(10) -0.0048(11) -0.0061(10)
 O42 0.028(3) 0.011(2) 0.012(2) 0.0007(17) -0.0032(19) 0.000(2)
 O52 0.011(3) 0.014(3) 0.014(2) 0.0011(19) 0.0017(19) -0.001(2)
 O41 0.015(2) 0.015(2) 0.016(2) 0.0001(15) -0.0019(17) -0.0028(17)
 O51 0.047(4) 0.022(3) 0.030(3) 0.005(2) 0.000(3) -0.014(3)
 N21 0.025(3) 0.022(3) 0.017(2) 0.005(2) -0.011(2) -0.011(2)
 N22 0.024(3) 0.013(2) 0.017(2) -0.0007(19) -0.004(2) -0.004(2)
 C21 0.021(3) 0.019(3) 0.027(3) -0.004(3) -0.004(3) -0.004(3)
 C22 0.027(4) 0.016(3) 0.024(3) 0.003(2) -0.008(3) -0.007(3)
 C23 0.022(3) 0.017(3) 0.021(3) 0.004(2) -0.007(3) -0.006(3)

_geom_special_details
;
 All esds (except the esd in the dihedral angle between two l.s. planes)
 are estimated using the full covariance matrix.  The cell esds are taken
 into account individually in the estimation of esds in distances, angles
 and torsion angles; correlations between esds in cell parameters are only
 used when they are defined by crystal symmetry.  An approximate (isotropic)
 treatment of cell esds is used for estimating esds involving l.s. planes.
;
loop_
  _geom_bond_atom_site_label_1
  _geom_bond_atom_site_label_2
  _geom_bond_distance
  _geom_bond_site_symmetry_2
  _geom_bond_publ_flag
 Zn1 O1 1.9717(18) . ?
 Zn1 O3 1.9592(18) . ?
 Zn1 O5 1.9709(18) . ?
 Zn1 N1 2.006(2) . ?
 O1 B1 1.480(3) . ?
 O1 B6 1.483(3) . ?
 O2 B1 1.469(3) . ?
 O2 B2 1.460(3) . ?
 O3 B2 1.483(3) . ?
 O3 B3 1.506(3) . ?
 O4 B3 1.443(3) . ?
 O4 B4 1.441(3) . ?
 O5 B4 1.491(3) . ?
 O5 B5 1.482(3) . ?
 O6 B5 1.460(3) . ?
 O6 B6 1.459(3) . ?
 O7 B6 1.459(3) . ?
 O7 B7 1.361(3) . ?
 O8 B1 1.464(3) . ?
 O8 B7 1.356(3) . ?
 O9 B1 1.484(3) . ?
 O9 B8 1.372(3) . ?
 O10 B2 1.482(3) . ?
 O10 B8 1.364(3) . ?
 O11 B2 1.470(3) . ?
 O11 B9 1.369(3) . ?
 O12 B3 1.470(3) . ?
 O12 B9 1.354(3) . ?
 O13 B3 1.483(3) . ?
 O13 B10 1.351(3) . ?
 O14 B4 1.484(3) . ?
 O14 B10 1.363(3) . ?
 O15 B4 1.476(3) . ?
 O15 B11 1.356(3) . ?
 O16 B5 1.464(3) . ?
 O16 B11 1.357(3) . ?
 O17 B5 1.485(3) . ?
 O17 B12 1.359(3) . ?
 O18 B6 1.489(3) . ?
 O18 B12 1.361(3) . ?
 O19 H19 0.8400 . ?
 O19 B7 1.377(3) . ?
 O20 H20 0.8400 . ?
 O20 B8 1.372(3) . ?
 O21 H21 0.8400 . ?
 O21 B9 1.369(3) . ?
 O22 H22 0.8400 . ?
 O22 B10 1.386(3) . ?
 O23 H23 0.8400 . ?
 O23 B11 1.377(3) . ?
 O24 H24 0.8400 . ?
 O24 B12 1.378(3) . ?
 N1 H1A 0.9100 . ?
 N1 H1B 0.9100 . ?
 N1 C1 1.480(4) . ?
 N2 H2A 0.9100 . ?
 N2 H2B 0.9100 . ?
 N2 H2C 0.9100 . ?
 N2 C3 1.490(3) . ?
 C1 H1C 0.9900 . ?
 C1 H1D 0.9900 . ?
 C1 C2 1.515(4) . ?
 C2 H2D 0.9900 . ?
 C2 H2E 0.9900 . ?
 C2 C3 1.509(4) . ?
 C3 H3A 0.9900 . ?
 C3 H3B 0.9900 . ?
 O31 H31A 0.8705 . ?
 O31 H31B 0.8698 . ?
 O32 H32A 0.8498 . ?
 O32 H32B 0.8503 . ?
 O33 H33A 0.8502 . ?
 O33 H33B 0.8499 . ?
 O34 H34A 0.8500 . ?
 O34 H34B 0.8499 . ?
 O35 H35A 0.8497 . ?
 O35 H35B 0.8498 . ?
 N11 H11A 0.9100 . ?
 N11 H11B 0.9100 . ?
 N11 H11C 0.9100 . ?
 N11 C11 1.477(4) . ?
 N12 H12A 0.9100 . ?
 N12 H12B 0.9100 . ?
 N12 H12C 0.9100 . ?
 N12 C13 1.499(4) . ?
 C11 H11D 0.9900 . ?
 C11 H11E 0.9900 . ?
 C11 C12 1.518(4) . ?
 C12 H12D 0.9900 . ?
 C12 H12E 0.9900 . ?
 C12 C13 1.517(4) . ?
 C13 H13A 0.9900 . ?
 C13 H13B 0.9900 . ?
 O42 H42A 0.8505 . ?
 O42 H42B 0.8493 . ?
 O52 H52A 0.8494 . ?
 O52 H52B 0.8515 . ?
 O41 H41A 0.8501 . ?
 O41 H41B 0.8495 . ?
 O51 H51A 0.8495 . ?
 O51 H51B 0.8509 . ?
 N21 H21A 0.9100 . ?
 N21 H21B 0.9100 . ?
 N21 H21C 0.9100 . ?
 N21 C21 1.485(8) . ?
 N22 H22A 0.9100 . ?
 N22 H22B 0.9100 . ?
 N22 H22C 0.9100 . ?
 N22 C23 1.490(8) . ?
 C21 H21D 0.9900 . ?
 C21 H21E 0.9900 . ?
 C21 C22 1.516(9) . ?
 C22 H22D 0.9900 . ?
 C22 H22E 0.9900 . ?
 C22 C23 1.523(9) . ?
 C23 H23A 0.9900 . ?
 C23 H23B 0.9900 . ?

loop_
  _geom_angle_atom_site_label_1
  _geom_angle_atom_site_label_2
  _geom_angle_atom_site_label_3
  _geom_angle
  _geom_angle_site_symmetry_1
  _geom_angle_site_symmetry_3
  _geom_angle_publ_flag
 O1 Zn1 N1 104.18(9) . . ?
 O3 Zn1 O1 103.43(7) . . ?
 O3 Zn1 O5 104.88(7) . . ?
 O3 Zn1 N1 117.86(9) . . ?
 O5 Zn1 O1 107.85(7) . . ?
 O5 Zn1 N1 117.42(10) . . ?
 B1 O1 Zn1 114.78(15) . . ?
 B1 O1 B6 127.0(2) . . ?
 B6 O1 Zn1 112.11(15) . . ?
 B2 O2 B1 119.7(2) . . ?
 B2 O3 Zn1 114.35(15) . . ?
 B2 O3 B3 127.5(2) . . ?
 B3 O3 Zn1 112.96(15) . . ?
 B4 O4 B3 119.4(2) . . ?
 B4 O5 Zn1 114.39(15) . . ?
 B5 O5 Zn1 111.14(15) . . ?
 B5 O5 B4 124.7(2) . . ?
 B6 O6 B5 120.5(2) . . ?
 B7 O7 B6 123.5(2) . . ?
 B7 O8 B1 123.4(2) . . ?
 B8 O9 B1 121.3(2) . . ?
 B8 O10 B2 120.4(2) . . ?
 B9 O11 B2 124.2(2) . . ?
 B9 O12 B3 124.5(2) . . ?
 B10 O13 B3 120.7(2) . . ?
 B10 O14 B4 120.0(2) . . ?
 B11 O15 B4 123.8(2) . . ?
 B11 O16 B5 123.4(2) . . ?
 B12 O17 B5 121.6(2) . . ?
 B12 O18 B6 122.3(2) . . ?
 B7 O19 H19 109.5 . . ?
 B8 O20 H20 109.5 . . ?
 B9 O21 H21 109.5 . . ?
 B10 O22 H22 109.5 . . ?
 B11 O23 H23 109.5 . . ?
 B12 O24 H24 109.5 . . ?
 Zn1 N1 H1A 108.3 . . ?
 Zn1 N1 H1B 108.3 . . ?
 H1A N1 H1B 107.4 . . ?
 C1 N1 Zn1 115.79(18) . . ?
 C1 N1 H1A 108.3 . . ?
 C1 N1 H1B 108.3 . . ?
 H2A N2 H2B 109.5 . . ?
 H2A N2 H2C 109.5 . . ?
 H2B N2 H2C 109.5 . . ?
 C3 N2 H2A 109.5 . . ?
 C3 N2 H2B 109.5 . . ?
 C3 N2 H2C 109.5 . . ?
 N1 C1 H1C 109.3 . . ?
 N1 C1 H1D 109.3 . . ?
 N1 C1 C2 111.7(2) . . ?
 H1C C1 H1D 107.9 . . ?
 C2 C1 H1C 109.3 . . ?
 C2 C1 H1D 109.3 . . ?
 C1 C2 H2D 109.1 . . ?
 C1 C2 H2E 109.1 . . ?
 H2D C2 H2E 107.8 . . ?
 C3 C2 C1 112.6(3) . . ?
 C3 C2 H2D 109.1 . . ?
 C3 C2 H2E 109.1 . . ?
 N2 C3 C2 110.2(2) . . ?
 N2 C3 H3A 109.6 . . ?
 N2 C3 H3B 109.6 . . ?
 C2 C3 H3A 109.6 . . ?
 C2 C3 H3B 109.6 . . ?
 H3A C3 H3B 108.1 . . ?
 O1 B1 O9 110.3(2) . . ?
 O2 B1 O1 110.8(2) . . ?
 O2 B1 O9 108.1(2) . . ?
 O8 B1 O1 110.3(2) . . ?
 O8 B1 O2 109.4(2) . . ?
 O8 B1 O9 107.9(2) . . ?
 O2 B2 O3 112.1(2) . . ?
 O2 B2 O10 109.5(2) . . ?
 O2 B2 O11 107.5(2) . . ?
 O10 B2 O3 108.6(2) . . ?
 O11 B2 O3 110.3(2) . . ?
 O11 B2 O10 108.9(2) . . ?
 O4 B3 O3 111.6(2) . . ?
 O4 B3 O12 109.5(2) . . ?
 O4 B3 O13 111.4(2) . . ?
 O12 B3 O3 109.9(2) . . ?
 O12 B3 O13 107.9(2) . . ?
 O13 B3 O3 106.3(2) . . ?
 O4 B4 O5 111.0(2) . . ?
 O4 B4 O14 110.9(2) . . ?
 O4 B4 O15 109.6(2) . . ?
 O14 B4 O5 108.2(2) . . ?
 O15 B4 O5 110.6(2) . . ?
 O15 B4 O14 106.4(2) . . ?
 O5 B5 O17 106.6(2) . . ?
 O6 B5 O5 111.5(2) . . ?
 O6 B5 O16 108.6(2) . . ?
 O6 B5 O17 111.0(2) . . ?
 O16 B5 O5 111.8(2) . . ?
 O16 B5 O17 107.3(2) . . ?
 O1 B6 O18 108.4(2) . . ?
 O6 B6 O1 110.6(2) . . ?
 O6 B6 O18 109.6(2) . . ?
 O7 B6 O1 110.9(2) . . ?
 O7 B6 O6 109.4(2) . . ?
 O7 B6 O18 108.0(2) . . ?
 O7 B7 O19 119.9(2) . . ?
 O8 B7 O7 123.1(2) . . ?
 O8 B7 O19 117.0(2) . . ?
 O10 B8 O9 122.3(2) . . ?
 O10 B8 O20 118.2(2) . . ?
 O20 B8 O9 119.4(2) . . ?
 O11 B9 O21 119.6(2) . . ?
 O12 B9 O11 122.7(2) . . ?
 O12 B9 O21 117.6(2) . . ?
 O13 B10 O14 123.0(2) . . ?
 O13 B10 O22 121.5(2) . . ?
 O14 B10 O22 115.4(2) . . ?
 O15 B11 O16 122.5(2) . . ?
 O15 B11 O23 120.8(2) . . ?
 O16 B11 O23 116.6(2) . . ?
 O17 B12 O18 122.0(2) . . ?
 O17 B12 O24 120.6(2) . . ?
 O18 B12 O24 117.3(2) . . ?
 H31A O31 H31B 104.5 . . ?
 H32A O32 H32B 109.4 . . ?
 H33A O33 H33B 109.5 . . ?
 H34A O34 H34B 109.4 . . ?
 H35A O35 H35B 109.4 . . ?
 H11A N11 H11B 109.5 . . ?
 H11A N11 H11C 109.5 . . ?
 H11B N11 H11C 109.5 . . ?
 C11 N11 H11A 109.5 . . ?
 C11 N11 H11B 109.5 . . ?
 C11 N11 H11C 109.5 . . ?
 H12A N12 H12B 109.5 . . ?
 H12A N12 H12C 109.5 . . ?
 H12B N12 H12C 109.5 . . ?
 C13 N12 H12A 109.5 . . ?
 C13 N12 H12B 109.5 . . ?
 C13 N12 H12C 109.5 . . ?
 N11 C11 H11D 109.1 . . ?
 N11 C11 H11E 109.1 . . ?
 N11 C11 C12 112.5(2) . . ?
 H11D C11 H11E 107.8 . . ?
 C12 C11 H11D 109.1 . . ?
 C12 C11 H11E 109.1 . . ?
 C11 C12 H12D 108.4 . . ?
 C11 C12 H12E 108.4 . . ?
 H12D C12 H12E 107.5 . . ?
 C13 C12 C11 115.4(2) . . ?
 C13 C12 H12D 108.4 . . ?
 C13 C12 H12E 108.4 . . ?
 N12 C13 C12 113.4(2) . . ?
 N12 C13 H13A 108.9 . . ?
 N12 C13 H13B 108.9 . . ?
 C12 C13 H13A 108.9 . . ?
 C12 C13 H13B 108.9 . . ?
 H13A C13 H13B 107.7 . . ?
 H42A O42 H42B 109.5 . . ?
 H52A O52 H52B 109.4 . . ?
 H41A O41 H41B 109.5 . . ?
 H51A O51 H51B 109.4 . . ?
 H21A N21 H21B 109.5 . . ?
 H21A N21 H21C 109.5 . . ?
 H21B N21 H21C 109.5 . . ?
 C21 N21 H21A 109.5 . . ?
 C21 N21 H21B 109.5 . . ?
 C21 N21 H21C 109.5 . . ?
 H22A N22 H22B 109.5 . . ?
 H22A N22 H22C 109.5 . . ?
 H22B N22 H22C 109.5 . . ?
 C23 N22 H22A 109.5 . . ?
 C23 N22 H22B 109.5 . . ?
 C23 N22 H22C 109.5 . . ?
 N21 C21 H21D 109.3 . . ?
 N21 C21 H21E 109.3 . . ?
 N21 C21 C22 111.6(6) . . ?
 H21D C21 H21E 108.0 . . ?
 C22 C21 H21D 109.3 . . ?
 C22 C21 H21E 109.3 . . ?
 C21 C22 H22D 108.6 . . ?
 C21 C22 H22E 108.6 . . ?
 C21 C22 C23 114.9(5) . . ?
 H22D C22 H22E 107.5 . . ?
 C23 C22 H22D 108.6 . . ?
 C23 C22 H22E 108.6 . . ?
 N22 C23 C22 108.7(5) . . ?
 N22 C23 H23A 109.9 . . ?
 N22 C23 H23B 109.9 . . ?
 C22 C23 H23A 109.9 . . ?
 C22 C23 H23B 109.9 . . ?
 H23A C23 H23B 108.3 . . ?

loop_
  _geom_hbond_atom_site_label_D
  _geom_hbond_atom_site_label_H
  _geom_hbond_atom_site_label_A
  _geom_hbond_distance_DH
  _geom_hbond_distance_HA
  _geom_hbond_distance_DA
  _geom_hbond_angle_DHA
  _geom_hbond_site_symmetry_A
 O19 H19 O20 0.84 1.92 2.746(3) 166.3 1_455
 O20 H20 O15 0.84 1.89 2.730(3) 173.5 1_565
 O21 H21 O31 0.84 1.86 2.668(3) 159.8 2_665
 O22 H22 O23 0.84 1.96 2.707(3) 147.5 1_655
 O23 H23 O9 0.84 1.88 2.717(3) 173.3 1_545
 O24 H24 O17 0.84 1.89 2.732(3) 177.2 2_566
 N1 H1A O34 0.91 1.97 2.858(4) 165.7 .
 N1 H1B O33 0.91 2.51 2.997(3) 114.2 .
 N1 H1B O35 0.91 2.23 3.007(4) 143.1 .
 N2 H2A O32 0.91 2.17 2.904(3) 137.2 2_666
 N2 H2B O22 0.91 1.84 2.740(3) 169.6 2_666
 N2 H2C O18 0.91 1.80 2.709(3) 172.8 2_576
 O31 H31A O4 0.87 1.81 2.657(3) 163.8 .
 O31 H31B O52 0.87 1.93 2.753(5) 156.1 1_545
 O31 H31B O51 0.87 2.11 2.940(6) 159.7 1_545
 O32 H32A O24 0.85 2.19 2.863(3) 136.3 2_566
 O32 H32B O14 0.85 1.92 2.739(3) 160.1 .
 O33 H33A O34 0.85 2.52 3.127(4) 129.1 .
 O33 H33B O16 0.85 1.93 2.750(3) 161.7 1_655
 O34 H34A O33 0.85 2.00 2.829(4) 164.4 2_666
 O35 H35A O7 0.85 1.96 2.805(3) 173.3 1_655
 O35 H35B O20 0.85 2.52 3.032(4) 119.9 .
 N11 H11A O21 0.91 2.16 2.956(3) 145.6 2_665
 N11 H11B O6 0.91 2.10 2.931(3) 151.0 .
 N11 H11C O2 0.91 1.71 2.602(3) 167.9 .
 N12 H12A O10 0.91 2.01 2.890(3) 161.1 1_455
 N12 H12B O6 0.91 1.86 2.747(3) 164.0 .
 N12 H12C O13 0.91 2.29 2.977(3) 131.9 1_455
 N12 H12C O33 0.91 2.49 3.157(3) 130.1 1_455
 O42 H42A O12 0.85 1.92 2.740(5) 161.4 .
 O42 H42B O19 0.85 1.82 2.664(5) 175.1 1_645
 O52 H52A O8 0.85 2.01 2.779(5) 150.0 .
 O52 H52A O9 0.85 2.48 3.210(5) 144.7 .
 O41 H41A O19 0.85 2.00 2.835(5) 167.4 1_645
 O51 H51A O8 0.85 2.03 2.842(5) 158.7 .
 N21 H21A O31 0.91 2.07 2.914(6) 154.3 2_665
 N21 H21C O2 0.91 2.43 3.147(5) 136.1 .
 N21 H21C O11 0.91 1.90 2.764(5) 158.9 .
 N22 H22C O11 0.91 1.97 2.878(6) 175.3 2_675

loop_
  _geom_torsion_atom_site_label_1
  _geom_torsion_atom_site_label_2
  _geom_torsion_atom_site_label_3
  _geom_torsion_atom_site_label_4
  _geom_torsion
  _geom_torsion_site_symmetry_1
  _geom_torsion_site_symmetry_2
  _geom_torsion_site_symmetry_3
  _geom_torsion_site_symmetry_4
  _geom_torsion_publ_flag
 Zn1 O1 B1 O2 45.0(2) . . . . ?
 Zn1 O1 B1 O8 166.27(15) . . . . ?
 Zn1 O1 B1 O9 -74.7(2) . . . . ?
 Zn1 O1 B6 O6 -40.8(2) . . . . ?
 Zn1 O1 B6 O7 -162.35(16) . . . . ?
 Zn1 O1 B6 O18 79.3(2) . . . . ?
 Zn1 O3 B2 O2 -44.1(2) . . . . ?
 Zn1 O3 B2 O10 76.9(2) . . . . ?
 Zn1 O3 B2 O11 -163.87(15) . . . . ?
 Zn1 O3 B3 O4 42.9(2) . . . . ?
 Zn1 O3 B3 O12 164.64(15) . . . . ?
 Zn1 O3 B3 O13 -78.8(2) . . . . ?
 Zn1 O5 B4 O4 -41.2(2) . . . . ?
 Zn1 O5 B4 O14 80.7(2) . . . . ?
 Zn1 O5 B4 O15 -163.05(15) . . . . ?
 Zn1 O5 B5 O6 41.5(2) . . . . ?
 Zn1 O5 B5 O16 163.26(16) . . . . ?
 Zn1 O5 B5 O17 -79.8(2) . . . . ?
 Zn1 N1 C1 C2 176.9(2) . . . . ?
 N1 C1 C2 C3 177.0(3) . . . . ?
 C1 C2 C3 N2 -168.9(3) . . . . ?
 B1 O1 B6 O6 109.9(3) . . . . ?
 B1 O1 B6 O7 -11.6(3) . . . . ?
 B1 O1 B6 O18 -129.9(2) . . . . ?
 B1 O2 B2 O3 73.8(3) . . . . ?
 B1 O2 B2 O10 -46.7(3) . . . . ?
 B1 O2 B2 O11 -164.9(2) . . . . ?
 B1 O8 B7 O7 6.6(4) . . . . ?
 B1 O8 B7 O19 -170.3(2) . . . . ?
 B1 O9 B8 O10 -13.1(4) . . . . ?
 B1 O9 B8 O20 166.5(2) . . . . ?
 B2 O2 B1 O1 -73.9(3) . . . . ?
 B2 O2 B1 O8 164.3(2) . . . . ?
 B2 O2 B1 O9 47.1(3) . . . . ?
 B2 O3 B3 O4 -109.8(3) . . . . ?
 B2 O3 B3 O12 11.9(3) . . . . ?
 B2 O3 B3 O13 128.5(2) . . . . ?
 B2 O10 B8 O9 14.0(4) . . . . ?
 B2 O10 B8 O20 -165.6(2) . . . . ?
 B2 O11 B9 O12 -0.5(4) . . . . ?
 B2 O11 B9 O21 -177.6(2) . . . . ?
 B3 O3 B2 O2 108.3(3) . . . . ?
 B3 O3 B2 O10 -130.7(2) . . . . ?
 B3 O3 B2 O11 -11.4(3) . . . . ?
 B3 O4 B4 O5 76.3(3) . . . . ?
 B3 O4 B4 O14 -44.0(3) . . . . ?
 B3 O4 B4 O15 -161.2(2) . . . . ?
 B3 O12 B9 O11 1.1(4) . . . . ?
 B3 O12 B9 O21 178.3(2) . . . . ?
 B3 O13 B10 O14 -8.0(4) . . . . ?
 B3 O13 B10 O22 176.1(2) . . . . ?
 B4 O4 B3 O3 -77.9(3) . . . . ?
 B4 O4 B3 O12 160.2(2) . . . . ?
 B4 O4 B3 O13 40.8(3) . . . . ?
 B4 O5 B5 O6 -102.2(3) . . . . ?
 B4 O5 B5 O16 19.6(3) . . . . ?
 B4 O5 B5 O17 136.5(2) . . . . ?
 B4 O14 B10 O13 4.4(4) . . . . ?
 B4 O14 B10 O22 -179.5(2) . . . . ?
 B4 O15 B11 O16 4.5(4) . . . . ?
 B4 O15 B11 O23 -177.4(2) . . . . ?
 B5 O5 B4 O4 101.5(3) . . . . ?
 B5 O5 B4 O14 -136.6(2) . . . . ?
 B5 O5 B4 O15 -20.4(3) . . . . ?
 B5 O6 B6 O1 78.0(3) . . . . ?
 B5 O6 B6 O7 -159.6(2) . . . . ?
 B5 O6 B6 O18 -41.4(3) . . . . ?
 B5 O16 B11 O15 -5.7(4) . . . . ?
 B5 O16 B11 O23 176.1(2) . . . . ?
 B5 O17 B12 O18 -3.8(4) . . . . ?
 B5 O17 B12 O24 177.9(2) . . . . ?
 B6 O1 B1 O2 -105.2(3) . . . . ?
 B6 O1 B1 O8 16.1(3) . . . . ?
 B6 O1 B1 O9 135.2(2) . . . . ?
 B6 O6 B5 O5 -79.0(3) . . . . ?
 B6 O6 B5 O16 157.4(2) . . . . ?
 B6 O6 B5 O17 39.7(3) . . . . ?
 B6 O7 B7 O8 -0.9(4) . . . . ?
 B6 O7 B7 O19 175.9(2) . . . . ?
 B6 O18 B12 O17 1.4(4) . . . . ?
 B6 O18 B12 O24 179.7(2) . . . . ?
 B7 O7 B6 O1 2.9(3) . . . . ?
 B7 O7 B6 O6 -119.3(2) . . . . ?
 B7 O7 B6 O18 121.5(2) . . . . ?
 B7 O8 B1 O1 -13.0(3) . . . . ?
 B7 O8 B1 O2 109.2(3) . . . . ?
 B7 O8 B1 O9 -133.5(2) . . . . ?
 B8 O9 B1 O1 105.5(3) . . . . ?
 B8 O9 B1 O2 -15.8(3) . . . . ?
 B8 O9 B1 O8 -134.0(2) . . . . ?
 B8 O10 B2 O2 14.3(3) . . . . ?
 B8 O10 B2 O3 -108.4(2) . . . . ?
 B8 O10 B2 O11 131.6(2) . . . . ?
 B9 O11 B2 O2 -117.4(2) . . . . ?
 B9 O11 B2 O3 5.1(3) . . . . ?
 B9 O11 B2 O10 124.1(2) . . . . ?
 B9 O12 B3 O3 -6.0(3) . . . . ?
 B9 O12 B3 O4 116.9(3) . . . . ?
 B9 O12 B3 O13 -121.6(2) . . . . ?
 B10 O13 B3 O3 108.2(2) . . . . ?
 B10 O13 B3 O4 -13.6(3) . . . . ?
 B10 O13 B3 O12 -133.9(2) . . . . ?
 B10 O14 B4 O4 20.3(3) . . . . ?
 B10 O14 B4 O5 -101.7(3) . . . . ?
 B10 O14 B4 O15 139.4(2) . . . . ?
 B11 O15 B4 O4 -115.0(3) . . . . ?
 B11 O15 B4 O5 7.7(3) . . . . ?
 B11 O15 B4 O14 125.0(2) . . . . ?
 B11 O16 B5 O5 -5.7(3) . . . . ?
 B11 O16 B5 O6 117.8(3) . . . . ?
 B11 O16 B5 O17 -122.2(2) . . . . ?
 B12 O17 B5 O5 106.2(3) . . . . ?
 B12 O17 B5 O6 -15.4(3) . . . . ?
 B12 O17 B5 O16 -133.9(2) . . . . ?
 B12 O18 B6 O1 -101.0(3) . . . . ?
 B12 O18 B6 O6 19.8(3) . . . . ?
 B12 O18 B6 O7 138.8(2) . . . . ?
 N11 C11 C12 C13 54.0(3) . . . . ?
 C11 C12 C13 N12 59.3(3) . . . . ?
 N21 C21 C22 C23 -68.4(8) . . . . ?
 C21 C22 C23 N22 177.0(5) . . . . ?

_shelx_res_file
;
    2017ncs0216s.res created by SHELXL-2014/7

TITL 2017ncs0216s_a.res in P-1
REM Old TITL 2017ncs0216_1b in P-1
REM SHELXT solution in P-1
REM R1 0.115, Rweak 0.014, Alpha 0.076, Orientation as input
REM Formula found by SHELXT: C24 N4 O9 F22 Br
CELL 0.71075 9.3681 10.691 19.2746 82.954 76.156 68.655
ZERR 2 0.0002 0.0002 0.0004 0.002 0.002 0.002
LATT 1
SFAC C H B N O Zn
UNIT 15 98 24 10 62 2
EQIV $1 -1+X,+Y,+Z
EQIV $2 +X,1+Y,+Z
EQIV $3 1-X,1-Y,-Z
EQIV $4 1+X,+Y,+Z
EQIV $5 +X,-1+Y,+Z
EQIV $6 -X,1-Y,1-Z
EQIV $7 1-X,1-Y,1-Z
EQIV $8 -X,2-Y,1-Z
EQIV $9 1+X,-1+Y,+Z
EQIV $10 1-X,2-Y,-Z

L.S. 20
PLAN  10
SIZE 0.08 0.14 0.17
TEMP -173(2)
HTAB O19 O20_$1
HTAB O20 O15_$2
HTAB O21 O31_$3
HTAB O22 O23_$4
HTAB O23 O9_$5
HTAB O24 O17_$6
HTAB N1 O34
HTAB N1 O33
HTAB N1 O35
HTAB N2 O32_$7
HTAB N2 O22_$7
HTAB N2 O18_$8
HTAB O31 O4
HTAB O31 O52_$5
HTAB O31 O51_$5
HTAB O32 O24_$6
HTAB O32 O14
HTAB O33 O34
HTAB O33 O16_$4
HTAB O34 O33_$7
HTAB O35 O7_$4
HTAB O35 O20
HTAB N11 O21_$3
HTAB N11 O6
HTAB N11 O2
HTAB N12 O10_$1
HTAB N12 O6
HTAB N12 O13_$1
HTAB N12 O33_$1
HTAB O42 O12
HTAB O42 O19_$9
HTAB O52 O8
HTAB O52 O9
HTAB O41 O19_$9
HTAB O51 O8
HTAB N21 O31_$3
HTAB N21 O2
HTAB N21 O11
HTAB N22 O11_$10
BUMP -0.03
CONF
HTAB
BOND $H
fmap 2
acta
OMIT 1 0 1
OMIT 0 -1 1
OMIT 1 -4 1
REM <olex2.extras>
REM <HklSrc "%.\\2017ncs0216s.hkl">
REM </olex2.extras>

WGHT    0.013900    5.379400
FVAR       0.58500   0.45275   0.47486
ZN1   6    0.308352    0.615869    0.301555    11.00000    0.00837    0.00714 =
         0.00831   -0.00086   -0.00195   -0.00225
O1    5    0.130850    0.774336    0.281198    11.00000    0.00731    0.00871 =
         0.01154    0.00047   -0.00250   -0.00237
O2    5    0.276721    0.783961    0.159418    11.00000    0.00875    0.00927 =
         0.01056   -0.00002   -0.00308   -0.00323
O3    5    0.458618    0.586740    0.209665    11.00000    0.01074    0.00633 =
         0.00769   -0.00057   -0.00072   -0.00248
O4    5    0.402484    0.383720    0.202346    11.00000    0.00850    0.00914 =
         0.00967   -0.00027   -0.00147   -0.00310
O5    5    0.239577    0.459070    0.317690    11.00000    0.00828    0.00904 =
         0.01228   -0.00166   -0.00151   -0.00350
O6    5   -0.004321    0.616782    0.289733    11.00000    0.00973    0.00840 =
         0.00970   -0.00027   -0.00217   -0.00354
O7    5   -0.140898    0.850228    0.271187    11.00000    0.00818    0.01110 =
         0.01225    0.00104   -0.00202   -0.00339
O8    5    0.030588    0.957423    0.199014    11.00000    0.00862    0.00958 =
         0.01597    0.00457   -0.00265   -0.00230
O9    5    0.254544    0.942701    0.242089    11.00000    0.00890    0.00899 =
         0.01639   -0.00358    0.00033   -0.00422
O10   5    0.508454    0.795192    0.187096    11.00000    0.00735    0.00852 =
         0.01328   -0.00252   -0.00222   -0.00221
O11   5    0.524730    0.670709    0.088128    11.00000    0.01375    0.00854 =
         0.00809   -0.00029   -0.00028   -0.00352
O12   5    0.599652    0.433623    0.112370    11.00000    0.01220    0.00814 =
         0.01014   -0.00201    0.00024   -0.00221
O13   5    0.645511    0.370837    0.230505    11.00000    0.00775    0.01038 =
         0.01422    0.00115   -0.00275   -0.00378
O14   5    0.479005    0.268132    0.310261    11.00000    0.00786    0.00998 =
         0.01242    0.00321   -0.00251   -0.00297
O15   5    0.266178    0.246291    0.272843    11.00000    0.00842    0.00744 =
         0.01467   -0.00184   -0.00185   -0.00289
O16   5    0.012887    0.392399    0.326302    11.00000    0.00816    0.00853 =
         0.01652   -0.00219   -0.00013   -0.00327
O17   5    0.014476    0.534457    0.411486    11.00000    0.01390    0.00801 =
         0.00903   -0.00057   -0.00053   -0.00151
O18   5   -0.072888    0.769766    0.384079    11.00000    0.01593    0.00753 =
         0.00900   -0.00039   -0.00176   -0.00232
O19   5   -0.229781    1.028182    0.188058    11.00000    0.01020    0.01423 =
         0.01760    0.00492   -0.00509   -0.00468
AFIX 147
H19   2   -0.311162    1.008619    0.203448    11.00000   -1.50000
AFIX   0
O20   5    0.479604    1.003643    0.226939    11.00000    0.00909    0.00896 =
         0.03037   -0.00774   -0.00211   -0.00194
AFIX 147
H20   2    0.408675    1.075322    0.242112    11.00000   -1.50000
AFIX   0
O21   5    0.677537    0.516560   -0.002400    11.00000    0.01936    0.01242 =
         0.01003   -0.00152    0.00157   -0.00465
AFIX 147
H21   2    0.674172    0.589741   -0.024830    11.00000   -1.50000
AFIX   0
O22   5    0.736701    0.209962    0.321926    11.00000    0.00814    0.01530 =
         0.01576    0.00448   -0.00363   -0.00472
AFIX 147
H22   2    0.822407    0.217695    0.300222    11.00000   -1.50000
AFIX   0
O23   5    0.044731    0.176559    0.299038    11.00000    0.00856    0.00857 =
         0.02547   -0.00639    0.00030   -0.00269
AFIX 147
H23   2    0.114948    0.105231    0.282950    11.00000   -1.50000
AFIX   0
O24   5   -0.106635    0.691900    0.503577    11.00000    0.02632    0.00982 =
         0.00880   -0.00018   -0.00095   -0.00029
AFIX 147
H24   2   -0.076497    0.620866    0.528447    11.00000   -1.50000
AFIX   0
N1    4    0.368938    0.669499    0.383342    11.00000    0.01614    0.01943 =
         0.01842   -0.00842   -0.00716    0.00014
AFIX  23
H1A   2    0.384847    0.599703    0.416186    11.00000   -1.20000
H1B   2    0.461901    0.682957    0.366738    11.00000   -1.20000
AFIX   0
N2    4    0.267966    0.983454    0.571087    11.00000    0.01249    0.01021 =
         0.01194   -0.00249   -0.00277   -0.00227
AFIX 137
H2A   2    0.367196    0.979637    0.549804    11.00000   -1.20000
H2B   2    0.270867    0.924727    0.609570    11.00000   -1.20000
H2C   2    0.209665    1.068267    0.585677    11.00000   -1.20000
AFIX   0
C1    1    0.254617    0.791389    0.419988    11.00000    0.01638    0.01958 =
         0.01843   -0.00941   -0.00624   -0.00288
AFIX  23
H1C   2    0.151598    0.779675    0.436679    11.00000   -1.20000
H1D   2    0.241669    0.869550    0.385645    11.00000   -1.20000
AFIX   0
C2    1    0.306911    0.819134    0.483267    11.00000    0.02728    0.02740 =
         0.02868   -0.01675   -0.01569    0.00394
AFIX  23
H2D   2    0.314582    0.742803    0.518635    11.00000   -1.20000
H2E   2    0.412585    0.825681    0.466869    11.00000   -1.20000
AFIX   0
C3    1    0.196189    0.946987    0.519028    11.00000    0.01746    0.01582 =
         0.01673   -0.00270   -0.00867   -0.00265
AFIX  23
H3A   2    0.172175    1.020715    0.482425    11.00000   -1.20000
H3B   2    0.096727    0.934482    0.544223    11.00000   -1.20000
AFIX   0
B1    3    0.172371    0.863100    0.220714    11.00000    0.00721    0.00856 =
         0.01405    0.00080   -0.00198   -0.00286
B2    3    0.440689    0.708418    0.161550    11.00000    0.00993    0.00877 =
         0.00955   -0.00061   -0.00124   -0.00416
B3    3    0.523430    0.442412    0.188623    11.00000    0.00946    0.00898 =
         0.00904   -0.00160    0.00025   -0.00242
B4    3    0.346556    0.341438    0.274394    11.00000    0.00793    0.00755 =
         0.01111    0.00050   -0.00259   -0.00267
B5    3    0.066212    0.501361    0.334785    11.00000    0.00732    0.00935 =
         0.01063   -0.00095    0.00041   -0.00360
B6    3   -0.020978    0.752051    0.305501    11.00000    0.00763    0.00994 =
         0.01026    0.00003   -0.00176   -0.00299
B7    3   -0.112303    0.944567    0.221166    11.00000    0.01118    0.00740 =
         0.01147   -0.00213   -0.00318   -0.00157
B8    3    0.413168    0.912708    0.218782    11.00000    0.01143    0.00802 =
         0.01030    0.00099   -0.00378   -0.00345
B9    3    0.597454    0.541031    0.066828    11.00000    0.00972    0.01105 =
         0.01042   -0.00167   -0.00249   -0.00387
B10   3    0.620599    0.283749    0.284987    11.00000    0.01036    0.00833 =
         0.01236   -0.00192   -0.00154   -0.00246
B11   3    0.111048    0.272033    0.299643    11.00000    0.01136    0.00917 =
         0.01065    0.00004   -0.00255   -0.00452
B12   3   -0.054988    0.663636    0.432139    11.00000    0.01277    0.01045 =
         0.01131   -0.00112   -0.00210   -0.00359

AFIX   6
O31   5    0.339929    0.280643    0.099389    11.00000    0.06252    0.03572 =
         0.01227    0.00374   -0.00890   -0.03545
H31A  2    0.346346    0.309631    0.138410    11.00000   -1.50000
H31B  2    0.272605    0.239447    0.113557    11.00000   -1.50000
AFIX   6

O32   5    0.399194    0.118849    0.429030    11.00000    0.01943    0.04109 =
         0.03151    0.02174    0.00037   -0.00229
H32A  2    0.351098    0.184614    0.456393    11.00000   -1.50000
H32B  2    0.428772    0.147989    0.387021    11.00000   -1.50000
AFIX   6

O33   5    0.696999    0.483949    0.385263    11.00000    0.01525    0.03352 =
         0.04269    0.00481   -0.00257   -0.00902
H33A  2    0.658216    0.421790    0.396274    11.00000   -1.50000
H33B  2    0.796458    0.449567    0.376470    11.00000   -1.50000
AFIX   6

O34   5    0.395451    0.431196    0.472390    11.00000    0.03997    0.02842 =
         0.04476    0.00334   -0.01603   -0.01480
H34A  2    0.361497    0.444018    0.516899    11.00000   -1.50000
H34B  2    0.354324    0.381193    0.459619    11.00000   -1.50000
AFIX   6

O35   5    0.578052    0.834814    0.357177    11.00000    0.03322    0.05580 =
         0.05146    0.00315   -0.00134   -0.01859
H35A  2    0.661294    0.837361    0.328352    11.00000   -1.50000
H35B  2    0.502135    0.906033    0.351218    11.00000   -1.50000
AFIX   0

N11   4    0.147711    0.617686    0.138030    11.00000    0.01465    0.01691 =
         0.03199   -0.01140   -0.00811   -0.00356
AFIX 137
H11A  2    0.214027    0.548054    0.110286    11.00000   -1.20000
H11B  2    0.119931    0.585882    0.183314    11.00000   -1.20000
H11C  2    0.196499    0.677007    0.138828    11.00000   -1.20000
AFIX   0
N12   4   -0.220178    0.585887    0.225047    11.00000    0.01252    0.01584 =
         0.01397    0.00230   -0.00431   -0.00759
AFIX 137
H12A  2   -0.289621    0.661204    0.208511    11.00000   -1.20000
H12B  2   -0.163905    0.609696    0.250203    11.00000   -1.20000
H12C  2   -0.273173    0.536110    0.254008    11.00000   -1.20000
AFIX   0
C11   1    0.005992    0.686036    0.108266    11.00000    0.01545    0.01879 =
         0.01307    0.00087   -0.00386   -0.00822
AFIX  23
H11D  2    0.034930    0.730942    0.061769    11.00000   -1.20000
H11E  2   -0.069851    0.756229    0.141026    11.00000   -1.20000
AFIX   0
C12   1   -0.071778    0.589749    0.097555    11.00000    0.01443    0.02462 =
         0.01440   -0.00400   -0.00343   -0.00853
AFIX  23
H12D  2   -0.169721    0.642465    0.081043    11.00000   -1.20000
H12E  2   -0.001531    0.529033    0.058996    11.00000   -1.20000
AFIX   0
C13   1   -0.111160    0.504575    0.163124    11.00000    0.01265    0.01348 =
         0.02044   -0.00310   -0.00480   -0.00609
AFIX  23
H13A  2   -0.159797    0.444883    0.150308    11.00000   -1.20000
H13B  2   -0.012825    0.446936    0.177983    11.00000   -1.20000
AFIX   6

PART 1
O42   5    0.787329    0.180723    0.068387    31.00000    0.02794    0.01125 =
         0.01178    0.00065   -0.00315   -0.00022
H42A  2    0.748633    0.261677    0.081261    31.00000   -1.50000
H42B  2    0.784864    0.128102    0.105080    31.00000   -1.50000
AFIX   6

O52   5    0.157645    1.126397    0.104388    21.00000    0.01104    0.01424 =
         0.01401    0.00115    0.00173   -0.00106
H52A  2    0.140567    1.079192    0.142087    21.00000   -1.50000
H52B  2    0.215713    1.074913    0.070528    21.00000   -1.50000
AFIX   6

PART 0
PART 2
O41   5    0.854727    0.210630    0.081115   -31.00000    0.01479    0.01498 =
         0.01586    0.00014   -0.00187   -0.00283
H41A  2    0.828113    0.164577    0.117733   -31.00000   -1.50000
H41B  2    0.849984    0.178822    0.043783   -31.00000   -1.50000
AFIX   6

O51   5    0.067668    1.193404    0.123976   -21.00000    0.04693    0.02191 =
         0.02969    0.00451   -0.00016   -0.01387
H51A  2    0.075879    1.123362    0.151124   -21.00000   -1.50000
H51B  2    0.070605    1.175200    0.081788   -21.00000   -1.50000
AFIX   0

PART 0
PART -1
N21   4    0.350915    0.831339   -0.007728    10.50000    0.02453    0.02151 =
         0.01672    0.00549   -0.01135   -0.01060
AFIX 137
H21A  2    0.432760    0.816284   -0.046069    10.50000   -1.20000
H21B  2    0.279406    0.798698   -0.015798    10.50000   -1.20000
H21C  2    0.386427    0.789144    0.031988    10.50000   -1.20000
AFIX   0
N22   4    0.628071    1.089340   -0.010449    10.50000    0.02421    0.01259 =
         0.01711   -0.00072   -0.00393   -0.00449
AFIX 137
H22A  2    0.707677    1.036350   -0.043082    10.50000   -1.20000
H22B  2    0.667841    1.108216    0.024057    10.50000   -1.20000
H22C  2    0.576486    1.167252   -0.032600    10.50000   -1.20000
AFIX   0
C21   1    0.276107    0.978009    0.003195    10.50000    0.02125    0.01946 =
         0.02678   -0.00434   -0.00390   -0.00398
AFIX  23
H21D  2    0.229501    0.993247    0.054612    10.50000   -1.20000
H21E  2    0.190528    1.015937   -0.023445    10.50000   -1.20000
AFIX   0
C22   1    0.393273    1.049953   -0.021932    10.50000    0.02700    0.01631 =
         0.02403    0.00296   -0.00801   -0.00709
AFIX  23
H22D  2    0.335297    1.148044   -0.021813    10.50000   -1.20000
H22E  2    0.446862    1.026476   -0.071938    10.50000   -1.20000
AFIX   0
C23   1    0.517102    1.017647    0.022745    10.50000    0.02213    0.01716 =
         0.02143    0.00356   -0.00717   -0.00553
AFIX  23
H23A  2    0.466513    1.046809    0.072215    10.50000   -1.20000
H23B  2    0.574457    0.919526    0.024608    10.50000   -1.20000
AFIX   0
HKLF 4

REM  2017ncs0216s_a.res in P-1
REM R1 =  0.0425 for    7654 Fo > 4sig(Fo)  and  0.0439 for all    7958 data
REM    590 parameters refined using      0 restraints

END

WGHT      0.0138      5.3813

REM Instructions for potential hydrogen bonds
HTAB O19 O20_$1
HTAB O20 O15_$2
HTAB O21 O31_$3
HTAB O22 O23_$4
HTAB O23 O9_$5
HTAB O24 O17_$6
HTAB N1 O34
HTAB N1 O33
HTAB N1 O35
HTAB N2 O32_$2
HTAB N2 O32_$7
HTAB N2 O22_$7
HTAB N2 O18_$8
HTAB C1 O18
HTAB C2 O35
HTAB C3 O32_$2
HTAB O31 O4
HTAB O31 O15
HTAB O31 O52_$5
HTAB O31 O51_$5
HTAB O32 O24_$6
HTAB O32 O14
HTAB O33 O22
HTAB O33 O34
HTAB O33 O16_$4
HTAB O34 O33_$7
HTAB O34 O24_$6
HTAB O35 O7_$4
HTAB O35 O20
HTAB O35 O32_$2
HTAB N11 O21_$3
HTAB N11 O6
HTAB N11 O2
HTAB N12 O10_$1
HTAB N12 O6
HTAB N12 O13_$1
HTAB N12 O33_$1
HTAB C13 O12_$1
HTAB C13 O13_$1
HTAB O42 O12
HTAB O42 O19_$9
HTAB O52 O8
HTAB O52 O9
HTAB O52 N22_$10
HTAB O41 O19_$9
HTAB O51 O8
HTAB N21 O31_$3
HTAB N21 O2
HTAB N21 O11
HTAB N22 O2_$10
HTAB N22 O11_$10
HTAB C23 O31_$2

REM Highest difference peak  0.869,  deepest hole -0.733,  1-sigma level  0.086
Q1    1   0.4051  0.1818  0.4490  11.00000  0.05    0.87
Q2    1   0.6828  0.5623  0.4040  11.00000  0.05    0.67
Q3    1   0.3292  0.6136  0.4081  11.00000  0.05    0.53
Q4    1   0.1471  1.1943  0.1360  11.00000  0.05    0.51
Q5    1   0.2889  0.1767  0.4502  11.00000  0.05    0.44
Q6    1   0.3533  0.8432  0.4548  11.00000  0.05    0.42
Q7    1   0.3835  0.6038  0.2434  11.00000  0.05    0.38
Q8    1   0.4756  0.8636  0.1858  11.00000  0.05    0.37
Q9    1   0.0125  0.6171  0.2472  11.00000  0.05    0.37
Q10   1   0.4610  0.6409  0.1907  11.00000  0.05    0.36
;
_shelx_res_checksum               49543
_shelx_hkl_file
;
   0   0   3  141.30    5.68
   0   0  -3  133.76    5.67
   0   0  -3  127.20    5.72
   0   0   3  154.54    6.03
   0   0  -3  149.70    5.32
   0   0  -3  161.08    5.95
   0   0  -3  144.68    5.76
   0   0   3  140.99    5.20
   0   0   3  134.94    5.64
   0   0   3  132.73    5.66
   0   0  -4 1042.76   31.11
   0   0  -4  972.25   30.64
   0   0   4 1105.82   29.99
   0   0   4 1077.89   30.84
   0   0   4 1023.14   30.98
   0   0  -4 1037.21   30.73
   0   0  -4 1039.78   29.93
   0   0   4 1014.79   30.66
   0   0   4 1113.11   31.13
   0   0  -4 1048.15   30.77
   0   0   5 1378.04   40.44
   0   0   5 1398.12   40.35
   0   0  -5 1401.13   40.37
   0   0   5 1358.86   40.59
   0   0  -5 1376.60   40.68
   0   0   5 1343.46   40.18
   0   0   5 1348.28   39.10
   0   0  -5 1463.30   40.68
   0   0  -5 1368.26   39.19
   0   0   6   20.24    2.45
   0   0  -6   22.56    2.55
   0   0   6   25.63    2.70
   0   0   6   22.99    2.57
   0   0   6   21.48    2.09
   0   0   6   16.07    2.18
   0   0  -6   26.36    2.35
   0   0  -6   20.66    2.41
   0   0  -6   24.09    2.66
   0   0  -6   25.86    2.85
   0   0  -7  706.28   21.36
   0   0   7  624.70   22.19
   0   0   7  644.49   22.73
   0   0  -7  658.43   22.49
   0   0   7  720.20   23.10
   0   0   7  634.48   20.90
   0   0   7  637.19   22.25
   0   0  -7  642.18   22.92
   0   0  -7  621.86   22.29
   0   0   8 1214.45   37.50
   0   0   8 1203.56   35.82
   0   0  -8 1154.88   35.53
   0   0  -8 1117.62   37.70
   0   0   8 1208.93   37.63
   0   0   8 1117.07   36.99
   0   0   8 1280.27   38.43
   0   0  -8 1222.63   37.64
   0   0  -8 1134.87   37.07
   0   0   9  154.88    8.85
   0   0  -9  147.58    8.77
   0   0  -9  153.57    9.34
   0   0   9  149.27    7.71
   0   0   9  144.63    8.76
   0   0  -9  150.23    7.68
   0   0   9  151.52    8.78
   0   0   9  151.09    9.04
   0   0  10 8250.24  233.24
   0   0 -10 8625.05  235.86
   0   0  10 8574.39  236.82
   0   0  10 9100.98  236.42
   0   0 -10 8640.30  236.96
   0   0 -10 8683.32  233.65
   0   0 -10 8442.99  235.96
   0   0  10 8478.91  235.93
   0   0 -11   99.16    7.49
   0   0 -11   97.67    7.72
   0   0 -11  101.30    6.60
   0   0  11   91.92    7.29
   0   0  11   98.61    7.57
   0   0 -11  109.40    8.43
   0   0  11   85.74    6.01
   0   0  11  104.20    7.88
   0   0  12  205.47   12.23
   0   0  12  185.95    9.66
   0   0  12  178.22   11.33
   0   0 -12  193.43   11.40
   0   0 -12  166.11   10.84
   0   0 -12  183.58    9.84
   0   0 -12  171.36   11.48
   0   0  12  212.48   11.99
   0   0  12  192.18   11.48
   0   0 -13  730.55   25.96
   0   0  13  739.08   25.84
   0   0  13  724.86   29.17
   0   0 -13  711.61   28.09
   0   0  13  723.93   28.31
   0   0  13  778.19   29.24
   0   0 -13  688.25   28.95
   0   0  13  727.77   28.43
   0   0 -13  678.78   27.87
   0   0  14  304.39   14.05
   0   0 -14  286.81   15.83
   0   0  14  276.18   15.84
   0   0 -14  298.98   14.10
   0   0  14  304.63   16.25
   0   0 -14  304.86   16.14
   0   0 -14  299.27   16.87
   0   0  14  300.97   16.81
   0   0  14  276.76   15.64
   0   0  15  653.19   27.73
   0   0  15  684.46   25.24
   0   0 -15  662.15   25.14
   0   0  15  636.75   27.98
   0   0 -15  703.36   28.28
   0   0  15  738.59   28.91
   0   0 -15  694.29   29.79
   0   0 -15  568.37   26.74
   0   0  15  664.20   28.85
   0   0  16   35.59    5.42
   0   0 -16   39.09    5.64
   0   0 -16   39.15    5.58
   0   0  16   33.38    5.28
   0   0  16   32.80    5.04
   0   0 -16   29.60    4.09
   0   0  16   41.05    4.64
   0   0  17   49.89    6.55
   0   0 -17   49.22    5.46
   0   0  17   57.69    7.11
   0   0 -17   47.03    6.49
   0   0 -17   59.29    7.16
   0   0  17   56.16    5.73
   0   0 -18    4.37    1.99
   0   0  18    3.76    2.66
   0   0 -18    2.65    0.96
   0   0  18    4.20    1.72
   0   0  18    3.78    2.60
   0   0 -18    1.68    1.34
   0   0  18    0.77    1.35
   0   0  19   82.11    7.35
   0   0  19   78.30    9.15
   0   0  19   84.71    9.64
   0   0 -19   81.19    8.95
   0   0 -19   80.78    9.07
   0   0  20   16.23    3.52
   0   0 -20   24.09    4.94
   0   0  20   12.79    4.01
   0   0 -20   16.30    4.12
   0   0  21   20.78    3.94
   0   0 -21   21.75    4.72
   0   0 -21   17.53    4.35
   0   0 -22   52.15    7.83
   0   0  22   77.57    9.61
   0   0  22   76.23    7.47
   0   0 -22   61.26    8.46
   0   0 -23   27.66    5.86
   0   0  23   33.50    6.55
   0   0 -23   22.85    5.30
   0   0  24   17.54    5.32
   0   0 -24   22.61    5.54
   0   0 -24   16.40    4.59
   0   1 -23   28.91    5.73
   0   1 -23   29.09    6.37
   0  -1  23   37.17    6.90
   0  -1  22  107.24    9.41
   0   1 -22  108.68   11.03
   0   1 -22  131.09   12.97
   0  -1  22  130.78   12.74
   0  -1  21   23.45    4.25
   0   1 -21   20.03    4.69
   0  -1  21   23.99    5.07
   0   1 -21   22.11    4.97
   0  -1  20  194.48   15.04
   0   1 -20  197.81   14.39
   0   1 -20  174.19   14.53
   0  -1  20  200.13   12.74
   0   1 -19   19.09    3.77
   0  -1  19   23.58    3.83
   0  -1  19   25.13    5.13
   0   1 -19   21.85    4.51
   0   1 -19   28.06    5.04
   0   1 -18    0.60    1.71
   0  -1  18    2.64    2.23
   0   1 -18   -0.18    1.39
   0  -1  18    3.22    1.80
   0   1 -18    4.80    2.45
   0  -1  18    0.71    1.51
   0   1 -17   35.11    4.79
   0   1 -17   42.06    6.28
   0  -1  17   40.44    4.88
   0  -1  17   30.82    5.27
   0  -1  17   37.67    5.89
   0   1 -17   45.96    5.91
   0   1 -16  107.40    8.19
   0  -1  16   94.34    7.57
   0   1 -16   86.60    8.82
   0  -1  16   91.27    8.56
   0   1 -16   95.34    8.62
   0  -1  16  105.15    9.43
   0   1 -15   41.80    5.26
   0   1 -15   30.78    5.44
   0  -1  15   24.11    3.59
   0  -1  15   28.74    4.42
   0   1 -15   29.52    4.15
   0   1 -15   29.97    4.85
   0  -1  14  182.89   12.65
   0   1 -14  173.71   10.36
   0  -1  14  193.55   12.89
   0  -1  14  178.41   10.33
   0   1 -14  174.27   12.19
   0  -1  14  167.76   11.17
   0   1 -14  195.91   11.85
   0   1 -14  184.73   12.78
   0   1 -13   82.24    6.53
   0  -1  13   82.73    7.89
   0  -1  13   79.39    6.37
   0   1 -13   88.97    7.61
   0   1 -13   93.03    8.23
   0  -1  13   75.87    7.74
   0   1 -13   93.54    8.52
   0   1 -13   97.03    7.60
   0  -1  13   87.24    7.37
   0  -1  12  233.91   13.64
   0   1 -12  233.98   11.80
   0  -1  12  227.71   12.55
   0   1 -12  252.92   12.87
   0   1 -12  240.89   13.15
   0   1 -12  239.31   13.95
   0   1 -12  232.08   13.39
   0  -1  12  243.97   13.97
   0  -1  12  244.09   11.76
   0   1 -11   45.89    4.68
   0  -1  11   32.49    3.69
   0  -1  11   30.90    4.14
   0  -1  11   34.52    4.23
   0  -1  11   28.20    4.26
   0  -1  11   44.58    5.26
   0   1 -11   40.84    4.95
   0   1 -11   35.25    4.63
   0   1 -11   41.45    4.15
   0   1 -11   41.16    4.63
   0   1 -10  344.58   15.85
   0  -1  10  315.58   14.15
   0   1 -10  302.68   13.24
   0   1 -10  334.45   14.85
   0  -1  10  317.65   15.29
   0  -1  10  301.53   15.08
   0   1 -10  324.58   15.24
   0  -1  10  308.11   14.47
   0  -1  10  306.02   13.24
   0   1 -10  301.39   13.86
   0   1  -9   26.87    3.64
   0   1  -9   28.33    3.74
   0  -1   9   34.74    3.74
   0   1  -9   38.18    3.60
   0   1  -9   29.57    3.54
   0  -1   9   32.24    3.95
   0   1  -9   27.11    3.26
   0  -1   9   31.14    3.24
   0  -1   9   22.96    3.26
   0  -1   9   35.02    4.12
   0  -1   8  214.66    9.66
   0   1  -8  232.24   10.37
   0  -1   8  226.07   10.39
   0  -1   8  213.69   11.02
   0  -1   8  224.61   10.72
   0   1  -8  239.15   11.62
   0   1  -8  216.00   10.48
   0   1  -8  217.22    9.74
   0   1  -8  181.83   10.33
   0  -1   8  222.82   11.24
   0   1  -7   44.55    4.18
   0   1  -7   49.25    3.85
   0   1  -7   47.41    3.65
   0   1  -7   36.71    3.81
   0   1  -7   39.87    3.70
   0  -1   7   39.63    3.31
   0  -1   7   40.11    3.99
   0  -1   7   52.79    4.61
   0  -1   7   38.55    3.49
   0  -1   6 1508.93   43.69
   0   1  -6 1474.48   44.90
   0   1  -6 1539.64   43.72
   0  -1   6 1430.90   44.84
   0   1  -6 1501.77   44.19
   0  -1   6 1433.62   44.10
   0  -1   6 1434.01   43.17
   0   1  -6 1556.82   43.53
   0   1  -6 1472.42   44.96
   0  -1   6 1588.95   45.34
   0   1  -5 4010.61  109.00
   0  -1   5 4001.51  109.04
   0   1  -5 4037.92  110.51
   0  -1   5 3898.87  109.58
   0   1  -5 3819.63  110.24
   0  -1   5 4007.06  110.57
   0   1  -5 3943.10  109.60
   0  -1   5 3822.22  108.80
   0   1  -5 4268.83  109.26
   0  -1   4 5169.85  141.95
   0   1  -4 5398.40  140.80
   0  -1   4 5146.59  140.54
   0  -1   4 5572.69  141.46
   0   1  -3  978.87   27.71
   0  -1   3  864.23   26.78
   0   1  -3  880.50   26.96
   0  -1   3  993.07   27.78
   0   1  -3  884.94   26.81
   0   1  -3  920.64   26.34
   0  -1   3  932.74   26.43
   0   1  -3  958.60   26.77
   0  -1   3  882.73   26.55
   0  -1   2  551.47   17.09
   0   1  -2  555.09   17.56
   0   1  -2  616.60   17.60
   0  -1   2  551.97   17.32
   0   1  -2  631.05   17.48
   0   1  -2  558.42   17.08
   0  -1   2  566.26   17.20
   0  -1   2  565.26   17.63
   0  -1   1   -0.25    0.23
   0   1   2  348.34   11.45
   0   1   2  354.09   11.68
   0   1   2  362.70   12.03
   0  -1  -2  350.49   11.96
   0  -1  -2  387.10   11.98
   0  -1  -2  362.32   11.56
   0  -1  -3  811.57   25.52
   0  -1  -3  887.04   24.94
   0   1   3  881.79   26.19
   0  -1  -3  841.71   25.95
   0  -1  -3  828.15   25.24
   0   1   3  836.32   25.20
   0   1   4   59.66    3.30
   0  -1  -4   61.92    4.11
   0   1   4   57.03    3.57
   0  -1  -4   60.10    3.95
   0  -1  -4   58.72    3.61
   0  -1  -4   62.37    3.53
   0   1   4   56.97    3.81
   0   1   4   60.39    4.03
   0  -1  -5 1656.10   52.20
   0   1   5 1823.15   52.60
   0   1   5 1884.05   52.41
   0  -1  -5 1799.65   51.46
   0  -1  -5 1752.41   52.12
   0   1   5 1809.10   51.26
   0   1   5 1825.83   50.70
   0  -1  -5 1877.02   51.40
   0   1   6   40.30    2.98
   0  -1  -6   38.39    3.31
   0   1   6   32.29    3.25
   0  -1  -6   33.88    3.54
   0  -1  -6   33.38    3.40
   0  -1  -6   36.83    3.16
   0   1   6   41.71    3.80
   0   1   6   38.16    3.22
   0   1   7  623.11   20.80
   0  -1  -7  596.73   21.55
   0   1   7  594.48   19.51
   0   1   7  581.32   21.52
   0   1   7  569.13   21.16
   0   1   7  554.57   20.93
   0  -1  -7  605.00   21.62
   0  -1  -7  585.46   20.46
   0  -1  -8 1776.90   53.12
   0   1   8 1799.27   54.55
   0  -1  -8 1872.62   53.50
   0  -1  -8 1790.70   54.53
   0   1   8 1748.28   53.83
   0  -1  -8 1710.74   54.15
   0   1   8 1928.40   54.79
   0   1   8 1810.66   51.81
   0   1   8 1712.06   53.04
   0   1   9   10.43    2.02
   0  -1  -9   13.86    2.39
   0   1   9   14.05    2.46
   0   1   9   13.40    2.38
   0  -1  -9   10.12    2.28
   0   1   9   12.51    1.97
   0  -1  -9   12.83    2.47
   0   1   9    8.04    1.82
   0  -1  -9    9.70    1.90
   0   1  10 2818.62   86.24
   0  -1 -10 2735.82   85.00
   0   1  10 3040.45   87.31
   0   1  10 3033.36   86.52
   0   1  10 2811.23   83.35
   0   1  10 3114.39   86.17
   0  -1 -10 2780.31   86.37
   0  -1 -10 2916.34   86.91
   0  -1 -11  477.24   20.21
   0   1  11  510.46   21.39
   0   1  11  503.77   21.65
   0  -1 -11  578.27   22.92
   0  -1 -11  585.32   22.82
   0   1  11  557.73   22.33
   0   1  11  512.79   21.06
   0   1  11  521.60   19.31
   0  -1 -11  517.04   20.92
   0   1  12   52.96    4.79
   0   1  12   57.11    5.73
   0  -1 -12   63.70    6.42
   0  -1 -12   43.53    5.54
   0   1  12   59.58    6.19
   0   1  12   53.61    6.03
   0  -1 -12   63.06    6.03
   0  -1 -12   52.29    5.48
   0   1  12   56.65    5.82
   0  -1 -13 1305.57   45.79
   0  -1 -13 1277.10   44.13
   0   1  13 1346.31   45.09
   0  -1 -13 1394.02   45.22
   0  -1 -13 1359.38   46.71
   0   1  13 1340.89   45.52
   0   1  13 1357.32   46.15
   0   1  13 1338.81   46.20
   0   1  13 1339.74   42.22
   0   1  14  567.49   21.74
   0  -1 -14  539.32   25.27
   0   1  14  570.38   25.31
   0   1  14  588.88   25.37
   0   1  14  552.71   24.52
   0   1  14  578.64   24.58
   0  -1 -14  571.04   23.88
   0  -1 -14  568.18   25.10
   0  -1 -14  615.24   24.80
   0  -1 -15  208.50   13.81
   0  -1 -15  205.23   14.20
   0   1  15  239.13   14.21
   0  -1 -15  214.87   13.08
   0   1  15  233.37   14.63
   0  -1 -15  231.33   13.89
   0   1  15  227.45   14.43
   0   1  15  206.81   11.31
   0   1  15  202.51   13.49
   0  -1 -16  181.77   12.58
   0  -1 -16  174.93   12.22
   0   1  16  199.76   13.88
   0   1  16  199.97   13.37
   0  -1 -16  191.22   13.44
   0   1  16  187.82   13.26
   0   1  16  203.77   11.27
   0   1  17   33.35    5.67
   0   1  17   25.71    5.07
   0  -1 -17   34.17    5.46
   0  -1 -17   39.44    5.86
   0   1  17   37.71    5.78
   0   1  17   46.82    5.11
   0   1  17   40.04    6.18
   0   1  18   27.15    4.03
   0   1  18   23.73    4.83
   0  -1 -18   33.53    5.60
   0   1  18   32.26    5.79
   0  -1 -18   27.06    4.68
   0   1  19  141.23   12.77
   0  -1 -19  132.03   11.59
   0  -1 -19  154.45   12.78
   0   1  19  138.13   12.22
   0   1  19  136.35    9.80
   0  -1 -20  269.14   17.97
   0  -1 -20  249.57   16.77
   0   1  20  237.01   13.69
   0   1  20  231.30   16.98
   0   1  21  169.71   11.61
   0   1  21  159.66   14.11
   0  -1 -21  187.86   15.26
   0  -1 -21  172.95   13.83
   0  -1 -22   12.25    4.52
   0   1  22    5.00    2.91
   0   1  22    9.39    2.62
   0  -1 -22    9.48    3.40
   0   1  22    3.41    2.43
   0  -1 -23  108.70   11.97
   0   1  23  119.61   13.15
   0  -1 -23  134.20   12.97
   0   1  23  140.05   13.75
   0  -1 -24   20.99    5.29
   0  -1 -24   24.04    5.87
   0   2 -23  156.89   14.67
   0   2 -23  140.59   14.47
   0  -2  23  152.63   14.33
   0   2 -22  187.90   14.38
   0   2 -22  211.22   16.80
   0   2 -22  197.86   16.52
   0  -2  22  165.59   14.91
   0  -2  22  180.22   12.86
   0  -2  21  330.55   18.13
   0   2 -21  341.21   21.53
   0  -2  21  313.15   20.49
   0   2 -21  333.98   19.27
   0  -2  20    4.11    2.44
   0  -2  20   15.36    3.37
   0   2 -20   10.04    3.77
   0   2 -20   10.34    3.47
   0   2 -20   10.19    3.77
   0  -2  19  256.15   17.18
   0   2 -19  257.56   17.84
   0   2 -19  252.50   15.69
   0   2 -19  248.81   17.06
   0  -2  19  220.45   15.36
   0  -2  19  279.87   15.43
   0   2 -18   18.02    4.38
   0  -2  18   17.09    3.76
   0   2 -18   11.72    2.90
   0   2 -18   17.18    3.70
   0  -2  18   21.22    3.87
   0   2 -18   14.57    4.00
   0   2 -17  635.82   29.78
   0   2 -17  643.16   26.69
   0  -2  17  626.54   26.12
   0   2 -17  705.51   28.07
   0  -2  17  639.35   27.67
   0   2 -16  218.27   14.99
   0   2 -16  198.91   13.60
   0   2 -16  192.58   12.12
   0  -2  16  208.22   12.27
   0  -2  16  190.73   12.63
   0   2 -16  209.91   12.84
   0   2 -15  192.69   11.81
   0   2 -15  183.46   13.42
   0  -2  15  203.92   13.40
   0   2 -15  224.58   12.85
   0   2 -15  201.47   13.17
   0  -2  15  202.12   12.59
   0  -2  15  217.99   12.26
   0   2 -14  707.55   26.86
   0   2 -14  712.47   28.64
   0   2 -14  645.09   28.90
   0  -2  14  709.69   28.67
   0  -2  14  715.53   27.70
   0  -2  14  733.59   30.60
   0   2 -14  707.33   27.16
   0  -2  14  689.00   26.41
   0   2 -14  699.15   30.02
   0  -2  13  220.96   13.37
   0  -2  13  225.49   12.23
   0   2 -13  216.83   13.91
   0   2 -13  239.10   13.88
   0  -2  13  259.52   13.46
   0  -2  13  278.79   15.92
   0   2 -13  233.89   12.56
   0   2 -13  260.95   13.03
   0   2 -13  228.34   14.52
   0   2 -12  134.32    8.56
   0  -2  12  124.05    9.05
   0  -2  12  131.11   10.06
   0   2 -12  118.50    9.54
   0  -2  12  103.74    7.62
   0   2 -12  126.07    8.34
   0   2 -12  123.20    9.51
   0   2 -12  131.93    9.18
   0  -2  12  116.73    8.25
   0   2 -11   10.53    2.22
   0  -2  11   12.19    2.38
   0   2 -11   13.78    2.46
   0  -2  11    9.79    2.18
   0   2 -11    8.64    1.95
   0   2 -11   10.92    2.73
   0   2 -11   11.39    2.34
   0  -2  11   10.74    2.86
   0   2 -10    9.88    2.36
   0   2 -10    6.93    1.92
   0   2 -10    6.53    2.23
   0  -2  10    4.80    1.99
   0   2 -10    8.53    2.30
   0   2 -10    5.47    1.64
   0  -2  10    7.42    1.83
   0  -2   9   31.54    3.44
   0  -2   9   35.43    4.59
   0  -2   9   28.64    3.26
   0   2  -9   26.58    3.75
   0   2  -9   27.34    3.20
   0   2  -9   26.69    3.52
   0   2  -9   29.83    3.73
   0   2  -9   29.61    3.34
   0   2  -9   30.34    3.96
   0  -2   9   25.63    3.50
   0  -2   8  681.57   23.44
   0  -2   8  671.36   25.35
   0  -2   8  647.13   22.98
   0   2  -8  671.07   23.48
   0  -2   8  718.89   24.67
   0   2  -8  669.98   25.18
   0   2  -8  759.56   24.82
   0   2  -8  646.88   22.68
   0   2  -8  645.79   24.80
   0   2  -8  707.11   24.75
   0  -2   7  432.95   16.71
   0   2  -7  469.79   17.78
   0  -2   7  416.80   16.36
   0   2  -7  479.16   17.62
   0  -2   7  470.46   18.68
   0   2  -7  455.70   18.30
   0   2  -7  492.00   17.31
   0   2  -7  448.21   18.28
   0   2  -7  476.85   16.55
   0  -2   7  446.21   17.40
   0   2  -6 1792.05   54.59
   0  -2   6 1802.35   52.60
   0   2  -6 1900.17   55.15
   0   2  -6 1858.01   54.13
   0   2  -6 1831.39   53.22
   0  -2   6 1941.90   55.44
   0  -2   6 1731.04   53.69
   0  -2   5 6279.87  183.07
   0   2  -5 6231.45  184.02
   0   2  -5 6530.36  183.93
   0  -2   5 6921.48  185.88
   0   2  -5 6991.18  185.92
   0  -2   5 6733.08  184.61
   0  -2   4 4774.44  136.19
   0   2  -4 4680.48  134.88
   0   2  -4 4818.64  135.78
   0  -2   4 4910.53  135.37
   0  -2   4 4950.37  135.17
   0  -2   4 5358.79  136.09
   0  -2   4 5245.52  134.54
   0   2  -4 4681.80  135.13
   0   2  -3  250.42   10.16
   0  -2   3  255.35   10.15
   0  -2   3  255.78   10.00
   0   2  -3  269.87   10.11
   0  -2   3  277.03   10.14
   0  -2   2  126.32    6.09
   0  -2   2  108.07    5.94
   0   2  -2  114.54    5.68
   0   2  -2  121.17    6.00
   0   2  -2  135.73    6.09
   0   2  -2  122.65    6.12
   0  -2   2  111.85    5.93
   0  -2   2  126.94    5.96
   0   2  -1  654.48   19.93
   0  -2   1  658.68   20.12
   0  -2   1  668.50   20.28
   0  -2   1  544.66   19.41
   0  -2   1  681.66   20.02
   0   2  -1  651.07   20.16
   0   2  -1  736.90   20.37
   0   2  -1  661.89   20.11
   0   2  -1  762.91   20.35
   0  -2   0    3.78    0.93
   0   2   0    5.44    1.08
   0  -2   0    5.75    1.09
   0  -2   0    5.93    1.12
   0  -2   0    5.70    1.09
   0   2   0    4.73    0.92
   0  -2   0    5.05    0.95
   0   2   0    6.06    1.15
   0   2   0    4.67    0.98
   0  -2   0    5.98    1.17
   0   2   0    5.91    1.09
   0  -2  -1    5.36    1.07
   0   2   1    4.46    0.95
   0   2   1    4.65    0.84
   0   2   1    5.27    1.07
   0   2   1    4.06    0.91
   0  -2  -1    7.07    1.16
   0   2   1    5.83    1.14
   0   2   1    3.32    0.87
   0  -2  -1    4.96    1.04
   0  -2  -1    4.47    0.78
   0   2   2  322.64   12.24
   0   2   2  362.75   12.31
   0  -2  -2  344.86   12.85
   0  -2  -2  316.96   11.83
   0   2   2  319.84   12.46
   0  -2  -2  336.79   12.43
   0  -2  -2  376.29   12.49
   0   2   2  334.14   12.07
   0  -2  -3 3609.09   95.05
   0   2   3 3425.28   93.78
   0  -2  -3 3538.19   94.36
   0   2   3 3516.34   94.85
   0   2   3 3444.35   94.21
   0   2   4  182.69    8.20
   0  -2  -4  192.53    9.15
   0   2   4  182.25    8.94
   0   2   4  200.44    8.86
   0  -2  -4  172.39    8.15
   0  -2  -4  184.58    8.59
   0   2   5 6655.12  190.12
   0  -2  -5 6425.04  188.58
   0  -2  -5 7399.99  190.02
   0   2   5 6140.49  188.84
   0   2   5 7548.79  189.32
   0  -2  -5 6535.02  190.02
   0  -2  -6 2666.89   78.18
   0  -2  -6 2612.09   78.84
   0  -2  -6 2752.12   77.58
   0   2   6 2643.31   78.87
   0   2   6 2612.02   77.92
   0  -2  -6 2871.08   76.73
   0   2   6 2910.62   77.89
   0   2   7  501.81   18.39
   0   2   7  511.79   19.82
   0   2   7  494.42   18.84
   0  -2  -7  466.32   19.36
   0   2   7  465.65   17.06
   0  -2  -7  508.49   18.42
   0  -2  -7  506.75   19.16
   0  -2  -7  511.93   17.76
   0   2   8  644.80   24.22
   0  -2  -8  586.54   21.51
   0  -2  -8  664.30   24.39
   0  -2  -8  626.83   23.47
   0  -2  -8  625.86   22.51
   0   2   8  617.82   21.24
   0   2   8  674.00   23.70
   0  -2  -9 8219.55  218.29
   0   2   9 7698.74  213.77
   0   2   9 8121.27  216.95
   0  -2  -9 7737.98  214.81
   0   2   9 7626.61  217.48
   0  -2  -9 7997.63  217.28
   0  -2  -9 7646.35  215.51
   0  -2 -10   82.49    7.29
   0  -2 -10  102.91    7.21
   0   2  10   86.78    7.17
   0  -2 -10   88.78    6.48
   0   2  10   88.52    7.59
   0  -2 -10   93.10    7.53
   0   2  10   81.62    5.77
   0   2  11  961.42   35.11
   0   2  11  964.32   31.29
   0  -2 -11  915.13   34.50
   0   2  11  901.37   33.66
   0   2  11  973.48   34.35
   0  -2 -11  939.72   34.38
   0  -2 -11  963.50   32.73
   0  -2 -11  965.51   33.09
   0  -2 -12  423.54   20.42
   0  -2 -12  473.00   19.52
   0   2  12  479.45   21.59
   0   2  12  432.08   20.21
   0  -2 -12  484.37   20.03
   0   2  12  425.59   20.08
   0  -2 -12  454.24   21.14
   0   2  12  453.01   17.90
   0   2  13  465.00   21.05
   0  -2 -13  413.67   20.82
   0  -2 -13  462.75   19.99
   0  -2 -13  469.31   19.90
   0  -2 -13  412.97   20.67
   0   2  13  420.78   17.69
   0   2  13  431.68   20.53
   0   2  13  433.79   21.28
   0   2  14 1091.14   40.96
   0   2  14 1041.72   39.63
   0  -2 -14 1058.82   38.49
   0  -2 -14 1028.18   37.89
   0   2  14 1164.80   40.83
   0  -2 -14 1156.31   41.49
   0   2  14 1133.51   36.63
   0  -2 -14 1036.73   40.30
   0  -2 -15  141.49   11.68
   0   2  15  145.07   11.72
   0   2  15  158.48   11.75
   0   2  15  139.99    9.04
   0  -2 -15  136.70   10.37
   0  -2 -15  145.32   10.32
   0   2  15  156.24   11.63
   0  -2 -16  438.48   21.36
   0   2  16  423.09   23.11
   0   2  16  454.60   23.16
   0   2  16  495.33   23.48
   0   2  16  496.72   20.08
   0  -2 -16  461.56   23.67
   0   2  17   14.70    3.79
   0   2  17   19.45    4.36
   0   2  17   18.68    3.14
   0  -2 -17   16.98    3.84
   0  -2 -17   18.75    4.45
   0   2  18  122.81    8.90
   0   2  18  109.99   10.74
   0   2  18  120.32   11.26
   0  -2 -18  119.71   10.47
   0  -2 -19  535.67   25.01
   0   2  19  484.69   21.44
   0   2  19  453.64   25.01
   0   2  19  471.76   25.89
   0  -2 -19  514.23   26.81
   0  -2 -20    9.14    2.95
   0   2  20   13.07    4.30
   0  -2 -20   13.21    4.16
   0   2  20   12.19    3.10
   0   2  20   11.92    3.14
   0  -2 -21  185.04   14.26
   0   2  21  167.49   14.62
   0  -2 -21  203.43   16.30
   0   2  21  194.34   16.16
   0   2  21  169.53   11.54
   0   2  22   68.88    9.42
   0   2  22   56.49    6.38
   0  -2 -22   90.61   10.75
   0   2  22   74.50   10.01
   0  -2 -22   63.37    8.21
   0   2  23  125.27   13.62
   0  -2 -23  113.33   12.46
   0   2  23  120.11   12.76
   0  -2 -23  101.83   10.95
   0  -2 -24  260.03   18.83
   0   2  24  301.56   21.43
   0  -2 -24  293.74   21.57
   0   3 -23    8.83    3.53
   0   3 -23    0.51    2.25
   0  -3  23    6.65    3.33
   0   3 -22   55.79    8.93
   0  -3  22   62.79    9.20
   0  -3  22   50.98    7.04
   0   3 -22   55.05    8.61
   0  -3  21    7.18    2.82
   0   3 -21   16.18    4.80
   0   3 -21   15.62    4.47
   0  -3  20   17.17    4.49
   0  -3  20   16.97    4.06
   0   3 -20   13.06    4.14
   0   3 -20    8.51    3.68
   0   3 -19   36.74    6.25
   0   3 -19   40.55    7.10
   0  -3  19   42.00    5.91
   0  -3  19   50.45    7.32
   0   3 -18  378.07   22.64
   0  -3  18  386.27   20.31
   0   3 -18  347.63   19.34
   0  -3  18  449.05   20.88
   0  -3  18  398.25   22.11
   0   3 -18  440.79   23.17
   0   3 -17   45.64    5.86
   0  -3  17   38.30    5.59
   0  -3  17   52.41    7.01
   0  -3  17   48.68    6.00
   0   3 -17   65.60    7.76
   0  -3  16   61.69    6.73
   0  -3  16   68.55    6.85
   0   3 -16   62.23    6.71
   0   3 -16   59.50    7.21
   0  -3  16   62.32    7.59
   0   3 -15 1506.60   51.61
   0   3 -15 1406.03   52.24
   0  -3  15 1508.07   48.94
   0   3 -15 1400.54   50.17
   0  -3  15 1440.49   50.74
   0  -3  15 1528.62   49.18
   0   3 -15 1364.42   48.28
   0   3 -14  263.57   15.48
   0  -3  14  244.25   13.62
   0   3 -14  258.21   14.19
   0  -3  14  254.52   15.06
   0   3 -14  224.25   15.32
   0   3 -14  232.54   14.36
   0  -3  14  274.24   14.35
   0  -3  13  608.31   27.78
   0   3 -13  606.39   27.54
   0   3 -13  707.15   28.82
   0   3 -13  614.93   25.96
   0   3 -13  603.64   26.27
   0   3 -13  610.18   24.77
   0  -3  13  585.56   24.48
   0  -3  13  683.22   25.38
   0  -3  13  639.84   26.52
   0  -3  12    4.17    1.54
   0  -3  12    6.09    2.41
   0   3 -12    5.22    1.84
   0   3 -12    3.31    1.51
   0   3 -12    3.63    1.56
   0   3 -12    3.41    1.50
   0  -3  12    5.27    2.02
   0   3 -12    4.31    2.22
   0  -3  12    5.75    1.93
   0  -3  11  808.98   32.67
   0   3 -11  881.26   33.01
   0   3 -11  850.93   31.15
   0   3 -11  812.80   32.36
   0  -3  11  820.61   31.09
   0  -3  11  845.28   30.12
   0   3 -11  858.53   30.25
   0   3 -11  853.08   31.75
   0  -3  10   22.95    3.24
   0   3 -10   21.91    3.22
   0   3 -10   25.37    4.21
   0   3 -10   19.64    3.25
   0  -3  10   23.78    3.63
   0   3 -10   21.96    3.61
   0  -3  10   26.37    4.22
   0  -3  10   23.87    3.19
   0   3 -10   22.48    3.44
   0  -3   9 1309.83   43.46
   0  -3   9 1192.96   41.17
   0  -3   9 1273.02   40.63
   0   3  -9 1337.86   42.35
   0  -3   9 1196.86   39.47
   0   3  -9 1283.16   41.39
   0   3  -9 1279.67   42.81
   0   3  -9 1253.82   40.43
   0  -3   8  185.14    9.36
   0   3  -8  177.50   10.20
   0   3  -8  174.02    9.59
   0  -3   8  161.50    9.69
   0   3  -8  164.66   10.38
   0  -3   8  178.06    9.70
   0  -3   8  171.44   10.76
   0  -3   7   57.02    5.57
   0   3  -7   59.64    5.62
   0   3  -7   51.60    4.73
   0  -3   7   51.91    4.79
   0  -3   7   48.55    4.18
   0   3  -7   58.88    4.98
   0   3  -7   57.60    5.31
   0  -3   7   50.79    4.63
   0  -3   6   32.71    3.66
   0  -3   6   40.03    4.36
   0  -3   6   38.95    3.92
   0  -3   6   30.54    3.09
   0   3  -6   33.56    3.55
   0   3  -6   34.25    3.85
   0   3  -6   33.04    3.96
   0  -3   5 1560.01   47.17
   0   3  -5 1490.56   46.90
   0   3  -5 1556.34   47.67
   0   3  -5 1499.35   46.55
   0  -3   5 1687.00   47.35
   0   3  -5 1523.94   46.37
   0  -3   5 1509.53   47.67
   0  -3   5 1526.19   46.60
   0  -3   4  805.85   27.16
   0  -3   4  834.69   28.02
   0  -3   4  888.98   28.00
   0   3  -4  767.34   27.67
   0   3  -4  936.58   27.92
   0  -3   4  771.89   26.98
   0  -3   3  496.54   18.56
   0  -3   3  537.03   18.87
   0  -3   3  506.64   19.35
   0  -3   3  481.99   18.65
   0   3  -3  559.91   19.32
   0   3  -3  523.74   18.64
   0   3  -3  505.37   18.36
   0   3  -3  515.27   19.08
   0   3  -2  678.27   22.30
   0  -3   2  692.00   22.86
   0  -3   2  598.66   22.48
   0  -3   2  643.45   22.35
   0   3  -2  701.57   22.58
   0   3  -2  738.83   23.17
   0  -3   2  667.98   22.50
   0   3  -2  639.97   22.43
   0   3  -1 1041.10   30.65
   0   3  -1 1079.04   30.51
   0  -3   1  966.69   30.11
   0  -3   1  905.72   30.20
   0  -3   1 1001.34   30.48
   0  -3   1  817.85   29.38
   0   3  -1  915.75   29.94
   0   3  -1  966.19   29.81
   0   3  -1  930.10   29.92
   0  -3   1  951.99   29.80
   0  -3   0   40.94    3.64
   0  -3   0   39.46    3.62
   0  -3   0   46.08    3.85
   0   3   0   46.33    3.83
   0   3   0   45.95    3.73
   0   3   0   43.00    3.43
   0  -3   0   41.88    3.70
   0  -3   0   49.22    3.74
   0  -3   0   44.88    3.71
   0   3   0   46.44    3.84
   0  -3  -1 1796.21   51.01
   0   3   1 1729.42   50.85
   0  -3  -1 1676.93   51.98
   0   3   1 1735.61   51.84
   0   3   1 1842.27   52.33
   0  -3  -1 1699.31   51.71
   0   3   1 1808.21   52.05
   0   3   1 1811.67   51.77
   0  -3  -1 1835.34   52.25
   0   3   1 1893.73   52.56
   0  -3  -2  706.99   21.74
   0   3   2  820.26   24.05
   0   3   2  679.28   22.74
   0  -3  -2  660.04   23.17
   0   3   2  685.35   22.74
   0  -3  -2  672.79   22.82
   0   3   2  690.07   22.47
   0   3   2  551.83   22.35
   0   3   2  694.42   23.43
   0  -3  -2  662.58   22.47
   0  -3  -2  691.15   23.51
   0  -3  -3 5140.89  149.26
   0  -3  -3 5749.93  146.99
   0   3   3 5755.90  148.74
   0   3   3 5202.74  148.20
   0   3   3 5345.85  148.82
   0   3   3 5324.67  149.39
   0  -3  -3 5863.17  149.58
   0  -3  -3 5325.14  148.46
   0  -3  -4 6945.55  191.31
   0   3   4 7107.56  190.66
   0  -3  -4 6910.44  192.10
   0   3   4 7214.17  191.34
   0   3   4 7048.67  192.15
   0  -3  -4 7271.97  191.01
   0  -3  -5  173.43    8.92
   0   3   5  152.06    8.32
   0   3   5  155.57    9.25
   0   3   5  159.37    8.84
   0  -3  -5  157.22    8.89
   0  -3  -5  184.65   10.01
   0  -3  -6 1061.50   33.44
   0  -3  -6  956.21   32.24
   0   3   6  921.00   32.39
   0   3   6 1078.88   32.80
   0   3   6  959.53   33.70
   0  -3  -6  969.02   33.60
   0   3   7  645.42   23.97
   0   3   7  567.45   21.57
   0  -3  -7  588.89   22.03
   0   3   7  578.88   22.21
   0  -3  -7  588.90   22.56
   0  -3  -7  613.46   23.70
   0  -3  -8    2.79    1.51
   0   3   8    1.58    0.93
   0  -3  -8    1.69    1.23
   0   3   8    1.38    1.00
   0  -3  -8    1.21    0.66
   0  -3  -8    0.92    0.66
   0   3   8    1.05    1.03
   0  -3  -9  262.70   11.80
   0   3   9  279.43   13.63
   0  -3  -9  239.67   12.34
   0   3   9  241.04   13.89
   0   3   9  219.01   11.87
   0  -3  -9  244.10   13.02
   0  -3  -9  222.75   13.27
   0   3   9  236.98   11.28
   0  -3 -10 1170.82   40.02
   0  -3 -10 1121.38   40.46
   0  -3 -10 1151.25   38.66
   0   3  10 1127.89   36.84
   0  -3 -10 1146.79   37.19
   0   3  10 1138.72   39.32
   0   3  10 1194.77   41.12
   0   3  11   79.80    7.22
   0   3  11   71.03    5.77
   0  -3 -11   85.94    6.61
   0   3  11   61.90    6.88
   0  -3 -11   75.75    6.67
   0  -3 -11   67.28    7.07
   0  -3 -11   92.89    8.00
   0  -3 -12 1285.89   41.02
   0   3  12 1258.44   44.56
   0  -3 -12 1222.27   41.88
   0   3  12 1167.27   39.27
   0  -3 -12 1189.17   43.96
   0   3  12 1203.97   42.63
   0  -3 -12 1249.78   43.69
   0  -3 -13  282.68   16.60
   0   3  13  270.68   15.66
   0  -3 -13  292.61   14.56
   0   3  13  287.46   16.07
   0  -3 -13  273.40   14.99
   0  -3 -13  267.05   15.97
   0   3  13  255.84   16.14
   0   3  13  269.51   13.33
   0   3  14  778.34   31.32
   0  -3 -14  689.13   29.32
   0  -3 -14  763.78   32.30
   0   3  14  730.66   32.07
   0   3  14  767.43   31.36
   0   3  14  767.85   27.68
   0  -3 -14  793.98   29.33
   0  -3 -14  740.68   31.62
   0  -3 -15  150.81   10.51
   0   3  15  149.32   11.61
   0   3  15  164.40   12.31
   0   3  15  140.35    9.31
   0  -3 -15  133.34   11.97
   0  -3 -15  155.90   11.36
   0  -3 -15  147.68   12.19
   0   3  16   53.23    6.76
   0  -3 -16   59.30    7.85
   0  -3 -16   57.51    6.38
   0   3  16   52.00    5.56
   0   3  16   51.01    6.75
   0   3  17   23.59    4.90
   0  -3 -17   30.50    5.79
   0   3  17   12.40    3.26
   0  -3 -17   23.93    4.18
   0   3  17   25.04    3.91
   0   3  18    1.12    2.24
   0   3  18    1.41    1.24
   0   3  18   -0.26    1.31
   0  -3 -18    4.49    2.68
   0  -3 -18    1.39    1.73
   0   3  19  727.76   33.79
   0  -3 -19  723.55   34.56
   0   3  19  734.02   33.66
   0  -3 -19  721.95   31.22
   0   3  19  713.33   28.25
   0   3  20  299.70   16.03
   0  -3 -20  338.16   21.92
   0   3  20  332.86   21.03
   0   3  20  278.43   19.46
   0  -3 -20  275.45   17.50
   0   3  21  102.97   11.69
   0   3  21  100.66   11.23
   0  -3 -21   92.39    9.60
   0  -3 -21   87.40   10.91
   0   3  21   84.82    7.88
   0  -3 -22  387.19   21.93
   0  -3 -22  366.01   24.26
   0   3  22  369.79   23.81
   0   3  23   57.98    9.16
   0   3  23   76.43   10.30
   0  -3 -23   57.89    9.15
   0  -3 -23   56.19    7.91
   0   4 -22    7.99    4.29
   0   4 -22    9.69    4.30
   0  -4  22   11.47    4.81
   0  -4  22   13.27    3.41
   0  -4  21   34.94    5.71
   0   4 -21   27.36    6.10
   0  -4  21   29.67    6.14
   0   4 -21   35.03    7.10
   0  -4  20  154.50   13.76
   0   4 -20  176.01   15.83
   0  -4  20  166.22   12.87
   0   4 -20  158.62   14.08
   0  -4  19    0.31    1.45
   0   4 -19    4.63    2.68
   0   4 -19   -0.08    1.62
   0  -4  19    3.61    2.21
   0   4 -18  144.92   12.72
   0  -4  18  115.94   10.15
   0  -4  18  144.06   11.36
   0   4 -18  129.48   12.79
   0  -4  18  145.27   12.56
   0  -4  17  106.41   10.34
   0   4 -17   88.11   10.02
   0  -4  17   82.54    8.03
   0  -4  17   98.55    9.11
   0   4 -17   87.04    9.69
   0   4 -16  112.49    9.77
   0  -4  16  108.03    9.33
   0  -4  16  104.51   10.04
   0   4 -16  117.05   10.90
   0   4 -16  120.59   11.50
   0  -4  16  107.64    9.04
   0   4 -15  980.31   39.94
   0  -4  15 1001.70   35.85
   0   4 -15  909.71   37.80
   0   4 -15  923.58   35.95
   0  -4  15  965.78   36.44
   0  -4  15 1011.60   38.52
   0   4 -14  417.54   21.35
   0   4 -14  458.40   23.30
   0   4 -14  392.44   19.55
   0  -4  14  414.43   21.00
   0  -4  14  428.26   19.39
   0   4 -14  390.67   20.34
   0  -4  14  421.60   19.94
   0   4 -13  287.39   15.88
   0   4 -13  254.90   15.56
   0   4 -13  279.59   15.05
   0   4 -13  299.81   17.63
   0  -4  13  259.02   14.63
   0  -4  13  278.21   15.88
   0  -4  13  256.62   13.84
   0  -4  12  779.77   28.05
   0   4 -12  736.44   31.46
   0  -4  12  731.38   29.82
   0   4 -12  749.48   30.33
   0   4 -12  736.28   29.55
   0   4 -12  719.16   31.06
   0   4 -12  787.56   29.28
   0  -4  12  754.91   32.07
   0  -4  12  743.63   29.02
   0   4 -11  154.57   10.52
   0   4 -11  134.53   10.81
   0  -4  11  144.34    9.23
   0  -4  11  145.32   10.32
   0   4 -11  135.82   10.94
   0   4 -11  154.50   10.06
   0   4 -11  151.51   10.84
   0  -4  11  146.64   11.46
   0  -4  11  172.38   10.68
   0   4 -10  769.96   30.30
   0   4 -10  757.39   30.10
   0  -4  10  769.82   28.27
   0   4 -10  765.37   28.68
   0   4 -10  697.82   28.50
   0  -4  10  790.32   30.91
   0  -4  10  682.64   28.06
   0   4 -10  725.59   27.70
   0  -4  10  728.41   26.53
   0  -4   9  447.12   17.85
   0   4  -9  443.80   20.33
   0   4  -9  425.49   18.53
   0  -4   9  417.87   20.39
   0  -4   9  424.76   18.64
   0   4  -9  445.45   19.18
   0  -4   9  399.32   18.73
   0   4  -9  448.03   20.45
   0   4  -9  416.46   19.17
   0   4  -8  959.28   33.88
   0  -4   8  928.04   34.79
   0  -4   8  930.76   31.35
   0  -4   8  938.99   32.97
   0  -4   8  910.57   33.08
   0   4  -8  960.11   32.89
   0   4  -8  970.76   35.03
   0   4  -8  990.96   33.49
   0   4  -7   29.70    3.89
   0   4  -7   28.90    3.73
   0  -4   7   22.29    3.34
   0  -4   7   30.15    3.98
   0  -4   7   31.27    3.53
   0  -4   7   27.76    4.38
   0   4  -7   33.28    4.61
   0  -4   7   29.54    4.22
   0   4  -7   29.14    3.96
   0  -4   6   51.48    4.95
   0  -4   6   56.74    5.27
   0   4  -6   47.57    5.07
   0   4  -6   51.58    4.98
   0  -4   6   53.14    5.27
   0  -4   6   54.55    5.58
   0   4  -6   56.83    5.30
   0   4  -6   49.73    5.48
   0  -4   5 1543.41   47.37
   0  -4   5 1562.89   48.10
   0  -4   5 1328.70   45.29
   0  -4   5 1509.24   46.68
   0   4  -5 1451.68   45.60
   0   4  -5 1412.88   46.07
   0   4  -5 1464.58   45.85
   0   4  -4 1100.23   36.43
   0  -4   4 1062.76   35.82
   0   4  -4 1078.71   36.36
   0   4  -4 1102.55   35.83
   0  -4   4 1143.88   36.66
   0  -4   4 1092.03   36.62
   0  -4   4 1181.41   36.63
   0   4  -4 1112.34   36.03
   0  -4   4 1069.17   37.08
   0   4  -3  396.04   16.40
   0  -4   3  366.10   16.56
   0  -4   3  372.95   15.96
   0   4  -3  365.81   16.07
   0   4  -3  415.10   16.25
   0   4  -3  385.10   16.01
   0  -4   3  426.21   16.59
   0  -4   3  381.60   16.33
   0  -4   2  140.55    8.20
   0   4  -2  123.35    7.70
   0  -4   2  137.01    8.21
   0   4  -2  127.81    7.72
   0  -4   2  154.35    8.93
   0   4  -2  121.96    7.85
   0  -4   2  120.88    7.69
   0   4  -2  134.59    8.09
   0  -4   2  126.73    7.82
   0   4  -2  132.84    7.90
   0   4  -1   63.28    5.29
   0   4  -1   73.20    5.58
   0   4  -1   69.78    5.33
   0   4  -1   81.26    6.00
   0   4  -1   69.70    5.53
   0  -4   1   79.56    5.90
   0  -4   1   68.46    5.53
   0  -4   1   65.92    5.57
   0  -4   1   69.71    5.38
   0  -4   1   69.42    5.37
   0  -4   1   74.07    5.79
   0   4   0   27.10    3.41
   0  -4   0   25.21    3.24
   0   4   0   27.79    3.24
   0  -4   0   23.59    3.18
   0   4   0   27.03    3.33
   0  -4   0   34.33    3.77
   0   4   0   31.17    3.31
   0  -4   0   28.96    3.22
   0   4   0   24.40    3.11
   0  -4   0   24.80    3.24
   0  -4   0   28.40    3.47
   0  -4  -1   48.04    4.54
   0   4   1   30.61    3.63
   0   4   1   40.31    4.23
   0   4   1   43.00    4.21
   0  -4  -1   36.47    4.04
   0   4   1   34.22    3.42
   0  -4  -1   42.08    4.16
   0   4   1   36.13    3.70
   0  -4  -1   40.67    3.70
   0  -4  -2 1606.53   51.04
   0  -4  -2 1608.09   51.91
   0  -4  -2 1917.66   52.93
   0   4   2 1649.60   51.39
   0   4   2 1689.70   51.16
   0   4   2 1606.51   51.95
   0   4   2 1842.23   52.57
   0   4   2 1673.78   51.48
   0  -4  -2 1623.13   49.90
   0   4   2 1929.35   53.13
   0  -4  -3   98.34    7.00
   0   4   3  103.90    7.03
   0  -4  -3  100.27    7.31
   0  -4  -3  103.30    6.09
   0  -4  -3   96.43    7.34
   0  -4  -3  111.64    7.13
   0   4   3   91.98    6.89
   0   4   3   98.25    7.18
   0   4   3  106.19    6.76
   0   4   3  101.49    7.32
   0   4   3  119.57    7.44
   0  -4  -4   84.36    5.47
   0   4   4   92.42    7.06
   0  -4  -4   90.52    6.75
   0   4   4   84.44    6.29
   0  -4  -4   76.87    6.72
   0  -4  -4   90.71    6.88
   0   4   4   93.45    6.59
   0   4   4   89.19    6.73
   0   4   5  511.70   20.53
   0  -4  -5  535.77   20.35
   0  -4  -5  514.40   19.64
   0   4   5  471.83   19.34
   0   4   5  483.05   19.00
   0  -4  -6  224.04   12.11
   0   4   6  216.84   12.53
   0   4   6  231.27   11.70
   0  -4  -6  225.70   12.70
   0   4   6  212.73   11.79
   0   4   6  224.38   11.74
   0  -4  -6  244.24   12.18
   0   4   7   12.98    2.64
   0  -4  -7    5.66    1.99
   0   4   7    5.20    1.61
   0   4   7   11.29    2.50
   0  -4  -7   13.37    2.70
   0   4   7   10.09    2.30
   0  -4  -7   15.63    2.88
   0  -4  -8  162.41   10.23
   0  -4  -8  166.94   10.68
   0   4   8  162.68   11.18
   0  -4  -8  164.81   11.19
   0   4   8  168.46   10.10
   0   4   8  181.28   10.83
   0  -4  -9  134.51    9.42
   0   4   9  142.94    9.48
   0   4   9  129.99    9.44
   0   4   9  147.24   10.81
   0  -4  -9  143.87    9.97
   0  -4  -9  146.29    8.51
   0  -4  -9  145.67   10.66
   0   4  10   81.40    7.53
   0   4  10   78.59    7.03
   0  -4 -10   98.37    6.94
   0   4  10   76.58    7.84
   0  -4 -10   69.10    7.56
   0  -4 -10   79.66    7.26
   0  -4 -10   87.98    7.94
   0   4  11  167.45   12.34
   0  -4 -11  151.71   10.54
   0   4  11  158.33    9.58
   0   4  11  194.18   11.67
   0   4  11  156.15   11.11
   0  -4 -11  168.15   12.30
   0  -4 -11  158.49   11.38
   0  -4 -11  143.52    9.29
   0  -4 -12  648.59   24.93
   0  -4 -12  683.01   29.35
   0  -4 -12  684.86   27.42
   0  -4 -12  631.07   27.74
   0   4  12  652.28   27.58
   0   4  12  614.10   28.65
   0   4  12  666.99   25.04
   0   4  13   12.04    2.58
   0  -4 -13    8.44    2.60
   0  -4 -13    9.72    2.81
   0   4  13    9.25    2.80
   0  -4 -13    6.18    1.96
   0   4  13   18.01    3.96
   0  -4 -13   12.47    2.46
   0  -4 -14    4.47    2.23
   0  -4 -14    6.80    2.63
   0  -4 -14    5.46    1.81
   0   4  14    3.68    2.43
   0   4  14    5.97    1.91
   0   4  15    8.45    2.23
   0  -4 -15    6.39    2.00
   0   4  15   13.83    3.29
   0   4  15   10.41    3.06
   0  -4 -15    7.10    2.74
   0   4  16  249.09   16.56
   0   4  16  240.54   16.13
   0   4  16  235.69   13.29
   0  -4 -16  241.08   17.16
   0  -4 -16  234.94   14.15
   0  -4 -17   23.33    4.39
   0   4  17   28.13    5.24
   0   4  17   19.97    4.58
   0   4  17   25.27    3.99
   0  -4 -17   35.94    6.59
   0   4  18  180.47   14.45
   0   4  18  183.96   14.75
   0  -4 -18  219.28   16.77
   0   4  18  181.50   11.78
   0  -4 -18  187.44   12.97
   0   4  19   70.49    9.04
   0  -4 -19   56.73    8.75
   0   4  19   81.91    7.70
   0  -4 -19   55.67    7.04
   0   4  19   65.64    8.80
   0  -4 -20   92.17   11.19
   0   4  20   91.52    8.33
   0  -4 -20   81.18    8.80
   0   4  20  103.55   11.44
   0   4  20   92.52   10.70
   0  -4 -21   26.88    5.20
   0   4  21   28.10    5.94
   0  -4 -21   28.15    6.39
   0   4  21   31.13    4.93
   0   4  21   19.17    5.12
   0  -4 -22   74.36    8.70
   0   4  22   86.90   11.13
   0   4  22   76.54   10.29
   0  -4 -23  246.41   16.97
   0   4  23  234.79   19.16
   0   4  23  230.02   18.99
   0  -4 -23  233.36   19.62
   0   5 -22  207.00   18.58
   0  -5  22  188.36   16.40
   0   5 -22  158.36   15.44
   0  -5  22  189.94   14.89
   0  -5  21    9.35    3.81
   0   5 -21   13.98    5.22
   0  -5  21    4.08    2.53
   0   5 -21    7.98    3.98
   0   5 -20    2.87    2.32
   0  -5  20    0.45    1.47
   0  -5  20    0.98    2.08
   0   5 -20   -0.31    1.81
   0  -5  19  120.29   11.99
   0   5 -19  107.37   11.37
   0   5 -19   94.07   11.56
   0  -5  19  118.27   10.87
   0  -5  18  505.96   26.95
   0   5 -18  582.26   30.40
   0  -5  18  536.37   26.04
   0   5 -18  522.42   27.81
   0  -5  17  284.13   16.58
   0   5 -17  349.31   22.04
   0   5 -17  314.22   19.98
   0  -5  17  326.50   18.79
   0  -5  17  343.92   20.42
   0  -5  16    3.05    2.38
   0  -5  16    8.14    3.03
   0   5 -16   10.01    3.22
   0   5 -16    4.37    1.89
   0  -5  16    8.87    2.55
   0   5 -15  142.19   11.93
   0  -5  15  138.30   11.09
   0   5 -15  119.03   11.77
   0  -5  15  115.76    9.48
   0  -5  15  138.68   11.70
   0  -5  14   59.29    7.16
   0  -5  14   55.48    6.10
   0   5 -14   55.99    7.25
   0   5 -14   50.18    7.25
   0  -5  14   46.74    6.32
   0  -5  13  179.39   12.67
   0  -5  13  190.79   12.67
   0  -5  13  173.29   11.01
   0   5 -13  167.22   13.50
   0   5 -13  166.76   11.82
   0   5 -13  170.10   12.82
   0   5 -13  163.38   12.13
   0  -5  12  457.09   19.95
   0   5 -12  465.83   22.73
   0  -5  12  453.64   21.58
   0   5 -12  462.38   21.98
   0  -5  12  463.41   22.28
   0   5 -12  434.19   21.05
   0   5 -12  494.51   24.20
   0  -5  11   40.40    5.20
   0  -5  11   42.90    4.99
   0  -5  11   54.41    6.30
   0   5 -11   44.16    6.39
   0   5 -11   44.85    5.91
   0   5 -11   45.62    5.56
   0   5 -10   26.68    4.55
   0   5 -10   21.24    3.69
   0  -5  10   30.01    4.64
   0  -5  10   33.11    5.50
   0  -5  10   34.65    4.84
   0   5 -10   38.51    5.50
   0   5 -10   32.96    5.22
   0  -5  10   28.53    3.96
   0   5 -10   30.01    4.44
   0   5  -9   21.62    3.68
   0   5  -9   23.22    3.70
   0  -5   9   17.26    2.89
   0   5  -9   29.28    4.73
   0  -5   9   20.58    3.67
   0  -5   9   15.39    3.29
   0  -5   9   20.14    3.96
   0   5  -8 1295.65   43.80
   0  -5   8 1320.58   43.43
   0   5  -8 1182.56   42.34
   0  -5   8 1270.91   43.89
   0  -5   8 1202.72   42.67
   0   5  -8 1253.30   42.55
   0  -5   8 1245.68   40.69
   0  -5   8 1329.49   46.04
   0  -5   8 1257.70   44.77
   0   5  -7  380.88   17.58
   0  -5   7  360.36   17.47
   0   5  -7  394.57   17.61
   0   5  -7  423.61   19.27
   0  -5   7  390.55   19.48
   0   5  -7  373.12   17.97
   0  -5   7  378.76   18.05
   0   5  -6  694.84   27.68
   0  -5   6  723.15   27.59
   0   5  -6  747.32   28.59
   0   5  -6  723.15   27.54
   0  -5   6  704.68   29.02
   0  -5   6  748.07   28.24
   0  -5   6  701.17   27.46
   0  -5   6  733.13   28.63
   0   5  -6  755.15   27.61
   0   5  -5  548.87   23.16
   0  -5   5  580.02   23.52
   0  -5   5  609.63   24.80
   0   5  -5  533.04   22.82
   0   5  -5  625.66   23.55
   0  -5   5  533.38   22.68
   0  -5   5  649.65   24.76
   0  -5   5  550.69   22.96
   0   5  -4 2402.20   69.30
   0  -5   4 2362.21   70.28
   0   5  -4 2107.27   67.73
   0  -5   4 2256.76   68.91
   0   5  -4 2368.66   69.22
   0  -5   4 2335.83   68.76
   0  -5   4 2172.24   68.64
   0   5  -4 2215.87   67.85
   0  -5   4 2137.99   68.03
   0   5  -3   87.31    7.05
   0  -5   3   92.13    7.28
   0   5  -3   89.82    7.09
   0  -5   3   88.62    7.21
   0  -5   3   86.39    6.93
   0  -5   3  108.11    7.91
   0   5  -3   90.06    7.14
   0  -5   3   92.40    7.60
   0   5  -3   88.63    6.92
   0   5  -2 4439.43  126.87
   0   5  -2 4636.22  127.97
   0  -5   2 4608.80  127.35
   0   5  -2 4618.89  127.20
   0  -5   2 4349.68  126.44
   0  -5   2 4476.15  128.24
   0  -5   2 4491.30  127.77
   0  -5   2 4285.74  127.09
   0   5  -2 4382.16  127.39
   0  -5   2 4190.35  126.68
   0   5  -1  144.65    9.17
   0  -5   1  172.29   10.10
   0   5  -1  160.96    9.68
   0  -5   1  133.59    9.08
   0  -5   1  172.78   10.15
   0   5  -1  159.90    9.82
   0   5  -1  144.97    9.39
   0  -5   1  146.58    9.71
   0  -5   1  146.17    9.10
   0  -5   1  151.17    9.43
   0   5  -1  190.89   10.10
   0   5   0 3836.00  110.70
   0  -5   0 3761.27  110.90
   0  -5   0 3670.01  110.50
   0   5   0 4263.31  113.13
   0  -5   0 3837.97  110.88
   0  -5   0 3836.40  110.66
   0   5   0 3857.23  109.48
   0   5   0 3856.21  110.67
   0   5   0 3839.91  110.27
   0  -5   0 4011.60  109.98
   0   5   0 3885.24  110.89
   0  -5  -1  351.88   14.80
   0  -5  -1  335.29   15.67
   0  -5  -1  322.33   15.41
   0   5   1  312.68   15.04
   0   5   1  319.65   15.32
   0   5   1  358.70   15.39
   0   5   1  309.79   14.07
   0  -5  -1  324.17   15.17
   0   5   1  335.69   15.46
   0   5   2 1362.64   43.75
   0   5   2 1336.63   42.17
   0   5   2 1243.49   42.00
   0  -5  -2 1247.32   41.82
   0  -5  -2 1332.47   43.24
   0   5   2 1286.48   42.38
   0   5   2 1279.70   42.59
   0  -5  -2 1302.91   40.97
   0  -5  -2 1283.93   42.65
   0  -5  -3   41.32    4.92
   0   5   3   56.48    5.42
   0   5   3   49.60    4.98
   0   5   3   47.44    5.11
   0   5   3   52.60    5.73
   0  -5  -3   38.21    4.80
   0  -5  -3   39.84    4.07
   0   5   3   43.59    5.12
   0   5   3   43.11    4.89
   0  -5  -4  237.28   13.46
   0  -5  -4  255.43   13.28
   0   5   4  262.16   12.73
   0  -5  -4  231.01   11.11
   0   5   4  259.17   13.89
   0   5   4  226.65   12.41
   0   5   4  223.35   12.77
   0   5   4  223.77   12.84
   0  -5  -4  264.25   13.76
   0   5   4  215.69   12.10
   0   5   5    3.84    1.72
   0  -5  -5   12.38    2.20
   0   5   5    8.47    2.49
   0   5   5    5.32    1.81
   0  -5  -5    8.97    2.37
   0   5   5   10.46    2.49
   0   5   5    6.23    1.89
   0  -5  -5    7.93    2.26
   0  -5  -5    9.34    2.40
   0   5   6 2747.45   81.89
   0   5   6 2764.95   82.27
   0  -5  -6 2849.42   82.85
   0  -5  -6 2697.47   79.17
   0  -5  -6 2669.30   83.90
   0  -5  -6 2819.19   83.48
   0   5   6 2799.63   84.27
   0   5   6 2728.50   82.77
   0  -5  -7   39.24    5.07
   0   5   7   35.75    5.16
   0  -5  -7   30.67    4.69
   0  -5  -7   29.25    4.22
   0   5   7   30.92    4.29
   0   5   7   37.29    4.78
   0   5   7   33.45    4.34
   0  -5  -8 1370.70   45.50
   0  -5  -8 1288.93   45.52
   0   5   8 1339.42   47.18
   0   5   8 1290.80   44.30
   0  -5  -8 1280.05   46.68
   0   5   8 1392.62   45.94
   0  -5  -9  132.72    9.99
   0  -5  -9  124.33   10.59
   0   5   9  143.95   10.38
   0   5   9  137.53   11.00
   0   5   9  148.05   10.45
   0   5   9  134.78    9.76
   0  -5  -9  152.30   10.91
   0   5  10 1042.31   40.27
   0  -5 -10 1087.78   38.81
   0  -5 -10 1053.50   35.44
   0  -5 -10 1015.22   38.82
   0   5  10 1029.39   38.26
   0   5  10 1046.10   37.66
   0  -5 -10 1071.21   40.59
   0   5  10 1014.91   38.26
   0   5  11  869.17   36.24
   0  -5 -11  831.42   33.63
   0  -5 -11  821.13   34.30
   0   5  11  863.81   34.15
   0   5  11  921.24   34.05
   0  -5 -11  949.41   36.99
   0  -5 -11  888.99   31.35
   0  -5 -12  944.60   38.05
   0   5  12  962.48   36.76
   0  -5 -12  985.19   34.39
   0   5  12  983.12   37.75
   0  -5 -12 1019.83   38.02
   0  -5 -12  988.86   39.99
   0  -5 -13   57.57    7.72
   0   5  13   44.21    6.36
   0  -5 -13   45.90    6.52
   0   5  13   55.56    5.91
   0  -5 -13   47.17    5.30
   0  -5 -14    9.48    3.39
   0   5  14    3.37    1.74
   0   5  14    9.96    2.73
   0  -5 -15    3.77    2.40
   0   5  15    5.14    2.02
   0   5  15    0.54    1.58
   0  -5 -15    5.48    2.08
   0  -5 -16  171.20   11.78
   0   5  16  181.61   13.98
   0  -5 -16  172.33   15.01
   0   5  16  187.81   12.15
   0   5  17    0.94    1.43
   0  -5 -17    2.58    2.84
   0   5  17   -0.59    1.22
   0  -5 -17   -0.28    0.91
   0   5  17    0.72    2.06
   0   5  18  191.14   15.71
   0   5  18  179.93   12.35
   0   5  18  209.38   15.83
   0  -5 -18  201.39   13.50
   0  -5 -18  203.98   16.97
   0   5  19   -0.67    1.77
   0  -5 -19    4.85    2.50
   0  -5 -19    0.23    1.65
   0   5  19    2.27    1.81
   0   5  19   -1.08    1.96
   0  -5 -20   49.90    8.86
   0   5  20   61.27    9.14
   0  -5 -20   50.58    6.71
   0   5  20   55.47    8.51
   0   5  20   50.10    6.26
   0   5  21    6.31    3.14
   0  -5 -21    5.50    2.85
   0   5  21    9.58    3.67
   0   5  21    7.84    3.35
   0   5  22    3.31    3.46
   0  -5 -22   -1.86    3.25
   0   5  22    3.60    3.23
   0  -6  21  130.42   13.56
   0  -6  21  114.01   11.89
   0   6 -21  138.39   14.85
   0   6 -21  116.38   13.12
   0  -6  20    7.47    3.54
   0  -6  20    9.45    4.37
   0   6 -20    6.46    3.83
   0   6 -20   -0.16    1.97
   0   6 -19  120.59   13.52
   0   6 -19  117.27   12.58
   0  -6  19  117.35   12.23
   0  -6  19  117.83   11.66
   0  -6  18   18.58    4.71
   0  -6  18   11.06    4.04
   0   6 -18   19.01    5.14
   0  -6  17  186.61   14.35
   0  -6  17  190.97   15.16
   0   6 -17  175.05   14.86
   0   6 -16  489.85   26.31
   0  -6  16  525.53   26.46
   0  -6  16  474.66   24.88
   0   6 -15   88.79    9.79
   0  -6  15   83.62    9.35
   0  -6  15   67.59    7.10
   0  -6  15   76.69    8.78
   0  -6  14  247.35   16.07
   0  -6  14  251.19   16.51
   0  -6  14  243.32   14.21
   0  -6  13   15.85    3.92
   0  -6  13   23.04    5.17
   0  -6  13   15.40    3.96
   0   6 -13   23.11    4.68
   0  -6  13   14.43    3.17
   0  -6  12  467.22   20.64
   0  -6  12  458.95   22.98
   0   6 -12  435.49   24.01
   0  -6  12  464.15   25.65
   0   6 -12  466.70   23.67
   0  -6  12  446.19   22.51
   0  -6  11  299.64   19.57
   0   6 -11  307.77   18.62
   0   6 -11  305.27   17.89
   0  -6  11  308.12   17.45
   0  -6  11  336.35   18.05
   0  -6  11  308.44   15.62
   0   6 -11  285.34   16.90
   0  -6  10   75.48    7.75
   0   6 -10   71.50    8.13
   0  -6  10   70.44    8.57
   0   6 -10   66.34    7.28
   0   6 -10   62.22    7.05
   0  -6  10   75.45    6.72
   0   6 -10   67.69    7.69
   0  -6   9  272.28   16.31
   0  -6   9  268.03   17.28
   0   6  -9  297.86   17.18
   0   6  -9  269.56   16.07
   0  -6   9  274.37   14.08
   0   6  -9  257.41   15.17
   0  -6   9  273.74   15.73
   0  -6   9  248.05   15.12
   0   6  -9  253.86   15.01
   0   6  -8   77.90    7.92
   0  -6   8   98.43    9.31
   0  -6   8   82.98    7.96
   0  -6   8   80.73    7.88
   0   6  -8   81.38    8.13
   0  -6   8   69.68    7.48
   0   6  -8   75.07    7.36
   0   6  -8   83.21    7.85
   0  -6   8   80.38    8.73
   0  -6   7  221.29   13.85
   0  -6   7  220.02   14.61
   0  -6   7  215.88   13.32
   0  -6   7  225.75   14.21
   0   6  -7  217.76   13.60
   0   6  -7  232.62   13.44
   0   6  -7  222.22   14.03
   0  -6   7  187.82   12.66
   0   6  -7  210.90   13.14
   0  -6   6 1023.06   35.58
   0  -6   6  985.60   35.50
   0   6  -6  875.58   34.18
   0   6  -6  906.27   33.90
   0  -6   6  964.85   34.81
   0   6  -6  867.77   34.44
   0   6  -6  895.34   33.87
   0  -6   6  862.02   34.75
   0  -6   6  893.99   35.92
   0  -6   5  555.48   24.49
   0   6  -5  529.19   23.82
   0  -6   5  571.66   25.45
   0   6  -5  526.39   23.33
   0   6  -5  614.41   25.06
   0  -6   5  583.06   24.43
   0  -6   5  557.72   24.01
   0   6  -5  609.40   24.44
   0  -6   5  565.76   24.48
   0  -6   4  717.86   27.88
   0  -6   4  712.38   28.05
   0   6  -4  712.60   27.91
   0  -6   4  653.32   27.03
   0  -6   4  641.29   28.04
   0   6  -4  717.38   27.44
   0   6  -4  656.82   27.13
   0   6  -4  712.86   27.72
   0  -6   4  674.93   27.89
   0  -6   3  139.94    9.54
   0   6  -3  139.40   10.04
   0  -6   3  152.25   10.91
   0   6  -3  152.95   10.14
   0   6  -3  149.17   10.03
   0  -6   3  136.24    9.84
   0  -6   3  139.39   10.10
   0   6  -3  139.69    9.78
   0  -6   3  144.05   10.03
   0  -6   2 1642.10   54.16
   0  -6   2 1669.14   53.80
   0   6  -2 1685.81   54.18
   0   6  -2 1727.15   54.09
   0  -6   2 1607.86   53.40
   0  -6   2 1730.52   54.60
   0   6  -2 1751.65   54.75
   0  -6   2 1636.00   54.90
   0  -6   2 1676.27   54.76
   0   6  -2 1695.51   53.68
   0   6  -2 1597.68   53.92
   0   6  -1 1192.63   39.69
   0   6  -1 1100.98   38.99
   0  -6   1 1226.89   40.48
   0  -6   1 1070.87   38.89
   0   6  -1 1137.75   38.25
   0  -6   1 1161.94   38.74
   0   6  -1 1057.41   38.22
   0  -6   1 1113.76   39.56
   0   6  -1 1117.15   39.17
   0  -6   1 1042.04   38.29
   0   6   0   28.73    4.00
   0   6   0   28.42    4.46
   0   6   0   30.35    4.23
   0   6   0   29.20    4.46
   0   6   0   27.83    4.26
   0   6   0   33.85    4.75
   0  -6   0   39.81    5.05
   0  -6   0   35.93    4.74
   0  -6   0   30.68    4.10
   0  -6   0   37.03    4.80
   0   6   1 1383.87   46.19
   0   6   1 1311.68   45.89
   0  -6  -1 1305.32   46.25
   0   6   1 1485.25   48.36
   0   6   1 1339.64   46.37
   0   6   1 1432.07   45.04
   0   6   1 1500.48   46.59
   0  -6  -1 1437.11   46.70
   0  -6  -1 1370.97   46.72
   0  -6  -1 1335.43   44.65
   0   6   2  322.85   16.34
   0   6   2  317.24   16.10
   0   6   2  355.16   16.48
   0   6   2  322.35   16.82
   0   6   2  272.56   15.13
   0  -6  -2  326.46   16.72
   0  -6  -2  340.40   16.79
   0  -6  -2  301.28   14.63
   0  -6  -2  320.40   15.98
   0   6   3  179.46   11.60
   0  -6  -3  174.67   10.10
   0   6   3  175.72   11.85
   0   6   3  182.14   11.46
   0   6   3  176.81   10.98
   0  -6  -3  171.08   11.40
   0  -6  -3  171.34   10.92
   0   6   3  195.56   11.85
   0  -6  -3  174.98   11.79
   0  -6  -4   96.51    7.91
   0   6   4   89.97    7.75
   0  -6  -4   90.48    8.37
   0   6   4   82.95    7.29
   0   6   4   89.51    8.27
   0   6   4   87.33    7.61
   0  -6  -4   98.48    7.03
   0  -6  -4   90.57    8.02
   0   6   4   91.78    8.16
   0   6   4   80.16    7.84
   0  -6  -5   68.88    7.04
   0   6   5   81.43    7.43
   0  -6  -5   76.34    7.75
   0   6   5   55.60    6.45
   0   6   5   90.25    8.23
   0   6   5   79.31    7.76
   0   6   5   76.88    7.17
   0   6   5   80.40    7.03
   0  -6  -5   78.39    6.26
   0   6   6 1008.55   38.17
   0   6   6 1065.89   37.79
   0  -6  -6 1100.86   36.18
   0   6   6 1120.80   40.15
   0  -6  -6 1081.33   40.58
   0  -6  -6 1069.09   39.31
   0   6   6 1180.31   40.55
   0   6   6 1126.93   39.21
   0  -6  -6 1074.84   39.95
   0   6   6 1063.75   40.51
   0  -6  -7   52.03    5.07
   0  -6  -7   49.04    5.92
   0   6   7   51.61    6.25
   0   6   7   41.50    6.08
   0   6   7   33.85    4.96
   0   6   7   43.15    5.18
   0  -6  -7   42.95    6.05
   0   6   7   47.21    5.71
   0   6   8 1040.98   39.45
   0   6   8 1063.87   38.29
   0   6   8 1197.59   43.17
   0   6   8 1076.01   40.28
   0  -6  -8 1100.36   36.50
   0  -6  -8 1084.23   40.10
   0   6   8 1063.02   39.29
   0  -6  -8 1214.70   43.22
   0   6   9  551.94   26.73
   0   6   9  546.46   24.78
   0   6   9  547.53   25.18
   0   6   9  572.01   24.70
   0  -6  -9  549.46   26.56
   0  -6  -9  548.71   25.58
   0  -6  -9  600.61   25.95
   0   6  10  224.66   14.02
   0  -6 -10  213.83   15.18
   0   6  10  224.23   14.49
   0  -6 -10  223.97   14.99
   0   6  10  233.96   14.60
   0  -6 -11 1706.65   59.62
   0   6  11 1643.33   55.87
   0  -6 -11 1648.53   52.68
   0   6  11 1792.33   58.00
   0  -6 -12  206.56   15.62
   0   6  12  190.63   13.73
   0   6  12  221.70   14.90
   0   6  12  200.64   13.78
   0  -6 -12  208.26   12.06
   0  -6 -13  287.50   19.15
   0  -6 -13  261.43   14.56
   0   6  13  309.95   17.67
   0   6  13  291.72   17.86
   0  -6 -14  758.71   29.44
   0  -6 -14  800.04   36.22
   0   6  14  736.63   33.01
   0   6  14  736.96   30.17
   0   6  15   -0.29    1.66
   0  -6 -15    1.31    1.64
   0   6  15    0.72    0.89
   0   6  16  234.15   14.56
   0  -6 -16  240.39   14.41
   0  -6 -16  266.26   19.30
   0   6  16  222.23   16.47
   0   6  17   71.28    9.31
   0   6  17   92.56    8.68
   0  -6 -17   82.93   10.71
   0  -6 -17   79.94    8.13
   0  -6 -18  146.26   11.41
   0   6  18  143.05   11.26
   0   6  18  148.16   13.89
   0  -6 -18  150.08   15.04
   0   6  19  443.23   25.70
   0  -6 -19  407.51   21.17
   0   6  19  449.13   26.57
   0  -6 -19  397.54   26.54
   0   6  19  399.65   20.75
   0   6  20  112.29   12.22
   0  -6 -20  117.17   14.15
   0   6  20  122.43   10.41
   0  -6 -20  131.14   11.03
   0   6  20  132.33   13.87
   0   6  21  429.29   26.55
   0   6  21  445.75   27.65
   0  -6 -21  435.36   28.74
   0  -7  19    2.75    2.09
   0   7 -19    0.85    2.16
   0  -7  19    3.82    3.78
   0   7 -19    2.68    2.95
   0  -7  19    2.30    2.25
   0  -7  18  171.22   14.70
   0   7 -18  151.71   15.53
   0  -7  18  157.88   14.58
   0  -7  18  178.04   18.06
   0   7 -18  150.55   14.44
   0   7 -17   98.53   12.21
   0  -7  17   98.63   11.20
   0   7 -17  104.58   11.62
   0  -7  17  105.29   11.18
   0  -7  17  122.11   14.10
   0   7 -16  214.64   17.91
   0  -7  16  231.21   16.97
   0   7 -16  202.73   16.56
   0  -7  16  254.34   17.78
   0  -7  16  201.50   18.65
   0   7 -15   55.84    8.59
   0  -7  15   63.51    8.32
   0  -7  15   49.09    8.74
   0   7 -15   60.09    8.51
   0  -7  14  293.95   18.62
   0   7 -14  260.65   19.14
   0  -7  14  261.39   15.54
   0   7 -14  279.17   18.90
   0   7 -13  696.29   32.09
   0  -7  13  716.46   31.96
   0  -7  13  684.66   34.86
   0  -7  13  663.80   31.08
   0  -7  13  667.30   28.04
   0   7 -13  650.59   32.44
   0   7 -12  370.07   22.37
   0   7 -12  394.51   22.05
   0  -7  12  375.70   23.74
   0  -7  12  353.04   18.28
   0  -7  12  391.26   21.62
   0  -7  12  404.43   21.85
   0   7 -11  716.74   31.96
   0  -7  11  698.93   28.39
   0  -7  11  702.20   31.55
   0  -7  11  743.30   32.06
   0   7 -11  751.12   33.61
   0  -7  11  686.33   34.14
   0   7 -10   -0.01    1.64
   0  -7  10    1.22    1.95
   0   7 -10    0.59    1.59
   0  -7  10   -0.48    1.01
   0  -7  10    2.23    1.33
   0  -7  10   -3.27    2.50
   0  -7   9    4.76    2.28
   0  -7   9    6.62    2.39
   0   7  -9    4.31    2.53
   0  -7   9    5.20    1.64
   0   7  -9    3.25    2.14
   0  -7   9    4.60    2.79
   0  -7   8  397.97   22.71
   0   7  -8  421.43   21.22
   0   7  -8  436.50   22.34
   0  -7   8  412.79   21.39
   0   7  -8  381.90   20.84
   0  -7   8  399.94   21.04
   0   7  -7  101.42    9.43
   0  -7   7   92.40    9.63
   0  -7   7   97.53    9.40
   0  -7   7   99.43    9.39
   0   7  -7   82.10    8.65
   0  -7   7   97.52    9.12
   0   7  -7   97.92    9.09
   0   7  -6  941.63   37.10
   0   7  -6  978.52   37.96
   0  -7   6  959.11   37.56
   0  -7   6  930.51   37.62
   0  -7   6 1040.30   38.44
   0   7  -6 1068.55   38.94
   0  -7   5  243.17   15.92
   0   7  -5  252.58   14.87
   0  -7   5  232.85   13.73
   0  -7   5  246.43   14.99
   0   7  -5  227.09   14.62
   0  -7   5  225.07   14.73
   0   7  -5  238.55   14.63
   0  -7   5  256.38   15.11
   0   7  -5  250.93   15.05
   0  -7   5  214.45   14.41
   0  -7   4  593.63   26.57
   0   7  -4  590.65   25.68
   0  -7   4  633.17   26.84
   0  -7   4  599.11   25.18
   0  -7   4  592.59   26.06
   0  -7   4  590.01   27.19
   0   7  -4  589.80   26.22
   0  -7   4  585.09   26.15
   0   7  -4  601.83   25.94
   0   7  -4  595.02   26.01
   0   7  -3  935.88   36.05
   0  -7   3  862.30   35.26
   0   7  -3  925.77   35.65
   0  -7   3  920.83   36.68
   0  -7   3  950.29   36.53
   0  -7   3  933.51   35.97
   0  -7   3 1023.16   35.97
   0   7  -3  909.05   35.19
   0  -7   3 1054.66   36.98
   0   7  -3  905.10   35.13
   0  -7   2   -0.08    0.79
   0   7  -2   -0.01    1.04
   0  -7   2   -0.05    0.76
   0   7  -2    0.21    1.06
   0   7  -2    0.04    0.97
   0  -7   2   -1.37    1.53
   0   7  -2    3.17    1.84
   0  -7   2    0.07    1.11
   0  -7   2    0.87    0.81
   0   7  -1  367.92   19.62
   0   7  -1  400.61   18.91
   0   7  -1  367.66   17.94
   0  -7   1  355.14   18.34
   0   7  -1  353.29   17.03
   0  -7   1  366.21   18.04
   0   7  -1  343.61   17.73
   0  -7   1  398.63   18.30
   0  -7   1  337.13   18.07
   0   7   0  179.17   12.25
   0  -7   0  185.33   12.50
   0   7   0  190.37   12.40
   0   7   0  205.98   13.06
   0  -7   0  183.86   12.44
   0   7   0  178.58   13.17
   0   7   0  166.41   11.07
   0  -7   0  179.15   11.55
   0   7   0  204.02   12.51
   0  -7   0  178.35   12.47
   0  -7  -1  183.09   12.36
   0   7   1  173.90   11.81
   0  -7  -1  161.81   11.64
   0   7   1  145.86   10.99
   0   7   1  145.46   10.62
   0  -7  -1  141.89   10.71
   0   7   1  152.03   11.03
   0   7   1  150.18   10.09
   0   7   2  477.28   22.00
   0  -7  -2  480.15   22.03
   0  -7  -2  444.39   22.09
   0  -7  -2  473.40   20.59
   0   7   2  508.11   23.65
   0   7   2  476.77   22.48
   0  -7  -2  433.56   22.04
   0   7   2  485.72   21.88
   0   7   3   10.73    2.94
   0   7   3    9.49    2.62
   0  -7  -3   10.32    2.67
   0  -7  -3   12.67    3.26
   0  -7  -3   11.76    3.00
   0   7   3   11.09    3.17
   0  -7  -3    9.43    2.26
   0   7   3   13.18    3.68
   0   7   3    8.21    2.60
   0  -7  -4  486.57   21.96
   0  -7  -4  464.97   22.62
   0   7   4  495.78   23.52
   0  -7  -4  462.89   20.09
   0   7   4  439.99   21.68
   0   7   4  469.20   22.61
   0  -7  -4  486.32   23.52
   0   7   4  494.49   22.51
   0   7   4  462.08   21.49
   0   7   5    6.23    2.34
   0   7   5    3.68    1.49
   0   7   5    6.29    2.05
   0  -7  -5    6.95    2.66
   0   7   5    6.07    2.46
   0  -7  -5    5.06    2.07
   0  -7  -5    3.83    1.63
   0   7   5    5.35    1.91
   0   7   6  284.14   17.41
   0  -7  -6  318.47   15.04
   0   7   6  277.77   16.27
   0  -7  -6  325.00   18.56
   0   7   6  286.30   17.33
   0  -7  -6  256.99   16.34
   0   7   6  286.80   16.40
   0   7   6  303.64   16.28
   0   7   6  293.06   17.16
   0   7   7  856.20   35.05
   0   7   7  956.06   35.22
   0  -7  -7  806.01   35.71
   0   7   7  861.94   34.37
   0  -7  -7  905.54   31.74
   0   7   7  824.41   33.04
   0   7   8  156.02   11.74
   0  -7  -8  157.85   13.01
   0  -7  -8  149.88   12.24
   0  -7  -8  139.67    9.49
   0   7   8  163.92   12.02
   0   7   8  172.84   12.86
   0   7   8  142.30   10.79
   0   7   9  640.77   26.54
   0   7   9  645.97   28.02
   0   7   9  642.01   28.48
   0   7   9  657.65   27.82
   0  -7  -9  645.88   24.39
   0  -7 -10    2.94    1.40
   0   7  10    6.41    2.25
   0   7  10    3.86    1.99
   0   7  10    3.45    2.02
   0  -7 -10    2.88    2.08
   0   7  10    8.49    2.79
   0   7  11  544.25   26.20
   0   7  11  503.83   23.48
   0   7  11  506.40   24.88
   0  -7 -11  510.84   21.75
   0   7  11  514.44   25.41
   0  -7 -11  516.14   27.58
   0   7  12  162.56   13.21
   0  -7 -12  159.94   14.25
   0  -7 -12  167.41   10.97
   0  -7 -12  148.47   10.15
   0   7  12  172.77   13.08
   0   7  12  154.17   11.69
   0  -7 -13    2.37    2.13
   0   7  13    8.07    3.01
   0   7  13    1.63    1.77
   0  -7 -13    3.59    1.50
   0  -7 -14  487.00   22.63
   0   7  14  507.11   26.65
   0  -7 -14  504.06   28.67
   0   7  14  544.32   26.50
   0  -7 -15    3.76    1.94
   0   7  15    4.20    1.89
   0  -7 -15    0.21    1.82
   0   7  15   -0.76    1.82
   0  -7 -16   62.99    9.48
   0   7  16   51.40    7.67
   0   7  16   50.02    6.73
   0   7  17  106.33    9.88
   0  -7 -17  106.35    9.29
   0   7  17  107.64   11.75
   0  -7 -17   96.13   12.61
   0  -7 -18   26.31    4.66
   0   7  18   28.09    5.11
   0   7  18   26.07    5.87
   0  -7 -18   25.78    6.42
   0   7  19  215.83   17.50
   0   7  19  169.18   13.11
   0  -7 -19  175.85   17.55
   0   7  20    4.85    2.97
   0   7  20    2.38    2.47
   0   7  20    4.62    2.63
   0  -7 -20    5.68    4.28
   0   8 -18   12.79    4.63
   0   8 -18   10.94    4.65
   0  -8  18   13.98    4.75
   0  -8  18   12.97    5.73
   0  -8  18   10.32    4.04
   0   8 -17   40.70    8.35
   0  -8  17   58.62    8.73
   0  -8  17   53.85    8.49
   0  -8  17   60.46   10.20
   0   8 -17   46.22    7.99
   0  -8  16   10.28    3.84
   0  -8  16   10.90    4.70
   0  -8  16   11.22    4.09
   0   8 -16   14.87    4.67
   0   8 -16    8.04    4.10
   0  -8  15  129.46   12.95
   0  -8  15  145.69   15.85
   0   8 -15  119.38   12.36
   0   8 -15  121.91   13.40
   0  -8  15  118.69   12.32
   0  -8  14   35.15    6.51
   0  -8  14   34.18    6.45
   0  -8  14   32.54    7.07
   0   8 -14   46.42    7.64
   0   8 -14   38.39    7.33
   0  -8  13  451.43   28.43
   0  -8  13  491.65   26.45
   0   8 -13  460.51   27.46
   0  -8  13  484.90   26.14
   0   8 -13  463.65   26.07
   0   8 -12   42.97    7.38
   0   8 -12   51.34    7.44
   0  -8  12   34.17    6.84
   0  -8  12   51.47    7.47
   0  -8  12   41.06    6.75
   0  -8  12   34.80    5.31
   0  -8  11   87.53    9.85
   0  -8  11   80.22    9.40
   0   8 -11   93.38   10.21
   0  -8  11   80.24    7.97
   0  -8  11   79.32   10.36
   0   8 -11   71.78    9.42
   0   8 -10   16.64    4.37
   0  -8  10   23.44    4.94
   0   8 -10   17.21    4.44
   0  -8  10   23.54    5.65
   0  -8  10   15.56    3.83
   0  -8  10   18.61    3.84
   0  -8   9   40.33    7.19
   0   8  -9   53.04    7.67
   0  -8   9   43.45    6.64
   0  -8   9   60.61    7.65
   0   8  -9   61.20    7.81
   0  -8   8  142.87   11.23
   0   8  -8  150.24   12.72
   0  -8   8  144.52   12.33
   0  -8   8  153.32   12.79
   0   8  -8  139.08   12.09
   0  -8   7  764.90   32.89
   0  -8   7  744.24   32.82
   0  -8   7  793.40   31.40
   0   8  -7  734.96   32.72
   0   8  -7  724.63   32.85
   0  -8   7  764.73   35.04
   0  -8   6   68.63    8.63
   0  -8   6   50.48    7.22
   0  -8   6   58.08    6.70
   0  -8   6   53.81    7.05
   0   8  -6   58.51    7.54
   0   8  -6   49.31    6.78
   0  -8   5   46.08    6.48
   0  -8   5   43.65    5.98
   0   8  -5   55.71    7.14
   0  -8   5   52.71    7.07
   0   8  -5   57.69    7.24
   0  -8   5   54.49    7.55
   0  -8   4   30.82    5.58
   0  -8   4   23.10    4.46
   0   8  -4   31.84    5.17
   0  -8   4   15.74    3.82
   0  -8   4   22.26    4.56
   0   8  -4   20.50    4.05
   0  -8   3 2590.48   87.01
   0  -8   3 2742.79   86.87
   0   8  -3 2851.67   86.26
   0   8  -3 2747.11   86.93
   0  -8   3 2739.36   85.60
   0   8  -2  764.46   32.42
   0  -8   2  773.60   33.15
   0  -8   2  751.74   31.75
   0   8  -2  853.24   32.58
   0   8  -2  777.60   34.53
   0  -8   2  726.17   31.46
   0   8  -1   93.77    9.11
   0   8  -1  103.74    9.10
   0  -8   1  108.76   10.19
   0  -8   1  128.52   10.25
   0  -8   1  111.76    9.99
   0   8  -1   96.48    9.43
   0   8  -1  129.78   11.78
   0   8   0  158.46   12.04
   0  -8   0  176.93   12.88
   0   8   0  165.78   12.53
   0   8   0  170.05   11.83
   0  -8   0  159.72   11.54
   0  -8   0  174.94   12.88
   0  -8  -1   35.00    5.03
   0   8   1   45.46    6.20
   0  -8  -1   35.74    5.76
   0   8   1   38.69    5.55
   0  -8  -1   33.72    5.55
   0   8   1   35.29    6.05
   0  -8  -2  929.25   38.71
   0   8   2 1015.80   40.18
   0   8   2 1037.37   39.05
   0   8   2  932.83   37.51
   0  -8  -3  111.88    8.96
   0   8   3  114.08   10.76
   0  -8  -3   96.08    9.67
   0   8   4  308.13   18.50
   0  -8  -4  330.65   19.98
   0   8   4  363.50   19.73
   0   8   4  377.37   20.93
   0  -8  -4  365.02   19.25
   0  -8  -4  371.11   18.05
   0   8   5   81.22    8.53
   0   8   5   64.43    7.93
   0  -8  -5   79.31    9.10
   0  -8  -5   81.52    7.39
   0   8   5   78.32    8.54
   0   8   6    0.61    1.78
   0  -8  -6    1.42    1.40
   0   8   6    1.35    1.29
   0   8   6    2.34    1.82
   0  -8  -6    1.28    1.30
   0  -8  -7  800.39   30.65
   0  -8  -7  771.59   35.56
   0   8   7  873.04   34.53
   0   8   7  846.26   35.45
   0   8   7  757.37   33.39
   0   8   8  436.99   22.91
   0   8   8  465.81   23.81
   0   8   8  447.48   24.01
   0  -8  -8  491.42   26.08
   0  -8  -8  451.56   20.53
   0   8   9   15.14    3.77
   0  -8  -9   14.89    3.75
   0   8   9   14.88    3.66
   0  -8  -9   15.91    3.11
   0   8   9   17.97    4.62
   0  -8 -10  162.84   11.09
   0  -8 -10  183.55   15.52
   0   8  10  198.42   14.92
   0   8  10  164.88   13.26
   0  -8 -11    2.19    1.40
   0   8  11    5.00    2.87
   0  -8 -11    5.12    1.96
   0   8  11    5.57    2.92
   0   8  12  371.96   22.15
   0  -8 -12  351.22   17.87
   0  -8 -12  411.97   25.10
   0   8  12  370.77   21.54
   0   8  13  118.34   11.54
   0  -8 -13  108.59   12.46
   0  -8 -13  111.79    9.26
   0  -8 -13  103.03    8.81
   0   8  13  126.72   12.12
   0  -8 -14  126.28   14.03
   0  -8 -14  146.32   10.90
   0   8  14  144.66   13.16
   0   8  14  158.40   14.07
   0   8  15  116.30   12.09
   0  -8 -15  105.51    9.37
   0  -8 -15   99.76   12.40
   0   8  15  108.52   11.57
   0  -8 -16    3.70    2.79
   0   8  16    1.47    1.76
   0   8  16    1.28    2.33
   0  -8 -16   -0.16    1.30
   0  -8 -17   13.34    4.73
   0   8  17   10.35    3.41
   0  -8 -17    7.85    2.59
   0   8  17    6.48    3.25
   0   8  18   21.04    5.73
   0  -8 -18   19.93    6.22
   0   8  18   14.84    3.93
   0   8  19   38.69    6.43
   0   8  19   47.32    8.31
   0  -8 -19   33.14    8.04
   0   9 -16    0.19    2.09
   0  -9  16    1.91    2.30
   0  -9  16    4.14    3.57
   0   9 -16    4.11    2.90
   0  -9  16    5.98    3.15
   0   9 -15  116.71   13.78
   0   9 -15  133.11   13.77
   0  -9  15  119.70   15.04
   0  -9  15  120.78   12.88
   0  -9  15  115.39   12.66
   0  -9  14    3.32    2.75
   0   9 -14    2.03    2.60
   0  -9  14    4.93    4.12
   0  -9  14    6.56    3.37
   0   9 -14   -0.46    1.86
   0   9 -13  158.73   14.73
   0   9 -13  167.60   15.51
   0  -9  13  152.22   14.37
   0  -9  13  152.73   16.28
   0  -9  13  157.33   14.38
   0  -9  12  448.79   23.05
   0   9 -12  437.64   26.16
   0  -9  12  465.66   26.64
   0   9 -12  459.43   27.41
   0  -9  12  464.95   29.13
   0  -9  12  496.40   27.14
   0  -9  11   65.92    8.99
   0   9 -11   60.37    8.77
   0  -9  11   54.98    7.09
   0   9 -11   64.71    8.85
   0  -9  11   66.49    8.80
   0   9 -10  109.15   11.79
   0   9 -10  124.02   12.53
   0  -9  10  122.55   13.43
   0  -9  10  133.80   12.71
   0  -9  10  118.55   11.98
   0  -9  10  136.85   11.37
   0  -9   9   16.32    4.68
   0   9  -9   16.13    4.91
   0   9  -9   17.63    4.74
   0  -9   9   13.01    3.62
   0  -9   9   21.08    5.12
   0  -9   9   15.87    4.91
   0   9  -8   18.56    4.48
   0  -9   8   17.97    4.54
   0  -9   8   17.06    4.30
   0  -9   8   18.21    4.35
   0  -9   8   12.39    3.56
   0   9  -8   24.05    5.36
   0  -9   7  112.69   11.29
   0   9  -7  104.64   10.90
   0  -9   7   89.71    9.23
   0  -9   7   96.81   10.44
   0  -9   7  101.44   11.50
   0   9  -7  133.71   12.17
   0   9  -6   37.21    6.28
   0  -9   6   38.61    6.43
   0   9  -6   36.15    6.42
   0  -9   6   47.61    6.97
   0  -9   6   43.24    7.26
   0  -9   6   48.75    6.72
   0  -9   5  445.90   22.98
   0  -9   5  464.46   24.82
   0   9  -5  431.27   23.76
   0  -9   5  480.43   26.07
   0   9  -5  420.12   23.71
   0  -9   4 1063.81   43.71
   0  -9   4 1091.63   42.47
   0   9  -4 1092.73   43.90
   0   9  -4 1144.52   43.74
   0   9  -3  497.50   25.47
   0  -9   3  542.91   26.40
   0   9  -3  596.90   27.92
   0  -9   3  537.07   27.64
   0   9  -3  528.98   28.67
   0  -9   2 1089.35   43.43
   0   9  -2 1074.92   43.72
   0   9  -2 1092.47   46.23
   0  -9   2 1144.61   45.05
   0   9  -2 1213.81   43.87
   0   9  -1   47.40    6.81
   0  -9   1   47.06    6.80
   0  -9   1   33.43    6.00
   0   9  -1   49.75    6.62
   0   9   0  402.79   21.87
   0  -9   0  357.23   21.16
   0  -9   0  377.91   21.46
   0  -9  -1   20.04    4.63
   0   9   1   13.03    3.85
   0   9   1   23.62    4.98
   0  -9  -1   11.99    3.34
   0  -9  -2  318.45   17.74
   0   9   2  303.20   19.82
   0   9   2  295.05   18.43
   0  -9  -2  269.86   18.30
   0  -9  -2  327.32   19.04
   0   9   3  215.44   16.20
   0   9   3  205.25   15.02
   0  -9  -3  227.69   15.35
   0  -9  -3  207.84   15.81
   0  -9  -3  199.16   13.47
   0  -9  -4    0.39    1.34
   0   9   4    1.57    1.51
   0  -9  -4   -0.59    1.33
   0  -9  -4    3.57    2.24
   0   9   4    0.89    1.39
   0   9   5  314.57   20.31
   0  -9  -5  318.86   20.67
   0  -9  -5  317.32   17.63
   0   9   5  357.43   20.36
   0  -9  -6  912.77   37.02
   0   9   6 1152.78   43.07
   0  -9  -6  960.81   42.52
   0   9   6 1098.01   43.64
   0   9   7   67.76    8.45
   0   9   7   74.72    9.21
   0  -9  -7   69.32    9.20
   0  -9  -7   51.48    6.29
   0   9   8  388.94   22.00
   0  -9  -8  366.24   23.42
   0  -9  -8  381.67   19.07
   0   9   8  317.93   21.14
   0   9   9   14.51    4.32
   0   9   9    6.69    2.69
   0  -9  -9    4.85    2.90
   0  -9  -9   10.67    3.08
   0  -9 -10  260.19   15.52
   0  -9 -10  295.36   21.17
   0   9  10  325.60   20.05
   0   9  10  310.63   20.34
   0   9  11  172.75   14.41
   0  -9 -11  152.96   15.31
   0   9  11  172.22   14.96
   0  -9 -12   35.98    7.20
   0   9  12   26.55    5.51
   0   9  12   32.18    5.82
   0  -9 -13  494.04   23.65
   0   9  13  525.85   28.73
   0   9  13  544.55   28.36
   0  -9 -13  487.10   30.10
   0   9  14   69.28    9.70
   0  -9 -14   61.07    7.26
   0   9  14   57.99    8.80
   0  -9 -14   82.96   11.64
   0   9  15   64.65    9.49
   0  -9 -15   57.62    9.81
   0  -9 -15   64.45    7.43
   0   9  15   59.29    8.95
   0   9  16    4.91    3.20
   0   9  16    9.99    3.98
   0  -9 -16   15.54    5.00
   0   9  16    9.71    3.21
   0   9  17   70.25    8.90
   0   9  17   75.70   10.62
   0  -9 -17   80.25   12.12
   0  -9 -18  451.66   30.56
   0   9  18  414.18   26.92
   0   9  18  423.03   24.23
   0  10 -14    2.58    2.74
   0 -10  14    3.78    2.62
   0  10 -14    0.44    2.35
   0 -10  14    8.62    3.70
   0 -10  14    3.51    2.47
   0  10 -13   53.62    9.19
   0 -10  13   57.81    8.99
   0  10 -13   47.60    8.31
   0 -10  13   65.40   10.90
   0 -10  13   39.33    7.56
   0 -10  12    8.97    4.51
   0 -10  12    7.73    3.71
   0  10 -12    8.91    3.69
   0 -10  12    8.51    4.02
   0 -10  12    7.58    2.71
   0  10 -12    6.46    2.96
   0 -10  11   59.50    9.14
   0  10 -11   52.11    8.50
   0 -10  11   48.07    6.95
   0 -10  11   71.36   10.56
   0 -10  11   46.69    8.54
   0  10 -11   53.10    8.65
   0 -10  10   88.62    9.61
   0 -10  10  122.15   12.78
   0 -10  10   82.16   10.80
   0 -10  10   92.89   12.44
   0  10 -10   92.43   11.45
   0  10 -10   93.55   11.27
   0 -10   9    6.97    2.39
   0 -10   9   11.12    3.93
   0 -10   9    8.27    4.57
   0 -10   9   15.31    4.88
   0  10  -9   14.31    4.86
   0  10  -9    9.25    3.54
   0  10  -8    1.62    2.55
   0 -10   8    4.27    3.15
   0  10  -8    1.73    2.31
   0 -10   8   -3.93    3.28
   0 -10   8    1.43    2.19
   0  10  -7  206.75   16.68
   0 -10   7  217.72   16.98
   0 -10   7  222.70   15.84
   0 -10   7  169.71   16.14
   0  10  -7  196.51   16.21
   0  10  -6    7.50    3.43
   0 -10   6    7.54    3.51
   0 -10   6    4.10    2.16
   0 -10   6    3.04    2.81
   0  10  -6    0.70    1.63
   0 -10   5   32.00    6.52
   0 -10   5   25.35    5.45
   0  10  -5   15.00    4.48
   0 -10   5   30.51    6.05
   0  10  -5   12.46    3.68
   0 -10   4   -0.17    2.28
   0  10  -4    9.49    3.32
   0  10  -4    8.22    3.26
   0 -10   4    6.81    2.92
   0  10  -4   13.02    4.42
   0  10  -3    3.18    2.09
   0 -10   3   -2.57    2.57
   0  10  -3    1.34    1.98
   0 -10   3    4.72    2.78
   0  10  -3   -0.77    2.12
   0  10  -2   66.19    8.76
   0 -10   2   52.21    7.76
   0  10  -2   65.59    8.18
   0 -10   2   54.81    7.77
   0 -10   1    7.66    3.00
   0  10  -1   11.70    3.71
   0  10  -1   10.46    3.59
   0 -10   1    8.84    3.65
   0 -10   0  178.12   14.61
   0  10   0  136.58   12.88
   0 -10   0  134.88   12.80
   0  10   0  138.02   13.80
   0  10   1   13.42    4.15
   0 -10  -1   11.95    4.06
   0  10   1   13.71    4.35
   0 -10  -1   11.40    3.73
   0  10   2    7.50    3.88
   0  10   2    2.75    1.64
   0 -10  -2    4.08    2.23
   0 -10  -2    4.08    2.86
   0 -10  -3    4.81    2.83
   0  10   3    6.45    3.29
   0  10   3    4.57    2.11
   0 -10  -3    8.58    3.69
   0  10   4   83.24   10.43
   0 -10  -4   96.57   10.18
   0 -10  -4   79.36   10.24
   0  10   4   77.43    9.37
   0 -10  -5   17.16    4.65
   0  10   5   31.63    6.62
   0  10   5   34.01    6.36
   0  10   6  827.95   38.87
   0 -10  -6  846.22   39.78
   0  10   6  853.40   37.89
   0  10   7   26.91    5.67
   0 -10  -7   16.01    4.69
   0  10   7   28.24    6.36
   0  10   8  318.95   20.64
   0 -10  -8  294.57   22.01
   0  10   8  320.88   21.72
   0  10   9   42.13    7.44
   0  10   9   35.02    6.49
   0 -10  -9   38.42    7.61
   0  10  10   40.42    7.33
   0  10  10   49.01    7.66
   0 -10 -10   54.21    9.13
   0  10  11   71.44    9.65
   0 -10 -11   64.20   10.44
   0  10  11   72.57   10.10
   0  10  12   37.43    7.30
   0 -10 -12   35.60    7.73
   0  10  12   27.73    6.26
   0  10  13   49.02    8.09
   0 -10 -13   51.19    8.85
   0  10  13   54.75    8.82
   0  10  14   94.95   11.88
   0 -10 -14   89.40   12.76
   0  10  14   97.52   12.07
   0 -10 -15  139.37   16.12
   0  10  15  127.00   13.93
   0  10  15  151.88   14.96
   0  10  16  122.06   13.93
   0  10  16  144.73   14.97
   0 -11  11  315.39   25.29
   0  11 -11  302.77   22.63
   0 -11  11  318.41   22.88
   0  11 -11  329.61   24.11
   0  11 -10   92.25   12.14
   0 -11  10  104.50   11.12
   0 -11  10   87.54   11.42
   0  11 -10  108.99   12.69
   0 -11  10  120.76   14.33
   0  11  -9   59.76    9.39
   0 -11   9   56.19    8.11
   0 -11   9   58.19    9.73
   0  11  -9   66.49    9.74
   0 -11   9   81.03   11.00
   0  11  -8  803.47   38.66
   0 -11   8  723.67   37.28
   0 -11   8  721.97   39.09
   0  11  -8  717.82   36.97
   0 -11   8  783.39   35.70
   0 -11   7   -0.41    2.52
   0  11  -7    3.07    2.64
   0  11  -7    3.78    2.66
   0 -11   7    2.91    2.49
   0  11  -6  458.91   27.06
   0  11  -6  486.48   27.45
   0  11  -6  429.66   28.91
   0 -11   6  413.82   24.64
   0 -11   6  401.37   26.83
   0 -11   5    2.72    2.87
   0 -11   5    5.21    2.11
   0  11  -5    9.62    3.12
   0  11  -5    6.52    3.52
   0  11  -5    6.28    3.63
   0  11  -4   56.43    9.69
   0  11  -4   52.14    8.07
   0  11  -4   67.62    9.40
   0 -11   4   59.46    9.24
   0 -11   4   62.75    8.73
   0 -11   3  235.40   19.10
   0  11  -3  275.10   19.18
   0  11  -3  315.00   21.20
   0 -11   3  262.67   19.14
   0 -11   2    2.00    2.09
   0 -11   2    5.60    3.16
   0  11  -2    2.70    3.09
   0 -11   1   56.98    8.60
   0  11  -1   61.52    8.94
   0 -11   1   58.54    8.53
   0  11  -1   48.93    8.70
   0  11   0   24.97    6.59
   0 -11   0   32.39    6.38
   0 -11   0   32.95    6.62
   0  11   0   32.51    6.62
   0  11   1   53.57    8.29
   0 -11  -1   46.90    7.60
   0 -11  -1   36.95    6.79
   0  11   1   52.85    8.75
   0  11   2    0.54    1.82
   0  11   2    4.40    3.05
   0 -11  -2    2.05    2.73
   0  11   3    9.36    4.22
   0 -11  -3    6.30    3.46
   0  11   3    7.78    3.79
   0 -11  -3    3.10    3.30
   0  11   4  156.29   14.55
   0 -11  -4  162.74   15.38
   0  11   4  133.95   14.32
   0  11   5  145.68   14.84
   0  11   5  150.27   14.43
   0 -11  -5  163.11   15.78
   0  11   6  477.58   28.48
   0  11   6  466.29   27.01
   0 -11  -6  427.94   27.84
   0 -11  -7  377.32   26.08
   0  11   7  418.37   26.37
   0  11   7  388.33   24.39
   0  11   8   95.01   11.96
   0  11   8  101.63   11.69
   0 -11  -8  119.73   13.84
   0  11   9   68.75    9.59
   0 -11  -9   58.18    9.81
   0  11   9   52.96    9.03
   0  11  10   64.56    9.94
   0  11  10   56.88    9.25
   0 -11 -10   73.39   11.16
   0 -11 -11   12.28    4.99
   0  11  11   15.75    4.95
   0  11  11   11.21    4.41
   0  11  12  106.31   12.98
   0 -11 -12   80.83   12.22
   0  11  12   95.51   11.66
   0  11  13    0.93    1.96
   0  11  13    7.82    3.77
   0 -11 -13   11.99    5.67
   0  12  -8  613.50   33.76
   0 -12   8  570.99   34.87
   0  12  -8  555.87   32.65
   0 -12   8  521.79   29.39
   0 -12   7   57.26   10.04
   0  12  -7   60.06    9.83
   0  12  -7   70.03   10.38
   0 -12   7   73.86    9.76
   0  12  -7   54.27   10.32
   0  12  -6  440.70   27.30
   0  12  -6  425.05   29.85
   0 -12   6  387.89   24.89
   0  12  -6  380.37   25.58
   0 -12   6  377.76   26.84
   0  12  -5  137.64   16.02
   0  12  -5  112.46   13.30
   0 -12   5  127.11   14.63
   0 -12   5  121.70   13.08
   0  12  -5  158.54   15.10
   0  12  -4   89.84   11.33
   0  12  -4  103.99   12.45
   0 -12   4   70.10   10.08
   0 -12   4   73.34   10.71
   0  12  -3   33.86    7.03
   0 -12   3   36.22    7.34
   0 -12   3   42.36    8.28
   0  12  -2   83.13   12.32
   0 -12   2   63.41    9.51
   0 -12   2   62.67    9.74
   0  12  -2   70.18   10.00
   0 -12   1  819.50   40.30
   0 -12   1  874.92   41.74
   0  12  -1  806.79   42.82
   0  12  -1  873.99   41.37
   0  12   0  193.66   17.31
   0 -12   0  196.08   17.07
   0  12   0  175.93   17.44
   0 -12   0  182.80   16.84
   0  12   1  739.36   37.50
   0 -12  -1  733.29   37.86
   0  12   1  697.85   38.61
   0 -12  -1  755.35   37.14
   0  12   2  126.05   13.69
   0 -12  -2  150.47   14.46
   0  12   2  113.83   13.87
   0 -12  -2  140.91   14.80
   0 -12  -3   39.31    7.19
   0  12   3   50.18    8.36
   0  12   3   46.79    8.79
   0 -12  -3   40.55    7.91
   0  12   4   69.54   10.20
   0 -12  -4   78.82   11.40
   0  12   4   55.22    9.29
   0 -12  -5    4.54    3.15
   0  12   5    7.59    3.82
   0  12   5    0.92    2.33
   0 -12  -6   19.17    5.81
   0  12   6   28.06    6.78
   0  12   6   24.21    5.97
   0 -12  -7   29.29    7.19
   0  12   7   41.14    8.06
   0  12   7   42.36    8.17
   0 -12  -8   40.73    8.65
   0  12   8   32.48    6.88
   0  12   8   20.60    5.94
   0  12   9  356.28   25.66
   0  12   9  376.12   25.24
   0 -12  -9  379.22   27.74
  -1  12   6  179.81   18.03
   1 -12  -6  141.73   16.30
  -1  12   6  155.44   15.62
   1 -12  -5  123.89   14.95
  -1  12   5  129.35   15.26
  -1  12   5  125.87   14.01
  -1  12   4    5.38    3.45
   1 -12  -4    1.13    2.77
  -1  12   4    5.61    4.10
  -1  12   3   72.20   11.55
  -1  12   3   90.08   11.69
   1 -12  -3   76.97   11.49
   1 -12  -2  151.88   14.11
  -1  12   2  127.76   15.47
   1 -12  -2  151.52   15.83
  -1  12   2  130.69   14.40
   1 -12  -1  224.82   19.88
   1 -12  -1  240.90   18.54
  -1  12   1  236.78   21.14
  -1  12   1  234.49   19.35
   1 -12   0   11.83    4.39
  -1  12   0   14.29    4.55
  -1  12   0   10.36    4.86
   1 -12   0   12.90    4.92
   1 -12   1   16.03    5.33
  -1  12  -1   12.33    5.03
   1 -12   1   11.03    4.49
  -1  12  -1   18.29    5.55
   1 -12   2  161.44   15.36
  -1  12  -2  187.86   17.00
   1 -12   2  165.41   16.73
  -1  12  -2  167.62   17.90
   1 -12   3   68.15   10.60
  -1  12  -3   62.63   11.10
  -1  12  -3   69.30   10.22
   1 -12   3   51.06    8.84
   1 -12   4   13.61    4.96
  -1  12  -4   15.49    6.72
  -1  12  -4   11.53    4.21
   1 -12   4    7.39    3.79
   1 -12   5  327.46   23.74
  -1  12  -5  354.88   27.17
  -1  12  -5  381.91   25.18
   1 -12   5  314.54   23.68
   1 -12   6    3.85    3.69
  -1  12  -6   -2.73    2.66
   1 -12   6    8.77    4.07
   1 -11 -11  120.35   15.18
  -1  11  11  132.78   15.08
  -1  11  11  123.44   13.96
   1 -11 -10   36.17    8.52
  -1  11  10   36.25    7.74
  -1  11  10   34.45    7.39
  -1  11   9   28.12    6.75
   1 -11  -9   22.74    6.59
  -1  11   8   85.55   11.36
   1 -11  -8   96.18   13.00
  -1  11   8  120.50   14.13
  -1  11   7  125.74   14.43
  -1  11   7   82.41   10.75
   1 -11  -7  126.88   14.67
  -1  11   6    2.43    1.94
   1 -11  -6   -0.01    2.00
  -1  11   6    0.91    1.97
   1 -11  -5  136.17   14.85
  -1  11   5  130.59   14.59
  -1  11   5  131.97   13.74
  -1  11   4   71.97   10.91
  -1  11   4   67.58    9.54
   1 -11  -4   49.85    8.51
  -1  11   3   29.02    6.69
   1 -11  -3   22.61    5.96
  -1  11   3   27.52    5.62
  -1  11   2  384.29   26.49
  -1  11   2  429.94   25.58
   1 -11  -2  380.57   23.04
   1 -11  -2  377.02   25.55
  -1  11   1   15.44    5.46
  -1  11   1   16.42    4.33
   1 -11   0 1451.62   54.18
  -1  11   0 1348.39   54.49
  -1  11   0 1265.80   56.63
   1 -11   0 1275.11   55.13
  -1  11  -1   99.93   11.59
  -1  11  -1  128.22   14.44
   1 -11   1   97.46   11.18
   1 -11   1  109.57   12.59
  -1  11  -2  624.43   32.47
   1 -11   2  589.48   32.38
   1 -11   2  631.64   32.44
  -1  11  -2  594.44   34.66
  -1  11  -3  132.87   13.35
  -1  11  -3  146.47   15.85
   1 -11   3  105.53   12.13
   1 -11   3  135.37   13.81
   1 -11   4   26.19    6.36
   1 -11   4   32.96    7.10
  -1  11  -4   36.30    7.02
   1 -11   5  157.33   14.82
  -1  11  -5  126.36   13.48
  -1  11  -5  150.13   14.59
   1 -11   5  143.90   14.68
  -1  11  -6   68.50   10.95
  -1  11  -6   55.96    8.74
   1 -11   6   58.92    8.88
  -1  11  -6   46.77    8.09
   1 -11   6   69.94    9.98
  -1  11  -7   18.83    5.43
  -1  11  -7   17.74    4.87
   1 -11   7   23.98    6.14
  -1  11  -7   21.96    6.82
   1 -11   7   25.34    5.89
   1 -11   7   15.15    4.70
   1 -11   8  224.98   18.14
  -1  11  -8  222.16   18.40
   1 -11   8  242.58   20.42
  -1  11  -8  259.22   20.40
  -1  11  -8  232.03   21.56
   1 -11   8  231.47   19.63
   1 -11   9   29.77    6.23
   1 -11   9   25.08    6.29
   1 -11   9   22.62    6.36
  -1  11  -9   27.23    6.38
  -1  11  -9   17.47    5.40
   1 -11  10  141.52   15.06
   1 -11  10  127.94   14.53
  -1  11 -10  163.20   16.28
  -1  11 -10  124.94   13.80
   1 -11  10  130.30   13.42
   1 -11  10  146.93   16.23
  -1  10  14    2.26    3.30
   1 -10 -14    3.35    3.90
  -1  10  14   -1.72    3.13
  -1  10  13   10.29    5.27
  -1  10  13    4.56    3.05
   1 -10 -13    6.51    4.21
  -1  10  12   35.44    7.56
  -1  10  12   30.54    6.48
   1 -10 -12   21.52    5.98
  -1  10  11   54.29    8.97
  -1  10  11   74.57   10.27
   1 -10 -11   86.74   12.13
  -1  10  10    6.27    2.73
   1 -10 -10   10.81    4.76
  -1  10  10   12.55    4.89
  -1  10   9  118.78   12.56
   1 -10  -9  123.13   13.92
  -1  10   9  107.37   12.60
  -1  10   8  115.46   12.45
  -1  10   8  113.88   13.05
   1 -10  -8  147.79   15.42
  -1  10   7  131.59   14.12
   1 -10  -7  154.32   15.36
  -1  10   7  132.92   13.27
  -1  10   6  137.76   13.24
   1 -10  -6  164.33   15.85
  -1  10   6  151.36   15.03
   1 -10  -5  932.34   43.07
  -1  10   5  855.48   41.58
  -1  10   5  933.18   40.60
   1 -10  -4   31.29    6.31
  -1  10   4   26.79    5.56
  -1  10   4   28.24    6.59
   1 -10  -3  126.80   11.69
  -1  10   3  141.66   13.10
  -1  10   3  113.34   12.72
   1 -10  -3  107.88   12.42
   1 -10  -2    2.96    1.82
  -1  10   2    3.32    3.26
  -1  10   2    2.51    2.53
   1 -10  -2    4.85    2.43
  -1  10   1   15.13    4.32
   1 -10  -1   17.15    4.52
  -1  10   1   11.15    4.17
   1 -10  -1   23.83    5.81
   1 -10   0    3.77    2.78
   1 -10   0    6.18    2.90
  -1  10   0    5.83    2.83
  -1  10   0    9.66    4.34
  -1  10  -1  195.18   15.92
  -1  10  -1  209.11   17.99
   1 -10   1  216.45   17.05
   1 -10   1  204.27   15.76
   1 -10   2  104.74   11.12
  -1  10  -2  101.55   11.18
  -1  10  -2   99.34   12.37
   1 -10   2  129.30   12.96
   1 -10   3   61.04    8.90
   1 -10   3   80.65    9.98
  -1  10  -3   88.75   10.19
  -1  10  -3   64.91   10.10
   1 -10   4   51.46    7.84
   1 -10   4   59.08    8.40
  -1  10  -4   55.25    8.04
  -1  10  -4   56.66    8.36
  -1  10  -5  596.95   31.31
  -1  10  -5  638.88   35.15
   1 -10   5  645.44   31.96
   1 -10   5  602.94   31.73
   1 -10   5  689.16   33.90
  -1  10  -5  631.93   31.58
  -1  10  -6  121.84   12.50
   1 -10   6  136.35   13.10
  -1  10  -6  140.43   15.01
  -1  10  -6  154.25   14.23
   1 -10   6  125.76   13.21
   1 -10   6  171.04   15.24
   1 -10   7   70.84   10.31
   1 -10   7  100.80   10.95
   1 -10   7   89.69   10.98
   1 -10   7   89.95   11.11
  -1  10  -7   77.79   10.34
  -1  10  -7   86.68   10.45
   1 -10   8   10.66    4.02
   1 -10   8    6.18    3.62
   1 -10   8    6.69    3.27
  -1  10  -8   10.77    4.49
   1 -10   8    1.03    1.88
  -1  10  -8    7.08    3.43
   1 -10   9    7.24    3.35
  -1  10  -9    3.76    1.77
   1 -10   9    8.39    4.06
   1 -10   9    3.48    2.22
  -1  10  -9   18.36    4.86
   1 -10   9   14.25    4.76
   1 -10  10   15.57    4.65
   1 -10  10   23.72    5.72
   1 -10  10   12.48    4.79
   1 -10  10   16.30    4.07
  -1  10 -10   14.19    4.31
  -1  10 -10   23.54    6.31
   1 -10  11  227.01   17.24
   1 -10  11  251.78   19.87
   1 -10  11  243.04   20.64
   1 -10  11  248.55   19.74
  -1  10 -11  256.51   20.37
  -1  10 -11  249.02   19.06
   1 -10  12    7.85    4.33
   1 -10  12    3.45    2.67
   1 -10  12    6.97    3.25
  -1  10 -12    4.82    3.42
   1 -10  12    1.54    2.99
  -1  10 -12    6.04    3.45
   1 -10  13  131.75   15.79
  -1  10 -13  153.53   14.96
  -1  10 -13  208.88   18.77
   1 -10  13  194.96   17.44
   1 -10  13  152.66   15.45
   1 -10  13  169.69   14.60
  -1   9  16  175.57   16.95
   1  -9 -16  178.46   18.29
  -1   9  15  351.06   24.45
   1  -9 -15  308.68   19.38
  -1   9  15  320.18   22.35
   1  -9 -15  327.85   25.21
   1  -9 -14   86.48    9.27
  -1   9  14   97.51   11.42
   1  -9 -14   92.39   12.55
  -1   9  14   73.86   10.66
  -1   9  13   17.28    5.18
   1  -9 -13   18.37    4.91
  -1   9  13   12.17    4.59
   1  -9 -12   31.63    7.10
  -1   9  12   50.64    8.35
  -1   9  12   34.27    6.85
  -1   9  11    9.58    4.38
   1  -9 -11    3.43    2.15
  -1   9  11    6.78    3.29
  -1   9  10   31.10    6.68
   1  -9 -10   17.52    4.82
  -1   9  10   36.05    6.38
  -1   9   9   28.32    5.81
  -1   9   9   20.60    5.69
   1  -9  -9   32.37    6.71
  -1   9   8   59.48    8.32
   1  -9  -8   58.24    9.01
  -1   9   8   64.33    9.31
  -1   9   7   55.34    8.34
   1  -9  -7   43.52    7.74
  -1   9   7   51.26    7.57
  -1   9   6  344.94   22.11
  -1   9   6  338.57   20.51
   1  -9  -6  335.80   22.39
  -1   9   6  315.61   19.23
  -1   9   5    5.06    2.97
  -1   9   5    0.80    1.54
   1  -9  -5    0.94    1.57
  -1   9   5    4.27    2.99
  -1   9   4  507.29   28.13
  -1   9   4  485.23   24.86
  -1   9   4  558.50   27.51
   1  -9  -4  562.22   29.19
  -1   9   3  171.05   14.92
   1  -9  -3  173.80   14.92
  -1   9   3  132.29   11.73
  -1   9   3  179.10   14.15
   1  -9  -3  188.37   13.42
  -1   9   2   68.68    9.21
  -1   9   2   59.34    7.99
  -1   9   2   55.17    7.24
   1  -9  -2   54.48    8.38
  -1   9   1   27.64    5.03
   1  -9  -1   31.36    6.00
  -1   9   1   21.09    5.25
  -1   9   1   36.57    6.20
   1  -9   0   24.74    4.62
  -1   9   0   28.49    5.77
   1  -9   0   20.52    4.67
  -1   9   0   29.44    5.47
   1  -9   1   48.50    7.21
   1  -9   1   49.55    7.04
  -1   9  -1   34.19    5.74
  -1   9  -1   53.45    7.95
   1  -9   2   14.26    4.37
  -1   9  -2   17.80    4.81
   1  -9   2   13.93    3.96
  -1   9  -2   19.48    4.55
  -1   9  -3  309.60   19.47
   1  -9   3  310.50   19.89
   1  -9   3  363.97   21.69
  -1   9  -3  315.49   19.46
   1  -9   3  346.59   20.61
   1  -9   4  534.22   27.26
   1  -9   4  541.98   28.11
  -1   9  -4  561.91   27.78
  -1   9  -4  514.32   29.56
  -1   9  -4  505.48   26.71
   1  -9   4  524.64   27.42
   1  -9   4  610.95   29.04
   1  -9   5   85.05   10.16
   1  -9   5  102.61   11.07
   1  -9   5   96.04   10.73
  -1   9  -5   97.28   10.57
  -1   9  -5   98.07   10.27
  -1   9  -5   98.98   11.86
   1  -9   5  102.05   10.61
   1  -9   6  354.32   21.50
   1  -9   6  375.95   22.87
  -1   9  -6  389.36   22.90
  -1   9  -6  407.20   22.96
   1  -9   6  417.62   23.70
   1  -9   6  383.46   23.33
   1  -9   7  340.30   21.07
  -1   9  -7  311.79   20.21
   1  -9   7  315.85   20.70
   1  -9   7  306.38   20.87
   1  -9   7  293.04   19.07
  -1   9  -7  283.12   18.96
   1  -9   8   -0.05    1.58
   1  -9   8   -0.56    1.37
  -1   9  -8    2.46    1.90
   1  -9   8    3.89    2.39
   1  -9   8    2.75    2.39
  -1   9  -8    1.41    1.35
   1  -9   9  251.94   17.32
  -1   9  -9  274.27   19.47
   1  -9   9  254.80   18.66
   1  -9   9  262.60   19.71
  -1   9  -9  246.52   17.80
   1  -9   9  260.61   18.83
  -1   9 -10   45.06    7.24
   1  -9  10   46.08    7.61
  -1   9 -10   31.53    6.57
   1  -9  10   44.57    8.11
   1  -9  10   47.04    7.48
  -1   9 -11  103.06   11.27
   1  -9  11  107.02   12.00
  -1   9 -11   93.90   11.45
   1  -9  11  110.35   12.31
   1  -9  12   28.63    6.23
  -1   9 -12   29.03    6.03
   1  -9  12   33.19    7.30
  -1   9 -12   28.97    6.54
   1  -9  12   32.14    6.99
   1  -9  13   12.86    4.48
  -1   9 -13   17.68    4.79
   1  -9  13   14.92    5.52
   1  -9  13   21.95    5.90
  -1   9 -13   24.03    5.51
   1  -9  14  141.61   14.30
  -1   9 -14  149.91   15.50
   1  -9  14  150.07   14.77
  -1   9 -14  144.77   14.02
   1  -9  14  156.77   16.56
   1  -9  15  177.18   16.32
  -1   9 -15  160.51   15.05
  -1   9 -15  151.27   16.08
   1  -9  15  160.39   15.61
   1  -9  15  158.36   17.27
   1  -9  16   89.00   11.60
  -1   9 -16   81.23   10.69
  -1   9 -16   69.14   10.57
   1  -9  16   73.96   10.71
   1  -9  16   72.85   12.15
   1  -8 -18  225.34   20.62
  -1   8  18  228.71   19.28
   1  -8 -17   27.94    5.12
   1  -8 -17   39.82    8.21
  -1   8  17   27.29    6.32
  -1   8  17   22.81    4.54
  -1   8  16  190.26   14.03
  -1   8  16  182.84   16.69
   1  -8 -16  188.84   14.00
   1  -8 -16  150.03   16.20
   1  -8 -15   85.52   11.92
   1  -8 -15  122.52   10.89
  -1   8  15  116.80   12.95
   1  -8 -14    8.35    3.66
  -1   8  14   13.22    4.18
   1  -8 -14   13.71    3.61
  -1   8  14    6.00    3.71
  -1   8  13  271.43   18.77
   1  -8 -13  228.69   15.42
   1  -8 -13  222.07   19.05
  -1   8  13  251.39   18.89
  -1   8  12   67.40    9.15
  -1   8  12   60.55    8.46
   1  -8 -12   61.51    9.47
   1  -8 -11  726.37   36.15
  -1   8  11  682.28   34.18
  -1   8  11  743.35   33.84
  -1   8  10  195.85   14.66
   1  -8 -10  198.70   13.52
   1  -8 -10  218.33   17.49
  -1   8  10  210.76   15.64
  -1   8  10  236.63   17.46
   1  -8  -9  512.41   24.26
   1  -8  -9  541.64   29.49
  -1   8   9  525.22   25.91
  -1   8   9  551.71   28.96
  -1   8   9  602.30   28.35
   1  -8  -8   26.56    4.61
  -1   8   8   20.56    4.78
  -1   8   8   28.27    5.50
  -1   8   8   23.18    4.66
   1  -8  -8   20.11    4.71
  -1   8   7    4.71    2.43
  -1   8   7    0.54    1.55
  -1   8   7    5.70    2.61
   1  -8  -7    2.77    1.75
   1  -8  -7    4.60    2.52
  -1   8   6  160.98   12.31
  -1   8   6  156.65   13.47
   1  -8  -6  155.45   11.47
   1  -8  -6  147.77   13.43
  -1   8   6  151.11   12.45
  -1   8   5   41.34    5.90
   1  -8  -5   44.07    7.04
  -1   8   5   29.20    5.33
   1  -8  -5   29.65    4.81
  -1   8   5   33.74    6.21
  -1   8   4   23.75    4.75
   1  -8  -4   26.80    5.34
   1  -8  -4   28.27    4.85
  -1   8   4   19.59    4.80
  -1   8   3  169.34   14.08
  -1   8   3  156.51   12.39
   1  -8  -3  163.91   13.69
  -1   8   3  146.21   11.37
   1  -8  -3  139.18   11.17
   1  -8  -3  173.14   12.06
  -1   8   2  354.45   18.86
   1  -8  -2  307.78   19.75
   1  -8  -2  368.18   18.89
   1  -8  -2  311.95   17.94
  -1   8   2  351.73   19.70
  -1   8   2  384.83   21.90
   1  -8  -1  345.75   20.62
   1  -8  -1  397.15   20.37
  -1   8   1  366.66   19.22
  -1   8   1  365.03   21.81
   1  -8  -1  354.49   19.18
  -1   8   1  372.80   20.38
   1  -8   0   21.94    4.90
  -1   8   0   24.31    4.70
  -1   8   0   31.63    5.53
  -1   8   0   25.45    4.46
   1  -8   0   18.84    3.89
   1  -8   1  133.10   11.63
  -1   8  -1  123.60   10.83
   1  -8   1  145.70   11.44
   1  -8   2  163.54   12.90
   1  -8   2  176.00   13.77
  -1   8  -2  201.45   14.05
   1  -8   2  189.71   13.90
  -1   8  -2  176.00   13.07
   1  -8   2  169.20   12.95
   1  -8   3   25.22    5.05
   1  -8   3   24.66    4.99
  -1   8  -3   15.31    3.87
   1  -8   3   24.69    5.00
   1  -8   3   14.66    3.86
  -1   8  -3   23.62    4.55
  -1   8  -3   15.52    4.40
   1  -8   4 1442.98   54.00
   1  -8   4 1511.77   54.93
  -1   8  -4 1498.71   57.53
   1  -8   4 1651.45   56.52
  -1   8  -4 1643.17   55.55
  -1   8  -4 1476.12   54.10
   1  -8   4 1516.12   55.06
  -1   8  -5   14.42    3.98
   1  -8   5   11.24    2.96
  -1   8  -5    8.51    3.10
   1  -8   5    6.25    2.40
   1  -8   5   13.70    3.83
   1  -8   5    5.83    2.70
  -1   8  -6   95.99    9.67
   1  -8   6   94.18    9.98
   1  -8   6  111.51   11.00
  -1   8  -6   93.78    9.96
   1  -8   6  114.59   10.49
   1  -8   6  108.66   10.49
  -1   8  -7  198.00   14.71
   1  -8   7  222.06   16.05
  -1   8  -7  215.99   15.87
   1  -8   7  245.89   17.18
   1  -8   7  214.76   15.62
   1  -8   8  295.95   18.86
  -1   8  -8  249.74   16.91
  -1   8  -8  275.67   18.31
   1  -8   8  282.83   18.49
   1  -8   8  248.45   18.09
   1  -8   9  160.94   13.53
   1  -8   9  156.06   13.71
  -1   8  -9  140.22   13.09
   1  -8   9  162.44   14.34
  -1   8  -9  135.26   12.20
   1  -8  10  175.99   14.75
  -1   8 -10  216.80   16.49
   1  -8  10  182.33   15.69
   1  -8  10  201.90   15.58
  -1   8 -10  177.37   14.15
  -1   8 -11   47.66    7.11
  -1   8 -11   51.02    7.92
   1  -8  11   46.64    7.40
   1  -8  11   45.10    7.95
   1  -8  11   40.37    6.97
  -1   8 -12   18.83    4.62
   1  -8  12   17.84    4.54
   1  -8  12   12.94    4.58
  -1   8 -12   21.99    5.49
   1  -8  12   17.45    4.46
  -1   8 -13   27.93    5.59
   1  -8  13   32.33    6.32
   1  -8  13   26.42    5.90
  -1   8 -13   32.81    6.83
   1  -8  13   32.21    7.18
   1  -8  14  251.00   20.61
   1  -8  14  261.12   19.32
   1  -8  14  300.99   20.33
  -1   8 -14  231.43   18.89
  -1   8 -14  243.94   17.75
   1  -8  15   27.66    7.16
   1  -8  15   22.87    5.33
   1  -8  15   16.75    5.06
  -1   8 -15   18.44    4.69
  -1   8 -15   13.94    4.48
   1  -8  16  320.83   24.66
  -1   8 -16  301.84   22.14
   1  -8  16  268.96   20.48
  -1   8 -16  274.27   19.72
   1  -8  16  280.25   20.65
   1  -8  17  160.23   15.25
  -1   8 -17  121.10   12.75
   1  -8  17  130.85   15.65
   1  -8  17  164.97   15.23
  -1   8 -17  124.25   14.29
   1  -8  18   26.71    6.41
   1  -8  18   41.64    9.13
  -1   8 -18   43.85    8.68
   1  -8  18   31.36    6.56
  -1   8 -18   26.59    6.11
   1  -7 -19    1.80    2.63
  -1   7  19    5.49    3.04
   1  -7 -19    1.62    2.83
   1  -7 -18  233.75   19.95
  -1   7  18  234.37   14.99
  -1   7  18  227.18   18.80
   1  -7 -18  217.37   15.64
  -1   7  17    6.68    3.34
  -1   7  17   10.41    3.19
   1  -7 -17    5.29    2.52
   1  -7 -17   12.81    5.16
  -1   7  16  112.47    9.97
   1  -7 -16  146.75   15.19
  -1   7  16  140.49   13.89
   1  -7 -16  131.67   11.22
  -1   7  15  271.65   19.62
   1  -7 -15  277.30   20.92
  -1   7  15  280.81   16.49
   1  -7 -15  260.56   16.56
  -1   7  14   15.90    4.88
   1  -7 -14   16.51    4.12
   1  -7 -14   17.46    5.22
   1  -7 -13  628.56   28.00
  -1   7  13  631.14   31.45
   1  -7 -13  612.61   32.57
  -1   7  13  631.47   30.40
  -1   7  12  108.92   10.49
   1  -7 -12  103.24   11.60
  -1   7  12  105.88    9.32
  -1   7  12  126.90   11.46
  -1   7  12  122.99   12.02
  -1   7  11   85.81    9.80
  -1   7  11   79.32    7.97
   1  -7 -11   93.32   10.75
  -1   7  11   67.16    7.92
  -1   7  11   76.55    8.84
   1  -7 -10  787.79   31.92
  -1   7  10  850.71   36.82
   1  -7 -10  917.83   38.98
  -1   7  10  854.97   35.47
  -1   7  10  814.26   34.03
  -1   7  10  822.75   32.82
  -1   7   9   15.92    3.45
   1  -7  -9   15.89    4.33
  -1   7   9   22.21    4.57
  -1   7   9   12.45    4.16
   1  -7  -9   16.54    3.44
  -1   7   9   14.00    3.59
   1  -7  -8  638.32   31.21
   1  -7  -8  660.50   27.08
  -1   7   8  693.70   29.63
  -1   7   8  657.58   27.56
  -1   7   8  621.51   30.01
  -1   7   8  644.68   27.98
  -1   7   7  339.95   20.45
   1  -7  -7  359.85   21.30
   1  -7  -7  363.51   18.12
  -1   7   7  385.00   19.28
  -1   7   7  361.85   18.54
  -1   7   7  372.28   19.85
  -1   7   6  713.69   29.51
   1  -7  -6  719.93   32.75
  -1   7   6  699.07   29.23
  -1   7   6  681.32   31.77
   1  -7  -6  749.07   29.19
  -1   7   5  664.80   26.90
  -1   7   5  615.10   28.92
   1  -7  -5  587.80   28.56
   1  -7  -5  610.44   25.66
  -1   7   5  603.26   26.03
  -1   7   5  637.37   27.58
   1  -7  -4   19.83    4.65
  -1   7   4   17.25    3.73
   1  -7  -4   15.05    3.23
  -1   7   4   18.69    4.30
  -1   7   4   22.85    4.14
  -1   7   4   13.67    3.18
  -1   7   3  739.25   30.90
   1  -7  -3  768.14   29.81
   1  -7  -3  765.77   32.77
   1  -7  -3  801.50   30.42
  -1   7   3  754.89   30.34
  -1   7   3  750.79   32.94
   1  -7  -2  213.10   14.03
   1  -7  -2  229.11   13.34
   1  -7  -2  191.82   14.04
   1  -7  -2  225.45   13.45
  -1   7   2  200.98   12.86
  -1   7   2  221.26   13.97
  -1   7   2  187.50   12.34
  -1   7   2  217.44   15.06
  -1   7   2  211.90   14.26
   1  -7  -1  146.10   10.52
   1  -7  -1  142.89   11.20
  -1   7   1  154.52   12.52
   1  -7  -1  155.94   11.07
  -1   7   1  167.17   12.21
  -1   7   1  168.89   11.20
  -1   7   1  155.99   11.51
   1  -7  -1  147.76   11.75
  -1   7   1  158.47   11.26
   1  -7   0   48.00    5.77
   1  -7   0   41.03    5.42
  -1   7   0   45.07    5.82
   1  -7   0   42.28    6.03
  -1   7   0   51.31    5.88
  -1   7   0   46.33    6.62
  -1   7   0   46.76    6.26
   1  -7   0   35.80    5.55
   1  -7   1  340.88   18.41
  -1   7  -1  335.47   17.63
  -1   7  -1  341.35   18.29
   1  -7   1  299.02   17.05
  -1   7  -1  302.80   16.62
   1  -7   1  287.32   16.59
   1  -7   1  288.94   17.09
  -1   7  -1  290.55   16.45
   1  -7   1  322.15   17.12
   1  -7   1  288.44   17.24
   1  -7   2  108.92    9.81
   1  -7   2  110.83    9.70
   1  -7   2  103.69    9.25
  -1   7  -2  109.75    9.43
   1  -7   2  104.00    9.28
  -1   7  -2  121.80    9.84
  -1   7  -2  109.14    9.37
   1  -7   2  116.68   10.24
   1  -7   2  143.55   10.81
  -1   7  -2  118.32   10.92
  -1   7  -2  130.17   10.55
   1  -7   3  299.46   17.20
  -1   7  -3  297.25   18.23
   1  -7   3  281.49   16.38
   1  -7   3  292.48   16.49
   1  -7   3  290.20   16.50
   1  -7   3  259.68   15.95
   1  -7   3  246.86   15.52
  -1   7  -3  258.20   15.59
  -1   7  -3  284.97   16.29
  -1   7  -3  240.79   15.57
  -1   7  -4  595.65   27.00
   1  -7   4  580.29   27.01
   1  -7   4  631.16   27.38
   1  -7   4  639.63   27.60
   1  -7   4  696.38   28.91
  -1   7  -4  630.10   27.19
   1  -7   4  589.69   27.08
   1  -7   4  597.29   27.34
   1  -7   5  393.27   20.97
   1  -7   5  389.21   20.49
   1  -7   5  427.14   21.40
  -1   7  -5  415.32   20.66
   1  -7   5  373.46   20.45
  -1   7  -5  378.46   20.41
   1  -7   6    8.11    2.91
   1  -7   6    2.61    2.20
  -1   7  -6    5.24    2.16
   1  -7   6    3.75    1.99
  -1   7  -6    7.10    2.77
   1  -7   6   -0.45    1.05
   1  -7   7   61.76    7.44
   1  -7   7   76.77    8.26
  -1   7  -7   75.11    8.39
  -1   7  -7   55.04    6.86
   1  -7   7   49.57    6.84
   1  -7   7   64.61    7.98
  -1   7  -8   58.53    7.01
  -1   7  -8   71.82    8.34
   1  -7   8   69.72    8.11
   1  -7   8   68.10    7.98
   1  -7   8   78.20    9.06
   1  -7   9   11.93    3.41
   1  -7   9    6.85    2.64
  -1   7  -9   11.55    3.56
   1  -7   9   11.85    3.43
  -1   7  -9    9.19    3.39
   1  -7  10   18.19    4.40
  -1   7 -10   17.68    4.22
   1  -7  10    9.60    3.26
   1  -7  10   21.34    4.94
  -1   7 -10   24.99    4.75
   1  -7  10   16.31    3.69
   1  -7  11  113.07   12.21
  -1   7 -11  133.45   11.45
   1  -7  11  120.10   10.35
   1  -7  11  139.16   12.21
   1  -7  11  142.65   12.24
  -1   7 -11  113.73   11.64
  -1   7 -12   -1.22    1.71
   1  -7  12    1.03    1.92
  -1   7 -12    1.83    2.07
   1  -7  12    0.42    1.41
   1  -7  12    0.97    2.46
   1  -7  12    3.88    2.32
  -1   7 -13   25.23    5.52
  -1   7 -13   15.30    3.74
   1  -7  13   23.10    5.08
   1  -7  13   18.58    4.06
   1  -7  13   22.57    4.89
   1  -7  13   21.22    5.24
  -1   7 -14   69.38    9.27
  -1   7 -14   88.03    9.62
   1  -7  14   79.89    9.54
   1  -7  14   90.90   11.40
  -1   7 -15   61.44    8.34
  -1   7 -15   70.87    9.78
   1  -7  15   64.77    8.83
   1  -7  15   78.69   11.05
   1  -7  16    3.23    2.07
   1  -7  16    5.51    2.74
  -1   7 -16   -0.28    1.58
   1  -7  16    1.83    1.89
  -1   7 -16    1.01    1.95
   1  -7  17  145.81   15.72
  -1   7 -17  134.03   14.47
   1  -7  17  125.56   12.72
  -1   7 -17  135.86   13.18
   1  -7  17  126.32   13.04
  -1   7 -18   11.64    5.38
   1  -7  18   12.10    4.31
  -1   7 -18   13.57    4.58
   1  -7  18   25.88    7.10
   1  -7  18   22.53    5.49
  -1   7 -19   25.19    6.00
   1  -7  19   33.34    6.77
   1  -7  19   25.18    5.88
   1  -7  19   48.35    9.59
  -1   7 -19   36.10    8.19
  -1   6  20  154.15   15.06
   1  -6 -20  155.02   16.19
   1  -6 -20  155.95   13.13
  -1   6  20  178.28   16.42
  -1   6  19  180.63   16.55
  -1   6  19  200.49   17.10
   1  -6 -19  208.73   18.28
   1  -6 -19  187.07   14.45
   1  -6 -18  125.48   11.10
  -1   6  18  104.78   12.02
  -1   6  18   83.11    8.13
   1  -6 -18  103.95   12.43
   1  -6 -17  322.48   19.14
   1  -6 -17  342.61   23.51
  -1   6  17  341.61   17.77
  -1   6  17  316.65   21.48
  -1   6  16    2.07    1.74
  -1   6  16    3.19    1.65
   1  -6 -16    1.49    2.92
   1  -6 -16   -1.65    1.75
   1  -6 -15  379.07   20.01
  -1   6  15  408.72   23.72
  -1   6  15  378.06   18.72
   1  -6 -15  364.49   23.52
  -1   6  15  325.97   17.70
   1  -6 -14   13.61    3.58
  -1   6  14   13.85    3.28
  -1   6  14    9.86    3.71
   1  -6 -14    9.36    3.96
  -1   6  14    9.52    2.85
  -1   6  13  854.70   32.94
   1  -6 -13  901.70   34.71
  -1   6  13  929.28   38.65
   1  -6 -13  931.51   40.12
  -1   6  13  812.22   35.46
  -1   6  12  217.83   13.33
   1  -6 -12  235.93   17.36
  -1   6  12  237.12   16.56
  -1   6  12  244.69   15.94
   1  -6 -12  243.47   14.60
   1  -6 -11   31.79    6.04
  -1   6  11   21.97    4.08
  -1   6  11   27.42    4.74
  -1   6  11   27.77    4.17
  -1   6  11   25.34    5.24
  -1   6  10  158.71   12.90
   1  -6 -10  172.20   14.15
  -1   6  10  204.06   13.59
  -1   6  10  170.11   11.28
   1  -6  -9  549.52   27.56
  -1   6   9  567.29   26.92
  -1   6   9  526.02   25.20
  -1   6   9  608.82   25.57
  -1   6   9  604.85   24.31
  -1   6   8   59.79    6.85
  -1   6   8   46.58    5.74
  -1   6   8   50.54    5.60
  -1   6   8   46.47    6.47
   1  -6  -8   43.02    6.40
  -1   6   8   46.64    6.46
   1  -6  -8   38.64    6.21
  -1   6   7  709.88   28.39
  -1   6   7  607.59   28.37
  -1   6   7  633.65   28.29
  -1   6   7  688.70   27.17
   1  -6  -7  663.89   28.38
   1  -6  -7  622.33   25.57
   1  -6  -7  602.53   28.73
   1  -6  -7  667.38   29.75
  -1   6   7  715.41   26.84
  -1   6   6  362.41   17.04
  -1   6   6  326.98   16.52
  -1   6   6  349.63   17.78
   1  -6  -6  321.68   18.58
   1  -6  -6  330.94   17.99
  -1   6   6  331.79   18.49
  -1   6   6  346.39   18.46
   1  -6  -6  292.89   17.98
   1  -6  -6  327.52   16.07
   1  -6  -5  479.41   21.80
  -1   6   5  426.06   21.10
   1  -6  -5  428.33   22.11
  -1   6   5  440.01   19.68
   1  -6  -5  450.01   19.56
  -1   6   5  422.85   21.56
  -1   6   5  450.22   20.76
   1  -6  -5  430.13   21.91
  -1   6   4  390.84   18.18
  -1   6   4  379.67   18.75
   1  -6  -4  380.31   17.74
  -1   6   4  379.70   18.00
  -1   6   4  365.85   19.60
  -1   6   4  387.94   19.45
   1  -6  -4  429.22   20.19
   1  -6  -4  397.10   20.25
   1  -6  -3  633.74   28.12
  -1   6   3  654.06   26.12
  -1   6   3  631.11   26.74
  -1   6   3  633.55   28.13
   1  -6  -3  665.41   26.14
   1  -6  -3  674.29   27.79
  -1   6   3  733.41   28.77
   1  -6  -3  688.81   25.87
  -1   6   3  673.00   26.08
  -1   6   2  486.51   23.21
   1  -6  -2  495.38   20.92
  -1   6   2  531.37   21.54
  -1   6   2  550.95   23.47
   1  -6  -2  488.45   22.36
   1  -6  -2  464.15   22.68
   1  -6  -2  513.22   21.47
  -1   6   2  487.90   22.00
  -1   6   2  478.66   21.24
  -1   6   1  336.54   18.40
  -1   6   1  323.81   17.33
   1  -6  -1  327.62   17.39
  -1   6   1  355.60   16.64
   1  -6  -1  362.53   17.16
  -1   6   1  339.57   16.79
   1  -6  -1  345.13   18.15
   1  -6  -1  333.65   16.34
  -1   6   1  381.69   17.98
  -1   6   0 2688.85   79.53
  -1   6   0 2644.80   80.78
   1  -6   0 2598.25   81.27
  -1   6   0 2605.47   79.95
   1  -6   0 2623.01   80.06
   1  -6   0 2744.88   80.00
   1  -6   0 2567.25   80.89
   1  -6   0 2733.71   80.66
   1  -6   0 2631.48   81.65
  -1   6   0 2637.80   81.28
  -1   6   0 2598.61   82.70
   1  -6   1  903.67   35.46
   1  -6   1  857.00   34.98
  -1   6  -1  976.90   34.89
  -1   6  -1 1002.38   34.64
  -1   6  -1 1010.93   35.36
   1  -6   1  926.57   34.86
   1  -6   1  978.69   35.74
   1  -6   1 1027.79   35.37
  -1   6  -1  921.77   34.76
   1  -6   1  965.32   35.05
  -1   6  -1 1012.23   37.86
   1  -6   2   21.21    4.06
  -1   6  -2   26.73    4.06
   1  -6   2   26.04    4.44
   1  -6   2   25.76    4.46
  -1   6  -2   32.51    5.16
  -1   6  -2   27.63    4.78
   1  -6   2   27.25    4.30
  -1   6  -2   32.79    4.63
   1  -6   2   27.38    4.53
  -1   6  -2   26.72    4.30
   1  -6   2   34.31    4.86
   1  -6   3  590.84   24.93
  -1   6  -3  535.92   23.29
   1  -6   3  554.76   24.04
  -1   6  -3  538.20   23.87
  -1   6  -3  536.84   23.66
   1  -6   3  539.10   23.77
   1  -6   3  540.19   23.85
   1  -6   3  557.93   24.07
  -1   6  -3  582.08   24.11
   1  -6   4   46.63    5.90
  -1   6  -4   43.48    5.43
  -1   6  -4   41.22    5.53
   1  -6   4   48.85    6.05
   1  -6   4   57.76    6.44
  -1   6  -4   46.71    5.77
   1  -6   4   52.43    6.26
   1  -6   4   46.67    5.82
  -1   6  -4   48.88    5.85
   1  -6   5  763.31   29.70
   1  -6   5  648.99   28.29
   1  -6   5  664.67   28.30
  -1   6  -5  690.06   27.85
   1  -6   5  715.07   28.45
  -1   6  -5  688.69   28.44
  -1   6  -5  682.84   27.98
   1  -6   5  700.44   28.90
  -1   6  -5  686.66   28.65
  -1   6  -6  868.34   33.72
   1  -6   6  836.90   33.80
   1  -6   6  807.23   33.30
  -1   6  -6  867.48   33.19
   1  -6   6  850.48   33.11
   1  -6   6  880.23   33.69
  -1   6  -6  911.05   34.51
  -1   6  -6  894.54   33.42
   1  -6   6  822.41   33.86
   1  -6   7    0.01    0.99
   1  -6   7   -1.21    1.25
  -1   6  -7    3.54    2.04
  -1   6  -7    1.40    1.10
   1  -6   7   -0.65    1.03
   1  -6   7    0.34    0.79
  -1   6  -7    0.22    0.96
  -1   6  -7   -1.55    0.90
   1  -6   7    0.83    0.84
   1  -6   8  793.05   31.75
  -1   6  -8  710.32   30.14
  -1   6  -8  828.22   32.76
  -1   6  -8  804.07   31.95
   1  -6   8  803.36   33.30
   1  -6   8  681.75   30.57
   1  -6   8  746.74   30.79
  -1   6  -9  222.58   14.54
   1  -6   9  239.93   13.92
   1  -6   9  225.26   14.83
   1  -6   9  220.09   14.26
  -1   6  -9  233.34   15.31
   1  -6   9  224.25   14.53
   1  -6   9  224.57   15.54
  -1   6  -9  248.53   14.86
  -1   6 -10  142.17   11.76
   1  -6  10  111.63   10.14
  -1   6 -10  135.51   10.69
   1  -6  10  123.59   11.59
   1  -6  10  113.45    9.48
   1  -6  10  127.77   10.73
  -1   6 -11    4.23    2.15
   1  -6  11   12.81    3.82
   1  -6  11   13.80    3.55
   1  -6  11   16.16    4.07
   1  -6  11    8.00    2.68
  -1   6 -11    9.61    3.74
  -1   6 -12   13.99    3.94
  -1   6 -12   22.43    4.50
   1  -6  12   20.64    4.58
   1  -6  12   24.50    5.42
   1  -6  12   18.49    4.30
   1  -6  12   14.75    3.36
  -1   6 -13  328.69   19.12
   1  -6  13  337.05   19.58
   1  -6  13  326.64   18.11
   1  -6  13  335.55   20.04
  -1   6 -13  348.24   21.22
  -1   6 -14    6.63    2.82
   1  -6  14    6.90    2.47
   1  -6  14    9.42    3.00
   1  -6  14   10.88    3.44
  -1   6 -14   10.24    3.35
  -1   6 -15  113.68   11.06
   1  -6  15  106.77   11.12
  -1   6 -15  132.82   12.71
   1  -6  15  118.28   11.21
   1  -6  15  101.88    9.69
  -1   6 -16  327.17   22.03
   1  -6  16  363.04   21.25
   1  -6  16  361.30   22.09
  -1   6 -16  332.37   20.41
   1  -6  17   47.01    7.22
   1  -6  17   42.73    7.73
  -1   6 -17   40.10    7.42
  -1   6 -17   52.52    7.51
   1  -6  18  236.41   17.44
  -1   6 -18  227.54   18.79
  -1   6 -18  230.54   17.11
   1  -6  18  260.99   19.07
   1  -6  19   49.60    7.79
  -1   6 -19   34.77    7.06
   1  -6  19   40.05    7.36
  -1   6 -19   42.64    7.18
   1  -6  20    3.69    2.68
  -1   6 -20    4.93    3.63
   1  -6  20    0.42    2.08
  -1   6 -20    4.20    2.75
   1  -6  21   63.70    8.97
  -1   6 -21   49.83    8.91
   1  -6  21   67.87   10.25
  -1   6 -21   57.74    8.67
  -1   5  21  143.28   14.25
   1  -5 -21  175.32   16.71
  -1   5  21  146.80   15.16
   1  -5 -21  149.09   13.11
  -1   5  20    3.91    2.82
   1  -5 -20    2.79    1.89
  -1   5  20    4.28    2.55
   1  -5 -20    3.81    3.02
  -1   5  19  592.56   31.08
  -1   5  19  566.15   23.78
   1  -5 -19  527.86   26.66
   1  -5 -19  490.59   29.95
  -1   5  19  543.20   29.52
  -1   5  18   29.08    4.37
   1  -5 -18   33.33    5.76
  -1   5  18   32.92    6.49
  -1   5  18   42.81    7.32
   1  -5 -18   48.59    8.24
  -1   5  17   56.73    6.05
   1  -5 -17   71.12    8.18
   1  -5 -17   61.78    8.93
  -1   5  17   60.83    8.73
  -1   5  16  198.79   12.27
   1  -5 -16  222.10   14.72
  -1   5  16  197.62   15.94
   1  -5 -16  223.41   17.38
   1  -5 -15   12.10    4.09
  -1   5  15   12.93    4.07
   1  -5 -15   11.15    2.97
  -1   5  15   15.85    3.13
   1  -5 -14  171.09   14.45
  -1   5  14  181.63   14.42
   1  -5 -14  168.50   12.06
  -1   5  14  178.38   11.11
   1  -5 -13  595.33   25.31
   1  -5 -13  569.78   28.42
  -1   5  13  552.12   23.01
  -1   5  13  530.98   26.84
   1  -5 -12  536.94   27.61
   1  -5 -12  570.65   24.65
  -1   5  12  618.88   28.10
  -1   5  11  868.76   34.44
   1  -5 -11  930.44   33.42
   1  -5 -11  797.76   35.78
  -1   5  11  858.69   35.51
   1  -5 -11  807.19   35.54
  -1   5  11  906.57   34.28
  -1   5  11  884.50   31.38
  -1   5  10   60.41    6.72
   1  -5 -10   51.85    6.93
  -1   5  10   44.76    6.70
  -1   5  10   49.68    5.90
   1  -5 -10   47.66    6.27
  -1   5  10   53.20    5.40
   1  -5 -10   52.12    6.95
  -1   5  10   49.65    6.57
  -1   5   9  590.08   25.12
  -1   5   9  589.10   24.36
   1  -5  -9  625.75   26.24
   1  -5  -9  549.07   26.04
   1  -5  -9  558.28   26.58
  -1   5   9  560.77   25.94
  -1   5   9  602.57   23.21
  -1   5   9  543.34   26.35
   1  -5  -8  446.98   22.67
   1  -5  -8  451.13   22.46
  -1   5   8  461.80   20.43
  -1   5   8  466.48   19.55
  -1   5   8  484.95   23.29
  -1   5   8  474.41   22.46
   1  -5  -8  473.93   21.89
  -1   5   8  483.72   21.57
   1  -5  -7  979.92   38.30
  -1   5   7 1026.74   35.75
  -1   5   7  969.34   38.40
   1  -5  -7  986.18   38.32
  -1   5   7  983.36   37.77
  -1   5   7  983.63   36.49
   1  -5  -7 1137.37   38.48
  -1   5   7 1087.24   35.52
  -1   5   6  975.73   33.93
  -1   5   6  861.81   31.72
  -1   5   6  912.11   31.78
   1  -5  -6  864.70   34.63
   1  -5  -6  907.33   34.86
  -1   5   6  980.22   35.26
   1  -5  -6  849.54   33.29
  -1   5   6  914.54   34.10
  -1   5   6  886.19   34.90
  -1   5   5 2125.59   61.86
   1  -5  -5 1942.25   63.23
   1  -5  -5 1919.57   64.34
  -1   5   5 2002.03   61.46
  -1   5   5 2035.29   63.91
   1  -5  -5 1902.37   64.37
  -1   5   5 1964.47   64.21
   1  -5  -5 1957.98   61.10
  -1   5   4   77.86    6.58
  -1   5   4   87.23    7.38
   1  -5  -4   82.53    7.83
  -1   5   4   82.70    6.63
   1  -5  -4   84.10    7.72
  -1   5   4   87.41    7.97
   1  -5  -4   91.10    6.89
   1  -5  -4   96.45    7.86
  -1   5   4   84.57    7.45
  -1   5   3 1885.84   57.64
   1  -5  -3 1879.18   60.91
   1  -5  -3 1970.83   57.66
   1  -5  -3 1987.70   60.00
   1  -5  -3 1832.69   60.22
  -1   5   3 1919.12   59.81
   1  -5  -3 1873.05   57.76
  -1   5   3 1933.78   60.98
  -1   5   3 1789.54   58.49
  -1   5   3 1789.51   57.55
   1  -5  -2  445.81   18.77
  -1   5   2  459.23   19.01
  -1   5   2  438.23   18.36
  -1   5   2  457.63   19.61
   1  -5  -2  469.24   18.63
   1  -5  -2  454.55   19.84
  -1   5   2  464.70   20.12
  -1   5   2  425.89   20.23
   1  -5  -2  450.79   20.47
   1  -5  -1 1225.62   42.29
   1  -5  -1 1243.90   40.02
   1  -5  -1 1376.10   41.64
  -1   5   1 1239.98   42.86
  -1   5   1 1329.55   41.72
   1  -5  -1 1276.34   41.76
   1  -5  -1 1241.24   40.51
  -1   5   1 1297.61   40.24
  -1   5   1 1227.40   40.49
   1  -5   0   35.48    4.54
   1  -5   0   42.32    4.90
   1  -5   0   29.79    4.00
   1  -5   0   25.72    3.96
   1  -5   0   37.94    4.91
  -1   5   0   40.75    4.98
  -1   5   0   41.33    4.60
  -1   5   0   38.04    4.66
  -1   5   0   38.80    4.72
   1  -5   0   34.74    4.45
   1  -5   1  578.91   24.07
  -1   5  -1  632.58   23.99
   1  -5   1  616.15   23.86
   1  -5   1  609.70   24.46
   1  -5   1  625.59   23.72
  -1   5  -1  580.04   23.41
  -1   5  -1  616.80   23.13
  -1   5  -1  606.55   25.38
  -1   5  -1  594.59   23.39
   1  -5   1  597.52   23.76
   1  -5   1  589.67   23.81
   1  -5   2  613.25   23.96
  -1   5  -2  569.85   23.20
   1  -5   2  582.65   23.56
  -1   5  -2  567.05   23.55
   1  -5   2  564.63   23.01
  -1   5  -2  645.88   23.92
   1  -5   2  604.23   23.74
   1  -5   2  567.27   23.77
  -1   5  -2  603.75   23.70
  -1   5  -3 2024.19   63.07
   1  -5   3 2080.32   63.59
   1  -5   3 2042.52   63.84
  -1   5  -3 2147.25   63.98
   1  -5   3 1988.95   63.52
   1  -5   3 2000.41   63.39
  -1   5  -3 1990.49   63.53
  -1   5  -3 2134.27   63.50
   1  -5   3 2030.86   63.29
   1  -5   4  790.66   29.45
  -1   5  -4  846.68   29.28
   1  -5   4  781.12   29.14
   1  -5   4  758.18   28.60
   1  -5   4  758.96   29.19
  -1   5  -4  774.10   29.18
  -1   5  -4  783.05   28.78
  -1   5  -4  761.08   29.05
  -1   5  -5   78.03    7.12
   1  -5   5   60.68    6.21
   1  -5   5   84.70    7.03
  -1   5  -5   60.75    6.13
   1  -5   5   71.04    6.94
   1  -5   5   62.00    6.28
  -1   5  -5   69.66    6.49
   1  -5   5   62.37    6.42
  -1   5  -5   65.51    6.49
   1  -5   6  619.35   25.97
  -1   5  -6  576.02   25.55
  -1   5  -6  643.40   25.56
  -1   5  -6  640.42   25.32
   1  -5   6  635.72   25.33
   1  -5   6  586.36   25.21
   1  -5   6  724.53   27.59
  -1   5  -6  706.83   26.92
   1  -5   7    5.97    1.87
  -1   5  -7   11.85    3.00
  -1   5  -7    8.17    2.37
  -1   5  -7    9.91    2.73
   1  -5   7    6.25    2.14
  -1   5  -7   11.43    2.67
   1  -5   7    8.41    2.60
   1  -5   7   11.00    3.02
  -1   5  -8  433.19   21.29
   1  -5   8  494.16   20.49
   1  -5   8  433.99   20.70
   1  -5   8  459.17   20.63
  -1   5  -8  476.65   20.84
   1  -5   8  431.87   21.73
   1  -5   8  416.40   21.26
  -1   5  -8  483.62   21.21
   1  -5   8  462.43   21.45
  -1   5  -8  471.22   21.36
   1  -5   9  327.11   16.12
   1  -5   9  319.00   17.71
   1  -5   9  304.59   16.86
   1  -5   9  293.40   15.97
  -1   5  -9  314.54   16.23
  -1   5  -9  349.50   17.25
  -1   5  -9  270.94   16.47
   1  -5   9  308.41   16.55
   1  -5  10  444.16   21.91
  -1   5 -10  438.50   20.85
  -1   5 -10  437.26   22.27
  -1   5 -10  455.06   21.83
  -1   5 -10  475.88   21.70
   1  -5  10  449.68   21.42
   1  -5  10  481.48   20.86
  -1   5 -11 1321.44   46.69
   1  -5  11 1372.76   47.59
  -1   5 -11 1466.98   50.08
   1  -5  11 1298.04   45.55
  -1   5 -11 1352.90   47.88
  -1   5 -11 1361.80   47.27
   1  -5  11 1270.38   47.51
   1  -5  12  106.13    9.59
   1  -5  12  101.45    8.73
   1  -5  12  100.64    9.65
  -1   5 -12  111.01   10.39
  -1   5 -12  129.34   10.25
  -1   5 -13 1316.66   48.08
   1  -5  13 1402.94   48.93
   1  -5  13 1384.20   47.63
   1  -5  13 1396.57   50.13
  -1   5 -13 1289.69   50.08
   1  -5  14   77.81    8.88
   1  -5  14   70.13    7.46
  -1   5 -14   69.57    8.68
   1  -5  14   72.95    7.99
   1  -5  15    1.27    1.82
  -1   5 -15    7.00    2.49
  -1   5 -15   -0.54    1.43
   1  -5  15    3.34    1.75
   1  -5  15    3.19    1.92
   1  -5  16  157.85   13.70
   1  -5  16  189.97   13.85
  -1   5 -16  165.84   13.24
   1  -5  16  165.01   12.40
  -1   5 -16  182.95   15.07
  -1   5 -17  110.96   11.70
   1  -5  17   81.18    9.31
   1  -5  17  121.41   11.81
  -1   5 -17   76.17    9.00
  -1   5 -18   18.05    4.43
   1  -5  18   17.21    4.26
  -1   5 -18   23.75    5.54
   1  -5  18   21.61    5.24
   1  -5  19  632.18   31.93
  -1   5 -19  590.90   31.96
  -1   5 -19  588.37   29.77
   1  -5  19  587.98   29.28
   1  -5  20   41.89    7.03
  -1   5 -20   29.97    5.96
   1  -5  20   21.66    5.58
  -1   5 -20   35.57    7.12
   1  -5  21   92.22   11.48
  -1   5 -21   96.65   12.05
   1  -5  21   81.85   10.00
  -1   5 -21   90.76   11.00
   1  -5  22  157.10   15.23
   1  -5  22  164.53   14.48
  -1   5 -22  151.73   14.41
  -1   5 -22  140.98   15.04
  -1   4  22    4.14    2.65
   1  -4 -22    3.16    1.61
   1  -4 -22    2.41    2.69
  -1   4  22    6.32    3.36
  -1   4  21  420.74   25.23
  -1   4  21  393.76   25.51
   1  -4 -21  398.89   23.05
  -1   4  20  162.79   14.72
  -1   4  20  180.72   15.95
   1  -4 -20  191.40   16.76
   1  -4 -20  174.14   14.03
  -1   4  19  121.78   12.00
   1  -4 -19  142.56   12.12
  -1   4  19  118.18    8.84
   1  -4 -19  119.01   12.87
  -1   4  19  122.35   12.70
  -1   4  18   99.91    7.75
   1  -4 -18   91.01    9.56
   1  -4 -18   93.23   11.07
  -1   4  18   96.33   10.47
  -1   4  18   99.60   10.97
   1  -4 -17  141.29   13.42
  -1   4  17  139.97    9.57
  -1   4  17  146.09   13.19
   1  -4 -17  154.78   12.13
  -1   4  17  178.66   14.01
  -1   4  16   39.73    6.48
   1  -4 -16   33.93    5.37
   1  -4 -16   31.06    6.28
  -1   4  16   36.95    4.53
   1  -4 -15   30.18    5.00
  -1   4  15   33.01    4.25
   1  -4 -15   42.30    6.74
  -1   4  14   35.22    4.28
  -1   4  14   25.46    4.91
   1  -4 -14   33.62    5.96
   1  -4 -13    7.46    2.30
   1  -4 -13    8.88    3.07
  -1   4  13    5.82    1.87
  -1   4  13    8.60    3.30
  -1   4  12   80.56    8.42
   1  -4 -12   74.01    8.31
  -1   4  12   91.45    9.36
  -1   4  12   84.15    6.68
   1  -4 -12   80.46    7.56
   1  -4 -12   93.21    9.39
  -1   4  11 1058.69   39.70
   1  -4 -11  983.79   38.81
   1  -4 -11 1016.36   37.71
   1  -4 -11  975.32   35.69
  -1   4  11 1025.00   38.57
   1  -4 -11  960.50   38.58
   1  -4 -10  657.53   28.38
   1  -4 -10  640.65   26.90
   1  -4 -10  635.28   25.58
   1  -4 -10  705.61   28.98
  -1   4  10  641.81   26.64
  -1   4  10  624.09   27.55
  -1   4  10  679.59   28.94
   1  -4  -9   52.47    6.03
   1  -4  -9   53.97    6.61
  -1   4   9   58.94    6.64
  -1   4   9   52.95    5.90
   1  -4  -9   59.59    6.93
  -1   4   9   47.14    6.17
   1  -4  -8  936.20   34.47
  -1   4   8  969.77   35.64
  -1   4   8 1053.25   32.54
  -1   4   8  887.74   33.80
   1  -4  -8  925.08   35.59
  -1   4   8  922.10   35.70
   1  -4  -8  954.95   35.95
  -1   4   7   51.06    6.09
  -1   4   7   56.81    5.78
   1  -4  -7   53.80    6.16
  -1   4   7   59.38    5.43
   1  -4  -7   60.28    6.10
  -1   4   7   44.46    4.36
   1  -4  -7   39.57    5.36
  -1   4   7   54.52    6.13
  -1   4   6   62.27    6.50
  -1   4   6   54.07    5.95
  -1   4   6   60.67    5.39
   1  -4  -6   61.62    6.33
  -1   4   6   59.44    4.99
  -1   4   6   60.96    5.73
   1  -4  -6   51.97    5.95
   1  -4  -6   60.09    6.00
   1  -4  -5    3.86    1.38
  -1   4   5    5.58    1.49
  -1   4   5    3.77    1.49
  -1   4   5    7.62    2.41
   1  -4  -5    7.68    2.00
   1  -4  -5    6.78    1.93
  -1   4   5    3.10    1.40
  -1   4   5    5.33    1.58
  -1   4   5    7.77    1.80
  -1   4   4  168.75   11.01
   1  -4  -4  190.56   11.65
  -1   4   4  201.04   10.94
  -1   4   4  212.74   11.52
   1  -4  -4  220.06   12.31
  -1   4   4  203.95   10.23
  -1   4   4  216.15   10.45
   1  -4  -4  200.60   11.15
  -1   4   3  997.98   32.42
  -1   4   3  996.56   34.22
   1  -4  -3 1016.00   34.04
   1  -4  -3 1016.48   35.15
  -1   4   3  988.77   33.68
  -1   4   3  945.87   34.61
  -1   4   3 1040.52   33.00
   1  -4  -3  999.24   32.89
  -1   4   2  891.29   30.67
  -1   4   2 1028.42   32.91
   1  -4  -2  911.54   31.84
  -1   4   2  928.78   31.61
  -1   4   2  892.81   30.26
   1  -4  -2  997.96   31.52
   1  -4  -2  954.82   33.26
  -1   4   2  929.58   32.87
   1  -4  -2  892.68   32.58
   1  -4  -2  925.40   30.21
   1  -4  -1  440.26   18.31
   1  -4  -1  442.79   17.77
   1  -4  -1  422.56   18.59
  -1   4   1  437.14   17.99
   1  -4  -1  467.38   17.38
  -1   4   1  501.60   20.03
  -1   4   1  435.56   17.59
   1  -4  -1  462.35   17.95
  -1   4   1  454.12   17.23
  -1   4   1  453.87   18.68
  -1   4   0  321.35   13.83
   1  -4   0  353.01   14.89
   1  -4   0  347.74   15.64
  -1   4   0  312.94   15.58
  -1   4   0  338.17   14.55
   1  -4   0  337.07   15.01
   1  -4   0  331.56   14.64
  -1   4   0  376.15   15.94
   1  -4   0  338.95   15.39
  -1   4   0  347.62   14.99
   1  -4   0  335.59   14.17
  -1   4  -1  114.90    7.62
  -1   4  -1  108.82    7.34
   1  -4   1  122.15    8.08
   1  -4   1  107.61    7.18
   1  -4   1  122.72    7.84
   1  -4   1  115.05    7.65
  -1   4  -1  112.50    7.37
  -1   4  -1  109.60    7.03
  -1   4  -1  110.85    8.41
   1  -4   1  103.94    7.39
   1  -4   2  259.64   12.55
   1  -4   2  252.61   12.76
  -1   4  -2  277.25   12.94
   1  -4   2  240.27   12.24
  -1   4  -2  254.20   12.27
   1  -4   2  269.45   12.52
   1  -4   2  266.65   12.76
  -1   4  -2  247.83   12.24
  -1   4  -2  251.93   12.65
  -1   4  -3  587.62   22.38
   1  -4   3  586.67   22.36
   1  -4   3  581.64   22.19
  -1   4  -3  596.41   22.39
   1  -4   3  547.51   21.60
   1  -4   3  577.46   22.37
   1  -4   3  564.98   21.78
  -1   4  -3  570.02   21.71
   1  -4   4  493.69   20.56
  -1   4  -4  489.50   20.00
  -1   4  -4  527.93   21.04
   1  -4   4  601.05   21.38
   1  -4   4  533.65   21.21
  -1   4  -4  506.34   20.47
   1  -4   4  558.77   21.69
  -1   4  -4  492.65   20.69
   1  -4   4  534.52   20.90
  -1   4  -5   95.71    7.06
   1  -4   5   80.53    6.62
  -1   4  -5   81.69    6.90
   1  -4   5   86.10    7.05
  -1   4  -5   78.18    6.63
   1  -4   5   81.35    6.81
   1  -4   5   78.86    6.42
  -1   4  -5   81.54    6.40
   1  -4   6  163.09   10.40
  -1   4  -6  131.53    8.77
   1  -4   6  141.41    9.29
  -1   4  -6  141.17    9.48
   1  -4   6  159.80    9.49
  -1   4  -6  138.23    9.52
   1  -4   6  143.92    9.54
  -1   4  -6  155.79    9.55
   1  -4   7   36.49    4.70
  -1   4  -7   42.35    4.83
   1  -4   7   37.31    4.74
  -1   4  -7   32.92    4.35
   1  -4   7   35.42    4.39
   1  -4   7   34.50    4.33
  -1   4  -7   48.05    5.43
  -1   4  -7   43.83    4.81
   1  -4   8   10.42    2.48
  -1   4  -8    9.11    2.44
   1  -4   8   11.46    2.47
  -1   4  -8   11.58    2.70
   1  -4   8   12.51    3.00
   1  -4   8   12.87    2.77
  -1   4  -8   13.81    2.92
  -1   4  -9  534.83   22.16
  -1   4  -9  479.49   22.54
   1  -4   9  484.47   22.10
  -1   4  -9  546.19   21.92
   1  -4   9  515.64   23.11
   1  -4   9  519.26   21.28
  -1   4  -9  529.02   22.51
   1  -4   9  498.70   21.72
  -1   4 -10  168.61   10.84
   1  -4  10  167.95   10.46
   1  -4  10  158.21   10.67
  -1   4 -10  162.48   11.56
   1  -4  10  157.80   11.63
   1  -4  10  158.89   11.04
  -1   4 -10  136.20   10.37
  -1   4 -11  249.26   14.81
  -1   4 -11  256.15   14.41
   1  -4  11  263.50   15.71
  -1   4 -11  269.38   15.83
   1  -4  11  266.97   14.22
  -1   4 -11  240.83   13.84
   1  -4  11  234.10   13.93
   1  -4  11  256.87   14.97
  -1   4 -11  237.46   14.88
  -1   4 -12  421.50   20.13
   1  -4  12  403.33   19.64
  -1   4 -12  388.36   19.31
   1  -4  12  387.15   20.17
   1  -4  12  428.80   19.62
  -1   4 -12  405.75   20.39
  -1   4 -12  444.29   21.74
   1  -4  12  404.33   21.46
   1  -4  13    2.05    1.43
  -1   4 -13    0.33    0.97
  -1   4 -13    0.13    1.43
   1  -4  13   -0.23    0.88
   1  -4  13    0.20    1.05
  -1   4 -13    1.29    1.21
  -1   4 -14  697.14   28.75
   1  -4  14  672.08   29.65
   1  -4  14  654.55   28.28
   1  -4  14  669.41   27.99
   1  -4  15  162.47   11.75
   1  -4  15  161.39   12.91
   1  -4  15  156.29   11.88
  -1   4 -15  169.94   12.35
  -1   4 -15  160.24   13.04
  -1   4 -16   76.82    8.10
  -1   4 -16   63.54    8.27
   1  -4  16   86.63    9.39
   1  -4  16   64.69    7.47
   1  -4  16   69.89    7.84
  -1   4 -17  105.02   10.01
   1  -4  17  117.32   10.44
   1  -4  17   85.79    8.90
   1  -4  17   92.08   10.05
  -1   4 -17   93.68   10.29
   1  -4  18   22.92    5.18
   1  -4  18   23.73    4.77
  -1   4 -18   25.92    4.99
  -1   4 -18   17.95    4.70
   1  -4  19   52.17    7.73
   1  -4  19   63.16    7.93
  -1   4 -19   48.16    7.06
   1  -4  20   19.82    4.73
   1  -4  20   33.36    6.60
  -1   4 -20   24.61    5.29
  -1   4 -21    7.85    3.99
  -1   4 -21    2.59    2.28
   1  -4  21    2.56    2.31
   1  -4  22  208.90   17.62
   1  -4  22  205.92   15.74
  -1   4 -22  198.29   17.45
  -1   4 -22  185.00   15.69
  -1   3  23  278.99   21.75
  -1   3  23  305.14   21.25
   1  -3 -23  265.37   19.14
   1  -3 -23  252.77   20.38
  -1   3  22   41.55    7.78
  -1   3  22   42.66    7.61
   1  -3 -22   37.42    6.39
   1  -3 -21  128.84   12.21
   1  -3 -21  127.78   13.33
  -1   3  21  146.92   14.51
  -1   3  21  122.38   12.54
  -1   3  20  153.12   10.05
   1  -3 -20  172.02   15.26
   1  -3 -20  169.36   13.77
  -1   3  20  172.23   14.54
  -1   3  20  175.20   15.55
   1  -3 -19    9.91    3.93
  -1   3  19    9.64    2.57
  -1   3  19    9.10    3.45
  -1   3  19   12.87    4.01
   1  -3 -19   10.75    3.32
  -1   3  18  392.37   17.73
   1  -3 -18  433.34   24.52
   1  -3 -18  413.39   22.18
  -1   3  18  435.18   24.51
  -1   3  18  415.40   23.23
   1  -3 -17   26.60    5.29
  -1   3  17   33.80    6.08
  -1   3  17   37.71    4.32
   1  -3 -17   34.45    5.71
  -1   3  17   35.82    6.11
   1  -3 -16    1.79    1.56
   1  -3 -16    0.79    1.79
  -1   3  16    5.51    1.63
  -1   3  16    5.91    2.85
  -1   3  16    1.21    1.63
  -1   3  15  301.00   17.48
   1  -3 -15  274.90   16.19
  -1   3  15  254.22   17.13
   1  -3 -15  296.93   18.14
  -1   3  15  277.50   13.34
   1  -3 -14    5.78    2.08
  -1   3  14    4.19    1.63
   1  -3 -14    0.01    1.22
  -1   3  14    2.11    1.41
  -1   3  14    1.33    1.67
   1  -3 -13  797.82   33.77
   1  -3 -13  780.56   31.83
  -1   3  13  851.07   34.09
   1  -3 -13  813.07   31.25
  -1   3  13  799.50   27.66
   1  -3 -13  782.62   33.01
  -1   3  13  772.92   32.62
  -1   3  12  588.07   21.47
   1  -3 -12  634.88   25.93
  -1   3  12  539.36   25.69
   1  -3 -12  587.33   26.36
  -1   3  12  586.61   26.17
   1  -3 -12  611.28   24.72
   1  -3 -12  552.75   26.33
   1  -3 -11  317.64   17.46
  -1   3  11  309.75   17.14
  -1   3  11  305.01   13.30
   1  -3 -11  322.90   16.47
   1  -3 -11  306.73   16.99
   1  -3 -11  297.20   15.31
  -1   3  11  313.45   17.02
  -1   3  10 1717.09   56.73
   1  -3 -10 1642.67   53.88
   1  -3 -10 1657.44   56.50
  -1   3  10 1715.52   56.23
   1  -3 -10 1754.06   55.49
   1  -3 -10 1836.37   57.42
  -1   3  10 1698.79   51.48
   1  -3  -9  118.55    9.27
   1  -3  -9  115.33    8.04
   1  -3  -9   84.88    7.98
  -1   3   9  105.81    8.57
  -1   3   9  113.48    9.03
   1  -3  -9  118.79    8.56
  -1   3   8   14.64    3.02
   1  -3  -8   15.64    3.14
  -1   3   8   18.03    3.30
  -1   3   8   12.90    2.60
   1  -3  -8   15.69    2.75
   1  -3  -8   13.27    2.96
   1  -3  -8   13.13    2.56
  -1   3   7 1153.11   38.38
   1  -3  -7 1106.93   39.44
  -1   3   7 1153.23   39.82
   1  -3  -7 1149.25   38.54
   1  -3  -7 1240.68   40.52
  -1   3   7 1171.21   39.63
   1  -3  -6  948.78   32.49
  -1   3   6  923.66   32.16
   1  -3  -6  909.38   32.33
  -1   3   6  904.17   32.26
  -1   3   6 1021.23   31.73
   1  -3  -5  317.80   15.08
  -1   3   5  336.64   14.44
  -1   3   5  306.56   13.12
  -1   3   5  356.67   15.64
   1  -3  -5  299.69   14.78
  -1   3   5  329.69   15.27
   1  -3  -5  322.18   14.44
  -1   3   5  332.28   12.97
   1  -3  -4   16.85    2.70
   1  -3  -4   17.46    2.85
  -1   3   4   24.90    3.43
  -1   3   4   18.95    2.78
  -1   3   4   13.16    2.60
  -1   3   4   23.35    2.64
  -1   3   4   17.75    2.30
   1  -3  -4   27.29    3.31
  -1   3   3  473.11   18.24
  -1   3   3  497.22   19.15
  -1   3   3  522.02   17.35
   1  -3  -3  445.46   18.59
  -1   3   3  451.78   16.51
  -1   3   3  453.53   17.66
   1  -3  -3  449.59   17.84
   1  -3  -3  452.51   18.70
   1  -3  -2 6067.10  158.27
  -1   3   2 5532.81  159.48
  -1   3   2 5558.50  159.89
  -1   3   2 5693.39  158.11
  -1   3   2 6331.40  159.35
  -1   3   2 5412.30  160.63
   1  -3  -2 5860.31  161.15
   1  -3  -2 5878.98  159.98
   1  -3  -1  344.67   14.45
   1  -3  -1  330.90   13.87
  -1   3   1  316.84   12.41
  -1   3   1  280.95   12.87
   1  -3  -1  357.45   14.86
   1  -3  -1  310.61   12.28
   1  -3  -1  339.60   13.74
  -1   3   1  347.98   13.19
   1  -3  -1  305.32   13.07
   1  -3  -1  305.66   12.84
  -1   3   1  350.12   14.70
  -1   3   1  347.08   13.98
   1  -3   0 1796.03   51.44
  -1   3   0 1654.91   51.95
   1  -3   0 1748.64   52.35
  -1   3   0 1892.95   52.32
   1  -3   0 1743.49   52.89
  -1   3   0 1747.23   52.77
   1  -3   0 1891.07   52.93
  -1   3   0 1755.80   51.18
   1  -3   0 1731.72   52.05
   1  -3   1  679.13   23.54
  -1   3  -1  672.69   23.18
   1  -3   1  677.91   22.77
   1  -3   1  681.21   23.31
  -1   3  -1  735.62   22.92
   1  -3   1  694.17   23.40
   1  -3   1  685.20   23.87
  -1   3  -1  602.06   24.01
  -1   3  -1  708.37   23.31
  -1   3  -1  720.39   23.76
  -1   3  -2  781.31   25.51
   1  -3   2  757.75   25.57
  -1   3  -2  788.05   26.05
   1  -3   2  766.08   25.27
   1  -3   2  739.09   25.36
   1  -3   2  777.35   25.95
   1  -3   2  718.13   25.82
  -1   3  -2  792.33   26.25
  -1   3  -2  760.05   25.51
  -1   3  -3  915.97   28.69
   1  -3   3  866.63   28.43
  -1   3  -3  897.00   29.35
  -1   3  -3  963.40   29.30
   1  -3   3  857.02   29.15
   1  -3   3  891.50   28.91
  -1   3  -3  827.89   28.88
   1  -3   3  812.42   28.35
   1  -3   3  815.85   28.88
  -1   3  -4    7.63    1.60
   1  -3   4    9.02    2.00
   1  -3   4    5.10    1.55
  -1   3  -4    4.58    1.45
  -1   3  -4    6.03    1.76
   1  -3   4    5.32    1.69
  -1   3  -4    5.51    1.60
   1  -3   5  800.22   27.07
  -1   3  -5  792.54   26.93
   1  -3   5  895.53   28.27
  -1   3  -5  806.37   27.63
  -1   3  -5  713.93   27.42
   1  -3   5  836.90   28.52
   1  -3   5  797.05   27.96
  -1   3  -5  805.97   27.99
  -1   3  -6  536.75   20.61
   1  -3   6  547.60   19.85
  -1   3  -6  458.02   19.40
   1  -3   6  555.23   20.06
   1  -3   6  486.84   19.80
   1  -3   6  617.44   21.82
  -1   3  -6  501.38   20.57
  -1   3  -6  524.91   19.61
   1  -3   6  483.15   20.06
   1  -3   7    3.07    1.20
  -1   3  -7    2.96    1.05
  -1   3  -7    5.32    1.90
  -1   3  -7    4.64    1.56
   1  -3   7    4.43    1.56
   1  -3   7    5.42    1.74
   1  -3   7    5.67    1.76
  -1   3  -7    3.82    1.52
   1  -3   7    4.42    1.89
  -1   3  -8  130.72    8.35
  -1   3  -8  138.31    9.41
  -1   3  -8  144.83    9.07
   1  -3   8  134.81    8.84
   1  -3   8  157.01    9.14
  -1   3  -8  144.75    9.42
   1  -3   8  135.24    9.42
   1  -3   8  159.52    9.83
   1  -3   9   79.18    7.13
  -1   3  -9   80.26    6.63
  -1   3  -9   75.81    6.19
  -1   3  -9   80.59    7.12
   1  -3   9   74.31    6.73
   1  -3   9   71.66    6.18
  -1   3 -10   47.44    5.06
  -1   3 -10   44.16    5.45
   1  -3  10   53.26    5.83
  -1   3 -10   57.93    5.74
  -1   3 -10   51.95    5.86
  -1   3 -10   53.26    5.76
   1  -3  10   66.38    6.02
   1  -3  10   47.69    5.65
  -1   3 -11   20.48    3.31
  -1   3 -11   18.61    3.74
   1  -3  11   17.02    3.57
   1  -3  11   24.05    3.81
   1  -3  11   21.57    3.58
   1  -3  11   21.03    3.71
  -1   3 -11   25.13    4.19
  -1   3 -11   19.25    3.41
   1  -3  12  286.34   16.21
   1  -3  12  284.80   15.26
  -1   3 -12  307.89   15.66
  -1   3 -12  305.86   16.36
  -1   3 -12  289.67   16.36
   1  -3  12  312.74   15.63
   1  -3  12  292.01   16.73
  -1   3 -12  303.72   15.42
  -1   3 -12  291.68   16.47
   1  -3  13  434.70   21.40
   1  -3  13  437.69   20.22
  -1   3 -13  423.71   20.91
  -1   3 -13  431.79   20.00
  -1   3 -13  435.69   21.62
   1  -3  13  408.07   19.79
  -1   3 -13  453.57   20.44
   1  -3  13  457.94   22.45
   1  -3  14   49.95    5.87
  -1   3 -14   49.20    5.93
  -1   3 -14   49.85    6.73
   1  -3  14   48.26    6.41
  -1   3 -14   44.99    5.87
  -1   3 -14   44.08    5.59
   1  -3  14   46.03    5.87
  -1   3 -15  608.23   28.05
   1  -3  15  578.10   27.23
   1  -3  15  625.69   26.39
   1  -3  15  583.38   25.88
  -1   3 -15  627.50   26.54
  -1   3 -15  586.97   26.01
  -1   3 -16   10.88    3.20
  -1   3 -16   16.09    4.24
   1  -3  16    6.74    2.45
   1  -3  16   13.03    3.44
   1  -3  17  144.89   12.37
  -1   3 -17  158.09   13.16
  -1   3 -17  144.23   11.57
   1  -3  17  139.83   11.45
   1  -3  17  169.36   12.12
   1  -3  18   46.69    7.43
  -1   3 -18   32.83    5.93
   1  -3  18   38.99    5.83
  -1   3 -18   33.27    5.56
   1  -3  18   35.13    5.56
  -1   3 -19  318.13   20.37
  -1   3 -19  310.43   18.96
   1  -3  19  299.71   17.91
   1  -3  19  317.66   20.26
  -1   3 -20  100.34   10.50
   1  -3  20  127.50   12.63
   1  -3  20   98.52    9.98
  -1   3 -20  124.29   12.36
   1  -3  21    2.23    2.66
  -1   3 -21    6.63    3.17
  -1   3 -21    6.73    3.33
   1  -3  21    2.90    1.83
  -1   3 -22   27.78    6.16
  -1   3 -22   17.82    4.63
   1  -3  22   36.77    7.22
   1  -3  22   28.84    5.52
   1  -3  23  149.99   12.99
   1  -3  23  144.66   14.58
  -1   3 -23  145.78   14.96
  -1   3 -23  162.59   14.34
   1  -2 -23    5.90    2.83
  -1   2  23   12.96    4.59
  -1   2  23   16.57    4.93
   1  -2 -23    5.41    3.31
  -1   2  22   83.43   10.25
   1  -2 -22   88.31   10.20
   1  -2 -22   76.24    9.98
  -1   2  22  109.25   12.71
  -1   2  21   22.28    5.01
  -1   2  21   35.98    7.06
   1  -2 -21   30.00    5.81
   1  -2 -21   29.53    6.20
   1  -2 -20  296.45   18.96
  -1   2  20  264.28   13.66
  -1   2  20  276.46   18.62
  -1   2  20  300.56   20.64
  -1   2  19   70.11    8.38
  -1   2  19   59.05    5.68
  -1   2  19   54.07    8.43
   1  -2 -19   59.06    8.33
   1  -2 -19   68.34    8.28
   1  -2 -18  305.55   19.25
   1  -2 -18  289.40   18.11
  -1   2  18  317.29   20.18
  -1   2  18  290.28   18.17
  -1   2  18  276.99   13.67
   1  -2 -17  278.61   17.86
  -1   2  17  282.16   18.54
   1  -2 -17  260.64   16.72
  -1   2  17  290.00   17.53
  -1   2  17  289.63   13.63
  -1   2  16  293.83   17.07
  -1   2  16  264.22   12.77
   1  -2 -16  285.33   17.47
   1  -2 -16  280.83   16.80
  -1   2  16  245.52   16.94
  -1   2  15  531.56   25.91
  -1   2  15  556.81   26.52
  -1   2  15  560.67   25.53
   1  -2 -15  550.27   26.09
   1  -2 -15  580.57   25.66
  -1   2  15  569.03   21.19
  -1   2  14   12.93    3.41
   1  -2 -14    8.70    2.51
  -1   2  14   14.51    3.25
  -1   2  14   21.00    2.87
   1  -2 -14   16.06    4.09
   1  -2 -14   11.72    2.93
  -1   2  14   16.84    3.70
   1  -2 -14   17.97    3.96
  -1   2  13   27.55    4.84
   1  -2 -13   36.84    5.01
   1  -2 -13   30.60    4.74
  -1   2  13   33.49    5.11
  -1   2  13   29.64    4.49
   1  -2 -13   33.55    5.18
  -1   2  13   34.40    3.60
   1  -2 -13   31.89    5.29
   1  -2 -12 1176.10   43.80
   1  -2 -12 1137.27   42.51
  -1   2  12 1209.66   43.29
   1  -2 -12 1324.96   43.17
   1  -2 -12 1205.46   41.91
  -1   2  12 1197.35   41.87
  -1   2  12 1170.87   43.30
  -1   2  12 1261.42   38.03
   1  -2 -11  213.88   12.81
   1  -2 -11  208.93   12.09
   1  -2 -11  181.05   11.35
   1  -2 -11  200.73   13.13
  -1   2  11  224.77   13.22
  -1   2  11  194.46   12.52
  -1   2  11  187.34    9.13
   1  -2 -10  443.74   19.05
   1  -2 -10  460.02   20.27
   1  -2 -10  432.14   19.26
   1  -2 -10  438.85   20.61
  -1   2  10  438.96   20.05
  -1   2  10  470.99   20.62
  -1   2  10  437.56   16.09
   1  -2  -9  509.07   21.22
  -1   2   9  557.41   18.80
   1  -2  -9  538.00   22.95
  -1   2   9  554.73   22.90
   1  -2  -9  579.11   22.12
  -1   2   9  543.00   22.61
   1  -2  -9  541.20   22.43
   1  -2  -8 1783.83   57.25
   1  -2  -8 1883.70   59.49
   1  -2  -8 1876.16   57.92
  -1   2   8 1884.38   54.49
  -1   2   8 2067.72   59.80
  -1   2   8 2066.97   59.92
   1  -2  -8 1824.82   58.51
   1  -2  -7 2601.32   73.76
   1  -2  -7 2577.10   74.69
  -1   2   7 2496.92   74.63
   1  -2  -7 2473.90   74.82
   1  -2  -7 2413.38   72.90
  -1   2   7 2497.39   74.43
   1  -2  -6  918.65   32.07
   1  -2  -6  957.25   31.19
   1  -2  -6  977.12   32.12
  -1   2   6  919.02   31.89
  -1   2   6  927.48   30.96
  -1   2   6  939.62   31.94
   1  -2  -5  233.84   10.95
  -1   2   5  256.59   11.94
   1  -2  -5  231.85   11.49
  -1   2   5  226.89   10.86
   1  -2  -5  247.26   11.84
  -1   2   5  245.09   11.71
  -1   2   4   88.99    6.19
   1  -2  -4   68.64    5.16
  -1   2   4   71.29    5.60
   1  -2  -4   87.20    6.13
  -1   2   4   90.10    5.76
  -1   2   4   93.26    4.83
   1  -2  -4   83.06    5.95
  -1   2   3  134.11    6.26
  -1   2   3  156.46    8.11
   1  -2  -3  147.62    7.87
   1  -2  -3  141.56    7.37
  -1   2   3  145.92    7.87
   1  -2  -3  135.07    7.67
  -1   2   3  136.74    6.29
   1  -2  -2 5965.12  189.76
  -1   2   2 5656.43  189.75
   1  -2  -2 6912.68  188.52
  -1   2   2 8169.25  190.73
   1  -2  -2 6986.81  190.87
  -1   2   2 7583.97  190.06
   1  -2  -2 8351.22  190.78
  -1   2   1 2381.96   66.17
   1  -2  -1 2304.59   67.54
   1  -2  -1 2277.87   66.88
  -1   2   1 2646.55   67.30
  -1   2   1 2468.48   68.04
   1  -2  -1 2377.32   66.11
  -1   2   1 2662.27   68.17
   1  -2  -1 2271.90   67.68
  -1   2   1 2298.10   68.56
   1  -2  -1 2320.17   68.67
   1  -2  -1 2453.70   68.65
  -1   2   0  174.72    7.63
  -1   2   0  177.10    6.93
   1  -2   0  173.73    8.01
   1  -2   0  175.52    7.76
  -1   2   0  177.50    8.04
   1  -2   0  188.24    7.15
   1  -2   0  164.28    8.29
   1  -2   0  177.27    7.86
  -1   2   0  173.25    7.48
   1  -2   0  172.09    7.51
   1  -2   1  578.03   19.38
   1  -2   1  544.31   18.20
  -1   2  -1  577.96   19.41
  -1   2  -1  573.86   19.37
   1  -2   1  559.07   18.95
  -1   2  -1  566.97   18.93
   1  -2   1  574.29   19.45
   1  -2   1  572.49   18.88
  -1   2  -1  598.74   18.95
  -1   2  -2   15.25    2.13
  -1   2  -2   14.58    1.97
   1  -2   2   15.28    1.99
   1  -2   2   20.33    2.41
   1  -2   2   17.17    2.00
  -1   2  -2   14.04    2.05
  -1   2  -2   15.47    1.88
   1  -2   2    9.44    1.63
   1  -2   3 2286.51   64.63
  -1   2  -3 2394.71   64.87
  -1   2  -3 2186.71   63.35
   1  -2   3 2237.00   63.48
  -1   2  -3 2349.29   64.39
   1  -2   3 2294.64   64.68
   1  -2   3 2476.38   64.72
  -1   2  -4 7943.14  217.54
   1  -2   4 7447.01  217.30
   1  -2   4 8740.19  218.62
   1  -2   4 8658.03  217.08
  -1   2  -4 7851.51  217.90
  -1   2  -4 7809.34  217.90
   1  -2   4 7988.63  218.06
  -1   2  -5  145.01    8.15
   1  -2   5  149.29    7.44
   1  -2   5  149.01    8.28
  -1   2  -5  159.93    8.51
  -1   2  -5  163.00    8.24
   1  -2   5  165.01    8.63
   1  -2   5  155.78    8.07
  -1   2  -5  148.37    7.43
   1  -2   5  165.46    8.32
   1  -2   6  170.53    8.60
  -1   2  -6  146.06    8.06
   1  -2   6  169.72    8.94
   1  -2   6  147.42    7.59
  -1   2  -6  142.03    8.29
   1  -2   6  141.08    8.40
  -1   2  -6  146.57    8.49
  -1   2  -6  141.28    7.52
   1  -2   6  149.49    8.20
   1  -2   7  164.61    8.94
  -1   2  -7  167.94    9.11
  -1   2  -7  155.16    9.29
   1  -2   7  172.41    9.63
  -1   2  -7  165.30    8.53
   1  -2   7  172.00    9.56
   1  -2   7  184.20    9.35
  -1   2  -7  167.37    9.41
   1  -2   8  228.22   11.41
   1  -2   8  226.54   11.36
  -1   2  -8  228.02   11.84
   1  -2   8  229.24   11.95
   1  -2   8  252.44   12.58
  -1   2  -8  229.13   10.95
  -1   2  -8  230.50   12.01
  -1   2  -8  258.22   11.95
   1  -2   9    5.49    1.61
  -1   2  -9    3.68    1.49
  -1   2  -9    6.12    1.83
   1  -2   9    5.60    2.00
  -1   2  -9    3.40    1.53
   1  -2   9    4.96    1.52
   1  -2   9    5.77    1.79
   1  -2  10  154.47   10.17
  -1   2 -10  167.50    9.85
  -1   2 -10  181.28   10.10
  -1   2 -10  169.17   10.59
  -1   2 -10  163.31   10.35
   1  -2  10  156.32    9.59
  -1   2 -10  158.44    9.45
   1  -2  10  167.58   10.14
   1  -2  10  169.05   10.69
  -1   2 -10  187.06   10.91
  -1   2 -11  203.81   11.29
  -1   2 -11  221.70   11.56
   1  -2  11  207.19   12.38
  -1   2 -11  200.74   12.19
   1  -2  11  184.23   10.86
   1  -2  11  197.26   12.04
   1  -2  11  197.96   11.47
  -1   2 -11  185.87   11.14
  -1   2 -11  221.06   12.39
  -1   2 -12  212.60   12.29
   1  -2  12  245.51   14.16
  -1   2 -12  262.83   14.28
   1  -2  12  239.13   13.26
   1  -2  12  235.76   12.79
  -1   2 -12  241.65   13.97
  -1   2 -12  243.10   13.19
   1  -2  12  245.09   13.97
  -1   2 -12  246.46   14.10
  -1   2 -12  234.17   12.81
  -1   2 -13    4.24    1.81
  -1   2 -13    5.33    2.12
  -1   2 -13    4.42    1.97
  -1   2 -13    2.05    1.57
   1  -2  13    8.90    2.46
   1  -2  13    6.83    2.53
   1  -2  13    8.65    2.85
  -1   2 -13    8.40    2.11
   1  -2  13    5.14    1.58
  -1   2 -13    8.97    2.81
   1  -2  14  354.14   17.85
  -1   2 -14  323.63   18.16
  -1   2 -14  340.84   17.17
  -1   2 -14  344.07   18.14
  -1   2 -14  341.57   17.19
   1  -2  14  339.17   18.57
  -1   2 -14  353.96   17.46
   1  -2  14  349.84   18.50
  -1   2 -14  340.42   18.33
   1  -2  14  339.90   16.89
   1  -2  15   46.42    5.96
   1  -2  15   39.09    5.74
  -1   2 -15   55.44    6.99
   1  -2  15   58.39    7.18
   1  -2  15   45.88    5.50
  -1   2 -15   53.28    6.18
  -1   2 -15   52.51    6.65
  -1   2 -15   44.22    6.07
  -1   2 -15   48.42    5.77
  -1   2 -15   52.20    6.12
  -1   2 -16  468.62   22.21
   1  -2  16  461.95   23.66
  -1   2 -16  504.52   23.02
   1  -2  16  466.73   22.97
  -1   2 -16  483.48   22.66
  -1   2 -16  507.53   24.36
   1  -2  16  507.33   22.50
   1  -2  17    7.62    2.66
  -1   2 -17   11.52    3.12
  -1   2 -17    8.77    3.00
   1  -2  17    6.16    2.11
   1  -2  17   12.63    3.22
  -1   2 -17    7.83    2.90
  -1   2 -17    9.37    3.06
  -1   2 -18  204.49   14.20
  -1   2 -18  201.64   14.90
   1  -2  18  191.53   13.96
  -1   2 -18  222.41   14.64
   1  -2  18  198.17   14.89
   1  -2  18  211.93   13.82
   1  -2  19   18.72    4.28
  -1   2 -19   25.10    5.21
   1  -2  19   15.07    3.46
  -1   2 -19   20.63    4.22
  -1   2 -19   25.06    4.78
  -1   2 -20  133.58   11.74
   1  -2  20  131.17   11.02
  -1   2 -20  113.99   10.87
  -1   2 -20  124.60   12.18
   1  -2  20  118.74   11.90
  -1   2 -21    6.97    3.39
  -1   2 -21    5.47    3.18
   1  -2  21   11.18    3.63
  -1   2 -21    8.51    3.46
   1  -2  21    2.28    1.86
   1  -2  22   49.76    8.04
  -1   2 -22   38.64    6.54
  -1   2 -22   59.60    7.98
  -1   2 -22   31.40    6.23
   1  -2  23  153.68   14.66
  -1   2 -23  125.22   13.26
   1  -2  23  133.97   11.76
  -1   2 -23  115.19   12.02
   1  -2  24    2.80    2.32
  -1   2 -24   -0.86    2.32
  -1   2 -24    9.46    3.99
   1  -2  24    6.65    4.19
   1  -1 -23   42.58    7.66
  -1   1  23   39.92    7.10
   1  -1 -23   39.62    7.00
   1  -1 -22  344.55   21.75
   1  -1 -22  324.76   21.56
  -1   1  22  338.07   21.61
  -1   1  21   62.80    9.34
   1  -1 -21   59.95    8.16
  -1   1  21   55.93    7.72
   1  -1 -21   49.51    7.73
   1  -1 -20    1.37    1.36
  -1   1  20    3.59    2.29
  -1   1  20    7.07    1.96
  -1   1  20    2.23    2.01
   1  -1 -20    9.00    3.25
   1  -1 -19  529.96   26.58
  -1   1  19  513.29   21.09
  -1   1  19  539.40   28.52
   1  -1 -19  551.65   27.37
  -1   1  19  546.22   26.74
   1  -1 -18    4.39    2.41
  -1   1  18    5.11    2.97
  -1   1  18    2.97    1.65
   1  -1 -18    4.02    2.63
  -1   1  18    1.90    1.11
  -1   1  17 1369.51   51.27
   1  -1 -17 1404.07   49.49
  -1   1  17 1336.64   42.56
  -1   1  17 1276.78   47.79
   1  -1 -17 1411.01   49.76
  -1   1  17 1215.14   47.98
  -1   1  16   26.50    5.00
   1  -1 -16   29.82    4.93
  -1   1  16   26.60    3.37
  -1   1  16   19.71    4.35
  -1   1  16   29.74    4.93
   1  -1 -16   27.96    5.02
   1  -1 -15  255.83   15.66
  -1   1  15  281.37   15.74
  -1   1  15  263.86   15.88
  -1   1  15  260.92   16.78
  -1   1  15  262.67   12.10
  -1   1  14   72.70    5.35
   1  -1 -14   79.44    7.82
  -1   1  14   80.46    7.79
  -1   1  14   72.66    7.15
  -1   1  14   84.66    8.56
   1  -1 -14   69.57    8.03
   1  -1 -14   62.43    6.96
   1  -1 -14   64.02    7.04
  -1   1  13  406.37   21.00
  -1   1  13  440.72   16.68
   1  -1 -13  438.81   20.33
   1  -1 -13  458.62   20.77
  -1   1  13  445.76   20.78
   1  -1 -13  449.98   22.25
   1  -1 -13  453.93   20.89
  -1   1  13  409.74   19.53
   1  -1 -12  127.07   10.16
  -1   1  12  122.20    9.15
  -1   1  12  110.58    6.44
   1  -1 -12  108.07    8.53
   1  -1 -12  108.95    8.71
  -1   1  12  126.28    9.69
   1  -1 -12  108.60    8.69
  -1   1  12  125.00    8.88
   1  -1 -11  336.30   17.29
   1  -1 -11  328.76   16.12
  -1   1  11  346.09   17.04
   1  -1 -11  345.68   16.15
  -1   1  11  287.12   12.24
  -1   1  11  325.42   15.42
  -1   1  11  336.55   16.22
   1  -1 -11  333.13   16.15
  -1   1  10  691.03   26.85
   1  -1 -10  732.16   26.43
   1  -1 -10  762.93   28.24
   1  -1 -10  626.47   25.42
  -1   1  10  691.25   26.11
  -1   1  10  682.79   22.22
   1  -1 -10  631.67   25.27
  -1   1  10  659.01   25.03
   1  -1  -9  760.92   27.19
  -1   1   9  748.89   27.15
   1  -1  -9  705.79   26.61
   1  -1  -9  733.46   28.16
  -1   1   9  748.01   27.93
  -1   1   9  726.20   23.12
   1  -1  -9  763.64   27.03
   1  -1  -8  162.06    9.52
  -1   1   8  180.85    7.46
   1  -1  -8  185.23   10.01
  -1   1   8  174.68   10.27
   1  -1  -8  178.19   10.55
  -1   1   8  173.31    9.88
   1  -1  -8  173.21    9.63
   1  -1  -7 9679.85  263.38
  -1   1   7 9589.05  262.06
   1  -1  -7 9999.00  262.44
  -1   1   7 9489.45  262.87
   1  -1  -7 9844.30  262.18
   1  -1  -7 9456.98  261.77
   1  -1  -6   75.71    5.40
   1  -1  -6   78.28    5.60
   1  -1  -6   87.44    6.31
  -1   1   6   87.17    6.25
   1  -1  -6   80.25    5.68
  -1   1   6   80.34    5.68
  -1   1   6   80.50    4.00
  -1   1   5  758.17   23.55
  -1   1   5  679.46   23.53
   1  -1  -5  665.38   22.84
   1  -1  -5  750.54   23.37
   1  -1  -5  690.01   23.82
   1  -1  -4  328.83   13.03
   1  -1  -4  336.99   13.55
  -1   1   4  320.25   13.36
   1  -1  -4  370.25   13.27
  -1   1   4  332.73   13.03
   1  -1  -3  660.05   22.16
  -1   1   3  607.32   21.81
  -1   1   3  658.34   21.39
  -1   1   3  674.78   21.73
  -1   1   3  684.41   19.48
   1  -1  -3  723.23   22.04
   1  -1  -3  662.10   21.47
   1  -1  -2  119.84    5.75
  -1   1   2   94.06    5.04
  -1   1   2  108.29    4.32
  -1   1   2  101.77    5.66
   1  -1  -2  100.15    5.62
   1  -1  -2  110.10    5.36
   1  -1  -2  103.51    4.28
   1  -1  -1  102.16    5.22
   1  -1  -1   88.63    4.48
  -1   1   1   79.07    4.65
  -1   1   1   82.04    4.32
   1  -1  -1   91.80    4.46
  -1   1   1   96.19    4.04
  -1   1   1   96.04    4.56
   1  -1  -1   85.03    3.90
  -1   1   0  585.02   18.92
  -1   1   0  614.61   18.59
  -1   1   0  587.45   17.93
  -1   1   0  615.54   18.14
   1  -1   0  565.60   18.31
   1  -1   0  581.02   17.89
   1  -1   0  577.43   18.07
  -1   1  -1  319.24   10.80
  -1   1  -1  309.52   10.05
  -1   1  -1  301.09   10.71
   1  -1   1  331.88   10.61
   1  -1   1  304.13   10.71
   1  -1   1  312.38   10.79
   1  -1   1  308.60   10.11
  -1   1  -1  315.83   10.54
  -1   1  -2  709.09   19.81
   1  -1   2  721.34   19.94
   1  -1   2  737.19   21.06
  -1   1  -2  640.26   20.64
  -1   1  -2  675.30   20.62
   1  -1   2  675.64   20.63
   1  -1   2  677.37   20.90
   1  -1   3  668.32   21.76
   1  -1   3  733.49   22.19
  -1   1  -3  738.42   22.39
   1  -1   3  745.89   21.03
  -1   1  -3  802.27   22.43
  -1   1  -3  712.89   20.84
  -1   1  -3  681.31   21.98
  -1   1  -4 2056.82   60.12
  -1   1  -4 2095.62   61.52
   1  -1   4 2190.55   62.07
   1  -1   4 2325.26   61.89
   1  -1   4 2185.95   61.71
   1  -1   4 2190.09   61.74
   1  -1   4 2119.22   60.14
  -1   1  -4 2190.26   61.56
  -1   1  -4 2403.95   62.40
  -1   1  -5 2096.72   60.80
   1  -1   5 2184.03   61.15
   1  -1   5 2113.43   60.93
   1  -1   5 2048.06   60.59
  -1   1  -5 2062.14   60.85
  -1   1  -5 2116.54   59.44
   1  -1   5 2044.03   61.16
   1  -1   6 1509.86   45.19
  -1   1  -6 1553.76   45.36
  -1   1  -6 1456.65   45.22
   1  -1   6 1583.58   45.85
   1  -1   6 1544.48   45.25
   1  -1   6 1603.56   45.20
  -1   1  -6 1503.27   43.64
  -1   1  -6 1523.61   44.97
  -1   1  -7 1866.48   51.04
   1  -1   7 1661.69   50.79
   1  -1   7 1648.54   51.09
   1  -1   7 1654.37   50.31
  -1   1  -7 1653.76   50.55
   1  -1   7 1792.41   51.25
  -1   1  -7 1666.60   51.04
  -1   1  -7 1786.37   49.72
  -1   1  -7 1613.17   50.55
  -1   1  -7 1637.53   50.60
  -1   1  -8  313.98   13.79
  -1   1  -8  351.26   14.00
   1  -1   8  310.55   13.82
  -1   1  -8  309.32   13.98
   1  -1   8  302.08   13.87
  -1   1  -8  335.61   14.16
   1  -1   8  316.07   13.77
   1  -1   8  301.65   13.18
  -1   1  -8  300.45   13.54
  -1   1  -9  869.70   30.95
   1  -1   9  989.77   31.75
   1  -1   9  945.06   31.56
  -1   1  -9  860.92   30.67
  -1   1  -9  912.65   31.49
   1  -1   9  870.46   30.20
  -1   1  -9 1000.26   31.26
   1  -1   9  882.84   31.34
   1  -1  10   73.28    6.37
  -1   1 -10   76.83    6.18
  -1   1 -10   84.89    6.52
  -1   1 -10   84.92    6.82
   1  -1  10   73.52    6.49
   1  -1  10   79.63    6.09
   1  -1  10   73.64    6.23
  -1   1 -10   62.42    5.85
  -1   1 -10   74.67    6.30
  -1   1 -11 2296.03   67.28
  -1   1 -11 2156.43   67.12
  -1   1 -11 2127.61   65.67
   1  -1  11 2140.79   66.94
  -1   1 -11 2134.79   66.85
   1  -1  11 2204.60   65.67
   1  -1  11 2116.56   67.05
  -1   1 -11 2344.37   67.21
   1  -1  12 1102.74   38.28
   1  -1  12 1135.25   40.19
  -1   1 -12 1127.56   39.22
  -1   1 -12 1206.03   40.10
   1  -1  12 1172.84   40.29
  -1   1 -12 1163.94   38.84
   1  -1  12 1213.49   40.26
  -1   1 -12 1167.23   40.28
  -1   1 -12 1133.24   39.94
   1  -1  13  364.01   17.90
   1  -1  13  385.84   18.72
  -1   1 -13  393.50   18.14
  -1   1 -13  373.72   18.48
  -1   1 -13  346.59   17.53
  -1   1 -13  383.34   17.39
   1  -1  13  380.57   18.64
   1  -1  13  381.73   17.19
  -1   1 -13  364.01   18.25
  -1   1 -14    2.55    1.52
   1  -1  14    5.38    2.04
   1  -1  14    3.97    1.77
   1  -1  14    0.74    1.54
  -1   1 -14    1.88    1.56
   1  -1  14   -0.29    1.17
  -1   1 -14    4.54    1.85
  -1   1 -14    3.33    1.66
  -1   1 -14    4.07    1.68
  -1   1 -15  306.48   16.61
  -1   1 -15  294.61   17.06
   1  -1  15  291.42   16.98
  -1   1 -15  326.59   17.74
  -1   1 -15  303.94   16.89
   1  -1  15  306.10   16.95
  -1   1 -15  333.81   16.53
   1  -1  15  345.30   18.21
   1  -1  15  278.26   15.21
   1  -1  16    7.21    2.47
  -1   1 -16   14.12    3.17
   1  -1  16   11.11    2.66
  -1   1 -16   12.40    3.25
   1  -1  16   11.14    3.31
  -1   1 -16    7.90    2.48
   1  -1  16   10.73    3.22
  -1   1 -17  162.65   12.00
   1  -1  17  122.13   11.06
   1  -1  17  144.01   11.48
   1  -1  17  160.76   11.06
  -1   1 -17  135.47   10.45
   1  -1  18   46.05    5.96
   1  -1  18   49.00    7.09
   1  -1  18   46.90    6.90
  -1   1 -18   48.01    6.47
  -1   1 -18   41.44    5.68
  -1   1 -19  158.02   13.08
   1  -1  19  186.96   12.64
  -1   1 -19  194.43   13.96
   1  -1  19  163.60   13.72
   1  -1  20   38.88    5.57
   1  -1  20   26.09    5.77
  -1   1 -20   38.82    6.15
  -1   1 -20   26.12    5.49
  -1   1 -21   35.60    6.10
  -1   1 -21   45.72    6.95
  -1   1 -21   50.89    7.72
   1  -1  21   45.65    6.14
   1  -1  21   41.37    6.99
   1  -1  22  120.36   10.78
  -1   1 -22  142.13   13.24
  -1   1 -22  139.06   12.66
   1  -1  22  142.76   13.59
  -1   1 -22  136.36   12.58
  -1   1 -23    9.30    3.74
   1  -1  23   10.08    3.05
  -1   1 -23   11.28    3.64
  -1   1 -23   12.03    3.69
  -1   1 -24    7.58    3.00
   1  -1  24    8.29    3.28
  -1   1 -24   11.51    4.37
  -1   1 -24    5.67    2.86
   1   0 -23  107.96   12.16
  -1   0  23  104.27   11.53
   1   0 -23   99.23   10.90
  -1   0  22   24.20    6.07
   1   0 -22   26.52    5.39
   1   0 -22   14.51    4.41
   1   0 -21  334.99   20.41
  -1   0  21  339.74   22.82
   1   0 -21  346.21   21.92
   1   0 -20   29.46    5.25
  -1   0  20   24.15    3.74
   1   0 -20   22.90    5.34
  -1   0  20   34.39    6.04
  -1   0  20   21.02    5.44
   1   0 -19  526.71   25.93
  -1   0  19  550.40   26.62
  -1   0  19  556.13   21.67
   1   0 -19  498.22   26.75
  -1   0  18   71.04    9.18
   1   0 -18   65.44    7.66
  -1   0  18   56.54    7.15
   1   0 -18   72.29    8.57
  -1   0  18   67.65    7.86
  -1   0  18   63.35    5.76
  -1   0  17    5.64    2.42
   1   0 -17   14.28    3.94
  -1   0  17   12.60    3.76
   1   0 -17   12.07    3.33
  -1   0  17   13.07    2.51
  -1   0  17   10.93    3.49
  -1   0  16  347.02   15.08
  -1   0  16  365.15   18.90
  -1   0  16  354.53   18.89
   1   0 -16  344.94   18.41
   1   0 -16  358.31   19.73
  -1   0  16  362.30   20.71
  -1   0  15   99.25    6.64
  -1   0  15  109.96    9.07
   1   0 -15   91.79    8.88
   1   0 -15   95.97    8.51
  -1   0  15   89.91    8.34
  -1   0  15   92.34    9.07
  -1   0  14  221.96   14.31
  -1   0  14  222.10   13.17
  -1   0  14  230.37   10.61
   1   0 -14  208.46   14.42
  -1   0  14  197.18   13.84
  -1   0  14  197.98   12.69
   1   0 -14  221.83   14.06
  -1   0  13  485.00   17.67
  -1   0  13  492.53   21.27
  -1   0  13  488.83   22.96
  -1   0  13  495.91   22.46
   1   0 -13  450.34   22.62
   1   0 -13  488.71   18.07
  -1   0  13  477.66   20.87
   1   0 -13  422.52   21.27
   1   0 -13  473.13   20.89
   1   0 -12   78.82    7.87
  -1   0  12   79.33    6.81
  -1   0  12   70.70    4.95
  -1   0  12   74.71    6.55
   1   0 -12   75.40    6.73
  -1   0  12   69.69    7.02
   1   0 -12   75.38    5.21
  -1   0  12   87.81    8.11
   1   0 -12   73.48    7.18
  -1   0  11  147.60   10.10
  -1   0  11  104.66    6.31
   1   0 -11  143.59    7.20
   1   0 -11  136.15    8.89
   1   0 -11  150.56   10.63
   1   0 -11  131.89    9.45
  -1   0  11  148.92    9.28
  -1   0  11  141.96    8.88
  -1   0  11  143.05   10.15
  -1   0  10   15.98    3.26
   1   0 -10   16.99    2.09
   1   0 -10   17.58    2.91
   1   0 -10   19.76    3.58
  -1   0  10   24.41    3.86
  -1   0  10   10.84    2.26
  -1   0  10   17.49    2.16
  -1   0  10   14.63    2.66
   1   0 -10   19.39    3.36
  -1   0   9 1479.57   45.56
  -1   0   9 1402.39   42.51
   1   0  -9 1500.37   42.78
   1   0  -9 1457.78   47.15
  -1   0   9 1423.82   47.13
   1   0  -9 1451.51   45.68
   1   0  -9 1653.10   49.05
  -1   0   9 1456.11   45.78
  -1   0   9 1584.32   48.33
  -1   0   8  860.82   28.73
   1   0  -8  878.12   26.45
   1   0  -8  890.71   29.19
   1   0  -8  874.04   30.99
  -1   0   8  842.17   28.89
   1   0  -8  935.74   30.84
  -1   0   8  874.59   30.53
  -1   0   8  970.21   31.49
  -1   0   8  872.57   26.29
  -1   0   7 1777.43   54.90
  -1   0   7 1855.60   57.13
  -1   0   7 1901.47   52.69
   1   0  -7 1880.92   52.81
   1   0  -7 1987.26   57.30
  -1   0   7 1828.04   55.37
   1   0  -7 1897.00   57.56
  -1   0   7 1940.98   57.17
   1   0  -7 2097.46   56.04
   1   0  -6 4139.33  111.02
   1   0  -6 4158.37  113.70
  -1   0   6 4050.91  115.08
  -1   0   6 4034.72  115.41
  -1   0   6 4254.02  113.52
   1   0  -6 3852.45  114.76
  -1   0   6 4060.49  113.62
  -1   0   6 4041.82  110.96
  -1   0   5 2209.29   58.81
   1   0  -5 2245.34   63.18
   1   0  -5 2217.11   58.89
   1   0  -5 2231.08   61.39
  -1   0   5 2170.24   61.30
  -1   0   5 2380.53   63.19
  -1   0   5 2130.68   62.86
   1   0  -4   25.23    2.63
  -1   0   4   22.07    2.59
   1   0  -4   18.35    2.05
  -1   0   4   20.97    2.44
   1   0  -4   25.52    2.78
  -1   0   4   19.30    2.07
  -1   0   3  532.56   17.96
  -1   0   3  526.63   17.97
   1   0  -3  572.45   18.14
   1   0  -3  542.31   18.15
   1   0  -3  543.92   16.89
  -1   0   3  545.73   16.90
   1   0  -2  572.65   17.83
  -1   0   2  555.10   16.83
   1   0  -2  536.54   16.78
  -1   0   2  538.67   17.72
  -1   0   1  241.09    9.46
   1   0  -1  349.04   10.23
   1   0   1   -0.05    0.14
   1   0   1    0.06    0.09
   1   0   2   99.41    4.31
   1   0   2   86.54    4.11
  -1   0  -2   87.72    4.31
  -1   0  -2   98.51    4.30
   1   0   2   95.75    3.93
  -1   0  -2   75.31    3.67
   1   0   2   87.69    4.28
  -1   0  -2   98.74    4.32
  -1   0  -3 1543.60   43.87
  -1   0  -3 1573.55   43.04
   1   0   3 1534.74   43.00
   1   0   3 1535.72   43.59
   1   0   3 1517.16   44.01
  -1   0  -3 1546.55   43.72
   1   0   3 1519.12   43.84
  -1   0  -3 1591.43   44.07
  -1   0  -4 2371.08   68.10
  -1   0  -4 2422.35   67.97
   1   0   4 2647.75   69.13
  -1   0  -4 2459.82   68.92
   1   0   4 2716.24   69.77
  -1   0  -4 2407.70   69.28
  -1   0  -4 2506.15   69.29
   1   0   4 2259.74   68.87
   1   0   4 2609.32   68.40
  -1   0  -5 2208.33   62.04
  -1   0  -5 2092.80   61.95
  -1   0  -5 2305.50   61.76
   1   0   5 2313.65   61.63
  -1   0  -5 2145.87   60.85
   1   0   5 2084.33   61.86
  -1   0  -5 2102.85   60.82
   1   0   5 2140.38   62.00
   1   0   5 2206.82   60.97
  -1   0  -6 3173.22   94.93
   1   0   6 3249.24   96.26
  -1   0  -6 3862.52   97.16
  -1   0  -6 3374.45   95.28
  -1   0  -6 3664.62   96.08
   1   0   6 3473.31   95.42
   1   0   6 3616.62   95.87
  -1   0  -6 3351.09   96.38
   1   0   7   84.74    5.50
   1   0   7   75.65    5.19
  -1   0  -7   91.13    5.63
  -1   0  -7   74.91    5.19
   1   0   7   86.84    5.44
  -1   0  -7   79.14    5.33
  -1   0  -7   94.09    6.22
   1   0   7   72.96    5.58
   1   0   7   92.77    6.12
  -1   0  -7   85.68    5.90
  -1   0  -8  553.17   20.66
  -1   0  -8  553.89   20.62
   1   0   8  531.59   19.65
  -1   0  -8  569.45   20.09
   1   0   8  541.92   19.68
   1   0   8  532.65   19.54
   1   0   8  518.44   20.39
  -1   0  -8  555.04   19.77
   1   0   8  571.83   20.84
  -1   0  -8  562.64   19.67
  -1   0  -9  111.18    7.02
   1   0   9  122.63    7.46
  -1   0  -9  122.36    7.93
   1   0   9  107.09    6.86
   1   0   9  109.78    7.58
  -1   0  -9  115.58    7.16
   1   0   9  112.35    7.75
  -1   0  -9  116.25    7.35
   1   0   9  125.52    7.53
  -1   0  -9  100.73    7.34
   1   0  10  149.52    9.58
   1   0  10  152.32    9.47
   1   0  10  165.81    9.38
  -1   0 -10  139.78    9.22
  -1   0 -10  154.50    9.30
   1   0  10  158.07    8.81
  -1   0 -10  146.75    8.60
  -1   0 -10  135.98    8.44
   1   0  10  155.35    9.13
  -1   0 -10  160.42    9.75
  -1   0 -11 1404.26   46.17
   1   0  11 1489.88   47.85
  -1   0 -11 1437.88   46.99
  -1   0 -11 1519.60   47.99
   1   0  11 1503.15   46.96
   1   0  11 1466.89   47.79
   1   0  11 1382.27   45.53
  -1   0 -11 1597.89   46.82
   1   0  11 1416.82   46.70
  -1   0 -11 1482.75   47.81
   1   0  12  381.52   18.17
  -1   0 -12  400.62   17.16
   1   0  12  404.86   16.99
  -1   0 -12  387.38   17.33
   1   0  12  418.39   19.00
  -1   0 -12  373.90   18.04
  -1   0 -12  395.40   18.36
   1   0  12  380.10   17.50
  -1   0 -12  383.66   17.82
   1   0  12  363.29   17.37
   1   0  13   46.22    4.84
  -1   0 -13   50.98    5.81
   1   0  13   39.69    5.22
  -1   0 -13   49.44    5.13
   1   0  13   38.59    4.84
  -1   0 -13   48.51    5.23
   1   0  13   46.64    5.45
   1   0  13   38.96    5.08
  -1   0 -13   50.54    5.77
   1   0  14  174.68   12.21
   1   0  14  191.47   11.28
   1   0  14  212.29   12.97
  -1   0 -14  203.15   12.86
  -1   0 -14  192.12   11.50
   1   0  14  213.36   13.24
  -1   0 -14  181.13   11.70
  -1   0 -14  216.07   13.22
   1   0  14  217.80   12.94
   1   0  15    0.69    1.42
  -1   0 -15    1.41    1.41
   1   0  15    2.86    1.87
  -1   0 -15   -0.44    1.24
   1   0  15    1.13    1.32
  -1   0 -15    1.18    0.87
   1   0  15   -0.97    1.50
  -1   0 -15    0.09    1.15
  -1   0 -16  110.28    8.82
   1   0  16  119.65   10.20
   1   0  16  116.83    8.80
  -1   0 -16  110.11    9.20
  -1   0 -16  131.47   10.56
  -1   0 -16  114.67   10.11
   1   0  16  120.25   10.33
  -1   0 -17  152.92   11.36
   1   0  17  126.57   10.70
  -1   0 -17  137.97   10.22
   1   0  17  124.98   10.90
  -1   0 -17  134.15   10.03
   1   0  17  135.76    9.99
  -1   0 -17  136.85   11.40
   1   0  17  139.18   11.68
   1   0  18  113.43   10.87
  -1   0 -18  115.82    9.70
  -1   0 -18  141.45   11.24
   1   0  18  126.76    9.81
  -1   0 -18  111.96    9.40
  -1   0 -18  132.64   11.39
  -1   0 -19  253.57   16.28
  -1   0 -19  249.41   16.54
   1   0  19  255.33   14.90
  -1   0 -20   92.15   10.02
   1   0  20   89.17    9.89
   1   0  20   88.35    8.52
  -1   0 -20   82.29    9.09
  -1   0 -21  127.46   12.13
   1   0  21  132.34   10.68
   1   0  21  119.28   12.24
  -1   0 -22   53.64    7.81
   1   0  22   56.07    6.90
  -1   0 -22   48.24    7.51
   1   0  22   69.51    9.55
   1   0  23    1.58    1.95
  -1   0 -23    0.47    2.39
   1   0  23    6.35    2.65
  -1   0 -23    4.67    3.12
   1   0  24   12.14    3.64
  -1   0 -24   15.35    4.76
  -1   0 -24   15.37    4.89
   1   0  24   11.70    4.59
   1   1 -23    7.48    3.13
  -1  -1  23   17.32    5.01
   1   1 -22  257.42   19.51
  -1  -1  22  291.55   19.42
   1   1 -22  290.88   18.20
  -1  -1  21   46.23    5.53
   1   1 -21   43.61    7.23
  -1  -1  21   62.68    8.28
   1   1 -21   52.39    7.08
   1   1 -20   85.62   10.13
  -1  -1  20   76.16    6.94
  -1  -1  20   77.48    9.01
   1   1 -20   90.45    9.04
  -1  -1  19   29.18    4.09
  -1  -1  19   35.49    5.82
   1   1 -19   31.72    6.13
  -1  -1  19   40.50    6.98
   1   1 -19   31.50    5.23
   1   1 -18   76.27    7.82
   1   1 -18   56.42    5.65
  -1  -1  18   55.62    7.80
  -1  -1  18   60.01    7.19
  -1  -1  18   57.82    7.12
  -1  -1  18   63.96    5.83
   1   1 -18   53.72    7.49
  -1  -1  17   15.34    3.44
  -1  -1  17   20.23    4.62
   1   1 -17   18.97    3.63
  -1  -1  17   17.89    3.03
   1   1 -17   12.88    3.27
   1   1 -17   19.66    3.22
  -1  -1  16  105.48    7.30
  -1  -1  16  102.17    8.83
   1   1 -16  108.46   10.14
   1   1 -16  106.44    8.84
   1   1 -16  107.74    7.70
  -1  -1  15    2.78    1.14
  -1  -1  15    0.16    1.00
   1   1 -15    2.80    1.28
  -1  -1  15    4.01    1.48
   1   1 -15    2.41    1.69
  -1  -1  15    3.90    2.06
   1   1 -15    1.78    1.06
  -1  -1  14   94.56    8.22
   1   1 -14   86.61    7.46
  -1  -1  14   83.98    6.22
   1   1 -14   88.19    8.60
   1   1 -14   98.09    9.42
  -1  -1  14  100.87    8.10
  -1  -1  14   95.45    9.14
   1   1 -14  100.98    6.81
  -1  -1  14  102.33    9.56
   1   1 -13 1702.53   52.22
  -1  -1  13 1620.98   57.51
  -1  -1  13 1693.27   54.69
  -1  -1  13 1821.04   55.93
   1   1 -13 1696.54   57.80
   1   1 -13 1793.67   55.05
  -1  -1  13 1770.58   58.69
   1   1 -13 1685.99   58.39
  -1  -1  13 1803.27   52.34
  -1  -1  12 1050.29   35.02
  -1  -1  12  995.58   37.15
   1   1 -12  970.10   36.55
   1   1 -12  979.58   37.24
   1   1 -12  971.61   33.76
  -1  -1  12  995.92   34.02
  -1  -1  12  937.90   36.53
   1   1 -12 1025.24   32.05
  -1  -1  12  980.44   31.75
  -1  -1  11  973.53   32.61
   1   1 -11  942.52   30.46
  -1  -1  11  897.44   34.63
  -1  -1  11  970.80   30.33
   1   1 -11  923.95   32.05
   1   1 -11  960.37   35.09
   1   1 -11 1001.15   35.97
  -1  -1  11  940.44   35.22
  -1  -1  11 1018.22   33.27
   1   1 -10  516.68   22.19
  -1  -1  10  525.29   20.39
  -1  -1  10  542.29   22.74
  -1  -1  10  550.43   22.71
   1   1 -10  541.40   20.15
   1   1 -10  527.67   18.66
  -1  -1  10  531.09   18.34
  -1  -1  10  553.40   20.41
   1   1 -10  549.40   23.04
   1   1  -9  254.17   13.15
  -1  -1   9  221.67   10.85
  -1  -1   9  229.62   10.69
   1   1  -9  217.38   12.13
   1   1  -9  237.81    9.69
  -1  -1   9  213.87    9.26
   1   1  -9  231.84   10.65
  -1  -1   9  221.27   12.33
   1   1  -8 2271.17   70.18
  -1  -1   8 2334.05   65.60
   1   1  -8 2417.57   65.94
  -1  -1   8 2283.32   70.08
   1   1  -8 2276.14   66.96
   1   1  -8 2223.37   69.75
  -1  -1   8 2462.03   68.04
  -1  -1   8 2271.25   67.08
   1   1  -7  799.57   25.89
  -1  -1   7  799.40   28.53
   1   1  -7  833.91   26.59
  -1  -1   7  823.96   24.93
  -1  -1   7  849.47   26.21
   1   1  -7  764.82   28.29
  -1  -1   7  856.56   26.71
   1   1  -7  837.38   25.11
   1   1  -7  895.62   29.45
  -1  -1   6 4093.04  108.18
   1   1  -6 3902.69  108.05
  -1  -1   6 4024.52  110.80
   1   1  -6 4040.98  106.73
  -1  -1   6 3845.99  106.53
  -1  -1   6 3817.74  110.48
   1   1  -6 4264.78  111.20
  -1  -1   6 3869.42  107.53
   1   1  -6 3870.31  110.47
   1   1  -6 3792.25  107.38
  -1  -1   5  247.73    9.13
  -1  -1   5  242.49    8.68
  -1  -1   5  238.21   10.79
   1   1  -5  205.82   10.19
  -1  -1   5  249.96   10.97
   1   1  -5  227.24    8.18
   1   1  -5  222.75   10.48
  -1  -1   5  225.54    8.11
   1   1  -5  232.48    9.04
   1   1  -5  246.88    8.71
  -1  -1   4  105.73    4.53
  -1  -1   4  109.38    6.19
   1   1  -4  107.90    4.34
  -1  -1   4  111.51    6.23
   1   1  -4  108.34    4.53
   1   1  -4  111.84    6.27
   1   1  -4  101.05    5.99
   1   1  -4  110.37    4.84
  -1  -1   4  108.98    4.82
  -1  -1   3    4.73    0.94
   1   1  -3    7.20    0.91
  -1  -1   3    5.10    0.66
   1   1  -3    5.91    1.21
  -1  -1   3    6.04    1.26
   1   1  -3    6.03    1.31
   1   1  -2  124.27    5.78
  -1  -1   2  114.92    5.50
   1   1  -2  128.97    5.76
   1   1  -2  119.76    4.37
  -1  -1   2  125.20    5.79
   1   1  -1  386.33   12.45
  -1  -1   1  396.23   12.73
   1   1  -1  357.85   12.57
  -1  -1   1  416.53   12.62
   1   1  -1  378.29   12.59
  -1  -1   1  424.96   12.92
   1   1   0 1543.60   15.02
  -1  -1   0 1518.79   13.30
  -1  -1  -1 1867.43   50.69
   1   1   3  588.65   17.04
  -1  -1  -3  610.99   17.12
  -1  -1  -3  583.58   18.91
   1   1   3  578.33   18.51
  -1  -1  -3  580.68   16.91
  -1  -1  -3  573.34   18.39
   1   1   3  602.26   16.93
   1   1   3  640.04   18.65
   1   1   3  553.49   18.79
  -1  -1  -4 1008.13   28.30
   1   1   4  979.39   30.05
  -1  -1  -4 1037.37   30.25
  -1  -1  -4 1038.62   28.73
   1   1   4  990.70   30.52
  -1  -1  -4 1018.44   31.03
  -1  -1  -4  979.71   28.87
   1   1   4 1088.61   28.54
   1   1   4  981.84   28.81
   1   1   4 1002.37   30.93
   1   1   4 1006.63   28.66
   1   1   5   59.28    4.48
  -1  -1  -5   63.54    4.65
  -1  -1  -5   70.33    3.59
   1   1   5   59.05    3.32
  -1  -1  -5   65.94    3.76
  -1  -1  -5   62.19    4.13
   1   1   5   64.73    3.69
   1   1   5   63.87    4.10
  -1  -1  -5   60.56    3.31
   1   1   5   73.53    4.82
   1   1   6 1088.75   32.28
  -1  -1  -6  983.02   30.36
   1   1   6 1040.87   31.10
   1   1   6  968.95   30.23
  -1  -1  -6 1011.87   32.23
  -1  -1  -6 1024.74   31.06
   1   1   6 1017.61   29.82
  -1  -1  -6  953.49   29.48
   1   1   6 1039.03   32.30
  -1  -1  -6 1005.22   29.65
  -1  -1  -7  529.82   19.98
  -1  -1  -7  566.18   17.94
   1   1   7  556.48   19.90
   1   1   7  524.92   18.36
   1   1   7  524.82   18.65
  -1  -1  -7  536.17   18.62
   1   1   7  525.47   17.86
  -1  -1  -7  519.98   17.69
   1   1   7  527.15   19.91
  -1  -1  -7  535.21   18.74
   1   1   8   38.15    4.06
  -1  -1  -8   50.23    4.20
   1   1   8   34.56    3.31
  -1  -1  -8   31.40    3.36
   1   1   8   38.58    4.25
   1   1   8   48.84    4.10
  -1  -1  -8   39.18    3.32
   1   1   8   38.43    3.68
  -1  -1  -8   36.22    4.18
  -1  -1  -8   32.48    3.22
   1   1   9 1488.86   46.69
   1   1   9 1479.02   44.93
   1   1   9 1440.53   46.03
   1   1   9 1413.04   44.48
  -1  -1  -9 1437.32   44.12
   1   1   9 1438.21   44.11
  -1  -1  -9 1562.12   45.54
  -1  -1  -9 1561.56   45.17
  -1  -1  -9 1379.04   43.40
   1   1  10 1161.42   37.33
  -1  -1 -10 1186.61   37.70
   1   1  10 1247.02   39.72
   1   1  10 1150.34   37.47
  -1  -1 -10 1196.67   36.91
  -1  -1 -10 1207.96   38.50
   1   1  10 1217.64   38.33
  -1  -1 -10 1096.13   36.78
  -1  -1 -10 1185.78   39.73
   1   1  10 1156.85   39.51
  -1  -1 -11  470.42   18.96
  -1  -1 -11  424.79   17.91
  -1  -1 -11  508.12   20.20
   1   1  11  478.61   19.59
   1   1  11  520.70   21.36
   1   1  11  469.86   20.42
   1   1  11  496.30   19.22
  -1  -1 -11  477.96   18.80
  -1  -1 -11  536.52   21.63
   1   1  12  527.91   21.94
  -1  -1 -12  492.23   19.78
   1   1  12  495.33   19.97
  -1  -1 -12  474.08   19.55
  -1  -1 -12  464.63   21.23
  -1  -1 -12  536.11   19.82
  -1  -1 -12  475.85   20.64
   1   1  12  467.86   19.36
   1   1  12  456.08   21.15
   1   1  13  459.05   19.56
  -1  -1 -13  448.76   18.84
   1   1  13  445.77   20.89
  -1  -1 -13  464.21   19.52
  -1  -1 -13  451.91   21.14
   1   1  13  479.79   21.76
   1   1  13  450.53   19.03
   1   1  13  509.77   21.07
  -1  -1 -13  460.32   19.31
  -1  -1 -13  428.33   20.18
   1   1  14   11.08    3.00
   1   1  14   14.79    2.67
   1   1  14    9.24    2.63
  -1  -1 -14   18.86    3.35
  -1  -1 -14   17.17    3.21
  -1  -1 -14   11.69    2.46
   1   1  14   11.53    2.89
  -1  -1 -14   11.44    2.95
   1   1  14   13.05    2.60
  -1  -1 -14   11.24    3.11
  -1  -1 -15   28.72    4.19
   1   1  15   36.08    5.38
  -1  -1 -15   33.04    4.49
   1   1  15   39.29    5.74
  -1  -1 -15   36.78    4.74
   1   1  15   29.27    4.55
  -1  -1 -15   36.07    5.58
  -1  -1 -15   28.91    4.66
   1   1  15   36.60    4.90
   1   1  15   38.81    4.70
  -1  -1 -16  222.49   13.04
  -1  -1 -16  201.14   13.91
  -1  -1 -16  225.59   13.06
   1   1  16  226.58   14.86
   1   1  16  218.75   13.56
   1   1  16  212.26   14.60
  -1  -1 -16  213.83   13.20
  -1  -1 -16  212.23   14.40
   1   1  16  208.12   12.42
  -1  -1 -17  496.38   22.74
  -1  -1 -17  497.89   22.15
   1   1  17  520.96   25.12
  -1  -1 -17  475.56   24.30
   1   1  17  487.20   23.80
  -1  -1 -17  512.08   22.46
   1   1  17  415.21   23.28
   1   1  17  557.13   22.69
   1   1  17  474.19   22.92
   1   1  18  446.63   22.71
  -1  -1 -18  422.19   21.35
   1   1  18  509.87   21.95
  -1  -1 -18  477.30   22.75
   1   1  18  494.47   24.88
  -1  -1 -18  481.12   24.80
  -1  -1 -19    5.04    2.48
   1   1  19    5.78    2.18
   1   1  19    5.28    2.27
   1   1  19    7.21    2.82
  -1  -1 -19   10.34    2.75
  -1  -1 -20  145.30   11.99
   1   1  20  145.85   11.09
   1   1  20  158.30   13.26
   1   1  20  157.65   13.57
  -1  -1 -20  144.28   13.07
  -1  -1 -21    1.37    1.34
   1   1  21   -0.56    1.60
   1   1  21    2.47    1.83
  -1  -1 -21    1.83    1.40
   1   1  22  187.10   13.29
  -1  -1 -22  201.42   15.15
   1   1  22  199.93   16.64
  -1  -1 -22  193.26   16.04
  -1  -1 -23  157.45   13.72
   1   1  23  170.21   12.69
  -1  -1 -23  159.23   14.75
  -1  -1 -24   81.87    9.78
  -1  -1 -24   98.81   11.54
   1   1  24   80.96    8.96
  -1  -2  23   66.35    9.09
   1   2 -23   46.33    8.24
   1   2 -23   69.96    9.94
  -1  -2  22  511.69   26.99
   1   2 -22  435.52   26.87
   1   2 -22  462.47   27.74
   1   2 -21   59.12    7.12
  -1  -2  21   62.42    8.28
   1   2 -21   50.00    8.03
  -1  -2  21   49.07    5.83
   1   2 -20  141.97   13.51
   1   2 -20  127.60   10.48
   1   2 -19   14.02    4.00
   1   2 -19   11.85    2.98
  -1  -2  19    8.68    2.40
   1   2 -18  299.53   15.67
   1   2 -18  317.16   20.31
  -1  -2  18  312.84   17.38
  -1  -2  18  332.91   16.01
   1   2 -18  341.30   17.46
  -1  -2  18  361.32   19.65
   1   2 -17   56.19    5.76
   1   2 -17   58.82    6.19
  -1  -2  17   58.66    6.59
  -1  -2  17   74.72    7.82
   1   2 -17   59.73    8.00
  -1  -2  17   70.54    6.32
   1   2 -16  256.27   16.70
   1   2 -16  257.04   13.90
  -1  -2  16  249.08   14.12
   1   2 -16  235.92   12.72
  -1  -2  16  240.12   12.64
  -1  -2  16  252.61   15.08
   1   2 -15  219.34   12.34
  -1  -2  15  225.05   13.58
   1   2 -15  216.76   11.76
   1   2 -15  208.48   14.68
  -1  -2  15  209.25   12.42
  -1  -2  15  212.39   11.37
  -1  -2  14  168.15    9.46
   1   2 -14  142.47    9.30
  -1  -2  14  164.18   10.11
   1   2 -14  136.62    8.74
   1   2 -14  151.87   11.90
  -1  -2  14  150.48   12.14
  -1  -2  14  142.72   10.25
  -1  -2  13  158.38    9.59
   1   2 -13  139.03   11.07
   1   2 -13  156.58   11.93
   1   2 -13  146.56    9.17
  -1  -2  13  165.52   10.60
  -1  -2  13  154.26    8.83
   1   2 -13  169.56    9.39
   1   2 -13  141.74    9.86
  -1  -2  12 1545.97   49.46
   1   2 -12 1526.74   47.33
   1   2 -12 1456.51   52.16
  -1  -2  12 1591.36   48.15
  -1  -2  12 1629.58   53.16
  -1  -2  12 1510.46   52.47
   1   2 -12 1568.15   52.37
  -1  -2  12 1505.52   46.79
   1   2 -12 1471.33   47.32
   1   2 -12 1549.92   49.33
  -1  -2  11  227.58   12.00
  -1  -2  11  219.18   10.63
  -1  -2  11  234.42   14.17
   1   2 -11  234.21   11.01
   1   2 -11  224.97   13.65
   1   2 -11  247.97   11.35
  -1  -2  11  237.11   11.41
  -1  -2  11  223.12   13.70
   1   2 -11  219.07   13.63
   1   2 -11  223.57   11.84
   1   2 -10    5.89    2.12
  -1  -2  10    1.42    0.77
  -1  -2  10    6.81    1.65
  -1  -2  10    4.08    1.28
   1   2 -10    3.93    1.05
  -1  -2  10    2.69    1.47
  -1  -2  10    5.26    2.06
   1   2 -10    4.70    1.34
   1   2 -10    5.88    2.15
   1   2 -10    5.88    1.61
   1   2  -9  290.84   14.92
   1   2  -9  278.26   11.91
  -1  -2   9  272.35   12.75
   1   2  -9  297.75   14.95
  -1  -2   9  318.90   15.60
  -1  -2   9  293.56   12.02
  -1  -2   9  297.31   15.03
   1   2  -9  284.12   11.82
  -1  -2   9  283.50   12.01
   1   2  -9  335.76   13.60
  -1  -2   8 1569.95   49.45
   1   2  -8 1518.21   46.42
   1   2  -8 1542.98   45.05
  -1  -2   8 1561.52   46.70
  -1  -2   8 1568.05   49.71
   1   2  -8 1530.03   45.55
   1   2  -8 1648.68   49.93
   1   2  -8 1567.04   49.45
  -1  -2   8 1563.66   45.23
  -1  -2   8 1450.65   45.30
  -1  -2   7 1136.63   35.92
   1   2  -7 1249.82   39.81
  -1  -2   7 1201.63   39.71
  -1  -2   7 1276.98   37.23
   1   2  -7 1233.63   36.95
   1   2  -7 1174.09   39.31
  -1  -2   7 1198.31   39.36
   1   2  -7 1173.11   35.26
   1   2  -7 1205.07   36.24
  -1  -2   7 1245.30   35.74
  -1  -2   6  254.16   10.07
  -1  -2   6  269.26    9.53
  -1  -2   6  279.29   12.72
   1   2  -6  260.41   10.40
   1   2  -6  274.35   10.21
  -1  -2   6  257.44   10.44
   1   2  -6  254.08    9.25
   1   2  -6  248.87   12.17
   1   2  -5  776.25   24.13
  -1  -2   5  799.32   22.90
   1   2  -5  775.97   22.60
   1   2  -5  769.56   26.38
  -1  -2   5  872.01   27.27
  -1  -2   5  778.40   24.22
  -1  -2   5  825.34   24.25
   1   2  -5  800.85   23.99
   1   2  -4  981.63   30.48
  -1  -2   4  931.92   28.20
   1   2  -4  957.80   30.24
   1   2  -4  995.41   28.20
  -1  -2   4  967.70   28.10
  -1  -2   4  985.92   26.63
   1   2  -4  983.14   28.16
   1   2  -4  934.23   30.16
   1   2  -3 2607.96   69.08
   1   2  -3 2401.70   70.62
  -1  -2   3 2435.16   69.04
  -1  -2   3 2503.94   70.88
   1   2  -3 2484.74   68.54
   1   2  -3 2421.93   70.60
  -1  -2   3 2572.93   68.71
  -1  -2   2  943.49   26.83
  -1  -2   2  880.31   25.97
   1   2  -2  888.22   27.57
   1   2  -2  875.95   26.01
  -1  -2   2  971.31   28.03
   1   2  -2  883.83   26.55
  -1  -2   2  906.10   27.83
  -1  -2   2  874.47   28.05
   1   2  -1   13.52    1.81
  -1  -2   1   17.21    1.86
  -1  -2   1   11.73    1.72
   1   2  -1   17.32    2.11
   1   2  -1   19.82    1.41
  -1  -2   1   16.20    1.30
   1   2  -1   17.59    1.85
  -1  -2   1   19.15    1.65
   1   2  -1   13.86    1.42
   1   2  -1   16.36    1.73
  -1  -2   0   48.11    3.46
   1   2   0   37.60    2.87
   1   2   0   45.21    2.68
   1   2   0   45.28    2.59
   1   2   0   37.66    2.51
  -1  -2   0   35.91    2.36
   1   2   0   42.62    3.25
  -1  -2   0   37.64    2.84
  -1  -2   0   37.95    2.57
   1   2   1  240.31    8.58
  -1  -2  -1  229.12    7.58
   1   2   1  219.13    8.47
  -1  -2  -1  234.79    9.27
   1   2   1  222.93    9.14
   1   2   1  219.04    7.48
  -1  -2  -1  225.56    8.46
  -1  -2  -1  215.44    8.50
   1   2   2   52.58    3.72
   1   2   2   51.92    3.49
  -1  -2  -2   51.45    3.60
   1   2   2   52.69    3.22
  -1  -2  -2   50.35    3.18
  -1  -2  -2   50.55    3.45
   1   2   3 1127.64   33.92
  -1  -2  -3 1195.21   35.50
   1   2   3 1189.59   33.59
  -1  -2  -3 1156.56   33.57
   1   2   3 1200.34   35.51
   1   2   3 1192.55   35.52
  -1  -2  -3 1220.67   34.28
  -1  -2  -4  772.74   22.55
  -1  -2  -4  774.55   22.21
   1   2   4  769.64   22.13
   1   2   4  741.26   22.31
   1   2   4  767.45   24.30
  -1  -2  -5 1211.32   36.12
  -1  -2  -5 1271.27   36.37
   1   2   5 1236.65   36.09
  -1  -2  -5 1221.48   38.34
   1   2   5 1252.70   36.14
  -1  -2  -5 1275.62   34.50
   1   2   6  570.53   19.49
   1   2   6  505.66   18.26
  -1  -2  -6  584.69   21.03
  -1  -2  -6  569.63   17.38
   1   2   6  608.54   21.26
  -1  -2  -6  578.44   19.04
   1   2   6  585.21   18.97
  -1  -2  -6  553.91   18.76
   1   2   7 2315.17   63.68
  -1  -2  -7 2369.70   63.61
   1   2   7 2241.02   61.96
   1   2   7 2194.70   63.88
  -1  -2  -7 2245.54   61.88
  -1  -2  -7 2317.92   63.93
   1   2   7 2369.11   66.43
  -1  -2  -7 2178.34   65.81
   1   2   8  181.45    9.88
  -1  -2  -8  164.68    7.58
   1   2   8  165.43    7.59
   1   2   8  151.28    8.39
  -1  -2  -8  155.58    9.69
   1   2   8  166.37    9.99
   1   2   8  166.63    8.58
  -1  -2  -8  178.39    8.90
  -1  -2  -8  169.19    8.32
   1   2   9   44.69    4.31
  -1  -2  -9   33.63    4.42
  -1  -2  -9   40.76    4.18
  -1  -2  -9   40.86    3.58
   1   2   9   44.48    4.99
   1   2   9   43.45    3.69
   1   2   9   44.93    4.29
   1   2   9   36.43    4.32
  -1  -2  -9   39.44    3.79
  -1  -2 -10 1332.22   46.44
   1   2  10 1497.35   45.01
  -1  -2 -10 1405.83   44.89
  -1  -2 -10 1436.33   43.81
   1   2  10 1464.48   43.19
  -1  -2 -10 1405.96   42.88
   1   2  10 1430.53   46.17
   1   2  10 1349.99   46.55
   1   2  10 1378.10   43.99
   1   2  11   47.26    5.58
   1   2  11   43.80    4.31
   1   2  11   52.03    5.22
   1   2  11   40.41    4.33
  -1  -2 -11   40.96    4.06
  -1  -2 -11   56.02    4.91
   1   2  11   43.97    5.20
  -1  -2 -11   43.45    4.90
   1   2  12 2512.73   71.84
  -1  -2 -12 2517.22   76.17
   1   2  12 2322.00   71.80
  -1  -2 -12 2533.63   72.40
   1   2  12 2308.47   74.32
  -1  -2 -12 2330.87   73.53
  -1  -2 -12 2371.09   71.30
   1   2  12 2328.08   72.96
  -1  -2 -13  434.13   18.54
   1   2  13  445.73   21.04
  -1  -2 -13  455.32   20.61
  -1  -2 -13  459.29   21.82
   1   2  13  455.41   18.98
   1   2  13  442.22   19.94
   1   2  13  483.97   22.22
   1   2  13  462.95   19.29
  -1  -2 -13  450.68   19.08
   1   2  14   54.27    6.05
   1   2  14   63.83    7.12
   1   2  14   58.92    5.82
   1   2  14   54.70    5.54
  -1  -2 -14   46.70    5.18
  -1  -2 -14   41.75    5.51
  -1  -2 -14   54.92    5.50
   1   2  14   54.27    6.85
  -1  -2 -14   56.58    6.96
   1   2  15  934.62   33.13
   1   2  15  886.72   35.57
  -1  -2 -15  870.63   32.44
   1   2  15  868.92   32.76
  -1  -2 -15  890.07   34.96
   1   2  15  918.67   36.87
   1   2  15  959.85   35.24
  -1  -2 -15  940.31   36.79
  -1  -2 -15  896.37   32.99
   1   2  16  263.76   15.53
   1   2  16  209.32   14.63
   1   2  16  243.81   13.49
   1   2  16  250.86   14.09
   1   2  16  217.44   15.42
  -1  -2 -16  226.84   13.29
  -1  -2 -16  261.24   16.39
  -1  -2 -16  230.62   13.72
  -1  -2 -16  243.54   15.26
  -1  -2 -17  406.11   20.19
  -1  -2 -17  422.32   22.29
   1   2  17  494.83   24.06
   1   2  17  439.96   20.08
   1   2  17  403.81   20.25
  -1  -2 -17  447.98   23.59
  -1  -2 -17  454.21   20.76
   1   2  18   62.41    8.07
  -1  -2 -18   63.36    8.06
   1   2  18   64.41    6.75
   1   2  18   63.55    7.34
   1   2  18   72.77    8.13
  -1  -2 -18   58.21    6.80
   1   2  19  349.31   17.91
  -1  -2 -19  320.32   17.85
   1   2  19  331.26   19.77
  -1  -2 -19  336.93   20.87
   1   2  19  355.01   21.08
   1   2  19  298.03   17.72
  -1  -2 -20  122.76   10.55
   1   2  20  126.86   10.16
  -1  -2 -20  109.25   11.76
   1   2  20  118.79   11.98
   1   2  21  136.42   13.21
   1   2  21  136.12   12.78
   1   2  21  123.92   10.28
  -1  -2 -21  148.54   13.91
  -1  -2 -21  131.50   11.32
   1   2  22   57.91    8.47
   1   2  22   47.40    7.90
  -1  -2 -22   58.92    8.95
   1   2  22   54.51    6.83
  -1  -2 -22   48.59    6.88
  -1  -2 -23  339.86   22.87
  -1  -2 -23  314.16   19.48
   1   2  23  330.45   21.86
   1   2  23  344.08   22.88
   1   2  23  306.07   18.01
   1   2  24   40.95    7.84
  -1  -2 -24   39.71    7.63
  -1  -2 -24   43.70    7.22
  -1  -3  23    3.45    1.67
   1   3 -23   10.81    4.42
   1   3 -22  323.00   22.47
   1   3 -22  305.47   22.32
  -1  -3  22  294.86   19.90
   1   3 -21  149.05   14.57
   1   3 -21  150.58   15.08
  -1  -3  21  164.13   14.00
  -1  -3  21  157.83   11.58
  -1  -3  20  727.90   29.53
  -1  -3  20  744.62   33.57
   1   3 -20  752.86   36.45
   1   3 -20  724.12   35.31
   1   3 -19  165.60   14.22
   1   3 -19  142.88   13.81
  -1  -3  19  150.61   12.56
   1   3 -19  152.36   10.86
  -1  -3  19  146.73   10.64
  -1  -3  18  106.38    8.62
   1   3 -18  115.46   11.56
   1   3 -18   91.16    8.16
  -1  -3  18  107.66   10.23
  -1  -3  18   90.66    8.34
   1   3 -18  109.54    8.77
   1   3 -18   99.98   11.05
  -1  -3  17  259.78   14.52
   1   3 -17  229.73   13.72
   1   3 -17  263.31   17.60
  -1  -3  17  248.76   15.84
  -1  -3  17  268.13   14.28
   1   3 -17  251.22   17.62
   1   3 -17  244.15   13.61
   1   3 -16 1080.48   43.19
   1   3 -16 1073.38   42.39
  -1  -3  16 1149.97   38.01
  -1  -3  16 1059.86   37.60
   1   3 -16 1040.63   39.73
  -1  -3  16 1067.45   39.98
   1   3 -16 1136.91   37.46
  -1  -3  15  450.12   19.43
  -1  -3  15  428.70   20.92
   1   3 -15  437.07   22.84
   1   3 -15  409.00   20.40
   1   3 -15  467.08   23.99
   1   3 -15  465.30   19.92
  -1  -3  15  465.41   19.68
   1   3 -15  432.71   18.76
   1   3 -14  379.79   20.49
   1   3 -14  384.39   18.84
   1   3 -14  410.37   17.24
  -1  -3  14  383.31   18.97
   1   3 -14  406.59   17.93
   1   3 -14  394.28   21.22
  -1  -3  14  395.53   17.48
  -1  -3  14  401.79   17.64
  -1  -3  13  305.85   14.17
   1   3 -13  301.49   15.46
   1   3 -13  307.78   14.54
   1   3 -13  281.90   16.77
   1   3 -13  316.00   13.96
  -1  -3  13  285.36   17.67
   1   3 -13  296.35   17.53
  -1  -3  13  307.00   14.42
  -1  -3  13  307.97   15.80
  -1  -3  12 1620.67   54.03
  -1  -3  12 1455.27   47.68
  -1  -3  12 1559.83   47.50
   1   3 -12 1550.39   49.43
   1   3 -12 1632.34   53.47
   1   3 -12 1576.15   48.19
   1   3 -12 1480.44   52.49
  -1  -3  12 1436.48   49.12
   1   3 -12 1540.59   47.00
   1   3 -12 1446.19   51.52
   1   3 -11  382.74   19.09
  -1  -3  11  410.61   17.87
   1   3 -11  423.56   17.93
   1   3 -11  398.61   16.64
  -1  -3  11  395.43   16.00
  -1  -3  11  389.97   20.09
   1   3 -11  386.19   19.67
  -1  -3  11  402.65   16.77
   1   3 -11  396.20   19.91
  -1  -3  10   32.55    3.71
   1   3 -10   32.72    4.68
   1   3 -10   39.55    5.25
   1   3 -10   32.72    3.78
  -1  -3  10   32.88    5.01
  -1  -3  10   27.46    3.65
   1   3 -10   32.64    4.62
   1   3 -10   35.73    4.18
  -1  -3  10   32.73    3.44
  -1  -3   9   18.50    2.37
   1   3  -9   19.17    2.81
  -1  -3   9   11.19    2.66
   1   3  -9   17.93    2.50
  -1  -3   9   14.35    2.53
   1   3  -9   11.34    2.74
   1   3  -9   10.41    2.59
   1   3  -9   13.68    2.94
  -1  -3   9   14.83    2.65
   1   3  -8  581.47   24.79
  -1  -3   8  645.83   23.12
   1   3  -8  679.94   23.26
  -1  -3   8  621.02   20.95
   1   3  -8  619.48   24.76
  -1  -3   8  654.63   25.79
   1   3  -8  675.97   22.69
   1   3  -8  620.47   25.11
  -1  -3   8  654.67   22.73
   1   3  -7   10.39    2.03
  -1  -3   7   10.61    1.81
  -1  -3   7    8.63    1.77
   1   3  -7    6.77    1.88
   1   3  -7    7.59    1.77
   1   3  -7   10.50    2.42
  -1  -3   7   15.84    2.79
  -1  -3   7   11.57    1.60
   1   3  -7    5.32    1.77
  -1  -3   6  228.57   10.19
   1   3  -6  203.63   11.00
   1   3  -6  199.25    9.57
   1   3  -6  224.08    9.93
   1   3  -6  214.24   11.47
  -1  -3   6  230.94   11.97
  -1  -3   6  225.41    8.59
  -1  -3   6  195.43    9.59
   1   3  -5  604.12   22.60
   1   3  -5  633.05   22.90
   1   3  -5  637.93   21.01
   1   3  -5  583.18   22.58
  -1  -3   5  608.17   22.97
  -1  -3   5  630.03   19.12
  -1  -3   5  634.50   21.27
  -1  -3   5  616.72   20.89
   1   3  -5  609.90   20.78
   1   3  -4 7924.09  220.11
  -1  -3   4 7610.44  220.49
  -1  -3   4 7693.54  222.92
   1   3  -4 8305.98  222.56
  -1  -3   4 7911.66  222.56
   1   3  -4 7538.64  220.14
  -1  -3   4 8439.95  220.50
   1   3  -4 8357.37  222.66
  -1  -3   4 7944.53  222.29
   1   3  -3  861.66   29.07
   1   3  -3  923.26   28.03
  -1  -3   3  908.34   29.24
  -1  -3   3  925.02   30.04
   1   3  -3  996.62   29.55
  -1  -3   3  859.10   27.35
  -1  -3   3  886.60   29.27
   1   3  -3  900.92   27.50
  -1  -3   3  798.20   27.59
   1   3  -2  786.07   24.53
  -1  -3   2  726.66   24.34
  -1  -3   2  770.66   25.44
   1   3  -2  773.08   23.95
  -1  -3   2  794.92   24.12
   1   3  -2  741.79   24.80
  -1  -3   2  785.16   22.99
   1   3  -2  779.00   25.85
  -1  -3   2  776.82   26.02
  -1  -3   1   11.47    1.79
  -1  -3   1   15.37    1.72
   1   3  -1   12.24    1.69
   1   3  -1   11.77    1.91
  -1  -3   1   14.12    2.29
   1   3  -1   10.98    1.76
   1   3  -1   14.18    1.93
   1   3  -1   12.64    2.02
  -1  -3   1   13.85    1.85
  -1  -3   1   13.66    1.99
  -1  -3   0   13.87    1.84
   1   3   0   12.39    2.07
   1   3   0   14.29    2.00
   1   3   0   16.19    2.03
  -1  -3   0   14.64    1.82
  -1  -3   0   12.68    2.11
   1   3   0   13.27    1.75
   1   3   0   17.29    2.33
   1   3   0   14.86    1.83
  -1  -3  -1  778.81   25.55
  -1  -3  -1  787.00   24.61
  -1  -3  -1  778.93   23.50
   1   3   1  776.15   24.90
   1   3   1  815.22   23.60
   1   3   1  778.91   24.52
   1   3   2 2597.48   70.48
  -1  -3  -2 2467.71   68.13
   1   3   2 2466.53   70.51
   1   3   2 2432.96   69.79
  -1  -3  -2 2477.93   70.32
   1   3   2 2480.77   71.25
   1   3   2 2484.41   68.11
  -1  -3  -2 2515.92   70.64
  -1  -3  -3   14.26    2.00
  -1  -3  -3   12.42    1.28
   1   3   3   13.18    1.99
   1   3   3   12.20    1.82
  -1  -3  -3    9.79    1.91
  -1  -3  -3    6.04    1.43
   1   3   3   13.55    2.07
   1   3   3   13.07    2.09
  -1  -3  -4 6145.64  166.03
  -1  -3  -4 6051.11  165.53
   1   3   4 6399.30  167.51
  -1  -3  -4 6062.23  167.46
   1   3   4 6207.19  167.58
   1   3   4 6072.38  165.35
   1   3   4 5852.96  165.56
   1   3   5  402.65   14.63
  -1  -3  -5  377.44   16.12
   1   3   5  418.54   16.59
  -1  -3  -5  384.40   14.66
  -1  -3  -5  390.10   14.83
   1   3   5  390.78   14.75
   1   3   6 1062.79   35.52
  -1  -3  -6 1098.81   33.53
   1   3   6 1038.61   32.96
   1   3   6 1087.15   33.20
  -1  -3  -6 1057.39   30.63
  -1  -3  -6 1057.20   33.22
  -1  -3  -6 1010.69   35.08
  -1  -3  -7   63.56    5.10
  -1  -3  -7   67.10    5.17
  -1  -3  -7   55.34    5.55
   1   3   7   70.78    5.23
   1   3   7   69.23    5.12
   1   3   7   57.03    5.66
  -1  -3  -7   65.74    3.93
   1   3   8   58.82    5.09
  -1  -3  -8   65.32    5.24
   1   3   8   66.66    6.33
  -1  -3  -8   69.16    5.47
   1   3   8   69.88    5.47
   1   3   8   67.52    5.21
  -1  -3  -8   70.37    6.51
   1   3   9  111.79    8.74
  -1  -3  -9  118.33    6.50
   1   3   9  118.37    7.72
  -1  -3  -9  133.63    8.00
   1   3   9  114.22    7.61
   1   3   9  117.06    7.50
  -1  -3  -9  116.54    8.90
  -1  -3  -9  127.52    8.10
   1   3  10  772.10   30.58
  -1  -3 -10  758.79   25.88
  -1  -3 -10  817.87   28.16
  -1  -3 -10  815.56   28.87
   1   3  10  806.50   28.22
  -1  -3 -10  796.15   30.74
   1   3  10  850.52   28.68
   1   3  11  272.21   13.31
  -1  -3 -11  246.14   13.15
  -1  -3 -11  257.67   12.72
   1   3  11  248.05   14.62
  -1  -3 -11  223.99   10.91
  -1  -3 -11  264.07   14.89
   1   3  11  241.85   12.45
  -1  -3 -12   57.36    6.14
   1   3  12   66.67    6.83
   1   3  12   58.59    5.88
  -1  -3 -12   58.87    5.58
   1   3  12   64.62    7.13
   1   3  12   61.80    5.75
  -1  -3 -12   55.47    4.99
  -1  -3 -12   69.19    7.31
  -1  -3 -13    6.88    2.44
   1   3  13    6.24    1.85
   1   3  13    6.38    1.83
   1   3  13    4.02    2.51
  -1  -3 -13    4.92    1.51
  -1  -3 -13    6.32    2.22
  -1  -3 -13    6.87    2.28
   1   3  13    7.52    2.24
  -1  -3 -14  592.93   25.60
   1   3  14  594.77   26.35
   1   3  14  568.66   24.60
  -1  -3 -14  551.77   23.72
   1   3  14  603.30   27.39
  -1  -3 -14  666.12   28.31
   1   3  14  567.63   23.42
  -1  -3 -14  590.45   22.79
   1   3  15   43.17    6.68
   1   3  15   62.04    7.34
  -1  -3 -15   44.69    5.00
  -1  -3 -15   47.52    6.19
   1   3  15   40.59    5.47
   1   3  15   38.74    4.93
  -1  -3 -15   53.32    5.92
  -1  -3 -16  345.06   18.46
   1   3  16  424.45   20.83
  -1  -3 -16  422.54   22.68
  -1  -3 -16  383.66   20.80
   1   3  16  405.99   19.02
  -1  -3 -16  423.83   18.78
   1   3  16  382.54   21.06
   1   3  17   74.16    8.08
   1   3  17   79.36    7.45
  -1  -3 -17   79.72    9.21
  -1  -3 -17   66.98    7.29
   1   3  17   74.16    8.57
  -1  -3 -17   73.44    7.01
   1   3  18  117.81    9.40
   1   3  18  115.51   11.18
   1   3  18  120.00   10.81
  -1  -3 -18  107.59    9.06
  -1  -3 -19   13.51    3.64
   1   3  19   11.17    3.66
   1   3  19    6.21    2.63
   1   3  19   11.31    3.06
  -1  -3 -19    6.30    2.69
   1   3  20   89.25   10.47
   1   3  20   84.98    8.25
  -1  -3 -20   84.38    8.46
  -1  -3 -20   90.58   10.76
  -1  -3 -21   92.49   11.03
  -1  -3 -21   73.65    8.08
   1   3  21   99.96   10.57
   1   3  21   91.57   10.95
   1   3  21   91.80    8.67
  -1  -3 -22   20.79    5.61
   1   3  22   14.32    4.49
   1   3  22   16.42    4.94
   1   3  22   12.12    3.35
  -1  -3 -22   15.64    3.72
   1   3  23  141.35   14.09
  -1  -3 -23  135.82   14.39
  -1  -3 -23  117.26   10.98
   1   3  23  121.37   10.59
   1   3  24  209.89   18.33
  -1  -3 -24  215.75   18.69
  -1  -4  22   25.49    5.82
   1   4 -22   24.20    6.42
   1   4 -21  123.61   13.30
  -1  -4  21  143.81   13.14
  -1  -4  21  151.45   11.56
   1   4 -21  139.40   14.58
  -1  -4  20    4.55    2.49
   1   4 -20    4.39    2.52
  -1  -4  20    5.24    2.68
  -1  -4  19  164.58   11.79
   1   4 -19  137.13   13.26
  -1  -4  19  157.35   12.92
   1   4 -19  136.55   13.66
  -1  -4  18  120.65    9.85
   1   4 -18  111.69   11.50
  -1  -4  18  122.20   11.04
   1   4 -18  146.70   13.76
   1   4 -17  333.41   20.92
   1   4 -17  360.65   22.01
  -1  -4  17  312.07   16.36
   1   4 -17  301.99   16.91
  -1  -4  17  362.15   19.73
  -1  -4  17  336.33   17.57
  -1  -4  16  191.79   11.57
   1   4 -16  187.80   13.33
  -1  -4  16  200.33   12.54
   1   4 -16  211.63   15.88
   1   4 -16  194.79   12.53
  -1  -4  16  212.85   14.17
   1   4 -16  215.65   15.73
  -1  -4  15  296.23   14.82
   1   4 -15  295.29   16.53
   1   4 -15  293.26   18.39
   1   4 -15  311.67   16.06
   1   4 -15  295.21   18.99
  -1  -4  15  312.43   16.01
  -1  -4  15  303.81   17.01
  -1  -4  14  135.95    9.48
  -1  -4  14  122.56    9.73
  -1  -4  14  120.15    8.23
   1   4 -14  113.16    8.76
   1   4 -14  132.55   11.24
   1   4 -14  113.13   10.94
   1   4 -14  112.15    9.24
  -1  -4  13  739.49   30.53
  -1  -4  13  813.98   28.50
  -1  -4  13  822.59   30.21
   1   4 -13  854.88   34.75
   1   4 -13  790.99   29.84
   1   4 -13  873.19   31.66
   1   4 -13  764.28   32.95
  -1  -4  12    4.06    1.36
   1   4 -12    3.75    1.41
  -1  -4  12    6.63    1.70
   1   4 -12   11.05    3.23
   1   4 -12    7.74    1.99
   1   4 -12    7.12    2.22
  -1  -4  12   10.69    2.50
  -1  -4  11  395.87   18.04
  -1  -4  11  368.79   17.15
  -1  -4  11  422.45   21.06
   1   4 -11  399.30   17.85
   1   4 -11  365.25   19.73
   1   4 -11  372.99   19.84
   1   4 -11  362.57   19.07
   1   4 -11  391.34   17.21
  -1  -4  10  165.24   10.29
   1   4 -10  171.74    9.99
  -1  -4  10  159.19    9.85
   1   4 -10  187.93   10.65
   1   4 -10  155.68   11.54
  -1  -4  10  178.60   12.43
   1   4  -9 1644.57   51.86
   1   4  -9 1583.01   54.34
  -1  -4   9 1727.12   56.26
   1   4  -9 1641.33   52.36
   1   4  -9 1617.00   55.04
  -1  -4   9 1643.16   52.16
  -1  -4   9 1725.74   50.02
  -1  -4   9 1699.95   52.60
   1   4  -8    1.39    0.98
   1   4  -8    1.90    1.02
  -1  -4   8    1.88    0.82
   1   4  -8    2.48    1.82
  -1  -4   8    3.83    1.35
   1   4  -8    1.31    0.84
  -1  -4   8    3.24    1.47
  -1  -4   8    2.65    1.50
  -1  -4   7 2640.87   80.27
   1   4  -7 3017.05   80.97
  -1  -4   7 2709.59   80.60
  -1  -4   7 2787.62   77.76
   1   4  -7 2713.81   82.73
   1   4  -7 2755.41   83.20
   1   4  -7 2805.18   83.41
  -1  -4   7 2898.52   84.32
   1   4  -7 2715.33   80.32
   1   4  -6    1.37    0.89
   1   4  -6    2.78    1.24
   1   4  -6    2.02    1.34
  -1  -4   6    4.80    1.32
   1   4  -6    3.85    1.41
  -1  -4   6    3.57    0.96
  -1  -4   6    0.81    0.83
  -1  -4   6    1.33    1.01
  -1  -4   6    2.10    1.20
   1   4  -5 3388.24   91.97
  -1  -4   5 3111.84   91.24
   1   4  -5 3340.45   93.90
   1   4  -5 3071.89   93.28
  -1  -4   5 3070.75   91.83
  -1  -4   5 3372.23   94.30
   1   4  -5 3143.84   91.32
  -1  -4   5 3139.74   93.45
  -1  -4   5 3547.44   95.77
   1   4  -4   45.30    4.22
   1   4  -4   50.97    4.33
  -1  -4   4   46.15    4.74
   1   4  -4   43.01    4.59
  -1  -4   4   58.05    5.30
  -1  -4   4   42.78    4.27
  -1  -4   4   44.96    4.91
   1   4  -4   42.23    4.53
  -1  -4   4   47.26    4.16
   1   4  -3   32.55    3.52
  -1  -4   3   30.45    2.84
  -1  -4   3   35.71    3.91
  -1  -4   3   30.89    3.54
  -1  -4   3   32.79    4.17
  -1  -4   3   31.58    3.28
   1   4  -3   32.10    3.64
  -1  -4   3   29.42    3.72
   1   4  -3   31.38    3.79
   1   4  -3   39.68    3.65
  -1  -4   2    5.14    1.42
  -1  -4   2    5.66    1.39
   1   4  -2    3.69    1.22
  -1  -4   2    2.55    0.86
  -1  -4   2    3.48    0.97
  -1  -4   2    3.81    1.28
   1   4  -2    3.45    1.23
   1   4  -2    2.24    0.89
  -1  -4   2    1.98    0.88
   1   4  -2    3.04    1.29
   1   4  -1 3324.64   96.02
  -1  -4   1 3625.43   95.45
  -1  -4   1 3288.24   94.79
  -1  -4   1 3497.16   97.30
   1   4  -1 3356.86   95.36
  -1  -4   1 3464.39   96.42
   1   4  -1 3310.18   94.70
   1   4  -1 3320.35   96.56
   1   4  -1 3287.57   94.70
  -1  -4   1 3386.01   94.27
   1   4   0   96.35    6.82
  -1  -4   0   91.13    5.74
   1   4   0   95.99    6.07
  -1  -4   0   93.30    6.71
   1   4   0  110.52    6.70
   1   4   0  102.29    6.13
   1   4   0  104.28    6.73
   1   4   0   86.49    5.51
  -1  -4   0   99.49    6.06
  -1  -4   0   96.65    6.54
   1   4   1  185.89    9.27
   1   4   1  207.67    9.82
   1   4   1  184.85    9.44
   1   4   1  172.04    8.23
   1   4   1  207.13    9.97
  -1  -4  -1  194.15    9.86
   1   4   1  188.96   10.14
  -1  -4  -1  203.91   10.37
  -1  -4  -1  178.99    9.25
  -1  -4  -1  178.63    8.38
  -1  -4  -2  728.43   24.95
   1   4   2  705.22   24.69
  -1  -4  -2  714.62   25.49
  -1  -4  -2  702.06   24.90
   1   4   2  694.93   24.69
   1   4   2  721.09   22.71
  -1  -4  -2  751.59   23.05
   1   4   2  755.32   25.89
   1   4   2  683.73   24.61
   1   4   3  146.72    8.17
   1   4   3  146.91    8.21
  -1  -4  -3  157.41    6.96
   1   4   3  142.26    8.71
   1   4   3  144.64    6.66
   1   4   3  157.43    8.87
  -1  -4  -3  146.29    8.67
  -1  -4  -3  159.67    8.67
  -1  -4  -4  246.89    9.06
  -1  -4  -4  235.09   11.16
  -1  -4  -4  221.80   10.72
   1   4   4  216.77   11.35
   1   4   4  203.54   10.31
   1   4   4  207.12   11.20
  -1  -4  -4  223.16   11.48
   1   4   4  210.95   10.53
  -1  -4  -5  478.06   20.14
  -1  -4  -5  513.69   19.38
   1   4   5  533.86   20.72
  -1  -4  -5  443.20   18.45
   1   4   5  484.41   18.69
   1   4   5  483.97   18.82
  -1  -4  -5  535.39   16.65
   1   4   5  545.33   20.71
  -1  -4  -6  153.42    6.85
   1   4   6  152.11    8.67
   1   4   6  140.49    9.29
  -1  -4  -6  165.15    9.09
  -1  -4  -6  143.99    9.74
   1   4   6  167.54   10.24
  -1  -4  -6  158.72    9.10
   1   4   6  180.92    9.35
   1   4   7  640.45   23.50
  -1  -4  -7  646.02   23.99
  -1  -4  -7  642.93   25.94
   1   4   7  672.21   25.44
  -1  -4  -7  672.66   24.15
   1   4   7  625.82   23.53
   1   4   7  722.99   26.66
  -1  -4  -8   12.39    1.76
  -1  -4  -8   10.77    2.36
  -1  -4  -8   13.74    3.02
   1   4   8   13.54    2.48
   1   4   8   13.89    3.07
   1   4   8   11.72    2.28
  -1  -4  -8   13.33    2.47
  -1  -4  -9 1878.51   55.94
  -1  -4  -9 1778.94   58.18
   1   4   9 1721.49   54.71
   1   4   9 1882.44   55.84
  -1  -4  -9 1785.38   52.21
  -1  -4  -9 1694.76   55.30
   1   4   9 1821.07   58.66
  -1  -4 -10  173.70   11.88
  -1  -4 -10  165.94   10.28
   1   4  10  173.42   10.35
   1   4  10  180.00   10.36
  -1  -4 -10  159.73    8.50
  -1  -4 -10  173.80   10.71
   1   4  10  187.68   12.38
   1   4  10  179.12   10.51
  -1  -4 -11  707.85   26.85
  -1  -4 -11  686.60   26.10
  -1  -4 -11  654.07   23.10
  -1  -4 -11  626.48   27.98
   1   4  11  686.53   28.88
   1   4  11  638.69   25.28
   1   4  11  685.51   25.60
   1   4  11  648.37   25.79
  -1  -4 -12  729.56   28.45
  -1  -4 -12  714.59   25.62
  -1  -4 -12  791.66   29.80
  -1  -4 -12  725.28   31.14
   1   4  12  786.11   29.16
   1   4  12  769.63   28.29
   1   4  12  712.85   31.21
   1   4  13  422.00   19.90
   1   4  13  424.55   19.20
  -1  -4 -13  424.33   20.55
  -1  -4 -13  411.83   17.30
  -1  -4 -13  454.23   22.81
  -1  -4 -13  478.76   20.67
   1   4  13  403.96   21.98
   1   4  14   96.08    9.34
   1   4  14  112.01    9.13
  -1  -4 -14   87.54    9.37
  -1  -4 -14   94.69    8.75
   1   4  14   86.36    7.68
  -1  -4 -14  103.13    7.29
  -1  -4 -14   99.44    8.60
  -1  -4 -15   40.03    5.52
   1   4  15   39.04    5.43
  -1  -4 -15   33.74    4.30
   1   4  15   30.15    4.44
  -1  -4 -15   34.43    6.24
   1   4  15   36.84    5.53
  -1  -4 -15   24.01    4.56
   1   4  16   31.22    4.91
   1   4  16   29.21    4.41
  -1  -4 -16   34.52    6.32
   1   4  16   35.93    5.81
  -1  -4 -16   30.23    4.20
  -1  -4 -16   33.44    5.46
   1   4  17  765.32   34.01
   1   4  17  832.66   33.22
  -1  -4 -17  761.25   29.11
  -1  -4 -18   11.93    3.86
  -1  -4 -18   17.97    3.39
   1   4  18   22.93    4.94
   1   4  18   10.52    3.46
   1   4  18   10.69    3.11
   1   4  19  265.04   18.76
  -1  -4 -19  308.10   20.84
  -1  -4 -19  288.05   15.88
   1   4  19  263.12   15.88
   1   4  19  292.03   18.45
  -1  -4 -20   15.55    3.40
   1   4  20   25.19    4.50
   1   4  20   16.41    4.36
   1   4  20   14.79    4.61
  -1  -4 -20   19.95    5.26
  -1  -4 -21  315.13   22.37
   1   4  21  314.73   20.33
   1   4  21  327.82   21.99
   1   4  21  304.96   17.89
  -1  -4 -21  304.56   17.41
   1   4  22  299.58   21.60
   1   4  22  305.04   20.78
  -1  -4 -22  278.49   17.18
  -1  -4 -22  320.07   22.95
   1   4  22  315.97   17.99
   1   4  23   12.92    3.49
   1   4  23   14.72    4.82
   1   4  23   22.13    5.49
   1   4  24  232.98   19.53
  -1  -4 -24  214.45   18.99
   1   4  24  196.24   17.16
   1   5 -21  528.58   30.52
   1   5 -21  557.60   31.96
  -1  -5  21  528.01   26.09
  -1  -5  21  539.48   28.51
  -1  -5  20   27.24    5.66
  -1  -5  20   47.81    6.79
   1   5 -20   55.71    9.09
   1   5 -20   45.78    8.04
  -1  -5  19   37.33    5.94
  -1  -5  19   33.70    6.04
   1   5 -19   33.02    6.58
   1   5 -19   21.03    5.22
  -1  -5  18  132.15   10.89
  -1  -5  18   95.33    9.98
   1   5 -18  107.42   11.63
   1   5 -18  138.21   13.77
  -1  -5  17   70.97    7.86
  -1  -5  17   62.17    7.82
   1   5 -17   69.57    9.05
   1   5 -17   77.75   10.01
  -1  -5  16   93.83    8.77
   1   5 -16  101.27   11.03
  -1  -5  16   99.41    9.70
  -1  -5  16   81.45    7.16
   1   5 -16   78.32    9.37
   1   5 -15  281.44   16.87
   1   5 -15  315.58   16.81
   1   5 -15  303.94   19.83
   1   5 -15  322.28   19.62
  -1  -5  15  308.97   17.64
  -1  -5  15  283.11   16.27
  -1  -5  15  311.69   14.92
  -1  -5  14   10.52    2.89
  -1  -5  14    9.52    2.65
  -1  -5  14    9.15    2.27
   1   5 -14   11.27    2.83
   1   5 -14    7.66    2.43
   1   5 -14    8.28    3.21
   1   5 -14    7.95    2.63
   1   5 -13 1036.99   37.69
  -1  -5  13 1015.32   37.73
  -1  -5  13 1050.69   38.56
  -1  -5  13 1073.56   35.29
   1   5 -13 1097.14   42.45
   1   5 -13  959.30   37.51
   1   5 -13 1049.66   40.97
   1   5 -12   21.61    3.81
   1   5 -12   22.84    3.80
  -1  -5  12   25.26    4.18
  -1  -5  12   23.56    4.02
  -1  -5  12   20.99    2.98
   1   5 -12   16.26    4.04
   1   5 -12   19.55    4.09
  -1  -5  11  447.46   20.69
  -1  -5  11  468.77   20.86
   1   5 -11  466.95   23.37
   1   5 -11  496.03   21.02
  -1  -5  11  476.39   18.41
   1   5 -11  435.32   20.40
   1   5 -11  475.80   22.96
  -1  -5  10  498.07   21.43
   1   5 -10  492.19   23.19
   1   5 -10  481.11   23.52
  -1  -5  10  462.36   23.64
   1   5 -10  535.72   21.62
   1   5 -10  466.04   23.20
  -1  -5  10  497.19   18.75
  -1  -5  10  479.39   21.26
   1   5  -9   17.76    3.24
   1   5  -9   15.13    3.43
   1   5  -9   21.18    3.50
  -1  -5   9   15.47    2.46
  -1  -5   9   15.25    2.81
  -1  -5   9   18.80    3.87
   1   5  -9   11.81    3.12
   1   5  -9   16.39    3.56
  -1  -5   9    9.91    2.70
  -1  -5   9   11.72    3.18
  -1  -5   8 1364.58   44.47
   1   5  -8 1521.24   48.12
   1   5  -8 1370.16   44.28
  -1  -5   8 1145.55   45.89
  -1  -5   8 1383.94   41.35
  -1  -5   8 1315.21   48.02
   1   5  -8 1295.34   46.21
   1   5  -8 1349.50   46.92
  -1  -5   8 1372.14   44.83
  -1  -5   7 1050.25   35.71
   1   5  -7  949.30   34.33
   1   5  -7  980.06   36.75
  -1  -5   7  979.68   34.68
   1   5  -7 1023.15   37.22
  -1  -5   7 1036.48   32.34
   1   5  -7 1038.63   35.09
  -1  -5   7 1027.57   37.65
  -1  -5   6 1337.04   44.59
   1   5  -6 1468.02   47.26
  -1  -5   6 1344.83   45.23
  -1  -5   6 1534.71   48.19
  -1  -5   6 1379.51   46.70
   1   5  -6 1349.05   46.64
   1   5  -6 1356.12   44.56
   1   5  -6 1477.88   45.43
  -1  -5   6 1406.23   48.29
   1   5  -5   15.24    2.70
  -1  -5   5   19.25    3.50
   1   5  -5   18.77    3.01
  -1  -5   5   12.98    2.55
  -1  -5   5   19.50    3.15
   1   5  -5   15.83    3.14
   1   5  -5   11.16    2.99
  -1  -5   5   19.28    3.36
  -1  -5   5   16.04    3.34
  -1  -5   4  845.73   31.62
   1   5  -4  799.39   29.71
  -1  -5   4  833.20   30.53
   1   5  -4  797.08   30.14
  -1  -5   4  823.69   30.27
  -1  -5   4  836.41   27.38
   1   5  -4  812.40   28.66
  -1  -5   4  780.80   29.13
  -1  -5   4  882.26   29.36
   1   5  -4  878.43   29.53
   1   5  -3  495.57   20.59
  -1  -5   3  526.62   19.24
   1   5  -3  531.60   20.61
  -1  -5   3  560.15   20.70
   1   5  -3  534.23   20.31
  -1  -5   3  509.16   22.24
  -1  -5   3  505.74   20.90
  -1  -5   3  489.60   20.48
  -1  -5   3  547.02   21.79
   1   5  -3  524.19   21.50
   1   5  -2   63.94    5.57
  -1  -5   2   66.67    6.01
  -1  -5   2   62.42    5.05
   1   5  -2   76.38    6.46
   1   5  -2   66.01    6.20
  -1  -5   2   67.62    5.74
   1   5  -2   65.76    5.63
  -1  -5   2   61.09    5.36
  -1  -5   2   68.83    6.46
   1   5  -1  116.03    8.39
  -1  -5   1  148.64    9.11
   1   5  -1  124.58    7.96
   1   5  -1  112.54    7.47
  -1  -5   1  113.67    7.54
  -1  -5   1  111.90    7.15
   1   5  -1  121.49    7.50
  -1  -5   1  109.19    7.32
  -1  -5   1  128.36    8.90
   1   5   0   41.00    3.99
  -1  -5   0   38.45    4.60
  -1  -5   0   30.95    4.01
   1   5   0   52.49    5.45
  -1  -5   0   38.30    3.95
  -1  -5   0   38.52    4.17
   1   5   0   39.57    4.19
   1   5   0   44.45    4.76
   1   5   0   46.10    4.66
  -1  -5  -1  322.89   14.97
   1   5   1  390.16   15.91
  -1  -5  -1  337.45   15.58
   1   5   1  367.68   15.60
  -1  -5  -1  357.09   14.28
   1   5   1  327.01   14.81
  -1  -5  -1  334.30   15.92
   1   5   1  335.31   13.94
   1   5   1  339.00   16.08
   1   5   1  347.59   15.52
   1   5   2   51.46    4.99
   1   5   2   55.61    4.36
   1   5   2   46.29    5.04
  -1  -5  -2   58.35    5.51
  -1  -5  -2   55.40    5.60
  -1  -5  -2   55.68    4.45
   1   5   2   47.44    4.83
  -1  -5  -2   52.95    5.14
   1   5   2   57.70    5.38
   1   5   2   46.15    4.80
   1   5   2   56.17    5.60
   1   5   3 1152.01   38.97
  -1  -5  -3 1254.64   38.83
   1   5   3 1171.11   35.21
  -1  -5  -3 1177.71   38.82
   1   5   3 1122.95   37.64
   1   5   3 1119.34   38.25
   1   5   3 1119.87   37.84
  -1  -5  -3 1120.61   35.34
  -1  -5  -3 1100.06   38.22
   1   5   4  261.07   12.76
   1   5   4  246.22   13.19
   1   5   4  232.27   12.17
  -1  -5  -4  229.82   12.93
  -1  -5  -4  244.46   10.44
  -1  -5  -4  237.03   12.47
   1   5   4  277.22   13.71
  -1  -5  -4  234.41   12.66
  -1  -5  -5  160.41    9.84
  -1  -5  -5  150.23   10.05
   1   5   5  159.71    9.56
   1   5   5  148.04    9.31
   1   5   5  151.27   10.20
  -1  -5  -5  161.06    7.67
   1   5   5  169.59   10.52
  -1  -5  -6   16.37    3.02
   1   5   6   12.37    2.57
   1   5   6   19.69    3.27
   1   5   6   13.75    2.88
   1   5   6   12.70    2.74
  -1  -5  -6   20.52    3.15
  -1  -5  -6   13.46    2.01
  -1  -5  -6   13.74    3.04
   1   5   7   11.40    2.85
   1   5   7    7.69    2.43
  -1  -5  -7    9.26    2.05
  -1  -5  -7   10.34    2.42
  -1  -5  -7   12.16    1.81
  -1  -5  -7    5.54    2.03
   1   5   7    9.94    2.16
   1   5   8  623.29   23.89
   1   5   8  628.99   25.53
   1   5   8  606.15   23.94
  -1  -5  -8  669.35   24.99
  -1  -5  -8  692.23   25.17
   1   5   8  638.19   26.52
   1   5   9  366.63   18.18
   1   5   9  342.45   16.52
  -1  -5  -9  316.32   18.03
  -1  -5  -9  349.73   16.95
  -1  -5  -9  379.01   17.89
   1   5   9  303.49   17.61
   1   5   9  424.73   17.72
  -1  -5 -10   77.44    7.06
   1   5  10   74.38    6.86
   1   5  10   63.28    7.37
  -1  -5 -10   78.41    8.15
   1   5  10   59.56    6.05
  -1  -5 -10   69.06    6.84
  -1  -5 -10   68.07    5.13
  -1  -5 -11  733.37   28.30
  -1  -5 -11  675.02   23.98
  -1  -5 -11  757.86   28.71
   1   5  11  706.29   27.68
  -1  -5 -11  697.84   30.35
   1   5  11  697.85   27.17
  -1  -5 -12  415.69   20.19
   1   5  12  407.27   19.23
  -1  -5 -12  435.42   20.18
   1   5  12  403.05   19.03
   1   5  12  439.25   22.59
   1   5  12  385.85   19.29
  -1  -5 -12  410.91   21.99
  -1  -5 -13   46.74    7.10
  -1  -5 -13   49.88    6.38
  -1  -5 -13   41.63    4.34
   1   5  13   43.80    5.68
   1   5  13   44.18    5.52
   1   5  13   51.51    6.06
  -1  -5 -13   45.96    5.83
  -1  -5 -14    2.30    2.31
   1   5  14   -1.06    1.45
  -1  -5 -14    3.10    1.26
  -1  -5 -14    3.61    2.02
   1   5  14    2.07    1.37
  -1  -5 -14    1.34    1.53
  -1  -5 -15   -1.08    2.14
  -1  -5 -15    3.50    1.82
  -1  -5 -15    7.07    2.15
   1   5  15    4.19    1.53
   1   5  15    6.05    2.26
   1   5  16    6.17    2.40
   1   5  16    7.98    2.37
  -1  -5 -16    6.93    2.05
   1   5  16    7.32    4.00
  -1  -5 -16   10.96    3.68
  -1  -5 -17  200.42   11.87
   1   5  17  194.61   14.17
  -1  -5 -17  180.05   15.58
   1   5  17  187.64   12.90
   1   5  17  230.54   16.41
  -1  -5 -18    7.23    2.37
   1   5  18    4.27    1.61
  -1  -5 -18    4.29    2.45
   1   5  18    5.69    2.27
   1   5  18    5.08    2.07
   1   5  19   19.43    4.66
   1   5  19   22.29    5.32
  -1  -5 -19   18.04    3.50
   1   5  19   15.20    3.53
   1   5  20  126.52   13.46
  -1  -5 -20  147.68   10.86
  -1  -5 -20  139.93   14.47
   1   5  20  133.57   12.47
   1   5  20  154.55   11.88
  -1  -5 -21   21.99    4.08
   1   5  21   40.01    6.03
   1   5  21   30.13    5.86
  -1  -5 -21   27.92    6.62
   1   5  21   32.09    6.57
   1   5  22   88.62    9.36
   1   5  22  111.69   11.97
   1   5  23    5.01    3.80
  -1  -5 -23   13.15    4.67
   1   5  23    7.21    3.21
  -1  -6  20  137.92   13.16
   1   6 -20  124.82   13.87
   1   6 -20  126.38   13.56
  -1  -6  20  134.34   12.13
  -1  -6  19   76.08    9.50
  -1  -6  19   87.21    9.47
   1   6 -19   82.01   11.07
   1   6 -19   79.39   10.50
   1   6 -18  108.28   12.07
  -1  -6  18  114.55   10.71
   1   6 -18  114.40   12.93
  -1  -6  18   91.43   10.22
   1   6 -17  147.77   14.62
   1   6 -17  154.09   14.11
  -1  -6  17  168.68   13.53
  -1  -6  17  161.18   12.84
  -1  -6  16   57.20    7.20
   1   6 -16   53.81    8.11
   1   6 -16   54.17    8.31
  -1  -6  16   48.23    6.99
   1   6 -15  503.94   26.96
  -1  -6  15  449.64   20.46
  -1  -6  15  551.97   25.33
   1   6 -15  589.48   29.49
  -1  -6  15  521.98   25.28
  -1  -6  15  525.64   30.02
   1   6 -14   12.99    4.23
  -1  -6  14    5.08    2.48
  -1  -6  14    3.56    3.84
  -1  -6  14   10.03    2.74
  -1  -6  14    6.77    1.73
   1   6 -14   11.26    3.49
   1   6 -13  328.54   19.93
  -1  -6  13  327.20   18.22
   1   6 -13  309.77   20.06
   1   6 -13  302.24   17.45
  -1  -6  13  346.88   18.62
  -1  -6  13  371.18   22.96
   1   6 -12    4.18    1.73
  -1  -6  12    4.40    2.04
   1   6 -12   -0.85    1.95
  -1  -6  12    6.74    2.85
   1   6 -12    6.15    2.01
  -1  -6  12    4.71    2.39
  -1  -6  12    4.27    1.50
   1   6 -12    4.89    2.39
  -1  -6  11  160.16    9.17
   1   6 -11  160.45   10.96
   1   6 -11  149.28   12.29
  -1  -6  11  173.13   14.12
  -1  -6  11  156.08   11.15
   1   6 -11  148.33   11.85
   1   6 -10 1040.02   41.26
   1   6 -10 1070.57   41.22
  -1  -6  10 1057.34   35.36
  -1  -6  10 1116.97   39.58
  -1  -6  10 1158.65   40.22
   1   6 -10 1091.47   39.02
  -1  -6  10 1059.92   43.30
   1   6 -10 1023.27   38.32
  -1  -6   9   50.30    6.01
  -1  -6   9   46.71    6.83
  -1  -6   9   39.05    4.25
   1   6  -9   35.78    5.03
  -1  -6   9   35.19    4.76
   1   6  -9   32.96    5.48
   1   6  -9   38.15    5.56
   1   6  -9   42.49    5.45
  -1  -6   8 1668.28   58.78
  -1  -6   8 1687.39   56.53
   1   6  -8 1752.35   56.23
   1   6  -8 1667.91   58.25
  -1  -6   8 1827.75   56.74
   1   6  -8 1789.65   56.24
   1   6  -8 1665.17   57.96
  -1  -6   8 1779.37   53.04
  -1  -6   8 1723.81   60.31
  -1  -6   7  707.55   30.12
  -1  -6   7  724.06   28.26
  -1  -6   7  686.99   31.00
   1   6  -7  748.60   30.32
  -1  -6   7  739.20   30.13
   1   6  -7  721.81   28.22
   1   6  -7  816.98   29.12
  -1  -6   7  739.80   28.95
   1   6  -7  698.59   29.72
   1   6  -6   82.97    7.22
  -1  -6   6   81.78    7.15
  -1  -6   6   89.48    8.22
  -1  -6   6   84.78    7.88
   1   6  -6   83.25    7.82
  -1  -6   6   71.50    7.04
   1   6  -6   79.55    7.79
   1   6  -6   72.95    6.68
  -1  -6   6   70.30    7.90
  -1  -6   5 2528.60   71.45
   1   6  -5 2550.19   73.74
  -1  -6   5 2393.34   75.29
  -1  -6   5 2336.87   73.11
  -1  -6   5 2228.14   73.56
  -1  -6   5 2390.88   76.89
  -1  -6   5 2412.33   75.20
   1   6  -5 2430.22   73.51
   1   6  -5 2455.08   75.44
   1   6  -4  486.29   20.81
   1   6  -4  484.29   20.66
  -1  -6   4  454.40   20.34
  -1  -6   4  540.70   23.83
  -1  -6   4  531.80   19.95
   1   6  -4  549.25   22.20
   1   6  -4  468.22   21.62
  -1  -6   4  527.32   22.58
  -1  -6   4  447.30   20.83
  -1  -6   4  475.74   21.55
   1   6  -3  375.14   16.74
  -1  -6   3  333.86   16.24
  -1  -6   3  348.99   15.56
  -1  -6   3  354.49   18.36
   1   6  -3  367.13   17.71
  -1  -6   3  358.88   17.03
   1   6  -3  321.82   16.18
  -1  -6   3  359.94   17.74
   1   6  -3  373.59   17.02
  -1  -6   2  769.22   29.11
  -1  -6   2  732.03   27.53
   1   6  -2  834.72   30.19
  -1  -6   2  698.79   26.36
  -1  -6   2  718.51   27.43
   1   6  -2  685.42   27.92
   1   6  -2  776.98   27.79
  -1  -6   2  689.52   29.03
   1   6  -2  720.48   27.56
  -1  -6   1  583.95   24.51
   1   6  -1  647.55   24.38
   1   6  -1  593.15   24.33
   1   6  -1  573.27   23.38
  -1  -6   1  624.82   23.41
  -1  -6   1  595.69   23.17
   1   6  -1  565.36   22.68
   1   6  -1  580.61   24.66
  -1  -6   0 4614.48  128.27
   1   6   0 4392.77  129.87
   1   6   0 4534.82  127.75
   1   6   0 4539.06  129.55
  -1  -6   0 5100.81  131.92
   1   6   0 4737.00  129.80
  -1  -6   0 4384.64  130.72
   1   6   0 4568.66  130.98
  -1  -6   0 4158.25  128.19
  -1  -6  -1   17.16    3.58
   1   6   1   17.10    3.24
  -1  -6  -1   17.66    3.25
  -1  -6  -1   14.02    3.08
   1   6   1   19.18    3.04
   1   6   1   17.09    3.60
   1   6   1   22.70    3.92
   1   6   1   17.68    3.57
   1   6   1   13.98    3.14
  -1  -6  -1   14.06    2.63
  -1  -6  -2  184.26   11.56
   1   6   2  180.53   11.11
   1   6   2  181.44   11.20
  -1  -6  -2  185.22   11.85
  -1  -6  -2  220.33   12.25
  -1  -6  -2  191.28   10.09
   1   6   2  215.20   12.04
   1   6   2  194.55   10.13
   1   6   2  186.63   11.93
   1   6   2  180.42   11.24
   1   6   3  503.24   22.11
   1   6   3  515.08   21.79
   1   6   3  477.44   20.85
   1   6   3  493.17   21.52
  -1  -6  -3  491.82   21.69
   1   6   3  493.90   21.53
  -1  -6  -3  543.24   22.39
  -1  -6  -3  504.32   19.14
   1   6   3  504.61   21.22
  -1  -6  -3  508.97   21.81
  -1  -6  -4  251.89   14.41
   1   6   4  249.00   14.16
   1   6   4  273.52   14.55
   1   6   4  251.78   13.55
   1   6   4  304.51   14.77
   1   6   4  231.54   13.42
  -1  -6  -4  254.45   11.78
  -1  -6  -4  244.74   13.98
   1   6   4  284.72   15.08
  -1  -6  -4  283.15   14.65
  -1  -6  -5  886.17   34.12
   1   6   5  884.10   32.81
   1   6   5  938.84   34.25
  -1  -6  -5  939.61   29.92
   1   6   5  947.96   34.60
   1   6   5  838.77   32.48
  -1  -6  -5  900.35   33.36
  -1  -6  -6  781.00   31.45
   1   6   6  802.47   29.83
   1   6   6  817.70   31.70
   1   6   6  787.07   30.98
  -1  -6  -6  809.02   26.55
  -1  -6  -6  764.80   30.07
   1   6   6  761.60   29.67
  -1  -6  -7  953.65   35.62
  -1  -6  -7  860.90   28.82
  -1  -6  -7  894.22   33.43
   1   6   7  847.59   32.34
   1   6   7  847.88   32.40
   1   6   7  857.25   34.47
   1   6   7  862.71   33.78
  -1  -6  -7  999.87   34.33
   1   6   8  640.36   25.62
   1   6   8  615.19   25.66
   1   6   8  633.91   27.07
  -1  -6  -8  631.88   21.98
  -1  -6  -8  635.99   28.11
   1   6   8  621.12   27.75
  -1  -6  -8  620.13   26.07
   1   6   9   52.44    7.08
  -1  -6  -9   70.21    7.17
   1   6   9   52.21    6.01
   1   6   9   51.79    5.96
  -1  -6  -9   64.40    7.76
  -1  -6  -9   57.73    6.47
   1   6   9   60.69    7.04
  -1  -6  -9   59.66    4.83
   1   6  10  146.75   11.43
   1   6  10  158.88   10.89
  -1  -6 -10  137.31    8.21
  -1  -6 -10  132.82   10.48
   1   6  10  153.04   12.33
  -1  -6 -10  146.10   12.00
  -1  -6 -10  147.64   10.97
   1   6  10  142.27   10.30
  -1  -6 -11  755.27   30.56
   1   6  11  763.03   31.82
   1   6  11  738.55   29.87
  -1  -6 -11  687.43   29.71
  -1  -6 -11  747.71   32.82
  -1  -6 -11  737.27   25.78
   1   6  11  719.44   29.29
  -1  -6 -12  103.36    7.17
   1   6  12   97.25    8.75
   1   6  12  109.43    9.30
   1   6  12   81.99    8.76
  -1  -6 -12   88.97    8.84
  -1  -6 -12   90.29    9.60
  -1  -6 -12   85.32    8.58
   1   6  13  214.81   13.89
   1   6  13  186.71   12.85
  -1  -6 -13  201.89   14.12
   1   6  13  239.55   14.64
  -1  -6 -13  219.36   16.15
  -1  -6 -13  196.74   11.02
  -1  -6 -14   91.24    9.49
  -1  -6 -14  111.63    7.84
   1   6  14  108.30    9.77
   1   6  14  118.03    9.88
   1   6  14  124.34   10.45
   1   6  15   49.59    6.55
  -1  -6 -15   43.97    4.91
  -1  -6 -15   44.45    7.30
   1   6  15   50.20    6.22
  -1  -6 -16  512.21   21.18
   1   6  16  466.71   23.12
  -1  -6 -16  484.22   27.55
   1   6  16  505.55   25.06
  -1  -6 -17  153.83   10.31
  -1  -6 -17  156.08   14.89
   1   6  17  160.04   12.29
   1   6  17  160.88   13.10
   1   6  18  323.41   21.46
   1   6  18  316.01   18.25
  -1  -6 -18  322.47   16.20
   1   6  18  310.30   19.58
  -1  -6 -18  316.91   22.33
   1   6  19   78.01    8.39
   1   6  19   90.36   10.23
   1   6  19   79.79   10.47
  -1  -6 -19   74.78   10.76
  -1  -6 -19   80.86    7.64
   1   6  20  169.56   15.80
   1   6  20  185.88   13.51
   1   6  20  164.19   14.16
  -1  -6 -20  168.39   16.54
  -1  -6 -20  146.76   10.91
   1   6  21   14.98    3.91
   1   6  21   17.45    5.04
   1   6  21   14.91    5.22
  -1  -6 -21   11.10    4.00
   1   6  22   87.50   11.04
  -1  -6 -22   67.33   10.81
   1   6  22   89.08    9.45
   1   6  22  105.98   12.83
  -1  -7  19    9.91    5.29
   1   7 -19   16.92    5.73
  -1  -7  19   18.41    4.92
   1   7 -19   18.73    5.21
  -1  -7  19   15.31    4.50
  -1  -7  18   13.08    5.62
  -1  -7  18   13.65    4.04
   1   7 -18   17.99    5.42
  -1  -7  18    8.34    3.13
   1   7 -18    9.60    3.65
   1   7 -17   43.37    7.84
  -1  -7  17   44.19    6.92
  -1  -7  17   46.82    9.13
   1   7 -17   48.99    8.66
   1   7 -16   31.90    6.68
   1   7 -16   40.83    7.53
  -1  -7  16   33.72    5.77
  -1  -7  16   24.70    6.54
   1   7 -15   56.09    8.68
  -1  -7  15   66.04    8.31
  -1  -7  15   70.88   10.18
   1   7 -15   61.68    8.72
  -1  -7  14    8.28    4.46
  -1  -7  14    3.81    2.24
   1   7 -14    4.35    3.03
  -1  -7  14    4.61    2.74
  -1  -7  13  137.81   11.59
   1   7 -13   98.61   11.22
  -1  -7  13  116.22    8.40
  -1  -7  13  120.89   10.88
  -1  -7  13   98.93   11.81
  -1  -7  12   12.87    2.72
  -1  -7  12   19.06    4.98
  -1  -7  12   16.71    4.23
   1   7 -12   17.25    4.22
   1   7 -12   15.35    4.21
  -1  -7  12   19.52    4.37
  -1  -7  11  174.46   12.51
  -1  -7  11  163.36   12.57
  -1  -7  11  157.95    9.94
  -1  -7  11  165.47   14.51
   1   7 -11  141.59   12.70
   1   7 -11  139.33   11.28
   1   7 -11  148.57   12.73
  -1  -7  10  339.22   15.76
   1   7 -10  350.18   18.50
  -1  -7  10  345.32   18.93
  -1  -7  10  328.10   21.35
   1   7 -10  338.00   19.97
  -1  -7  10  343.33   18.62
   1   7 -10  324.37   19.73
  -1  -7   9   12.69    3.94
   1   7  -9   25.36    5.00
   1   7  -9   20.72    4.12
  -1  -7   9   14.23    3.47
  -1  -7   9   12.00    3.37
  -1  -7   9   14.14    2.78
   1   7  -8   29.01    5.21
  -1  -7   8   18.18    4.41
  -1  -7   8   18.19    3.83
  -1  -7   8   23.45    4.36
  -1  -7   8   29.52    4.09
   1   7  -8   32.37    5.18
   1   7  -8   26.41    4.36
   1   7  -8   15.58    3.90
   1   7  -7  346.04   18.12
   1   7  -7  394.93   20.50
  -1  -7   7  371.05   16.81
  -1  -7   7  368.58   19.04
  -1  -7   7  356.22   18.38
  -1  -7   7  326.60   20.22
   1   7  -7  362.14   18.49
   1   7  -7  365.02   19.76
   1   7  -6   42.44    5.40
  -1  -7   6   47.58    6.66
  -1  -7   6   41.28    5.37
  -1  -7   6   41.61    5.55
  -1  -7   6   43.07    6.00
  -1  -7   6   39.51    5.87
   1   7  -6   51.80    6.01
   1   7  -6   31.05    5.21
  -1  -7   6   41.14    4.68
   1   7  -6   46.85    6.14
  -1  -7   5  530.47   25.28
   1   7  -5  471.80   21.67
  -1  -7   5  492.85   22.74
   1   7  -5  488.47   23.29
  -1  -7   5  495.56   22.26
  -1  -7   5  508.95   23.47
   1   7  -5  489.33   22.70
   1   7  -5  432.93   21.28
  -1  -7   5  508.27   23.80
  -1  -7   5  496.82   20.64
   1   7  -4   26.54    4.63
  -1  -7   4   32.16    4.85
   1   7  -4   32.93    4.58
  -1  -7   4   31.01    4.12
  -1  -7   4   31.41    4.82
  -1  -7   4   24.96    4.67
  -1  -7   4   31.12    4.66
   1   7  -4   27.33    4.48
   1   7  -3    9.43    2.19
  -1  -7   3    7.03    2.73
  -1  -7   3    8.96    2.56
   1   7  -3   10.54    2.95
  -1  -7   3    5.38    2.42
  -1  -7   3   10.58    2.53
   1   7  -3    8.91    2.46
   1   7  -3    9.39    2.75
  -1  -7   3    9.40    3.05
   1   7  -2  413.91   19.10
   1   7  -2  438.85   19.72
  -1  -7   2  398.92   18.57
   1   7  -2  428.53   19.71
  -1  -7   2  397.46   19.19
  -1  -7   2  399.11   20.08
  -1  -7   2  426.27   21.19
   1   7  -2  367.68   19.34
   1   7  -2  395.17   20.23
  -1  -7   1   22.14    4.29
  -1  -7   1   15.48    3.11
   1   7  -1   18.01    3.54
   1   7  -1   19.61    3.77
   1   7  -1   17.28    3.44
  -1  -7   1   17.81    3.38
   1   7  -1   25.10    3.82
   1   7  -1   18.09    3.93
  -1  -7   1   21.34    4.14
   1   7   0  553.98   23.54
  -1  -7   0  502.21   22.68
   1   7   0  499.60   23.20
   1   7   0  538.75   23.38
  -1  -7   0  554.93   24.38
   1   7   0  575.32   25.02
   1   7   0  545.43   22.28
  -1  -7   0  576.51   25.08
  -1  -7   0  541.68   22.49
  -1  -7  -1  240.02   14.52
   1   7   1  229.02   13.83
   1   7   1  226.01   14.09
   1   7   1  207.30   13.07
   1   7   1  227.55   12.20
  -1  -7  -1  227.96   13.53
  -1  -7  -1  212.64   13.54
   1   7   1  234.68   14.39
   1   7   1  229.34   13.63
  -1  -7  -1  228.67   12.45
   1   7   2  162.76   11.08
   1   7   2  141.65   10.62
  -1  -7  -2  158.19   11.44
  -1  -7  -2  169.53   11.82
   1   7   2  155.24   11.35
   1   7   2  151.46   11.21
  -1  -7  -2  143.94    9.43
   1   7   2  152.78    9.47
   1   7   2  152.82   10.91
  -1  -7  -2  157.60   11.05
   1   7   3 1283.81   44.73
   1   7   3 1273.53   44.97
   1   7   3 1331.38   45.92
  -1  -7  -3 1259.80   45.40
  -1  -7  -3 1393.15   42.85
  -1  -7  -3 1198.70   44.96
  -1  -7  -3 1283.85   45.73
   1   7   3 1395.11   46.94
   1   7   3 1300.45   45.42
   1   7   3 1262.53   45.12
   1   7   4   69.36    7.28
  -1  -7  -4   54.13    6.33
  -1  -7  -4   56.10    6.56
   1   7   4   58.74    6.82
  -1  -7  -4   47.76    6.16
   1   7   4   56.55    6.57
   1   7   4   57.97    6.44
   1   7   4   55.47    6.27
   1   7   4   68.75    7.28
   1   7   5  989.14   37.88
  -1  -7  -5 1138.21   39.64
   1   7   5 1005.39   38.49
   1   7   5 1011.65   37.52
   1   7   5 1054.74   39.37
  -1  -7  -5  980.79   38.84
  -1  -7  -5 1068.69   34.75
   1   7   5 1015.21   37.88
   1   7   6  634.92   27.50
  -1  -7  -6  699.69   28.22
   1   7   6  584.21   26.08
  -1  -7  -6  601.41   27.61
   1   7   6  577.19   25.70
   1   7   6  597.84   27.49
   1   7   6  668.85   27.94
  -1  -7  -6  646.20   23.34
   1   7   6  600.85   26.13
   1   7   7  284.62   16.88
   1   7   7  309.95   16.67
   1   7   7  267.99   16.83
  -1  -7  -7  277.44   16.23
  -1  -7  -7  262.55   16.81
  -1  -7  -7  295.64   13.36
   1   7   7  282.25   15.94
   1   7   8 1079.38   43.39
  -1  -7  -8 1112.44   42.20
   1   7   8 1071.76   40.93
   1   7   8 1259.29   42.79
   1   7   8 1181.94   43.60
  -1  -7  -8 1180.50   37.34
  -1  -7  -8 1140.94   43.99
  -1  -7  -9  129.66   10.80
   1   7   9  129.44   10.23
  -1  -7  -9  132.63   10.83
  -1  -7  -9  147.05   12.23
   1   7   9  118.96   10.54
   1   7   9  147.17   11.06
  -1  -7  -9  135.00    8.15
   1   7  10   75.36    8.44
   1   7  10   74.19    7.82
  -1  -7 -10   70.22    8.60
  -1  -7 -10   71.64    5.78
   1   7  10   85.42    8.34
  -1  -7 -11  192.04   15.34
   1   7  11  223.56   14.39
  -1  -7 -11  207.54   11.01
   1   7  11  214.20   13.95
   1   7  12  639.82   29.39
  -1  -7 -12  706.56   25.23
   1   7  12  684.85   29.63
  -1  -7 -12  724.53   25.95
  -1  -7 -12  679.67   30.62
  -1  -7 -12  694.65   33.06
   1   7  13  574.25   26.21
  -1  -7 -13  574.70   21.97
  -1  -7 -13  589.77   29.90
   1   7  13  537.61   25.98
  -1  -7 -13  515.92   21.03
   1   7  14  288.12   17.47
   1   7  14  303.77   18.42
   1   7  14  317.35   18.53
  -1  -7 -14  317.24   14.98
  -1  -7 -14  297.53   20.61
   1   7  15  233.64   15.18
   1   7  15  202.14   14.88
   1   7  15  217.84   15.41
  -1  -7 -15  238.39   18.38
  -1  -7 -15  216.47   12.15
  -1  -7 -16   30.29    4.48
   1   7  16   36.25    6.09
   1   7  16   33.50    5.75
  -1  -7 -16   37.23    7.60
   1   7  17  110.47   11.07
  -1  -7 -17  100.07   12.19
  -1  -7 -17   88.68    7.58
   1   7  17   91.79    9.38
  -1  -7 -18   64.56    9.83
  -1  -7 -18   70.48    6.84
   1   7  18   85.46    9.94
   1   7  18   79.65    8.89
  -1  -7 -19   10.80    4.39
   1   7  19   18.21    4.47
   1   7  19   15.48    4.18
   1   7  19   16.45    4.77
   1   7  20   25.67    5.94
   1   7  20   17.84    5.24
   1   7  20   22.00    4.74
  -1  -7 -20   30.47    7.71
   1   7  21  195.22   18.21
  -1  -7 -21  232.20   20.62
   1   7  21  194.21   14.81
   1   7  21  214.88   17.25
  -1  -8  18    4.16    3.17
  -1  -8  18    0.25    2.12
   1   8 -18    9.10    4.37
  -1  -8  18    3.51    1.82
   1   8 -18   10.74    4.32
  -1  -8  17   78.95    9.78
   1   8 -17   67.80   10.40
  -1  -8  17   65.80    9.11
  -1  -8  17   83.22   12.31
   1   8 -17   80.37   10.73
   1   8 -16   16.89    5.30
  -1  -8  16   15.96    4.94
  -1  -8  16   18.77    5.69
   1   8 -16   14.08    4.51
  -1  -8  16   13.62    3.89
   1   8 -15  139.62   13.91
   1   8 -15  146.73   14.74
  -1  -8  15  132.73   12.60
  -1  -8  15  139.98   12.90
  -1  -8  15  161.18   16.81
   1   8 -14    7.83    3.51
  -1  -8  14   11.39    3.57
   1   8 -14    8.27    3.45
  -1  -8  14    9.04    3.57
  -1  -8  14    9.35    3.83
  -1  -8  13  145.46   15.27
   1   8 -13  143.96   13.89
  -1  -8  13  139.17   12.34
  -1  -8  13  153.21   13.22
   1   8 -13  165.00   14.51
  -1  -8  12   80.09    9.10
   1   8 -12   82.87   10.17
  -1  -8  12   68.40    8.54
  -1  -8  12   73.52   10.46
  -1  -8  12   69.16    6.75
   1   8 -12   61.19    8.56
  -1  -8  11  534.01   30.18
  -1  -8  11  529.31   26.43
  -1  -8  11  512.94   22.27
  -1  -8  11  510.74   21.88
  -1  -8  11  515.71   25.74
   1   8 -11  514.81   27.59
   1   8 -11  533.75   27.82
  -1  -8  10   35.63    4.70
  -1  -8  10   41.87    6.20
   1   8 -10   26.06    5.24
  -1  -8  10   40.00    5.00
  -1  -8  10   34.91    5.93
   1   8 -10   43.85    6.93
  -1  -8  10   33.02    6.52
  -1  -8   9  584.27   30.25
  -1  -8   9  556.16   26.56
   1   8  -9  556.62   27.61
  -1  -8   9  540.00   25.77
  -1  -8   9  527.93   22.74
  -1  -8   9  510.87   22.11
   1   8  -9  511.10   26.65
   1   8  -8   72.43    8.62
   1   8  -8   68.04    8.36
  -1  -8   8   78.14    8.45
  -1  -8   8   66.65    7.74
  -1  -8   8   61.55    6.39
   1   8  -7  372.53   21.16
  -1  -8   7  366.16   19.76
  -1  -8   7  355.88   22.09
  -1  -8   7  370.21   20.34
   1   8  -7  369.68   20.62
  -1  -8   7  349.89   17.53
   1   8  -6   63.05    7.86
   1   8  -6   58.23    7.46
  -1  -8   6   63.10    6.62
   1   8  -6   59.09    6.87
  -1  -8   6   70.11    7.72
  -1  -8   6   60.68    8.17
  -1  -8   5   46.59    7.22
   1   8  -5   58.69    6.80
   1   8  -5   60.88    7.75
  -1  -8   5   63.26    6.60
  -1  -8   5   59.19    7.12
   1   8  -5   66.03    7.43
   1   8  -4  265.26   16.88
  -1  -8   4  304.45   15.92
   1   8  -4  300.19   16.78
  -1  -8   4  262.36   17.76
  -1  -8   4  270.06   16.42
  -1  -8   4  288.48   17.12
   1   8  -4  274.26   16.30
  -1  -8   3    3.60    1.82
  -1  -8   3    4.86    2.86
  -1  -8   3    4.99    1.93
  -1  -8   3    5.29    1.89
   1   8  -3    6.40    2.38
   1   8  -3    5.05    2.49
   1   8  -3    7.52    2.66
   1   8  -2  400.76   21.31
   1   8  -2  430.00   21.02
  -1  -8   2  411.02   22.33
  -1  -8   2  387.53   19.68
   1   8  -2  412.00   20.16
  -1  -8   2  480.18   21.68
   1   8  -2  396.65   21.53
   1   8  -1  426.69   20.35
   1   8  -1  406.56   21.60
  -1  -8   1  466.38   21.50
   1   8  -1  442.61   22.43
   1   8  -1  436.58   21.37
  -1  -8   1  438.63   20.89
  -1  -8   1  414.10   22.27
  -1  -8   0   26.66    4.49
   1   8   0   29.55    4.98
  -1  -8   0   22.11    4.74
   1   8   0   16.85    3.80
  -1  -8   0   19.39    3.80
   1   8   0   30.57    5.30
   1   8   0   22.71    3.97
   1   8   0   27.90    4.74
   1   8   1  157.31   12.45
   1   8   1  151.79   12.12
   1   8   1  147.10   11.57
  -1  -8  -1  156.14   12.26
  -1  -8  -1  173.70   12.31
   1   8   1  174.31   12.45
   1   8   1  166.57   10.93
   1   8   2  662.04   28.50
   1   8   2  628.67   28.81
  -1  -8  -2  646.97   28.89
   1   8   2  746.08   29.84
   1   8   2  643.63   25.83
  -1  -8  -2  620.36   25.94
  -1  -8  -2  688.47   28.99
   1   8   3  150.23   12.03
  -1  -8  -3  142.87   11.60
  -1  -8  -3  143.53   11.57
   1   8   3  162.13   11.81
   1   8   3  133.53   11.19
  -1  -8  -3  143.42    9.81
   1   8   3  132.58   11.02
   1   8   4  779.81   32.42
  -1  -8  -4  767.99   33.23
  -1  -8  -4  862.51   30.32
   1   8   4  779.37   32.91
   1   8   4  777.57   33.39
  -1  -8  -4  808.15   33.29
   1   8   5   11.46    3.63
  -1  -8  -5   10.39    2.99
  -1  -8  -5    8.58    2.95
   1   8   5   10.20    2.75
   1   8   5   14.98    3.68
   1   8   5    9.90    3.32
  -1  -8  -6 1202.56   39.32
   1   8   6 1169.99   43.52
   1   8   6 1115.41   42.68
  -1  -8  -6 1061.93   43.70
   1   8   6 1202.26   44.74
   1   8   7   26.82    5.09
   1   8   7   30.31    5.01
  -1  -8  -7   30.43    4.02
  -1  -8  -7   20.80    4.58
   1   8   7   28.29    5.14
   1   8   8  522.45   26.47
   1   8   8  554.70   25.95
  -1  -8  -8  557.42   22.24
  -1  -8  -8  572.98   28.37
   1   8   8  594.04   26.85
   1   8   9  143.88   11.59
  -1  -8  -9  126.84   12.03
   1   8   9  134.86   11.34
  -1  -8  -9  133.83    8.89
  -1  -8 -10   86.47    6.89
   1   8  10   71.42    8.17
  -1  -8 -10   62.92    8.71
   1   8  10   93.93    9.34
   1   8  11    2.46    1.69
   1   8  11    3.29    1.62
  -1  -8 -11    3.47    1.41
  -1  -8 -11    0.79    2.34
   1   8  12   64.58    7.75
  -1  -8 -12   74.25    6.45
  -1  -8 -12   70.68    9.62
   1   8  12   69.38    8.22
  -1  -8 -12   72.45    6.25
  -1  -8 -13  160.64    9.81
  -1  -8 -13  149.34   14.44
  -1  -8 -13  168.87   10.40
   1   8  13  162.65   13.16
   1   8  13  159.66   13.16
  -1  -8 -14   99.67   12.06
  -1  -8 -14   95.44    7.66
   1   8  14   89.89    9.97
  -1  -8 -14  106.49    7.87
   1   8  14  110.88   10.89
  -1  -8 -15   74.22    6.88
   1   8  15   88.06    9.81
  -1  -8 -15   78.65   10.90
   1   8  15   72.39    8.58
   1   8  15   92.96   10.06
   1   8  16  312.64   19.80
   1   8  16  300.86   18.57
  -1  -8 -16  268.62   14.45
  -1  -8 -16  261.58   20.97
   1   8  16  289.76   18.96
  -1  -8 -17   -2.64    2.60
   1   8  17   -1.13    2.13
   1   8  17   -1.61    2.30
  -1  -8 -18   57.35    9.82
   1   8  18   51.44    8.00
   1   8  18   56.40    7.70
   1   8  19   19.65    4.82
   1   8  19   29.35    6.31
  -1  -8 -19   27.29    6.78
   1   8  20  101.97   10.67
  -1  -8 -20   89.26   12.96
   1   8  20  101.00   12.95
   1   8  20   93.71   11.39
  -1  -9  16   45.19    9.43
  -1  -9  16   42.56    7.50
   1   9 -16   61.54    9.63
  -1  -9  16   52.04    8.36
   1   9 -16   64.18   10.35
  -1  -9  15  113.92   12.28
  -1  -9  15  141.81   16.52
  -1  -9  15  120.90   12.55
   1   9 -15  122.39   14.07
   1   9 -15  118.37   13.42
   1   9 -14   54.88    9.13
  -1  -9  14   62.58    8.70
  -1  -9  14   52.96    8.41
   1   9 -14   83.97   11.05
  -1  -9  14   57.04   10.04
  -1  -9  13  203.51   19.07
  -1  -9  13  215.74   16.77
   1   9 -13  221.74   17.90
  -1  -9  13  213.94   16.26
  -1  -9  13  196.01   12.65
   1   9 -13  205.93   17.67
  -1  -9  12    6.18    3.43
  -1  -9  12    1.44    1.04
  -1  -9  12    6.03    3.16
   1   9 -12    4.27    2.84
   1   9 -12    0.22    1.70
  -1  -9  12    5.32    3.07
  -1  -9  11  462.88   21.22
   1   9 -11  424.65   25.92
  -1  -9  11  393.18   23.33
  -1  -9  11  448.52   25.14
   1   9 -11  468.20   26.57
   1   9 -10   18.51    4.91
  -1  -9  10   22.22    4.13
  -1  -9  10   15.94    5.21
  -1  -9  10   16.29    3.42
  -1  -9  10   17.14    5.01
  -1  -9  10   14.44    4.15
   1   9 -10   20.59    5.15
  -1  -9   9  507.68   23.07
   1   9  -9  486.29   27.30
  -1  -9   9  544.53   27.60
  -1  -9   9  580.66   27.79
  -1  -9   9  540.02   24.17
   1   9  -9  563.85   28.76
  -1  -9   9  511.41   29.95
   1   9  -8    4.39    2.67
  -1  -9   8    5.03    2.18
   1   9  -8    6.35    2.88
  -1  -9   8    4.27    1.87
  -1  -9   8    7.57    3.66
   1   9  -7  128.30   12.10
  -1  -9   7  118.49   11.07
  -1  -9   7  124.85   13.03
  -1  -9   7  100.25    9.18
   1   9  -7  112.96   11.14
  -1  -9   6   21.24    5.48
   1   9  -6   26.55    5.33
  -1  -9   6   20.74    4.14
  -1  -9   6   18.09    4.37
   1   9  -6   26.99    5.30
   1   9  -5   28.11    5.43
  -1  -9   5   29.44    5.14
  -1  -9   5   28.99    4.98
   1   9  -5   38.47    6.53
  -1  -9   5   37.38    6.57
  -1  -9   4   44.91    5.91
   1   9  -4   37.31    5.92
  -1  -9   4   48.70    7.53
   1   9  -4   38.20    6.18
   1   9  -3  170.04   13.89
   1   9  -3  195.76   13.72
  -1  -9   3  191.27   13.29
  -1  -9   3  187.33   15.03
  -1  -9   2   86.01    9.77
   1   9  -2  108.35   10.38
  -1  -9   2   94.36    9.13
   1   9  -2   89.34    8.85
  -1  -9   1 1504.20   55.48
   1   9  -1 1656.93   58.31
  -1  -9   1 1706.01   57.50
  -1  -9   1 1690.59   59.72
   1   9  -1 1627.60   55.84
   1   9  -1 1701.14   60.31
  -1  -9   0   88.21    9.00
   1   9   0   85.62    9.15
  -1  -9   0   57.37    6.99
   1   9   0   87.00    8.22
   1   9   0   84.51    9.62
  -1  -9   0   83.93    9.32
   1   9   1  408.75   22.77
   1   9   1  351.30   20.66
  -1  -9  -1  418.74   22.56
   1   9   1  416.35   19.95
  -1  -9  -1  364.66   19.37
  -1  -9  -1  391.43   21.36
   1   9   2   20.38    4.44
  -1  -9  -2   24.95    4.40
   1   9   2   22.58    4.80
  -1  -9  -2   24.57    5.08
  -1  -9  -2   16.59    3.93
  -1  -9  -3  163.63   11.45
   1   9   3  167.67   13.65
  -1  -9  -3  167.85   13.43
  -1  -9  -3  173.27   13.63
   1   9   3  166.12   13.08
   1   9   4   59.59    7.98
   1   9   4   53.73    7.10
  -1  -9  -4   52.71    7.19
  -1  -9  -4   54.54    7.49
  -1  -9  -4   56.01    6.19
  -1  -9  -5   18.94    4.64
  -1  -9  -5   18.07    3.45
   1   9   5   22.90    4.59
   1   9   5   22.22    4.79
  -1  -9  -6   42.28    5.18
   1   9   6   44.68    6.70
  -1  -9  -6   36.23    6.46
   1   9   7  221.24   15.94
  -1  -9  -7  252.85   17.88
  -1  -9  -7  226.44   13.25
   1   9   7  261.66   16.69
   1   9   8   20.02    4.75
   1   9   8   15.76    4.04
  -1  -9  -8   16.24    3.21
  -1  -9  -8   13.22    3.81
   1   9   9  625.94   29.36
   1   9   9  589.73   28.34
  -1  -9  -9  556.57   23.58
  -1  -9  -9  587.77   30.63
   1   9  10  402.24   22.44
  -1  -9 -10  344.36   17.08
   1   9  10  399.32   22.06
  -1  -9 -10  375.68   23.58
   1   9  11   67.41    8.70
  -1  -9 -11   54.83    5.80
   1   9  11   72.66    8.75
  -1  -9 -11   65.67    9.59
  -1  -9 -12  514.18   29.42
   1   9  12  561.40   27.78
   1   9  12  565.02   27.37
  -1  -9 -13   11.22    4.21
   1   9  13   10.28    3.73
  -1  -9 -13    9.56    2.66
   1   9  13    9.36    3.16
  -1  -9 -14  194.21   17.79
   1   9  14  198.91   15.68
   1   9  14  197.77   15.82
  -1  -9 -14  202.35   12.16
   1   9  15  391.53   23.77
   1   9  15  408.48   23.69
  -1  -9 -15  382.00   26.37
  -1  -9 -15  368.96   18.06
   1   9  16    8.64    3.70
   1   9  16    2.95    2.82
   1   9  16    3.19    2.40
  -1  -9 -16    6.34    4.02
  -1  -9 -17  492.17   31.34
   1   9  17  504.77   26.94
   1   9  17  516.21   28.14
   1   9  17  478.17   27.61
   1   9  18   11.53    4.21
   1   9  18   22.19    5.23
  -1  -9 -18   21.19    6.31
   1   9  19  365.66   23.99
  -1  -9 -19  367.18   27.29
   1   9  19  361.33   22.51
  -1 -10  14   53.20    8.27
  -1 -10  14   63.41   11.44
   1  10 -14   47.48    8.82
   1  10 -14   65.74    9.92
   1  10 -13  153.79   15.28
   1  10 -13  158.03   16.62
  -1 -10  13  182.22   15.75
  -1 -10  13  156.33   17.28
  -1 -10  12  151.71   16.67
   1  10 -12  161.74   15.91
  -1 -10  12  159.16   14.32
   1  10 -12  147.04   14.74
   1  10 -11  168.21   15.82
  -1 -10  11  194.49   13.51
  -1 -10  11  201.54   16.45
   1  10 -11  221.66   18.00
  -1 -10  11  223.95   19.93
  -1 -10  10  150.90   15.99
   1  10 -10  145.21   14.35
  -1 -10  10  138.92   11.23
  -1 -10  10  124.86   12.50
   1  10 -10  126.06   13.54
   1  10  -9    5.34    2.96
  -1 -10   9    1.76    2.20
  -1 -10   9    7.91    2.76
  -1 -10   9    6.99    3.80
   1  10  -9   14.62    4.71
  -1 -10   8   32.15    6.10
  -1 -10   8   42.57    8.17
   1  10  -8   36.61    6.60
  -1 -10   8   33.00    5.45
   1  10  -8   35.65    6.69
  -1 -10   7    8.58    3.71
   1  10  -7    9.42    3.27
  -1 -10   7   22.35    5.17
   1  10  -7   23.42    5.60
  -1 -10   7   18.40    4.45
  -1 -10   6   95.19   11.61
   1  10  -6   79.99    9.90
  -1 -10   6   92.28   10.20
   1  10  -6  111.63   11.41
  -1 -10   6   84.60    8.89
   1  10  -5   24.75    5.67
  -1 -10   5   31.61    5.39
   1  10  -5   27.00    5.27
  -1 -10   4  480.94   27.13
   1  10  -4  416.36   23.38
  -1 -10   4  395.91   22.05
   1  10  -4  476.23   25.73
  -1 -10   3    1.88    1.88
  -1 -10   3   -2.51    2.18
   1  10  -3    3.85    2.37
   1  10  -3    3.67    2.04
  -1 -10   2  555.32   28.96
   1  10  -2  516.91   28.81
  -1 -10   2  489.34   25.47
   1  10  -2  525.73   25.83
   1  10  -2  512.40   27.27
   1  10  -1   98.54   10.59
   1  10  -1   87.22    9.02
  -1 -10   1   77.63    8.85
   1  10  -1   84.73   10.36
  -1 -10   1   96.35   10.71
   1  10   0  148.82   13.16
  -1 -10   0  167.42   14.36
  -1 -10   0  179.04   14.03
   1  10   0  143.34   11.81
  -1 -10  -1  115.77   11.56
  -1 -10  -1  119.97   12.00
   1  10   1  123.84   11.86
   1  10   1  108.13   11.70
   1  10   1  126.21   10.58
  -1 -10  -2   69.48    8.68
   1  10   2   93.24   10.57
   1  10   2   88.13    9.87
  -1 -10  -2   66.15    8.92
   1  10   3   33.36    6.06
  -1 -10  -3   38.08    6.63
   1  10   3   37.26    6.64
   1  10   4  173.54   14.07
  -1 -10  -4  137.99   12.67
  -1 -10  -4  132.74   10.89
  -1 -10  -4  152.32   13.73
   1  10   4  147.28   13.33
  -1 -10  -5   14.16    3.33
   1  10   5    6.71    2.85
  -1 -10  -5   11.59    4.15
   1  10   5    6.81    2.64
   1  10   6    3.78    2.69
  -1 -10  -6    5.64    2.97
  -1 -10  -6    7.07    2.26
   1  10   6   13.70    4.20
   1  10   7   31.90    6.09
   1  10   7   38.23    6.40
  -1 -10  -7   33.53    6.56
  -1 -10  -7   28.77    4.71
  -1 -10  -8   24.88    5.99
   1  10   8   16.87    4.20
   1  10   8   23.38    5.34
  -1 -10  -8   15.63    3.48
   1  10   9   89.03   10.17
  -1 -10  -9   89.68   11.47
   1  10   9   83.28   10.18
   1  10  10  153.09   13.66
  -1 -10 -10  153.28   15.20
   1  10  10  159.09   14.23
   1  10  11   65.73    8.78
  -1 -10 -11   74.22   10.79
   1  10  11   55.90    8.17
  -1 -10 -12  359.96   25.26
   1  10  12  420.29   24.15
   1  10  12  341.49   22.55
   1  10  13  238.25   17.84
  -1 -10 -13  197.41   18.15
  -1 -10 -13  191.06   12.37
   1  10  13  200.80   16.60
  -1 -10 -14   29.69    7.00
   1  10  14   36.91    7.21
   1  10  14   32.94    6.52
  -1 -10 -15    6.25    3.01
   1  10  15   10.61    3.93
   1  10  15    0.11    2.50
   1  10  16    2.68    2.96
   1  10  16    5.66    3.62
  -1 -10 -16    2.07    3.69
   1  10  17  130.98   13.68
   1  10  17  160.65   15.35
   1  10  17  127.72   13.14
  -1 -10 -17  149.61   16.53
  -1 -11  12  152.56   17.58
   1  11 -12  162.03   15.89
   1  11 -12  153.97   16.03
  -1 -11  12  182.52   16.40
  -1 -11  11   49.98    8.30
  -1 -11  11   54.20   10.04
   1  11 -11   32.96    7.00
   1  11 -11   53.96    8.87
   1  11 -10   25.31    6.23
  -1 -11  10   25.03    5.91
  -1 -11  10   23.04    6.53
   1  11 -10   19.62    5.49
  -1 -11   9  393.97   21.38
  -1 -11   9  353.02   23.34
  -1 -11   9  379.95   27.25
   1  11  -9  374.80   24.94
   1  11  -9  339.56   23.91
  -1 -11   8  264.41   21.97
  -1 -11   8  278.65   20.06
   1  11  -8  253.64   19.63
   1  11  -8  265.98   20.35
  -1 -11   8  252.63   16.84
  -1 -11   7 1209.60   53.68
   1  11  -7 1165.45   50.60
  -1 -11   7 1214.80   46.68
   1  11  -7 1199.21   50.21
   1  11  -6  198.87   16.96
  -1 -11   6  178.54   17.11
   1  11  -6  204.65   16.68
  -1 -11   6  157.66   13.28
   1  11  -5  369.38   23.71
  -1 -11   5  334.52   20.68
  -1 -11   5  385.92   25.51
   1  11  -5  353.97   22.29
  -1 -11   4   41.43    6.68
   1  11  -4   49.35    8.23
   1  11  -4   54.25    7.85
  -1 -11   4   48.14    8.15
   1  11  -3  111.22   12.46
   1  11  -3  153.53   15.20
  -1 -11   3  133.74   13.85
  -1 -11   3  145.04   12.82
   1  11  -3  123.06   12.15
  -1 -11   2  184.31   16.22
   1  11  -2  179.42   16.40
   1  11  -2  169.15   13.90
   1  11  -2  163.74   14.93
  -1 -11   2  183.98   14.74
  -1 -11   1    6.59    3.88
   1  11  -1    6.85    3.17
   1  11  -1    2.78    1.69
  -1 -11   1    4.21    2.07
   1  11   0   39.99    7.07
  -1 -11   0   43.18    7.12
   1  11   0   47.53    8.15
   1  11   0   42.30    6.51
  -1 -11   0   35.06    6.98
  -1 -11  -1  304.78   20.60
   1  11   1  336.51   22.75
   1  11   1  316.25   21.11
  -1 -11  -2   57.05    8.61
   1  11   2   67.38    9.18
  -1 -11  -2   57.52    8.65
   1  11   2   67.03    9.70
   1  11   3  342.43   21.94
  -1 -11  -3  326.83   22.10
   1  11   3  321.80   22.52
  -1 -11  -3  358.41   22.64
  -1 -11  -4   81.12   10.13
  -1 -11  -4  101.12   11.67
   1  11   4  101.07   11.68
   1  11   4  103.61   11.33
   1  11   5   28.26    5.75
  -1 -11  -5   31.85    6.40
   1  11   5   29.25    6.38
   1  11   6  183.06   15.78
   1  11   6  226.46   17.96
  -1 -11  -6  187.07   16.88
   1  11   7   87.61   11.10
   1  11   7  119.25   12.46
  -1 -11  -7  124.81   13.40
   1  11   8  250.92   18.98
  -1 -11  -8  226.81   19.22
   1  11   8  267.55   19.19
  -1 -11  -9   32.66    7.14
   1  11   9   24.55    5.86
   1  11   9   34.06    6.31
   1  11  10   42.80    7.51
   1  11  10   26.39    5.85
  -1 -11 -10   41.47    7.90
   1  11  11  130.24   13.41
  -1 -11 -11  107.99   13.73
   1  11  11  116.18   12.37
   1  11  12   15.50    4.49
  -1 -11 -12    9.76    4.74
   1  11  12    6.81    2.59
  -1 -11 -13    7.82    4.24
   1  11  13    3.23    3.00
   1  11  13    8.28    3.56
   1  11  14    9.85    4.24
   1  11  14   10.75    4.41
  -1 -11 -14    6.29    3.50
   1  11  15   21.46    5.60
   1  11  15   13.83    4.95
   1  12  -9  114.07   13.65
  -1 -12   9   97.75   13.61
   1  12  -9  122.10   14.09
  -1 -12   8   38.80    8.41
   1  12  -8   29.28    6.66
   1  12  -8   45.88    8.39
   1  12  -7   89.35   11.54
  -1 -12   7   95.64   10.67
   1  12  -7   78.16   10.82
  -1 -12   7   91.64   12.74
  -1 -12   6  294.50   23.55
  -1 -12   6  313.58   20.54
   1  12  -6  338.51   23.51
   1  12  -6  288.67   21.27
   1  12  -5  131.78   14.06
   1  12  -5  148.96   16.43
  -1 -12   5  132.66   15.18
   1  12  -5  158.18   14.83
  -1 -12   5  136.27   13.24
  -1 -12   4   63.92    9.06
   1  12  -4   76.19   10.68
  -1 -12   4   92.89   12.09
   1  12  -4   72.77   11.65
   1  12  -4   60.14    9.07
   1  12  -3   21.44    5.28
   1  12  -3   42.91    8.58
  -1 -12   3   31.47    7.27
   1  12  -3   28.74    6.23
  -1 -12   3   27.23    5.74
   1  12  -2   86.22   11.22
  -1 -12   2   86.69   10.92
   1  12  -2   74.95    9.21
  -1 -12   2  105.84   12.79
  -1 -12   1   17.15    5.26
   1  12  -1   14.54    4.89
  -1 -12   1   16.88    4.78
   1  12  -1   23.13    6.08
   1  12   0   26.84    6.61
  -1 -12   0   21.78    5.57
  -1 -12   0   30.06    6.31
   1  12   0   16.10    4.89
  -1 -12  -1  182.11   16.47
   1  12   1  171.06   15.96
  -1 -12  -1  200.96   17.42
   1  12   1  214.98   18.67
   1  12   2   22.68    5.46
  -1 -12  -2   27.17    6.47
   1  12   2   29.10    6.70
  -1 -12  -3   -0.73    2.74
   1  12   3    2.09    2.17
   1  12   3   -2.27    3.19
  -1 -12  -3   -0.44    2.11
   1  12   4   32.26    6.83
   1  12   4   17.01    5.44
  -1 -12  -4   34.96    7.04
  -1 -12  -4   15.79    4.96
   1  12   5    1.93    2.63
  -1 -12  -5    0.04    2.34
   1  12   5   -3.89    2.78
   1  12   6   55.97    9.30
   1  12   6   58.68    9.24
   1  12   7  184.27   16.92
  -1 -12  -7  178.82   17.37
   1  12   7  179.57   16.15
  -1 -12  -8   30.57    7.77
   1  12   8   21.33    5.80
   1  12   8   22.44    5.60
   1  12   9  166.92   15.87
  -1 -12  -9  185.66   18.01
   1  12   9  157.38   15.95
   1  12  10   60.41    9.33
   1  12  10   61.33    9.71
  -1 -12 -10   37.45    8.06
   1  12  11   55.90    9.19
   1  12  11   54.35    9.25
  -1 -12 -11   49.37    9.86
   1  13  -3  114.37   13.79
  -1 -13   3  122.10   14.75
   1  13  -3  106.64   13.87
  -1 -13   3  129.76   13.53
   1  13  -3  131.00   13.73
  -1 -13   2  129.17   15.08
   1  13  -2  106.97   13.09
   1  13  -2  101.08   13.61
  -1 -13   2  109.56   12.76
  -1 -13   1  138.60   14.30
   1  13  -1  141.72   15.10
  -1 -13   1  116.46   14.10
   1  13  -1  175.87   17.53
   1  13   0   23.28    6.98
  -1 -13   0   24.36    6.39
   1  13   0   21.51    5.63
  -1 -13   0   37.61    7.61
   1  13   1  603.02   35.65
   1  13   1  601.05   33.96
  -1 -13  -1  603.51   33.93
   1  13   2  210.95   18.70
  -1 -13  -2  205.43   18.56
   1  13   2  200.27   18.87
  -1 -13  -2  222.04   19.34
   1  13   3  210.36   18.68
  -1 -13  -3  207.02   18.33
   1  13   3  210.84   19.35
  -1 -13  -3  191.69   18.21
   1  13   4  233.67   20.75
   1  13   4  273.37   21.17
  -1 -13  -4  242.14   20.77
   1  13   5   12.13    5.11
  -1 -13  -5    8.12    3.89
   1  13   5   11.03    4.50
  -1 -13  -6   29.05    6.80
   1  13   6   34.23    7.45
   1  13   6   31.22    7.16
  -2  11   8    8.74    3.99
  -2  11   8   -1.93    2.50
   2 -11  -8    7.64    4.75
  -2  11   7   12.87    4.88
   2 -11  -7    4.78    3.23
  -2  11   7    4.08    3.06
  -2  11   6  246.26   19.60
  -2  11   6  252.10   21.48
   2 -11  -6  225.58   20.68
  -2  11   5   91.95   11.68
   2 -11  -5  121.01   14.40
  -2  11   5  104.09   13.74
  -2  11   4   29.22    6.91
  -2  11   4   20.41    5.32
   2 -11  -4   15.69    5.81
  -2  11   3  115.86   12.72
  -2  11   3  102.50   13.19
   2 -11  -3   76.52   11.37
  -2  11   2   24.94    6.73
  -2  11   2   18.53    5.20
   2 -11  -2   16.16    5.26
   2 -11  -1   61.21    8.38
   2 -11  -1   61.06    9.97
  -2  11   1   66.43    9.45
  -2  11   1   59.69    9.94
   2 -11   0   32.94    6.83
  -2  11   0   31.08    6.65
  -2  11   0   32.89    7.86
   2 -11   1   56.36    8.18
  -2  11  -1   73.53    9.74
  -2  11  -1   67.09   11.28
   2 -11   1   74.52   10.78
  -2  11  -2  272.32   20.26
   2 -11   2  317.38   23.21
  -2  11  -2  251.07   21.94
   2 -11   2  262.50   19.01
  -2  11  -3    0.09    1.96
  -2  11  -3    3.01    2.95
   2 -11   3   -1.07    2.48
   2 -11   3    3.47    2.65
   2 -11   4  528.98   31.56
  -2  11  -4  567.73   31.11
  -2  11  -4  581.55   35.14
   2 -11   4  582.65   31.12
  -2  11  -5   88.21   11.23
  -2  11  -5   69.56   11.41
   2 -11   5   68.71   10.08
   2 -11   5   74.18   10.26
   2 -11   6   36.48    7.51
   2 -11   6   28.76    6.80
  -2  11  -6   22.42    5.63
  -2  11  -6   17.35    5.21
  -2  11  -7  232.12   21.74
   2 -11   7  240.53   19.77
  -2  11  -7  254.89   19.45
   2 -11   7  230.47   19.42
   2 -11   7  236.04   20.43
  -2  11  -8    1.29    1.71
   2 -11   8    0.27    2.03
   2 -11   8    1.73    2.62
   2 -11   8   -2.56    3.24
   2 -11   8   -0.60    2.22
   2 -11   9  182.16   17.94
  -2  11  -9  210.52   17.75
   2 -11   9  190.40   17.43
  -2  11  -9  203.39   18.57
   2 -11   9  188.21   17.97
   2 -10 -12  124.83   15.16
  -2  10  12  150.46   15.11
  -2  10  12  151.03   16.09
   2 -10 -11  140.05   16.01
  -2  10  11  130.51   14.06
  -2  10  11  169.01   17.30
  -2  10  10  269.55   21.77
   2 -10 -10  287.64   23.16
  -2  10  10  251.61   19.97
  -2  10   9    9.02    3.91
  -2  10   9    7.92    4.12
   2 -10  -9    6.56    3.90
   2 -10  -8  362.72   26.01
  -2  10   8  392.41   24.59
  -2  10   8  349.28   25.29
  -2  10   7  226.44   19.45
  -2  10   7  197.97   16.97
   2 -10  -7  187.94   17.95
   2 -10  -6  260.09   21.11
  -2  10   6  256.46   19.28
  -2  10   6  268.30   21.36
   2 -10  -5  155.95   15.84
  -2  10   5  135.96   14.59
  -2  10   5  137.11   13.53
  -2  10   4    1.25    1.81
   2 -10  -4    5.46    3.71
  -2  10   4    9.11    4.65
   2 -10  -3  380.69   25.76
  -2  10   3  425.92   27.15
  -2  10   3  402.90   24.30
   2 -10  -2   16.56    4.30
  -2  10   2   17.11    4.67
   2 -10  -2   12.88    4.88
  -2  10   2   17.61    5.06
   2 -10  -1  227.62   15.87
  -2  10   1  224.07   17.33
  -2  10   1  216.51   18.70
   2 -10  -1  233.01   19.12
   2 -10   0   72.12   10.10
  -2  10   0   76.43    9.65
   2 -10   0   79.45    9.25
  -2  10   0   84.57   11.26
   2 -10   1    5.17    2.91
   2 -10   1    6.99    4.64
  -2  10  -1   11.49    5.00
  -2  10  -1    4.26    1.59
  -2  10  -2  440.65   25.46
  -2  10  -2  376.21   26.32
   2 -10   2  438.20   24.26
   2 -10   2  452.38   27.12
  -2  10  -3   67.70    9.30
   2 -10   3   58.53    8.18
   2 -10   3   71.81   10.13
  -2  10  -3   60.15    9.92
   2 -10   4  299.06   19.97
   2 -10   4  271.29   20.37
  -2  10  -4  273.70   19.62
  -2  10  -4  301.57   23.07
  -2  10  -5  126.41   12.59
   2 -10   5  130.12   13.55
   2 -10   5  126.04   12.81
   2 -10   5  120.47   13.25
   2 -10   5  152.70   14.55
   2 -10   6  155.67   14.99
   2 -10   6  175.69   16.15
   2 -10   6  176.47   15.45
   2 -10   6  155.14   15.28
  -2  10  -6  158.79   14.28
  -2  10  -7  433.61   25.31
  -2  10  -7  447.22   26.79
   2 -10   7  431.64   26.89
   2 -10   7  382.63   25.20
  -2  10  -7  363.31   26.79
   2 -10   7  384.35   24.91
   2 -10   7  398.21   25.27
   2 -10   8  383.19   25.45
  -2  10  -8  378.99   24.70
  -2  10  -8  348.88   22.55
   2 -10   8  334.51   23.48
  -2  10  -8  370.74   26.81
   2 -10   8  336.72   23.09
   2 -10   8  384.85   24.82
   2 -10   9  122.05   13.68
   2 -10   9  144.23   14.70
  -2  10  -9  148.06   16.47
  -2  10  -9  145.46   13.82
  -2  10  -9  121.21   13.59
   2 -10   9  139.51   14.44
   2 -10   9  133.61   13.68
   2 -10  10   74.94   10.93
  -2  10 -10   68.62   10.28
  -2  10 -10   57.71    8.67
   2 -10  10   71.02   10.85
   2 -10  10   84.44   11.11
   2 -10  10   65.38    9.52
   2 -10  11    9.04    4.20
  -2  10 -11    6.04    3.96
  -2  10 -11    5.00    2.81
   2 -10  11    6.27    3.83
   2 -10  11    6.52    2.95
   2 -10  11    8.09    4.23
  -2  10 -12   21.74    5.73
   2 -10  12   20.61    5.93
   2 -10  12   36.88    7.78
   2 -10  12   35.52    7.33
  -2  10 -12   32.81    6.58
   2 -10  12   24.10    5.65
  -2   9  15   98.73   13.11
   2  -9 -15   96.84   11.06
   2  -9 -15  101.32   13.87
  -2   9  14  104.07   13.26
   2  -9 -14  116.26   14.74
   2  -9 -14  100.92   11.09
   2  -9 -13  191.17   18.63
  -2   9  13  211.36   18.06
  -2   9  13  182.37   17.68
  -2   9  12   68.77    9.91
   2  -9 -12   92.08   12.58
  -2   9  12   60.20   10.13
   2  -9 -11   66.93   10.50
  -2   9  11   58.10    8.92
  -2   9  11   77.87   10.81
   2  -9 -10    4.69    3.55
  -2   9  10   11.76    4.38
  -2   9  10   12.37    4.60
  -2   9   9  312.02   22.49
  -2   9   9  289.72   20.45
   2  -9  -9  317.57   23.42
  -2   9   8   22.79    5.92
  -2   9   8   32.07    6.04
   2  -9  -8   35.54    7.26
  -2   9   7   27.31    5.85
  -2   9   7   29.05    6.53
   2  -9  -7   30.35    6.45
   2  -9  -6  684.92   35.83
  -2   9   6  708.72   35.99
  -2   9   6  702.92   33.51
   2  -9  -5    0.31    2.20
  -2   9   5    1.38    2.02
  -2   9   5    2.94    2.28
   2  -9  -4   22.08    5.37
  -2   9   4   35.07    7.05
  -2   9   4   32.45    6.05
  -2   9   4   21.01    4.14
  -2   9   3    2.53    1.82
  -2   9   3    0.94    1.80
  -2   9   3   -0.76    1.67
   2  -9  -3    0.85    2.56
   2  -9  -2    1.72    1.95
  -2   9   2   -0.47    2.14
   2  -9  -2    5.96    2.50
  -2   9   2    1.60    1.68
   2  -9  -1  108.55    9.76
  -2   9   1   99.50   10.50
   2  -9  -1   92.24   11.00
  -2   9   1   81.24   10.77
  -2   9   0    7.30    3.06
   2  -9   0    4.80    2.57
  -2   9   0    2.72    2.54
  -2   9  -1  254.15   17.67
   2  -9   1  269.55   19.06
  -2   9  -1  241.73   19.12
   2  -9   1  237.55   15.97
  -2   9  -2    4.03    3.88
   2  -9   2    4.83    2.26
  -2   9  -2    5.95    2.46
   2  -9   2    8.20    3.37
   2  -9   3   89.93   10.43
  -2   9  -3   94.61   10.19
   2  -9   3   79.51   10.16
  -2   9  -3  115.21   12.86
   2  -9   3   92.02    9.73
   2  -9   3   92.42   10.62
   2  -9   4    3.49    2.99
   2  -9   4    2.33    2.07
   2  -9   4    0.48    1.37
   2  -9   4    1.50    1.57
  -2   9  -4    6.09    2.47
  -2   9  -5  107.51   10.92
   2  -9   5  116.02   12.04
   2  -9   5  110.60   11.90
   2  -9   5  108.04   11.56
  -2   9  -6    0.89    1.58
   2  -9   6    2.99    2.05
  -2   9  -6    2.21    2.09
   2  -9   6    4.29    2.94
   2  -9   6    5.55    2.96
   2  -9   6    2.09    2.50
  -2   9  -6    3.28    2.39
   2  -9   7    2.57    2.46
  -2   9  -7    0.81    1.82
   2  -9   7    4.62    2.86
   2  -9   7   -1.22    2.30
  -2   9  -7    1.61    1.33
  -2   9  -7    3.68    2.58
   2  -9   7    1.96    2.77
  -2   9  -8   24.26    5.82
   2  -9   8   18.38    5.01
   2  -9   8   15.99    4.32
  -2   9  -8   16.61    4.73
   2  -9   8   28.81    5.94
   2  -9   8   21.66    5.36
  -2   9  -8   21.45    5.75
   2  -9   9   47.94    8.05
  -2   9  -9   46.80    7.22
  -2   9  -9   43.28    7.62
   2  -9   9   35.35    6.86
   2  -9   9   43.80    7.51
  -2   9 -10   35.49    6.43
  -2   9 -10   45.12    8.30
   2  -9  10   59.80    8.99
   2  -9  10   49.62    8.08
   2  -9  10   45.92    8.49
   2  -9  11    5.52    2.54
  -2   9 -11    6.18    3.00
  -2   9 -11    4.99    2.71
   2  -9  11    4.34    2.93
   2  -9  11    2.52    1.87
  -2   9 -12   14.74    4.23
   2  -9  12   16.17    4.83
   2  -9  12   24.93    6.36
  -2   9 -12   12.27    4.46
  -2   9 -13  123.35   12.57
  -2   9 -13  120.51   14.02
   2  -9  13  158.02   16.26
   2  -9  13  129.35   13.94
   2  -9  13  111.88   13.29
   2  -9  14   32.37    7.33
   2  -9  14   20.52    6.65
   2  -9  14   14.34    4.73
  -2   9 -14   27.27    6.04
  -2   9 -14   12.48    4.94
  -2   9 -15  113.96   12.02
   2  -9  15  112.83   13.60
   2  -9  15  115.35   13.53
   2  -9  15   91.34   12.67
  -2   9 -15  122.47   14.08
  -2   8  16    7.58    4.31
   2  -8 -16    9.56    3.58
   2  -8 -16    6.02    3.83
  -2   8  15  286.52   22.11
   2  -8 -15  259.87   18.27
   2  -8 -15  277.20   22.47
   2  -8 -14   67.17   10.82
   2  -8 -14   65.99    8.93
  -2   8  14   81.70   11.31
   2  -8 -13    2.41    2.39
  -2   8  13    2.30    2.26
  -2   8  13    5.62    2.86
   2  -8 -13    2.98    3.17
  -2   8  12  337.47   23.13
  -2   8  12  317.82   21.30
   2  -8 -12  325.84   23.56
   2  -8 -11  394.71   26.31
  -2   8  11  449.61   25.54
  -2   8  11  443.78   26.77
  -2   8  10  199.89   17.13
  -2   8  10  200.73   15.83
   2  -8 -10  206.90   17.92
  -2   8   9  475.05   27.00
  -2   8   9  406.71   21.74
   2  -8  -9  417.86   26.27
  -2   8   9  461.41   25.14
  -2   8   8  152.45   14.35
  -2   8   8  141.43   12.86
  -2   8   8  141.21   11.33
   2  -8  -8  166.65   15.10
   2  -8  -7   39.20    7.18
  -2   8   7   29.78    4.95
  -2   8   7   36.62    6.88
  -2   8   7   34.44    5.93
  -2   8   6  176.94   15.15
  -2   8   6  149.29   12.96
   2  -8  -6  154.16   14.44
  -2   8   6  152.88   11.49
  -2   8   5   85.25   10.32
  -2   8   5   91.99    9.80
   2  -8  -5   92.49   10.91
  -2   8   5   81.61    8.05
  -2   8   4  274.66   15.78
  -2   8   4  272.13   17.50
  -2   8   4  269.32   19.04
   2  -8  -4  268.93   19.08
  -2   8   3  328.50   19.58
   2  -8  -3  331.74   21.16
  -2   8   3  370.41   22.41
  -2   8   3  301.10   16.93
  -2   8   2  256.78   14.92
   2  -8  -2  270.26   15.10
  -2   8   2  224.08   15.72
   2  -8  -2  230.07   17.27
  -2   8   2  227.11   17.35
  -2   8   1  624.85   31.91
  -2   8   1  703.80   30.60
   2  -8  -1  626.71   31.28
   2  -8  -1  666.80   27.97
  -2   8   0    3.95    2.23
  -2   8   0    2.26    2.18
   2  -8   0   12.74    4.10
   2  -8   0   12.73    2.99
   2  -8   1  344.63   21.09
  -2   8  -1  342.26   19.66
   2  -8   1  399.67   21.23
  -2   8  -1  335.59   21.78
   2  -8   1  327.31   18.35
   2  -8   2  584.10   26.32
  -2   8  -2  582.41   27.04
  -2   8  -2  544.24   29.30
   2  -8   2  576.37   27.60
   2  -8   2  520.74   27.47
   2  -8   2  557.01   28.33
  -2   8  -3   19.88    4.34
   2  -8   3   18.77    4.38
   2  -8   3   28.14    5.33
   2  -8   3   14.59    4.29
   2  -8   3   18.48    4.54
   2  -8   4 1957.99   66.90
   2  -8   4 1923.31   68.55
   2  -8   4 1953.13   69.25
   2  -8   4 2076.93   68.84
  -2   8  -4 2010.27   67.25
  -2   8  -5  251.89   16.48
   2  -8   5  230.22   16.64
   2  -8   5  252.24   17.60
   2  -8   5  230.66   16.81
  -2   8  -5  275.70   19.50
   2  -8   5  258.81   17.12
  -2   8  -5  262.73   17.51
   2  -8   6  508.06   26.28
   2  -8   6  481.27   25.15
  -2   8  -6  430.75   26.19
  -2   8  -6  415.61   23.91
  -2   8  -6  435.46   23.24
   2  -8   6  445.47   24.08
   2  -8   7  192.19   14.88
  -2   8  -7  174.38   14.61
   2  -8   7  207.57   15.83
  -2   8  -7  178.79   13.68
   2  -8   7  179.22   14.55
  -2   8  -8  149.79   12.46
   2  -8   8  139.80   12.94
   2  -8   8  150.40   13.25
   2  -8   8  153.20   13.66
  -2   8  -8  137.77   12.89
   2  -8   9  688.78   33.01
  -2   8  -9  662.43   30.90
   2  -8   9  670.42   33.07
  -2   8  -9  705.70   33.59
  -2   8 -10    0.95    1.79
   2  -8  10    0.64    1.81
   2  -8  10    0.74    2.46
   2  -8  10   -1.84    2.56
  -2   8 -10    0.84    2.33
  -2   8 -11   86.38    9.69
   2  -8  11   87.37   10.97
   2  -8  11   93.18   10.93
   2  -8  11  104.43   11.27
  -2   8 -11   77.02   10.18
   2  -8  12    1.45    2.34
  -2   8 -12    5.55    3.26
   2  -8  12    4.14    2.41
   2  -8  12    3.77    2.50
  -2   8 -12    8.65    3.55
  -2   8 -13   16.06    4.14
   2  -8  13   16.73    5.27
   2  -8  13   18.53    5.10
   2  -8  13   16.65    5.01
  -2   8 -13   12.22    4.46
  -2   8 -14  295.87   21.69
   2  -8  14  275.92   21.00
   2  -8  14  338.86   22.36
  -2   8 -14  313.68   20.18
   2  -8  14  327.39   23.54
  -2   8 -15   43.19    7.17
   2  -8  15   38.57    7.36
   2  -8  15   53.03    9.12
  -2   8 -15   55.53    9.25
   2  -8  15   49.83    8.78
   2  -8  16  126.24   13.97
   2  -8  16  103.34   13.63
  -2   8 -16  130.60   14.36
  -2   8 -16  103.14   11.29
   2  -8  16   97.26   12.00
  -2   8 -17  261.43   21.36
  -2   8 -17  254.40   18.68
   2  -8  17  293.93   22.14
   2  -8  17  284.62   21.36
   2  -8  17  244.81   21.61
   2  -7 -18   19.33    5.78
  -2   7  18   11.81    4.23
   2  -7 -17   78.85   11.36
  -2   7  17   88.14   11.60
   2  -7 -17   69.44    8.85
   2  -7 -16   60.93    8.38
   2  -7 -16   65.14   10.32
  -2   7  16   70.08    7.39
  -2   7  16   65.38   10.09
  -2   7  15   20.18    4.11
   2  -7 -15   21.53    5.15
  -2   7  15   16.95    5.43
   2  -7 -15    9.35    4.29
   2  -7 -14  140.14   12.54
  -2   7  14  170.34   15.51
   2  -7 -14  134.17   14.47
   2  -7 -13   27.84    5.42
  -2   7  13   34.82    6.73
   2  -7 -13   26.56    5.99
   2  -7 -12   28.33    6.52
  -2   7  12   26.59    5.85
  -2   7  12   23.03    5.63
  -2   7  11    5.38    3.35
  -2   7  11    6.21    2.43
  -2   7  11    2.94    1.73
  -2   7  11    2.17    2.61
   2  -7 -11    0.52    1.98
  -2   7  10    9.47    2.60
  -2   7  10   10.79    3.66
  -2   7  10    7.68    3.12
   2  -7 -10   10.44    3.47
  -2   7  10    8.79    2.99
  -2   7   9 1053.14   40.79
  -2   7   9  995.20   42.05
   2  -7  -9  996.20   42.88
  -2   7   9  944.93   36.89
  -2   7   9  892.63   35.72
   2  -7  -8  177.69   14.98
  -2   7   8  174.44   14.59
  -2   7   8  189.66   13.87
  -2   7   8  166.28   11.78
  -2   7   8  165.13   11.78
  -2   7   7  451.82   21.42
  -2   7   7  487.09   23.99
   2  -7  -7  463.64   25.77
  -2   7   7  445.96   25.03
  -2   7   7  411.28   20.66
  -2   7   6    6.70    3.06
  -2   7   6    5.31    2.34
   2  -7  -6    5.51    3.02
   2  -7  -6   10.87    3.17
  -2   7   6    8.44    2.83
  -2   7   6   -0.07    0.96
  -2   7   5   65.29    8.43
   2  -7  -5   69.02    7.49
  -2   7   5   56.11    6.55
  -2   7   5   68.94    6.85
   2  -7  -5   52.35    7.70
  -2   7   5   66.75    7.64
  -2   7   4  122.96   10.56
   2  -7  -4  106.28    9.51
  -2   7   4  121.95    9.24
   2  -7  -4   98.30   10.44
  -2   7   4  119.50   11.53
  -2   7   3    8.27    2.27
  -2   7   3   13.38    4.08
  -2   7   3   12.42    3.27
   2  -7  -3   15.71    3.84
  -2   7   3   11.12    3.21
   2  -7  -3   10.27    2.88
   2  -7  -2   60.35    6.25
  -2   7   2   62.91    7.06
  -2   7   2   55.91    6.90
  -2   7   2   44.70    6.99
   2  -7  -2   56.34    7.46
   2  -7  -2   60.70    6.91
  -2   7   2   62.60    6.40
  -2   7   1  284.26   17.15
   2  -7  -1  297.73   18.77
   2  -7  -1  324.41   16.42
  -2   7   1  322.32   19.74
  -2   7   1  336.86   16.45
   2  -7  -1  324.87   18.00
  -2   7   0   54.21    6.57
   2  -7   0   49.54    6.51
   2  -7   0   52.15    5.94
   2  -7   0   37.74    6.35
  -2   7   0   52.61    7.49
   2  -7   1  997.24   36.04
  -2   7  -1 1030.28   41.16
   2  -7   1  937.24   38.33
   2  -7   1  925.92   37.00
  -2   7  -1  962.93   37.17
   2  -7   1  900.52   38.22
   2  -7   2  118.95    9.64
   2  -7   2  100.29    9.95
   2  -7   2  115.20    9.99
  -2   7  -2  102.66   10.73
   2  -7   2  105.06   10.22
  -2   7  -2  107.15    9.49
  -2   7  -3  379.21   19.49
   2  -7   3  333.72   19.80
   2  -7   3  391.85   20.37
   2  -7   3  356.73   18.73
   2  -7   3  336.87   19.06
   2  -7   3  363.13   20.48
  -2   7  -4   91.23    8.79
   2  -7   4   79.74    8.50
   2  -7   4   98.23    9.00
  -2   7  -4  106.28    9.87
  -2   7  -4   80.32    9.55
   2  -7   4   95.39    9.57
   2  -7   4   97.18    9.39
   2  -7   5  112.63   10.32
   2  -7   5  134.92   11.47
  -2   7  -5  116.16    9.90
  -2   7  -5  111.01   11.44
  -2   7  -5   97.12    9.91
   2  -7   5  120.31   10.40
  -2   7  -6   98.78    9.75
  -2   7  -6   78.80    8.28
   2  -7   6   93.28    9.43
   2  -7   6   81.80    9.05
   2  -7   6   97.13    9.51
  -2   7  -7  185.13   13.93
   2  -7   7  147.30   12.45
   2  -7   7  163.27   13.39
   2  -7   7  183.69   13.69
  -2   7  -7  178.78   12.67
  -2   7  -8   68.43    7.62
   2  -7   8   70.33    8.46
   2  -7   8   67.23    8.34
   2  -7   8   65.50    8.03
  -2   7  -8   66.00    8.25
  -2   7  -9  730.52   33.50
  -2   7  -9  713.63   31.10
   2  -7   9  722.45   32.70
   2  -7   9  749.18   33.71
   2  -7   9  722.40   33.21
   2  -7  10  177.15   14.11
   2  -7  10  180.33   14.84
   2  -7  10  179.27   14.76
  -2   7 -10  181.09   14.95
  -2   7 -10  181.66   13.34
  -2   7 -11  311.81   18.47
   2  -7  11  333.41   20.72
   2  -7  11  297.44   19.35
   2  -7  11  328.05   20.88
  -2   7 -12  327.48   19.00
   2  -7  12  301.14   20.57
   2  -7  12  278.89   19.47
   2  -7  12  307.89   19.82
  -2   7 -12  258.41   19.00
  -2   7 -13    3.89    2.11
   2  -7  13    5.73    3.07
   2  -7  13    3.76    2.25
   2  -7  13    1.68    1.31
  -2   7 -13    6.30    3.06
  -2   7 -14  176.77   15.43
   2  -7  14  185.95   15.98
   2  -7  14  159.73   14.33
   2  -7  14  147.86   14.85
  -2   7 -14  152.67   13.01
  -2   7 -15   18.87    4.43
   2  -7  15   26.21    6.11
  -2   7 -15   16.30    4.98
   2  -7  15   25.43    5.43
  -2   7 -16   86.79   10.02
   2  -7  16  107.21   13.03
   2  -7  16   99.32   11.41
  -2   7 -16   98.59   11.95
   2  -7  17  515.12   28.99
  -2   7 -17  479.04   29.52
   2  -7  17  518.77   29.95
  -2   7 -17  525.40   27.45
   2  -7  17  524.84   32.09
   2  -7  18    9.31    4.66
   2  -7  18    6.07    3.09
   2  -7  18   12.41    4.46
  -2   7 -18   10.73    4.56
  -2   7 -18    8.80    3.37
  -2   7 -19  152.98   14.26
  -2   7 -19  185.01   17.55
   2  -7  19  184.63   16.58
   2  -7  19  193.46   17.82
   2  -7  19  185.66   18.83
   2  -6 -19    2.83    3.07
   2  -6 -19    8.35    4.67
  -2   6  19    0.79    1.87
   2  -6 -18   86.31   10.18
  -2   6  18   75.40   10.80
   2  -6 -18   94.63   12.16
  -2   6  17  291.35   21.56
   2  -6 -17  288.35   18.93
   2  -6 -17  305.24   22.43
   2  -6 -16   30.66    6.84
   2  -6 -16   24.68    5.08
  -2   6  16   18.43    5.30
  -2   6  16   15.33    3.30
  -2   6  15  396.83   19.03
   2  -6 -15  411.24   25.78
   2  -6 -15  432.41   23.15
  -2   6  15  383.80   24.65
  -2   6  14   42.75    7.31
  -2   6  14   43.81    5.41
  -2   6  14   41.62    5.33
   2  -6 -14   51.79    8.32
   2  -6 -14   39.68    6.37
   2  -6 -13  321.51   21.53
   2  -6 -13  318.05   18.82
  -2   6  13  310.45   18.43
  -2   6  13  317.10   21.01
  -2   6  13  306.56   16.07
  -2   6  12   93.62    9.02
  -2   6  12   77.19    7.36
   2  -6 -12  105.59   10.02
   2  -6 -12   86.36   10.28
  -2   6  11   55.39    7.54
   2  -6 -11   59.56    8.53
  -2   6  11   60.79    8.47
  -2   6  11   56.04    6.74
  -2   6  11   61.54    6.44
  -2   6  10   34.44    5.10
   2  -6 -10   37.68    6.80
  -2   6  10   38.61    6.17
  -2   6  10   30.82    4.45
  -2   6  10   43.29    6.95
  -2   6   9   61.97    6.66
  -2   6   9   59.02    7.97
  -2   6   9   75.32    8.25
   2  -6  -9   68.73    8.48
  -2   6   9   55.34    6.09
   2  -6  -8  859.18   36.91
  -2   6   8  805.33   31.45
  -2   6   8  836.68   31.87
  -2   6   8  850.77   36.60
  -2   6   8  924.45   35.59
  -2   6   7  183.63   14.05
   2  -6  -7  191.65   14.40
  -2   6   7  174.26   11.24
  -2   6   7  189.54   11.69
   2  -6  -7  192.33   12.53
  -2   6   7  187.07   13.12
  -2   6   6  142.77    9.98
   2  -6  -6  142.91   12.35
   2  -6  -6  145.89   10.60
  -2   6   6  133.54   11.85
  -2   6   6  148.69   11.29
  -2   6   5   80.70    6.89
  -2   6   5   78.10    7.96
  -2   6   5   68.13    6.73
  -2   6   5   74.82    8.55
  -2   6   5   83.66    8.60
   2  -6  -5   84.09    7.88
   2  -6  -5   88.72    9.28
   2  -6  -4  200.26   14.38
   2  -6  -4  163.21   11.45
  -2   6   4  172.13   11.21
  -2   6   4  160.82   12.85
  -2   6   4  192.38   12.66
  -2   6   4  172.70   10.54
   2  -6  -4  183.43   12.63
   2  -6  -4  173.36   13.12
  -2   6   4  161.92   12.16
  -2   6   3  144.50   11.28
   2  -6  -3  161.34   11.64
  -2   6   3  159.13    9.82
  -2   6   3  119.58   11.02
   2  -6  -3  151.27   12.14
   2  -6  -3  136.00   10.35
  -2   6   3  160.15   11.34
  -2   6   2   67.97    6.07
   2  -6  -2   65.09    5.89
  -2   6   2   52.96    6.31
  -2   6   2   53.32    5.91
   2  -6  -2   67.43    7.86
   2  -6  -2   57.32    6.52
  -2   6   2   56.09    7.25
  -2   6   2   67.11    7.29
   2  -6  -2   61.19    6.90
   2  -6  -1  106.17    9.18
  -2   6   1  112.32    9.20
  -2   6   1  105.79    9.43
  -2   6   1  105.14    8.52
   2  -6  -1  111.28    9.03
  -2   6   1  107.10   10.11
   2  -6  -1  106.77    7.88
  -2   6   1  101.09    7.66
   2  -6  -1  116.12    9.31
   2  -6  -1  101.37    9.75
   2  -6   0  157.23   11.44
   2  -6   0  153.79   11.08
   2  -6   0  173.22   12.31
  -2   6   0  167.35   12.70
   2  -6   0  154.21   12.02
  -2   6   0  157.97   11.15
  -2   6   0  161.31   10.90
   2  -6   0  156.13   10.99
   2  -6   0  154.52    9.95
   2  -6   1   21.78    3.64
   2  -6   1   34.14    5.25
   2  -6   1   29.40    4.64
   2  -6   1   30.91    5.02
   2  -6   1   28.06    4.70
   2  -6   1   20.12    4.38
  -2   6  -1   26.57    4.42
  -2   6  -1   43.94    5.41
  -2   6  -1   26.54    5.17
  -2   6  -2  209.73   13.23
  -2   6  -2  216.70   13.31
   2  -6   2  225.29   13.77
   2  -6   2  227.62   13.92
   2  -6   2  233.76   14.66
   2  -6   2  212.26   13.67
   2  -6   2  235.51   13.18
  -2   6  -2  241.92   14.73
   2  -6   3  411.28   18.77
   2  -6   3  371.51   18.98
   2  -6   3  362.04   18.66
   2  -6   3  345.71   19.14
  -2   6  -3  361.83   20.45
  -2   6  -3  363.59   18.41
  -2   6  -3  378.60   19.53
   2  -6   3  379.35   19.31
  -2   6  -3  356.51   18.15
  -2   6  -3  375.52   19.19
  -2   6  -4  477.85   23.13
   2  -6   4  445.21   22.69
   2  -6   4  451.11   22.38
  -2   6  -4  494.14   24.90
   2  -6   4  523.46   22.74
  -2   6  -4  502.52   22.31
  -2   6  -4  564.11   24.28
   2  -6   4  478.36   22.28
  -2   6  -4  468.88   22.19
   2  -6   5  299.33   16.91
  -2   6  -5  286.31   16.68
  -2   6  -5  286.07   15.72
  -2   6  -5  311.86   17.37
   2  -6   5  259.05   16.20
  -2   6  -5  303.39   16.70
   2  -6   5  272.46   16.70
   2  -6   6 1385.17   48.63
  -2   6  -6 1402.86   49.60
   2  -6   6 1538.74   50.42
  -2   6  -6 1338.20   47.34
   2  -6   6 1339.75   49.41
   2  -6   6 1346.91   47.74
   2  -6   7   10.23    2.96
  -2   6  -7   17.58    3.57
   2  -6   7   16.56    4.04
   2  -6   7   12.22    3.04
  -2   6  -7   19.40    4.11
   2  -6   7    9.63    2.62
   2  -6   8  347.31   19.72
   2  -6   8  387.29   20.67
   2  -6   8  391.86   21.12
  -2   6  -8  389.96   19.47
   2  -6   8  401.50   19.85
  -2   6  -8  405.53   21.31
   2  -6   9  216.11   14.41
  -2   6  -9  191.16   14.20
  -2   6  -9  198.14   13.16
   2  -6   9  204.42   14.49
   2  -6   9  198.43   13.49
   2  -6   9  187.92   12.92
   2  -6   9  207.04   14.63
   2  -6  10    2.85    1.77
  -2   6 -10    6.36    3.13
   2  -6  10    5.25    2.39
   2  -6  10    2.70    1.96
  -2   6 -10   -0.81    1.42
   2  -6  10    4.24    2.24
  -2   6 -11  527.40   26.72
   2  -6  11  501.04   25.55
  -2   6 -11  557.45   24.94
   2  -6  11  481.00   23.86
   2  -6  11  518.72   25.00
   2  -6  11  530.54   27.10
   2  -6  12   25.88    4.96
   2  -6  12   32.03    6.04
  -2   6 -12   17.97    4.55
   2  -6  12   37.26    6.20
  -2   6 -12   21.50    4.20
  -2   6 -13  541.64   25.15
   2  -6  13  493.86   26.71
   2  -6  13  492.75   25.84
  -2   6 -13  523.83   27.50
   2  -6  14   76.42    9.42
  -2   6 -14   65.16    7.77
   2  -6  14   62.89    8.17
  -2   6 -14   77.73    9.56
  -2   6 -15  530.47   26.67
   2  -6  15  588.79   30.23
  -2   6 -15  640.88   31.59
   2  -6  15  586.32   29.35
  -2   6 -16  121.58   11.26
  -2   6 -16  134.62   13.34
   2  -6  16  126.55   12.49
   2  -6  16  124.14   12.67
   2  -6  17   97.59   11.28
  -2   6 -17  114.51   11.00
   2  -6  17  109.99   11.63
  -2   6 -17  117.76   12.88
   2  -6  18   16.97    5.15
   2  -6  18   18.25    4.99
  -2   6 -18   23.40    5.03
  -2   6 -18    9.13    3.21
   2  -6  19   17.11    4.98
   2  -6  19   16.12    4.58
  -2   6 -19   25.46    5.42
  -2   6 -19   28.44    6.86
   2  -6  20  177.89   16.69
  -2   6 -20  199.78   17.95
   2  -6  20  174.90   15.72
  -2   6 -20  182.13   15.09
   2  -5 -20   21.83    6.31
  -2   5  20    7.07    3.22
  -2   5  20    9.66    4.21
   2  -5 -20   11.59    3.96
  -2   5  19   42.62    8.37
   2  -5 -19   27.47    5.54
   2  -5 -19   17.75    5.57
  -2   5  19   41.97    7.40
  -2   5  18   39.79    7.59
   2  -5 -18   39.85    6.69
   2  -5 -18   30.47    6.57
   2  -5 -17  148.25   14.38
  -2   5  17  133.95   13.63
   2  -5 -17  131.22   12.12
  -2   5  17  119.20    8.61
   2  -5 -16    4.36    2.54
  -2   5  16    1.55    2.51
  -2   5  16    1.76    0.93
   2  -5 -16    2.28    2.13
  -2   5  15  161.67   10.52
   2  -5 -15  181.86   15.73
   2  -5 -15  192.16   14.12
  -2   5  15  187.86   11.09
  -2   5  15  211.78   16.68
  -2   5  14  201.67   11.76
   2  -5 -14  225.83   17.31
   2  -5 -14  227.62   15.47
  -2   5  14  226.66   12.41
  -2   5  14  248.22   17.63
  -2   5  13  153.43    9.93
   2  -5 -13  158.82   12.31
  -2   5  13  169.42   14.42
   2  -5 -13  189.98   15.13
  -2   5  13  155.74   10.02
   2  -5 -12   78.02    9.30
  -2   5  12   76.38    7.85
  -2   5  12   81.62    6.79
  -2   5  12   75.46    9.14
   2  -5 -12   61.20    7.41
   2  -5 -11   69.90    8.59
  -2   5  11   53.69    6.23
  -2   5  11   61.95    5.84
   2  -5 -11   53.01    6.62
  -2   5  11   52.81    7.27
  -2   5  10    5.94    1.88
  -2   5  10    9.14    2.90
   2  -5 -10    6.88    3.16
  -2   5  10    3.30    2.42
  -2   5   9  213.94   14.55
  -2   5   9  235.01   13.34
  -2   5   9  227.27   15.73
  -2   5   9  276.67   15.85
  -2   5   9  232.29   12.43
   2  -5  -9  282.19   17.42
  -2   5   8 1125.44   37.24
   2  -5  -8 1080.09   42.20
  -2   5   8 1077.03   42.12
  -2   5   8 1109.05   37.90
   2  -5  -8 1013.90   41.93
  -2   5   8 1023.65   40.29
  -2   5   7  474.45   23.03
  -2   5   7  448.93   18.62
   2  -5  -7  441.22   21.38
  -2   5   7  506.93   22.39
   2  -5  -7  430.62   22.24
   2  -5  -7  456.00   22.85
  -2   5   7  438.82   18.68
   2  -5  -6   24.51    4.28
  -2   5   6   24.73    3.57
  -2   5   6   24.48    4.28
  -2   5   6   29.60    4.66
  -2   5   6   30.08    5.17
   2  -5  -6   21.32    4.36
   2  -5  -6   27.53    4.88
  -2   5   6   24.49    3.51
  -2   5   5  631.46   23.46
   2  -5  -5  582.07   25.10
  -2   5   5  588.33   25.39
   2  -5  -5  569.63   26.12
  -2   5   5  600.14   22.54
   2  -5  -5  606.85   27.09
  -2   5   5  542.03   25.67
  -2   5   5  550.87   24.38
  -2   5   4  760.56   27.49
  -2   5   4  776.45   30.09
   2  -5  -4  830.43   30.25
   2  -5  -4  790.56   31.98
  -2   5   4  695.20   31.07
  -2   5   4  795.26   28.67
  -2   5   4  759.37   30.57
   2  -5  -4  894.14   31.92
   2  -5  -3  207.21   13.57
  -2   5   3  217.76   13.24
   2  -5  -3  234.63   14.90
   2  -5  -3  207.21   12.37
  -2   5   3  204.46   11.64
  -2   5   3  243.96   14.83
  -2   5   3  193.42   12.17
   2  -5  -3  223.66   13.15
  -2   5   3  223.34   11.17
   2  -5  -2  262.31   12.32
  -2   5   2  276.75   15.02
   2  -5  -2  250.33   14.22
  -2   5   2  250.45   13.97
  -2   5   2  276.52   12.61
   2  -5  -2  275.70   15.60
   2  -5  -2  248.59   13.37
  -2   5   2  242.38   15.26
   2  -5  -2  277.93   14.47
  -2   5   2  277.21   13.79
   2  -5  -1  625.60   22.51
   2  -5  -1  614.69   24.73
  -2   5   1  600.43   25.18
  -2   5   1  586.18   24.20
   2  -5  -1  581.78   23.89
  -2   5   1  662.58   22.83
   2  -5  -1  601.17   24.86
  -2   5   1  681.50   27.59
   2  -5  -1  553.43   25.31
  -2   5   1  564.80   23.41
  -2   5   0  777.35   27.70
   2  -5   0  717.30   27.34
   2  -5   0  726.54   29.20
   2  -5   0  709.73   27.74
  -2   5   0  706.47   27.33
  -2   5   0  748.81   25.66
  -2   5   0  687.36   29.35
   2  -5   0  679.74   27.35
   2  -5   0  686.89   28.18
   2  -5   0  687.33   25.33
   2  -5   1   15.21    3.12
  -2   5  -1   18.18    3.19
   2  -5   1   20.73    3.50
   2  -5   1   16.51    3.23
   2  -5   1   19.65    3.67
   2  -5   1   20.08    3.08
  -2   5  -1   17.89    3.65
  -2   5  -1   15.49    3.48
   2  -5   2    6.49    1.88
  -2   5  -2    9.29    2.32
  -2   5  -2    4.98    1.75
  -2   5  -2    5.41    1.99
   2  -5   2    7.40    2.53
   2  -5   2    5.95    1.92
   2  -5   2    6.61    1.91
   2  -5   2    8.25    2.32
   2  -5   3  259.28   13.83
  -2   5  -3  267.22   14.08
  -2   5  -3  262.95   13.73
   2  -5   3  261.41   13.42
   2  -5   3  233.92   13.52
  -2   5  -3  241.74   15.12
  -2   5  -3  248.61   14.36
   2  -5   3  270.87   14.99
  -2   5  -3  240.07   14.00
   2  -5   3  251.78   14.20
  -2   5  -4   17.17    3.10
  -2   5  -4   11.80    2.88
  -2   5  -4   13.86    3.23
   2  -5   4   12.61    2.73
  -2   5  -4   12.59    2.89
   2  -5   4   13.11    3.11
   2  -5   4   19.39    3.49
   2  -5   4   13.83    2.78
   2  -5   4   13.04    3.00
  -2   5  -5 1959.26   59.71
   2  -5   5 1781.85   58.35
  -2   5  -5 1835.51   59.98
   2  -5   5 1830.26   59.17
   2  -5   5 1844.61   60.28
   2  -5   5 1603.20   58.71
  -2   5  -5 1869.72   58.10
  -2   5  -5 2048.59   61.10
   2  -5   6   28.32    4.57
   2  -5   6   19.09    3.72
  -2   5  -6   22.80    3.85
   2  -5   6   25.57    4.04
   2  -5   6   24.48    4.18
  -2   5  -6   22.47    3.89
   2  -5   6   24.41    4.48
  -2   5  -6   24.47    4.33
  -2   5  -6   33.54    4.97
  -2   5  -7  874.44   31.58
  -2   5  -7  852.26   33.35
   2  -5   7  829.98   33.38
   2  -5   7  865.95   31.82
  -2   5  -7  812.16   33.11
   2  -5   7  844.98   33.50
  -2   5  -7  845.59   32.65
   2  -5   7  908.00   33.38
   2  -5   7  769.99   32.02
  -2   5  -8   72.08    7.82
   2  -5   8   78.08    7.65
  -2   5  -8   75.56    7.81
  -2   5  -8   71.41    6.86
   2  -5   8   85.37    8.25
   2  -5   8   79.47    8.45
   2  -5   8   80.14    8.07
   2  -5   8   74.80    7.18
  -2   5  -8   78.98    7.79
   2  -5   9  185.22   11.81
  -2   5  -9  187.84   13.12
   2  -5   9  181.51   12.55
   2  -5   9  190.60   13.23
   2  -5   9  220.75   13.30
  -2   5  -9  209.93   12.19
  -2   5  -9  182.87   12.49
   2  -5  10  246.25   14.21
   2  -5  10  250.08   15.24
   2  -5  10  222.52   14.94
  -2   5 -10  233.93   13.70
  -2   5 -10  259.12   15.98
   2  -5  10  225.06   14.38
   2  -5  11   50.19    6.48
   2  -5  11   71.26    8.13
  -2   5 -11   43.74    5.49
   2  -5  11   52.49    6.43
  -2   5 -11   49.63    6.83
   2  -5  12  225.57   15.82
  -2   5 -12  244.34   14.56
   2  -5  12  239.22   15.14
  -2   5 -12  262.61   16.91
   2  -5  13  139.48   11.53
   2  -5  13  166.47   13.29
  -2   5 -13  160.11   13.15
  -2   5 -13  142.61   10.92
   2  -5  14   33.06    6.12
   2  -5  14   32.63    5.65
  -2   5 -14   30.94    4.99
  -2   5 -14   28.75    5.44
  -2   5 -15  267.12   18.55
  -2   5 -15  254.17   15.85
   2  -5  15  237.04   17.35
  -2   5 -16  129.12   12.69
   2  -5  16  133.34   12.77
  -2   5 -16  147.28   11.80
   2  -5  17  119.53   12.28
  -2   5 -17  123.62   11.03
  -2   5 -17  129.92   12.80
   2  -5  18  407.77   24.76
  -2   5 -18  399.28   21.88
  -2   5 -18  362.62   24.02
   2  -5  19  119.70   13.22
  -2   5 -19  147.50   14.64
  -2   5 -19  140.74   12.35
   2  -5  19  142.59   13.39
   2  -5  20  134.97   13.92
  -2   5 -20  146.65   15.01
   2  -5  20  112.38   11.90
  -2   5 -20  115.60   11.62
  -2   5 -21  129.42   12.31
   2  -5  21  123.66   13.85
  -2   5 -21  130.76   14.10
   2  -5  21  112.90   12.30
  -2   4  21    0.95    2.89
   2  -4 -21    0.60    1.93
   2  -4 -21    5.22    3.31
  -2   4  21    0.46    2.11
  -2   4  20    2.94    2.35
   2  -4 -20    4.22    2.59
   2  -4 -20    7.09    2.99
  -2   4  20    4.94    3.32
   2  -4 -19  296.76   21.34
  -2   4  19  303.26   20.11
  -2   4  19  271.68   20.62
   2  -4 -19  299.27   19.76
  -2   4  18   63.93    8.70
   2  -4 -18   67.70    8.72
   2  -4 -18   56.36    8.42
  -2   4  18   78.94   10.08
  -2   4  17  360.71   22.84
  -2   4  17  308.18   19.92
   2  -4 -17  358.29   21.06
  -2   4  17  363.81   15.66
   2  -4 -17  320.12   21.72
  -2   4  16   69.47    9.44
   2  -4 -16   62.92    8.71
   2  -4 -16   62.24    7.97
  -2   4  16   67.92    5.75
   2  -4 -15   12.71    3.80
  -2   4  15    7.63    1.87
  -2   4  15   13.35    2.46
   2  -4 -15   16.08    4.19
   2  -4 -14  117.44   11.36
  -2   4  14   98.29    7.07
   2  -4 -14  110.16   10.07
  -2   4  14  110.15   11.05
  -2   4  14  101.23    7.07
  -2   4  13   53.06    7.37
   2  -4 -13   60.67    7.14
  -2   4  13   57.12    5.11
  -2   4  13   54.16    5.00
   2  -4 -13   64.81    8.17
  -2   4  12    8.08    2.90
  -2   4  12    1.39    0.89
   2  -4 -12    3.10    2.10
  -2   4  12    3.79    1.53
   2  -4 -12    5.94    2.35
  -2   4  11   15.44    4.37
  -2   4  11   12.01    2.24
   2  -4 -11   12.52    3.87
   2  -4 -11   10.41    3.00
  -2   4  11   23.81    4.64
  -2   4  10   33.43    5.22
   2  -4 -10   31.73    4.75
   2  -4 -10   45.28    6.78
  -2   4  10   38.81    4.23
  -2   4  10   36.12    5.81
   2  -4 -10   40.74    6.06
  -2   4   9 1669.09   48.22
   2  -4  -9 1500.95   52.47
  -2   4   9 1451.20   53.22
  -2   4   9 1672.11   53.27
  -2   4   9 1421.79   53.10
   2  -4  -9 1598.38   54.27
   2  -4  -9 1423.00   53.62
   2  -4  -8   44.92    6.29
  -2   4   8   53.66    5.27
   2  -4  -8   60.27    6.56
  -2   4   8   51.66    6.06
   2  -4  -8   43.40    6.04
  -2   4   8   54.11    4.82
  -2   4   8   60.97    7.11
  -2   4   7   47.41    5.44
   2  -4  -7   40.13    5.54
   2  -4  -7   54.79    6.00
  -2   4   7   42.86    5.31
  -2   4   7   47.75    6.23
  -2   4   7   43.65    4.32
   2  -4  -7   52.69    6.60
  -2   4   6  748.42   30.59
  -2   4   6  758.74   29.34
   2  -4  -6  769.70   29.64
  -2   4   6  713.03   28.70
   2  -4  -6  746.71   30.59
  -2   4   6  765.62   26.59
   2  -4  -6  806.53   31.44
  -2   4   6  790.73   26.66
  -2   4   5  438.27   17.32
   2  -4  -5  467.23   21.35
  -2   4   5  454.00   19.86
  -2   4   5  442.03   19.86
   2  -4  -5  484.49   20.64
   2  -4  -5  479.87   21.89
  -2   4   5  442.78   17.75
  -2   4   5  426.81   20.81
  -2   4   4  421.20   18.63
  -2   4   4  414.81   18.98
  -2   4   4  437.19   17.36
  -2   4   4  411.58   19.97
   2  -4  -4  362.89   19.35
   2  -4  -4  474.26   20.74
   2  -4  -4  413.98   18.80
  -2   4   4  456.98   16.77
  -2   4   3    9.96    2.83
   2  -4  -3   10.14    2.47
   2  -4  -3    7.68    2.44
  -2   4   3    9.36    2.12
  -2   4   3    8.08    2.39
  -2   4   3   12.14    2.24
  -2   4   3   12.46    1.98
   2  -4  -2  298.70   12.14
   2  -4  -2  287.12   13.49
  -2   4   2  306.97   14.84
   2  -4  -2  294.41   14.45
  -2   4   2  246.65   14.66
   2  -4  -2  254.29   14.77
  -2   4   2  292.84   12.21
   2  -4  -2  291.85   14.21
   2  -4  -2  284.26   15.26
  -2   4   2  330.24   13.91
  -2   4   2  308.35   14.41
  -2   4   1  244.20   11.58
  -2   4   1  194.44   11.53
   2  -4  -1  191.75   11.54
   2  -4  -1  212.21   11.17
   2  -4  -1  215.27   11.79
   2  -4  -1  216.29    9.90
   2  -4  -1  217.40   11.73
  -2   4   1  194.05   11.05
   2  -4  -1  205.38   12.38
  -2   4   1  208.19   12.62
  -2   4   1  215.65    9.72
  -2   4   0   19.47    2.63
  -2   4   0   17.98    3.59
  -2   4   0   19.46    3.38
   2  -4   0   20.56    3.36
   2  -4   0   18.93    3.05
   2  -4   0   16.52    2.75
   2  -4   0   19.06    2.57
  -2   4   0   14.95    2.61
   2  -4   0   19.92    3.15
  -2   4   0   22.13    3.14
  -2   4  -1 1597.85   53.85
   2  -4   1 1775.33   52.43
  -2   4  -1 1608.63   51.48
   2  -4   1 1636.88   51.72
  -2   4  -1 1658.18   52.78
   2  -4   1 1781.08   53.55
   2  -4   1 1595.68   49.85
   2  -4   1 1624.56   52.43
  -2   4  -1 1760.26   52.14
   2  -4   2   40.00    4.48
  -2   4  -2   45.87    4.64
  -2   4  -2   44.14    4.92
   2  -4   2   38.11    4.72
   2  -4   2   39.56    4.08
   2  -4   2   43.76    4.85
  -2   4  -2   53.94    5.14
   2  -4   2   46.97    4.81
   2  -4   3  232.77   11.66
   2  -4   3  232.42   12.41
  -2   4  -3  252.99   12.27
   2  -4   3  245.45   13.23
  -2   4  -3  241.88   13.81
  -2   4  -3  250.97   13.18
   2  -4   3  250.48   13.20
   2  -4   3  251.90   12.50
  -2   4  -3  282.90   13.27
   2  -4   4  226.39   11.80
   2  -4   4  245.27   12.73
  -2   4  -4  239.79   12.58
  -2   4  -4  236.84   11.85
  -2   4  -4  217.08   12.53
   2  -4   4  247.56   13.20
  -2   4  -4  229.03   12.85
   2  -4   4  236.64   12.08
  -2   4  -5  259.45   13.66
  -2   4  -5  233.46   13.18
  -2   4  -5  203.98   11.39
   2  -4   5  221.86   12.08
   2  -4   5  249.01   12.97
   2  -4   5  237.00   13.19
  -2   4  -5  215.71   12.30
   2  -4   6 1555.23   49.83
  -2   4  -6 1588.37   50.06
  -2   4  -6 1524.92   49.60
   2  -4   6 1388.43   48.88
  -2   4  -6 1489.06   47.36
   2  -4   6 1454.41   47.15
  -2   4  -6 1457.49   48.60
  -2   4  -7  787.82   30.69
  -2   4  -7  819.40   30.56
   2  -4   7  774.17   30.13
   2  -4   7  831.34   29.19
   2  -4   7  819.24   31.20
  -2   4  -7  806.67   30.93
   2  -4   7  842.98   31.44
  -2   4  -7  765.26   28.61
  -2   4  -8  344.81   16.07
   2  -4   8  367.02   18.24
   2  -4   8  317.74   16.76
   2  -4   8  359.08   18.14
   2  -4   8  337.73   16.97
  -2   4  -8  379.67   18.30
  -2   4  -8  360.83   17.48
  -2   4  -8  357.93   17.92
   2  -4   8  341.48   16.05
   2  -4   9  280.22   15.48
   2  -4   9  270.03   14.03
  -2   4  -9  273.14   15.55
  -2   4  -9  287.18   14.28
  -2   4  -9  308.04   15.90
   2  -4   9  272.82   15.84
  -2   4  -9  279.02   15.85
   2  -4   9  299.52   16.38
   2  -4   9  273.79   15.12
  -2   4 -10  105.12    8.17
   2  -4  10  120.68    9.39
  -2   4 -10  128.20   10.17
   2  -4  10  109.23    9.16
  -2   4 -10  120.76    9.93
   2  -4  10  131.67   10.44
  -2   4 -10  115.66    9.44
   2  -4  10  105.60    9.32
   2  -4  11 1951.49   63.94
   2  -4  11 2263.29   65.75
   2  -4  11 1948.04   62.29
  -2   4 -11 2116.35   63.73
  -2   4 -11 1949.93   60.51
  -2   4 -11 2004.00   63.93
   2  -4  11 2182.93   64.05
   2  -4  12  514.11   23.74
   2  -4  12  500.15   24.33
  -2   4 -12  492.11   24.26
   2  -4  12  491.50   23.23
  -2   4 -12  530.80   22.42
   2  -4  13 1745.15   57.41
   2  -4  13 1543.80   56.08
  -2   4 -13 1735.57   55.26
  -2   4 -13 1651.42   58.09
   2  -4  13 1661.96   58.24
   2  -4  14  183.00   13.83
  -2   4 -14  186.93   14.09
   2  -4  14  194.94   13.52
   2  -4  14  171.18   12.78
  -2   4 -14  167.66   11.66
  -2   4 -15  457.29   24.58
   2  -4  15  492.52   24.34
   2  -4  15  450.66   23.86
   2  -4  15  509.33   25.75
  -2   4 -15  529.63   23.44
   2  -4  16  233.72   16.04
   2  -4  16  266.95   17.98
  -2   4 -16  244.94   17.26
   2  -4  17   81.12    9.85
   2  -4  17   72.83    8.35
  -2   4 -17   71.55    7.81
  -2   4 -17   70.93    8.93
  -2   4 -18   18.28    4.77
  -2   4 -18   30.65    5.32
   2  -4  18   16.71    4.39
   2  -4  18   26.00    5.15
  -2   4 -19   32.40    6.34
   2  -4  19   35.92    6.21
   2  -4  19   24.24    5.77
  -2   4 -19   38.30    6.10
   2  -4  20  129.65   12.08
  -2   4 -20  102.81   10.40
   2  -4  20  112.04   12.23
  -2   4 -20  108.82   12.07
   2  -4  21  697.06   35.39
  -2   4 -21  656.83   34.37
   2  -4  21  670.89   32.68
  -2   4 -21  651.50   30.95
  -2   4 -22    6.97    4.12
   2  -4  22    4.74    3.06
  -2   4 -22    0.63    2.04
   2  -4  22    5.52    2.40
  -2   3  22   58.80    9.61
  -2   3  22   75.85    9.93
   2  -3 -22   69.09    9.77
   2  -3 -22   74.22   10.33
  -2   3  21  138.00   13.29
  -2   3  21  160.69   15.88
   2  -3 -21  143.86   13.72
  -2   3  20   10.52    3.84
   2  -3 -20   -0.52    2.59
   2  -3 -20   13.76    4.95
  -2   3  20    9.73    3.91
   2  -3 -19  244.27   18.51
  -2   3  19  269.66   18.24
   2  -3 -19  252.45   18.04
  -2   3  19  267.60   19.89
   2  -3 -18   21.53    5.04
  -2   3  18   19.60    2.92
  -2   3  18   33.24    7.00
   2  -3 -18   30.94    5.78
  -2   3  18   17.20    4.32
   2  -3 -17  152.31   13.43
  -2   3  17  134.19    7.91
  -2   3  17  134.25   13.24
   2  -3 -17  162.08   13.25
  -2   3  17  140.46   12.15
   2  -3 -16   22.06    4.70
  -2   3  16   11.19    2.22
  -2   3  16   12.09    3.71
   2  -3 -16   17.60    4.34
  -2   3  16   11.96    3.51
  -2   3  15   69.53    8.86
  -2   3  15   62.34    5.04
   2  -3 -15   58.56    7.34
   2  -3 -15   67.83    8.22
  -2   3  14  238.35   11.37
   2  -3 -14  253.10   16.58
   2  -3 -13  315.00   18.33
  -2   3  13  303.40   18.56
  -2   3  13  300.14   12.73
   2  -3 -13  298.33   17.08
  -2   3  13  292.08   12.67
  -2   3  13  283.62   17.74
  -2   3  12   78.45    5.38
   2  -3 -12   64.19    7.57
   2  -3 -12   72.66    7.67
  -2   3  12   74.37    5.32
  -2   3  12   86.27    8.80
  -2   3  12   69.46    8.10
   2  -3 -11  337.05   18.42
  -2   3  11  385.35   14.78
   2  -3 -11  363.09   19.29
  -2   3  11  381.90   20.60
   2  -3 -11  356.27   20.16
   2  -3 -11  339.99   18.25
  -2   3  11  376.07   19.67
  -2   3  11  364.14   14.54
   2  -3 -10  112.71   10.15
  -2   3  10  118.80   10.00
  -2   3  10  120.83    6.86
  -2   3  10   94.13    9.16
   2  -3 -10  104.48    8.92
   2  -3 -10  120.04    9.56
   2  -3 -10  128.67   10.18
   2  -3  -9 1468.62   50.53
  -2   3   9 1475.15   44.45
   2  -3  -9 1418.70   49.06
  -2   3   9 1532.27   51.10
  -2   3   9 1514.00   51.36
   2  -3  -9 1598.68   50.53
   2  -3  -9 1416.03   51.32
   2  -3  -8   84.08    7.79
  -2   3   8   80.34    5.37
  -2   3   8   83.57    8.04
   2  -3  -8   86.68    7.57
  -2   3   8   83.95    7.80
   2  -3  -8   64.76    7.23
   2  -3  -7   61.38    6.49
  -2   3   7   82.06    5.27
  -2   3   7   72.17    6.76
  -2   3   7   71.00    6.99
  -2   3   7   66.91    6.92
   2  -3  -7   69.81    7.15
   2  -3  -7   75.04    6.87
  -2   3   6   73.22    6.54
   2  -3  -6   95.08    8.17
   2  -3  -6   92.09    7.44
  -2   3   6   92.87    5.77
  -2   3   6  102.95    8.25
  -2   3   6   89.22    7.09
   2  -3  -6   85.37    7.56
  -2   3   5  293.60   11.84
   2  -3  -5  269.27   13.66
  -2   3   5  263.71   13.41
   2  -3  -5  298.27   15.30
  -2   3   5  280.14   13.68
   2  -3  -5  259.24   14.06
  -2   3   5  275.85   14.61
  -2   3   5  270.81   11.55
  -2   3   4 1170.89   36.52
  -2   3   4 1179.92   39.36
  -2   3   4 1197.65   37.10
  -2   3   4 1238.64   39.75
   2  -3  -4 1312.28   41.52
  -2   3   4 1224.39   41.42
   2  -3  -4 1212.92   41.50
   2  -3  -4 1231.51   39.88
  -2   3   3 1580.11   53.29
  -2   3   3 1671.80   49.85
   2  -3  -3 1830.59   53.99
  -2   3   3 1705.77   48.90
   2  -3  -3 1784.69   54.38
   2  -3  -3 1659.62   51.97
  -2   3   3 1827.41   52.41
   2  -3  -3 1592.33   49.75
  -2   3   3 1626.86   51.85
  -2   3   2   29.83    2.72
  -2   3   2   29.98    3.55
  -2   3   2   31.02    3.23
   2  -3  -2   32.27    3.84
   2  -3  -2   37.02    4.73
   2  -3  -2   32.18    3.39
  -2   3   2   34.56    3.96
  -2   3   2   23.09    3.52
   2  -3  -2   38.55    4.58
   2  -3  -1  150.81    6.71
   2  -3  -1  133.60    8.12
  -2   3   1  141.90    7.79
  -2   3   1  136.67    8.15
   2  -3  -1  134.82    7.76
  -2   3   1  140.98    8.59
   2  -3  -1  149.91    8.86
  -2   3   1  135.68    9.14
   2  -3  -1  173.84    9.28
  -2   3   1  138.23    6.63
   2  -3   0  640.89   22.02
   2  -3   0  608.82   19.56
   2  -3   0  589.71   22.16
   2  -3   0  565.94   21.87
  -2   3   0  571.98   22.97
  -2   3   0  597.06   21.39
  -2   3   0  579.91   21.08
   2  -3   0  584.05   21.11
   2  -3   1 4905.94  140.53
   2  -3   1 5087.72  138.71
   2  -3   1 4747.22  140.42
  -2   3  -1 5677.32  142.67
   2  -3   1 4920.83  141.36
  -2   3  -1 5577.06  141.37
   2  -3   1 5005.58  141.73
  -2   3  -1 5084.48  143.03
  -2   3  -1 4957.27  140.31
   2  -3   2 1953.99   55.66
   2  -3   2 1666.30   53.77
  -2   3  -2 1762.24   53.39
   2  -3   2 1766.52   52.50
   2  -3   2 1783.34   54.99
  -2   3  -2 1774.57   54.19
  -2   3  -2 2005.53   55.84
   2  -3   2 1801.39   53.73
   2  -3   3   48.26    4.59
  -2   3  -3   41.77    4.48
   2  -3   3   47.88    4.77
  -2   3  -3   48.31    4.53
   2  -3   3   44.36    4.17
   2  -3   3   36.33    4.26
  -2   3  -3   45.08    4.71
   2  -3   3   37.26    3.61
  -2   3  -3   44.21    4.04
   2  -3   4 2163.74   65.40
  -2   3  -4 2143.19   64.00
  -2   3  -4 2220.23   66.27
   2  -3   4 2073.66   65.84
  -2   3  -4 2692.50   67.19
  -2   3  -4 1790.00   64.66
   2  -3   4 2424.95   66.97
   2  -3   4 2275.40   64.51
   2  -3   5 1526.72   52.11
  -2   3  -5 1656.68   52.07
   2  -3   5 1618.23   51.87
   2  -3   5 1664.49   52.64
  -2   3  -5 1762.27   53.01
   2  -3   5 1685.09   50.64
  -2   3  -5 1668.27   50.47
   2  -3   6  990.05   32.78
  -2   3  -6 1151.59   35.57
   2  -3   6  976.22   35.03
  -2   3  -6  955.35   32.59
  -2   3  -6 1092.05   35.65
   2  -3   6 1081.36   35.53
  -2   3  -6  978.04   34.79
   2  -3   6  951.05   34.32
  -2   3  -7  120.44    7.64
   2  -3   7  155.41    9.62
   2  -3   7  137.27    9.14
  -2   3  -7  127.94    9.04
   2  -3   7  131.56    9.31
  -2   3  -7  143.66    9.21
   2  -3   7  129.66    9.12
   2  -3   7  135.27    8.03
  -2   3  -8   13.56    3.04
  -2   3  -8   13.05    2.35
   2  -3   8   16.14    3.06
  -2   3  -8   15.65    3.16
   2  -3   8   15.72    2.83
  -2   3  -8   15.81    3.21
   2  -3   8   16.25    3.26
   2  -3   8   15.39    2.59
   2  -3   9  164.59   10.36
  -2   3  -9  131.96    9.46
   2  -3   9  120.36    9.50
  -2   3  -9  132.40    9.77
   2  -3   9  143.24   10.06
  -2   3  -9  143.06   10.08
   2  -3   9  146.71    9.81
  -2   3  -9  137.67    8.47
   2  -3  10  412.23   19.05
   2  -3  10  371.84   19.04
   2  -3  10  423.81   19.81
  -2   3 -10  422.93   19.19
  -2   3 -10  405.67   19.44
   2  -3  10  378.87   18.47
  -2   3 -10  407.33   17.32
   2  -3  11  453.45   20.52
  -2   3 -11  433.37   20.86
  -2   3 -11  412.97   18.30
   2  -3  11  426.26   20.89
  -2   3 -11  450.19   20.57
   2  -3  11  421.40   20.66
  -2   3 -11  452.86   21.27
   2  -3  11  449.63   20.60
  -2   3 -12    7.07    1.91
  -2   3 -12    5.83    2.36
   2  -3  12    9.04    2.66
   2  -3  12    6.79    2.13
  -2   3 -12    9.18    2.73
  -2   3 -12    6.63    2.33
  -2   3 -12   13.01    3.39
   2  -3  12    4.95    1.94
   2  -3  12    6.16    1.67
  -2   3 -13   86.83    8.62
   2  -3  13   75.12    7.54
  -2   3 -13   84.38    8.34
   2  -3  13   95.61    9.20
   2  -3  13   74.79    8.18
  -2   3 -13   89.48    8.36
   2  -3  13   81.88    7.95
  -2   3 -13   93.49    7.67
   2  -3  14  207.25   14.53
  -2   3 -14  217.62   14.45
   2  -3  14  233.14   14.47
   2  -3  14  197.86   13.74
  -2   3 -14  201.40   12.32
   2  -3  15  802.03   34.08
   2  -3  15  783.67   32.18
  -2   3 -15  780.38   33.24
   2  -3  15  741.67   31.98
  -2   3 -15  780.26   30.35
   2  -3  16  453.57   23.00
   2  -3  16  491.19   25.35
  -2   3 -16  473.78   24.22
  -2   3 -16  501.25   22.29
   2  -3  16  425.99   22.89
   2  -3  17   19.26    4.56
  -2   3 -17    6.40    3.03
   2  -3  17   14.11    3.70
  -2   3 -17   14.60    3.42
   2  -3  18  581.01   30.25
   2  -3  18  638.58   29.20
  -2   3 -18  621.59   27.60
  -2   3 -18  669.62   31.10
   2  -3  19   24.91    5.07
   2  -3  19   31.30    6.28
  -2   3 -19   24.66    5.42
  -2   3 -19   24.70    4.75
   2  -3  20   10.11    3.88
  -2   3 -20    4.67    1.88
  -2   3 -20    6.17    2.40
   2  -3  21    2.93    2.30
  -2   3 -21    1.01    1.68
   2  -3  21    3.28    2.30
  -2   3 -21    7.04    2.75
   2  -3  22   19.28    5.25
   2  -3  22   12.06    4.71
  -2   3 -22   18.42    4.73
  -2   3 -22   24.61    5.78
   2  -3  23    6.93    3.84
  -2   3 -23    2.71    3.08
   2  -3  23    4.69    2.90
  -2   3 -23    2.42    2.38
  -2   2  22   24.67    5.75
  -2   2  22   23.25    6.48
   2  -2 -22   32.06    6.65
   2  -2 -22   25.51    5.87
  -2   2  21   29.55    6.76
   2  -2 -21   21.65    5.24
  -2   2  21   28.00    5.63
   2  -2 -21   34.80    6.59
   2  -2 -20  157.35   14.02
  -2   2  20  131.53   14.03
  -2   2  20  141.63   12.84
   2  -2 -20  142.57   13.32
  -2   2  19   29.11    5.40
  -2   2  19   14.69    4.19
   2  -2 -19   21.48    5.00
  -2   2  18  110.09    6.58
   2  -2 -18  105.32   10.93
  -2   2  18  124.47   12.68
   2  -2 -18  121.95   11.60
  -2   2  18  116.32   10.75
  -2   2  17    0.86    1.05
   2  -2 -17    1.69    2.14
   2  -2 -17    0.48    1.19
  -2   2  17    1.32    2.31
  -2   2  17    1.12    0.79
   2  -2 -16  410.43   22.56
   2  -2 -16  422.85   22.96
  -2   2  16  459.18   24.94
  -2   2  16  442.26   22.06
  -2   2  16  437.38   16.21
  -2   2  15  166.06   13.06
  -2   2  15  193.84    9.01
   2  -2 -15  182.30   13.63
   2  -2 -15  205.70   14.21
  -2   2  15  187.20   12.97
  -2   2  15  194.55   14.99
   2  -2 -14   32.42    5.27
  -2   2  14   22.83    4.85
  -2   2  14   31.71    5.15
  -2   2  14   37.84    5.35
  -2   2  14   34.63    3.24
   2  -2 -14   31.13    5.24
  -2   2  13  405.85   20.35
  -2   2  13  376.29   20.64
   2  -2 -13  389.05   19.69
   2  -2 -13  411.94   20.28
  -2   2  13  327.09   13.42
   2  -2 -12   10.32    3.14
   2  -2 -12    9.46    2.72
   2  -2 -12    7.97    2.58
  -2   2  12   16.51    3.46
  -2   2  12    9.99    3.20
  -2   2  12   13.77    2.07
   2  -2 -12   11.48    2.97
  -2   2  11  273.47   15.84
   2  -2 -11  293.74   17.53
   2  -2 -11  286.32   16.01
   2  -2 -11  314.01   16.48
  -2   2  11  287.78   16.83
   2  -2 -11  326.27   16.90
  -2   2  11  302.88   11.56
  -2   2  10  697.30   28.39
  -2   2  10  677.59   27.31
   2  -2 -10  651.65   26.86
  -2   2  10  673.29   21.42
   2  -2 -10  663.50   26.98
   2  -2 -10  665.53   26.88
   2  -2 -10  617.59   27.99
   2  -2  -9  215.91   12.76
  -2   2   9  210.59    8.67
  -2   2   9  208.22   12.47
   2  -2  -9  201.01   12.07
   2  -2  -9  209.60   12.48
   2  -2  -9  224.82   13.79
  -2   2   9  196.44   12.83
  -2   2   9  209.41    8.67
  -2   2   8  167.16   10.65
   2  -2  -8  168.56   11.33
   2  -2  -8  147.56   10.06
  -2   2   8  173.55   11.24
  -2   2   8  177.41    7.45
   2  -2  -8  152.02   10.12
   2  -2  -8  176.70   10.84
  -2   2   7  128.40    6.18
  -2   2   7  119.75    9.00
   2  -2  -7  138.08    9.20
   2  -2  -7  140.13    9.16
   2  -2  -7  118.56    9.16
  -2   2   7  134.86    9.10
   2  -2  -7  130.98    8.78
   2  -2  -6    3.75    1.97
  -2   2   6    5.52    1.09
   2  -2  -6    4.78    1.71
   2  -2  -6    3.56    1.37
  -2   2   6    7.32    1.83
  -2   2   6    2.95    1.38
  -2   2   5  212.66   11.27
   2  -2  -5  234.87   12.65
  -2   2   5  226.47   12.30
  -2   2   5  231.45    9.13
   2  -2  -5  250.79   11.93
   2  -2  -5  224.03   11.92
   2  -2  -4  518.26   20.22
   2  -2  -4  508.71   19.46
   2  -2  -4  491.25   20.46
  -2   2   4  528.80   20.97
  -2   2   4  482.55   19.21
  -2   2   4  501.60   18.96
  -2   2   4  539.30   17.16
  -2   2   3  226.77    8.79
  -2   2   3  202.68   10.06
   2  -2  -3  214.69   10.32
   2  -2  -3  227.29    8.86
  -2   2   3  211.98   10.04
   2  -2  -3  205.34   10.69
   2  -2  -3  210.64   11.22
  -2   2   2    1.56    0.72
   2  -2  -2    0.46    0.73
  -2   2   2   -0.56    0.74
  -2   2   2    2.30    0.88
   2  -2  -2    2.56    1.00
   2  -2  -2    0.82    0.65
   2  -2  -2    0.75    0.90
  -2   2   2    4.10    1.51
  -2   2   2    2.16    0.52
   2  -2  -1 1898.57   52.33
   2  -2  -1 1831.35   51.02
  -2   2   1 1803.07   48.65
   2  -2  -1 1714.50   52.05
  -2   2   1 1707.90   50.75
  -2   2   1 1770.68   52.17
  -2   2   1 1701.57   51.64
  -2   2   1 1676.46   53.16
   2  -2  -1 1699.82   53.38
   2  -2   0 1151.67   32.61
   2  -2   0 1122.80   34.75
   2  -2   0 1158.60   35.20
  -2   2   0 1161.57   35.13
  -2   2   0 1172.54   34.94
  -2   2   0 1102.26   36.66
   2  -2   0 1164.04   35.93
   2  -2   1  625.43   21.71
   2  -2   1  663.51   21.66
  -2   2  -1  722.55   23.06
   2  -2   1  642.49   22.56
  -2   2  -1  628.88   23.18
  -2   2  -1  681.55   22.07
   2  -2   1  694.25   20.21
  -2   2  -1  662.57   21.60
   2  -2   2  556.70   19.03
  -2   2  -2  492.46   18.52
   2  -2   2  497.07   17.85
  -2   2  -2  601.24   19.95
  -2   2  -2  513.81   17.87
   2  -2   2  547.94   19.63
   2  -2   3 2518.05   67.57
  -2   2  -3 2297.01   68.45
  -2   2  -3 2319.04   66.96
  -2   2  -3 2644.31   69.89
   2  -2   3 2356.13   69.12
   2  -2   3 2594.04   69.72
   2  -2   3 2275.58   68.39
  -2   2  -3 2123.42   68.57
  -2   2  -4  112.10    5.95
  -2   2  -4   99.78    6.82
  -2   2  -4  111.31    7.15
   2  -2   4  101.93    6.80
  -2   2  -4  111.13    6.92
   2  -2   4  104.32    6.99
   2  -2   4  107.16    6.75
   2  -2   4   99.82    5.79
  -2   2  -5 1884.60   53.12
   2  -2   5 1853.09   55.32
   2  -2   5 1895.83   53.47
  -2   2  -5 1893.52   55.50
  -2   2  -5 1875.76   55.93
   2  -2   5 1833.78   55.45
   2  -2   5 1820.21   55.76
  -2   2  -5 1648.99   54.87
  -2   2  -6  420.94   15.69
   2  -2   6  431.67   17.72
  -2   2  -6  444.93   18.20
   2  -2   6  473.46   18.71
   2  -2   6  462.76   18.20
   2  -2   6  435.88   15.90
  -2   2  -6  409.85   17.55
   2  -2   6  468.64   18.42
  -2   2  -6  446.71   17.83
   2  -2   7  400.53   17.54
  -2   2  -7  435.77   17.80
  -2   2  -7  385.46   16.78
   2  -2   7  429.44   17.59
   2  -2   7  416.45   17.30
  -2   2  -7  425.31   17.30
   2  -2   7  411.61   17.06
   2  -2   7  413.14   15.09
   2  -2   8  404.35   18.33
  -2   2  -8  407.92   17.79
  -2   2  -8  421.26   17.99
   2  -2   8  443.76   18.08
   2  -2   8  414.16   18.02
  -2   2  -8  388.49   15.66
  -2   2  -9  233.69   12.82
   2  -2   9  200.34   12.18
   2  -2   9  226.14   12.36
  -2   2  -9  253.25   12.81
  -2   2  -9  226.63   12.35
   2  -2   9  213.88   11.95
   2  -2   9  229.55   12.45
  -2   2  -9  221.34   10.63
  -2   2 -10  638.39   23.19
  -2   2 -10  715.34   26.87
  -2   2 -10  644.13   25.35
   2  -2  10  645.51   26.25
   2  -2  10  689.45   25.84
   2  -2  10  643.94   25.75
   2  -2  10  616.61   25.38
  -2   2 -10  632.57   25.35
   2  -2  11   18.53    3.38
   2  -2  11   16.48    3.40
  -2   2 -11   25.14    3.93
  -2   2 -11   15.09    3.06
  -2   2 -11   19.35    3.59
   2  -2  11   18.38    3.69
   2  -2  11   20.86    3.45
  -2   2 -11   16.37    2.81
  -2   2 -12  322.05   17.35
   2  -2  12  352.86   17.10
   2  -2  12  320.95   17.48
   2  -2  12  326.08   17.13
  -2   2 -12  327.28   16.79
   2  -2  12  386.89   18.30
  -2   2 -12  350.66   17.34
  -2   2 -12  319.25   16.74
  -2   2 -12  330.03   15.09
   2  -2  13  708.48   29.59
  -2   2 -13  724.06   27.15
   2  -2  13  813.40   31.60
   2  -2  13  740.47   30.25
  -2   2 -13  725.67   29.53
  -2   2 -13  794.93   30.36
   2  -2  13  715.69   29.06
  -2   2 -13  729.30   30.32
  -2   2 -13  746.72   29.89
  -2   2 -14   36.50    4.53
  -2   2 -14   33.94    5.04
   2  -2  14   29.97    4.53
  -2   2 -14   39.80    5.85
   2  -2  14   25.42    4.74
  -2   2 -14   33.65    5.18
   2  -2  14   38.26    5.56
   2  -2  14   33.59    5.10
  -2   2 -14   34.74    5.16
  -2   2 -15 4203.95  127.51
   2  -2  15 4267.68  129.06
  -2   2 -15 4205.67  126.95
  -2   2 -15 4705.81  129.02
   2  -2  15 4237.56  128.24
   2  -2  15 4265.78  127.93
   2  -2  15 4211.68  126.49
  -2   2 -15 4476.58  124.91
   2  -2  16 1522.40   55.27
  -2   2 -16 1614.74   54.51
   2  -2  16 1567.63   53.37
  -2   2 -16 1498.41   51.11
   2  -2  17  761.56   34.72
  -2   2 -17  820.73   33.99
   2  -2  17  849.07   33.85
  -2   2 -17  815.92   31.97
  -2   2 -18  148.68   11.28
   2  -2  18  138.94   12.76
   2  -2  18  156.28   12.12
  -2   2 -19  242.57   15.64
  -2   2 -19  286.98   18.46
   2  -2  19  273.38   18.71
   2  -2  19  275.10   17.16
   2  -2  20  227.81   15.62
  -2   2 -20  201.43   14.14
   2  -2  20  195.50   16.20
  -2   2 -20  209.25   15.89
   2  -2  21   56.77    8.60
   2  -2  21   47.36    7.10
  -2   2 -21   46.71    6.53
  -2   2 -21   46.42    7.44
   2  -2  22  150.55   13.08
  -2   2 -22  160.26   13.14
  -2   2 -22  140.33   13.68
   2  -2  22  156.85   15.23
  -2   2 -23  222.97   16.30
  -2   2 -23  243.90   18.50
   2  -2  23  234.98   19.15
   2  -2  23  221.22   16.49
  -2   2 -24    9.89    4.15
  -2   2 -24    6.49    3.31
   2  -2  24   12.12    4.90
  -2   1  22    7.65    3.02
  -2   1  22   12.03    4.68
   2  -1 -22   10.42    3.76
   2  -1 -22   10.40    3.78
  -2   1  21   76.91    9.30
   2  -1 -21  109.19   12.01
  -2   1  21   94.22   11.65
   2  -1 -21   98.22   10.67
  -2   1  20  136.17   12.29
   2  -1 -20  160.35   13.48
  -2   1  20  153.52   14.98
   2  -1 -20  165.95   14.61
  -2   1  19  106.75   11.90
  -2   1  19  116.62   10.73
   2  -1 -19   92.47   10.68
   2  -1 -19   96.77   10.22
  -2   1  18   33.54    5.51
   2  -1 -18   43.88    6.59
   2  -1 -18   46.48    7.20
  -2   1  18   40.25    3.60
  -2   1  18   24.15    5.95
  -2   1  17   22.70    2.59
  -2   1  17   22.15    4.42
   2  -1 -17   25.29    5.33
  -2   1  17   25.78    5.54
  -2   1  16  425.08   22.25
   2  -1 -16  430.24   22.34
  -2   1  16  463.64   22.17
   2  -1 -16  447.30   23.64
  -2   1  16  466.37   16.26
  -2   1  16  412.38   23.96
  -2   1  15  642.55   28.24
  -2   1  15  667.86   27.56
   2  -1 -15  656.99   29.70
  -2   1  15  625.12   21.29
  -2   1  15  718.65   31.52
   2  -1 -15  666.95   28.49
   2  -1 -14   14.23    2.88
  -2   1  14   14.08    3.31
   2  -1 -14   14.76    3.61
  -2   1  14   17.08    4.01
  -2   1  14   16.79    3.08
  -2   1  14   21.06    2.33
  -2   1  13 1641.59   54.73
  -2   1  13 1533.24   44.01
   2  -1 -13 1544.19   51.49
  -2   1  13 1415.04   50.71
  -2   1  13 1501.81   50.01
   2  -1 -13 1478.18   52.37
  -2   1  12   27.95    4.03
   2  -1 -12   33.44    4.62
   2  -1 -12   23.74    4.15
  -2   1  12   22.30    4.56
  -2   1  12   34.81    4.77
  -2   1  12   25.96    2.37
   2  -1 -12   32.24    5.05
   2  -1 -12   23.56    4.51
   2  -1 -11  132.91    9.37
  -2   1  11  120.19    5.54
  -2   1  11  113.74    9.59
   2  -1 -11  115.16    9.40
  -2   1  11  107.28    8.07
  -2   1  11  110.47    8.58
   2  -1 -11  108.87    8.92
   2  -1 -11  131.36   10.55
  -2   1  10   24.46    4.19
  -2   1  10   34.04    4.37
   2  -1 -10   28.31    4.02
   2  -1 -10   30.53    4.28
   2  -1 -10   35.63    4.73
   2  -1 -10   26.53    4.49
  -2   1  10   31.84    2.38
   2  -1  -9  574.37   23.17
   2  -1  -9  604.85   25.41
  -2   1   9  582.87   23.30
   2  -1  -9  532.89   23.54
  -2   1   9  610.86   18.31
  -2   1   9  586.11   24.81
  -2   1   8   56.72    6.03
   2  -1  -8   74.23    6.98
   2  -1  -8   66.42    6.08
   2  -1  -8   71.32    6.41
  -2   1   8   67.28    3.39
   2  -1  -8   63.94    5.75
  -2   1   8   68.35    5.87
   2  -1  -7  397.99   18.39
  -2   1   7  403.95   18.09
   2  -1  -7  395.40   17.32
  -2   1   7  431.19   12.88
   2  -1  -7  387.07   17.50
  -2   1   7  404.06   12.81
  -2   1   7  414.37   17.14
   2  -1  -7  403.79   17.02
   2  -1  -6 1587.23   47.47
   2  -1  -6 1427.87   47.52
   2  -1  -6 1468.53   46.22
  -2   1   6 1510.48   46.09
  -2   1   6 1501.45   41.16
  -2   1   6 1409.94   47.22
   2  -1  -6 1448.06   45.92
  -2   1   5  182.97    6.46
   2  -1  -5  170.09    9.31
  -2   1   5  181.62   10.28
   2  -1  -5  181.96    9.43
   2  -1  -5  182.41   10.32
   2  -1  -4  955.31   31.86
  -2   1   4  972.14   26.82
   2  -1  -4  970.63   30.64
   2  -1  -4  921.52   30.43
   2  -1  -3 2519.15   69.94
   2  -1  -3 2477.16   65.28
  -2   1   3 2259.29   69.23
   2  -1  -3 2341.02   68.17
  -2   1   3 2329.66   67.14
  -2   1   3 2423.74   65.20
   2  -1  -3 2214.72   68.22
   2  -1  -2  485.97   16.96
  -2   1   2  477.32   16.39
  -2   1   2  480.55   16.99
  -2   1   2  475.65   17.95
   2  -1  -2  487.00   15.13
   2  -1  -2  473.37   17.92
  -2   1   2  484.64   15.14
   2  -1  -1   25.09    2.13
  -2   1   1   21.81    2.71
  -2   1   1   23.54    2.43
  -2   1   1   24.85    2.52
   2  -1  -1   23.71    2.37
  -2   1   1   23.71    2.09
   2  -1  -1   27.09    3.03
   2  -1  -1   25.78    2.59
   2  -1   0  253.10    9.68
   2  -1   0  284.03   10.25
  -2   1   0  246.54    9.95
  -2   1   0  268.74   10.39
   2  -1   0  270.32   11.16
   2  -1   0  259.10   10.29
  -2   1   0  264.57   11.21
  -2   1   0  259.33    9.83
  -2   1  -1  858.79   26.02
   2  -1   1  864.19   25.50
   2  -1   1  813.74   25.81
  -2   1  -1  802.44   25.36
  -2   1  -1  816.24   24.75
  -2   1  -1  831.09   26.43
   2  -1   1  802.39   24.80
   2  -1   2 2970.87   77.03
  -2   1  -2 2788.16   76.69
   2  -1   2 2657.40   78.38
   2  -1   2 2638.49   77.96
  -2   1  -2 2867.93   78.95
   2  -1   2 2700.40   78.57
  -2   1  -2 2691.75   78.49
  -2   1  -2 3064.79   78.67
  -2   1  -3  960.31   34.75
   2  -1   3 1103.31   35.22
   2  -1   3 1188.40   35.61
  -2   1  -3 1346.36   36.44
   2  -1   3 1065.12   35.31
   2  -1   3 1264.11   33.70
  -2   1  -3 1245.40   35.76
  -2   1  -3 1177.00   33.34
   2  -1   4  182.25    9.33
   2  -1   4  194.52    9.11
   2  -1   4  217.53    9.93
  -2   1  -4  204.96    9.40
   2  -1   4  194.39    9.20
  -2   1  -4  208.99    9.35
  -2   1  -4  187.73    7.37
   2  -1   4  199.13    7.52
   2  -1   5   72.83    5.46
  -2   1  -5   73.00    3.89
  -2   1  -5   83.36    5.62
  -2   1  -5   69.42    5.29
   2  -1   5   67.85    5.06
   2  -1   5   76.63    5.53
   2  -1   5   74.47    5.17
   2  -1   5   68.16    3.80
  -2   1  -5   65.33    4.88
   2  -1   6  342.91   14.54
   2  -1   6  320.72   13.46
  -2   1  -6  329.46   13.94
  -2   1  -6  322.40   13.44
   2  -1   6  330.28   14.20
   2  -1   6  315.36   13.69
  -2   1  -6  327.60   11.54
  -2   1  -7  175.00    9.62
   2  -1   7  161.16    9.34
   2  -1   7  153.28    9.27
  -2   1  -7  170.47    9.57
   2  -1   7  155.64    8.71
  -2   1  -7  194.21    9.74
  -2   1  -7  162.49    8.76
   2  -1   7  158.57    8.97
  -2   1  -7  153.72    7.09
  -2   1  -8  690.03   26.06
  -2   1  -8  731.17   25.65
  -2   1  -8  696.40   23.29
  -2   1  -8  732.76   26.60
   2  -1   8  725.61   25.65
  -2   1  -8  731.30   26.16
   2  -1   8  749.78   26.14
   2  -1   8  788.72   27.14
  -2   1  -9   72.10    6.14
  -2   1  -9   74.95    5.83
   2  -1   9   63.86    6.03
  -2   1  -9   71.77    4.81
   2  -1   9   76.70    6.12
  -2   1  -9   71.65    5.95
   2  -1   9   69.32    6.40
   2  -1   9   75.63    6.24
  -2   1  -9   74.29    6.38
  -2   1  -9   67.45    6.11
   2  -1  10 2737.62   83.82
   2  -1  10 2659.46   82.63
  -2   1 -10 2933.62   82.75
   2  -1  10 2666.91   82.61
  -2   1 -10 3161.82   85.31
  -2   1 -10 3002.70   83.92
  -2   1 -10 2707.03   82.48
  -2   1 -10 2990.16   84.32
  -2   1 -10 2761.40   80.05
   2  -1  10 2721.21   83.82
  -2   1 -11 2078.59   63.18
   2  -1  11 2137.47   63.78
   2  -1  11 1847.98   60.97
   2  -1  11 1943.49   62.48
  -2   1 -11 1883.78   61.90
   2  -1  11 1930.35   61.43
  -2   1 -11 2105.93   61.82
  -2   1 -11 2088.09   62.46
  -2   1 -11 1970.46   58.83
   2  -1  12 3632.41  101.55
   2  -1  12 3261.89  100.59
   2  -1  12 3339.51   99.55
  -2   1 -12 3277.14   98.89
   2  -1  12 3372.70   99.21
  -2   1 -12 3346.34   99.47
  -2   1 -12 3612.97  100.99
  -2   1 -12 3305.73  100.56
  -2   1 -12 3376.98   99.30
  -2   1 -12 3402.68   96.70
  -2   1 -13 1798.34   58.50
   2  -1  13 1870.58   57.36
   2  -1  13 1717.70   57.86
   2  -1  13 1852.29   57.66
   2  -1  13 1694.61   58.04
  -2   1 -13 1724.59   56.79
  -2   1 -13 1653.69   56.30
  -2   1 -13 1653.48   57.11
  -2   1 -13 1922.06   57.77
  -2   1 -13 1783.47   54.47
   2  -1  14    2.47    1.43
  -2   1 -14    2.02    1.76
  -2   1 -14   -0.22    1.49
   2  -1  14    1.32    1.12
  -2   1 -14    2.88    1.31
   2  -1  14    0.08    1.44
  -2   1 -14    0.89    0.69
  -2   1 -14    2.52    1.08
  -2   1 -14    2.72    1.60
   2  -1  15  947.72   37.62
   2  -1  15  979.63   36.44
   2  -1  15  966.99   37.02
  -2   1 -15  969.17   36.64
  -2   1 -15 1001.28   37.22
  -2   1 -15  966.28   36.59
  -2   1 -15 1030.48   37.93
  -2   1 -15  978.65   34.63
   2  -1  15  964.35   38.27
  -2   1 -16   61.02    7.31
   2  -1  16   61.18    7.12
  -2   1 -16   64.14    7.16
   2  -1  16   54.05    6.95
  -2   1 -16   43.05    6.12
  -2   1 -16   55.26    5.93
   2  -1  16   52.62    7.02
  -2   1 -16   46.92    5.97
   2  -1  16   59.80    6.72
   2  -1  17  155.89   12.78
   2  -1  17  147.18   11.27
  -2   1 -17  137.87   10.23
  -2   1 -17  149.36   11.90
  -2   1 -17  133.41   11.00
   2  -1  18   81.31    8.22
  -2   1 -18   75.36    8.22
  -2   1 -18   77.98    7.73
  -2   1 -18   77.67    8.84
   2  -1  18   75.25    8.76
   2  -1  19   15.59    4.31
   2  -1  19   14.55    3.74
  -2   1 -19   14.68    3.99
  -2   1 -19    7.66    3.13
  -2   1 -19   10.80    2.65
   2  -1  20  166.68   14.52
  -2   1 -20  156.50   13.01
  -2   1 -20  147.38   13.04
  -2   1 -20  170.88   12.60
   2  -1  20  173.11   13.07
  -2   1 -21  319.63   18.85
  -2   1 -21  330.51   20.37
  -2   1 -21  346.06   21.19
   2  -1  21  296.20   18.51
  -2   1 -22   96.95    9.85
  -2   1 -22   96.25   10.71
  -2   1 -22   97.64   10.79
   2  -1  22  110.46   10.78
  -2   1 -23  267.68   19.36
   2  -1  23  263.35   20.34
  -2   1 -23  270.08   17.85
   2  -1  23  284.62   18.41
   2  -1  24    2.58    2.72
  -2   1 -24    2.42    1.93
   2  -1  24    2.43    1.89
  -2   1 -24    5.22    3.71
  -2   1 -24    4.17    2.94
   2   0 -22   57.15    9.01
  -2   0  22   72.67   10.54
  -2   0  21   54.25    7.69
   2   0 -21   51.29    8.25
   2   0 -21   53.48    7.35
  -2   0  20   44.32    7.78
   2   0 -20   50.61    8.12
   2   0 -20   28.46    5.37
  -2   0  20   51.48    7.12
  -2   0  19    2.52    2.75
   2   0 -19    4.64    2.97
  -2   0  19    1.55    0.85
  -2   0  19    0.28    1.94
   2   0 -19   -0.41    1.23
  -2   0  18  208.84    9.70
   2   0 -18  213.07   14.40
   2   0 -18  204.47   15.77
  -2   0  18  222.63   14.64
  -2   0  18  196.98   16.27
  -2   0  18  193.51   13.96
  -2   0  17  154.17   13.64
  -2   0  17  137.91   11.26
  -2   0  17  145.60   11.30
   2   0 -17  143.60   12.66
   2   0 -17  155.17   11.75
   2   0 -16   43.20    6.53
  -2   0  16   44.26    5.80
   2   0 -16   45.48    5.96
  -2   0  16   41.03    5.73
  -2   0  16   46.77    3.83
  -2   0  16   41.37    6.73
   2   0 -15   30.75    4.68
  -2   0  15   37.25    4.92
  -2   0  15   25.66    2.70
   2   0 -15   41.49    6.27
  -2   0  15   30.05    4.83
  -2   0  15   22.16    4.95
  -2   0  14  342.77   12.50
  -2   0  14  337.98   16.78
  -2   0  14  283.00   18.28
   2   0 -14  326.30   18.63
  -2   0  14  328.88   17.02
   2   0 -14  336.44   17.06
  -2   0  13  391.08   13.58
  -2   0  13  398.48   20.56
   2   0 -13  396.75   18.41
  -2   0  13  379.28   18.18
  -2   0  13  385.19   17.74
  -2   0  13  376.49   20.43
   2   0 -13  343.68   19.41
  -2   0  12    6.65    2.23
  -2   0  12    5.72    2.12
  -2   0  12    7.69    1.24
  -2   0  12    6.95    2.13
  -2   0  12    5.68    1.78
   2   0 -12    8.23    3.03
   2   0 -12    6.48    2.10
   2   0 -12    7.89    2.64
   2   0 -11   28.00    3.76
  -2   0  11   28.04    4.58
   2   0 -11   25.64    4.42
  -2   0  11   20.61    3.97
  -2   0  11   24.96    3.47
  -2   0  11   25.38    3.64
   2   0 -11   21.04    4.05
  -2   0  11   21.41    1.96
  -2   0  10  549.51   21.15
   2   0 -10  522.90   21.42
  -2   0  10  538.03   23.95
  -2   0  10  623.31   24.87
   2   0 -10  530.48   23.57
   2   0 -10  552.09   24.50
  -2   0  10  565.83   21.87
  -2   0  10  587.00   17.32
  -2   0   9  758.50   26.59
  -2   0   9  728.68   29.56
   2   0  -9  793.64   29.82
  -2   0   9  798.05   22.69
  -2   0   9  800.78   27.69
   2   0  -9  802.86   27.67
   2   0  -9  786.33   30.47
  -2   0   8  303.50   13.10
   2   0  -8  296.43   15.69
  -2   0   8  309.44   15.59
  -2   0   8  339.70   14.20
   2   0  -8  331.86   14.11
  -2   0   8  335.00   10.02
  -2   0   7 1694.02   55.49
   2   0  -7 1697.98   55.09
   2   0  -7 1893.32   56.71
  -2   0   7 1802.14   53.35
   2   0  -7 1848.07   53.42
   2   0  -6    4.58    1.54
  -2   0   6    2.92    1.24
   2   0  -6    4.75    1.51
   2   0  -6    4.87    1.18
  -2   0   6    4.13    1.66
   2   0  -5   25.90    2.69
   2   0  -5   27.62    3.34
  -2   0   5   27.20    3.47
  -2   0   5   28.68    2.85
   2   0  -5   24.14    3.38
   2   0  -4   59.72    4.09
   2   0  -4   59.75    5.02
   2   0  -4   51.68    4.59
  -2   0   4   53.70    4.66
  -2   0   3  286.88   12.07
   2   0  -3  288.15   12.08
   2   0  -3  302.68   11.05
  -2   0   2   72.21    4.91
   2   0  -2   72.99    4.94
  -2   0   2   71.75    3.61
  -2   0   2   73.19    3.03
   2   0  -2   76.07    3.00
   2   0  -1  192.25    6.72
  -2   0   1  194.69    7.10
   2   0  -1  194.34    8.46
  -2   0   1  200.14    6.87
  -2   0   1  194.43    8.46
   2   0  -1  185.09    7.00
  -2   0   0   12.26    1.32
   2   0   0   13.70    1.41
  -2   0   0   12.58    1.34
   2   0   0   10.35    1.21
   2   0   0   12.44    1.42
  -2   0   0   11.66    1.60
   2   0   0   11.40    1.56
  -2   0  -1 1773.06   51.77
  -2   0  -1 1794.10   51.55
   2   0   1 1811.11   51.55
  -2   0  -1 1815.04   51.74
   2   0   1 1964.17   50.91
   2   0   1 1951.51   52.08
   2   0   1 1797.79   51.62
  -2   0  -2  288.31   10.29
   2   0   2  268.49   10.15
   2   0   2  256.60   10.54
   2   0   2  270.09   10.14
   2   0   2  266.46    8.45
  -2   0  -2  274.94    8.49
   2   0   2  275.53    9.76
  -2   0  -2  266.07    9.64
  -2   0  -2  261.88   10.18
   2   0   3  604.12   19.38
  -2   0  -3  581.57   19.35
   2   0   3  596.19   19.32
   2   0   3  613.36   18.85
  -2   0  -4 2938.13   76.79
  -2   0  -4 2458.18   75.96
   2   0   4 3025.11   75.62
  -2   0  -4 2730.85   76.91
   2   0   4 2675.29   76.29
  -2   0  -4 2711.47   75.25
   2   0   4 3050.79   76.98
   2   0   4 2206.54   75.82
  -2   0  -5 1260.29   39.60
  -2   0  -5 1330.51   40.25
  -2   0  -5 1266.52   39.54
  -2   0  -5 1273.98   38.33
   2   0   5 1256.46   39.68
   2   0   5 1289.89   40.12
   2   0   5 1261.96   39.39
   2   0   6   57.41    4.73
   2   0   6   54.95    4.42
  -2   0  -6   63.60    4.80
  -2   0  -6   50.76    2.71
   2   0   6   51.12    3.91
   2   0   6   52.30    4.63
  -2   0  -6   56.60    4.00
  -2   0  -6   55.68    4.76
  -2   0  -7  348.46   14.72
  -2   0  -7  362.20   15.00
  -2   0  -7  338.59   14.26
   2   0   7  338.37   13.23
   2   0   7  328.26   14.01
  -2   0  -7  361.41   11.54
   2   0   7  327.10   14.56
   2   0   8  156.37    9.16
  -2   0  -8  141.50    8.86
   2   0   8  146.90    8.42
  -2   0  -8  155.79    8.83
   2   0   8  143.00    7.78
  -2   0  -8  138.94    7.74
  -2   0  -8  142.08    7.61
  -2   0  -8  159.53    9.20
   2   0   8  146.14    9.04
   2   0   9   63.30    5.77
   2   0   9   57.80    5.62
  -2   0  -9   73.46    6.09
  -2   0  -9   55.83    4.70
   2   0   9   54.10    4.97
   2   0   9   61.01    5.04
  -2   0  -9   49.06    4.89
  -2   0  -9   57.58    5.52
   2   0  10   54.82    5.33
   2   0  10   63.35    5.32
  -2   0 -10   67.15    5.43
  -2   0 -10   53.82    5.26
   2   0  10   46.97    5.21
  -2   0 -10   54.18    5.60
   2   0  10   64.74    6.30
  -2   0 -10   51.74    5.42
  -2   0 -10   50.56    4.82
  -2   0 -11  456.52   19.81
   2   0  11  436.65   19.71
   2   0  11  475.08   20.42
  -2   0 -11  444.31   19.63
   2   0  11  385.50   17.89
   2   0  11  453.79   18.30
  -2   0 -11  419.60   18.49
  -2   0 -11  415.63   17.57
  -2   0 -11  418.95   17.79
  -2   0 -12  451.71   20.82
  -2   0 -12  450.03   19.90
   2   0  12  519.81   20.22
  -2   0 -12  448.68   19.04
   2   0  12  470.23   21.19
   2   0  12  435.51   19.56
   2   0  12  458.48   21.01
  -2   0 -12  474.74   21.10
  -2   0 -12  459.95   19.43
  -2   0 -13  432.67   20.39
   2   0  13  376.56   19.56
  -2   0 -13  421.90   18.80
   2   0  13  407.11   18.46
  -2   0 -13  419.87   19.03
   2   0  13  412.27   18.77
  -2   0 -13  447.30   20.51
   2   0  13  408.74   20.12
  -2   0 -13  408.38   18.26
  -2   0 -14  288.28   16.16
   2   0  14  263.23   14.43
  -2   0 -14  254.26   14.41
   2   0  14  302.08   16.70
  -2   0 -14  292.54   16.17
   2   0  14  272.07   16.00
   2   0  14  261.04   14.46
  -2   0 -14  264.03   14.72
  -2   0 -14  275.59   14.51
  -2   0 -15  149.51   11.70
  -2   0 -15  157.13   11.07
   2   0  15  137.94   10.36
   2   0  15  153.28   11.73
  -2   0 -15  150.71   10.44
  -2   0 -15  146.78   10.64
   2   0  15  147.37   10.38
  -2   0 -15  145.92   11.42
  -2   0 -16  163.90   11.78
   2   0  16  151.62   12.18
  -2   0 -16  173.41   12.79
   2   0  16  157.59   11.43
  -2   0 -16  152.03   11.27
  -2   0 -16  143.25   10.62
   2   0  16  165.26   11.30
   2   0  17    7.95    2.73
   2   0  17   23.76    4.14
  -2   0 -17   29.89    5.35
  -2   0 -17   13.06    2.69
  -2   0 -17   17.42    3.83
  -2   0 -17    9.23    2.83
  -2   0 -17   18.36    3.73
   2   0  18  209.99   13.62
  -2   0 -18  198.35   14.79
  -2   0 -18  183.78   11.76
  -2   0 -18  220.12   14.04
   2   0  18  194.15   14.82
   2   0  18  177.92   13.26
  -2   0 -19  143.73   12.54
  -2   0 -19  128.54    9.90
   2   0  19  141.98   11.27
  -2   0 -19  156.48   12.03
   2   0  19  126.57   12.16
   2   0  20   64.20    7.51
  -2   0 -20   53.77    7.96
   2   0  20   60.55    8.54
  -2   0 -20   57.82    7.29
   2   0  21   64.84    7.75
   2   0  21   65.99    9.11
  -2   0 -21   78.21    8.87
  -2   0 -21   72.82    9.10
   2   0  22  116.48   12.37
  -2   0 -22  121.14   11.30
   2   0  22  127.22   11.31
  -2   0 -22  109.38   11.82
   2   0  23  164.30   15.21
   2   0  23  153.57   12.92
  -2   0 -23  148.51   13.24
  -2   0 -23  142.05   12.52
  -2   0 -23  160.17   14.84
   2   0  24  384.80   25.92
   2   0  24  412.04   23.08
  -2   0 -24  431.02   24.50
  -2   0 -24  413.89   25.60
  -2   0 -24  400.54   23.14
  -2  -1  22    5.85    3.25
   2   1 -22    8.04    3.36
  -2  -1  21  125.53   13.88
   2   1 -21   99.40    9.87
   2   1 -21  105.00   12.20
  -2  -1  21  111.42   10.86
   2   1 -20   60.33    9.07
  -2  -1  20   47.71    8.44
  -2  -1  20   53.55    7.55
   2   1 -20   44.82    6.26
  -2  -1  19  491.52   18.89
  -2  -1  19  541.61   25.40
   2   1 -19  507.06   27.60
   2   1 -19  479.96   23.47
  -2  -1  18   15.43    2.45
  -2  -1  18   15.14    3.45
   2   1 -18   15.74    4.17
   2   1 -18   14.11    3.28
   2   1 -17  109.65   11.14
  -2  -1  17   94.36   10.66
  -2  -1  17  100.90    9.05
   2   1 -17  106.83    9.02
  -2  -1  16  409.90   15.48
  -2  -1  16  388.18   19.41
   2   1 -16  405.75   22.67
  -2  -1  16  420.38   23.48
  -2  -1  16  367.84   18.90
   2   1 -16  394.88   19.13
  -2  -1  15   40.56    6.49
  -2  -1  15   45.32    3.89
  -2  -1  15   53.25    5.98
  -2  -1  15   46.44    5.47
   2   1 -15   51.23    7.09
   2   1 -15   49.60    5.57
  -2  -1  14  809.21   25.83
   2   1 -14  820.34   30.00
  -2  -1  14  780.77   29.97
   2   1 -14  775.75   33.46
   2   1 -14  787.65   26.06
  -2  -1  14  816.40   30.13
  -2  -1  14  843.74   34.81
  -2  -1  13   34.37    3.11
  -2  -1  13   38.42    5.99
  -2  -1  13   38.94    4.66
   2   1 -13   33.66    4.34
  -2  -1  13   37.84    5.98
   2   1 -13   37.85    3.40
   2   1 -13   35.79    5.60
  -2  -1  13   33.30    4.33
   2   1 -12 1071.88   32.80
  -2  -1  12 1076.99   32.52
  -2  -1  12 1173.30   41.46
   2   1 -12 1012.10   39.78
  -2  -1  12 1066.51   36.42
  -2  -1  12 1077.26   40.84
   2   1 -12 1081.86   40.99
  -2  -1  12 1121.70   36.64
   2   1 -12 1121.90   36.51
  -2  -1  11  726.06   22.97
  -2  -1  11  780.74   26.89
  -2  -1  11  707.15   29.94
   2   1 -11  755.30   23.23
  -2  -1  11  807.42   30.89
   2   1 -11  674.83   29.29
   2   1 -11  750.18   30.66
  -2  -1  11  754.69   26.58
   2   1 -11  746.35   26.35
  -2  -1  10    0.93    0.58
   2   1 -10    0.53    0.92
  -2  -1  10    1.13    1.15
   2   1 -10    1.47    0.81
   2   1 -10    0.64    0.53
  -2  -1  10    3.00    1.25
  -2  -1  10    1.31    0.58
  -2  -1  10    1.38    0.74
   2   1 -10    0.72    0.98
  -2  -1   9    6.38    1.60
  -2  -1   9    8.95    2.59
   2   1  -9    3.28    1.66
  -2  -1   9    2.66    1.53
   2   1  -9    6.33    1.06
   2   1  -9    7.81    1.66
   2   1  -9    8.80    2.64
  -2  -1   9    6.48    1.43
  -2  -1   8  302.63    9.70
  -2  -1   8  258.44   14.11
  -2  -1   8  299.35   12.18
  -2  -1   8  272.01   11.61
   2   1  -8  249.65   13.94
  -2  -1   8  278.35   14.54
   2   1  -8  322.56   15.31
   2   1  -8  287.17    9.68
   2   1  -8  286.97   11.91
   2   1  -7 1242.12   42.04
  -2  -1   7 1252.55   38.10
  -2  -1   7 1322.71   35.76
   2   1  -7 1245.48   42.33
   2   1  -7 1263.71   38.26
  -2  -1   7 1309.22   42.57
   2   1  -7 1303.94   35.77
  -2  -1   7 1274.82   38.38
  -2  -1   7 1240.96   42.00
  -2  -1   6  955.17   31.21
   2   1  -6  841.83   30.20
  -2  -1   6  881.38   24.58
   2   1  -6  907.14   24.62
  -2  -1   6  832.14   30.13
   2   1  -6  880.36   26.92
  -2  -1   6  847.06   26.80
  -2  -1   6  854.67   26.52
   2   1  -6  881.37   30.63
  -2  -1   5   30.26    3.58
   2   1  -5   29.96    3.61
   2   1  -5   28.13    3.41
  -2  -1   5   29.09    2.36
  -2  -1   5   25.55    2.10
  -2  -1   5   29.91    3.50
   2   1  -5   32.07    2.50
  -2  -1   4   38.52    2.28
  -2  -1   4   38.79    3.90
  -2  -1   4   46.76    4.18
   2   1  -4   38.58    3.93
   2   1  -4   37.82    3.80
   2   1  -4   41.92    2.67
  -2  -1   3  280.71   11.74
  -2  -1   3  303.73   12.23
   2   1  -3  259.60   11.72
   2   1  -3  274.54    9.41
   2   1  -3  298.65   11.95
   2   1  -2 1136.23   30.13
  -2  -1   2 1035.81   32.80
  -2  -1   2  993.34   33.03
   2   1  -2 1092.93   33.38
   2   1  -2 1052.48   32.82
  -2  -1   2 1101.24   32.10
  -2  -1   1  654.62   20.00
  -2  -1   1  637.35   20.39
   2   1  -1  666.36   21.09
   2   1  -1  644.85   18.86
   2   1  -1  637.03   20.38
   2   1  -1  642.15   19.85
   2   1   0 2764.76   79.01
   2   1   0 2941.82   78.92
  -2  -1   0 2825.35   78.91
  -2  -1   0 3063.32   79.26
   2   1   0 2822.54   78.61
   2   1   0 2828.39   78.99
   2   1   1  680.06   19.64
   2   1   1  652.50   20.64
  -2  -1  -1  685.87   20.45
  -2  -1  -1  711.08   19.87
   2   1   1  688.59   19.80
  -2  -1  -1  637.28   20.39
   2   1   1  664.23   20.47
  -2  -1  -1  663.13   19.52
   2   1   1  666.54   20.47
  -2  -1  -1  651.81   20.57
  -2  -1  -2  245.07    8.79
   2   1   2  238.44    9.42
  -2  -1  -2  235.33    9.20
   2   1   2  239.39    7.66
   2   1   2  239.04    9.16
   2   1   2  231.54    8.70
  -2  -1  -2  235.10    9.34
   2   1   3 3059.07   91.03
  -2  -1  -3 3522.53   91.93
   2   1   3 3480.95   91.95
   2   1   3 3077.21   91.84
  -2  -1  -3 3480.32   92.35
  -2  -1  -3 3401.95   91.37
   2   1   4   43.55    3.53
   2   1   4   45.25    3.84
  -2  -1  -4   41.77    3.71
   2   1   4   42.45    3.53
   2   1   4   44.67    2.61
  -2  -1  -4   46.98    3.67
  -2  -1  -4   44.61    3.55
  -2  -1  -5  435.00   12.03
  -2  -1  -5  432.83   12.85
  -2  -1  -5  434.21   16.13
  -2  -1  -5  385.96   13.08
   2   1   5  416.89   15.91
  -2  -1  -5  420.74   15.42
   2   1   5  418.26   15.38
   2   1   5  408.07   15.30
   2   1   5  425.38   13.33
  -2  -1  -6  798.82   25.91
   2   1   6  815.52   25.74
  -2  -1  -6  747.03   21.42
  -2  -1  -6  720.12   25.60
   2   1   6  770.05   25.15
   2   1   6  724.52   22.54
  -2  -1  -6  742.34   22.51
  -2  -1  -6  732.93   22.60
  -2  -1  -6  720.01   24.83
  -2  -1  -7 2441.68   72.74
  -2  -1  -7 2488.44   68.49
  -2  -1  -7 2438.74   73.27
   2   1   7 2477.09   72.27
  -2  -1  -7 2477.22   69.77
  -2  -1  -7 2475.48   72.38
   2   1   7 2592.08   70.00
  -2  -1  -7 2591.85   69.89
   2   1   7 2511.80   73.47
   2   1   7 2484.63   72.83
  -2  -1  -8 1140.05   38.41
  -2  -1  -8 1356.11   39.23
   2   1   8  998.38   37.17
  -2  -1  -8 1173.62   37.52
  -2  -1  -8 1194.89   35.26
  -2  -1  -8 1120.68   33.87
  -2  -1  -8 1173.41   35.44
   2   1   8 1190.63   37.54
   2   1   8 1267.57   35.64
   2   1   9  912.28   30.40
   2   1   9  784.03   28.74
  -2  -1  -9  823.83   29.10
   2   1   9  858.04   26.47
  -2  -1  -9  704.80   25.45
  -2  -1  -9  800.41   29.42
  -2  -1  -9  822.61   26.64
  -2  -1  -9  814.66   28.23
   2   1   9  781.25   27.92
  -2  -1  -9  829.13   25.00
  -2  -1 -10  709.66   26.36
   2   1  10  715.53   26.55
   2   1  10  654.18   23.43
  -2  -1 -10  654.02   22.01
  -2  -1 -10  741.31   25.79
  -2  -1 -10  725.81   24.29
   2   1  10  702.75   23.67
  -2  -1 -10  669.98   26.44
  -2  -1 -10  684.38   23.35
   2   1  10  663.80   24.99
   2   1  10  605.89   25.83
  -2  -1 -11  151.47   10.17
   2   1  11  139.48    9.86
   2   1  11  155.30    9.51
  -2  -1 -11  149.77    7.78
  -2  -1 -11  163.36    9.89
   2   1  11  163.17    8.92
   2   1  11  149.28    8.68
   2   1  11  158.49   10.66
  -2  -1 -11  158.64   10.57
  -2  -1 -11  158.19    9.04
  -2  -1 -11  144.58    8.30
  -2  -1 -12   43.36    3.94
  -2  -1 -12   41.30    4.59
   2   1  12   49.27    4.86
   2   1  12   39.03    5.15
   2   1  12   36.63    4.13
  -2  -1 -12   42.47    4.31
   2   1  12   34.67    4.32
   2   1  12   32.01    4.63
  -2  -1 -12   43.21    5.07
  -2  -1 -12   39.63    5.28
   2   1  13  474.86   21.84
  -2  -1 -13  464.80   18.03
   2   1  13  452.85   19.25
  -2  -1 -13  470.67   19.18
   2   1  13  450.94   19.90
   2   1  13  473.62   22.23
  -2  -1 -13  485.24   20.16
  -2  -1 -13  487.92   20.78
  -2  -1 -13  448.79   21.66
  -2  -1 -14  310.02   15.88
  -2  -1 -14  305.48   17.49
   2   1  14  315.39   15.98
   2   1  14  333.36   18.24
  -2  -1 -14  369.37   15.12
  -2  -1 -14  279.70   15.58
   2   1  14  349.92   16.11
  -2  -1 -14  305.63   15.00
   2   1  14  331.30   17.79
  -2  -1 -15   29.54    4.54
   2   1  15   29.63    4.92
   2   1  15   24.15    4.45
  -2  -1 -15   29.90    3.82
  -2  -1 -15   29.30    4.40
  -2  -1 -15   27.22    4.75
   2   1  15   30.14    4.32
  -2  -1 -15   30.47    4.13
   2   1  15   34.05    4.52
   2   1  16  289.10   15.52
  -2  -1 -16  295.81   16.28
   2   1  16  290.39   17.76
   2   1  16  265.48   16.83
  -2  -1 -16  312.06   15.67
  -2  -1 -16  321.03   18.22
   2   1  16  299.37   16.06
  -2  -1 -16  265.63   15.80
  -2  -1 -16  265.62   13.87
  -2  -1 -17  289.18   14.67
   2   1  17  287.47   17.92
  -2  -1 -17  273.51   16.44
  -2  -1 -17  273.36   15.97
   2   1  17  257.47   15.51
   2   1  17  304.26   16.51
  -2  -1 -17  287.08   15.61
  -2  -1 -17  293.22   18.06
   2   1  18  141.34   10.94
  -2  -1 -18  151.63   11.10
   2   1  18  173.82   13.58
  -2  -1 -18  135.53   11.11
  -2  -1 -18  151.98   10.30
  -2  -1 -18  134.43   11.35
   2   1  18  166.65   11.76
  -2  -1 -18  141.14   12.36
   2   1  19  623.04   26.52
   2   1  19  490.42   24.62
  -2  -1 -19  581.59   25.55
  -2  -1 -19  505.46   23.24
   2   1  19  582.53   28.86
  -2  -1 -19  565.29   28.33
   2   1  20   76.12    9.73
   2   1  20   91.13    8.96
  -2  -1 -20   87.29    8.53
  -2  -1 -20   95.10    9.08
  -2  -1 -20  102.65   10.99
  -2  -1 -21  500.35   27.62
   2   1  21  502.42   27.95
   2   1  21  542.87   25.43
  -2  -1 -21  491.99   24.65
   2   1  22  425.72   22.78
  -2  -1 -22  423.63   22.78
  -2  -1 -22  466.25   26.60
   2   1  23  237.27   16.30
  -2  -1 -23  243.62   18.76
   2   1  23  259.71   19.56
  -2  -1 -23  208.52   15.54
   2   1  24  343.11   23.79
  -2  -1 -24  323.57   20.26
   2   1  24  325.75   19.96
  -2  -1 -24  330.72   22.77
  -2  -2  22    2.01    2.25
   2   2 -22    2.62    2.96
  -2  -2  21  105.72   10.53
   2   2 -21  120.40   13.44
   2   2 -20   -0.47    1.88
   2   2 -20    2.25    1.37
  -2  -2  19   45.12    4.66
   2   2 -19   30.09    6.30
   2   2 -19   42.99    5.47
  -2  -2  18  139.47    8.44
   2   2 -18  119.33   12.40
  -2  -2  18  133.95   10.92
  -2  -2  18  127.36   12.82
  -2  -2  18  136.31   10.46
   2   2 -18  124.32    9.52
  -2  -2  17   73.36    5.78
   2   2 -17   63.55    5.49
   2   2 -17   69.36    8.91
  -2  -2  17   66.06    7.37
  -2  -2  17   58.99    6.44
  -2  -2  17   71.58    9.27
   2   2 -17   65.87    6.47
  -2  -2  16    0.82    1.51
  -2  -2  16   11.17    3.66
  -2  -2  16    2.86    1.07
   2   2 -16    5.10    1.82
  -2  -2  16    6.84    2.06
   2   2 -16    7.25    2.85
   2   2 -16    7.18    2.18
  -2  -2  15  204.67   11.62
  -2  -2  15  191.04   12.02
   2   2 -15  173.57    9.52
   2   2 -15  170.70   13.86
   2   2 -15  205.14   11.52
  -2  -2  15  207.19   10.01
   2   2 -14   42.37    4.63
  -2  -2  14   32.26    3.98
  -2  -2  14   40.10    3.79
   2   2 -14   36.79    5.95
   2   2 -14   34.44    3.57
  -2  -2  14   44.14    5.26
  -2  -2  13   95.02    5.90
  -2  -2  13   98.27    7.63
   2   2 -13   90.51    6.68
  -2  -2  13   87.57    8.86
  -2  -2  13   81.76    8.89
   2   2 -13   78.30    8.56
  -2  -2  13   99.50    7.05
   2   2 -13   85.28    5.80
  -2  -2  12  145.59   11.56
  -2  -2  12  167.21    8.08
   2   2 -12  152.67   11.90
  -2  -2  12  150.24    8.68
   2   2 -12  177.81   12.58
   2   2 -12  149.82    8.00
  -2  -2  12  150.33    9.37
   2   2 -12  147.97    8.61
  -2  -2  11 1327.40   48.89
  -2  -2  11 1402.10   42.42
  -2  -2  11 1419.20   44.75
  -2  -2  11 1368.58   49.23
   2   2 -11 1362.68   49.14
   2   2 -11 1445.88   42.52
  -2  -2  11 1485.18   44.04
   2   2 -11 1394.22   43.50
   2   2 -10   41.81    3.73
  -2  -2  10   44.38    4.22
  -2  -2  10   44.40    3.56
  -2  -2  10   40.87    5.54
  -2  -2  10   50.02    4.10
   2   2 -10   46.91    3.64
   2   2 -10   55.11    6.37
   2   2 -10   50.11    6.08
  -2  -2  10   46.29    5.95
   2   2  -9  146.71   10.32
  -2  -2   9  148.43    7.94
  -2  -2   9  140.09    6.90
  -2  -2   9  160.51   10.76
  -2  -2   9  145.61   10.32
   2   2  -9  138.62    6.66
  -2  -2   9  152.08    7.35
   2   2  -9  154.57    7.26
   2   2  -8  179.28   11.08
  -2  -2   8  158.97    7.31
   2   2  -8  178.96    7.47
  -2  -2   8  182.62   11.17
  -2  -2   8  168.76   10.86
   2   2  -8  184.18   11.23
   2   2  -8  158.93    7.24
  -2  -2   8  171.88    7.46
  -2  -2   8  152.59    7.88
  -2  -2   7 3467.86  101.01
  -2  -2   7 3778.70  102.22
   2   2  -7 3669.07  102.06
   2   2  -7 3690.73  100.97
  -2  -2   7 4086.05  108.15
   2   2  -7 3489.71  106.72
  -2  -2   7 3817.34  100.91
  -2  -2   7 3596.57  106.80
   2   2  -7 3681.13  107.04
   2   2  -7 3843.21  100.91
   2   2  -6  134.18    6.07
   2   2  -6  121.45    5.50
   2   2  -6  147.04    8.95
  -2  -2   6  123.46    5.61
  -2  -2   6  125.24    8.44
   2   2  -6   98.41    7.45
  -2  -2   6  118.11    5.01
  -2  -2   6  131.86    8.46
   2   2  -6  123.09    5.05
   2   2  -5   36.99    2.47
  -2  -2   5   32.24    2.38
   2   2  -5   34.39    4.03
  -2  -2   5   28.68    3.56
  -2  -2   5   34.35    1.87
   2   2  -5   35.80    1.88
   2   2  -5   30.77    3.71
  -2  -2   4   63.79    5.22
   2   2  -4   64.91    5.28
   2   2  -4   64.46    5.05
  -2  -2   4   64.48    3.14
   2   2  -4   62.13    3.40
  -2  -2   4   56.76    4.86
   2   2  -4   61.06    3.07
  -2  -2   3 3221.45   93.80
   2   2  -3 3197.31   91.01
   2   2  -3 3426.65   89.86
  -2  -2   3 3188.74   93.91
  -2  -2   3 3713.23   95.15
   2   2  -3 3235.18   94.28
   2   2  -3 3481.69   94.24
  -2  -2   3 3436.26   89.89
  -2  -2   2   43.25    3.73
  -2  -2   2   42.06    3.46
   2   2  -2   44.40    3.57
  -2  -2   2   41.68    3.62
   2   2  -2   41.36    3.49
   2   2  -2   42.92    3.71
   2   2  -1 1089.80   33.61
   2   2  -1 1039.77   33.26
  -2  -2   1 1104.61   30.65
  -2  -2   1 1058.96   32.62
  -2  -2   1 1226.84   34.34
  -2  -2   1 1214.11   33.83
   2   2  -1 1082.04   33.30
   2   2  -1 1088.57   32.75
  -2  -2   0  127.21    6.66
  -2  -2   0  142.74    5.95
   2   2   0  148.80    6.06
   2   2   0  123.72    6.28
   2   2   0  158.30    6.62
  -2  -2   0  136.06    6.33
  -2  -2   0  136.74    5.49
   2   2   0  128.23    5.41
   2   2   0  127.38    6.76
   2   2   1   58.90    4.19
  -2  -2  -1   59.76    3.57
  -2  -2  -1   70.35    3.92
  -2  -2  -1   61.59    3.41
  -2  -2  -1   55.12    4.04
   2   2   1   57.88    3.53
   2   2   1   58.22    3.60
   2   2   2  907.89   26.04
   2   2   2  895.09   28.48
   2   2   2  922.55   27.96
   2   2   2  875.86   26.76
  -2  -2  -2  979.57   27.11
  -2  -2  -2  905.96   28.37
  -2  -2  -2  906.53   27.85
   2   2   3 4145.75  113.04
   2   2   3 4023.66  112.50
  -2  -2  -3 4165.19  110.70
   2   2   3 4026.30  110.52
   2   2   3 4152.19  112.87
  -2  -2  -3 4074.73  112.76
  -2  -2  -4   71.22    3.86
   2   2   4   82.70    5.09
   2   2   4   83.91    3.97
   2   2   4   70.60    4.93
   2   2   4   85.40    5.60
  -2  -2  -5  283.96    9.96
   2   2   5  276.97    9.68
   2   2   5  290.01   12.56
   2   2   5  299.09   12.12
   2   2   5  274.34    9.01
  -2  -2  -5  284.02    9.17
   2   2   5  279.81   11.84
   2   2   6 1088.13   35.19
  -2  -2  -6 1115.40   32.25
   2   2   6 1110.40   31.99
   2   2   6 1103.64   31.83
  -2  -2  -6 1106.95   31.93
   2   2   6 1052.10   34.66
   2   2   6 1122.02   30.91
  -2  -2  -6 1113.98   30.86
   2   2   6 1126.43   36.13
   2   2   7 2066.37   63.12
   2   2   7 2170.42   59.37
   2   2   7 2077.95   63.74
  -2  -2  -7 2185.95   60.61
   2   2   7 2156.99   60.29
  -2  -2  -7 2128.91   60.67
  -2  -2  -7 2285.70   63.83
  -2  -2  -7 2187.93   59.26
   2   2   7 2132.89   60.29
   2   2   7 2182.96   64.90
  -2  -2  -8  758.17   27.74
  -2  -2  -8  754.02   26.46
  -2  -2  -8  762.51   24.44
   2   2   8  769.97   23.13
   2   2   8  771.08   27.14
   2   2   8  727.99   26.18
  -2  -2  -8  721.22   23.72
  -2  -2  -8  746.83   22.91
   2   2   8  748.79   24.03
   2   2   9  109.38    7.79
   2   2   9   93.22    5.75
  -2  -2  -9  105.66    7.24
   2   2   9   90.00    5.22
  -2  -2  -9   97.58    6.02
  -2  -2  -9   95.74    5.58
   2   2   9   96.09    7.67
  -2  -2  -9  107.22    8.05
   2   2   9   80.65    6.40
   2   2  10   63.02    4.75
  -2  -2 -10   43.34    3.79
  -2  -2 -10   40.54    5.08
   2   2  10   43.03    3.75
  -2  -2 -10   40.86    4.00
   2   2  10   42.97    4.63
  -2  -2 -10   48.07    3.75
   2   2  10   44.37    5.14
   2   2  10   51.23    5.58
  -2  -2 -10   47.84    4.95
  -2  -2 -11   12.66    2.50
  -2  -2 -11   12.10    2.26
  -2  -2 -11   13.14    2.07
   2   2  11   13.50    2.68
   2   2  11   15.24    3.01
   2   2  11   13.66    2.44
   2   2  11    9.78    2.55
  -2  -2 -11   11.20    1.93
  -2  -2 -11   14.29    3.22
  -2  -2 -12  227.56   10.74
  -2  -2 -12  212.52   13.45
  -2  -2 -12  229.69   12.49
   2   2  12  213.59   10.50
   2   2  12  203.40   12.75
   2   2  12  197.04   11.61
  -2  -2 -12  214.61   10.26
   2   2  12  215.49   13.48
  -2  -2 -12  206.26   11.32
  -2  -2 -13  351.47   15.10
  -2  -2 -13  358.70   17.05
   2   2  13  374.68   15.51
   2   2  13  371.96   19.03
  -2  -2 -13  348.02   16.38
  -2  -2 -13  335.51   14.66
   2   2  13  332.36   16.54
   2   2  13  367.87   16.42
  -2  -2 -13  333.02   18.21
   2   2  13  345.34   17.99
   2   2  14  171.52   10.98
  -2  -2 -14  183.66   10.33
  -2  -2 -14  195.04   11.98
   2   2  14  185.71   10.52
  -2  -2 -14  217.01   12.40
   2   2  14  197.79   13.60
  -2  -2 -14  190.74   10.47
   2   2  14  204.57   12.19
   2   2  14  184.68   12.81
  -2  -2 -14  195.96   13.62
   2   2  15  257.11   13.54
   2   2  15  269.11   14.60
  -2  -2 -15  270.50   14.90
  -2  -2 -15  257.35   13.24
   2   2  15  272.63   16.32
  -2  -2 -15  270.72   13.43
   2   2  15  270.98   14.91
   2   2  15  250.93   16.39
  -2  -2 -15  275.19   17.05
   2   2  16  732.36   32.14
  -2  -2 -16  797.59   33.51
   2   2  16  777.26   29.02
  -2  -2 -16  790.51   28.80
  -2  -2 -16  724.23   30.26
   2   2  16  748.81   29.96
  -2  -2 -16  743.38   28.24
  -2  -2 -17  365.46   21.47
   2   2  17  349.19   20.66
   2   2  17  396.98   18.62
   2   2  17  400.38   19.90
  -2  -2 -17  354.01   19.39
  -2  -2 -17  383.79   18.03
  -2  -2 -17  396.86   18.30
   2   2  17  407.91   19.62
   2   2  18  298.79   18.77
  -2  -2 -18  281.24   18.46
  -2  -2 -18  259.83   14.69
  -2  -2 -18  258.75   16.52
   2   2  18  265.42   15.79
   2   2  18  275.19   15.47
   2   2  18  289.40   16.65
  -2  -2 -18  273.54   15.07
  -2  -2 -19  200.39   15.69
   2   2  19  215.33   16.00
   2   2  19  209.63   13.84
   2   2  19  182.59   12.73
  -2  -2 -19  180.16   12.26
   2   2  19  230.97   14.96
[truncated: 781,350 more chars]
