# Supplementary material
Source: MDPI journal article supplement (https://www.mdpi.com/2304-6740/7/4/44)
Supplement: s1 [file s1 › Thermal (TGA)and Spectroscopic (NMR, IR) ESI.pdf]

Thermal Analysis and Spectroscopic analysis: Electronic Supplementary information.

**Compounds**

- 1**      $[\text{Zn}\{\kappa^3\text{O-B}_6\text{O}_7(\text{OH})_6\}(\kappa^3\text{N-dien})] \cdot 0.5\text{H}_2\text{O}$  (dien =  $\text{NH}(\text{CH}_2\text{-CH}_2\text{NH}_2)_2$ )
- 2**      $(\text{NH}_4)_2[\text{Zn}\{\kappa^2\text{O-B}_6\text{O}_7(\text{OH})_6\}_2(\text{H}_2\text{O})_2] \cdot 2\text{H}_2\text{O}$
- 3**      $(1,3\text{-pnH}_2)_3[(\kappa^1\text{N-H}_3\text{N}\{\text{CH}_2\}_3\text{NH}_2) \text{Zn}\{\kappa^3\text{O-B}_{12}\text{O}_{18}(\text{OH})_6\}]_2 \cdot 14\text{H}_2\text{O}$  (1,3-pn = 1,2-diaminopropane).

**Content**

TGA of **1**, **2**, and **3**

$^{11}\text{B}$ ,  $^1\text{H}$ ,  $^{13}\text{C}$  NMR and IR of **1**

$^{11}\text{B}$  NMR and IR of **2**

$^{11}\text{B}$ ,  $^1\text{H}$ ,  $^{13}\text{C}$  NMR and IR of **3**

TGA Plots for 1, 2, and 3

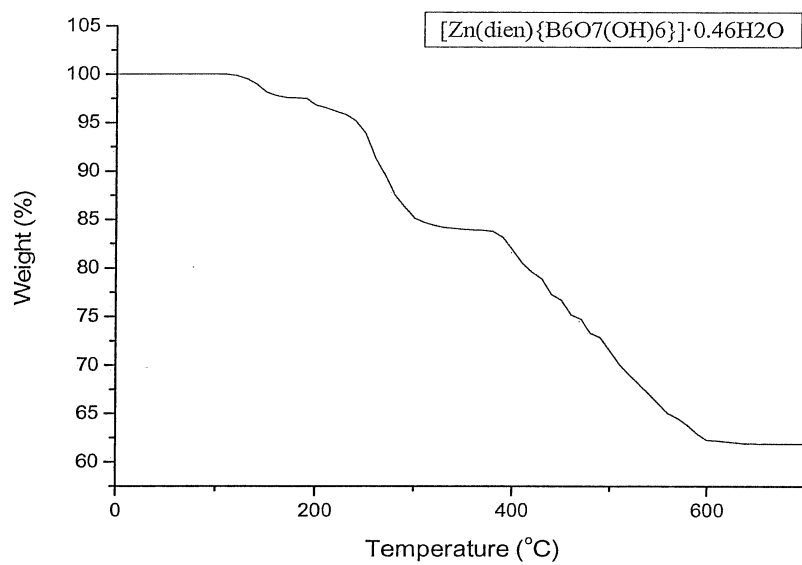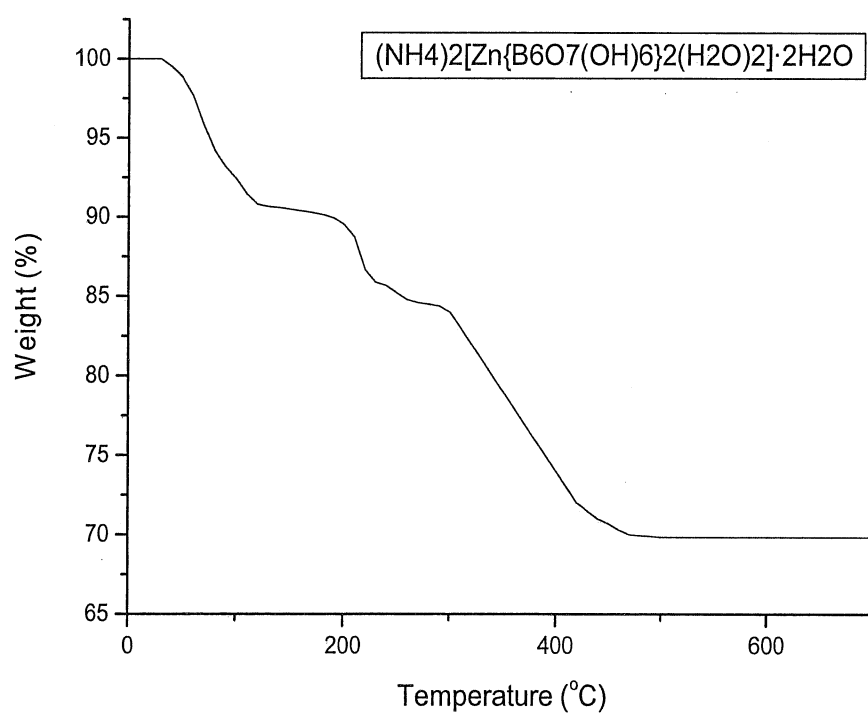

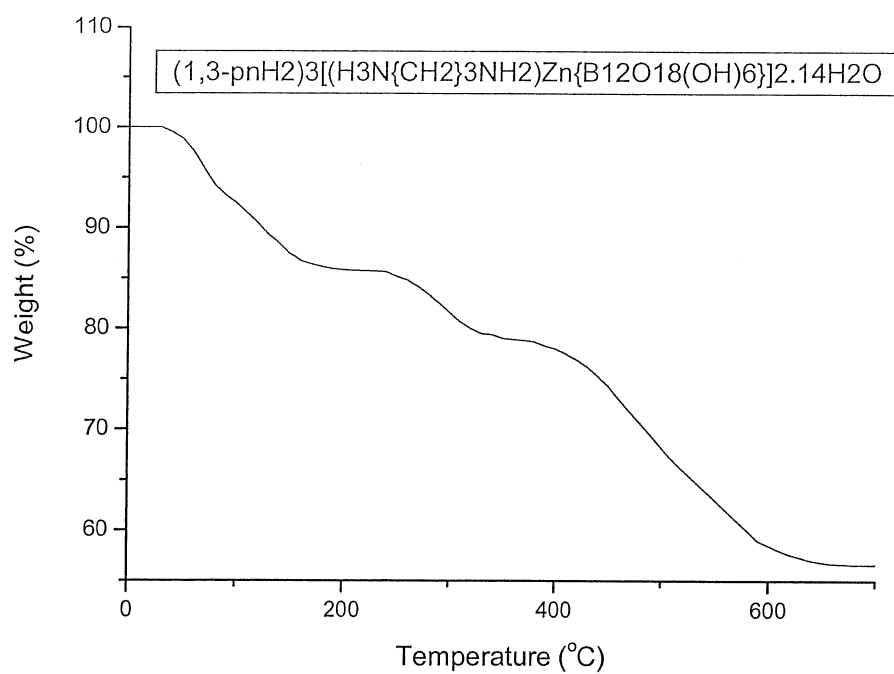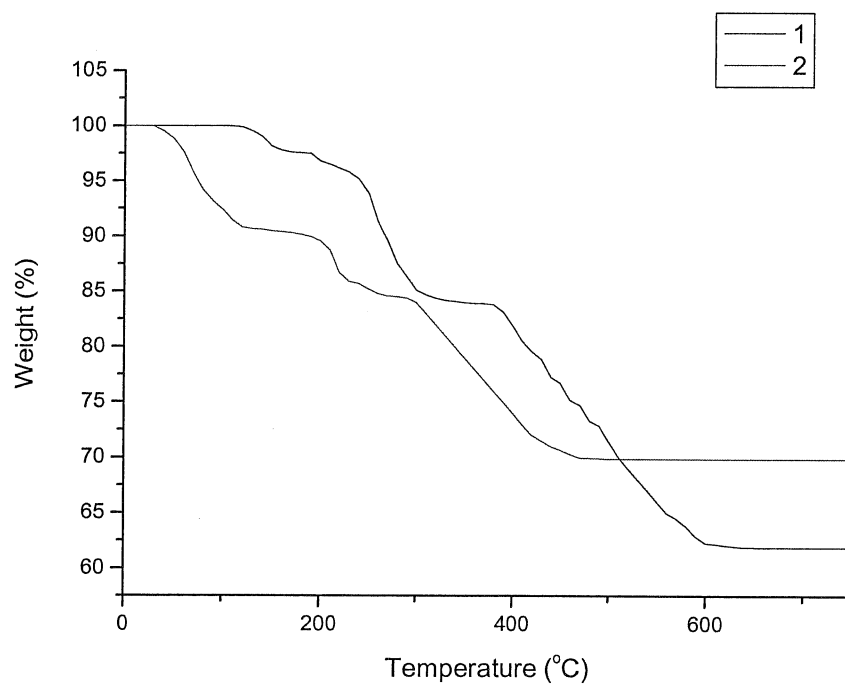

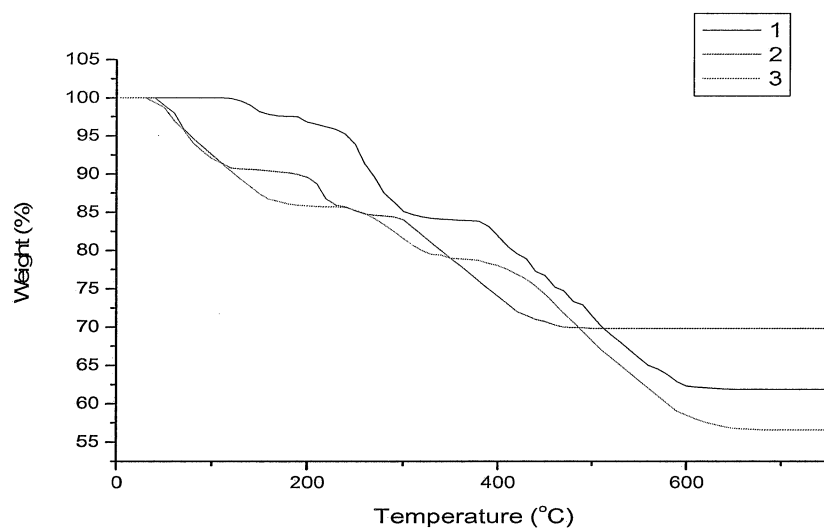

Supervisor Name MAB

Zn+Dien+B

B11CPD.b D2O {C:\Bruker\TopSpin3.2} MAB 10

"B 1

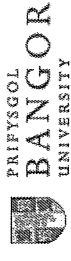

17.42  
0.42

Current Data Parameters  
NAME Nov15-2016-MAB  
EXPNO 6  
PROCNO 1  
F2 - Acquisition Parameters  
Date\_ 20161115  
Time\_ 12.38  
INSTRUM spect  
PROBHD 5 mm PAB90 BB/  
PULPROG zgpg30baseopt  
TD 8192  
SOLVENT D2O  
NS 16  
DS 0  
SWH 25510.203 Hz  
FIDRES 18.76038 Hz  
AQ 0.1656302 sec  
RG 209.34  
DW 19.600 usec  
DE 9.85 usec  
TE 295.7 K  
D1 1.00000000 sec  
D11 0.03000000 sec  
TD0 1  
===== CHANNEL f1 =====  
SFO1 128.3776054 MHz  
NUC1 1H  
P1 9.50 usec  
PL1 19.00 usec  
PLW1 50.00000000 W  
===== CHANNEL f2 =====  
SFO2 400.1324710 MHz  
NUC2 1H  
CPDPRG2 waltz16  
PCPD2 90.00 usec  
PLW2 28.00000000 W  
PLW12 0.33199000 W  
F2 - Processing parameters  
SF 377.6038 MHz  
WDW EM  
SSB 0  
LB 10.00 Hz  
GB 0  
PC 2.00

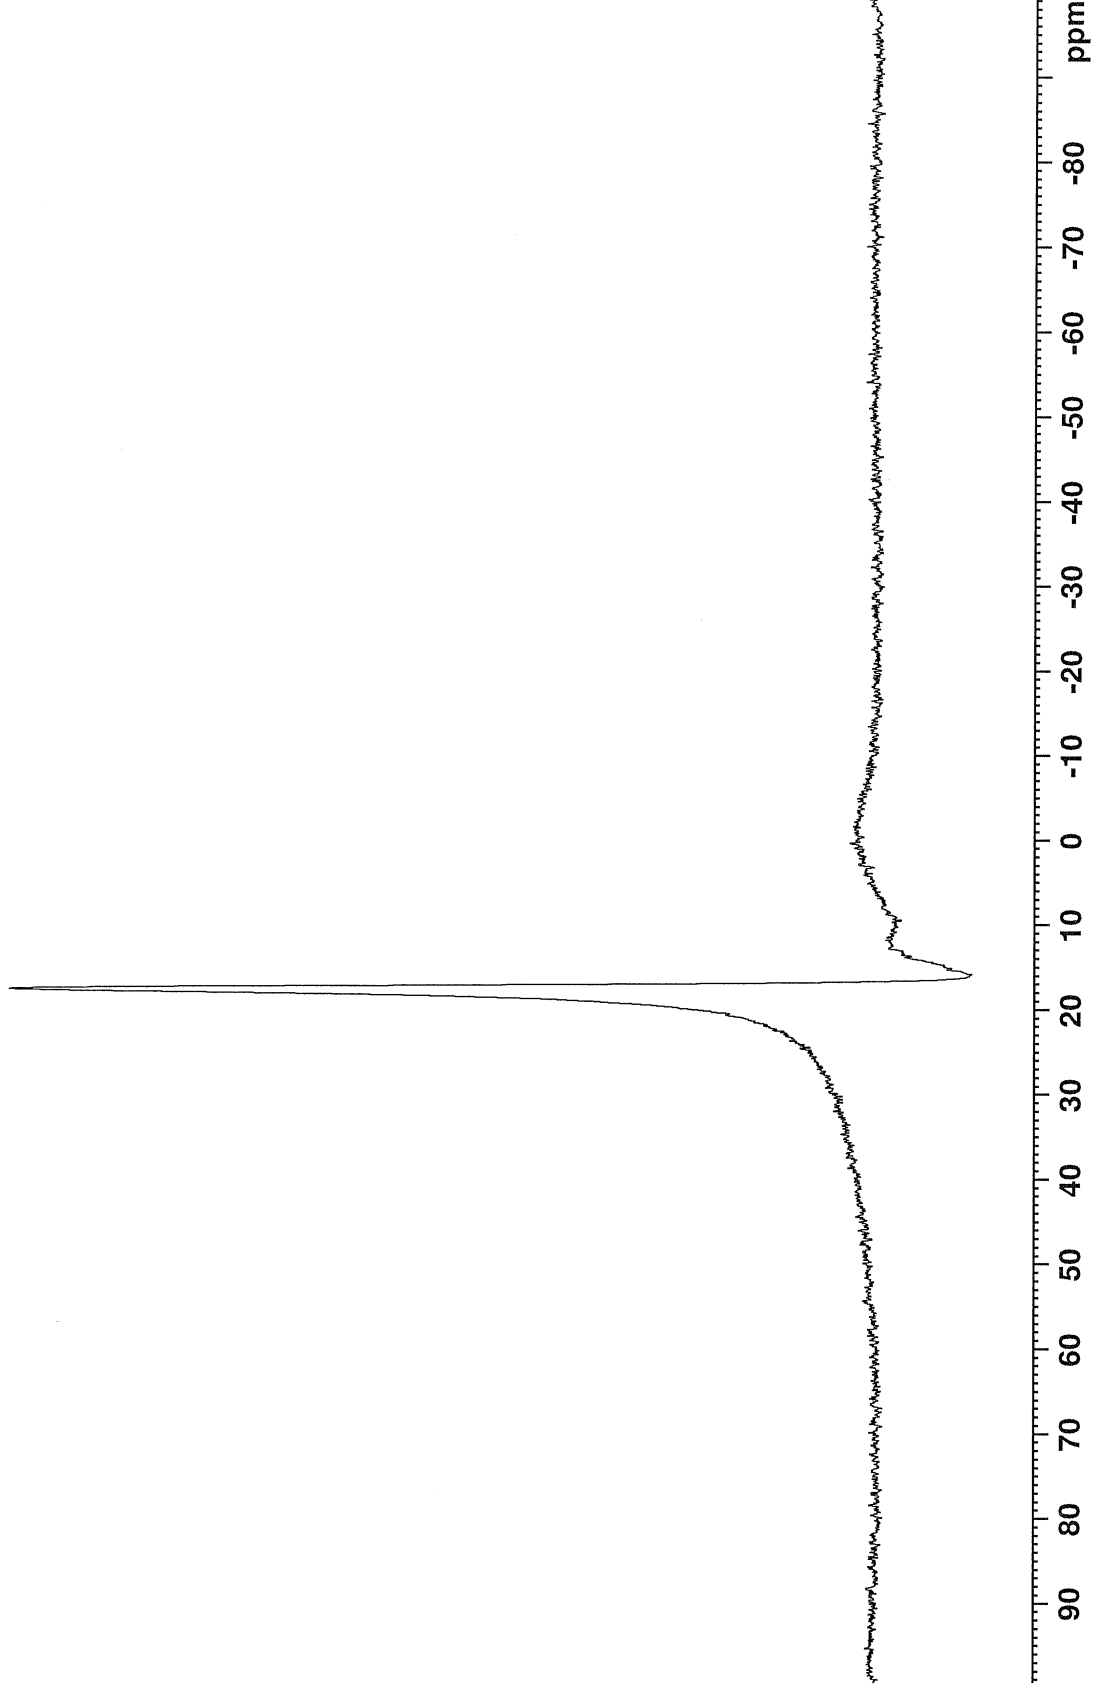

Supervisor Name MAB  
Zn+Dien+B  
PROTON.b D2O {C:\Bruker\TopSpin3.2} MAB 10

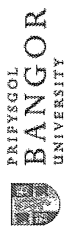

<sup>1</sup>H  
|  
—

Current Data Parameters  
NAME Nov15-2016-MAB  
EXPNO 5  
PROCNO 1

F2 - Acquisition Parameters  
Date\_ 20161115  
Time 12.37  
INSTRUM spect  
PROBHD 5 mm PABBO BB/  
PULPROG zg30  
TD 65536  
SOLVENT D2O  
NS 16  
DS 0  
SWH 8223.685 Hz  
FIDRES 0.125483 Hz  
AQ 3.9845889 sec  
RG 209.34  
DW 60.800 usec  
DE 16.87 usec  
TE 295.7 K  
D1 1.00000000 sec  
TD0 1

===== CHANNEL f1 =====  
SFO1 400.1324008 MHz  
NUC1 1H  
P1 10.00 usec  
PLW1 28.00000000 W

F2 - Processing parameters  
SI 65536  
SF 400.1300000 MHz  
WDW EM  
SSB 0  
LB 0.30 Hz  
GB 0  
PC 1.00

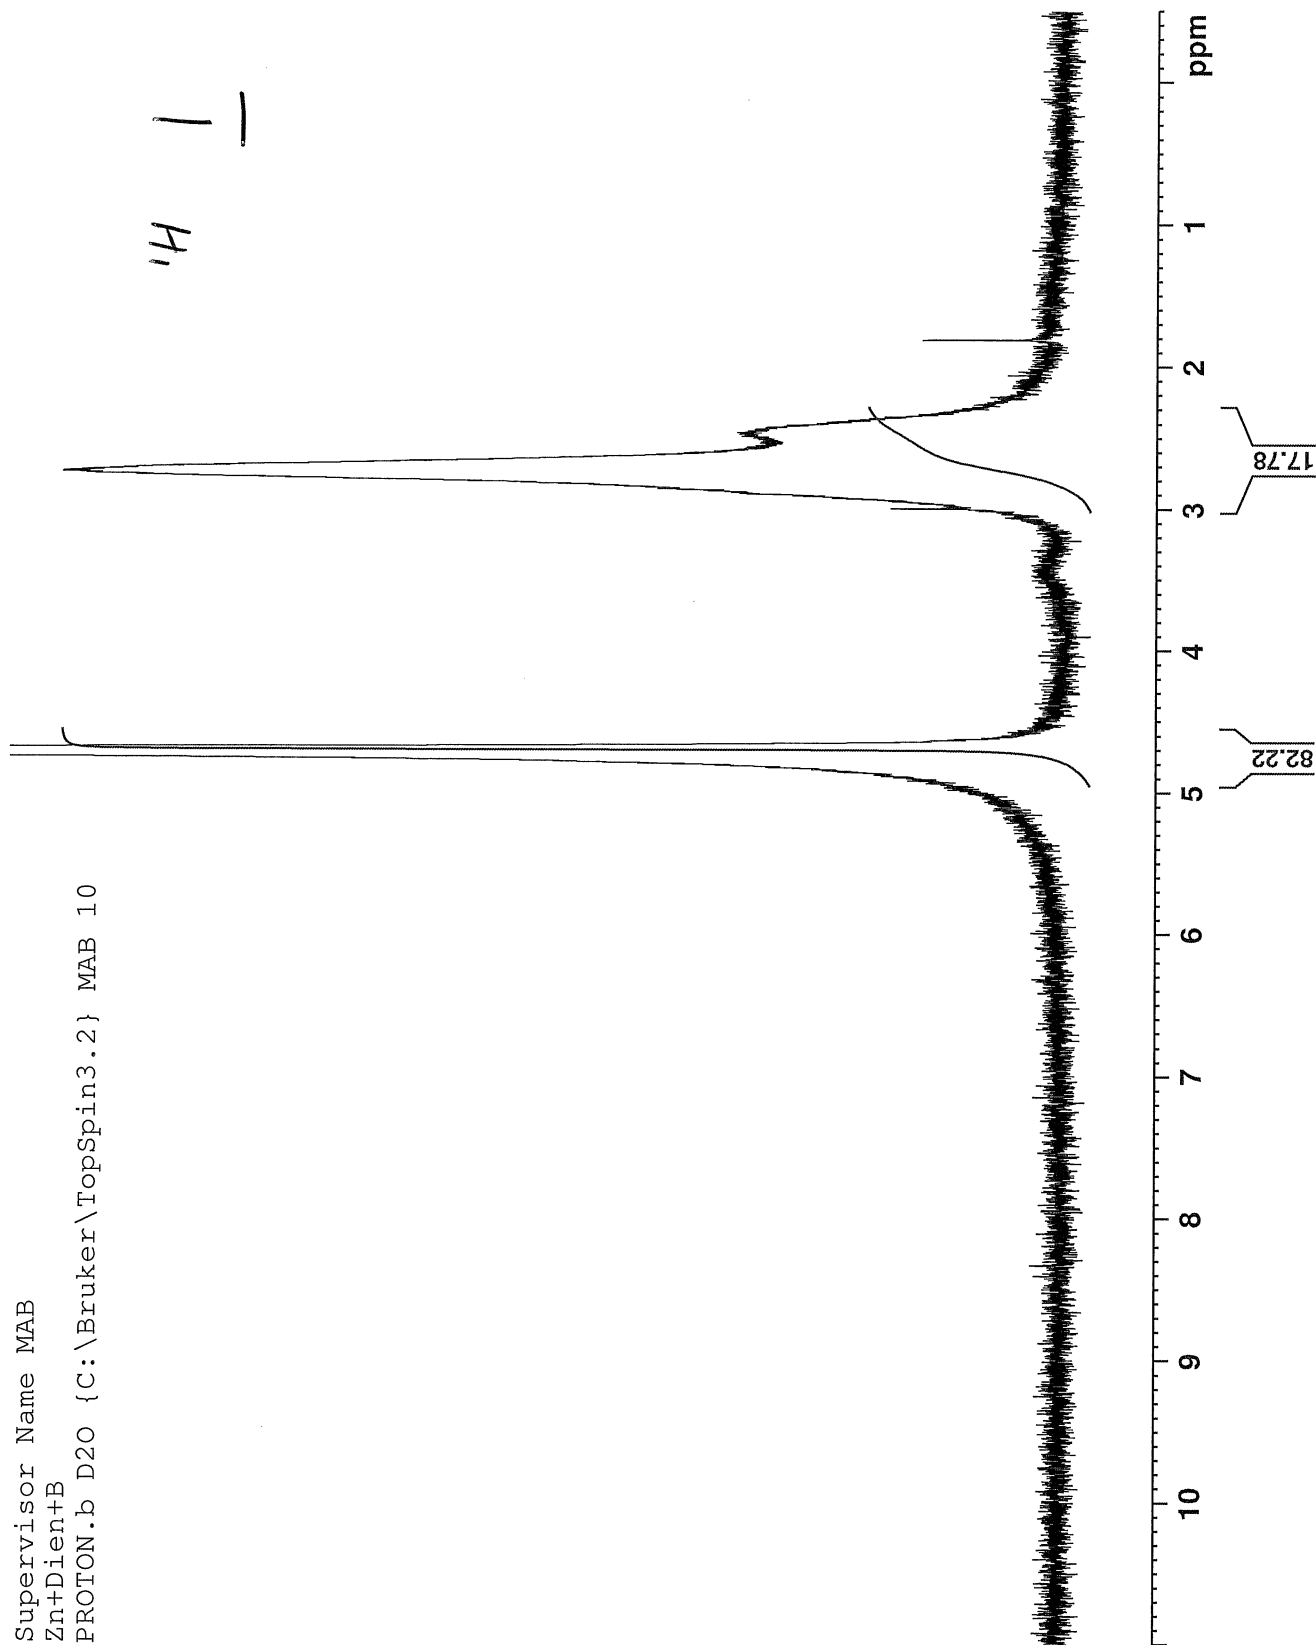

Supervisor Name MAB

Zn+Dien+B

55minDEPTQ.b D2O {C:\Bruker\TopSpin3.2} MAB 10

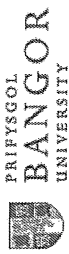

13C 1

38.10

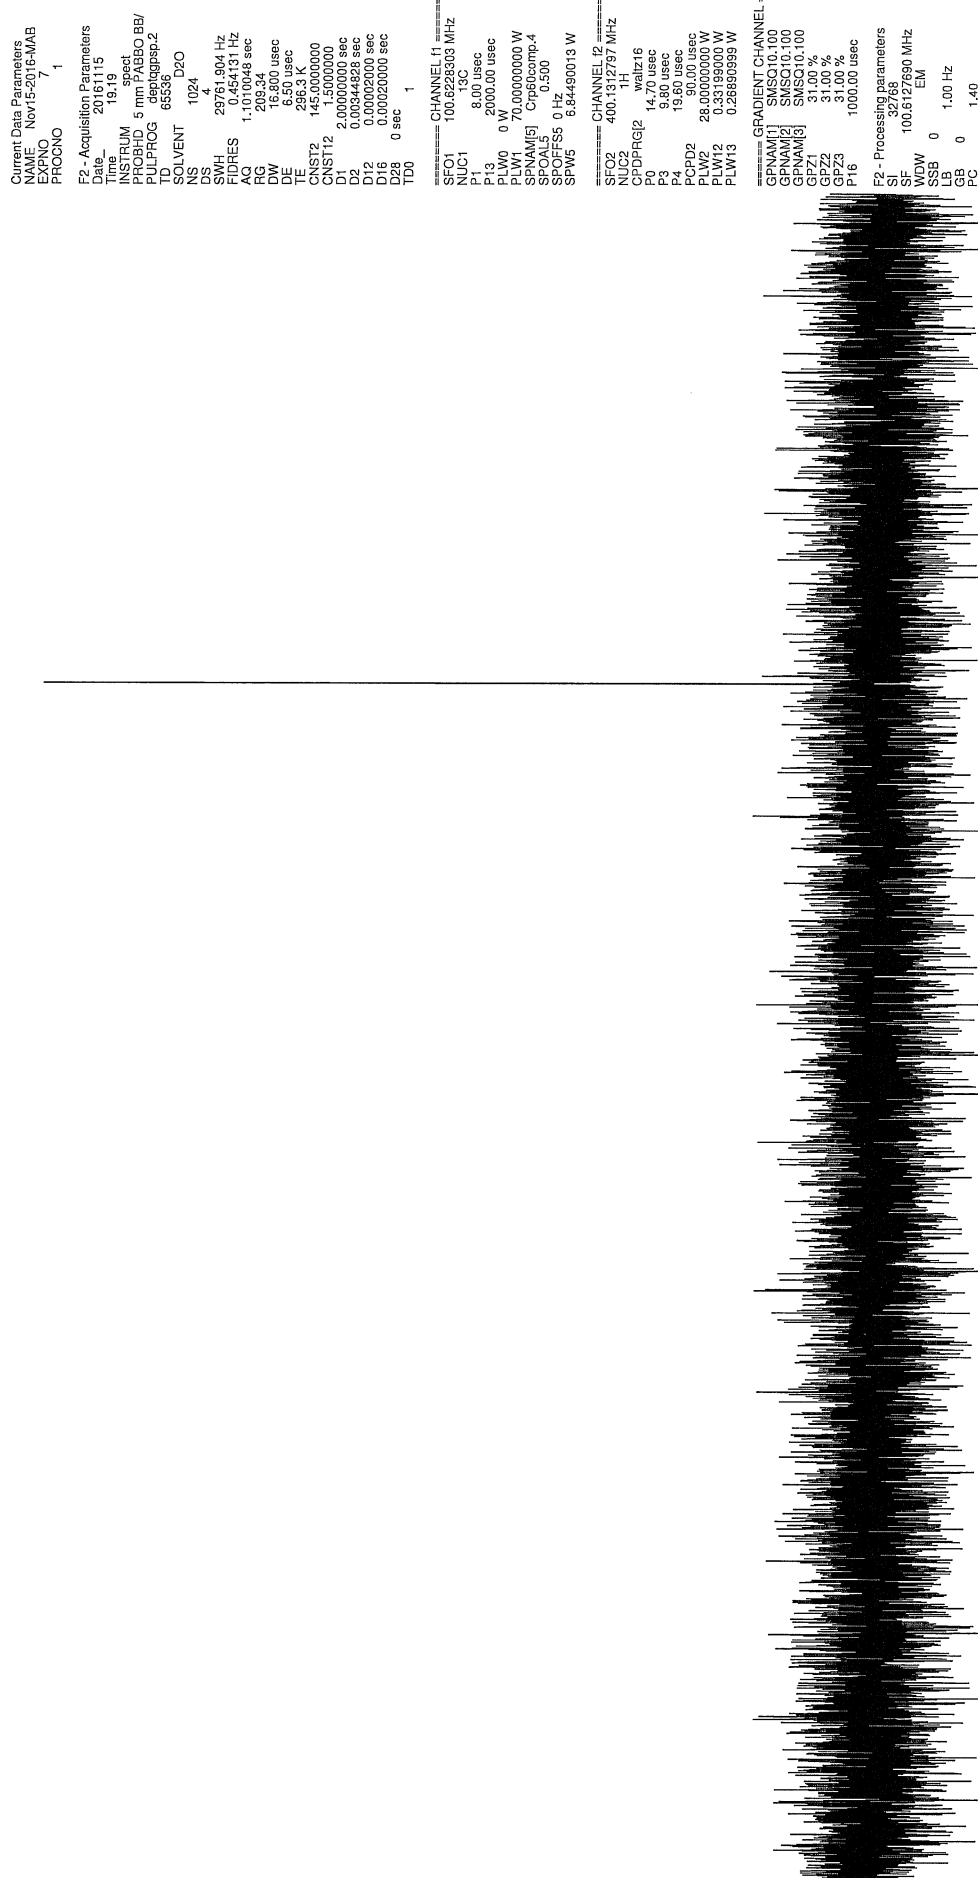

IR 1

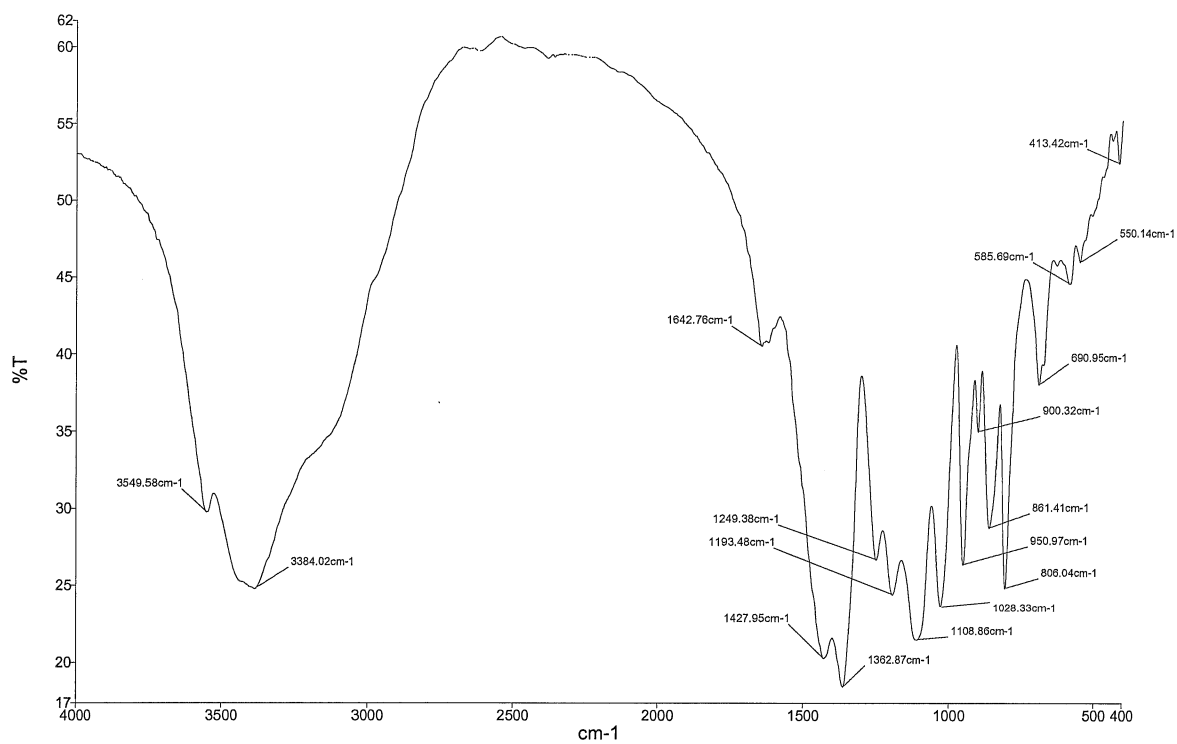

Zn+Dien+B OK

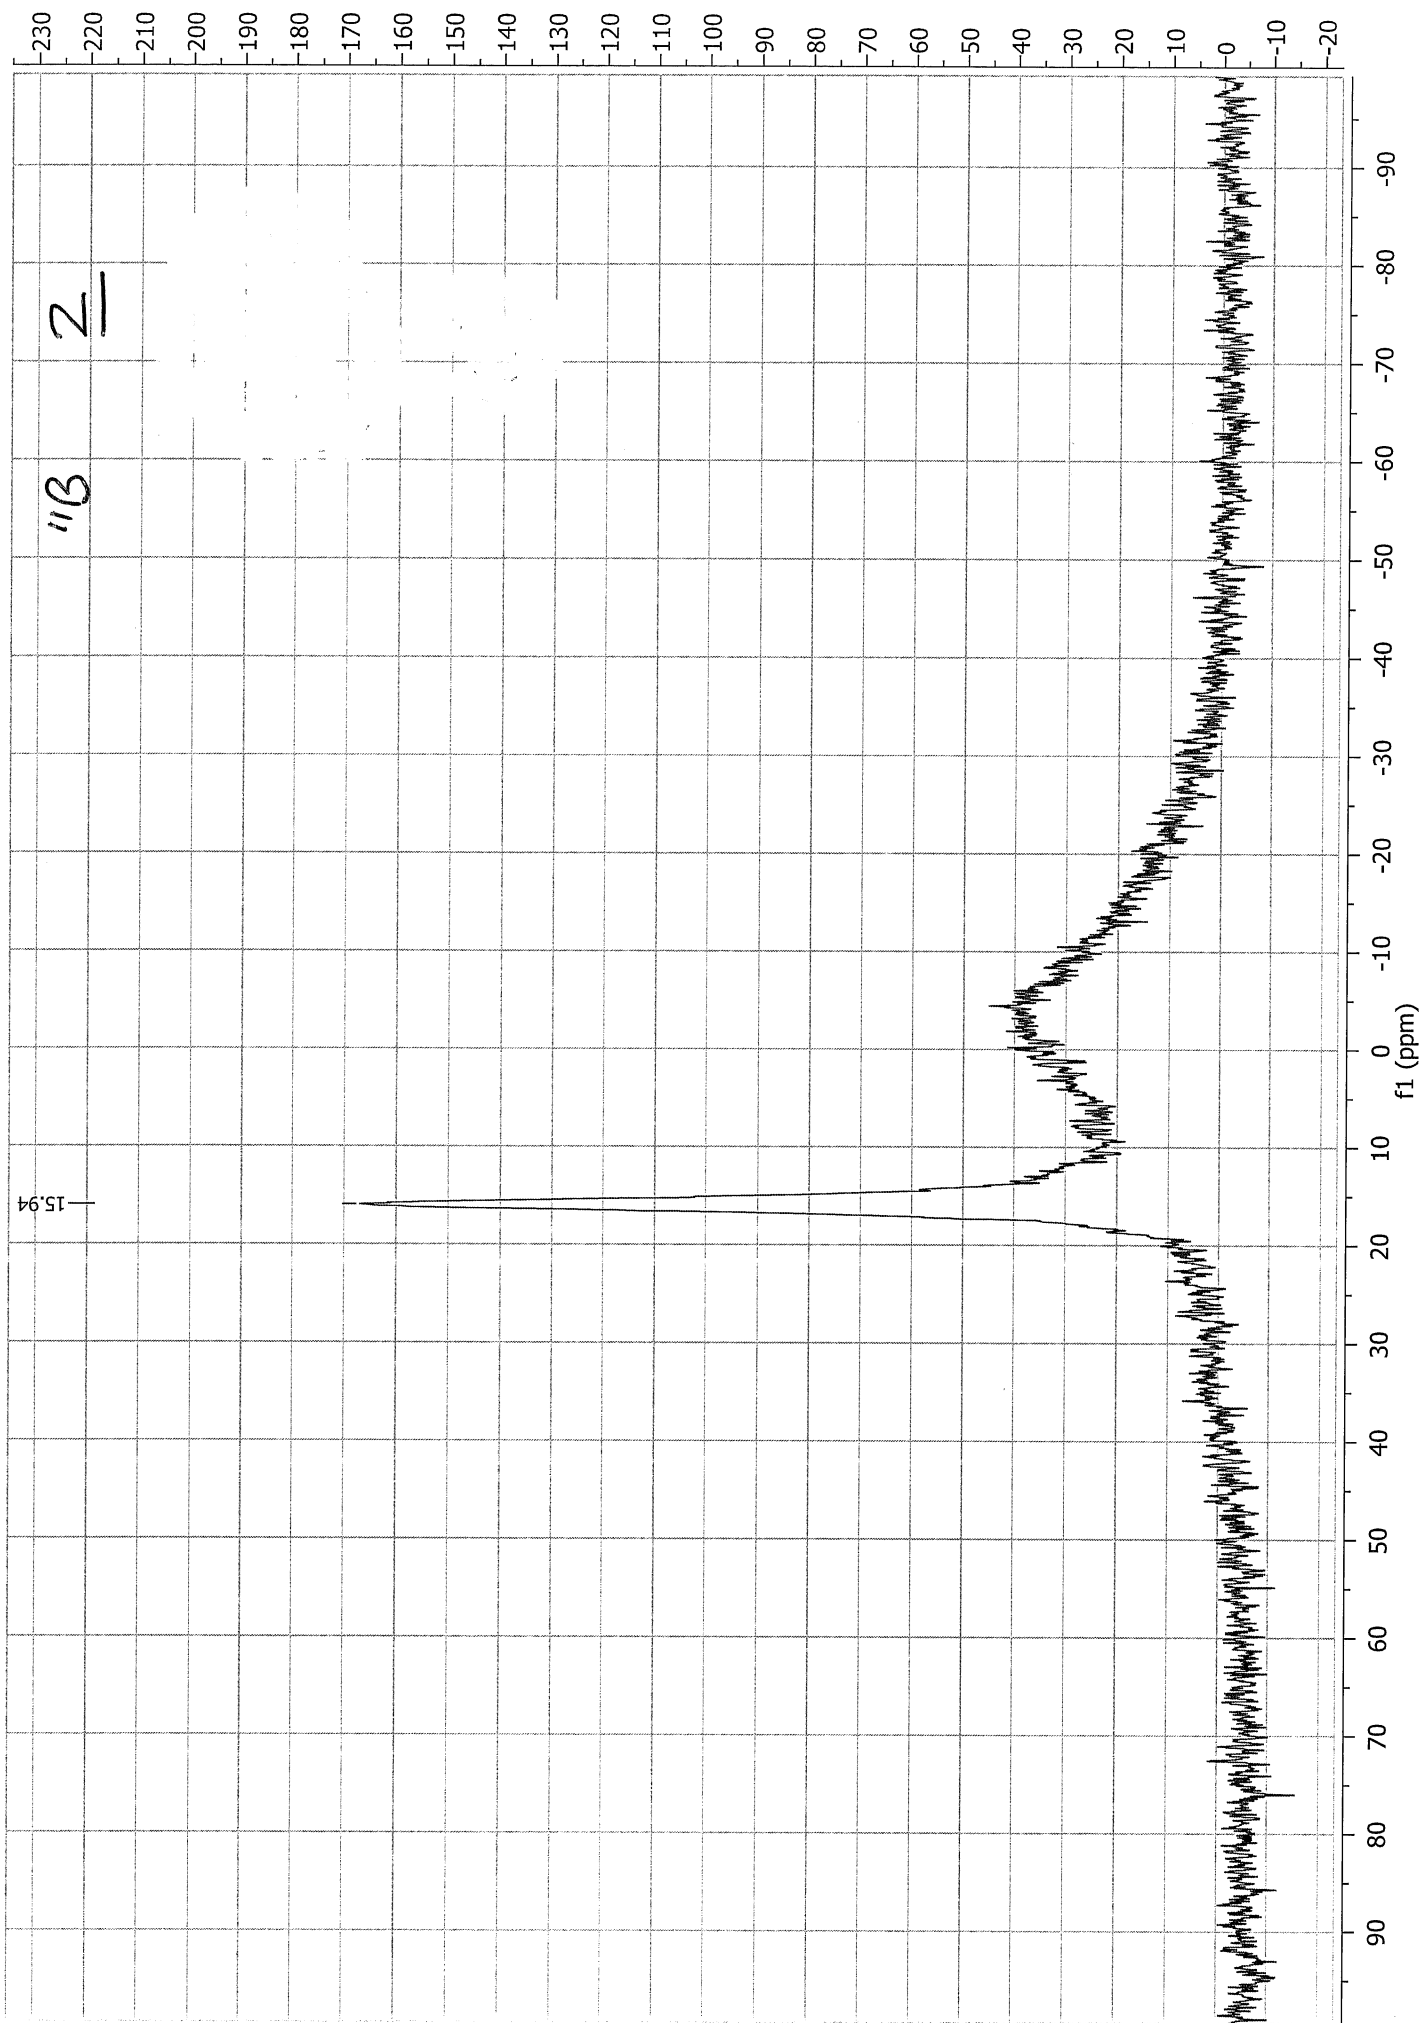

IR 2

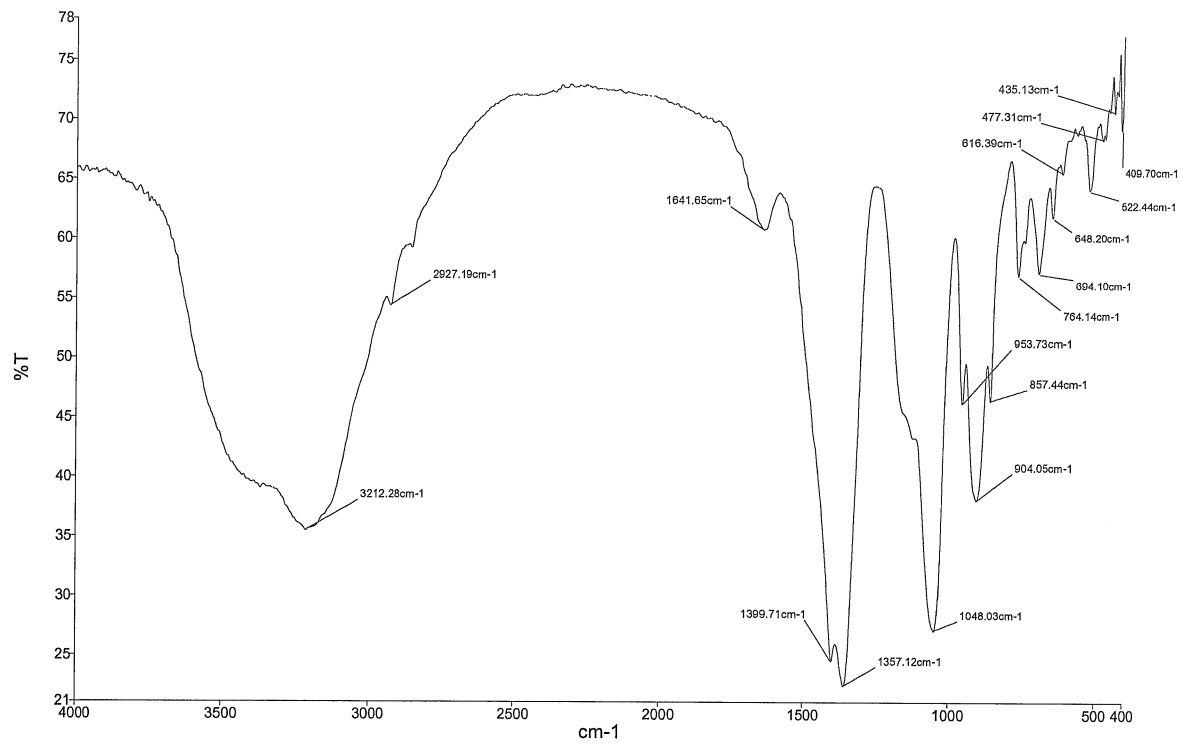

Zn+NH3+B

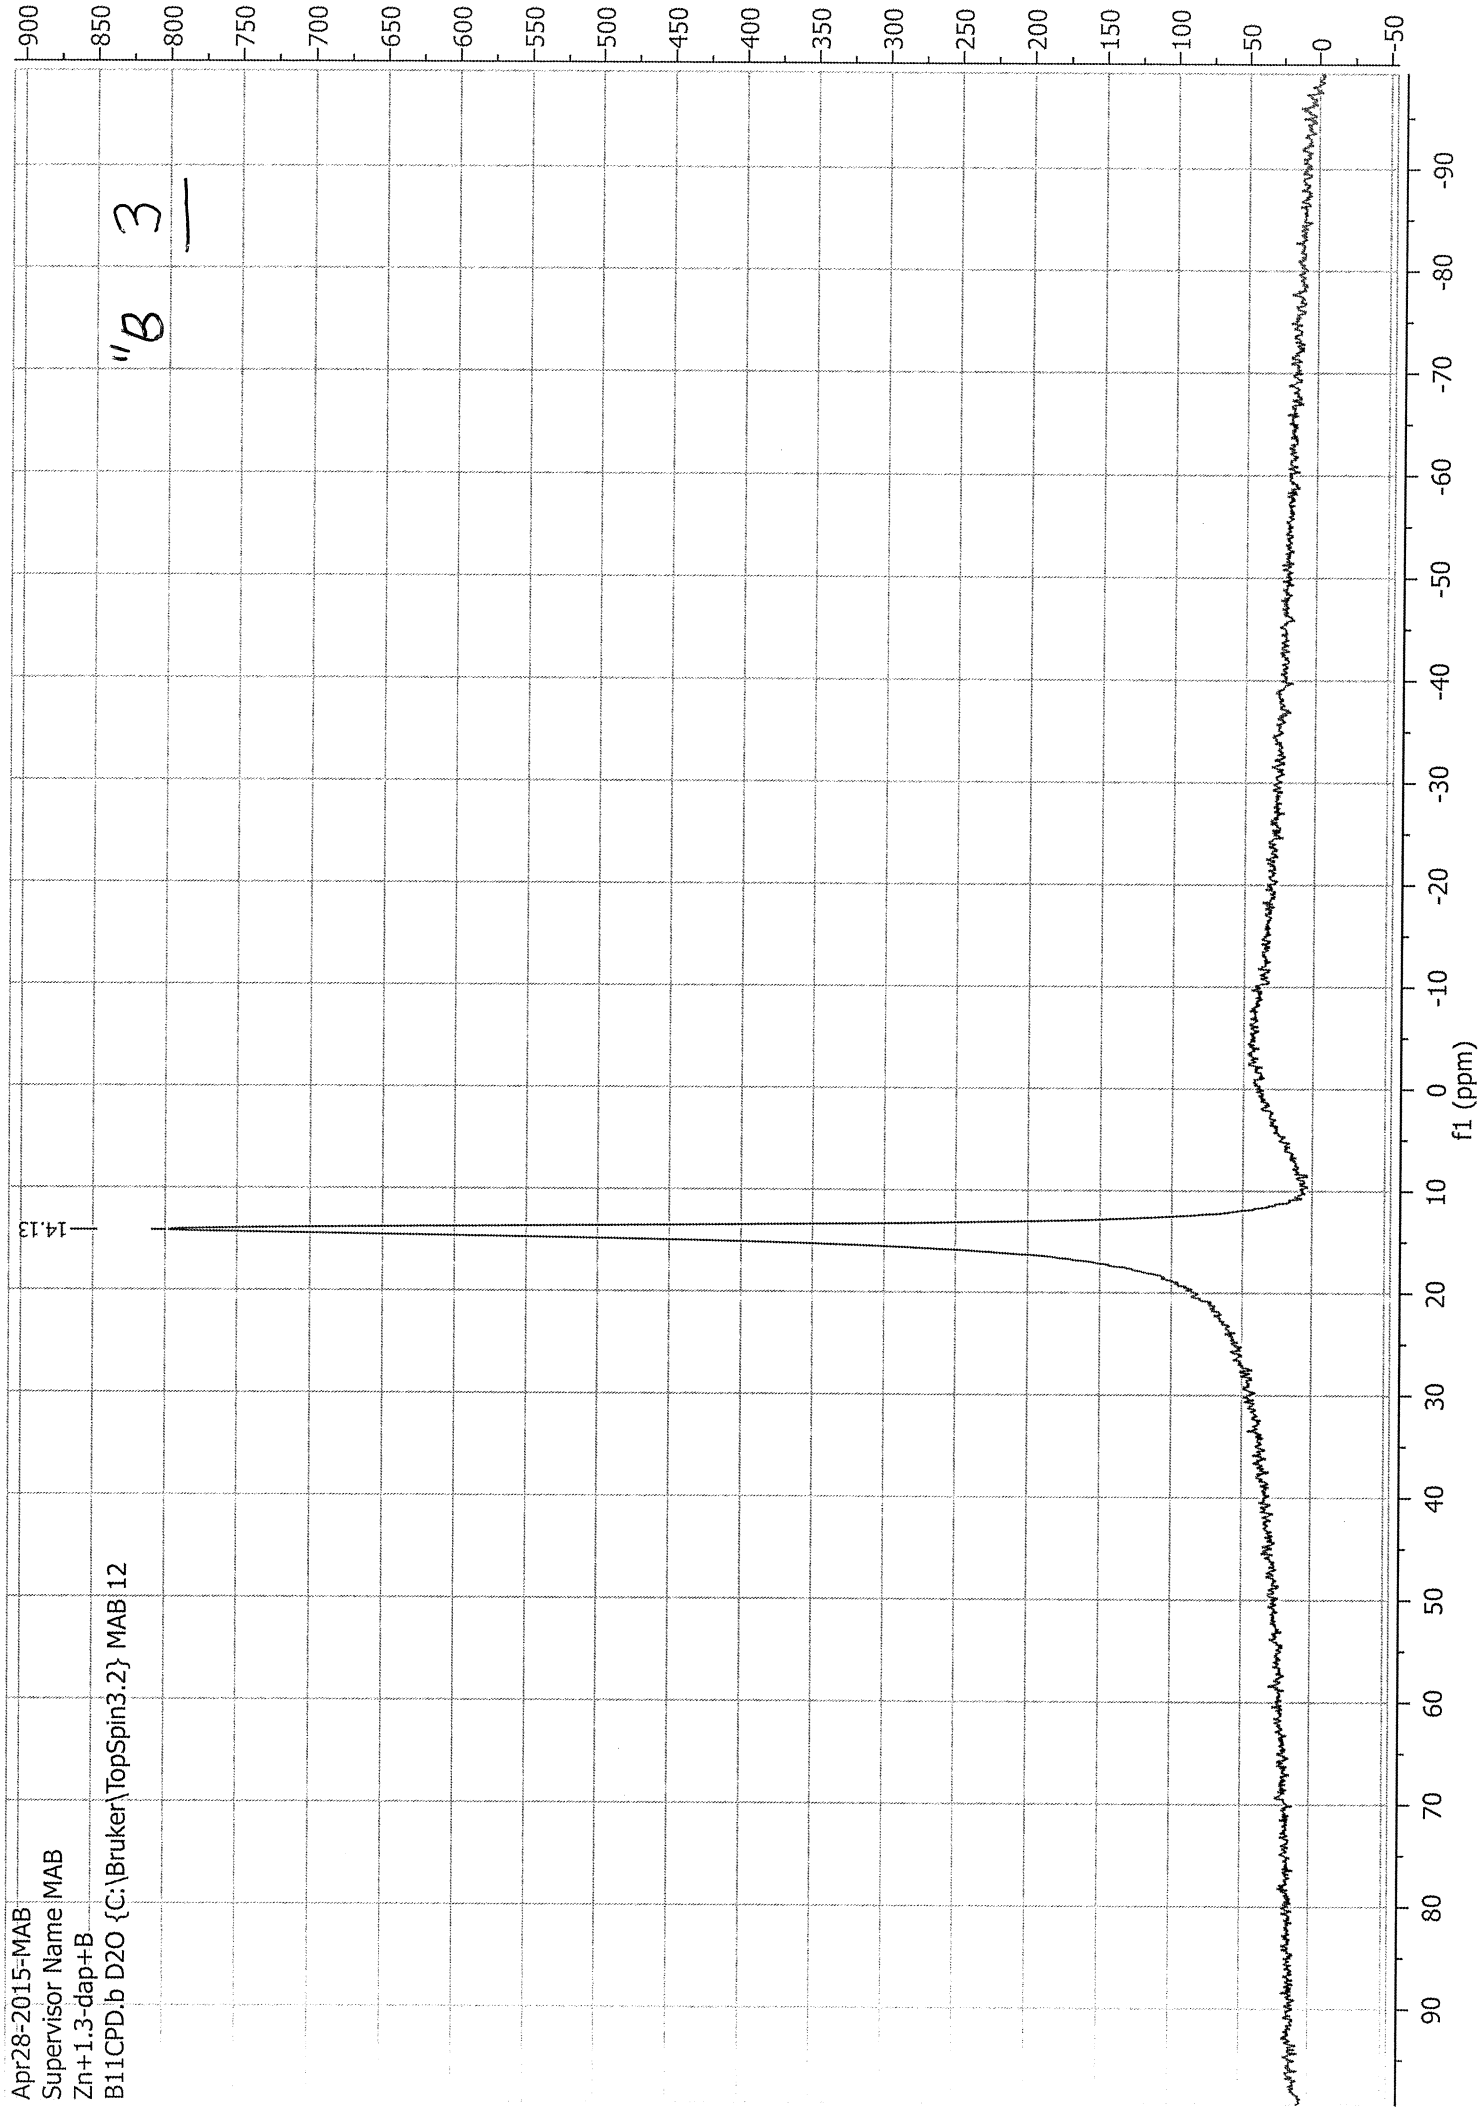

Apr28-2015-MAB

Supervisor Name MAB

Zn+1.3-dap+B

B11ICPD.b D2O {C:\Bruker\TopSpin3.2} MAB 12

Apr28-2015-MAB  
Supervisor Name MAB  
Zn+1.3-dap+B  
PROTON.b D2O {C:\Bruker\TopSpin3.2} MAB 12

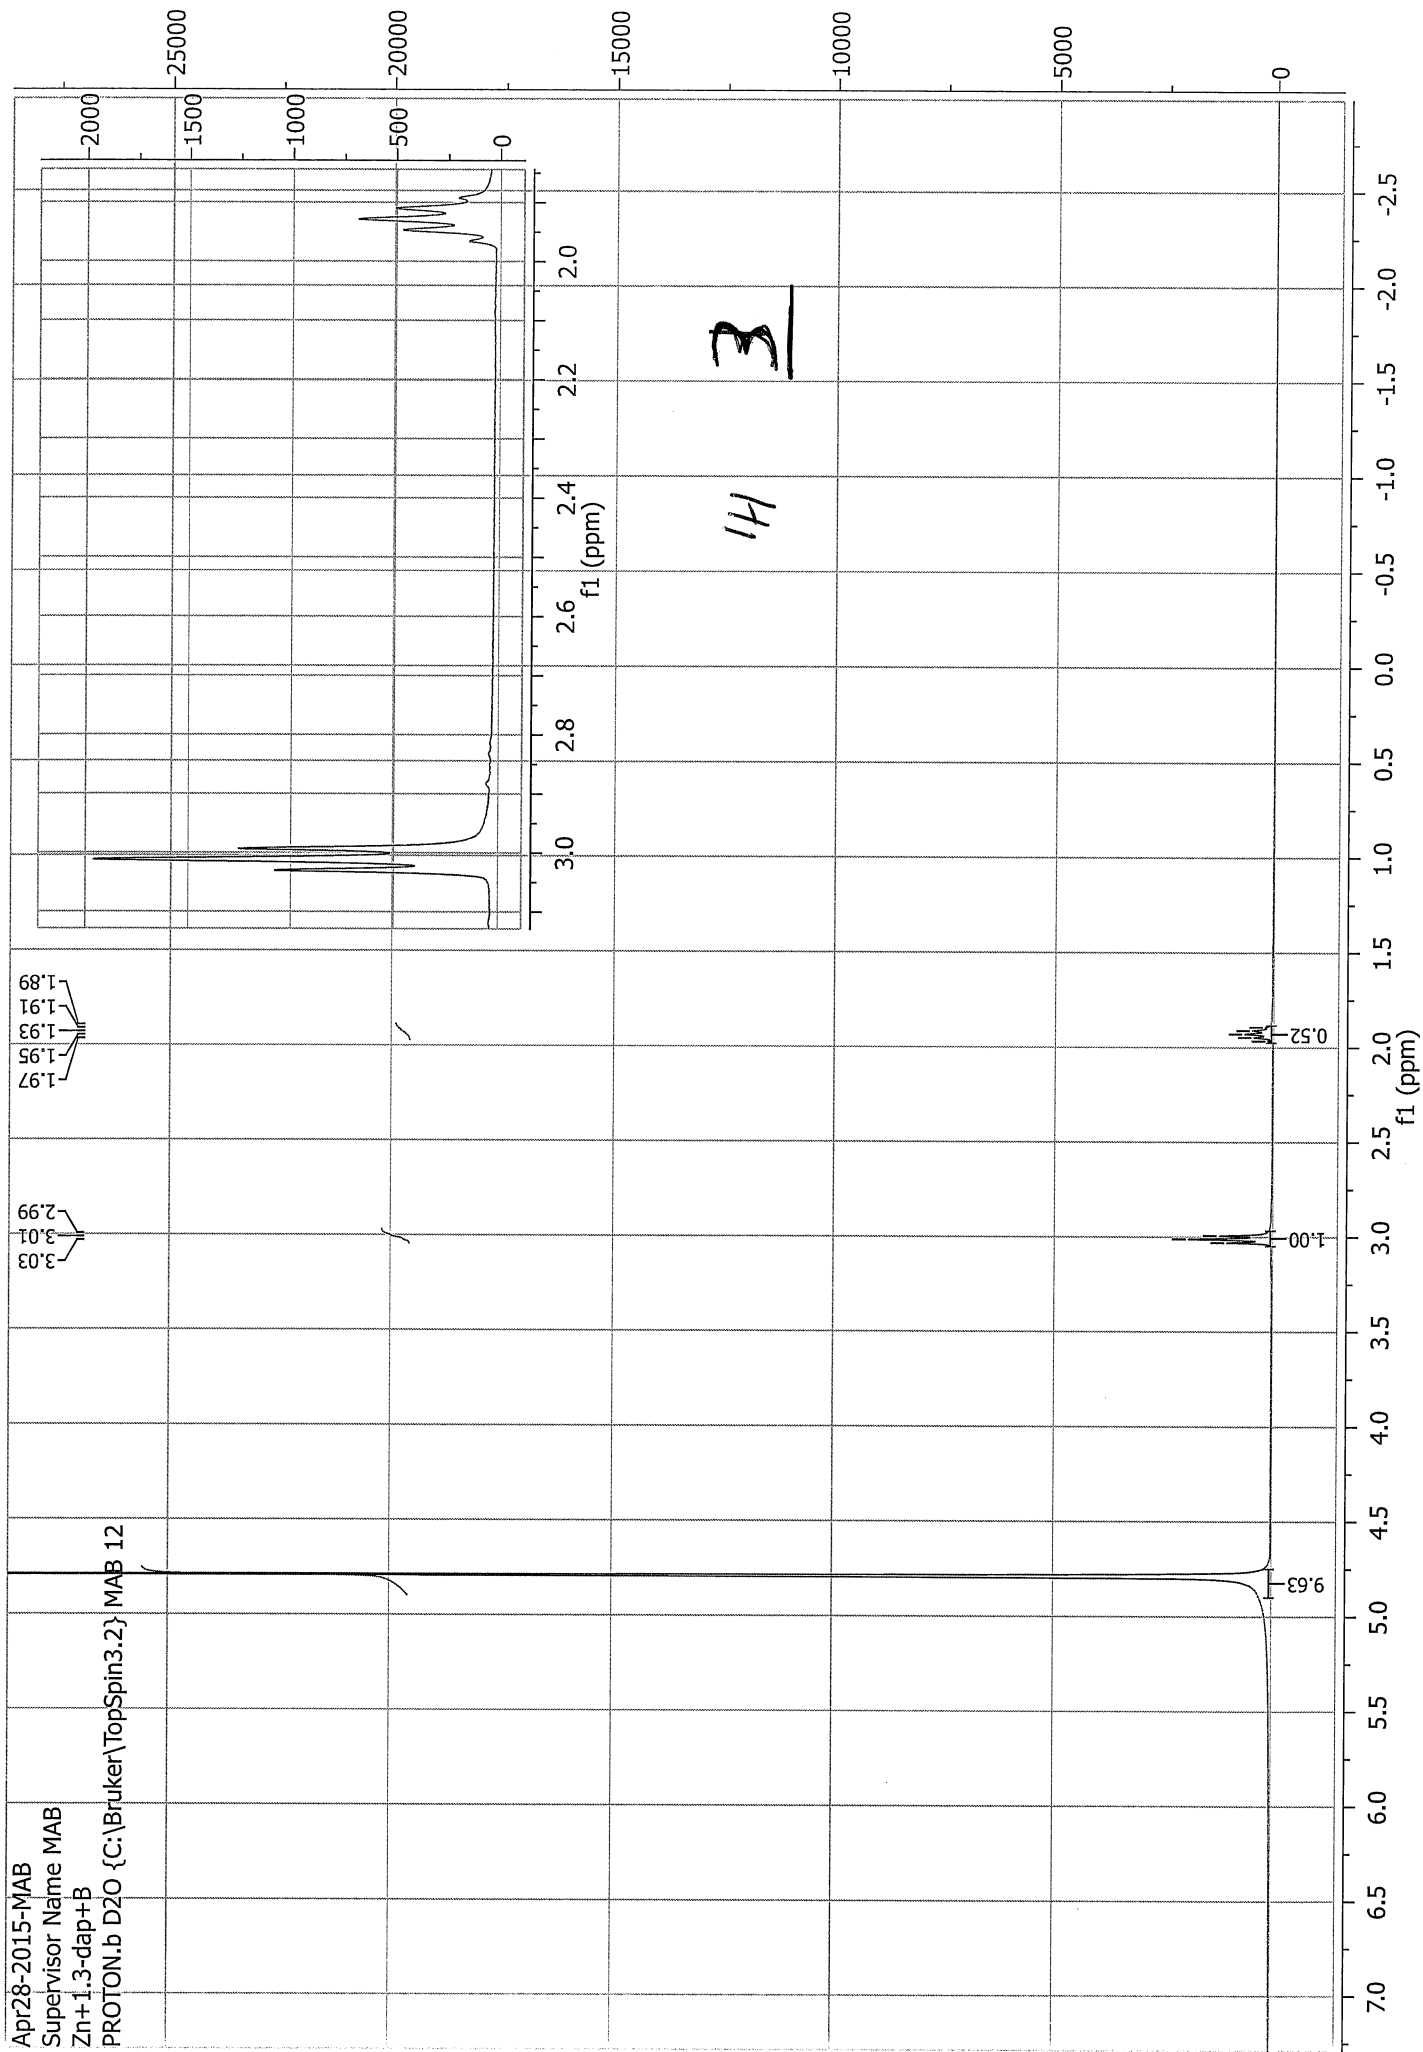

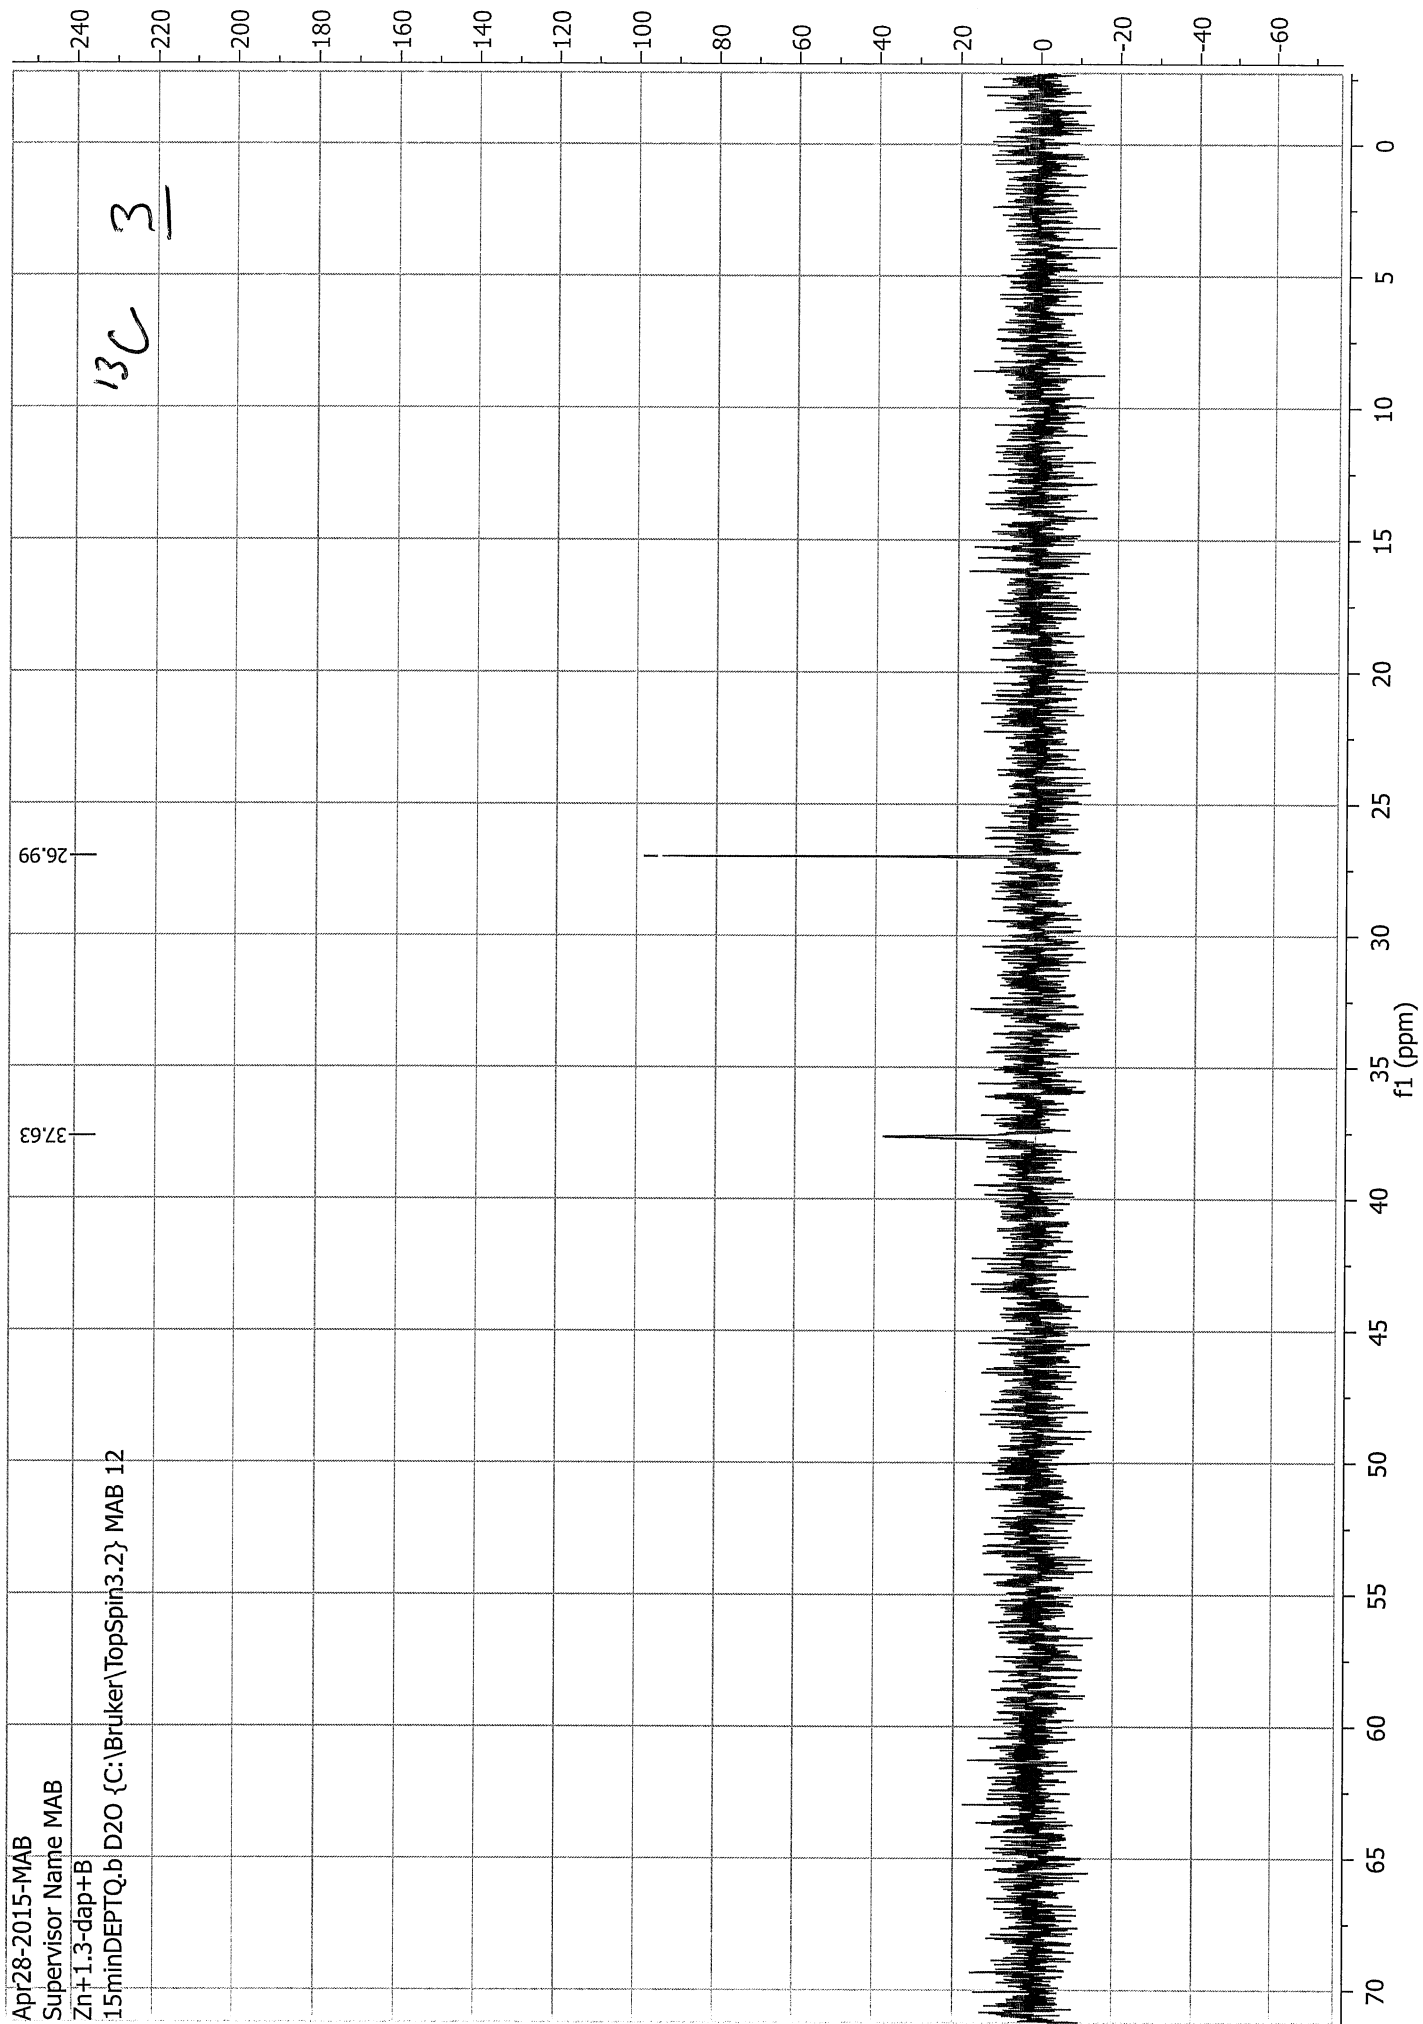

IR 3

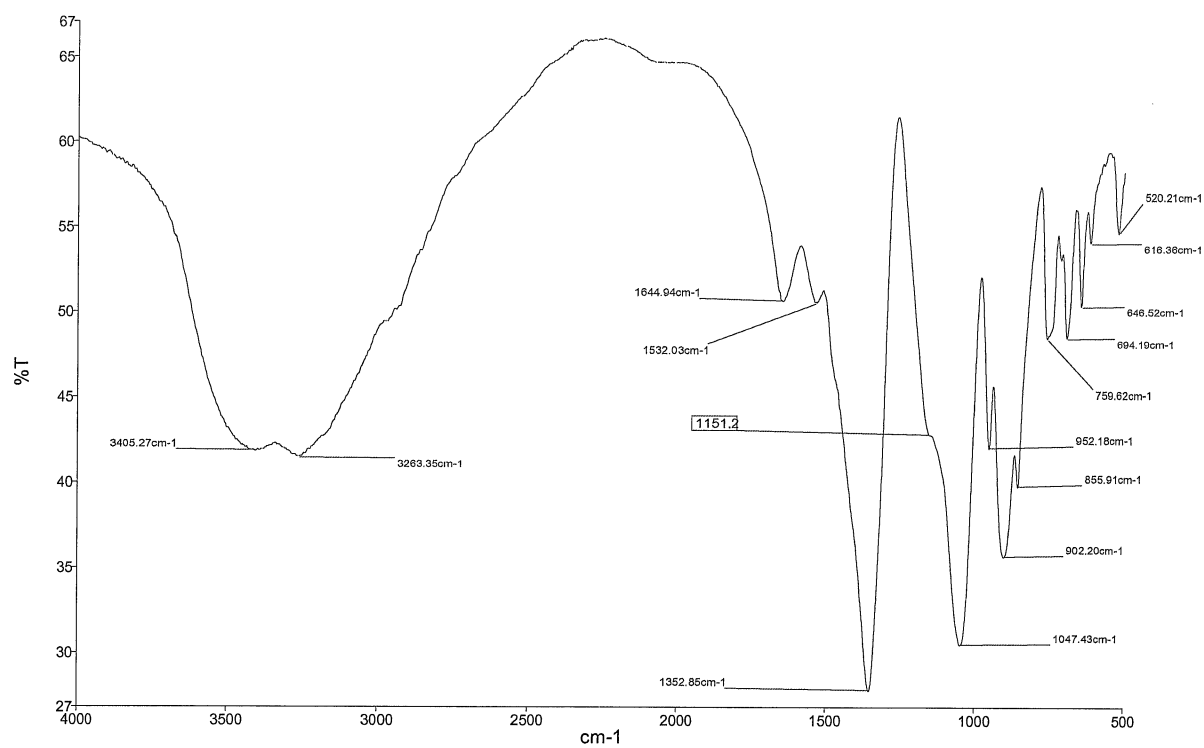

Zn+1,3-dap+B S.C.
